# Supplementary material
Source: PubMed Central journal article supplement (PMC4520234)

**Removal of Metabolic Liabilities Enables Development of Derivatives of Procaspase-Activating  
Compound 1 (PAC-1) with Improved Pharmacokinetics**

*Howard S. Roth,<sup>1</sup> Rachel C. Botham,<sup>1</sup> Steven C. Schmid,<sup>1</sup> Timothy M. Fan,<sup>2</sup> Levent Dirikolu,<sup>3</sup> and Paul J.*

*Hergenrother<sup>1\*</sup>*

**Supporting Information**

<sup>1</sup>Department of Chemistry

<sup>2</sup>Department of Veterinary Clinical Medicine

<sup>3</sup>Department of Veterinary Biosciences

University of Illinois

Urbana, IL

\*To whom correspondence should be addressed.

Phone: 217/333-0363

Fax: 217/244-8024

E-mail: hergenro@illinois.edu

## Table of Contents

### Biological Evaluation

|                                                                           |       |
|---------------------------------------------------------------------------|-------|
| <b>Materials and Methods.</b> .....                                       | S3-S6 |
| <i>Materials.</i> .....                                                   | S3    |
| <i>Liver Microsome Stability Assay.</i> .....                             | S3    |
| <i>Cell Culture.</i> .....                                                | S3    |
| <i>72hr IC<sub>50</sub> Cell Death Assay.</i> .....                       | S3    |
| <i>Induction of Apoptosis by Hit Compounds.</i> .....                     | S4    |
| <i>EGTA Fluorescence Titration Assay.</i> .....                           | S4    |
| <i>Caspase Activity in Cell Lysate.</i> .....                             | S5    |
| <i>Evaluation of Compound Tolerability in vivo.</i> .....                 | S5    |
| <i>Pharmacokinetics of PAC-1 and Derivatives in Mice.</i> .....           | S6    |
| <i>Assessment of Serum Concentrations of PAC-1 and Derivatives.</i> ..... | S6    |

### Supporting Figures

|                                                                                      |     |
|--------------------------------------------------------------------------------------|-----|
| <b>Figure S1.</b> Starting materials used for synthesis of hydrazides. ....          | S7  |
| <b>Figure S2.</b> Cell death induced by <b>PAC-1</b> analogues in U-937 cells. ....  | S8  |
| <b>Figure S3.</b> LC/MS results from liver microsome stability experiments. ....     | S12 |
| <b>Figure S4.</b> Formation curves for zinc binding determination. ....              | S18 |
| <b>Figure S5.</b> Cell death induced by <b>PAC-1</b> analogues in Jurkat cells. .... | S19 |
| <b>Figure S6.</b> Cell death induced by <b>PAC-1</b> analogues in EL4 cells. ....    | S19 |
| <b>Figure S7.</b> Cell death induced by <b>PAC-1</b> analogues in GL-1 cells. ....   | S20 |
| <b>Figure S8.</b> Cell death induced by <b>PAC-1</b> analogues in OSW cells. ....    | S20 |

|                          |     |
|--------------------------|-----|
| <b>References.</b> ..... | S21 |
|--------------------------|-----|

|                           |          |
|---------------------------|----------|
| <b>NMR Spectra.</b> ..... | S22-S183 |
|---------------------------|----------|

## Biological Evaluation

### Materials and Methods

*Materials* All reagents were obtained from Fisher unless otherwise indicated. All buffers were made with MilliQ purified water. Annexin V Binding Buffer contains 10 mM HEPES (pH 7.4), 140 mM NaCl, 2.5 mM CaCl<sub>2</sub>. Bifunctional cell lysis/caspase activity buffer contains 200 mM HEPES (pH 7.4), 400 mM NaCl, 40 mM DTT, 0.4 mM EDTA disodium salt dihydrate, 1% TritonX, and 20 μM Ac-DEVD-AFC (Enzo Life Sciences).

*Liver Microsome Stability Assay* A mixture of 0.1 M potassium phosphate buffer pH 7.4, NADP<sup>+</sup> (final concentration 1.3 mM), MgCl<sub>2</sub> (final concentration 3.3 mM), glucose-6-phosphate (final concentration 3.3 mM), glucose-6-phosphate dehydrogenase (final concentration 0.4 U/mL), and a 10 mM solution of compound in DMSO (final concentration 10 μM; 0.1% DMSO) was incubated at 37°C in a shaking incubator for 5 min. The reactions were initiated by the addition of ice-cold liver microsomes (final protein concentration 1 mg/mL), to bring the total volume to 1 mL. A 450 μL aliquot was immediately removed, quenched with 450 μL of a 10 μM solution of **B-PAC-1**<sup>3, 4</sup> (internal standard for LC/MS; compound **3**{18,7} in ref.<sup>3</sup>) in MeCN, mixed by inversion, and centrifuged at 10,000 x g for 3 min. 750 μL of the supernatant was removed for LC/MS analysis. The reactions were incubated at 37°C in a shaking incubator for 3 h. A second 450 μL aliquot was removed, quenched with 450 μL of a 10 μM solution of **B-PAC-1** in MeCN, mixed by inversion, and centrifuged at 10,000 x g for 3 min. 750 μL of the supernatant was removed for LC/MS analysis. Samples from the liver microsome assay were analyzed by LC/MS using an Agilent 1200 HPLC with DAD (monitoring at 280 nm) and an Agilent 6230 TOF MS, with an Agilent C18 column, 3.0 x 50 mm. Mobile phase A was 0.1% HCO<sub>2</sub>H in H<sub>2</sub>O, B was 0.1% HCO<sub>2</sub>H in MeCN. A gradient was run from 5-50% B over 18 min, then 50-95% B for 2 min, then constant 95% B for 4 min, then 95-5% B for 1 min, then constant 5% B for 2 min. The ratio of the areas of analyte:internal standard at 3 hours was compared to the ratio at 0 hours to determine the percent compound remaining after 3 hours.

*Cell Culture* U-937, Jurkat, and EL4 cells were obtained from the American Type Culture Collection. GL-1 cells were provided by Dr. Steve Suter (North Carolina State University, Raleigh, NC). All cultures were maintained at low passage number in RPMI 1640 supplemented with 10% fetal bovine serum and 1% penicillin-streptomycin and grown at 37°C and 5% CO<sub>2</sub>.

*72hr IC<sub>50</sub> Cell Death Assay* To each well of a 96-well plate was added 49 μL of RPMI 1640 complete growth media. To each well was added 1 μL of compound stock solutions in DMSO at nine concentrations such that the cells were treated with half-log concentrations between 0.01 μM and 100 μM compound. 50 μL of a suspension of cells at 300,000 cells/mL (for U-937, EL4, GL-1, and OSW cells) or 500,000 cells/mL (for Jurkat

cells) were plated into the wells, for a final density of 15,000 or 25,000 cells per well, respectively. Each concentration was tested in triplicate per plate. In each plate 3 wells received 1  $\mu\text{L}$  of a positive death control and 3 wells received 1  $\mu\text{L}$  DMSO as a negative control. The plates were then incubated at 37°C with 5%  $\text{CO}_2$  for 72 hours. After the 72 hour incubation period, the plates were analyzed using a Sulforhodamine B assay.<sup>5</sup> Specifically, to each well of the plate 25  $\mu\text{L}$  of a 50% (w/v) solution of trichloroacetic acid in  $\text{H}_2\text{O}$  was added and the plates were incubated for 4 hours at 4°C. The plates were then washed gently with  $\text{H}_2\text{O}$  five times. The plates were allowed to air dry after which 100  $\mu\text{L}$  of a 0.057% (w/v) Sulforhodamine B in a 1% (v/v) acetic acid solution was added to each well for 30 minutes at room temperature. The plates were gently washed 5 times with 1% (v/v) acetic acid and air dried. 200  $\mu\text{L}$  of 10 mM Tris base (pH 10.4) was added to each well and the plates were placed on a shaker for thirty minutes. For U-937 cells, the level of SRB was quantified fluorometrically (ex. 488 nm, em. 585 nm) on a Gemini EM Microplate Reader (Molecular Devices) plate reader. For all other cell lines, the level of SRB was quantified by absorbance at 510 nm on a SpectraMax Plus 384 Microplate Reader (Molecular Devices). The percent cell death was calculated and normalized to the positive control (100% cell death) and the negative control (0% cell death). The percent cell death was averaged for each compound concentration and plotted as a function of compound concentration. The data were fit to a logistical dose response curve using TableCurve 2D and the  $\text{IC}_{50}$  value was calculated. The experiment was repeated three times and the average of the calculated  $\text{IC}_{50}$  values was reported. The standard error of the mean (s.e.m.) was determined and reported for the triplicate experiments.

*Induction of Apoptosis by Hit Compounds* To each well of a 24-well plate for compound treatment was added 490  $\mu\text{L}$  of RPMI-1640 complete growth media. To each well was then added 10  $\mu\text{L}$  of 5 mM DMSO solutions to achieve a final compound concentration of 50  $\mu\text{M}$ . 10  $\mu\text{L}$  of DMSO was added to one well as a live cell control. 500  $\mu\text{L}$  of a suspension of cells at  $1.2 \times 10^6$  cells/mL were plated into the wells, for a final density of 600,000 cells per well. Wells not containing compounds were filled with 1 mL RPMI-1640 complete growth media, and spaces between wells were filled with 1 mL sterile PBS. The cells were incubated at 37 °C with 5%  $\text{CO}_2$  for 12 hours. The cells were harvested via centrifugation (200 x g for 5 min), washed with PBS (2 mL), and resuspended in 450  $\mu\text{L}$  Annexin V Binding Buffer containing 3.5  $\mu\text{L}$  of FITC-conjugated Annexin V stain (Southern Biotech) and 2.25  $\mu\text{L}$  of a 1 mg/mL solution of propidium iodide (Sigma) to a final concentration of 5  $\mu\text{g}/\text{mL}$ . Samples were stored on ice until assessment. Cell populations were analyzed on a Becton Dickinson LSR II cell flow cytometer. 10,000 events per sample were recorded.

*EGTA Fluorescence Titration Assay* This titration assay is based on a published protocol.<sup>6</sup> Buffer (50 mM HEPES, 100 mM  $\text{KNO}_3$ , 8.1 mM EGTA, pH 7.2) and solutions of compounds (1 mM in DMSO) and  $\text{Zn}(\text{OTf})_2$  (100  $\mu\text{M}$ -1 M in  $\text{H}_2\text{O}$ ) were prepared. The compound solutions were diluted ten-fold with buffer

(final [compound] = 100  $\mu$ M, final [EGTA] = 7.3 mM), and 198  $\mu$ L of the resulting solution was added to each well of a 96-well plate. Each of 24 Zn(OTf)<sub>2</sub> solutions was added to four wells in each plate. The wells were allowed to equilibrate for 5 minutes, and the plates were analyzed via a Molecular Devices SpectraMax M3 fluorescent plate reader (ex. 410 nm, em. 475 nm). Fluorescence intensity at 475 nm of each of four technical replicates was plotted against free Zn<sup>2+</sup> concentration ([Zn<sup>2+</sup>]<sub>F</sub>), calculated using the MaxChelator program (maxchelator.stanford.edu). The data were analyzed using OriginPro 9.1 and fitted to a formation curve based on Eq S1:<sup>6</sup>

$$I = (I_{\min}K_d + I_{\max}[Zn^{2+}]_F)/(K_d + [Zn^{2+}]_F) \quad \text{Eq S1}$$

where  $I_{\min}$  and  $I_{\max}$  were defined as the fluorescence intensity of the free probe (**PAC-1** or derivative) and that of the Zn<sup>2+</sup>-probe complex, respectively.

*Caspase Activity in Cell Lysate* To each inner well of two 96-well plates was added 100  $\mu$ L of a suspension of U-937 cells in phenol red-free RPMI-1640 complete growth media at 500,000 cells/mL (50,000 cells/well). Inner wells without compound were filled with 200  $\mu$ L of media, and outer wells were filled with 200  $\mu$ L of sterile PBS. The plates were incubated at 37°C with 5% CO<sub>2</sub> for 15 hours. Solutions of compounds (**PAC-1**, **S-PAC-1**, **7**, **30**, **32**, **41**, **PAC-1a**, staurosporine, or DMSO alone) in media were prepared at 3x final concentrations (3% DMSO), and 50  $\mu$ L of each solution was added to the appropriate wells. Each compound was tested in six wells per plate. In the first plate, 50  $\mu$ L of bifunctional cell lysis/caspase activity buffer was added to each treatment well. Fluorescence (ex. 400 nm, em. 505 nm) was monitored on an Analyst AD 96-384 plate reader via a 60-minute kinetic read, and the slope was used to determine caspase activity. The second plate was incubated at 37°C with 5% CO<sub>2</sub> for 16 hours, at which time 50  $\mu$ L of bifunctional cell lysis/caspase activity buffer was added to each treatment well, and fluorescence was monitored as above. The slopes at 16 hours were normalized to the slopes of each compound at 0 hours (0% activity) and the staurosporine-treated samples at 16 hours (100% activity) to give percent caspase activity.

*Evaluation of Compound Tolerability in vivo.* All experimental procedures were reviewed and approved by the University of Illinois Institutional Animal Care and Use Committee. 8-10 week old C57BL/6 mice were used in all experiments (Charles River). Mice (n = 3/cohort) were evaluated for their ability to tolerate a single 200 mg/kg intraperitoneal dosage of compounds, formulated at 5 mg/mL in 200 mg/mL hydroxypropyl- $\beta$ -cyclodextrin (HP $\beta$ CD) at pH 5.5. Mice were treated and observed for clinical signs over 24 hours; specifically, they were observed continuously for the first hour, then at hours 2, 4, 6, 8, 12 and 24 hours post-treatment. Mice were further allowed 1 week to demonstrate delayed effects of treatment. Toxicity was classified as inducing either an ‘excitatory’ or a ‘depressive’ phenotype. The extent of response was graded from mild to severe.

*Pharmacokinetics of PAC-1 and Derivatives in Mice.* Compounds were formulated at 5 mg/mL in 200 mg/mL HP $\beta$ CD at pH 5.5. C57/BL6 mice (n = 2 per cohort per time point) were treated with a 25 mg/kg dose of **PAC-1** or derivative via tail vein injection or oral gavage. At specified time points, mice were sacrificed and blood was collected, centrifuged, and the EDTA plasma was frozen at -80°C until analysis.

*Assessment of serum concentrations of PAC-1 and derivatives.* 2  $\mu$ L of a 10  $\mu$ g/mL solution of internal standard in 60:40 methanol:water (**PAC-1** was used as an internal standard for analysis of **S-PAC-1**; **S-PAC-1** was used as an internal standard for analysis of all other compounds) was added to a 10  $\mu$ L aliquot of serum. The proteins were precipitated by the addition of methanol (100  $\mu$ L). The sample was mixed by vortex and centrifuged to remove the proteins. The resulting supernatant was evaporated to complete dryness with a SpeedVac. The dried solid was then reconstituted in 100  $\mu$ L 60:40 methanol:water, followed by centrifugation. The supernatant was subject to instrument injection. Samples were analyzed with the 5500 QTRAP LC/MS/MS system (AB Sciex, Foster City, CA) in the Metabolomics Lab of the Roy J. Carver Biotechnology Center, University of Illinois at Urbana-Champaign. The 1200 series HPLC system (Agilent Technologies, Santa Clara, CA) includes a degasser, an autosampler, and a binary pump. The LC separation was performed on a Phenomenex 4u Polar-RP 80A column (4.6 x 100mm, 4 $\mu$ m, Torrance, CA) with mobile phase A (0.1% formic acid in water) and mobile phase B (methanol). The flow rate was 0.8 mL/min. The linear gradient was as follows: 0-1 min, 0% B; 5 min, 70% B; 7.5-10.5 min, 100% B; 10.6-15 min, 0% B. The autosampler was set at 5°C. The injection volume was 2  $\mu$ L. Mass spectra were acquired under negative electrospray ionization (ESI) with the ion spray voltage of -4500 V. The source temperature was 600°C. The curtain gas, ion source gas 1, and ion source gas 2 were 35, 50, and 65, respectively. Multiple reaction monitoring (MRM) was used for quantitation: **PAC-1**: m/z 391.1-->m/z 232.0; **S-PAC-1**: m/z 470.2-->m/z 311.1; compound **7**: m/z 423.1-->m/z 264.1; compound **30**: m/z 423.1-->m/z 246.1; compound **32**: m/z 448.1-->m/z 271.1; compound **41**: m/z 450.1-->m/z 271.1.

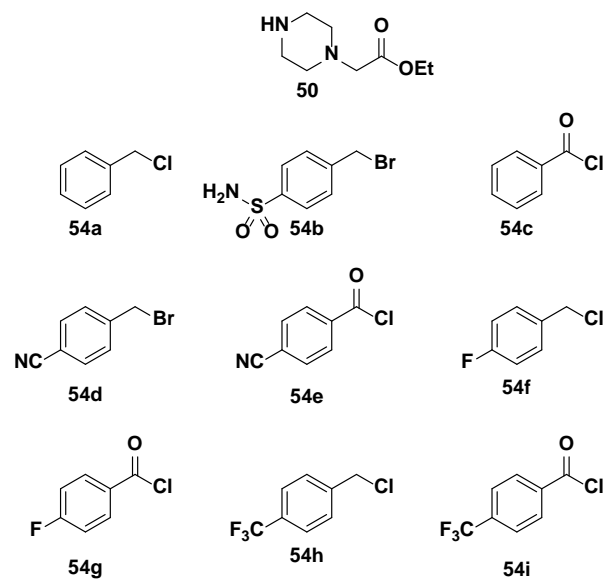

**Figure S1.** Starting materials used for synthesis of hydrazides.

**PAC-1:**  $IC_{50} = 10.2 \pm 0.3 \mu M$

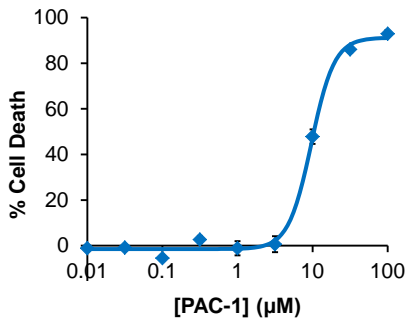

**S-PAC-1:**  $IC_{50} = 8.9 \pm 0.6 \mu M$

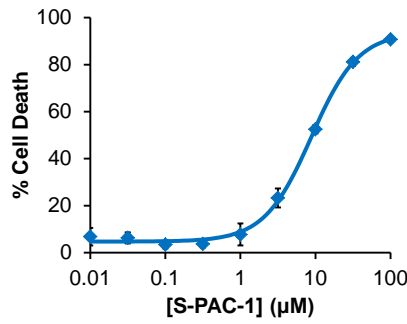

**3:**  $IC_{50} = 12.1 \pm 1.3 \mu M$

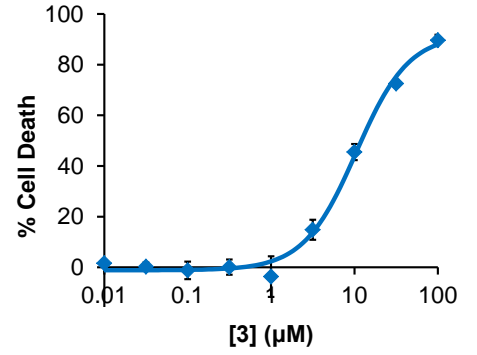

**4:**  $IC_{50} = 13.7 \pm 0.9 \mu M$

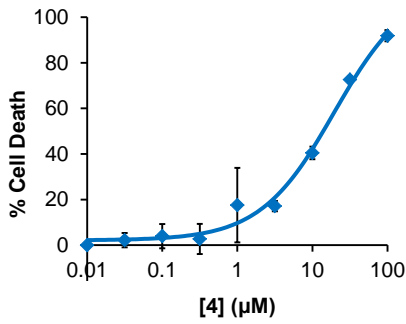

**5:**  $IC_{50} = 13.1 \pm 3.7 \mu M$

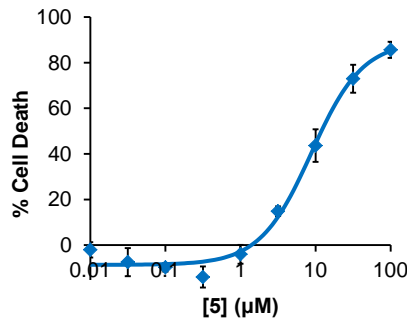

**6:**  $IC_{50} = 11.1 \pm 2.1 \mu M$

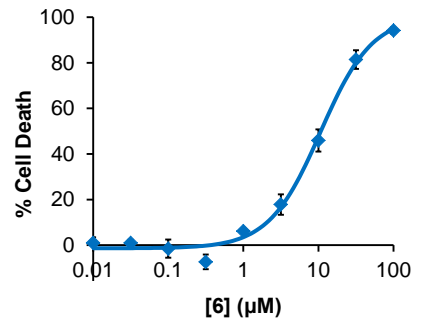

**7:**  $IC_{50} = 10.2 \pm 1.7 \mu M$

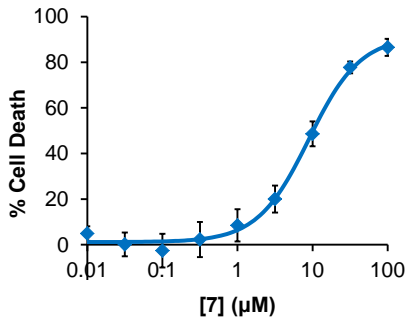

**8:**  $IC_{50} = 15.3 \pm 6.7 \mu M$

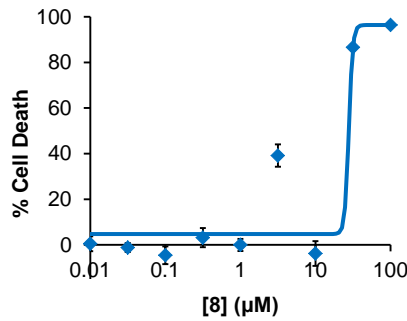

**9:**  $IC_{50} = 6.6 \pm 1.9 \mu M$

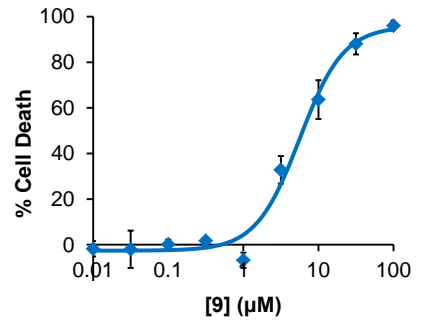

**10:**  $IC_{50} = 9.6 \pm 2.1 \mu M$

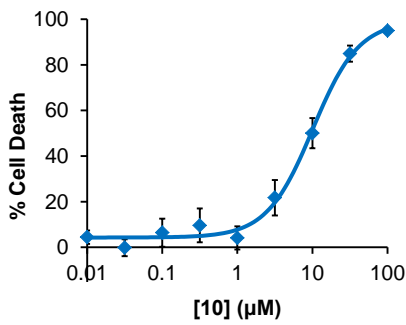

**11:**  $IC_{50} = 4.9 \pm 0.4 \mu M$

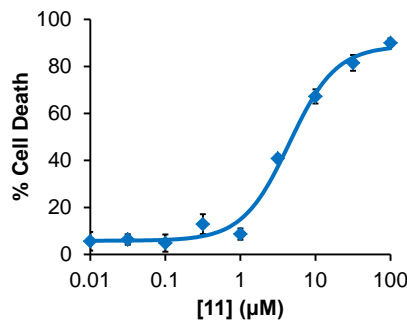

**12:**  $IC_{50} = 9.4 \pm 1.3 \mu M$

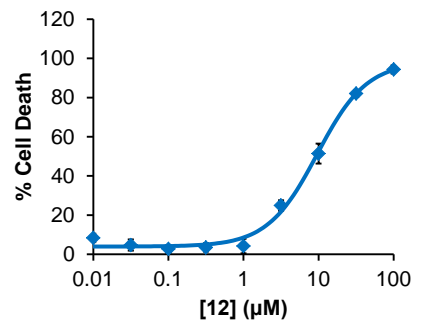



**13:**  $IC_{50} = 9.0 \pm 1.2 \mu M$

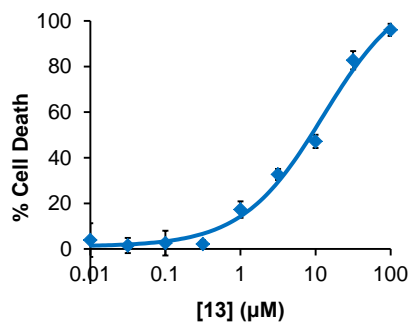

**14:**  $IC_{50} = 12.8 \pm 2.7 \mu M$

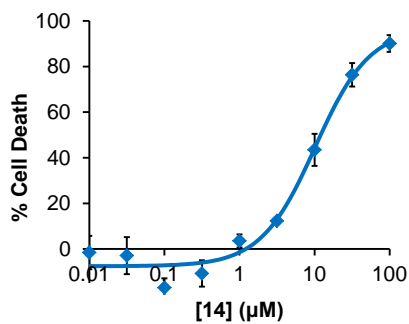

**15:**  $IC_{50} = 10.0 \pm 1.7 \mu M$

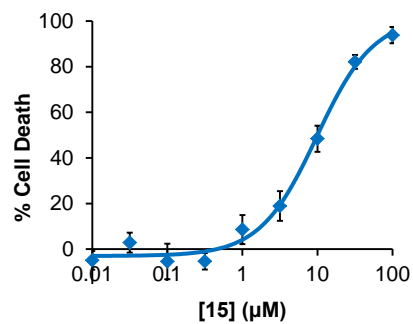

**16:**  $IC_{50} = 7.3 \pm 0.9 \mu M$

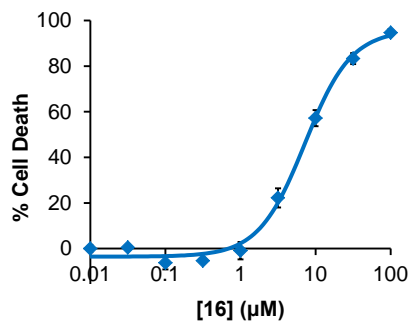

**17:**  $IC_{50} = 4.1 \pm 0.4 \mu M$

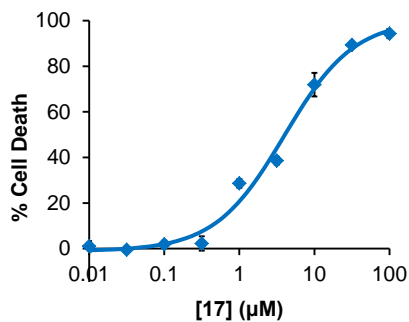

**18:**  $IC_{50} = 4.8 \pm 1.2 \mu M$

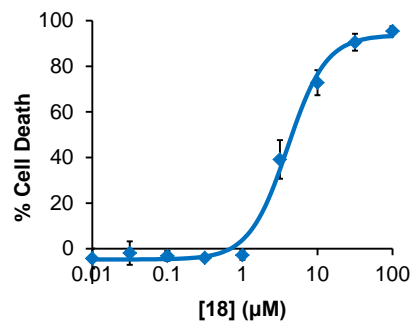

**19:**  $IC_{50} = 17.0 \pm 1.4 \mu M$

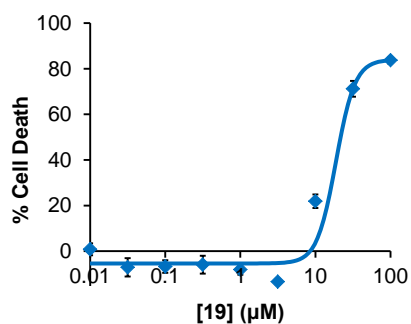

**21:**  $IC_{50} = 15.7 \pm 2.6 \mu M$

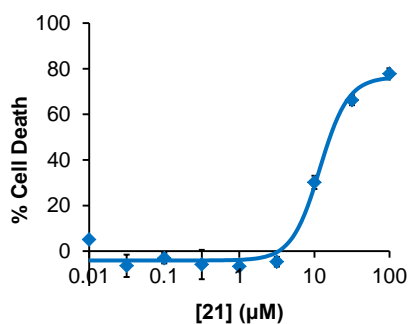

**23:**  $IC_{50} = 15.3 \pm 1.3 \mu M$

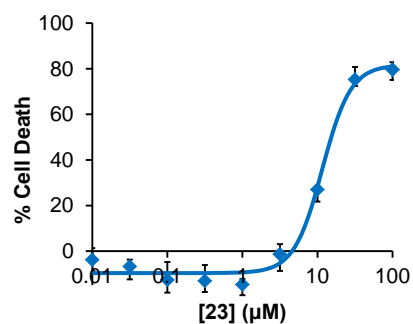

**25:**  $IC_{50} = 15.3 \pm 0.8 \mu M$

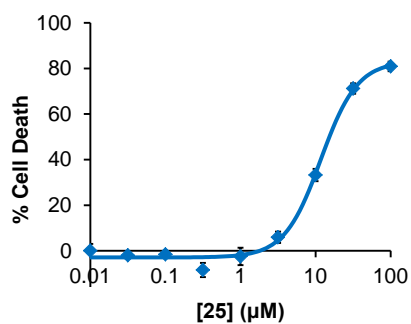

**26:**  $IC_{50} = 4.7 \pm 0.3 \mu M$

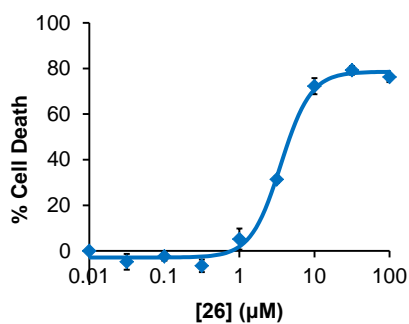

**27:**  $IC_{50} = 8.7 \pm 0.5 \mu M$

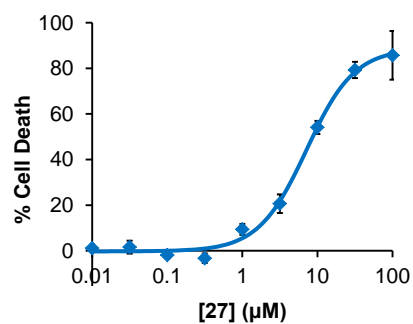

**28:**  $IC_{50} = 9.5 \pm 0.9 \mu M$

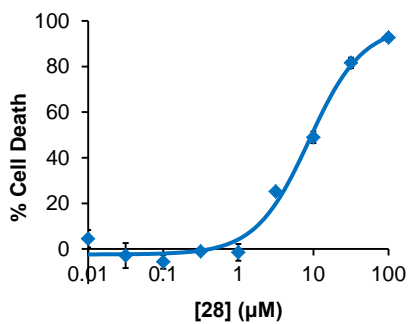

**29:**  $IC_{50} = 9.8 \pm 1.3 \mu M$

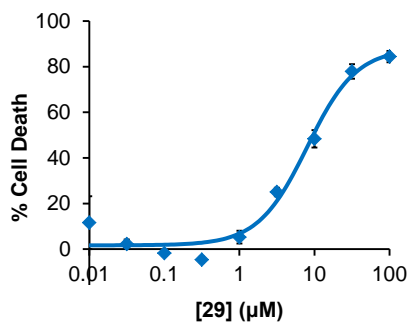

**30:**  $IC_{50} = 8.6 \pm 2.0 \mu M$

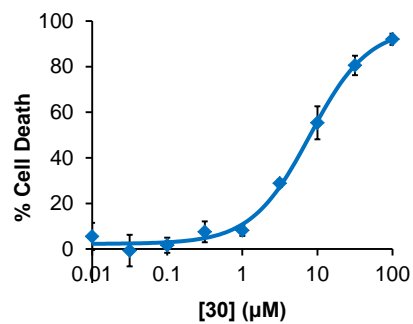

**31:**  $IC_{50} = 12.7 \pm 2.0 \mu M$

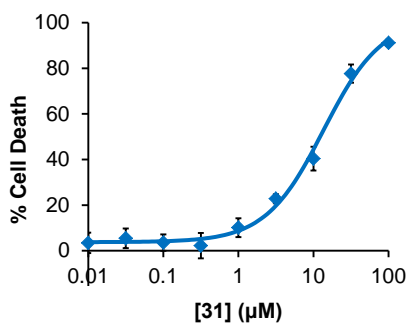

**32:**  $IC_{50} = 10.1 \pm 2.0 \mu M$

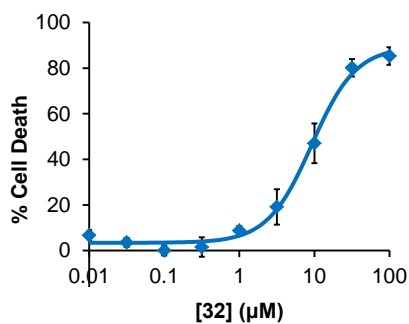

**33:**  $IC_{50} = 10.3 \pm 4.1 \mu M$

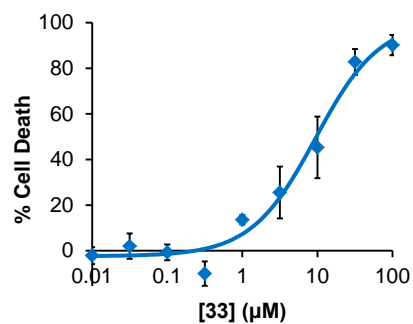

**34:**  $IC_{50} = 8.5 \pm 1.4 \mu M$

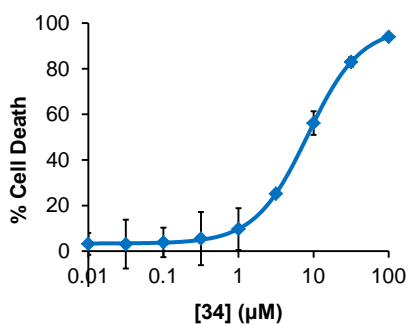

**35:**  $IC_{50} = 3.4 \pm 0.6 \mu M$

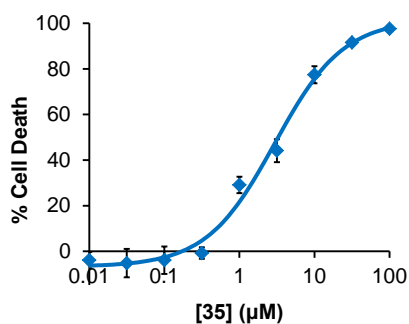

**36:**  $IC_{50} = 6.5 \pm 0.6 \mu M$

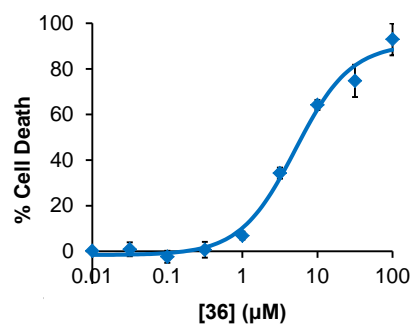

**37:**  $IC_{50} = 8.9 \pm 1.2 \mu M$

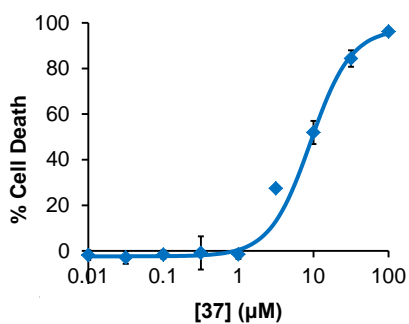

**38:**  $IC_{50} = 8.7 \pm 0.4 \mu M$

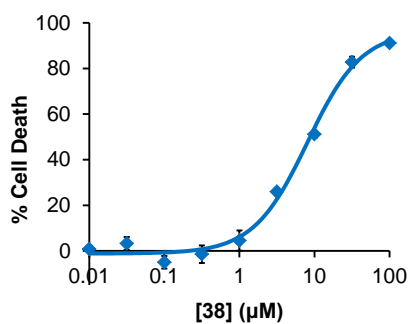

**39:**  $IC_{50} = 12.3 \pm 1.0 \mu M$

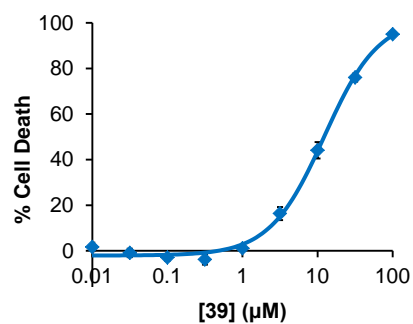

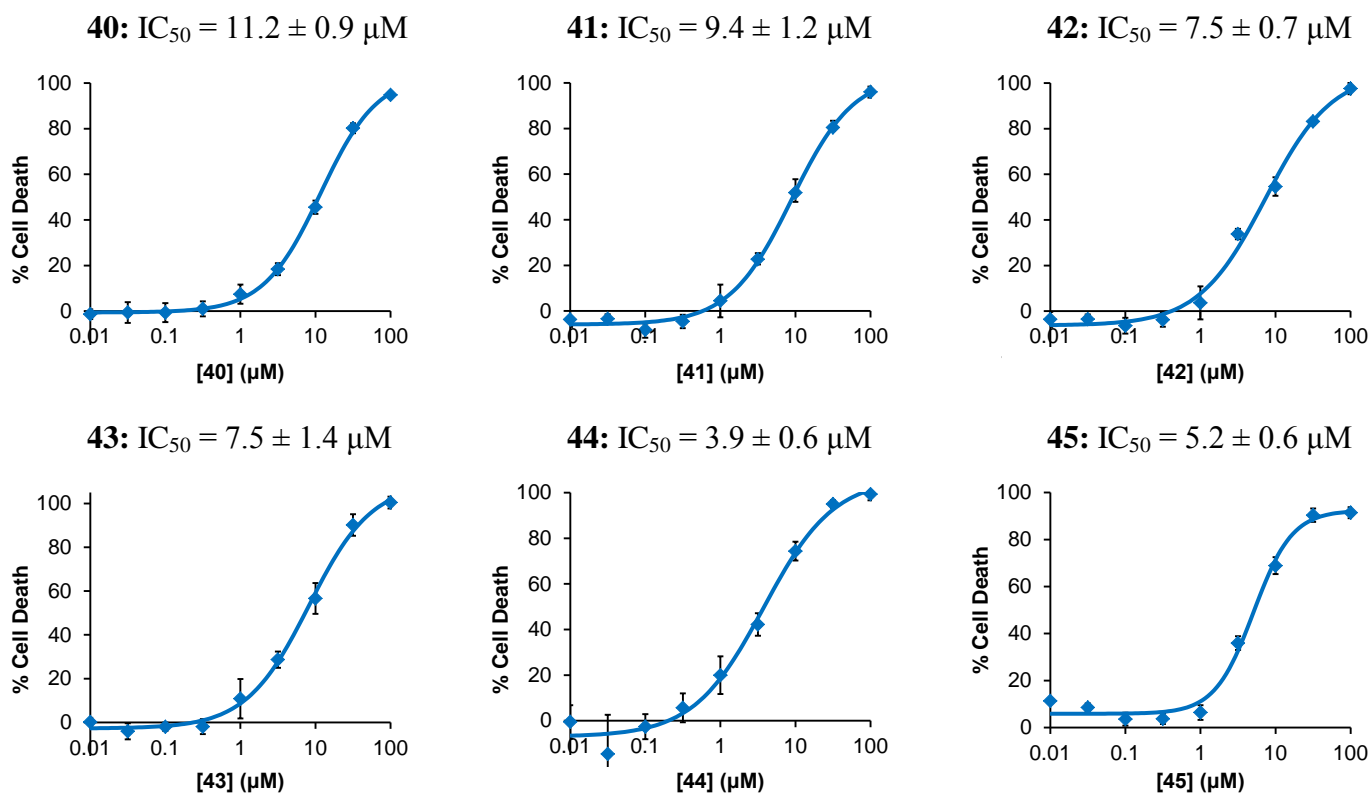

**Figure S2.** U-937 Cells treated with compounds for 72 hours. Biomass quantified by sulforhodamine B assay.

$IC_{50}$  values shown are mean  $\pm$  s.e.m. (n = 3).

**PAC-1: Stability =  $38 \pm 2\%$**

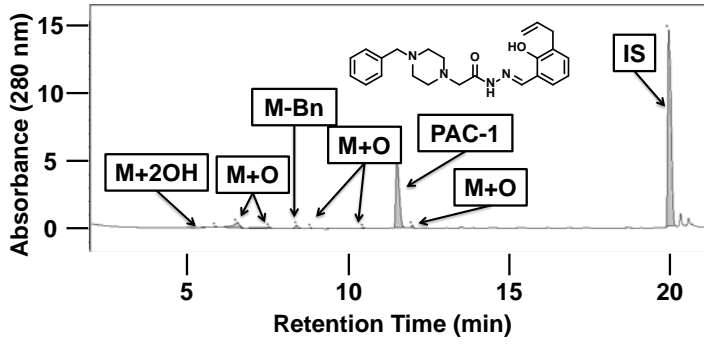

**S-PAC-1: Stability =  $84 \pm 1\%$**

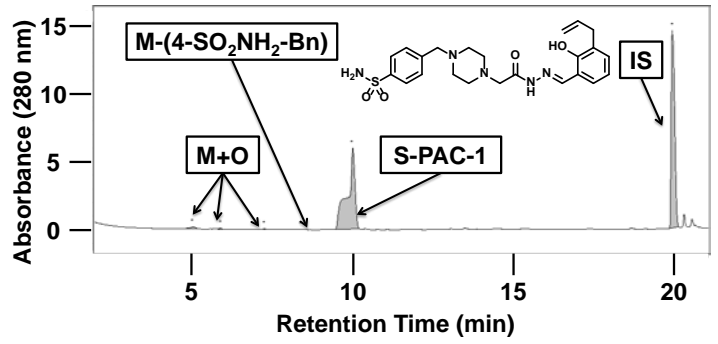

**3: Stability =  $89 \pm 4\%$**

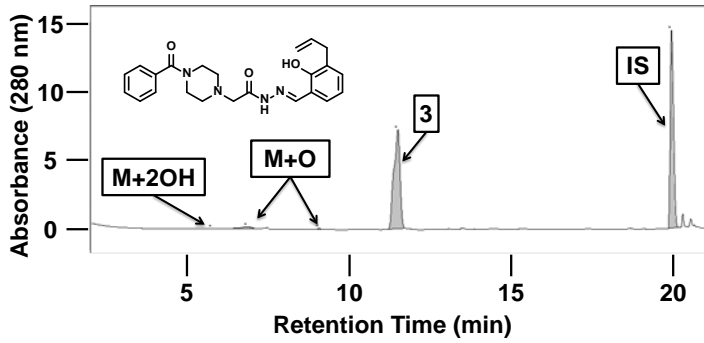

**4: Stability =  $48 \pm 2\%$**

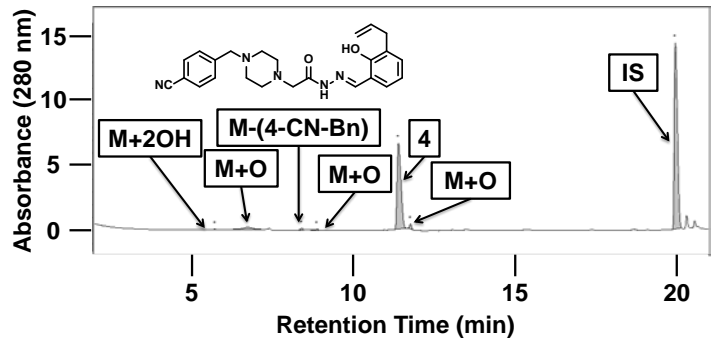

**5: Stability =  $90 \pm 4\%$**

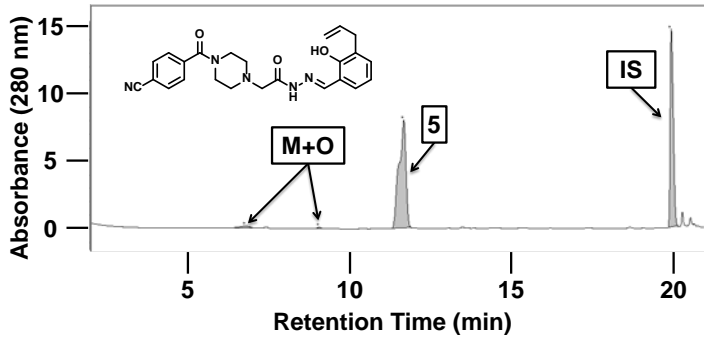

**6: Stability =  $31 \pm 1\%$**

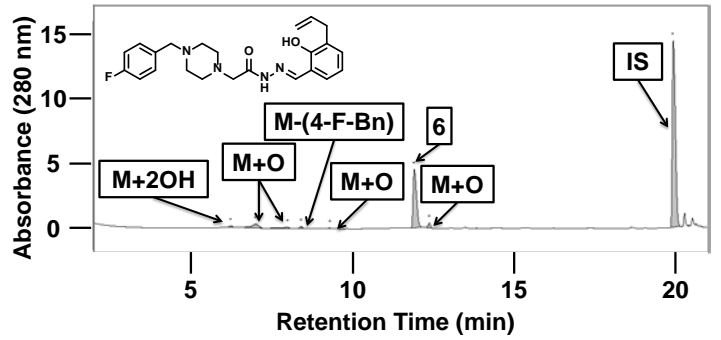

**7: Stability =  $86 \pm 2\%$**

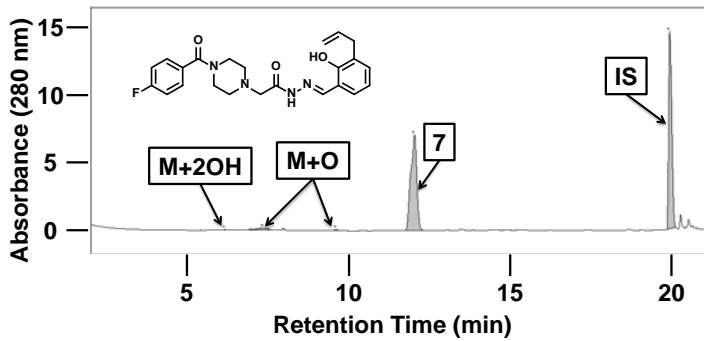

**8: Stability =  $16 \pm 1\%$**

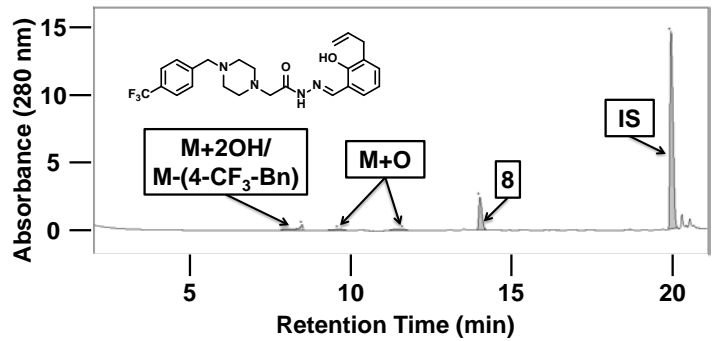

**9:** Stability =  $85 \pm 6\%$

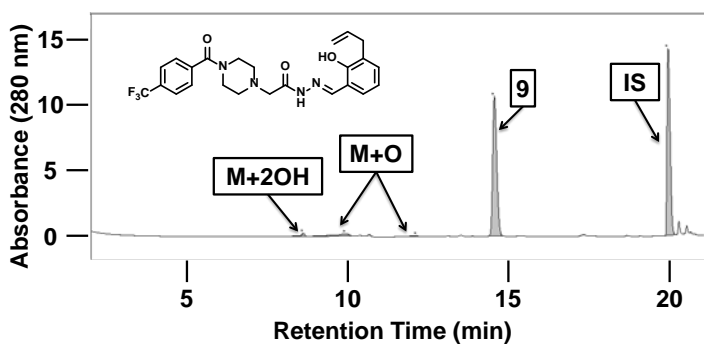

**10:** Stability =  $30 \pm 1\%$

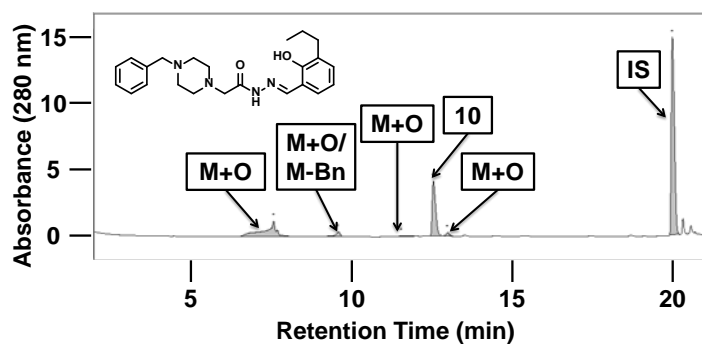

**11:** Stability =  $61 \pm 2\%$

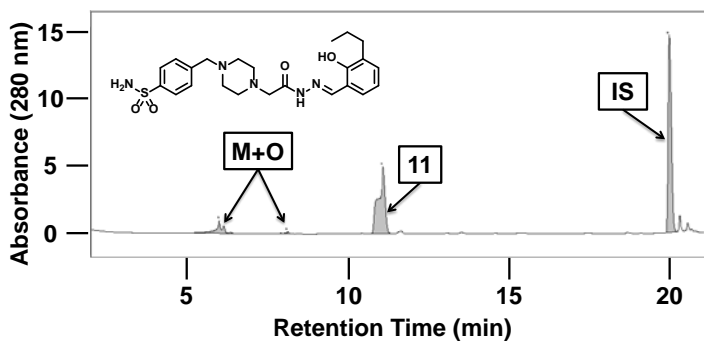

**12:** Stability =  $71 \pm 3\%$

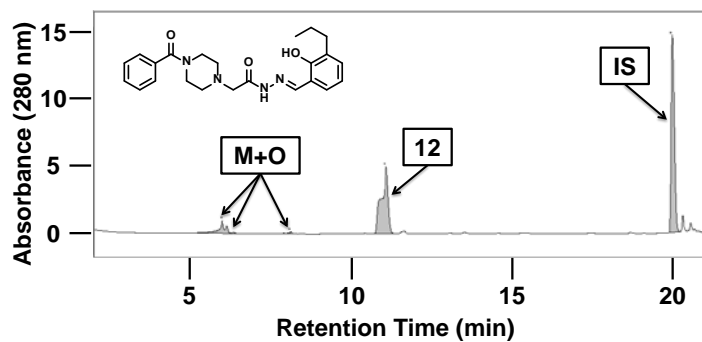

**13:** Stability =  $30 \pm 2\%$

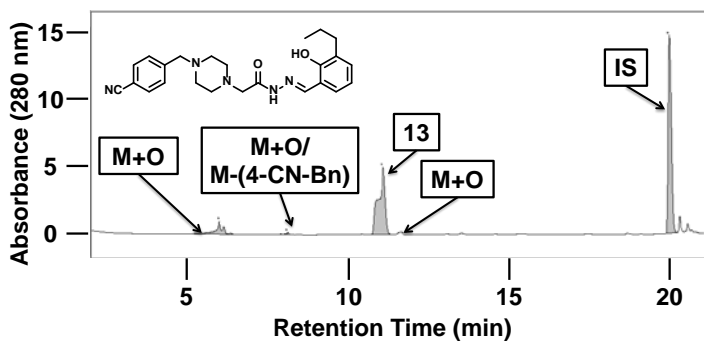

**14:** Stability =  $61 \pm 3\%$

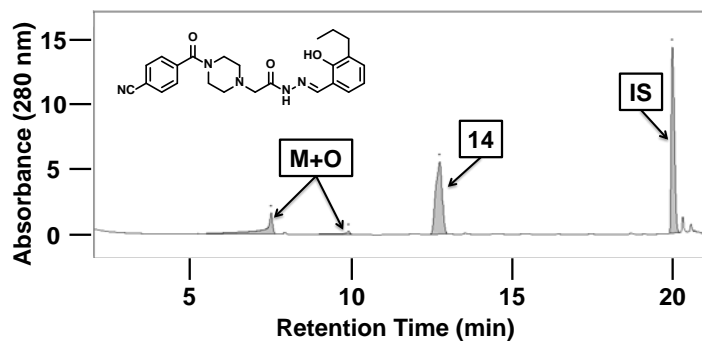

**15:** Stability =  $24 \pm 2\%$

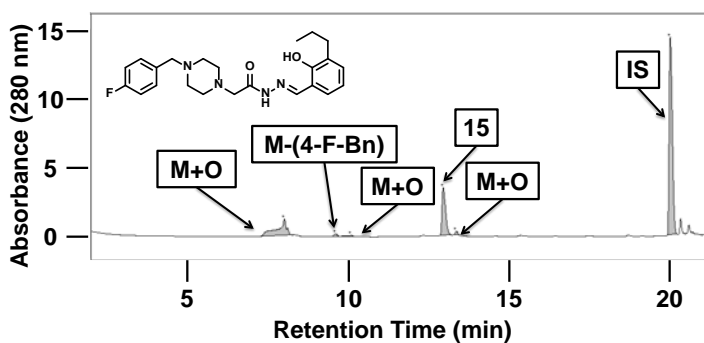

**16:** Stability =  $69 \pm 4\%$

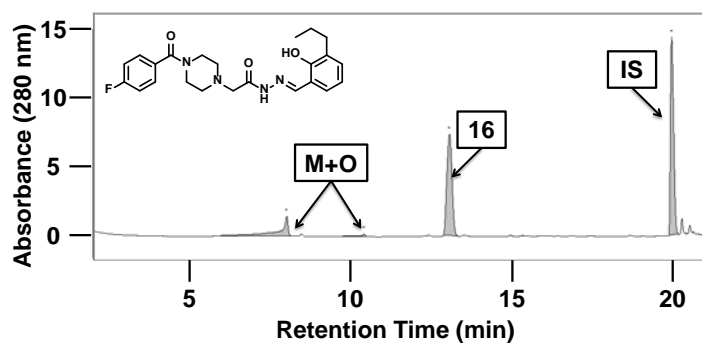

**17:** Stability =  $15 \pm 2\%$

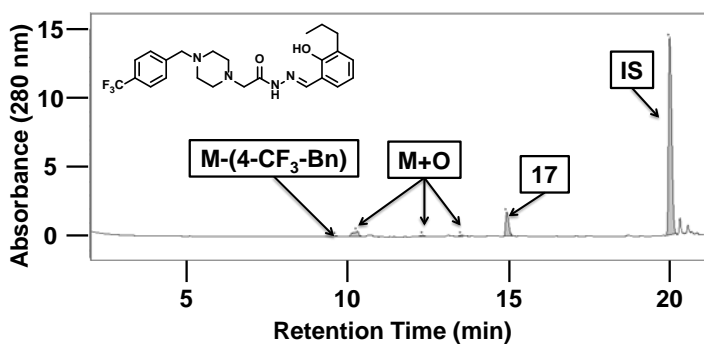

**18:** Stability =  $64 \pm 1\%$

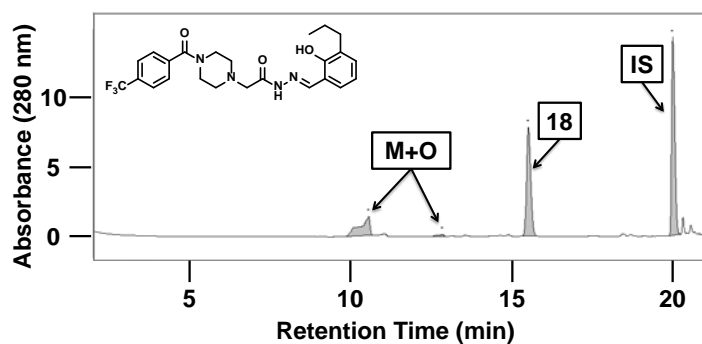

**19:** Stability =  $64 \pm 4\%$

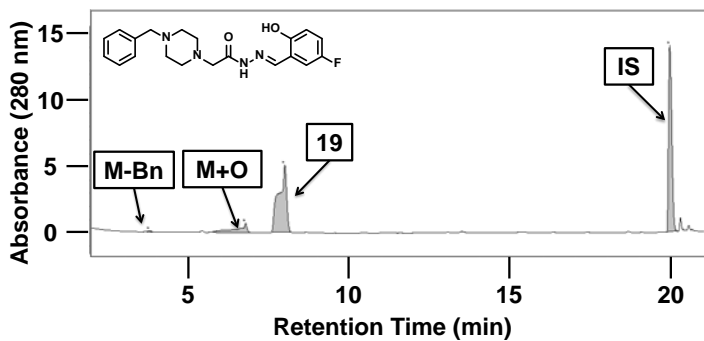

**21:** Stability =  $88 \pm 1\%$

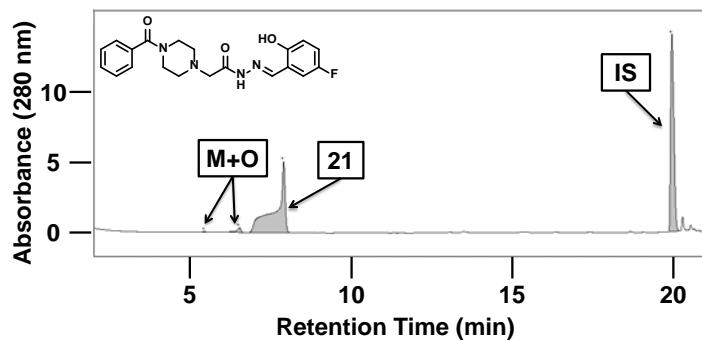

**23:** Stability =  $88 \pm 4\%$

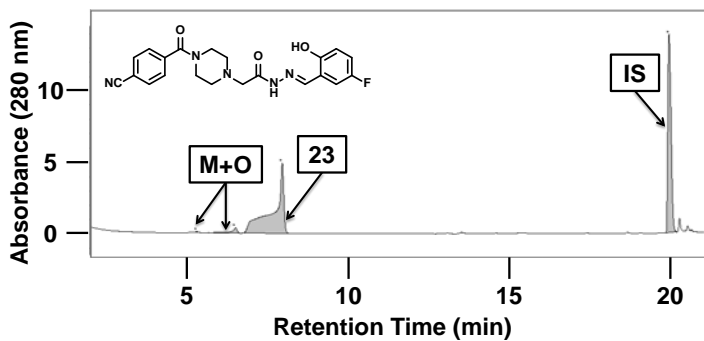

**25:** Stability =  $86 \pm 2\%$

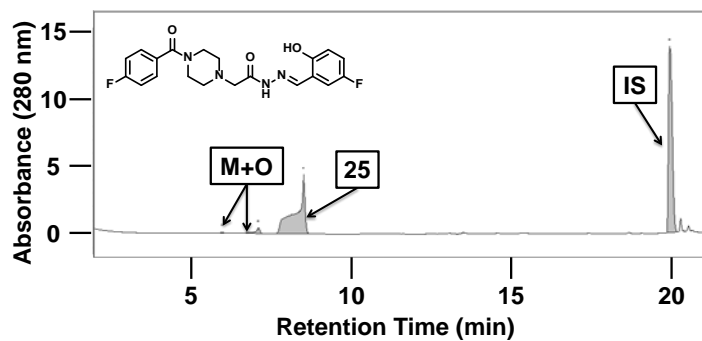

**26:** Stability =  $30 \pm 5\%$

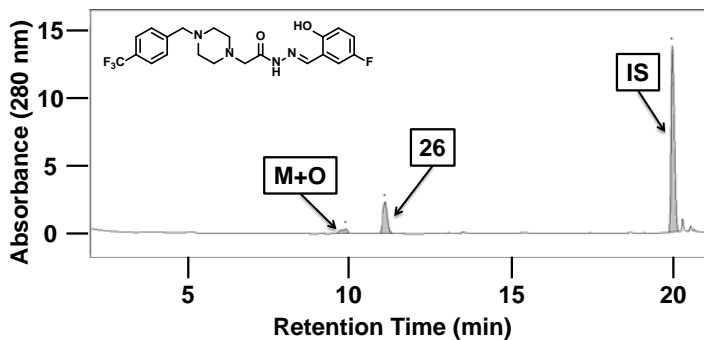

**27:** Stability =  $87 \pm 3\%$

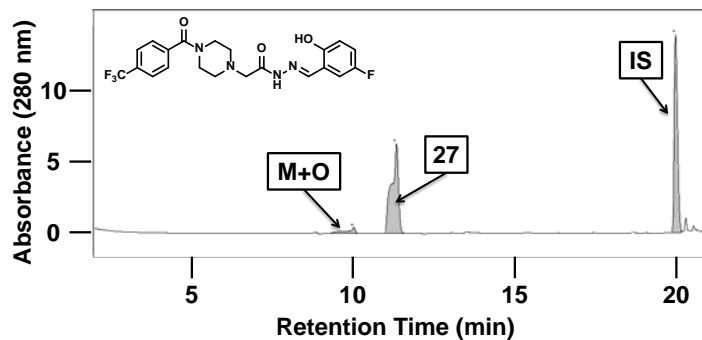

**28:** Stability =  $56 \pm 1\%$

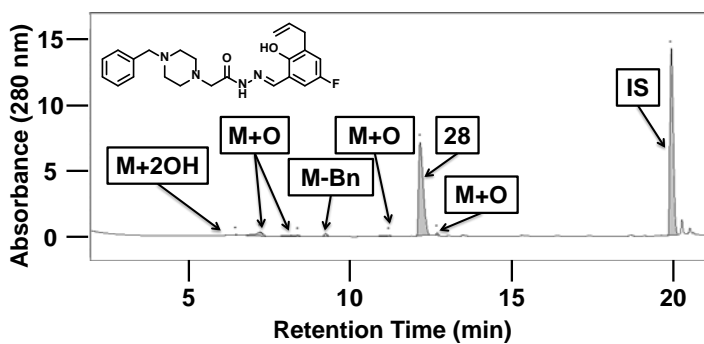

**29:** Stability =  $89 \pm 3\%$

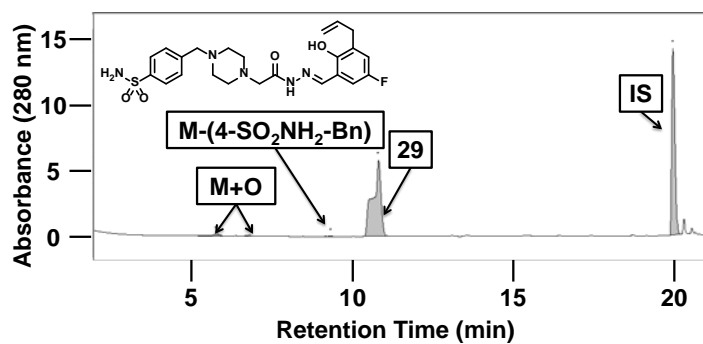

**30:** Stability =  $93 \pm 7\%$

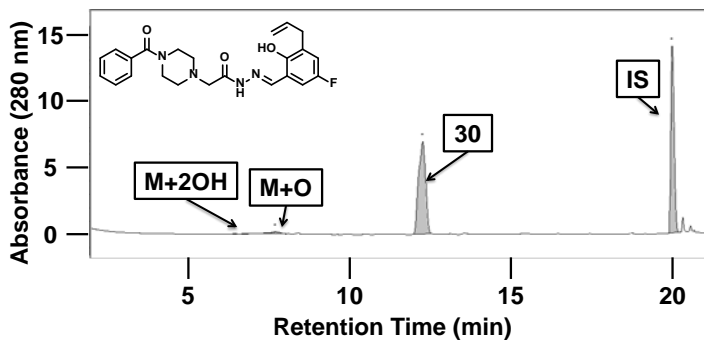

**31:** Stability =  $65 \pm 2\%$

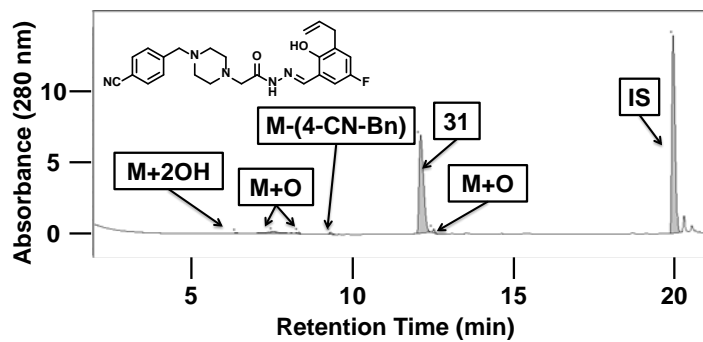

**32:** Stability =  $95 \pm 4\%$

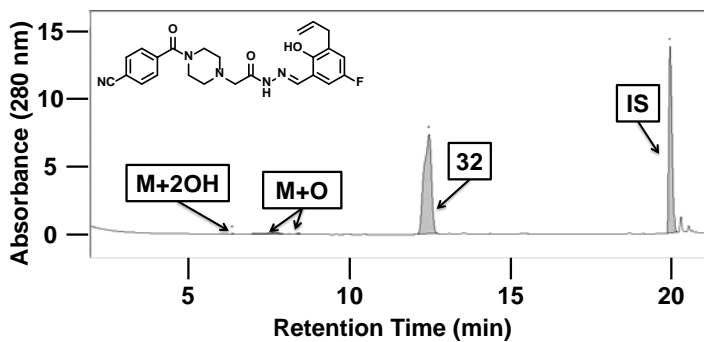

**33:** Stability =  $57 \pm 1\%$

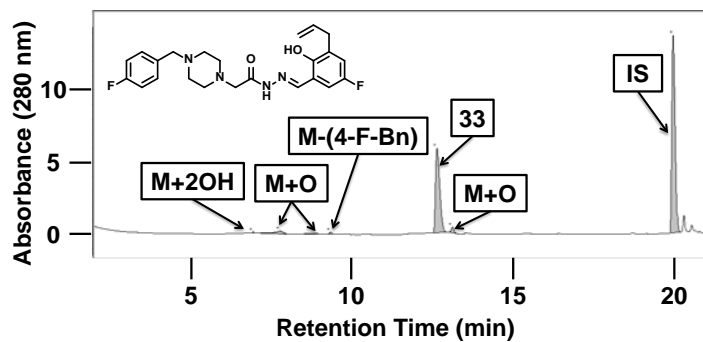

**34:** Stability =  $92 \pm 3\%$

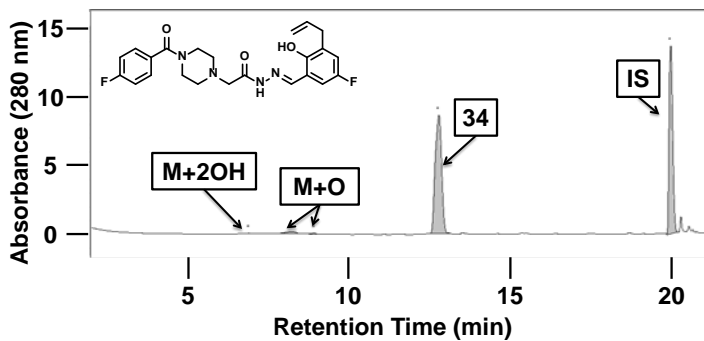

**35:** Stability =  $49 \pm 3\%$

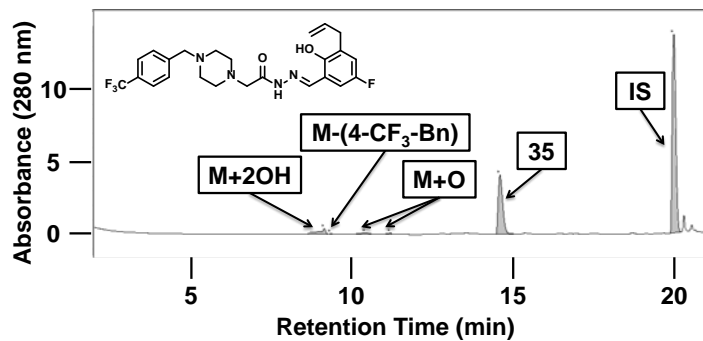

**36:** Stability =  $90 \pm 2\%$

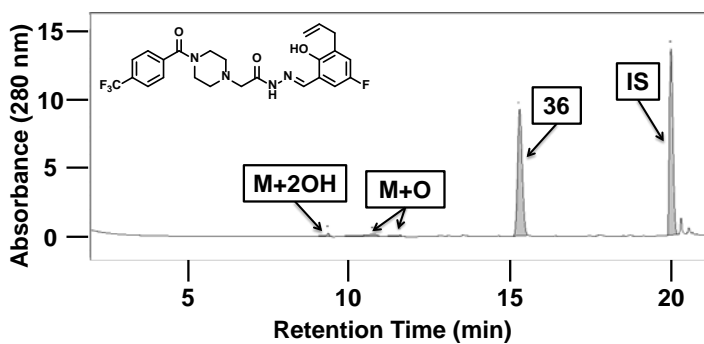

**37:** Stability =  $49 \pm 6\%$

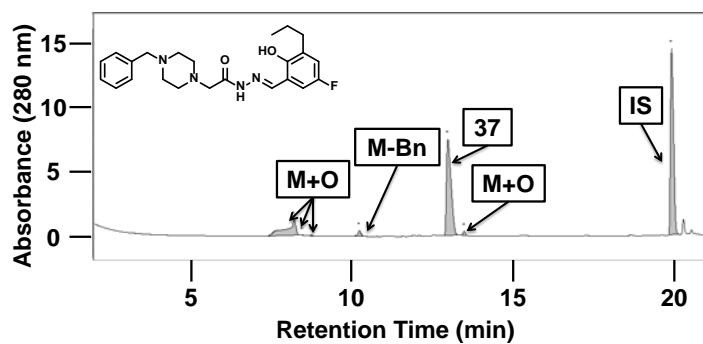

**38:** Stability =  $62 \pm 3\%$

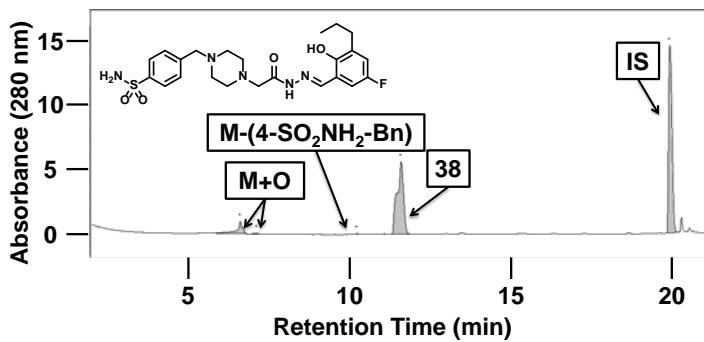

**39:** Stability =  $86 \pm 5\%$

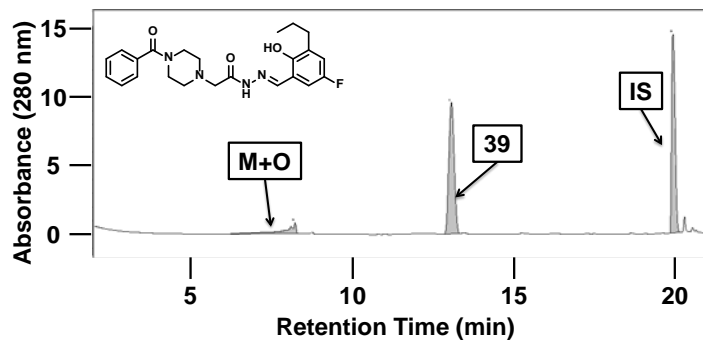

**40:** Stability =  $49 \pm 5\%$

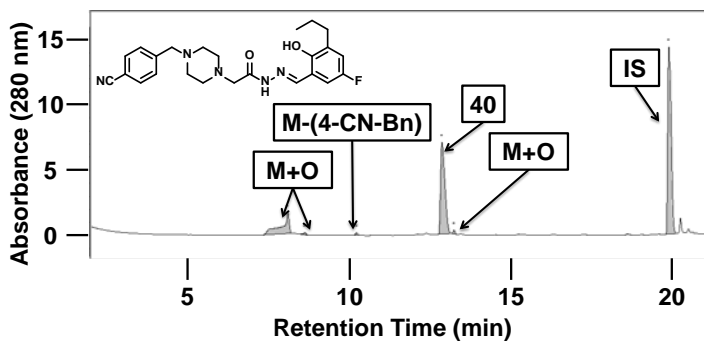

**41:** Stability =  $66 \pm 3\%$

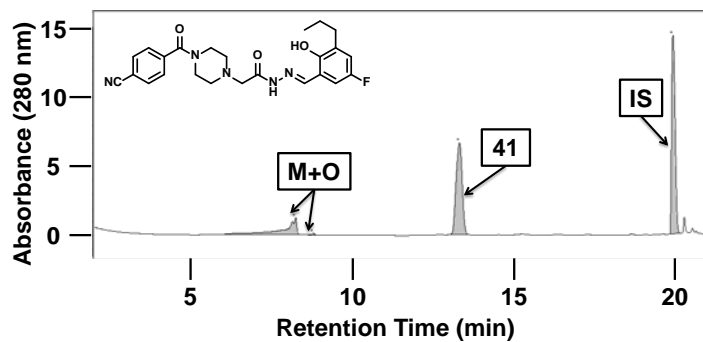

**42:** Stability =  $48 \pm 1\%$

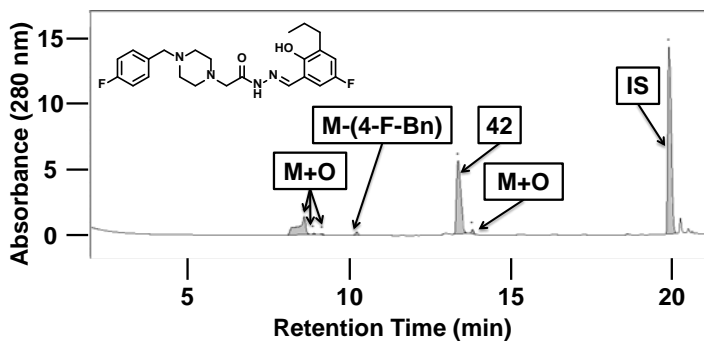

**43:** Stability =  $67 \pm 3\%$

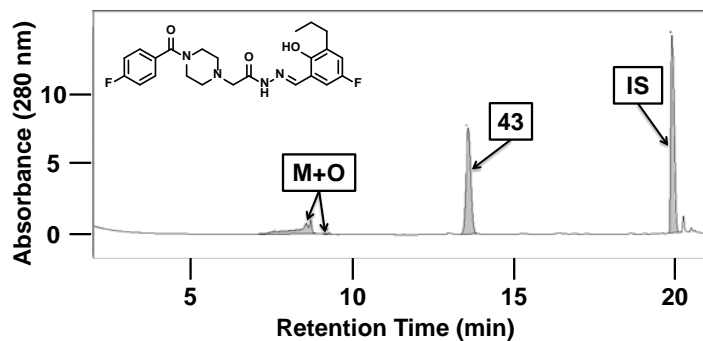



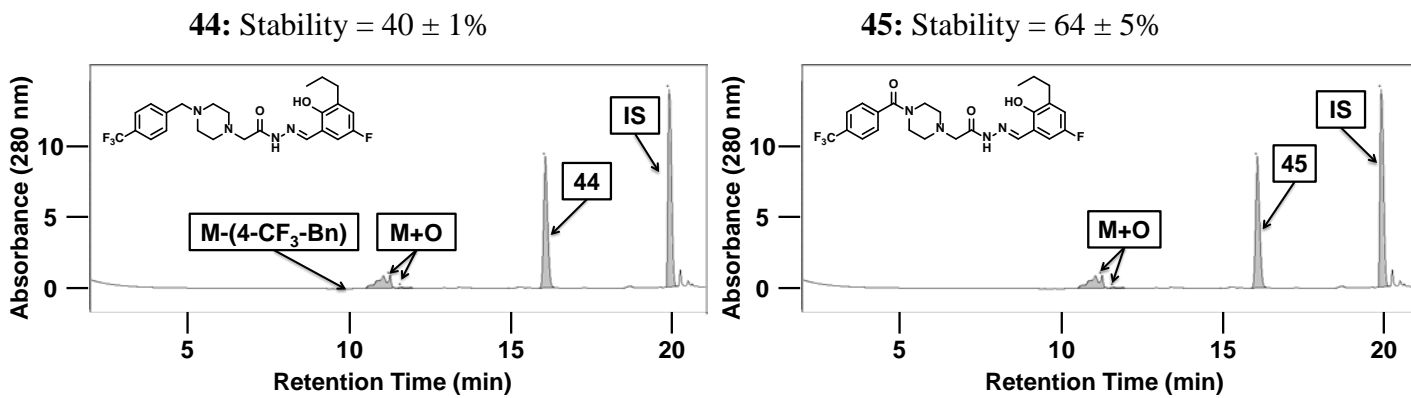

**Figure S3.** LC/MS results from liver microsome stability experiments of **PAC-1** analogues. IS = internal standard. Results are representative of three independent experiments. Values shown are mean  $\pm$  s.e.m. (n = 3).

**PAC-1:**  $K_d = 1.28 \pm 0.03$  nM

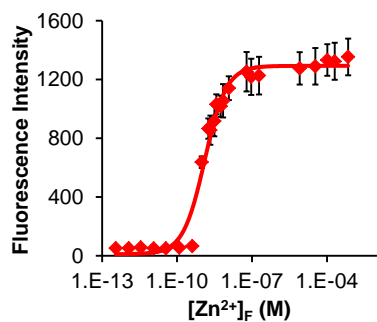

**S-PAC-1:**  $K_d = 2.72 \pm 0.13$  nM

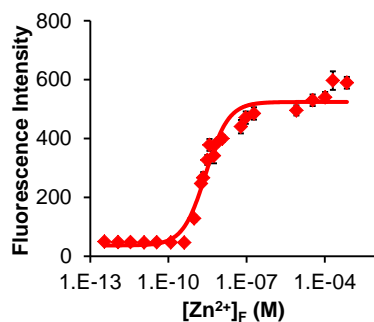

**7:**  $K_d = 1.46 \pm 0.07$  nM

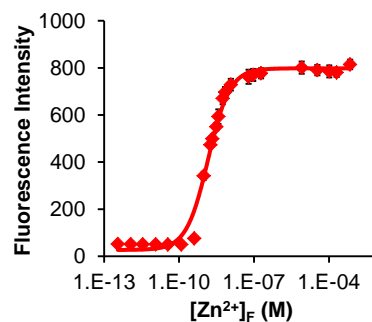

**30:**  $K_d = 1.07 \pm 0.09$  nM

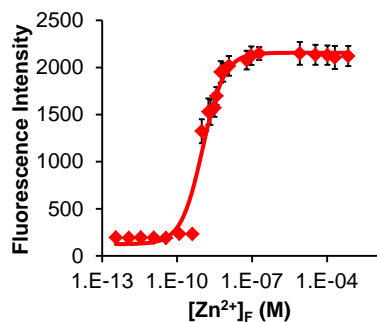

**32:**  $K_d = 1.37 \pm 0.10$  nM

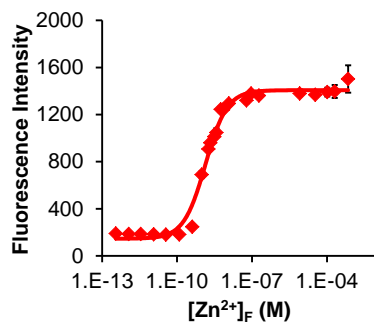

**41:**  $K_d = 1.37 \pm 0.03$  nM

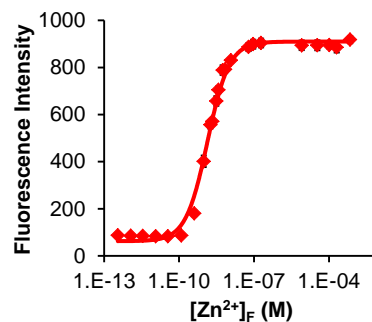

**PAC-1a:**  $K_d > 10^6$  nM

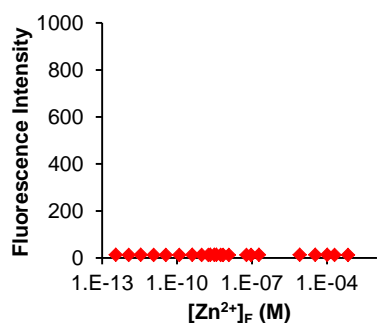

**Figure S4.** Increasing amounts of  $Zn(OTf)_2$  added to a buffered solution of EGTA (7.3 mM) and **PAC-1** derivative (100  $\mu$ M).  $K_d$  was determined by comparing fluorescence intensity (ex. 410 nm, em. 475 nm) and free zinc concentration. Values shown are mean  $\pm$  s.e.m. ( $n = 3$ ).

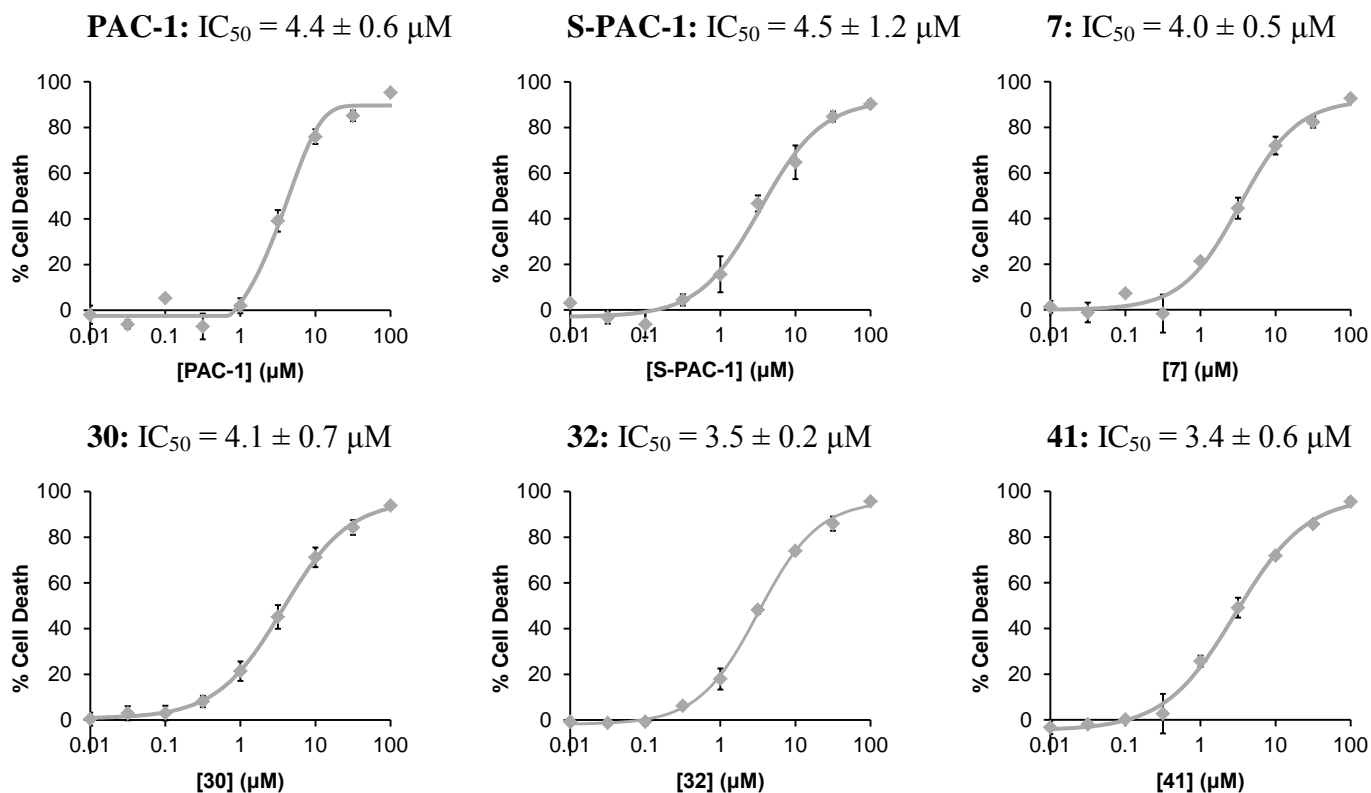

**Figure S5.** Jurkat cells treated with compounds for 72 hours. Biomass quantified by sulforhodamine B assay.

$IC_{50}$  values shown are mean  $\pm$  s.e.m. ( $n = 3$ ).

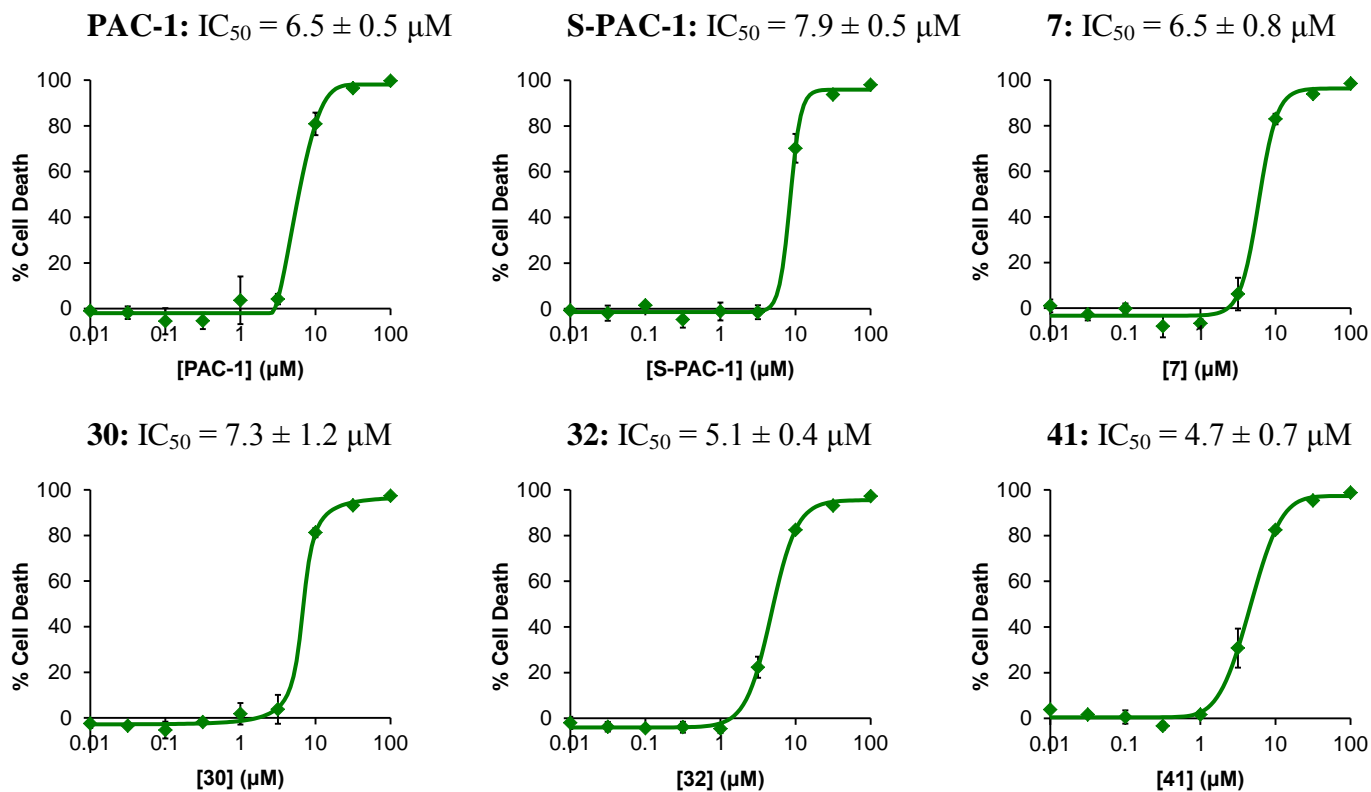

**Figure S6.** EL4 cells treated with compounds for 72 hours. Biomass quantified by sulforhodamine B assay.  $IC_{50}$  values shown are mean  $\pm$  s.e.m. ( $n = 3$ ).

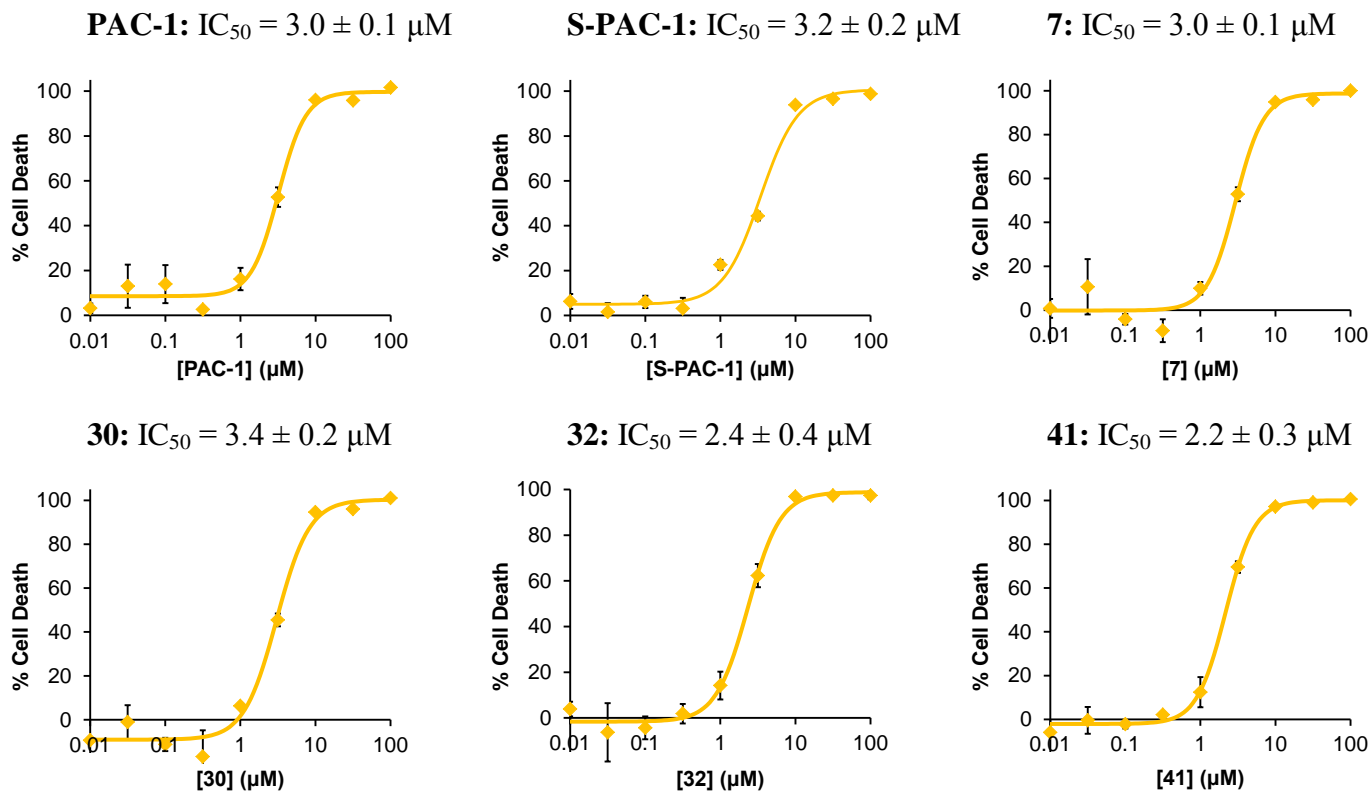

**Figure S7.** GL-1 cells treated with compounds for 72 hours. Biomass quantified by sulforhodamine B assay.  $IC_{50}$  values shown are mean  $\pm$  s.e.m. (n = 3).

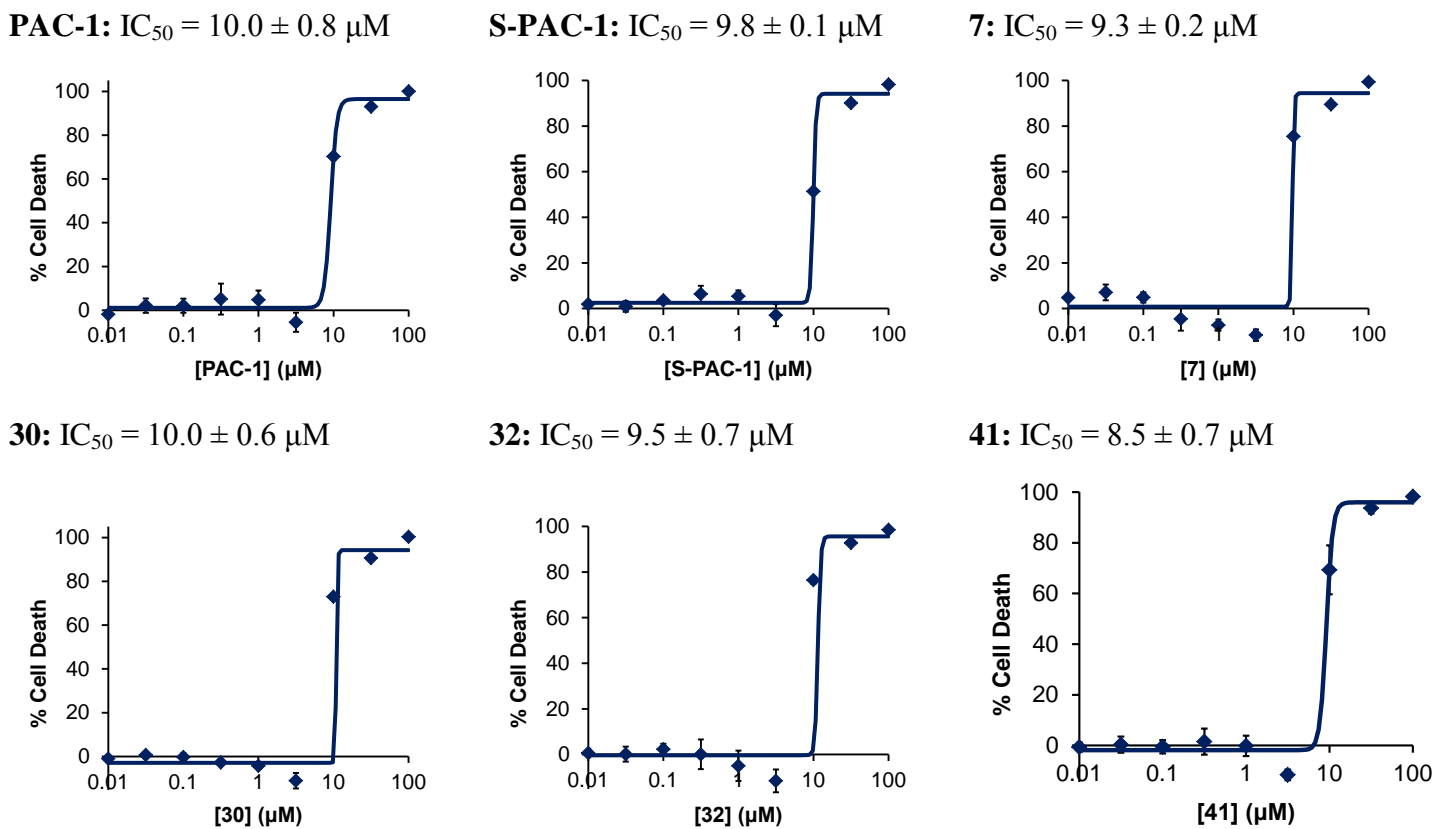

**Figure S8.** OSW cells treated with compounds for 72 hours. Biomass quantified by sulforhodamine B assay.  $IC_{50}$  values shown are mean  $\pm$  s.e.m. (n = 3).

## References

1. Putt, K. S.; Chen, G. W.; Pearson, J. M.; Sandhorst, J. S.; Hoagland, M. S.; Kwon, J. T.; Hwang, S. K.; Jin, H.; Churchwell, M. I.; Cho, M. H.; Doerge, D. R.; Helferich, W. G.; Hergenrother, P. J. Small-molecule activation of procaspase-3 to caspase-3 as a personalized anticancer strategy. *Nat. Chem. Biol.* **2006**, *2*, 543-550.
2. Peterson, Q. P.; Hsu, D. C.; Goode, D. R.; Novotny, C. J.; Totten, R. K.; Hergenrother, P. J. Procaspase-3 activation as an anti-cancer strategy: structure-activity relationship of Procaspase-Activating Compound 1 (PAC-1) and its cellular co-localization with caspase-3. *J. Med. Chem.* **2009**, *52*, 5721-5731.
3. Hsu, D. C.; Roth, H. S.; West, D. C.; Botham, R. C.; Novotny, C. J.; Schmid, S. C.; Hergenrother, P. J. Parallel synthesis and biological evaluation of 837 analogues of Procaspase-Activating Compound 1 (PAC-1). *ACS Comb. Sci.* **2012**, *14*, 44-50.
4. Patel, V.; Balakrishnan, K.; Keating, M. J.; Wierda, W. G.; Gandhi, V. Expression of executioner procaspases and their activation by a procaspase activating compound in chronic lymphocytic leukemia cells. *Blood* **2015**, *125*, 1126-1136.
5. Vichai, V.; Kirtikara, K. Sulforhodamine B colorimetric assay for cytotoxicity screening. *Nat. Protoc.* **2006**, *1*, 1112-1116.
6. Huang, S.; Clark, R. J.; Zhu, L. Highly sensitive fluorescent probes for zinc ion based on triazolyl-containing tetradentate coordination motifs. *Org. Lett.* **2007**, *9*, 4999-5002.

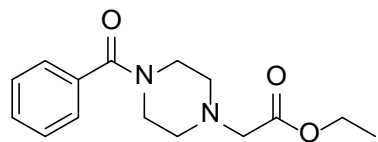

**51c**  
 $^1\text{H-NMR}$   
(500 MHz,  $\text{CDCl}_3$ )

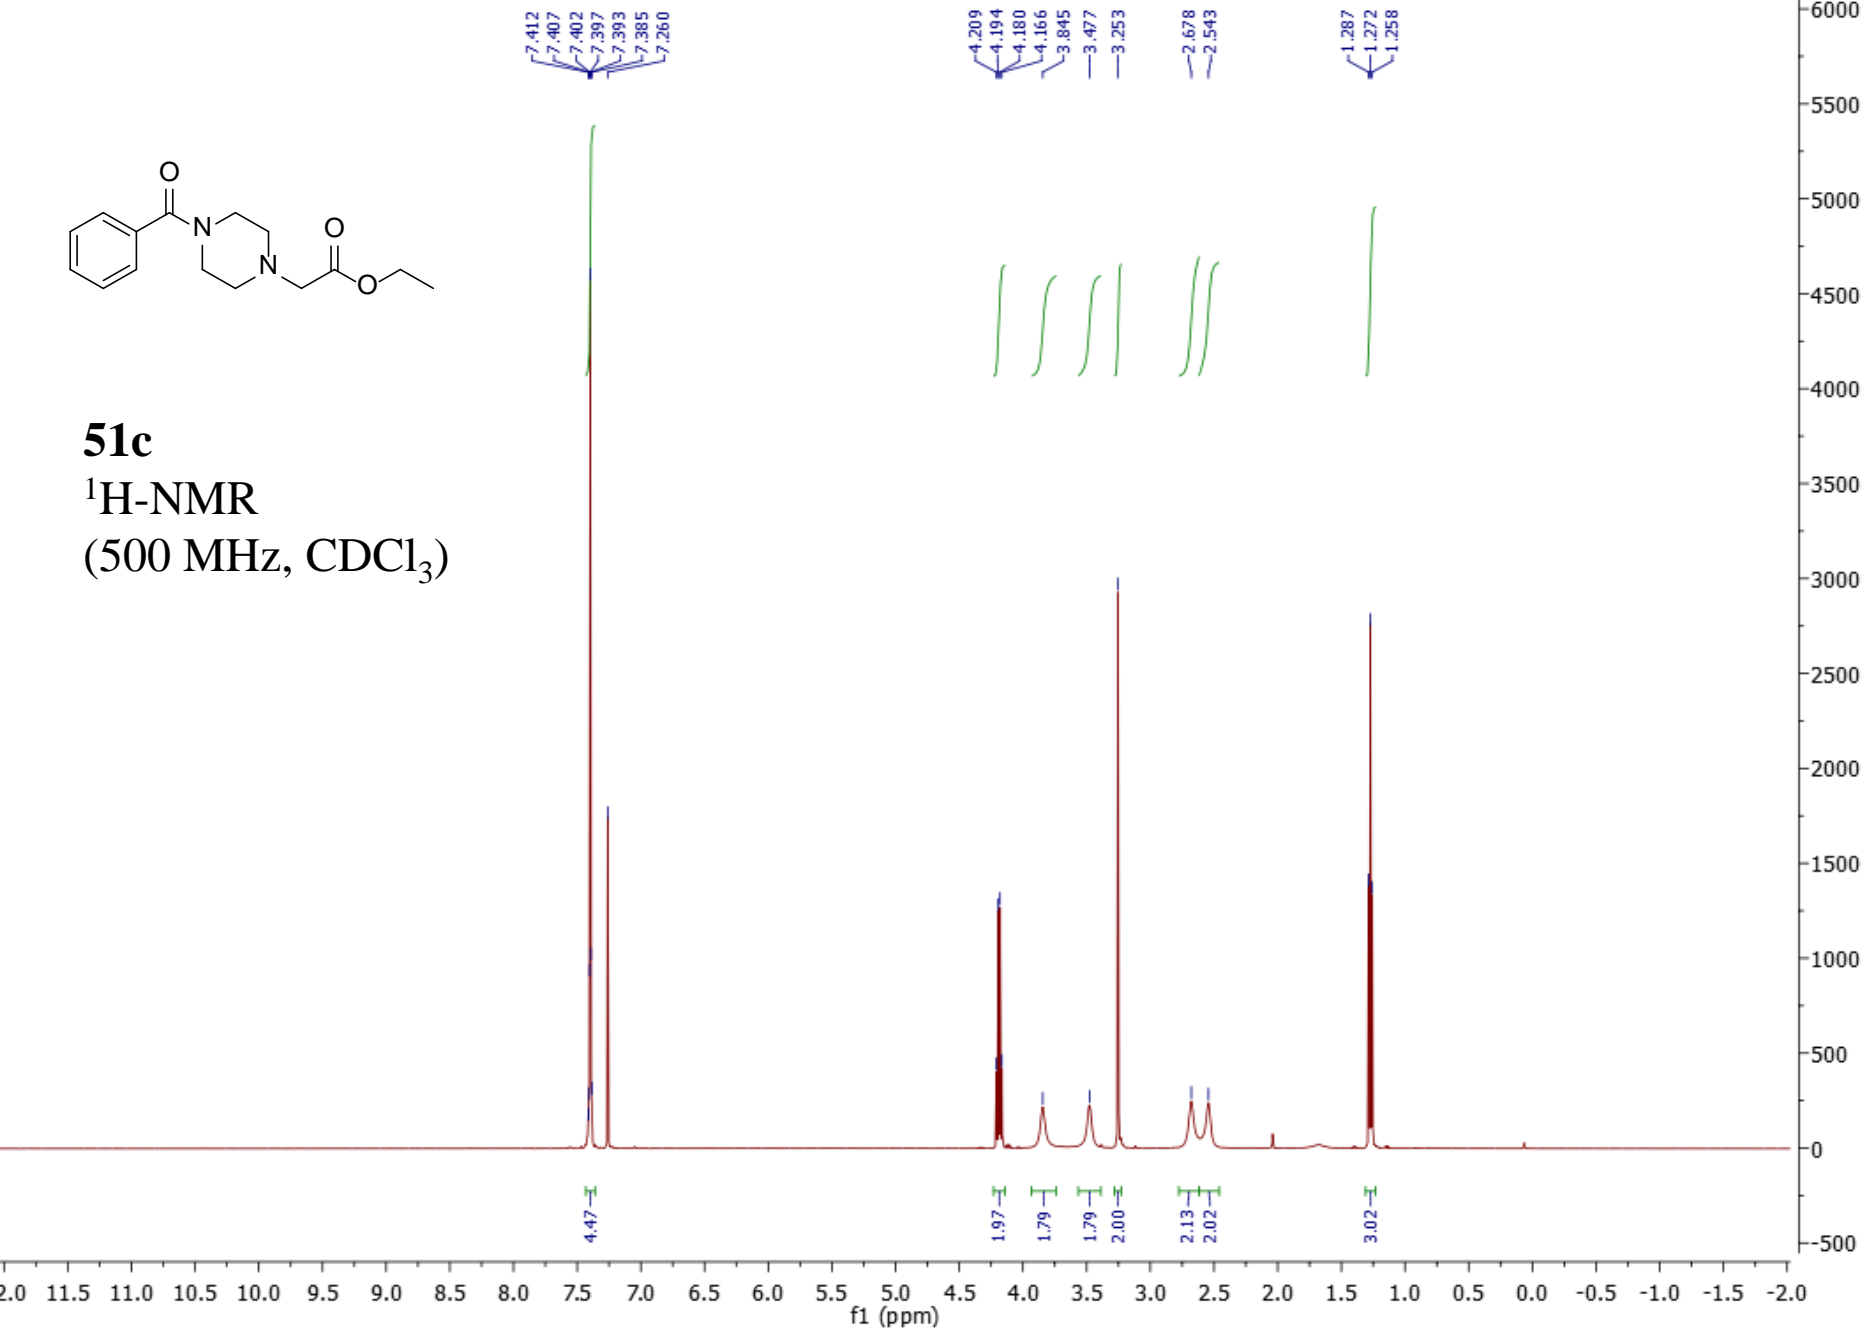



**51c**  
 $^{13}\text{C}$ -NMR  
(125 MHz,  $\text{CDCl}_3$ )

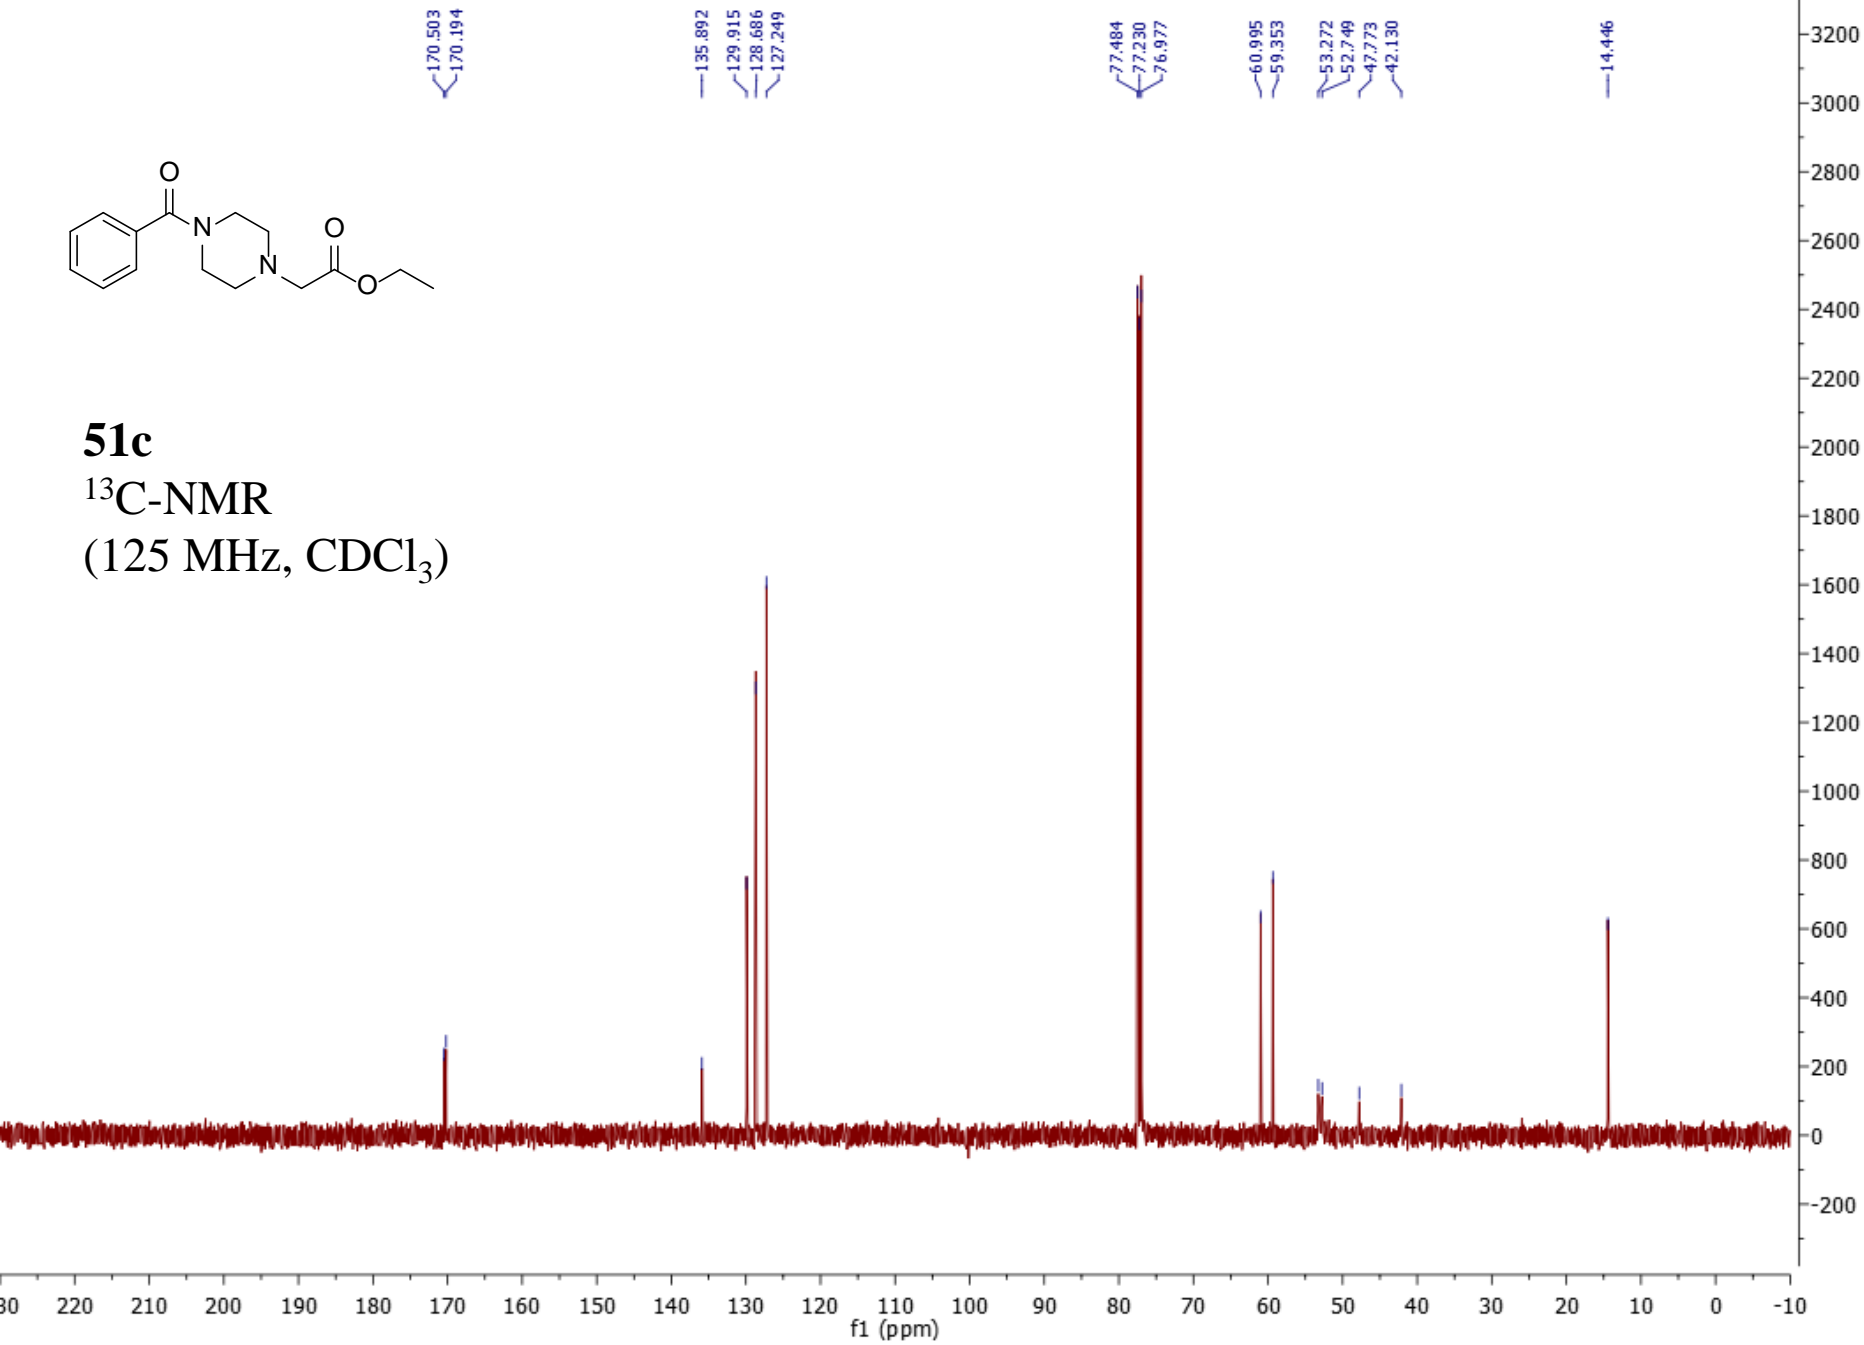

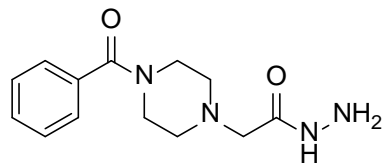

**46c**

<sup>1</sup>H-NMR

(500 MHz, CDCl<sub>3</sub>)

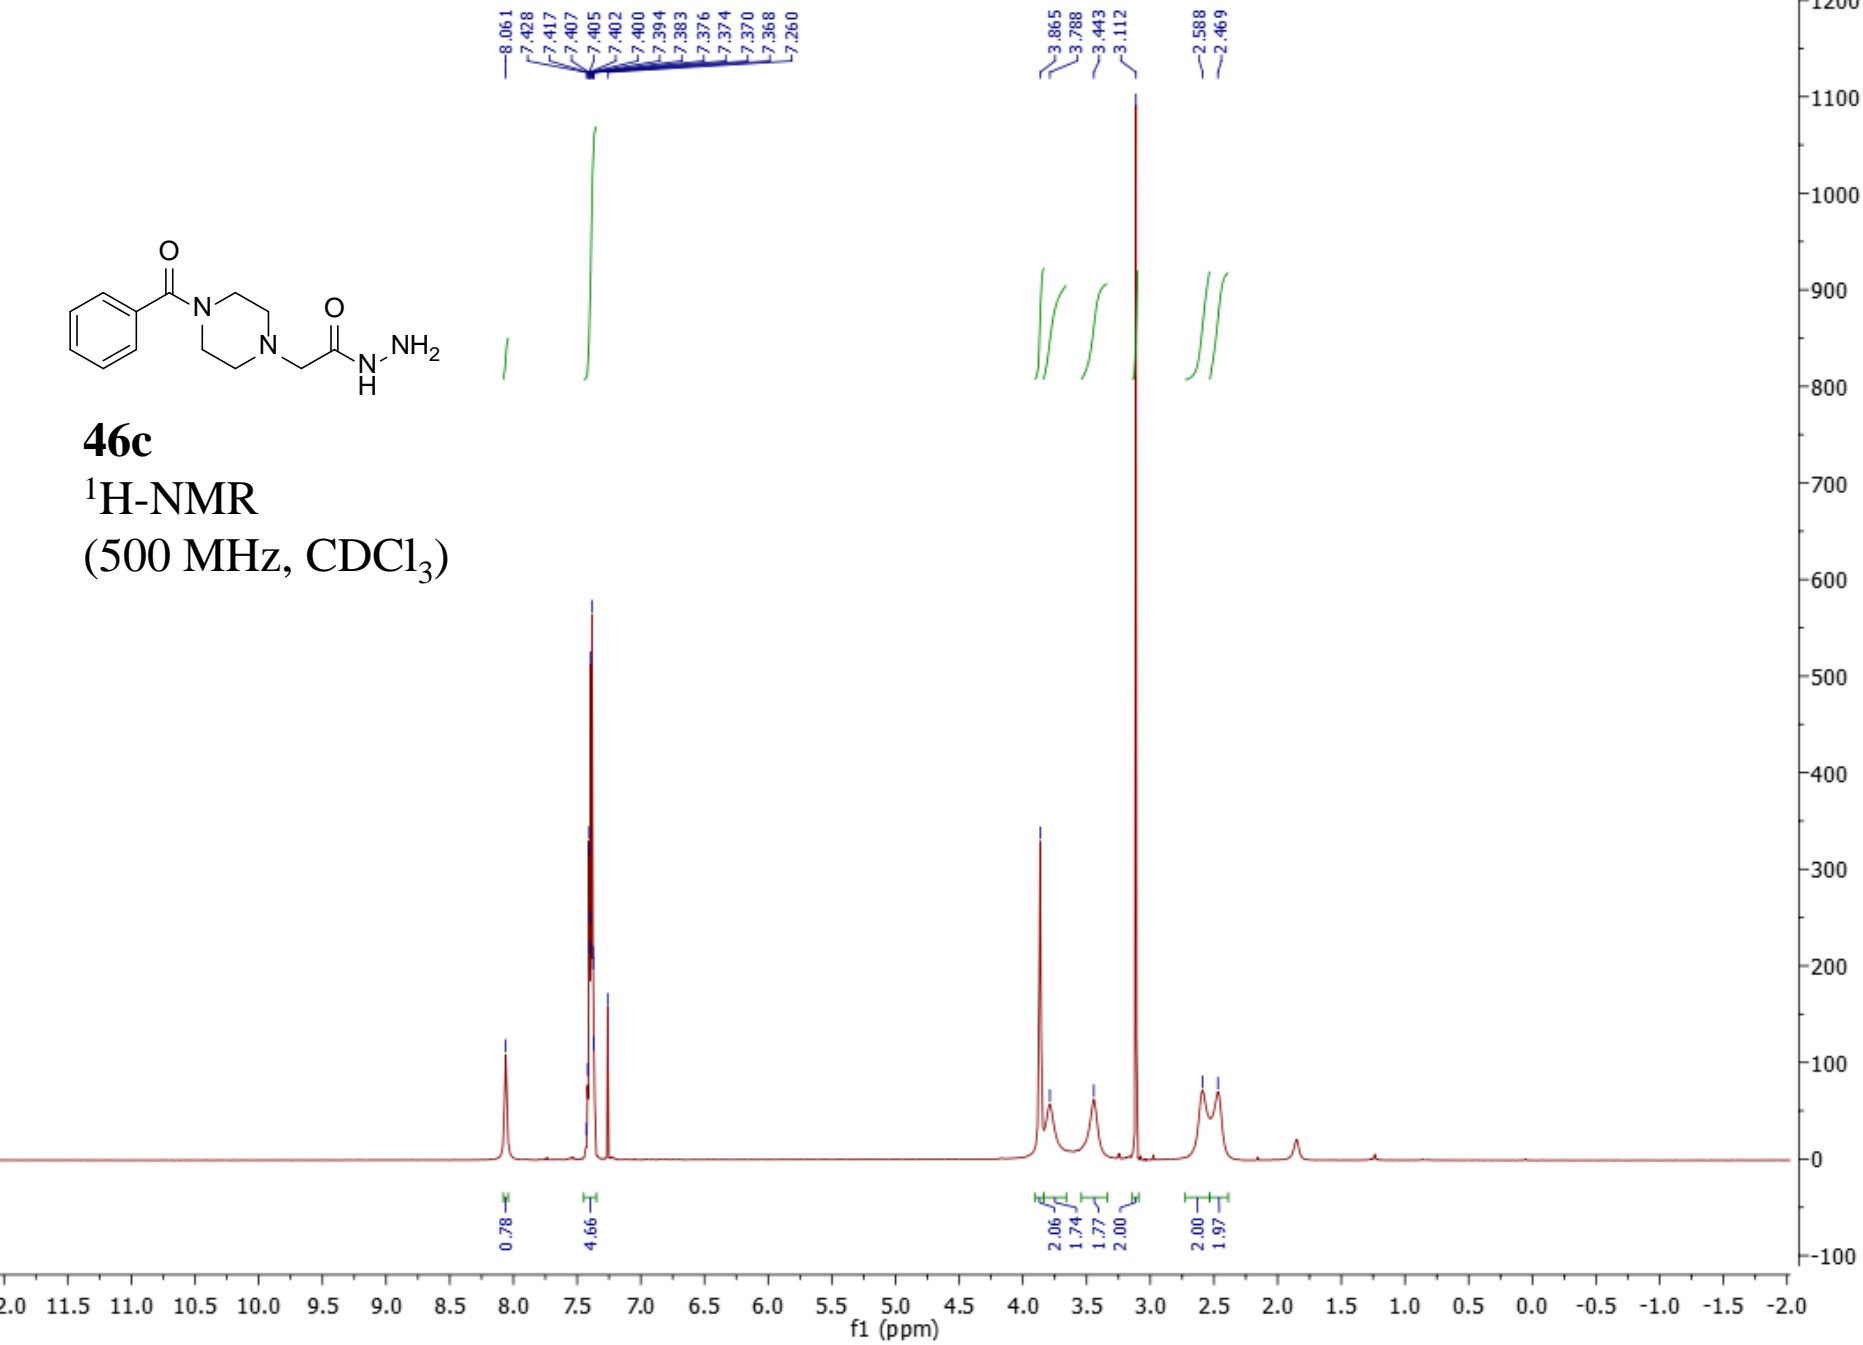



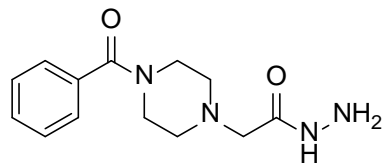

**46c**  
 $^{13}\text{C}$ -NMR  
(125 MHz,  $\text{CDCl}_3$ )

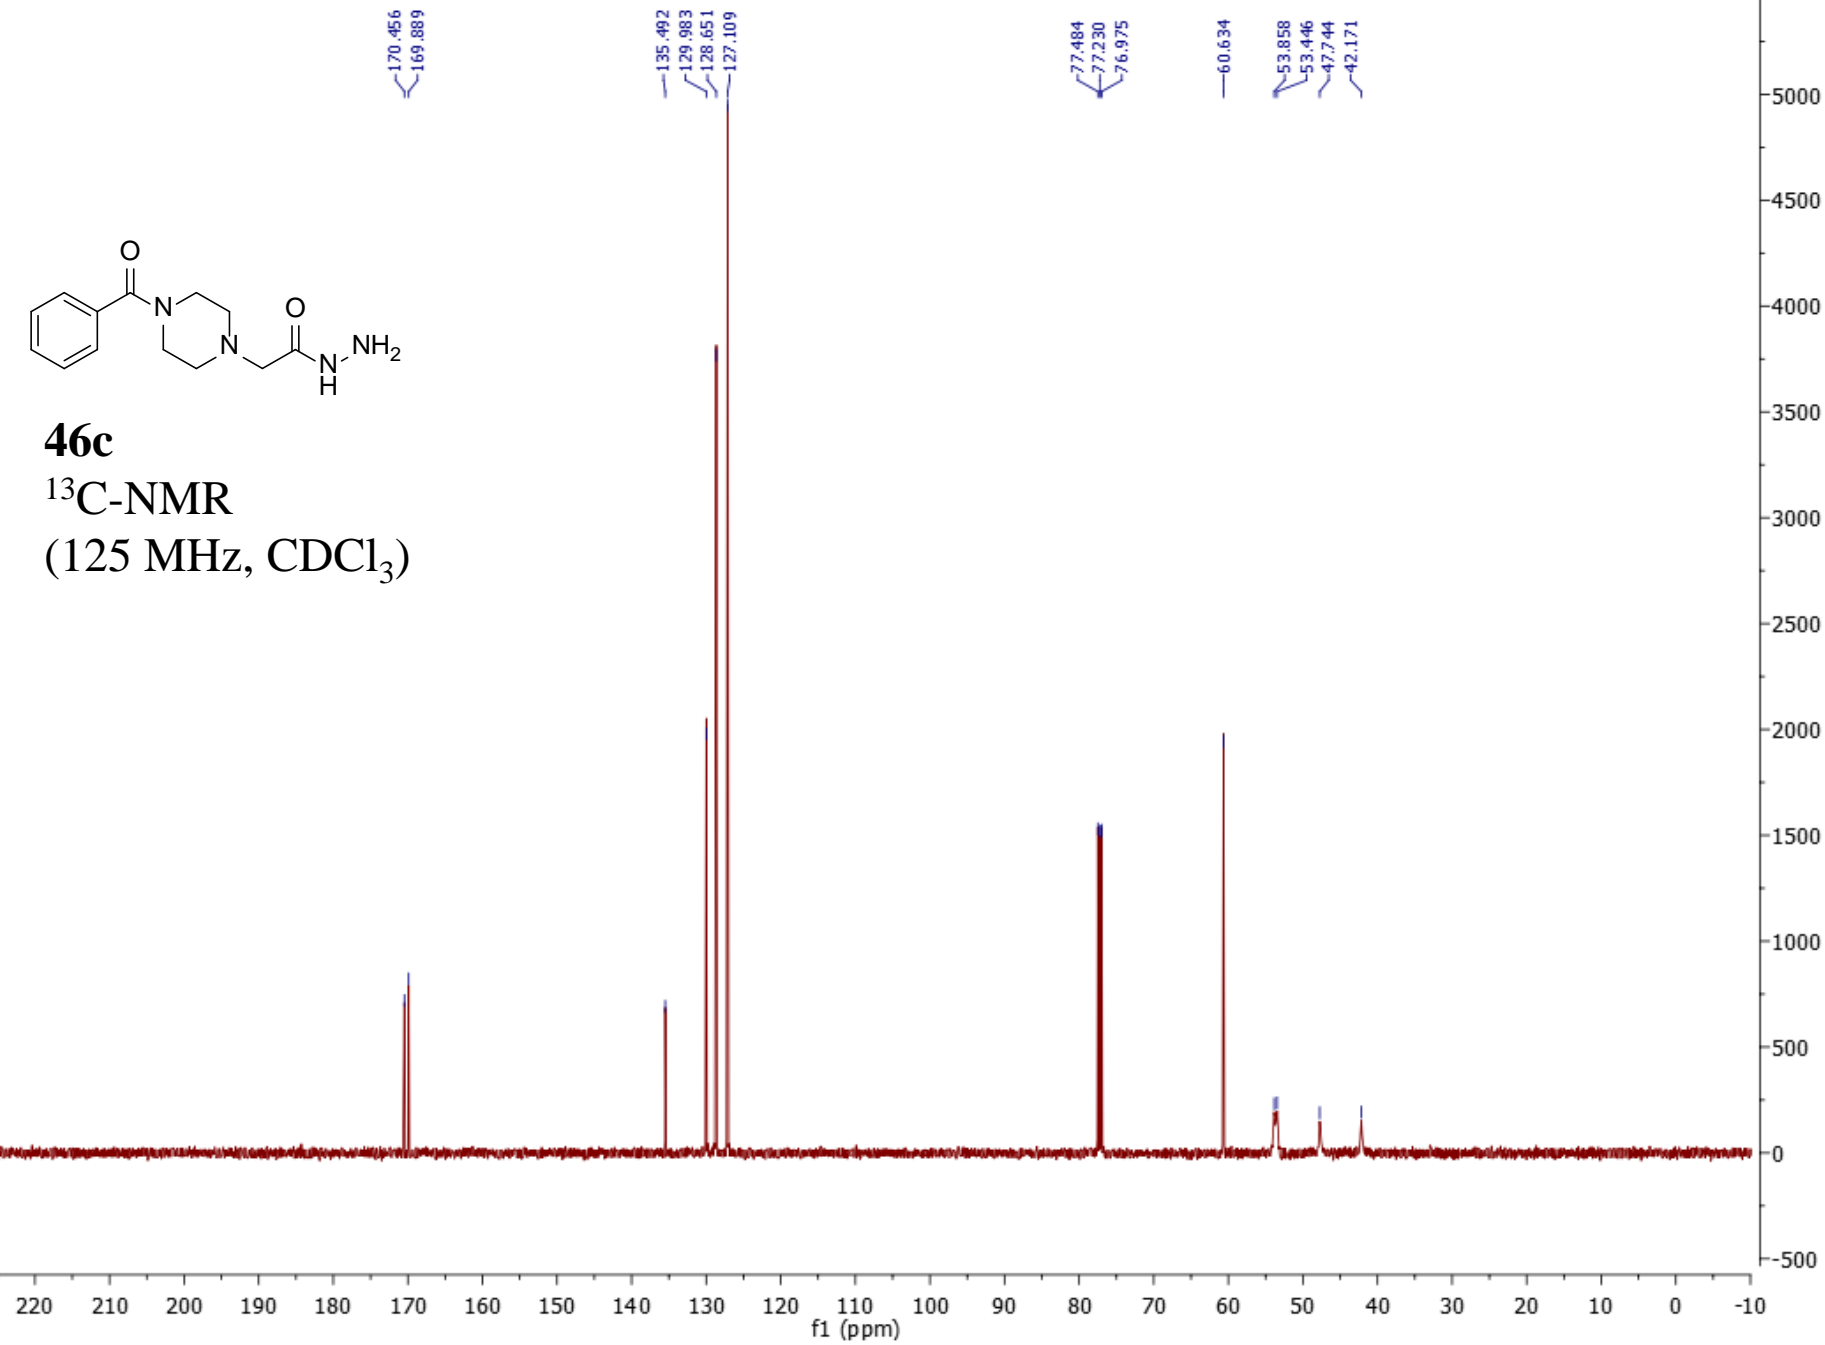

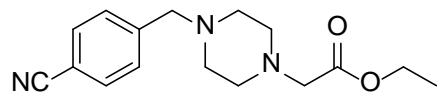

**51d**

$^1\text{H-NMR}$   
(500 MHz,  $\text{CDCl}_3$ )

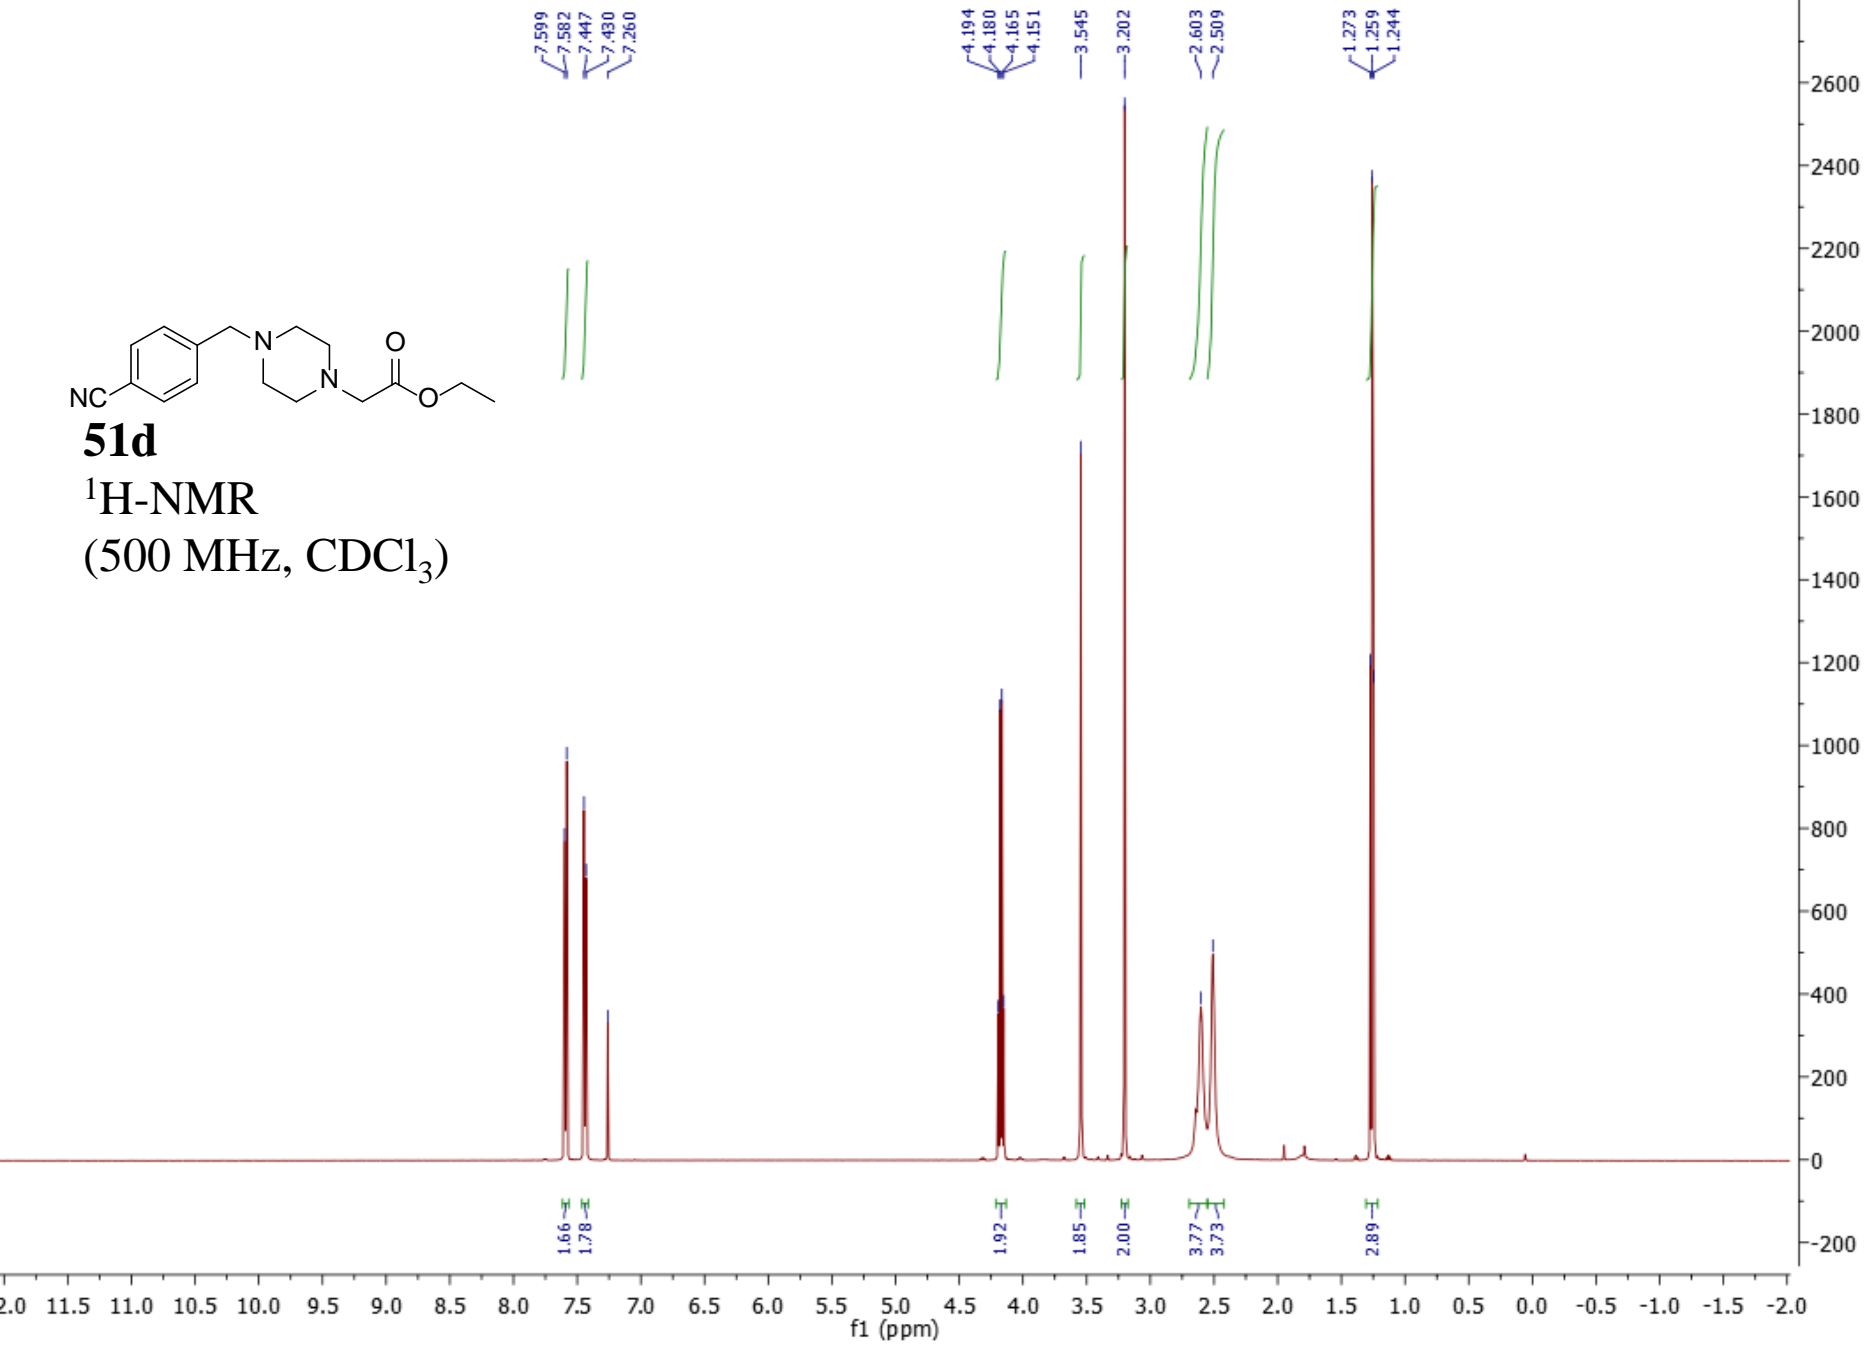

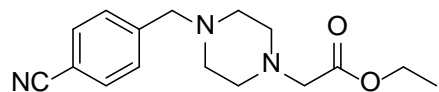

**51d**

$^{13}\text{C}$ -NMR

(125 MHz,  $\text{CDCl}_3$ )

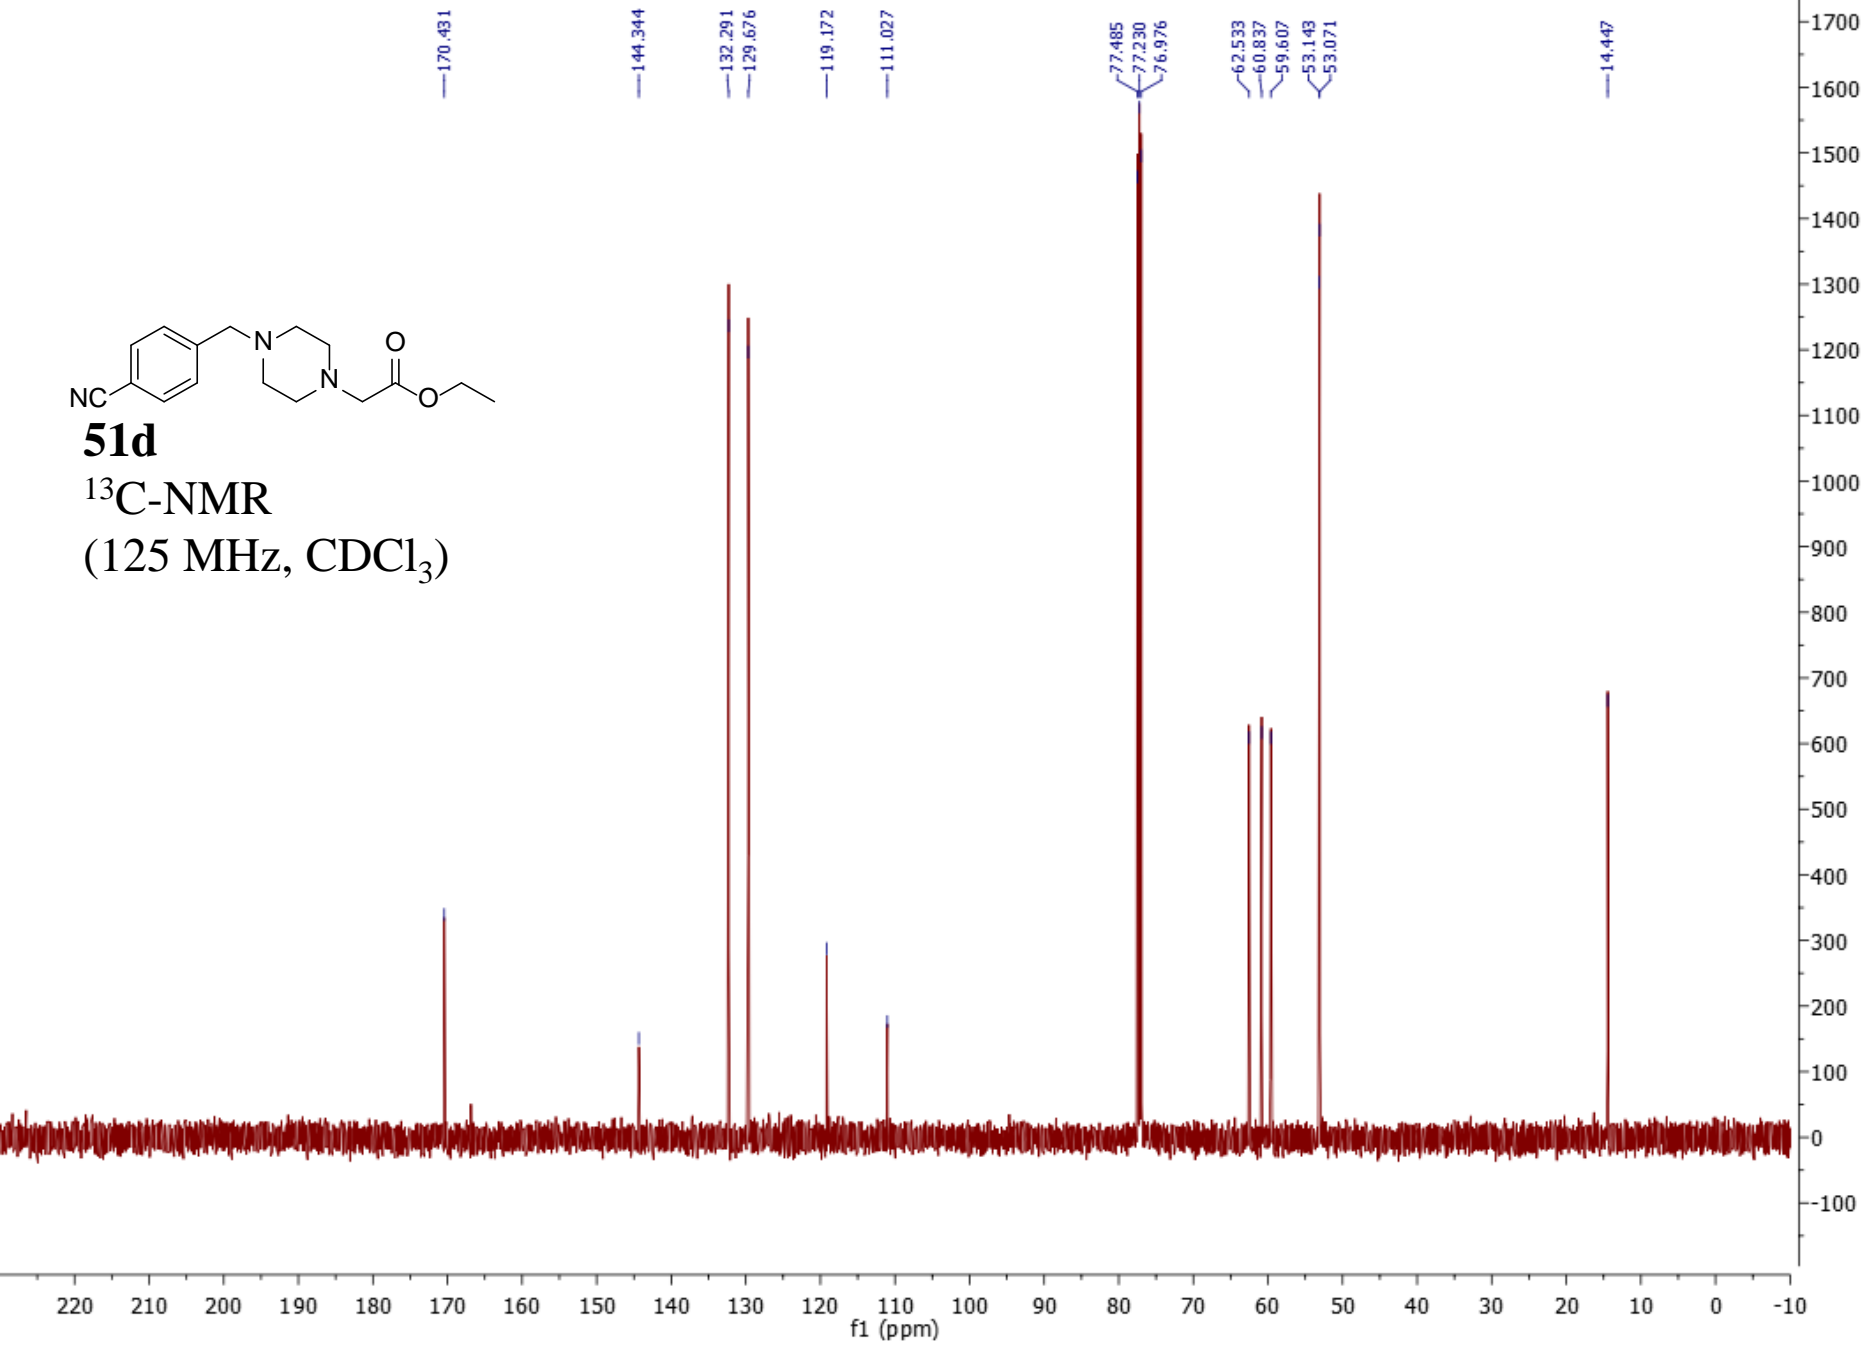

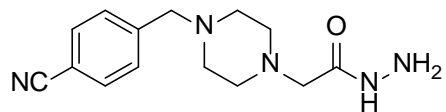

**46d**  
<sup>1</sup>H-NMR  
(500 MHz, CDCl<sub>3</sub>)

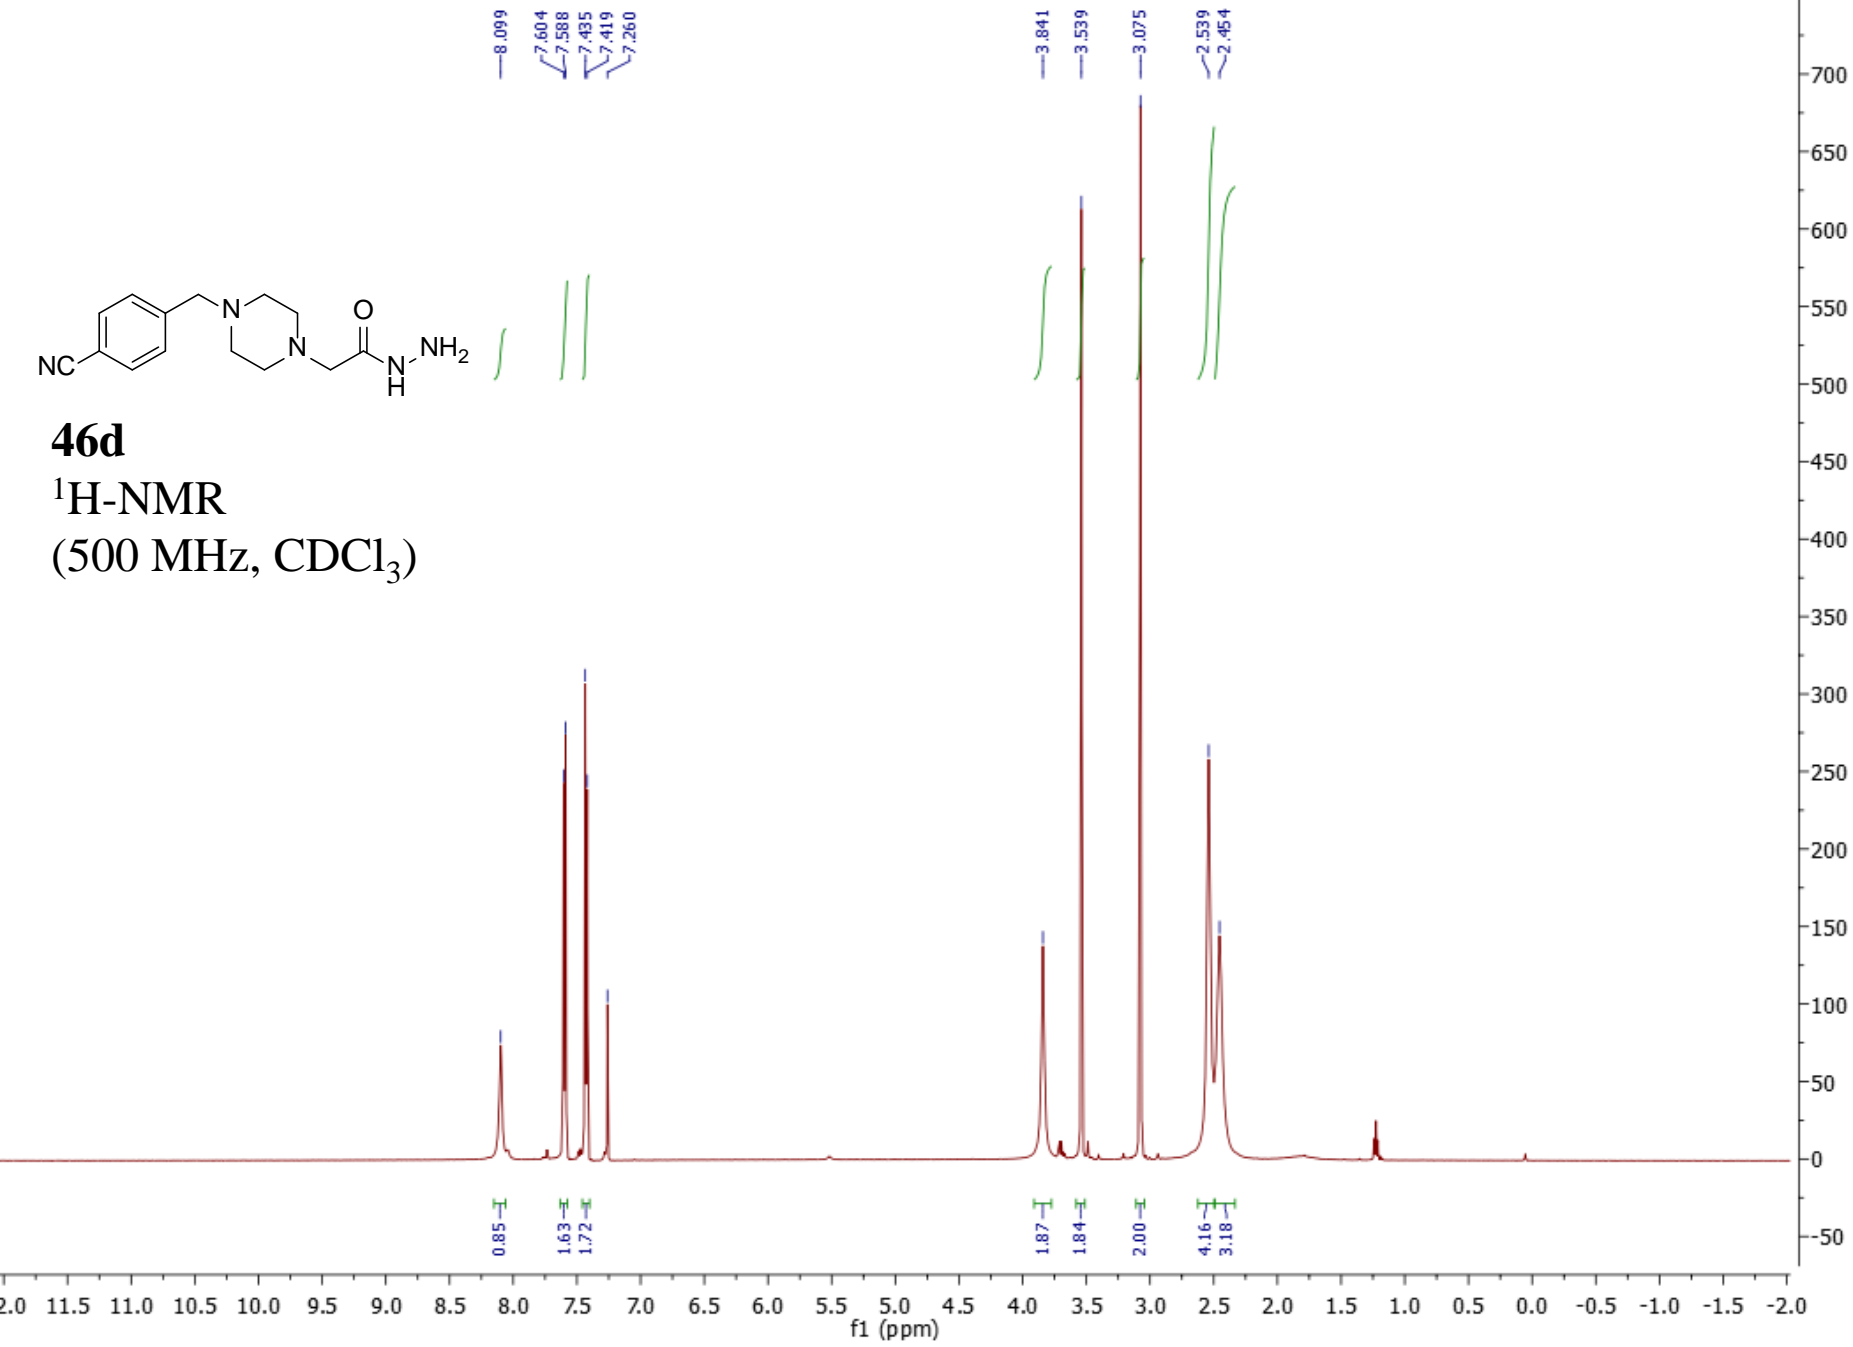

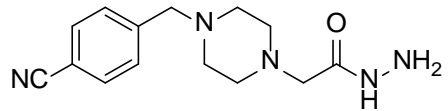

**46d**

$^{13}\text{C}$ -NMR

(125 MHz,  $\text{CDCl}_3$ )

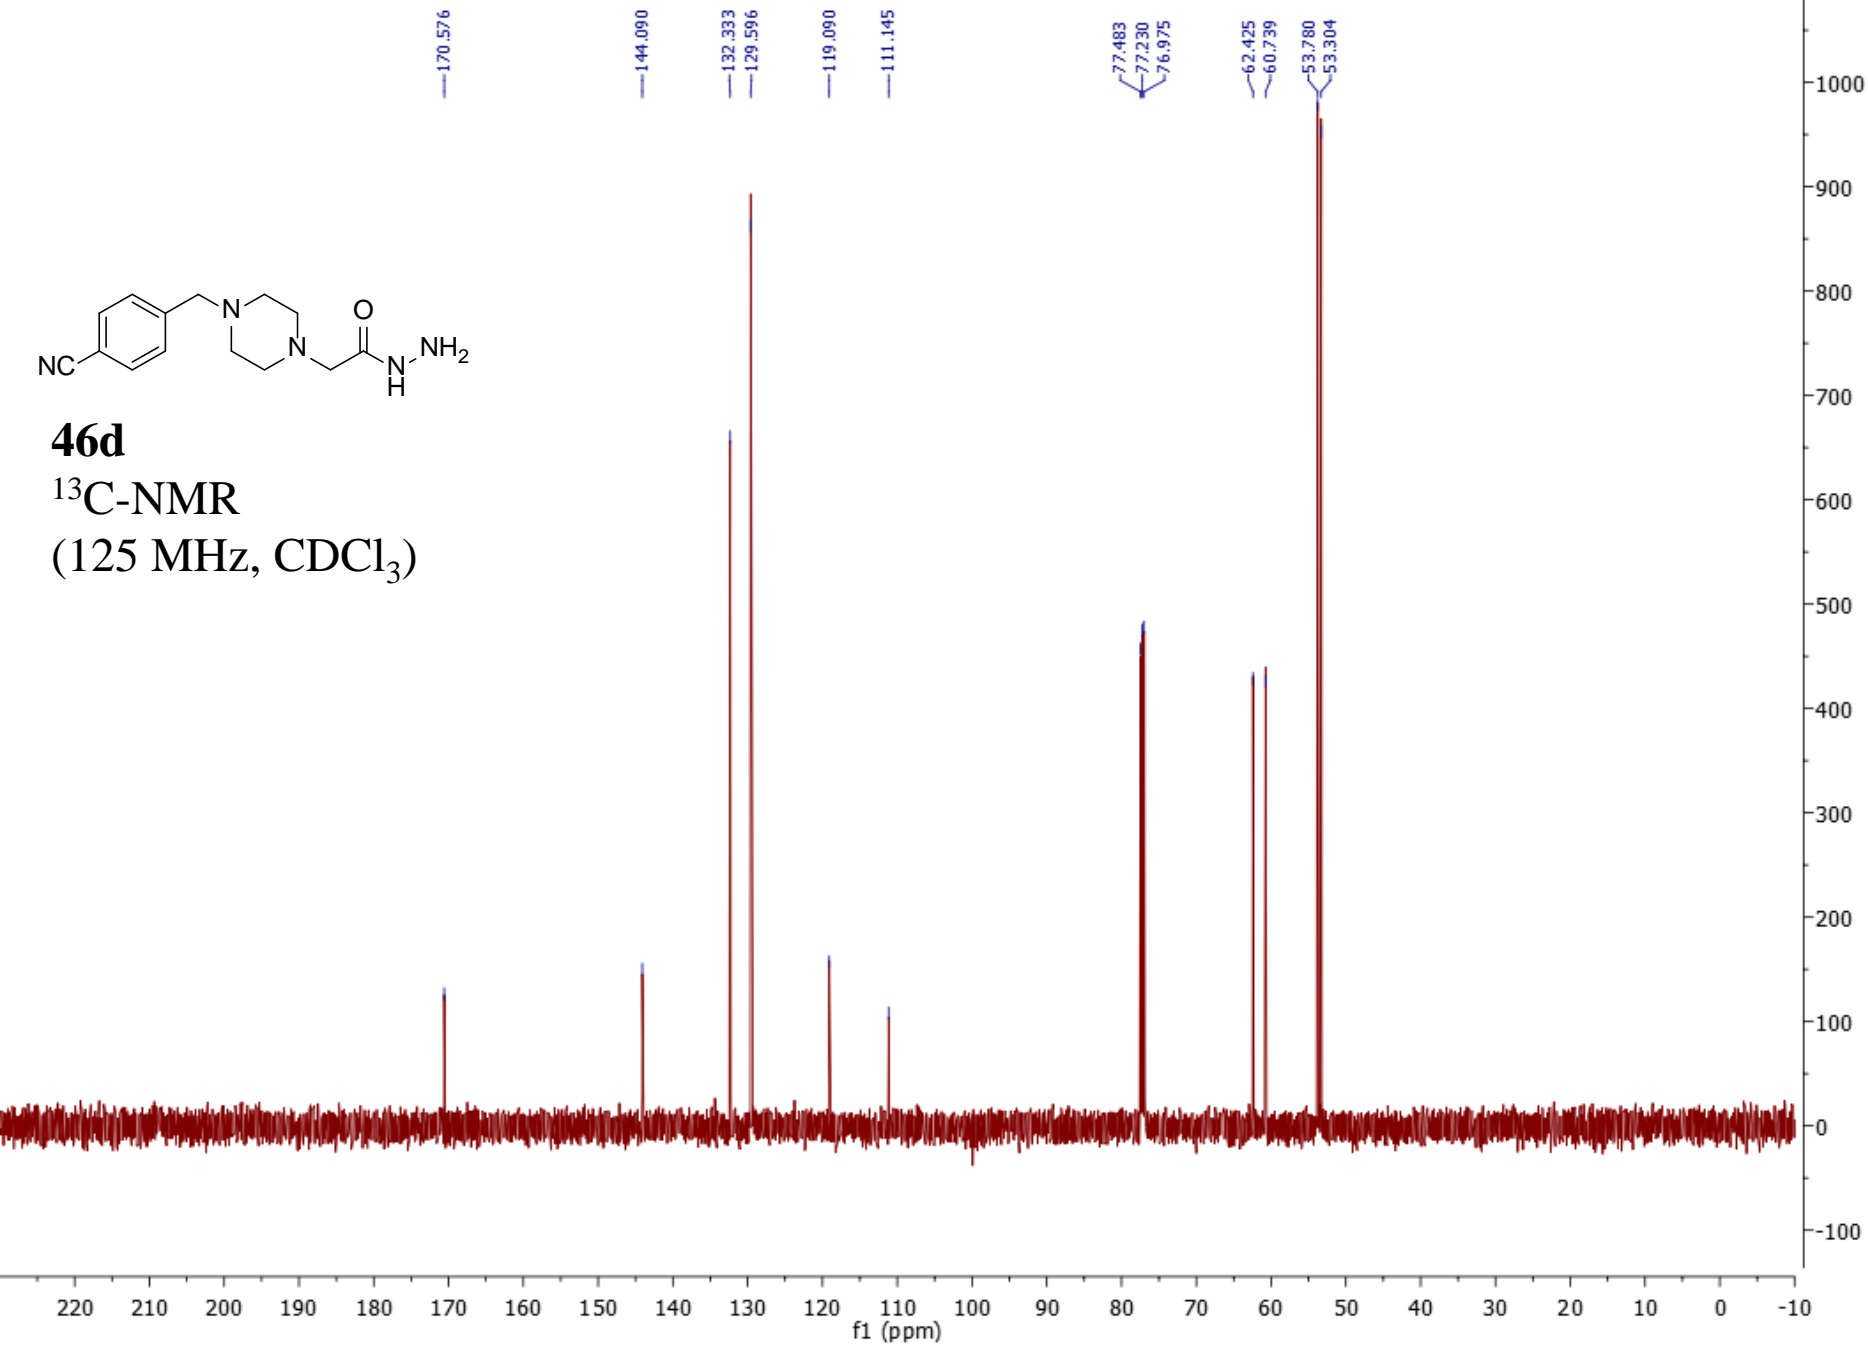

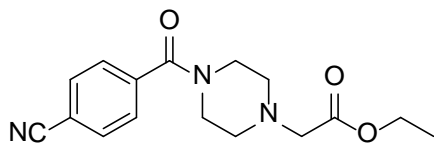

**51e**

<sup>1</sup>H-NMR

(500 MHz, CDCl<sub>3</sub>)

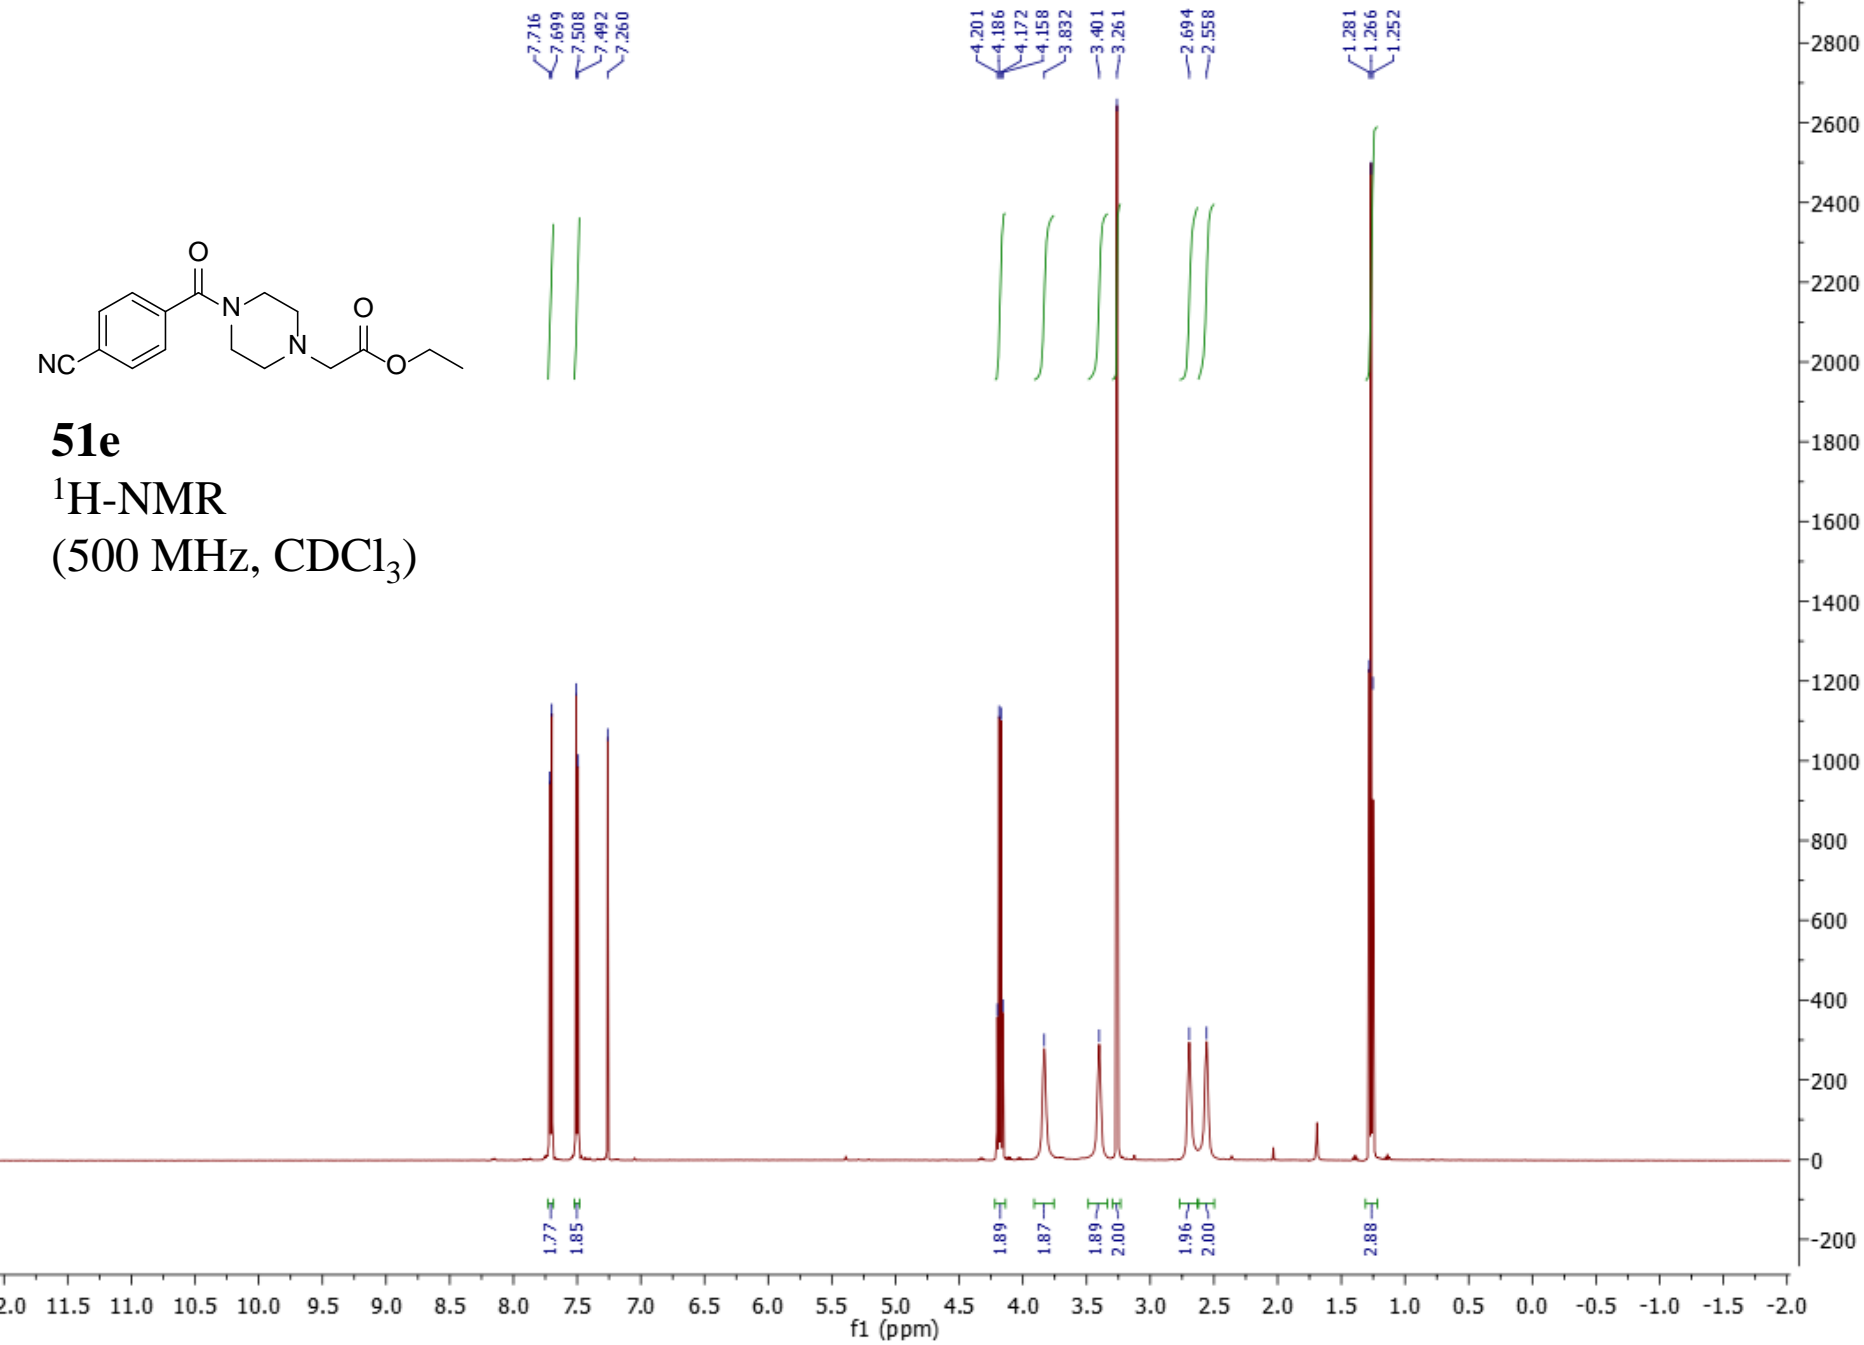

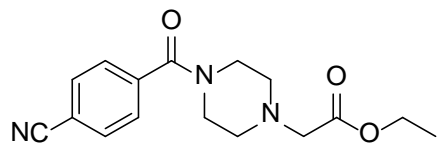

**51e**  
 $^{13}\text{C}$ -NMR  
(125 MHz,  $\text{CDCl}_3$ )

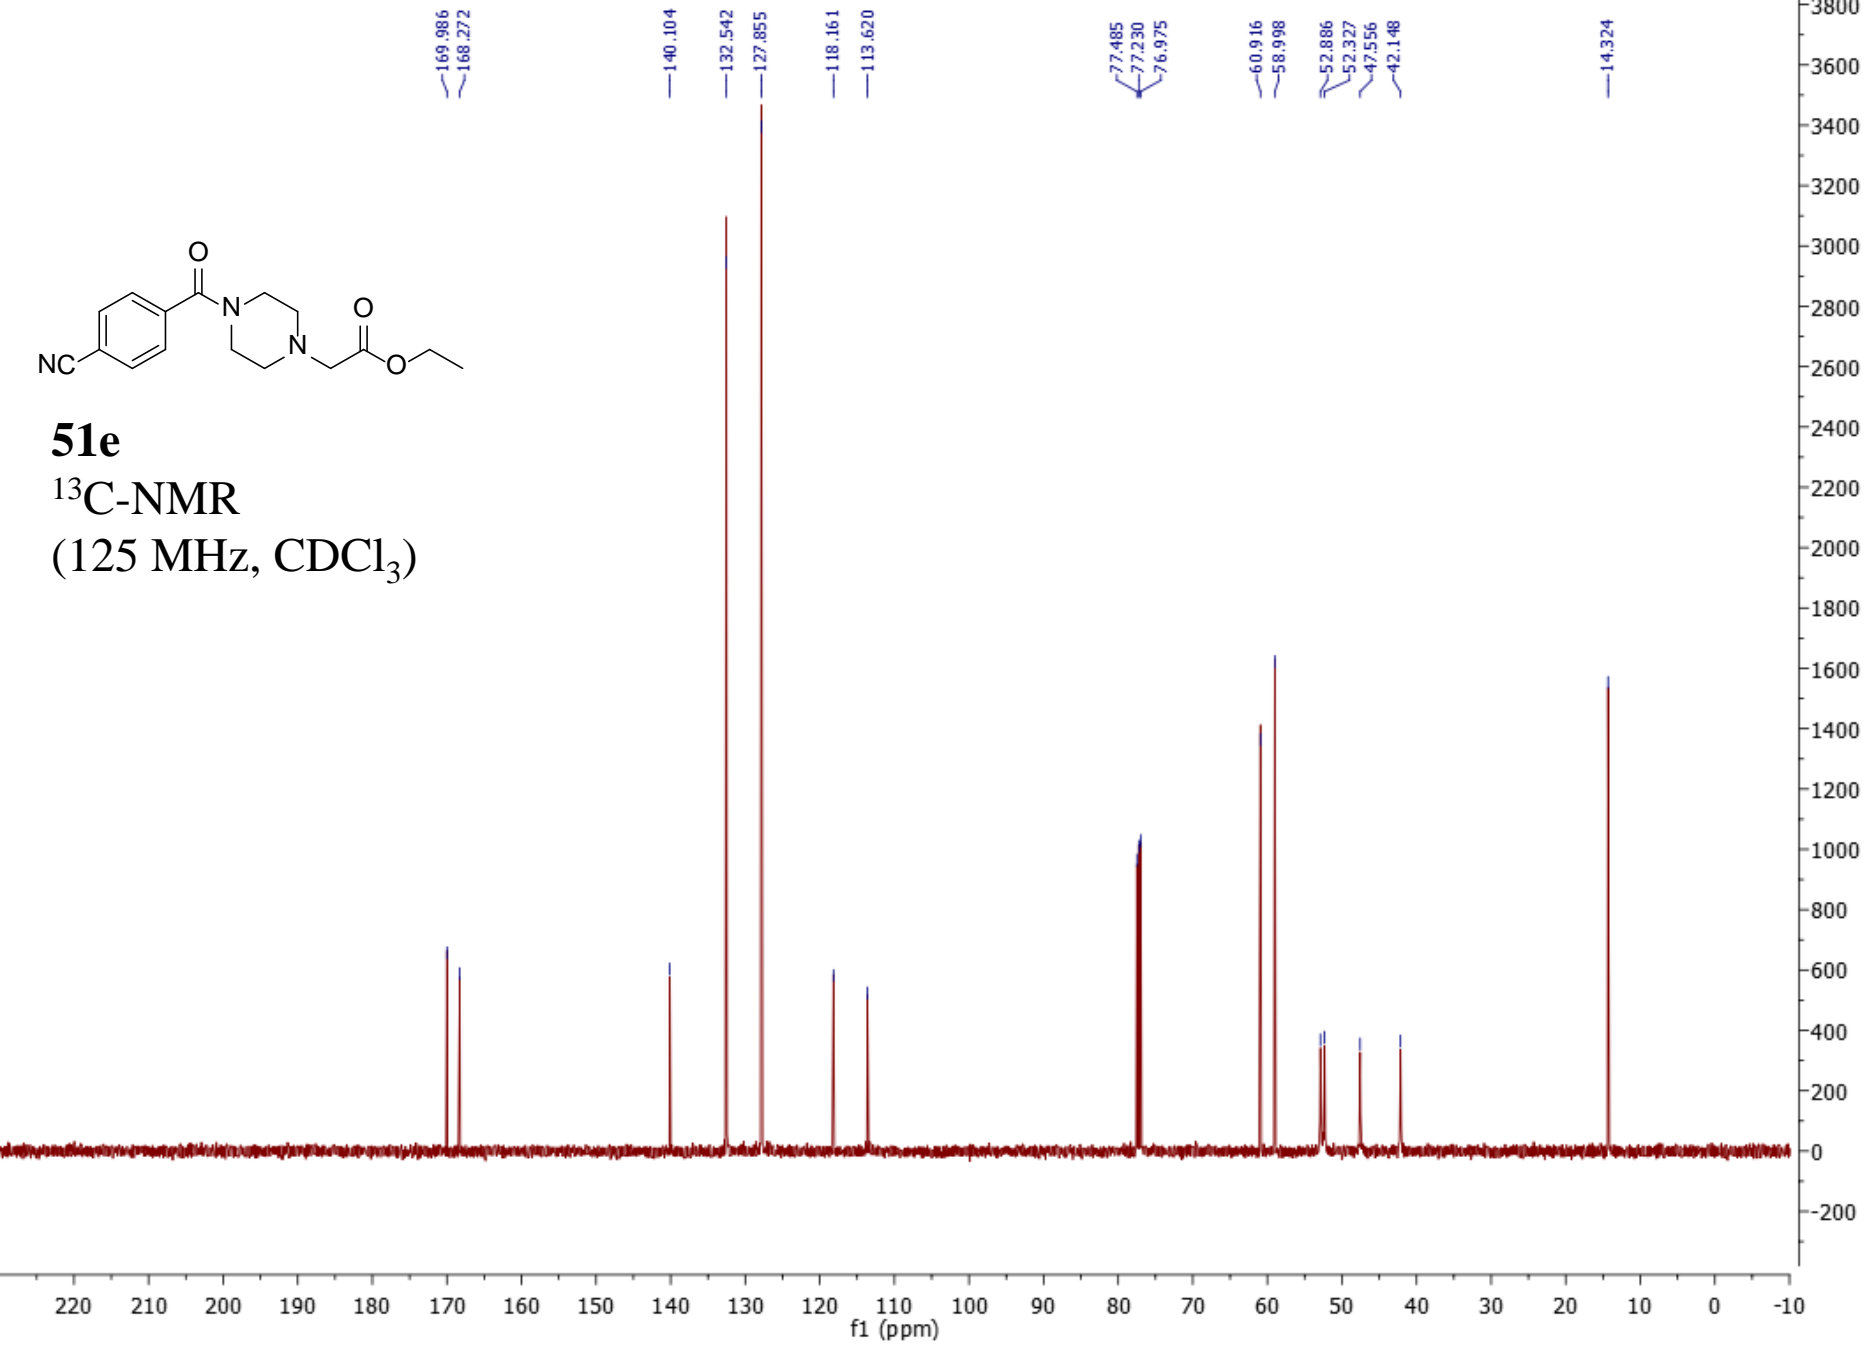

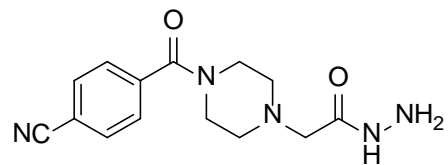

**46e**

<sup>1</sup>H-NMR  
(500 MHz, CDCl<sub>3</sub>)

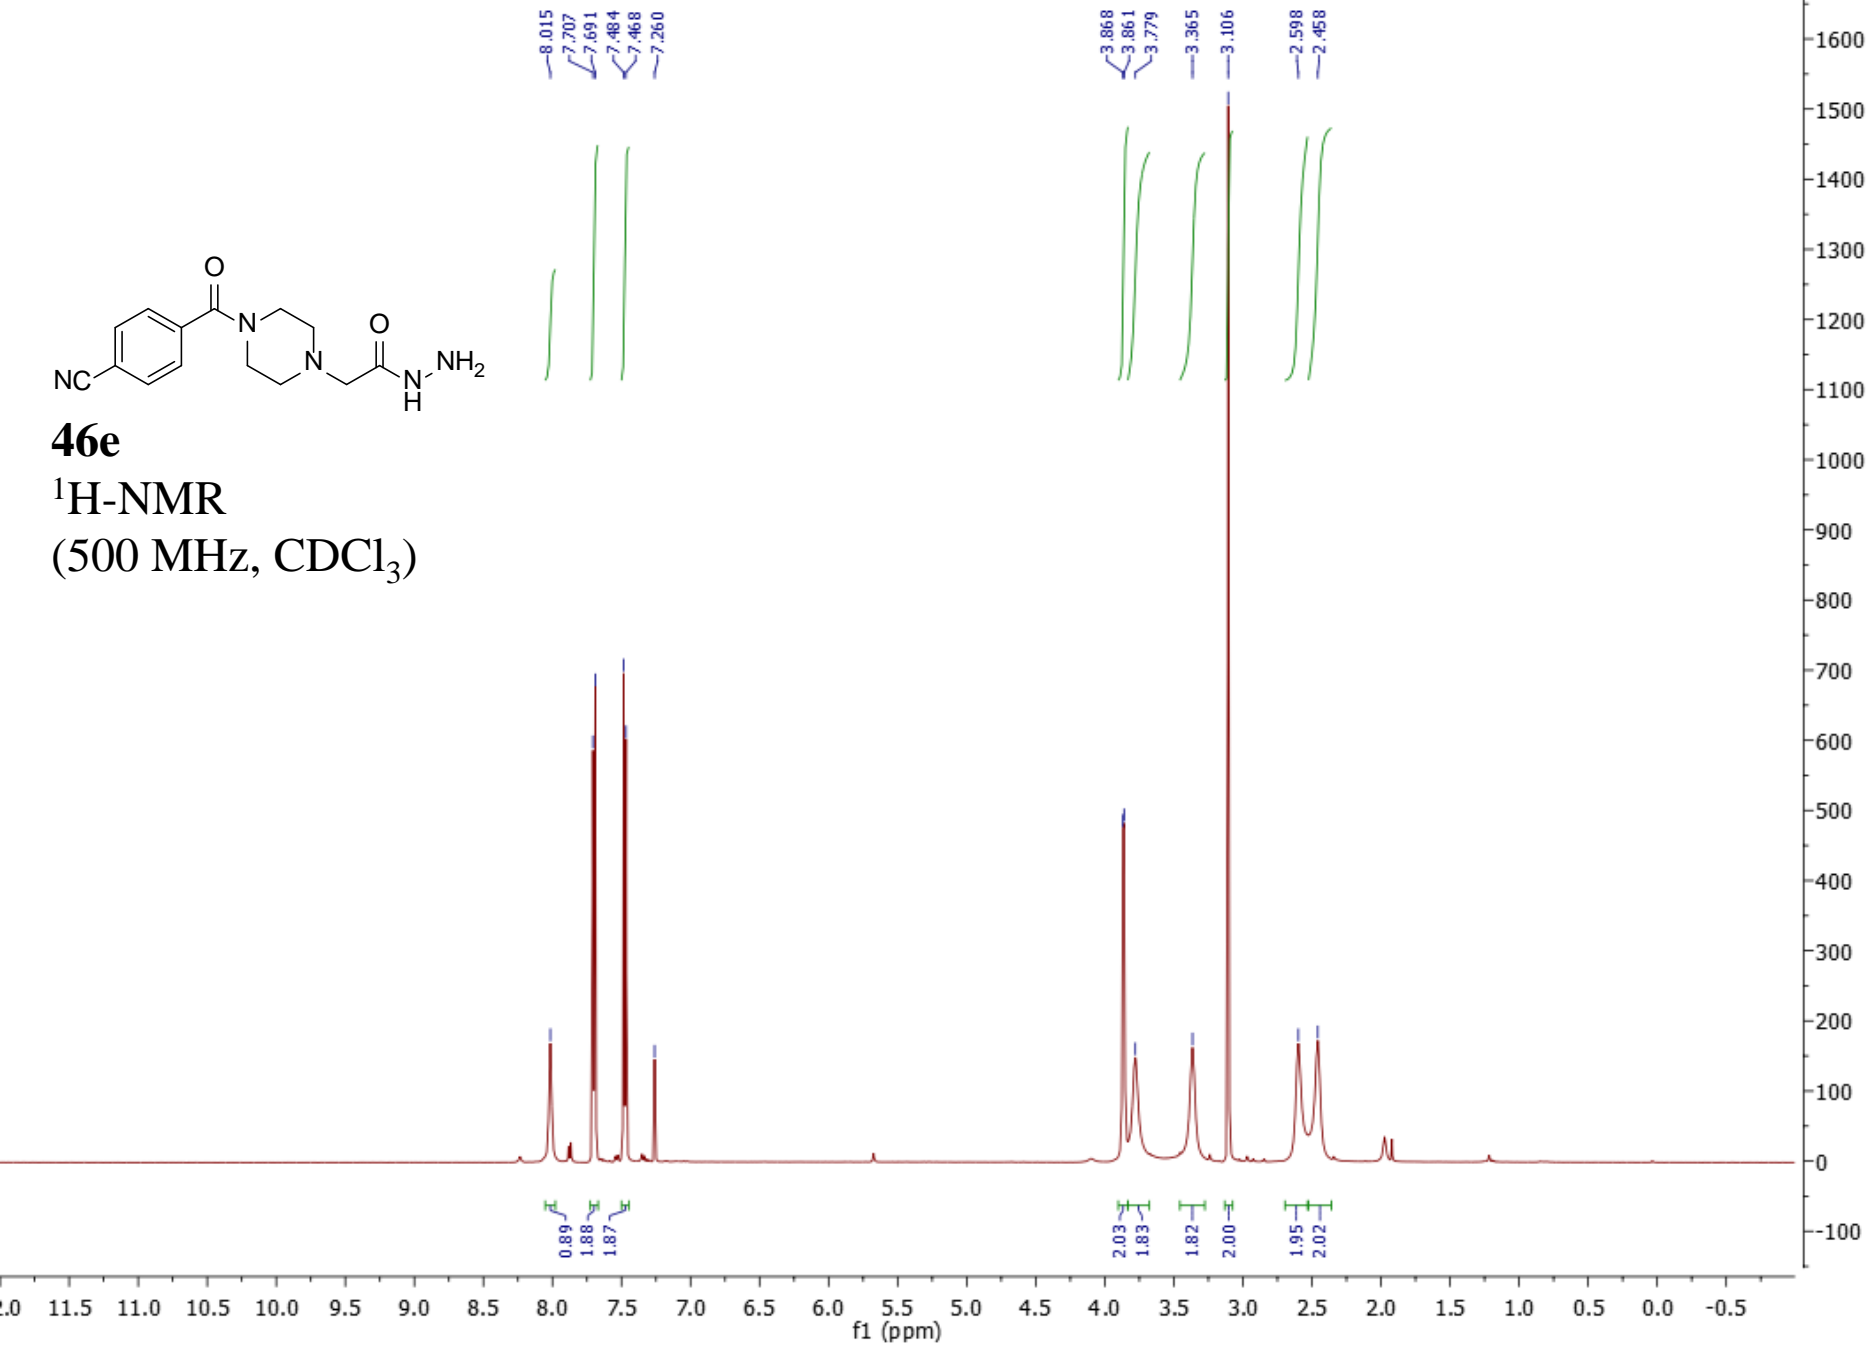



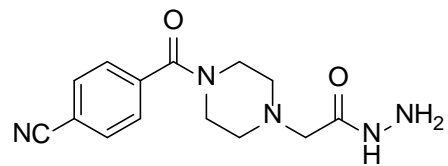

**46e**

$^{13}\text{C}$ -NMR

(125 MHz,  $\text{CDCl}_3$ )

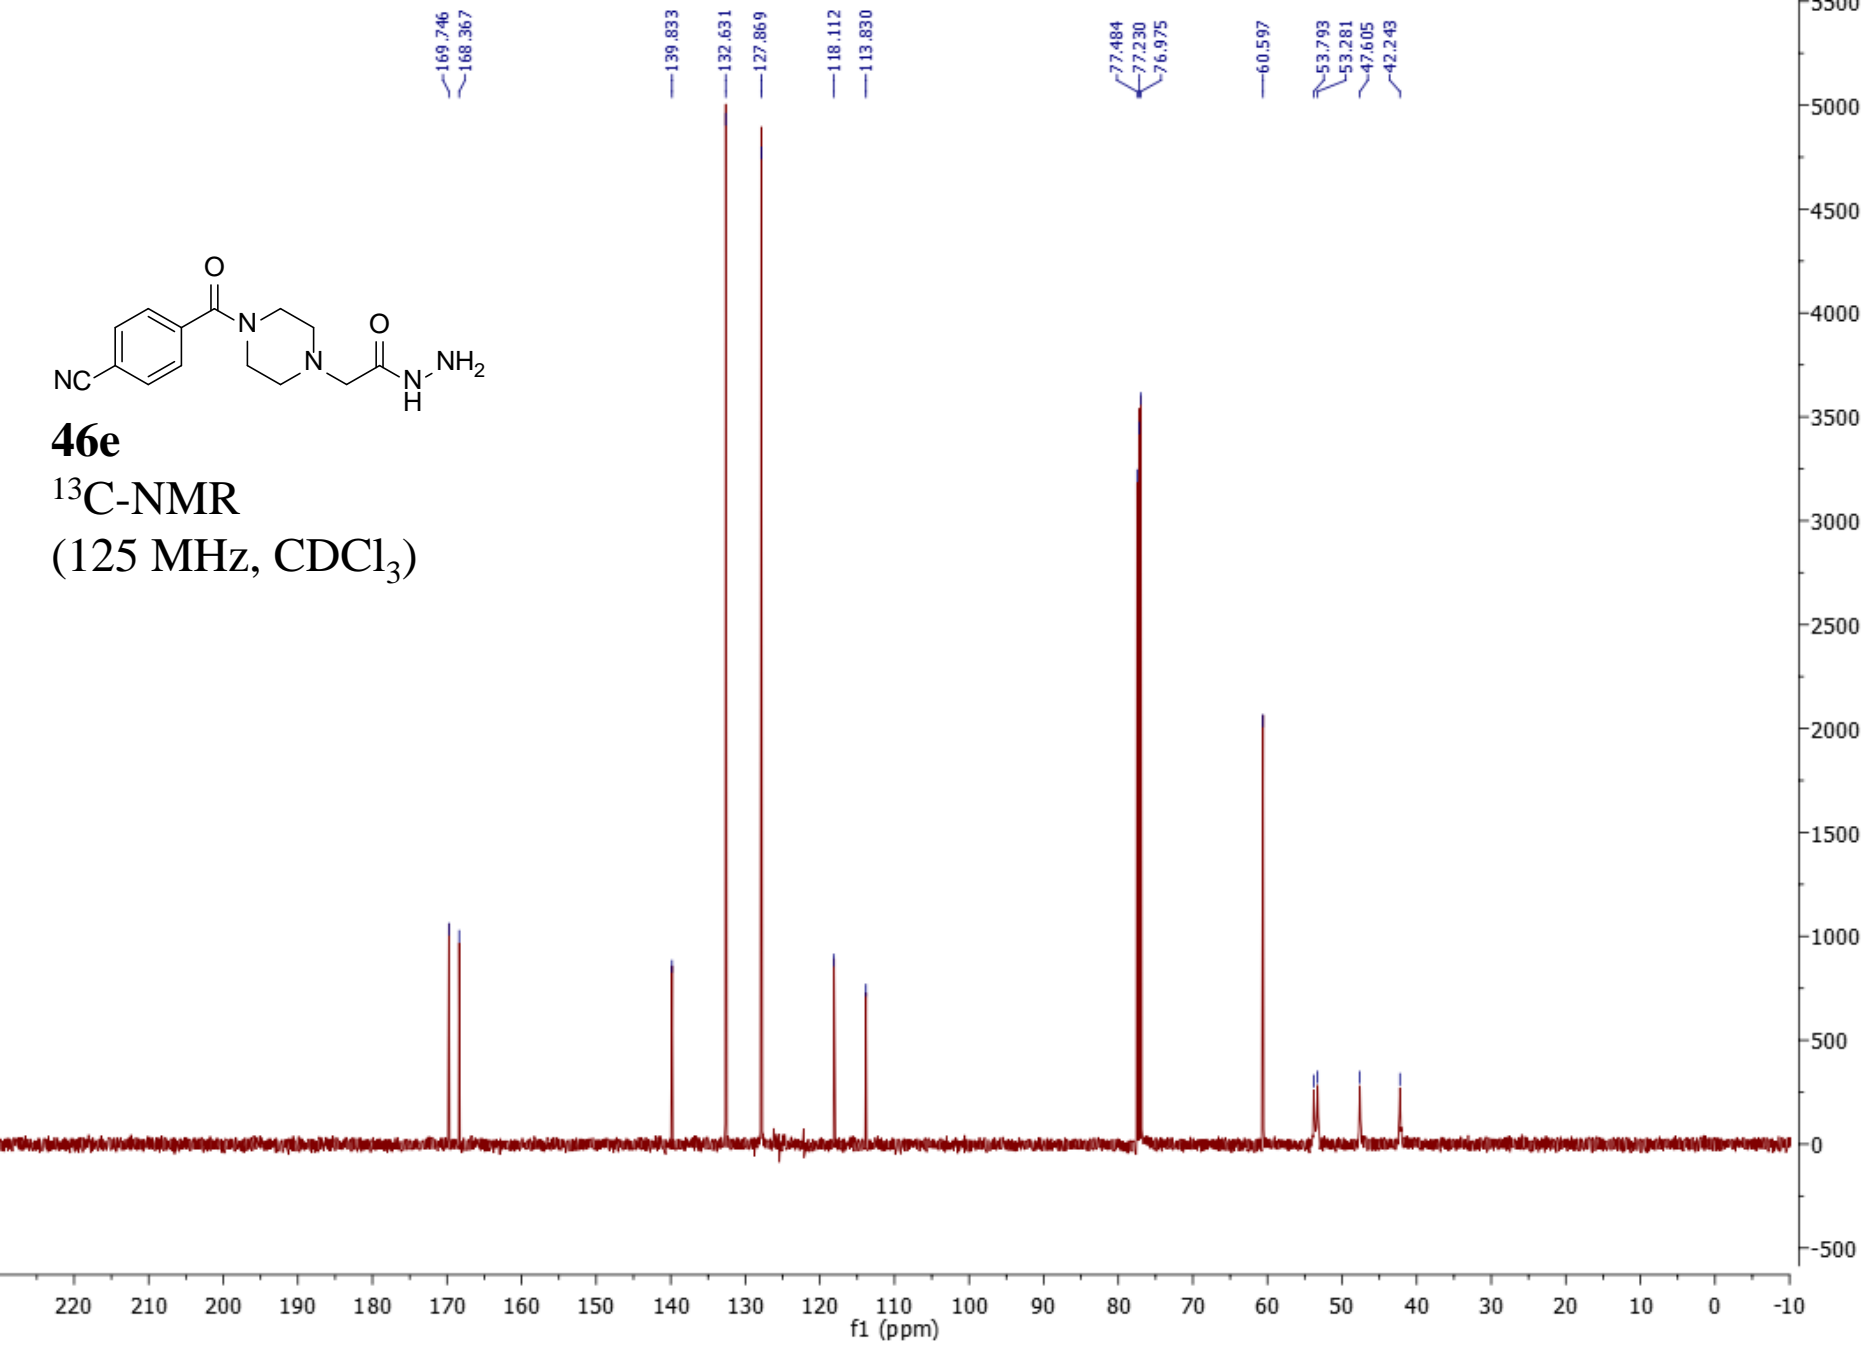

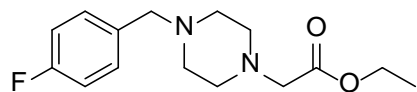

**51f**  
<sup>1</sup>H-NMR  
(500 MHz, CDCl<sub>3</sub>)

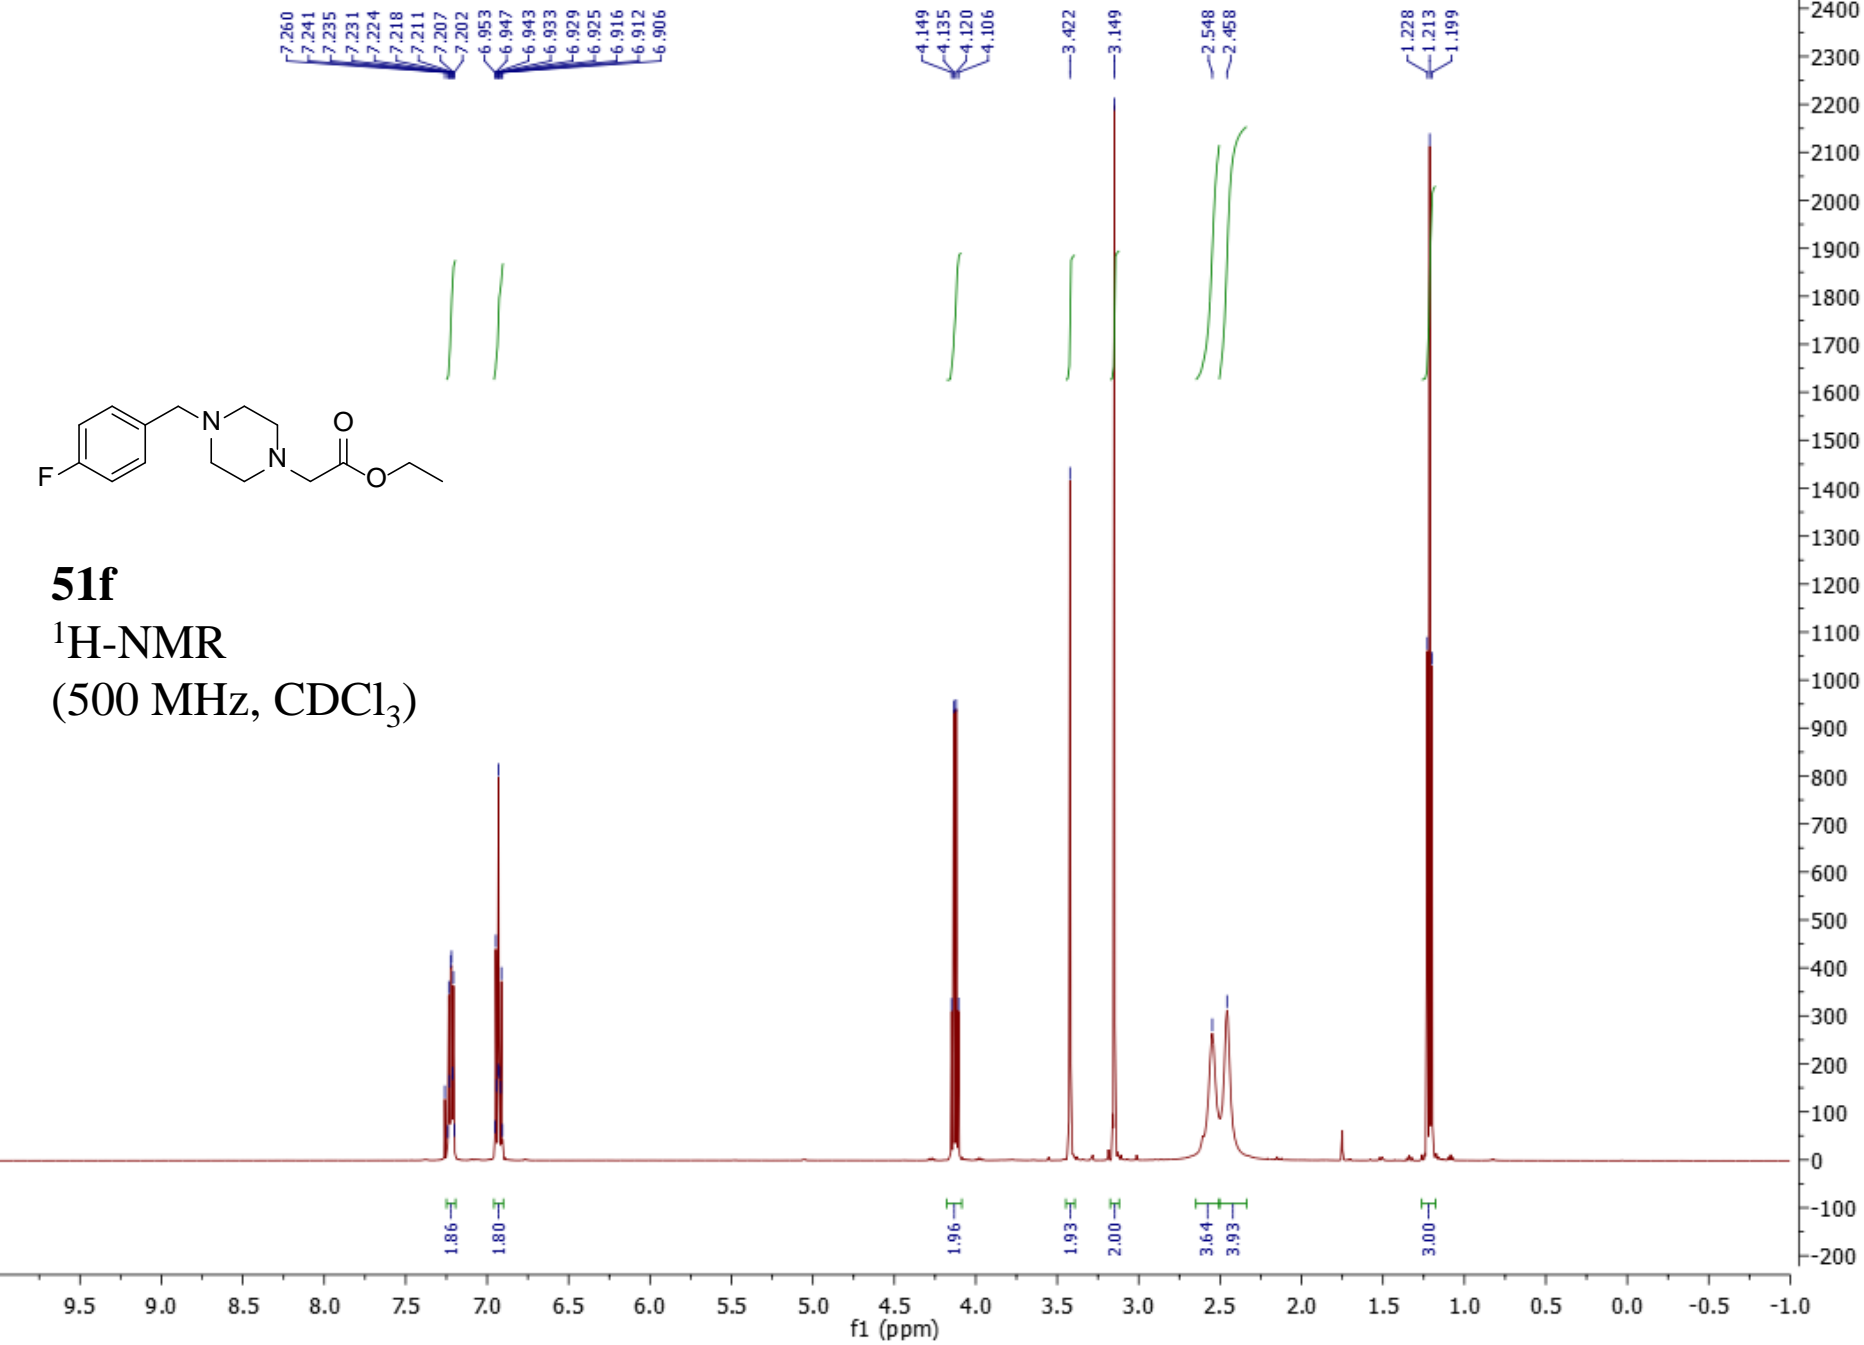

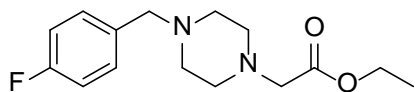

**51f**  
<sup>13</sup>C-NMR  
(125 MHz, CDCl<sub>3</sub>)

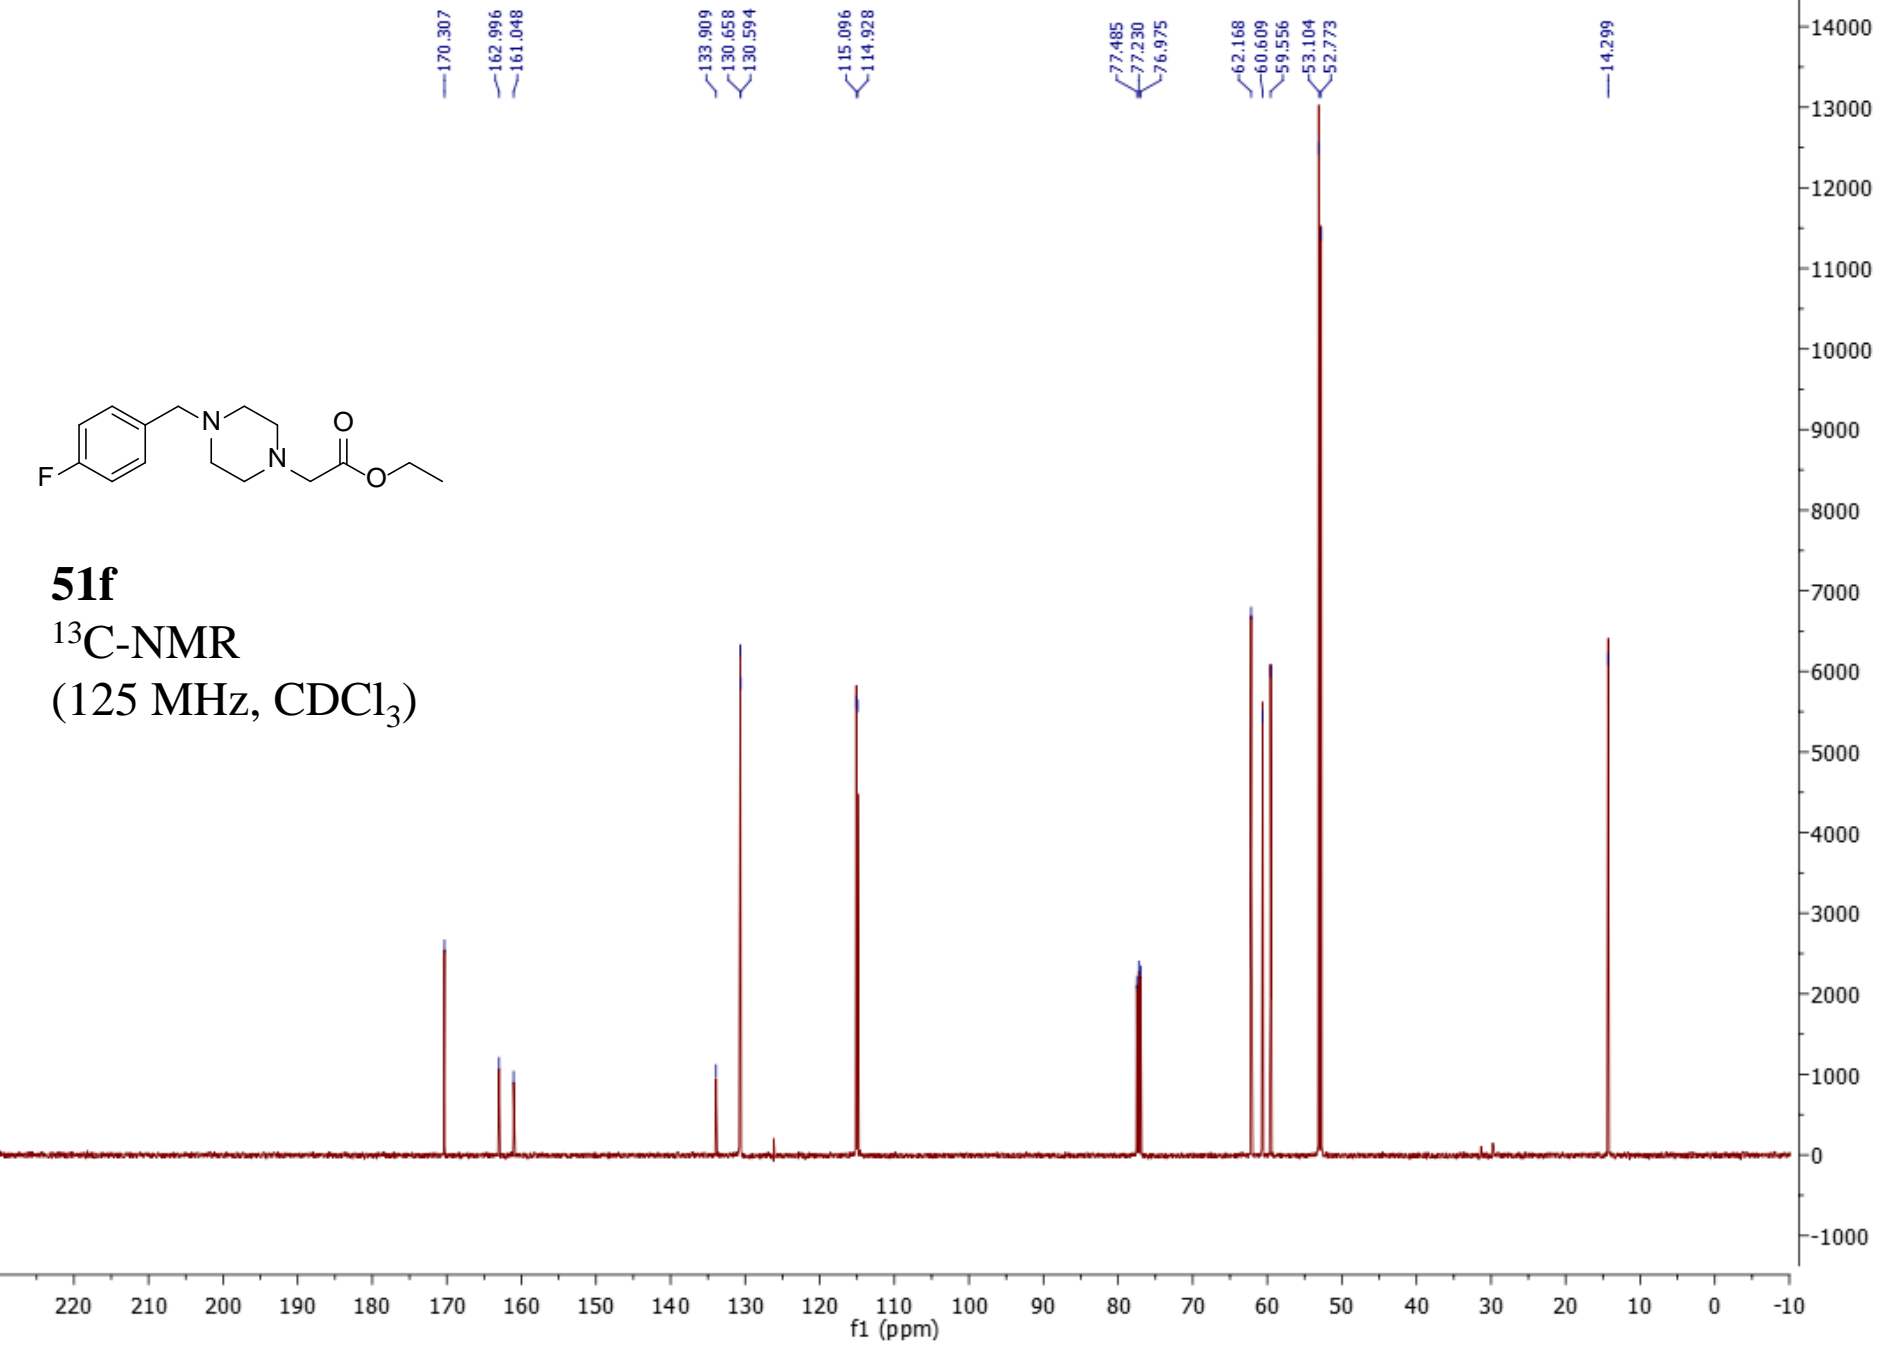

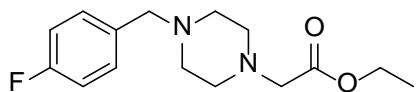

**51f**

$^{19}\text{F}$ -NMR

(470 MHz,  $\text{CDCl}_3$ )

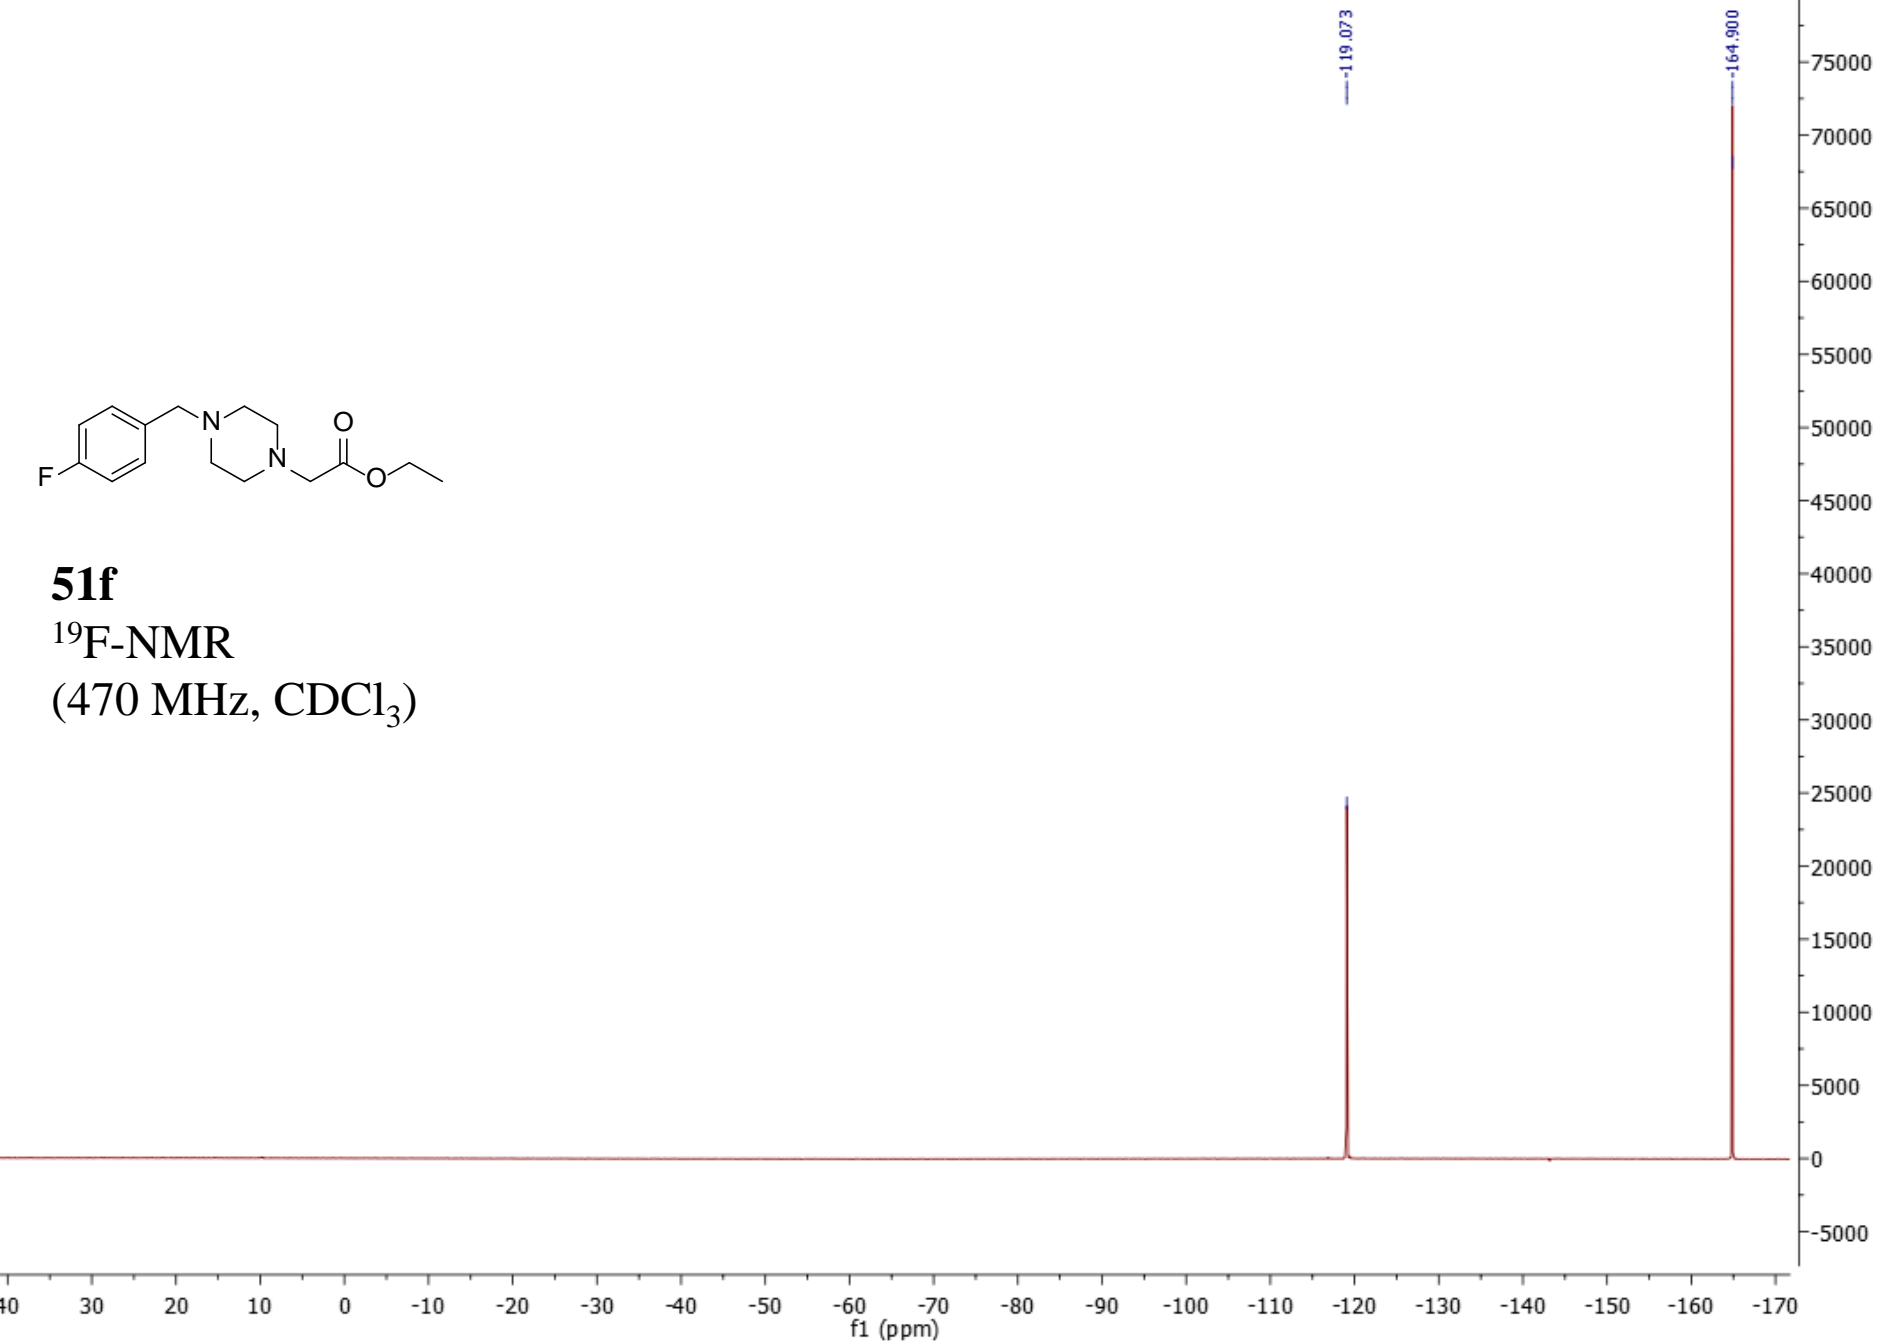

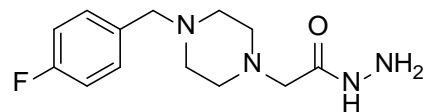

**46f**

<sup>1</sup>H-NMR

(500 MHz, CDCl<sub>3</sub>)

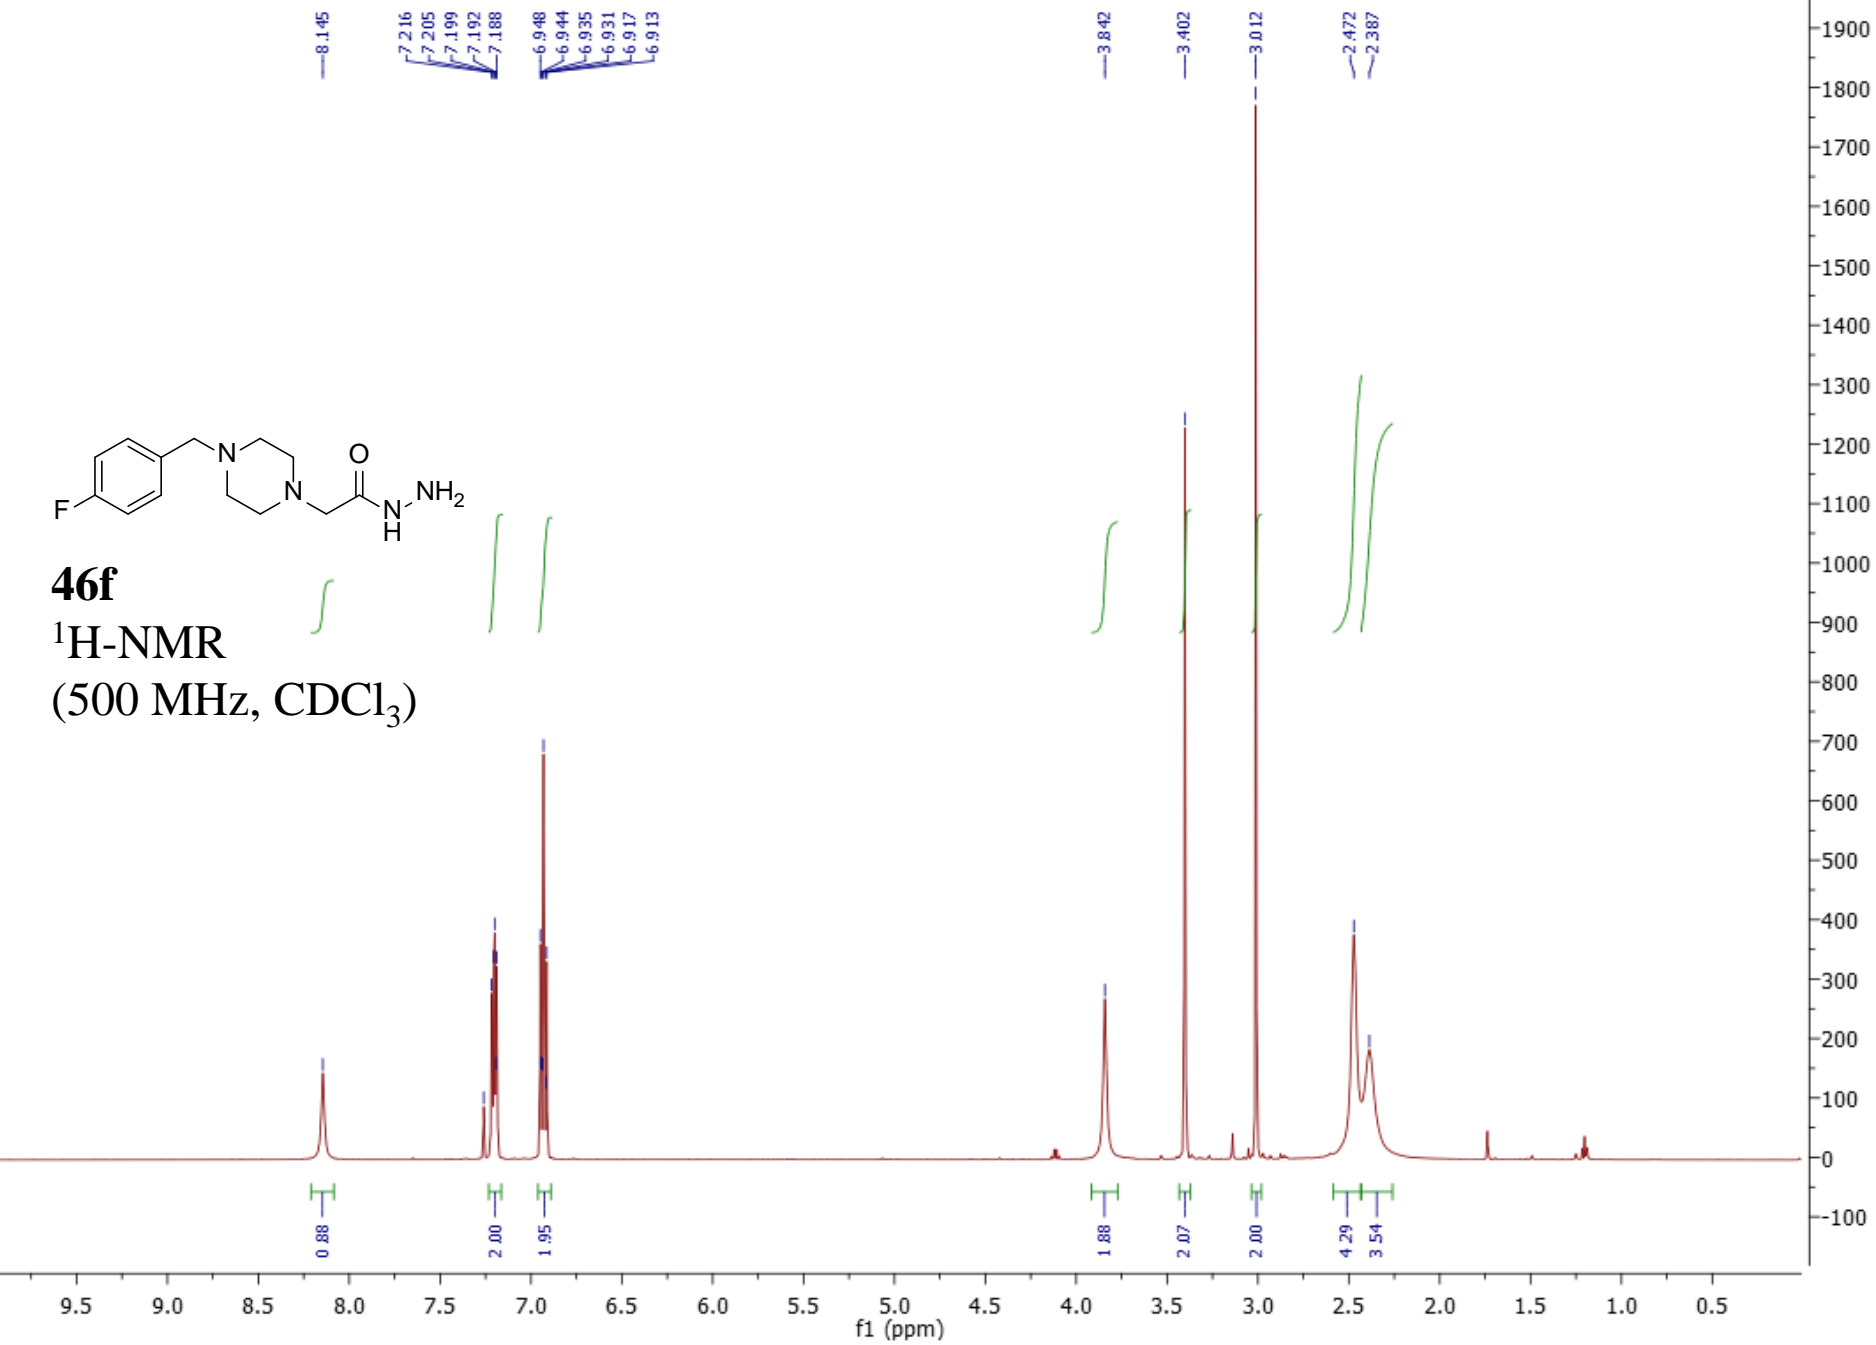



**46f**

$^{13}\text{C}$ -NMR

(125 MHz,  $\text{CDCl}_3$ )

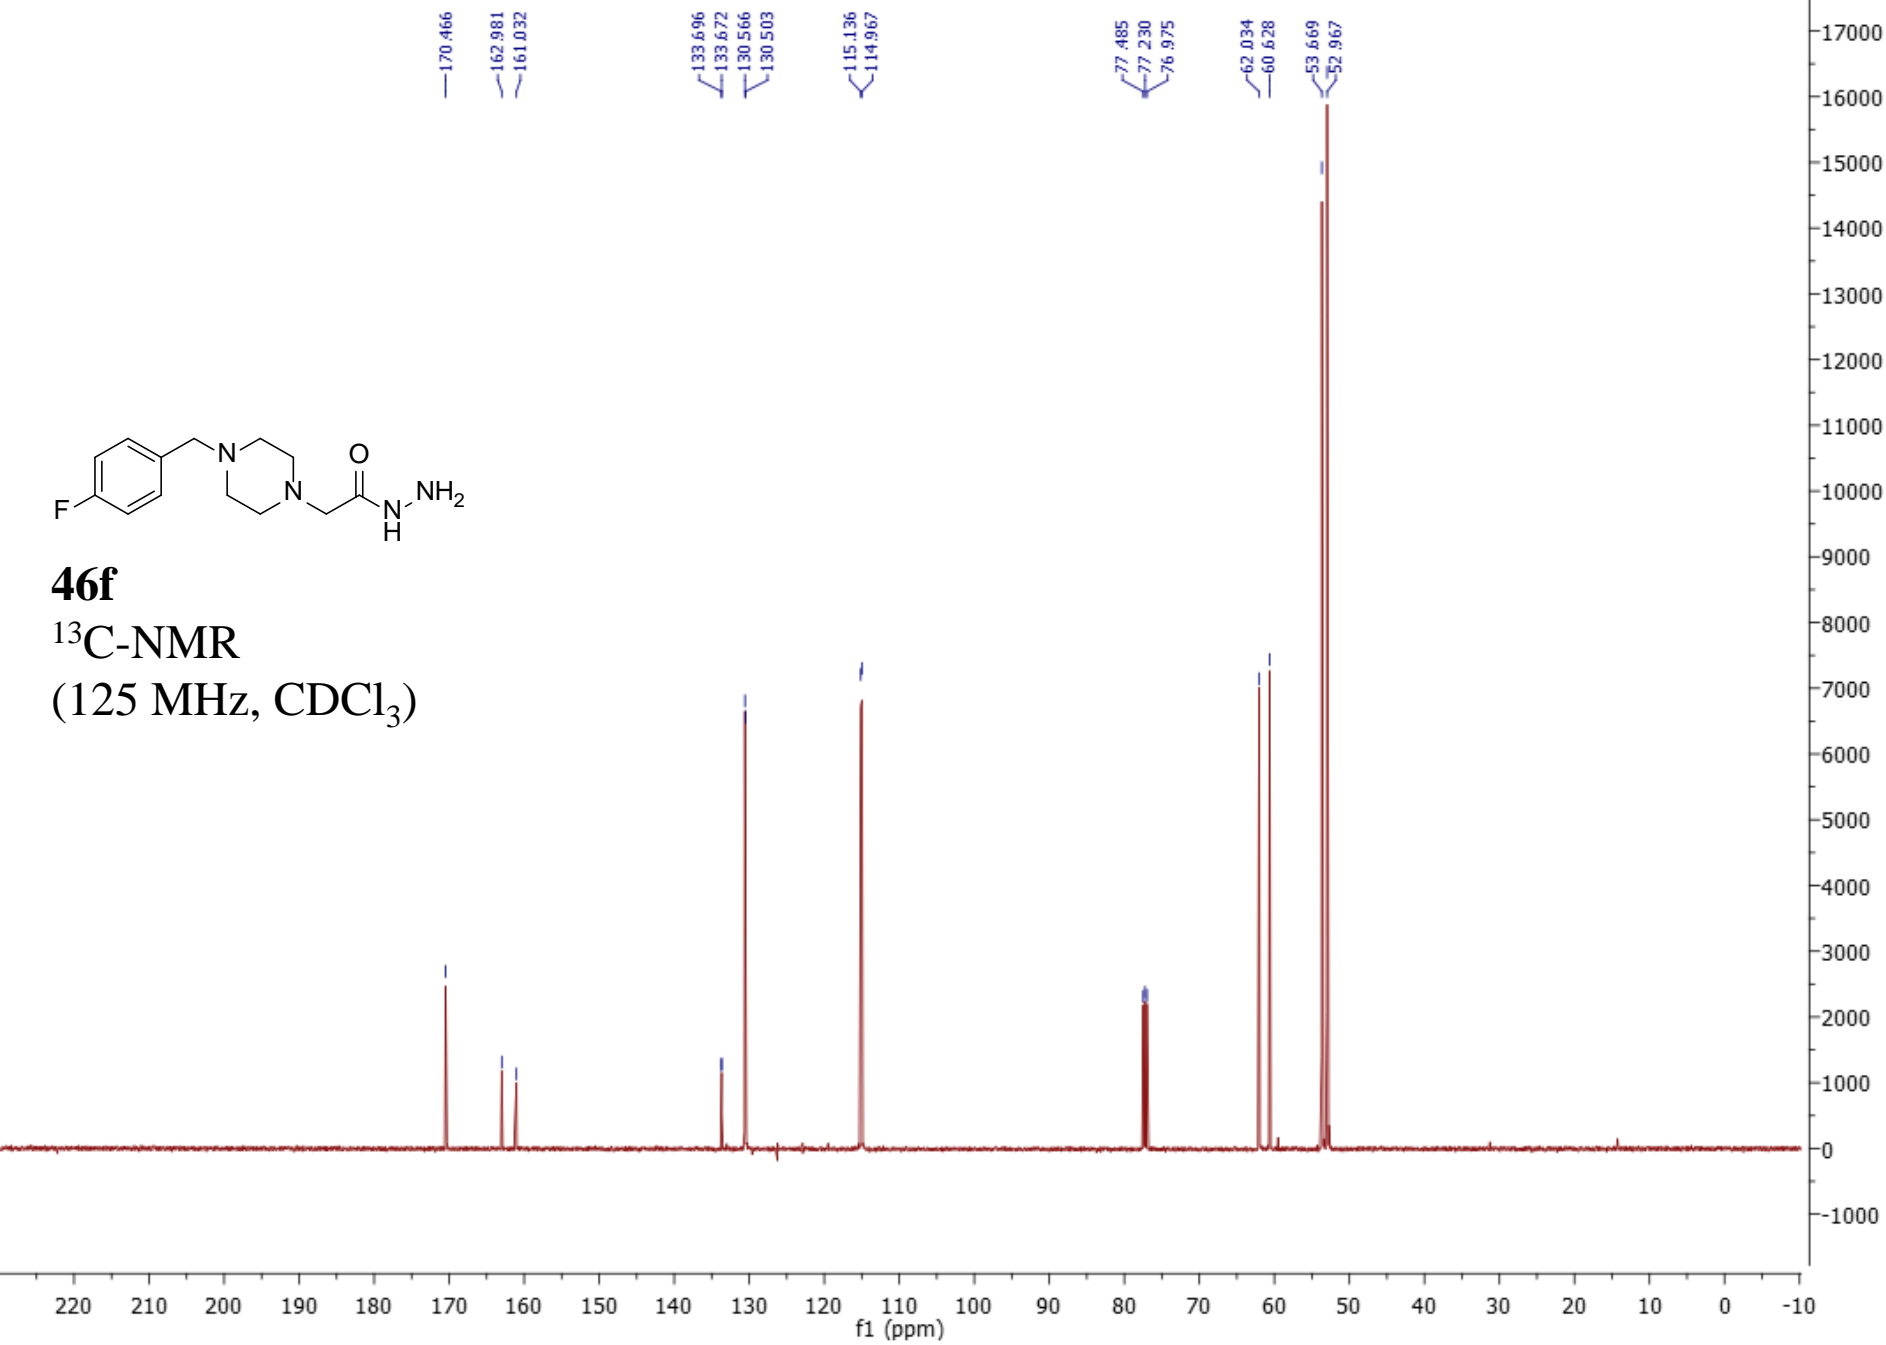

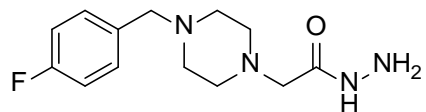

**46f**

$^{19}\text{F}$ -NMR

(470 MHz,  $\text{CDCl}_3$ )

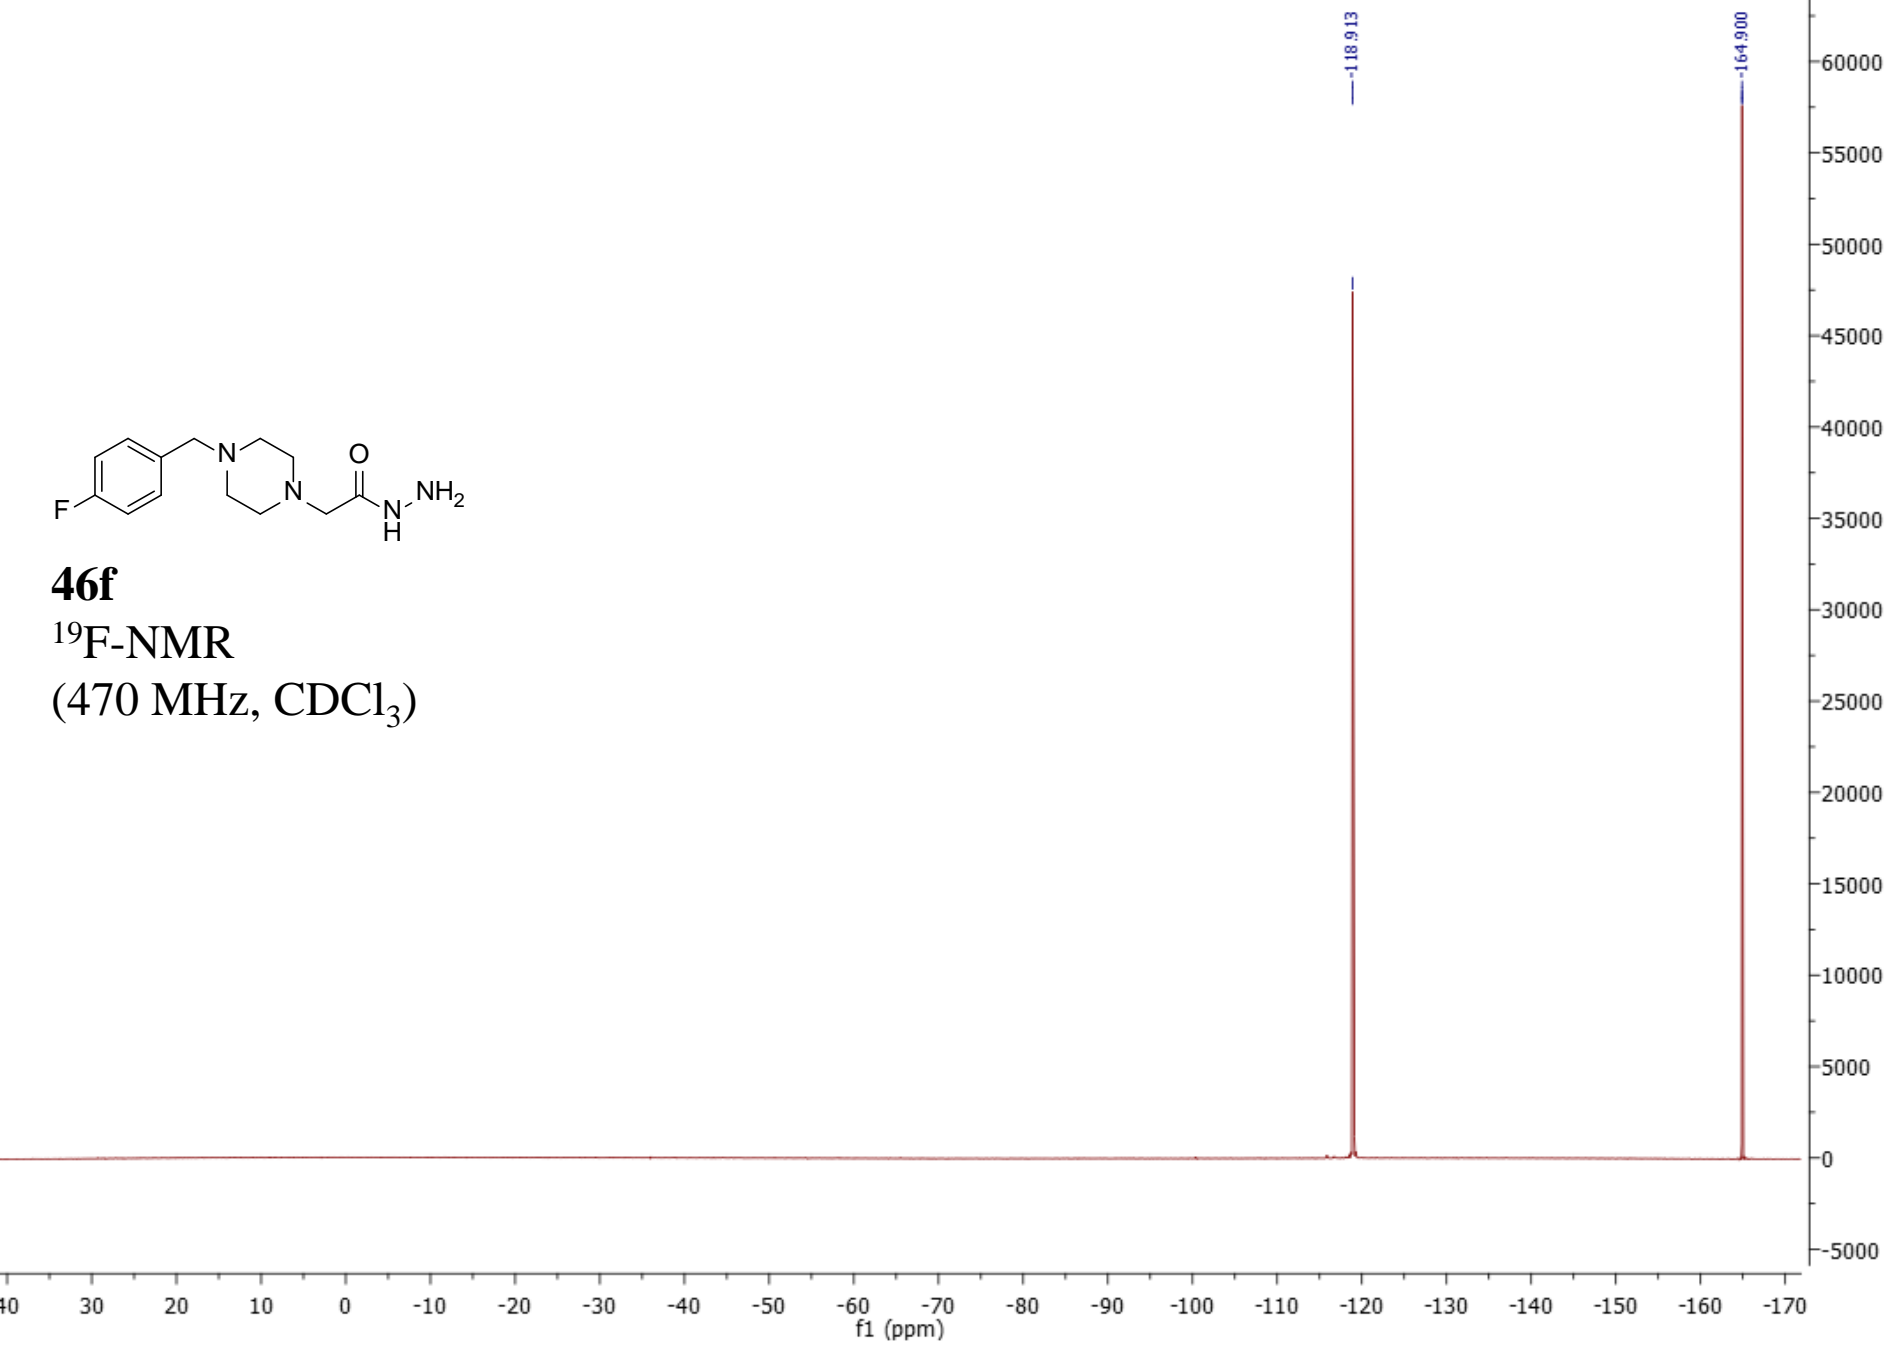

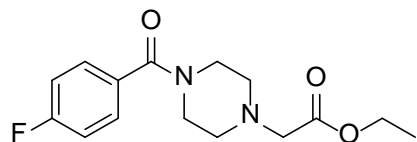

**51g**

<sup>1</sup>H-NMR

(500 MHz, CDCl<sub>3</sub>)

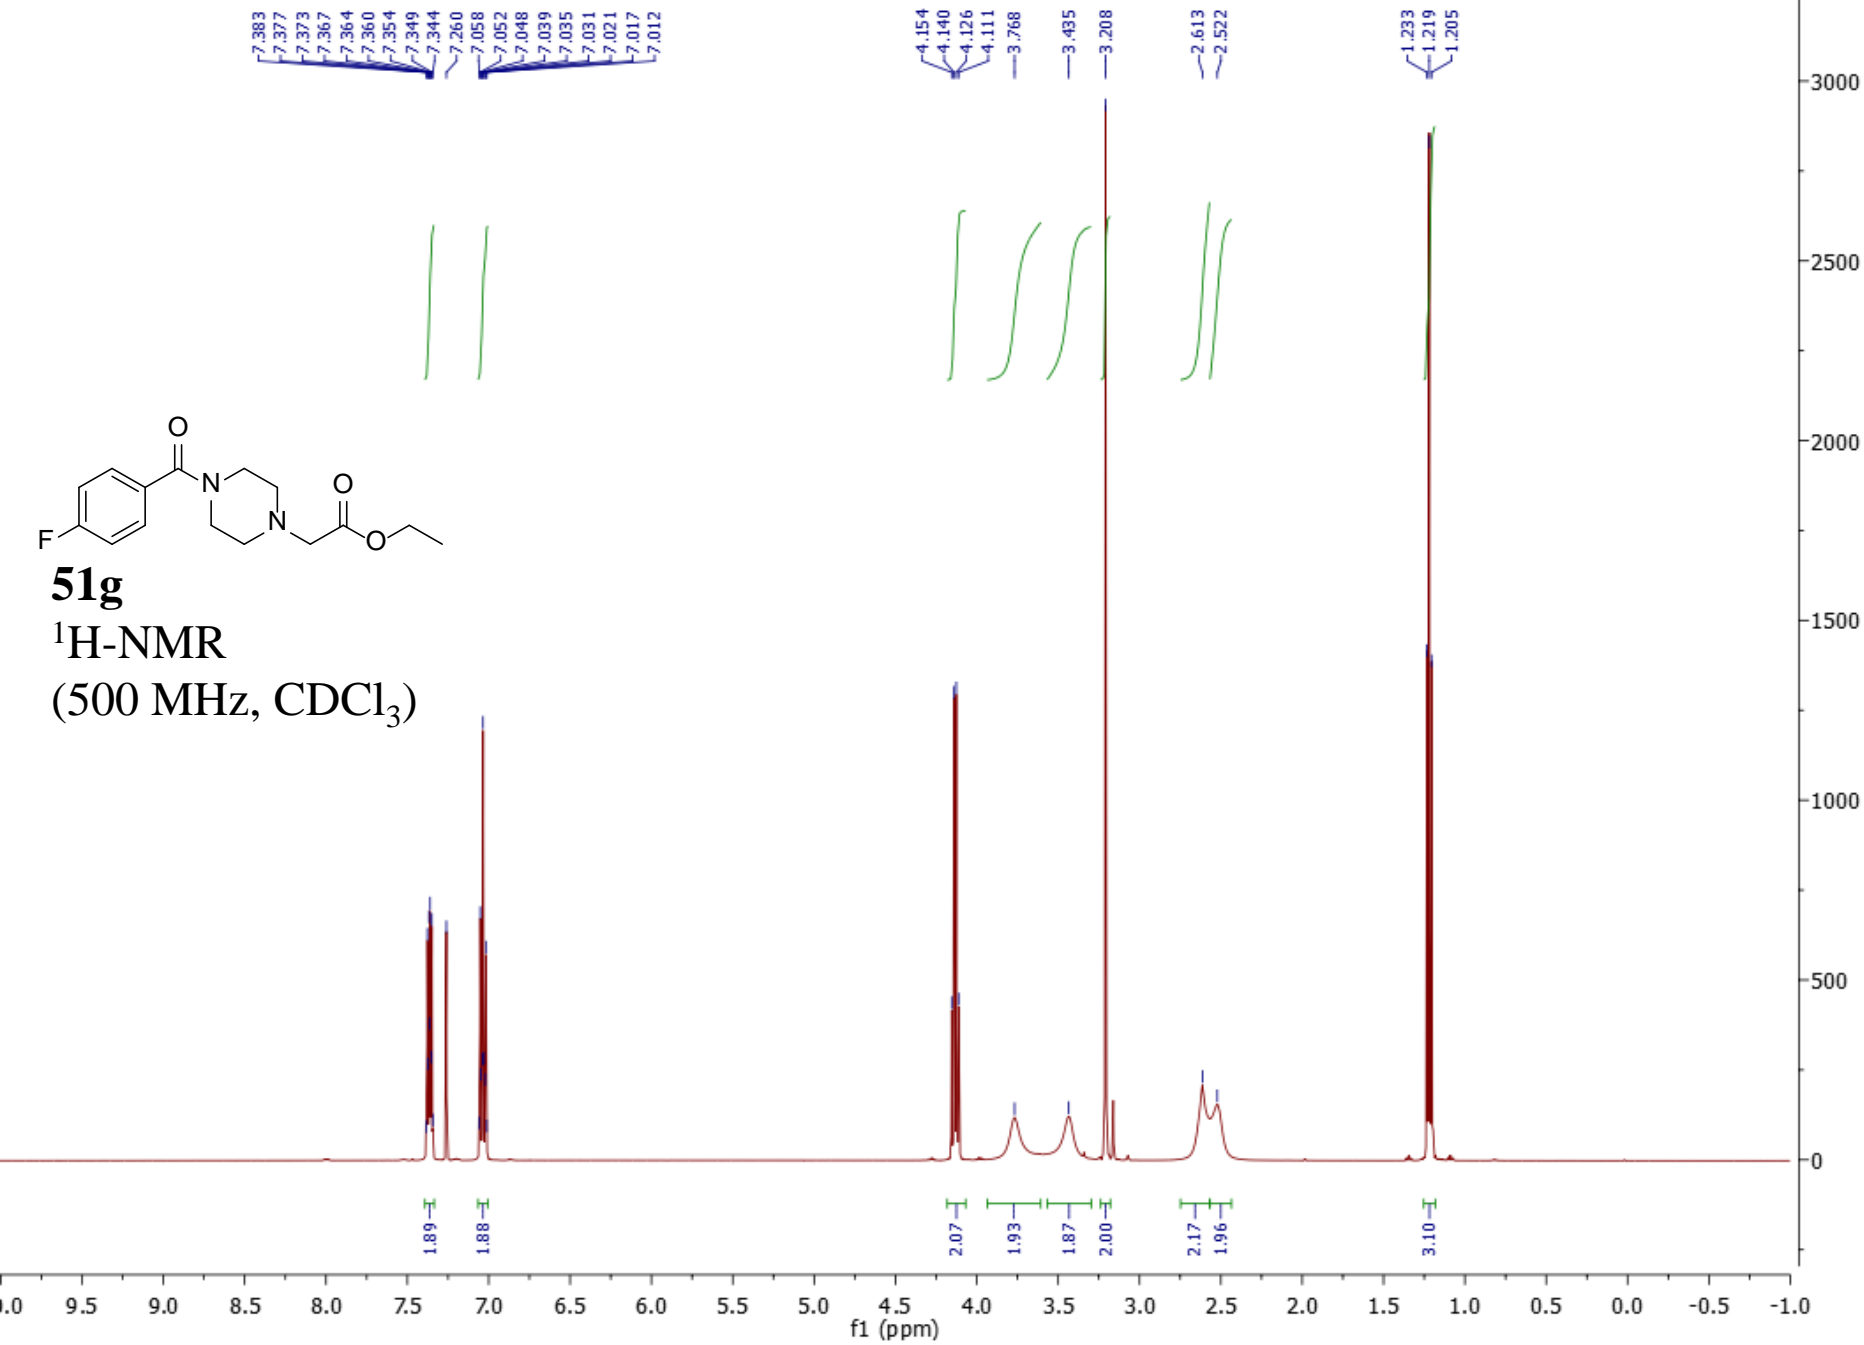



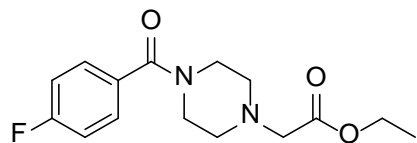

**51g**

$^{13}\text{C}$ -NMR

(125 MHz,  $\text{CDCl}_3$ )

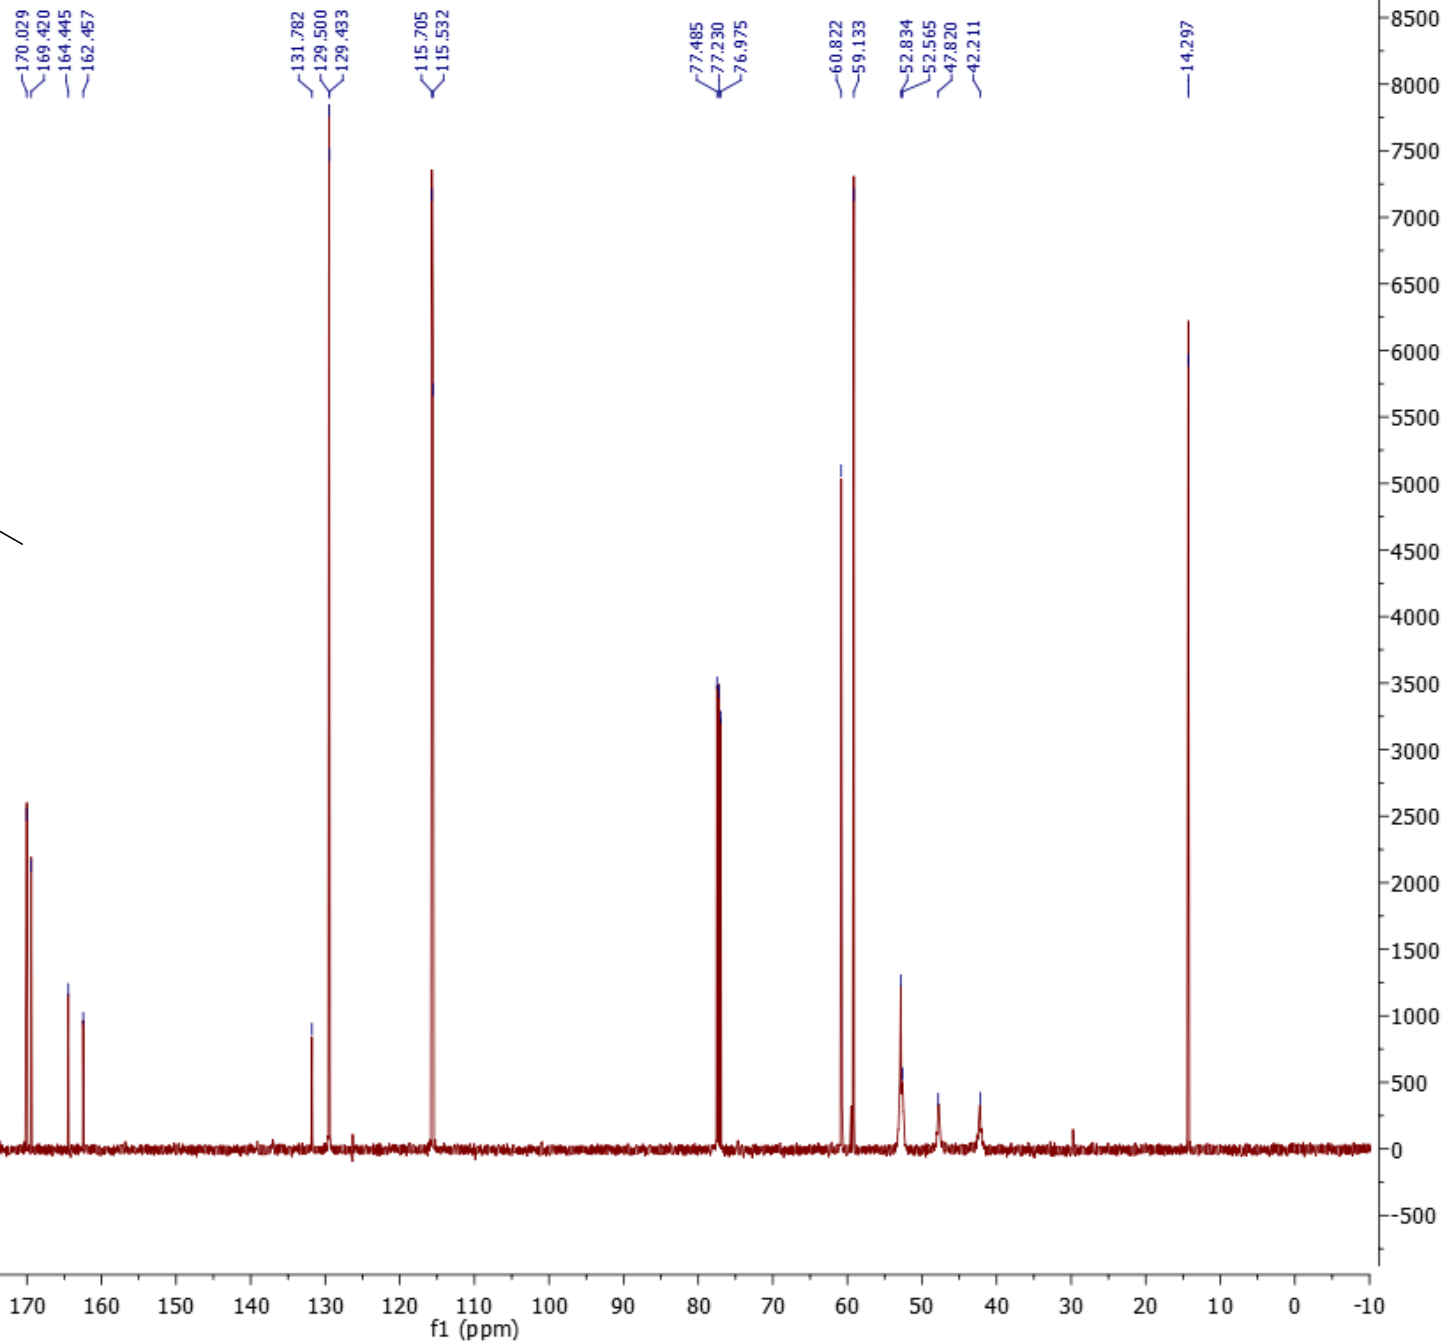



**51g**

$^{19}\text{F}$ -NMR

(470 MHz,  $\text{CDCl}_3$ )

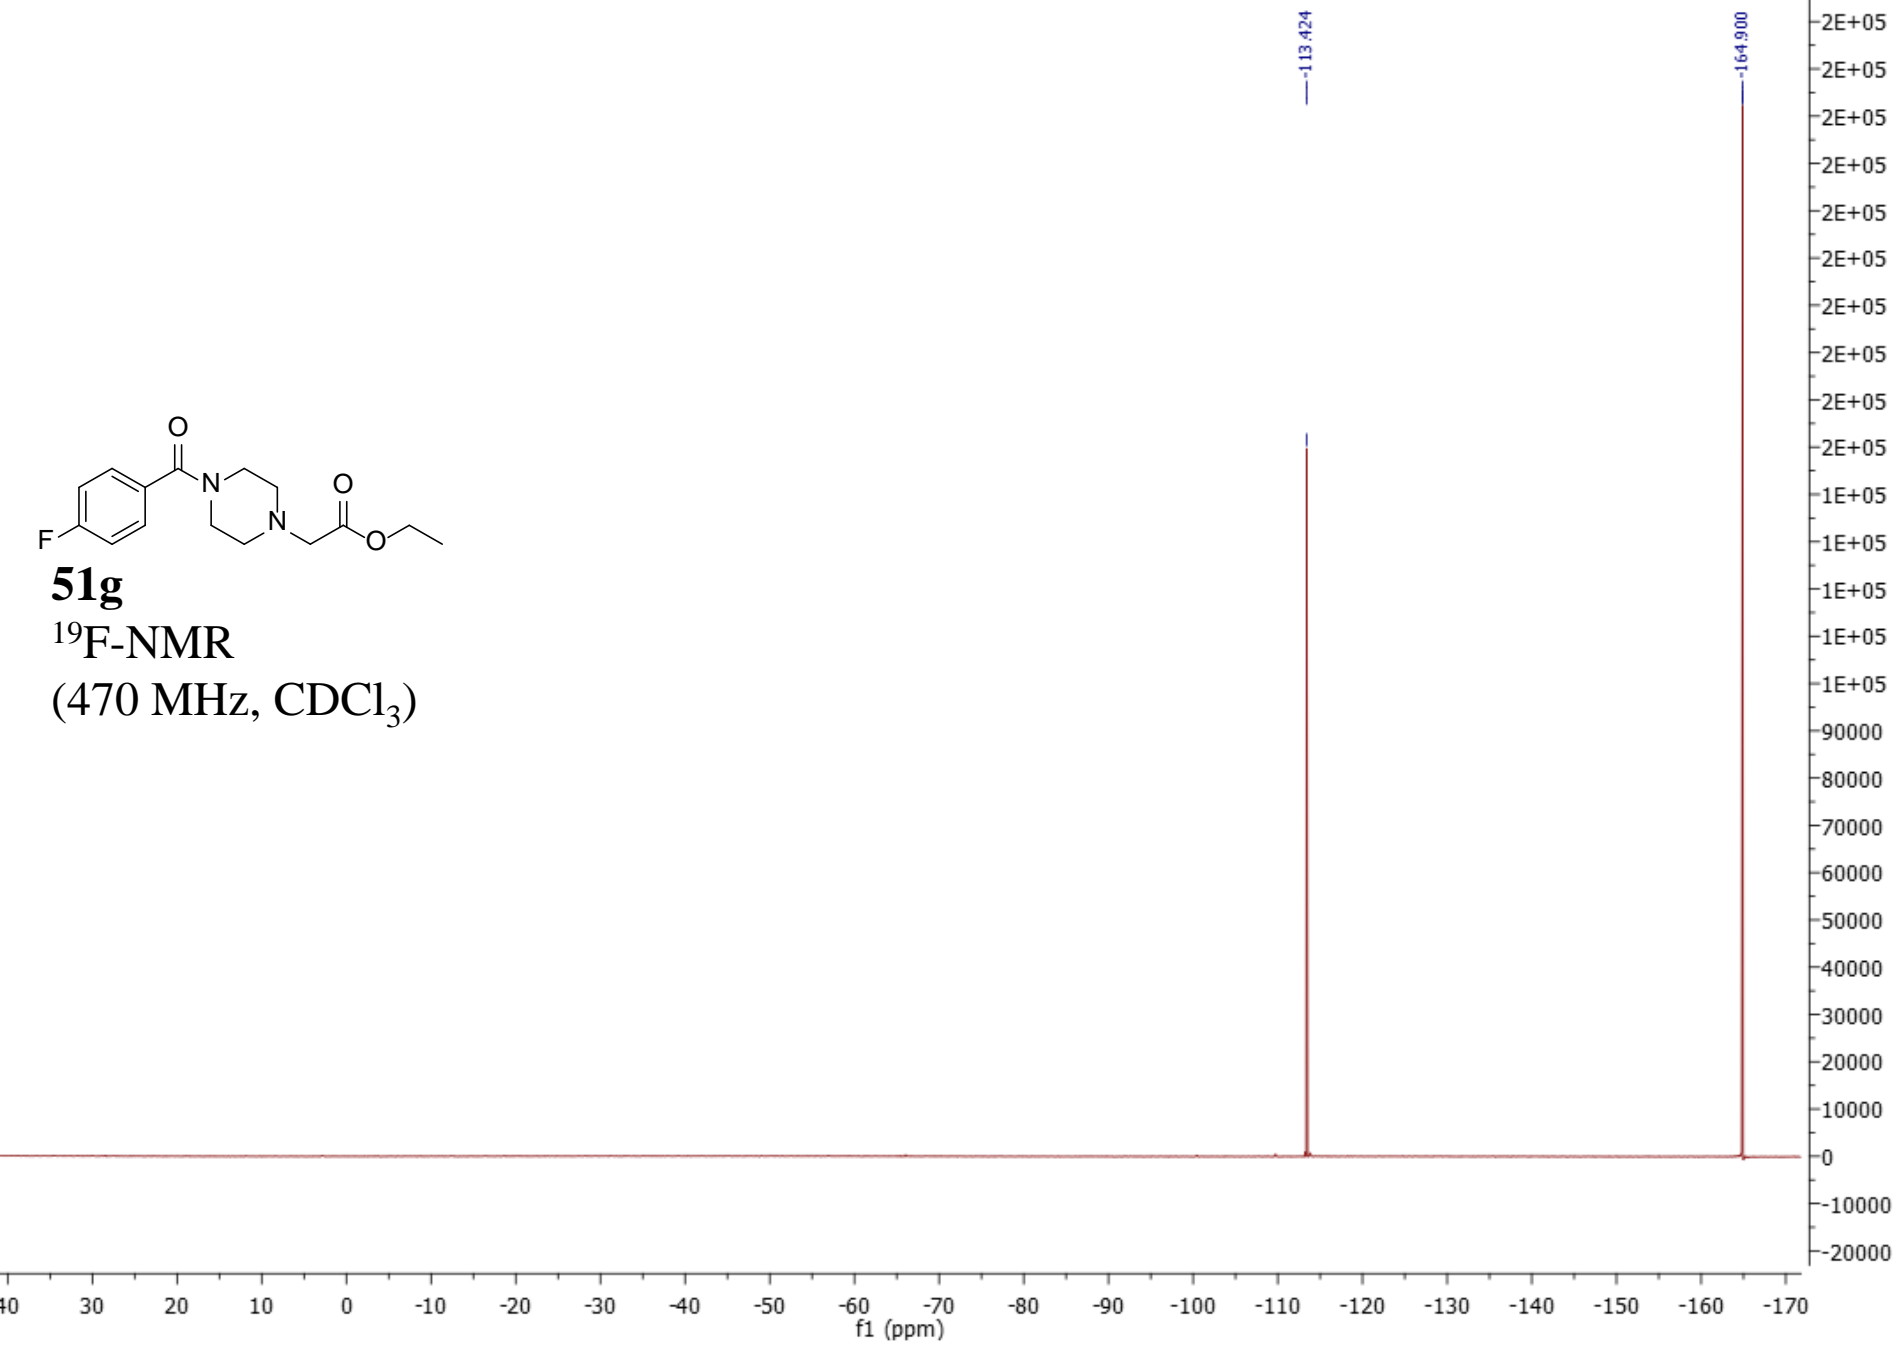

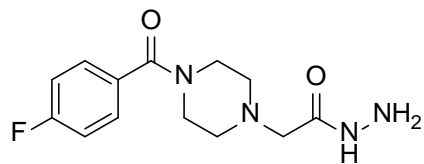

**46g**

<sup>1</sup>H-NMR

(500 MHz, CDCl<sub>3</sub>)

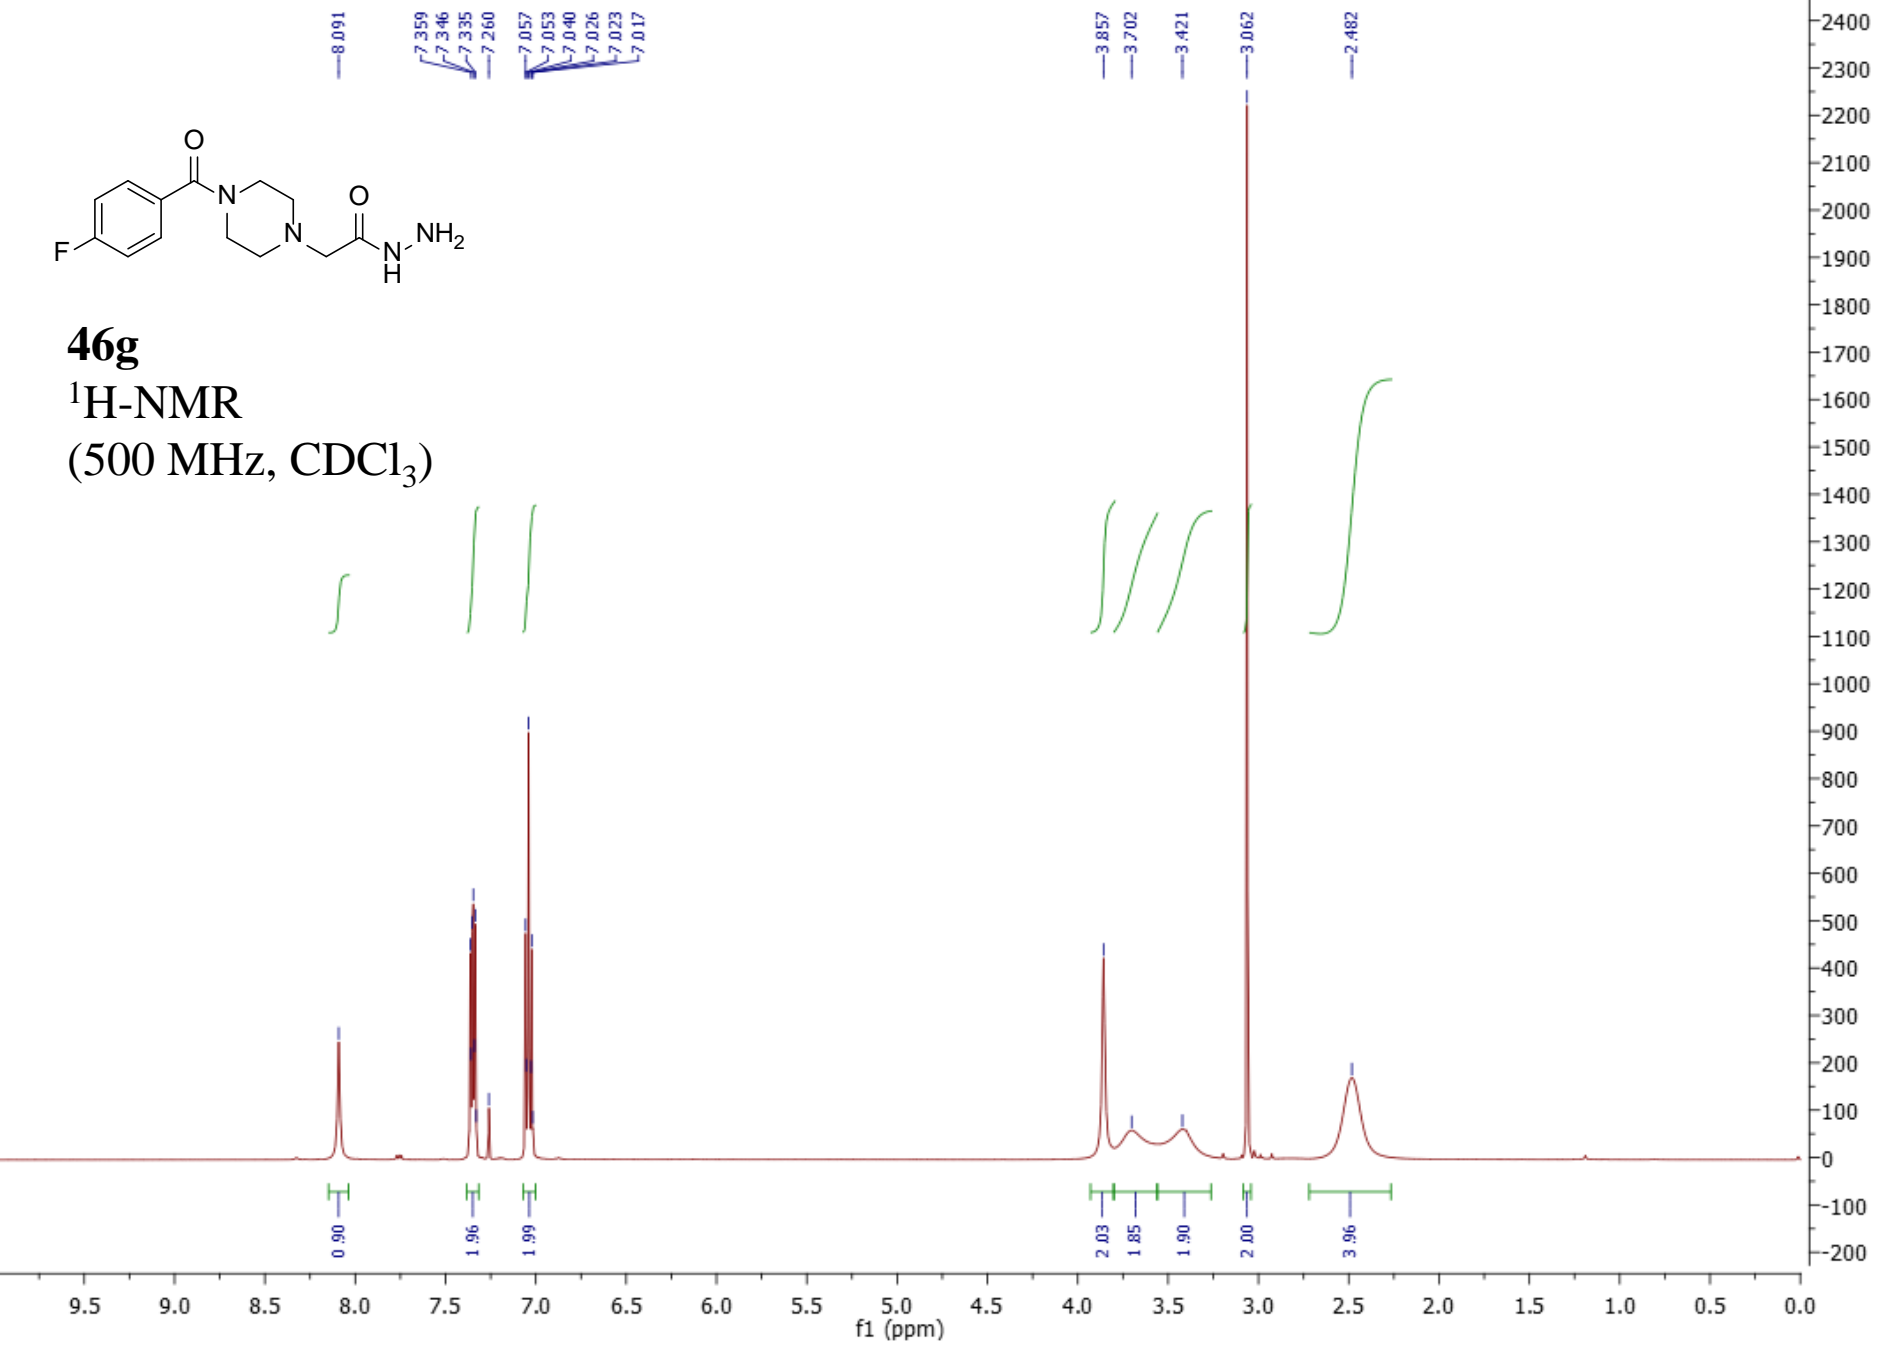



**46g**  
<sup>13</sup>C-NMR  
(125 MHz, CDCl<sub>3</sub>)

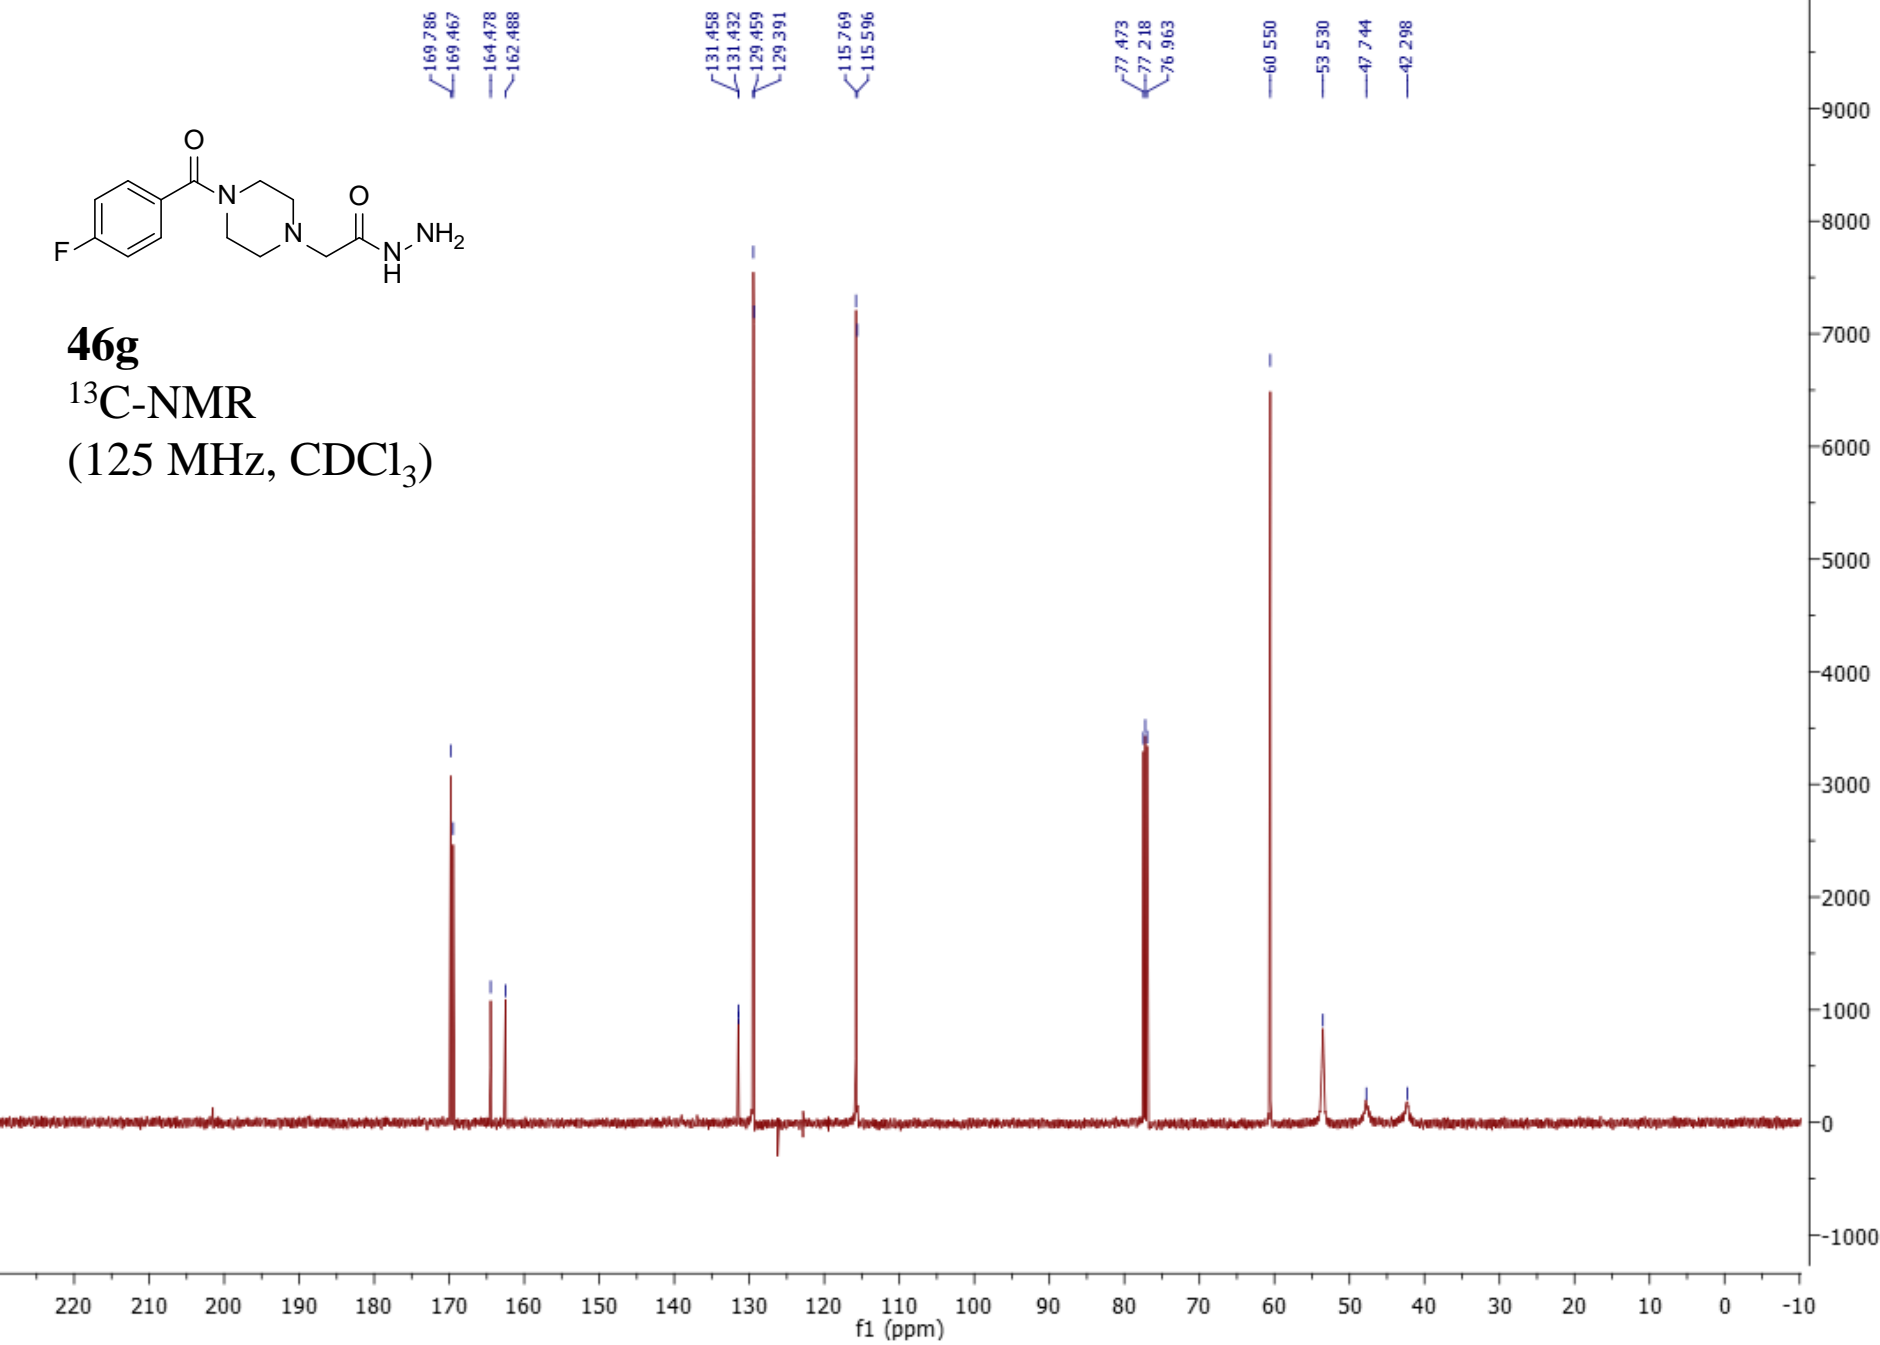

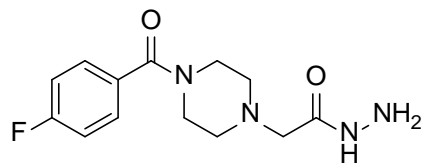

**46g**

$^{19}\text{F}$ -NMR

(470 MHz,  $\text{CDCl}_3$ )

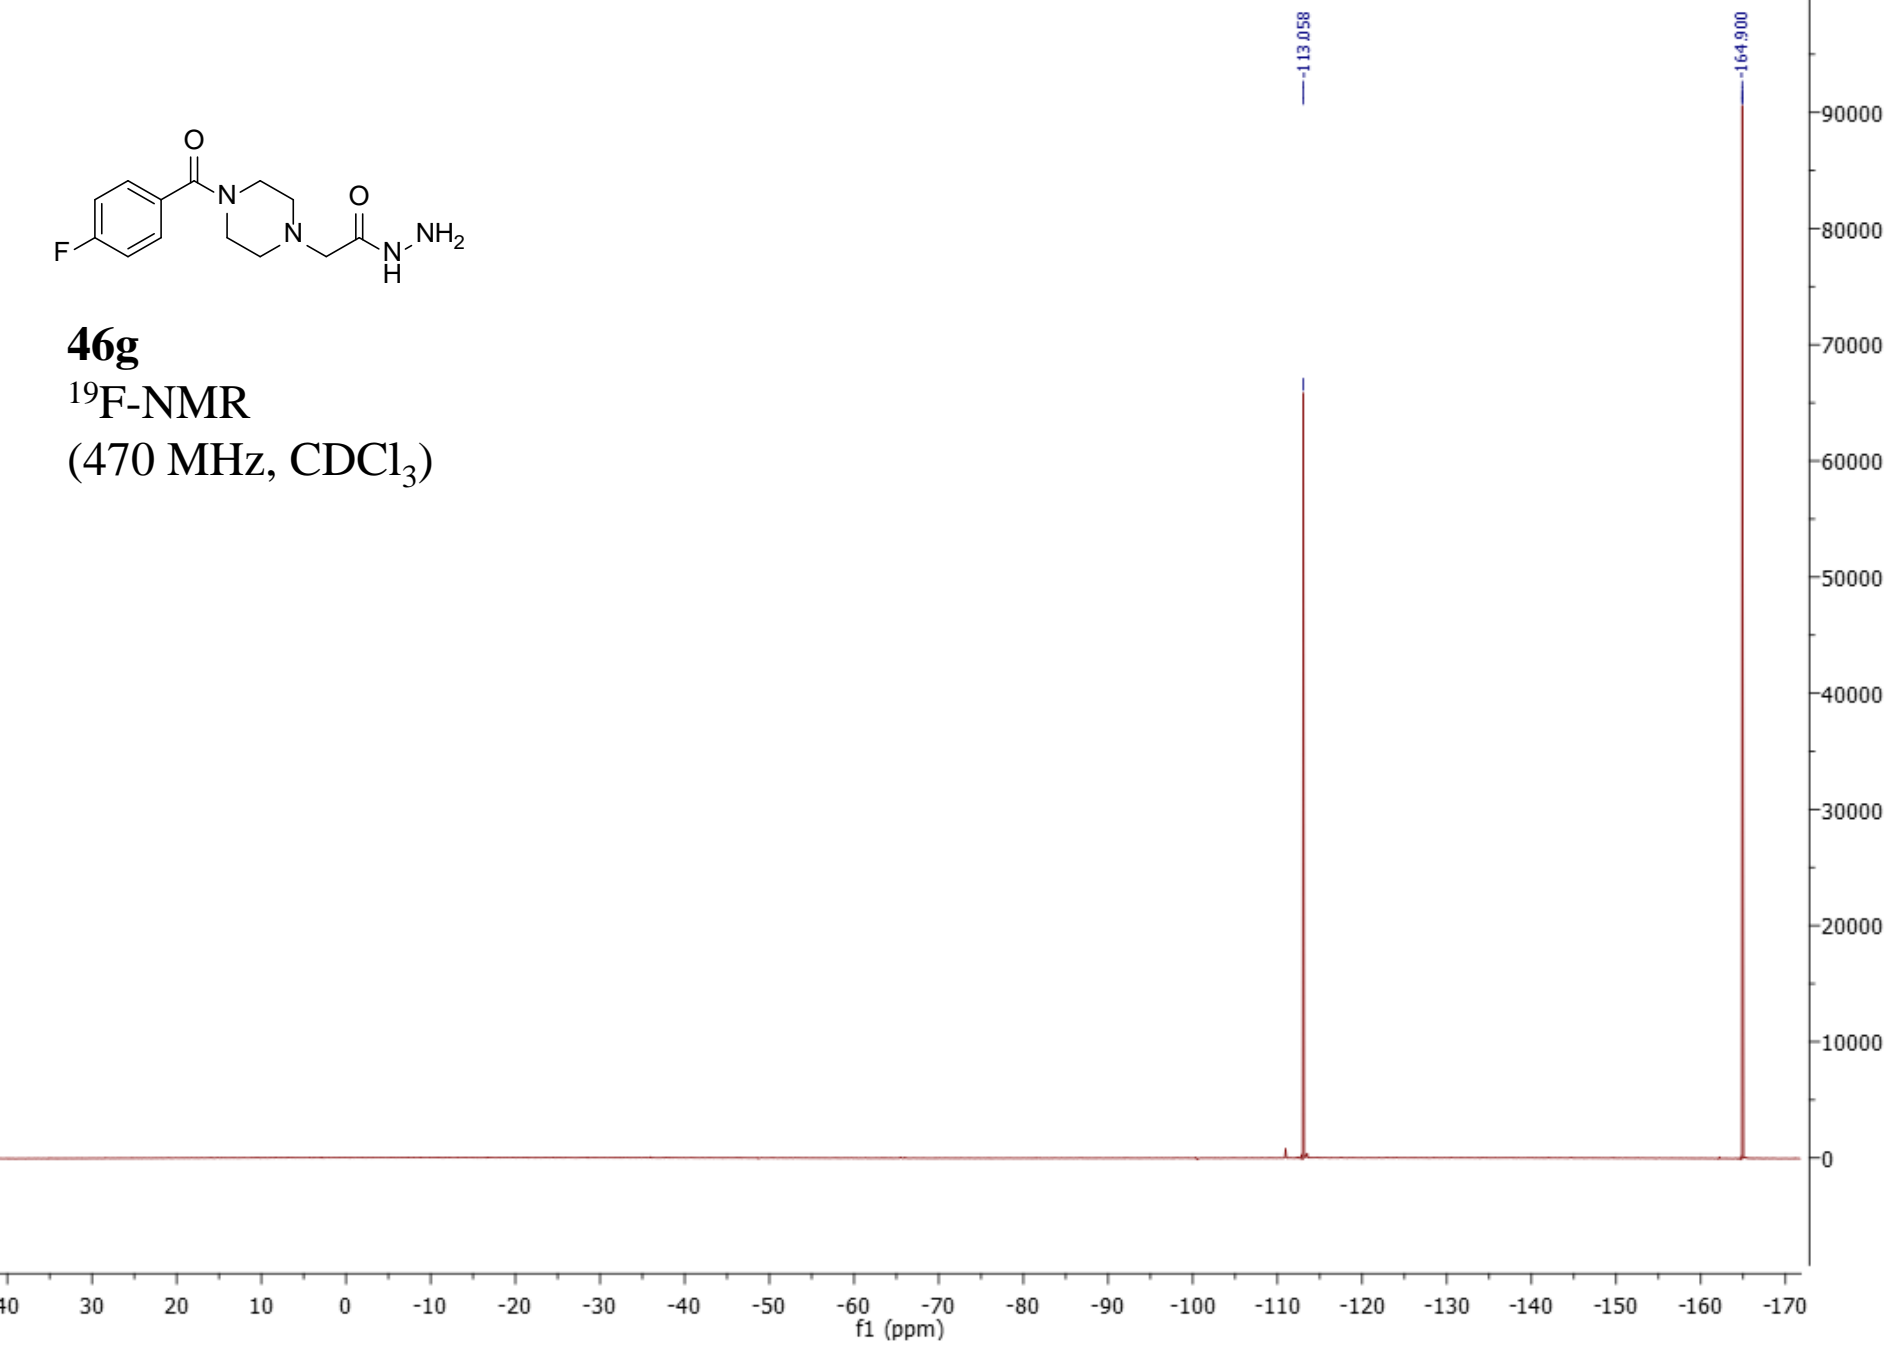

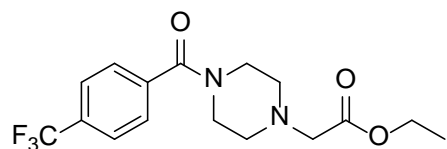

**51i**

$^1\text{H-NMR}$

(500 MHz,  $\text{CDCl}_3$ )

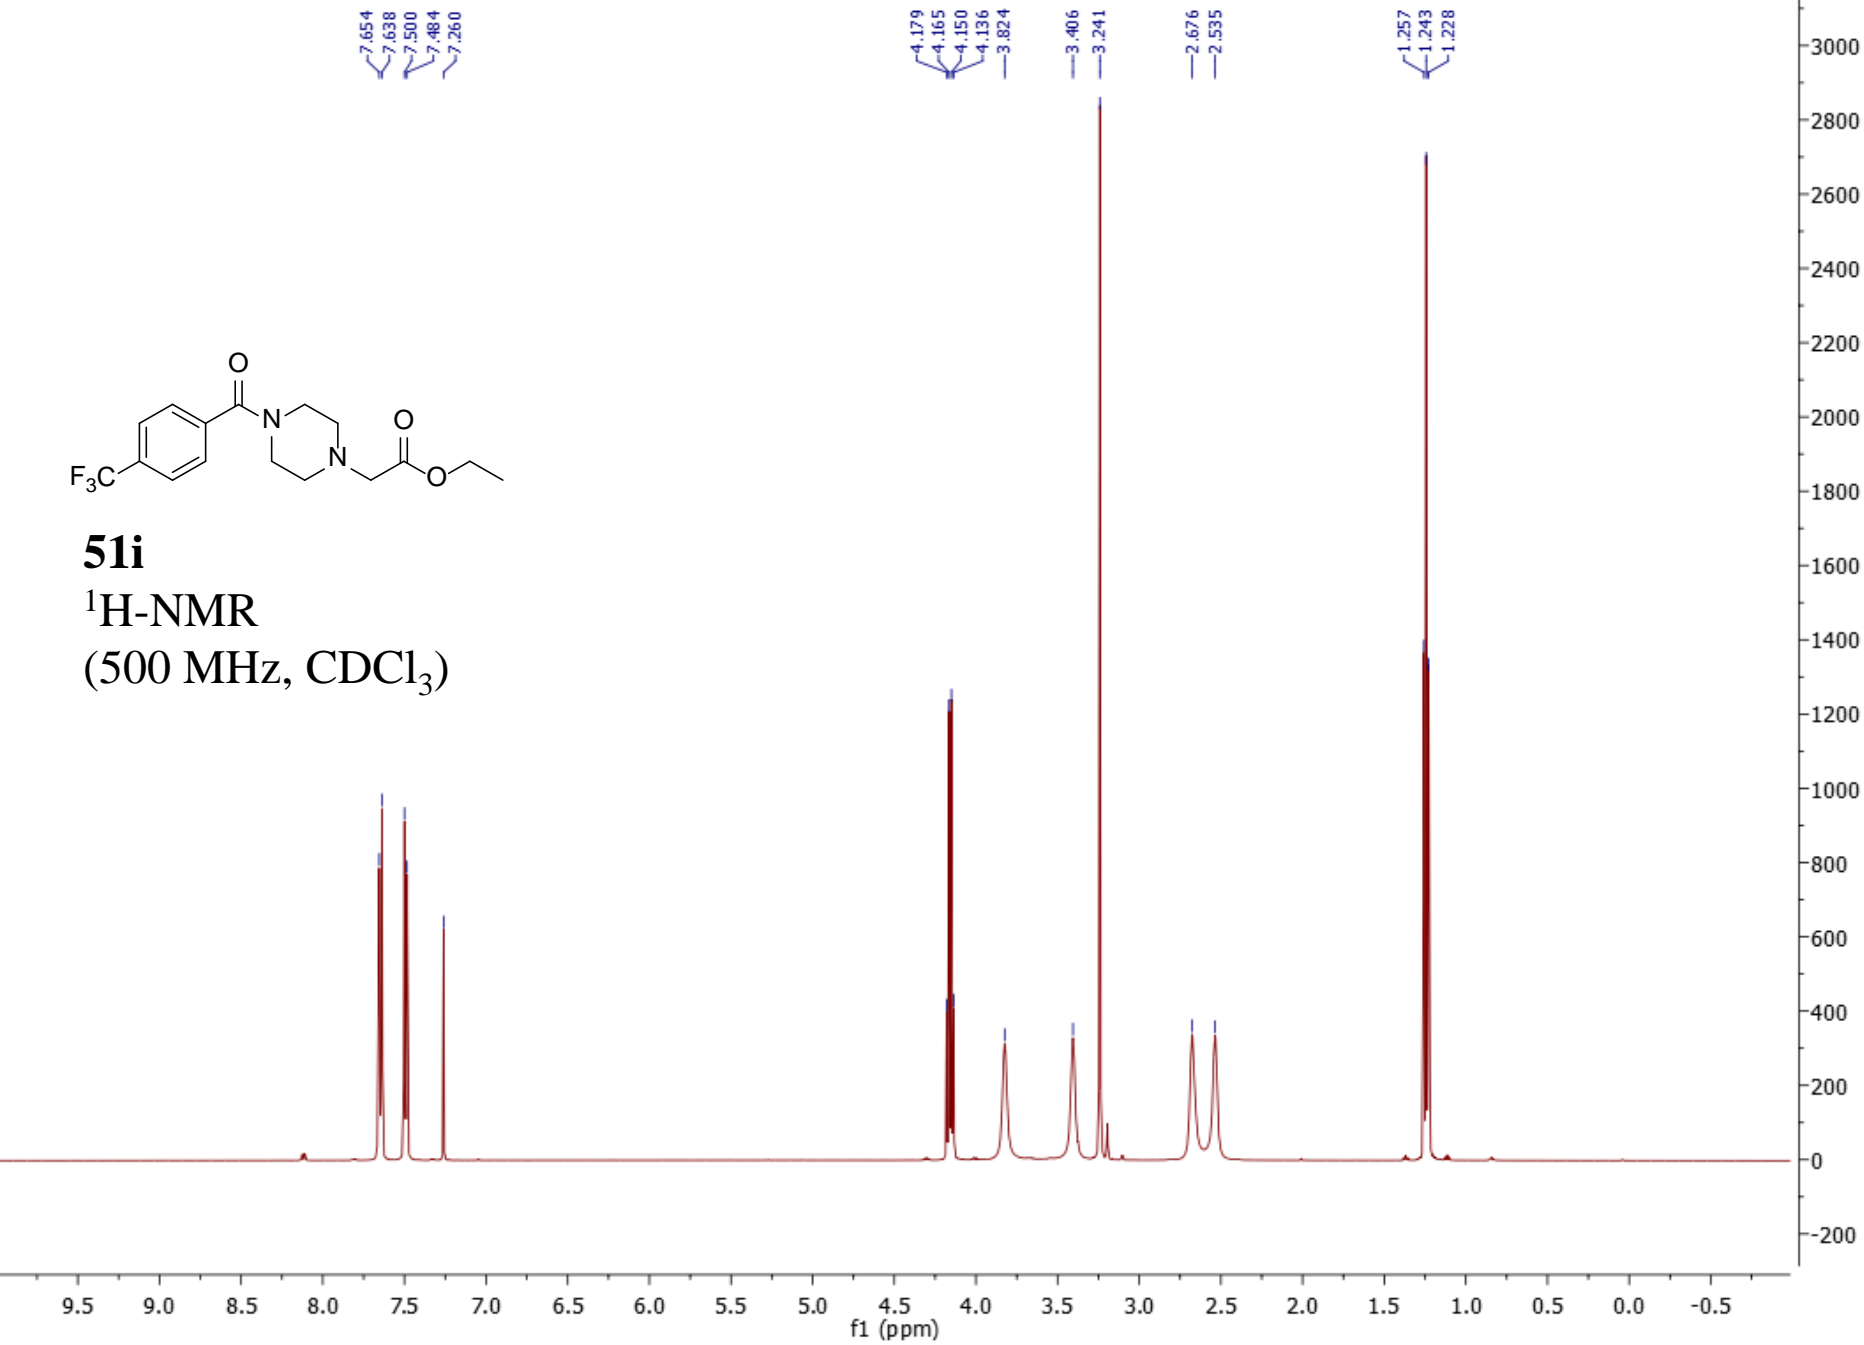



**51i**

$^{13}\text{C}$ -NMR

(125 MHz,  $\text{CDCl}_3$ )

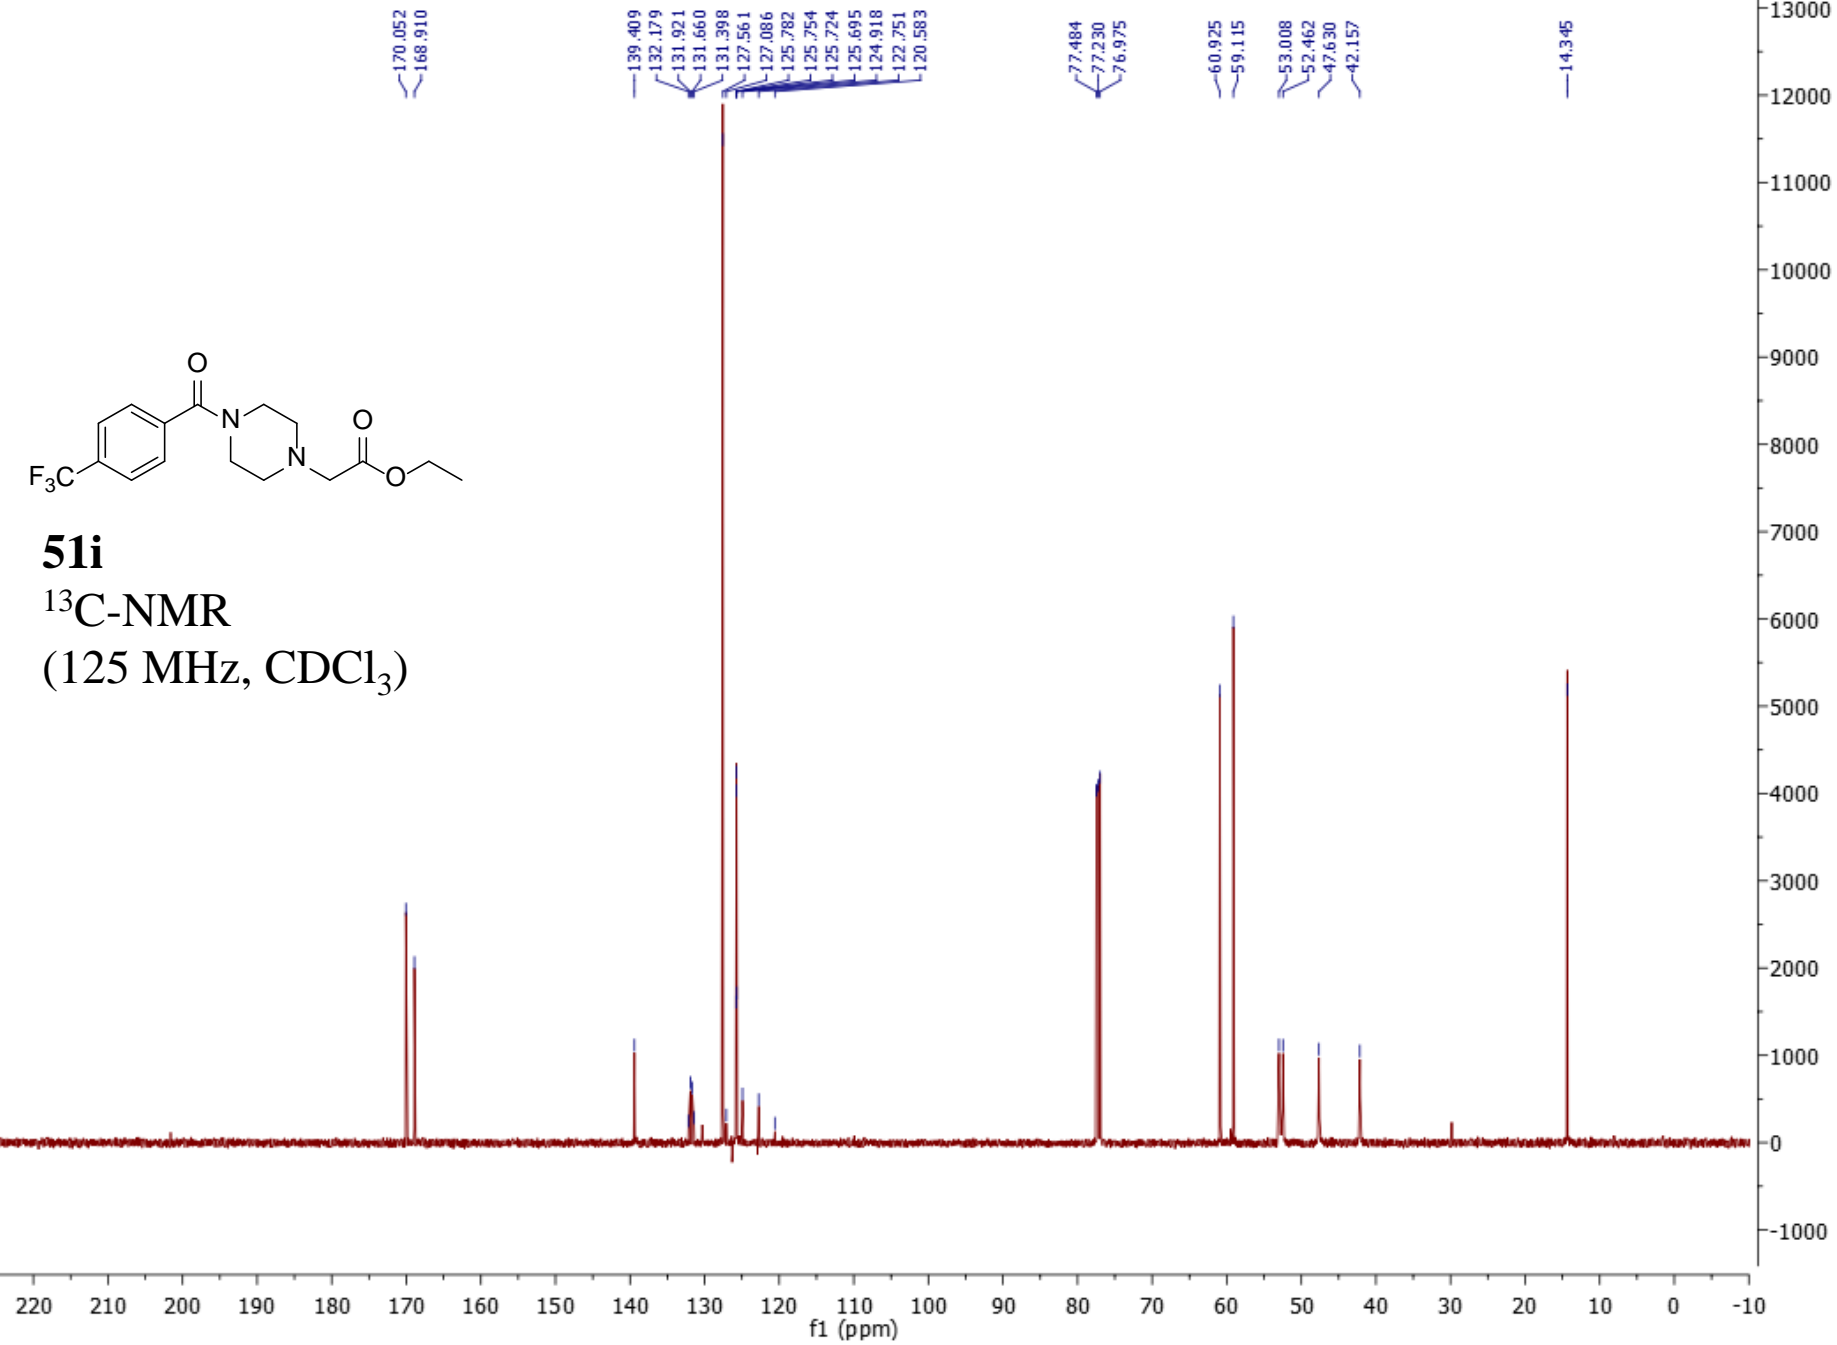

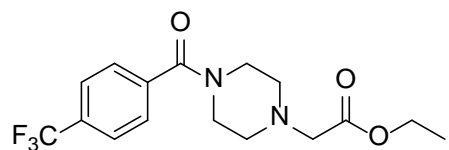

**51i**

$^{19}\text{F}$ -NMR

(470 MHz,  $\text{CDCl}_3$ )

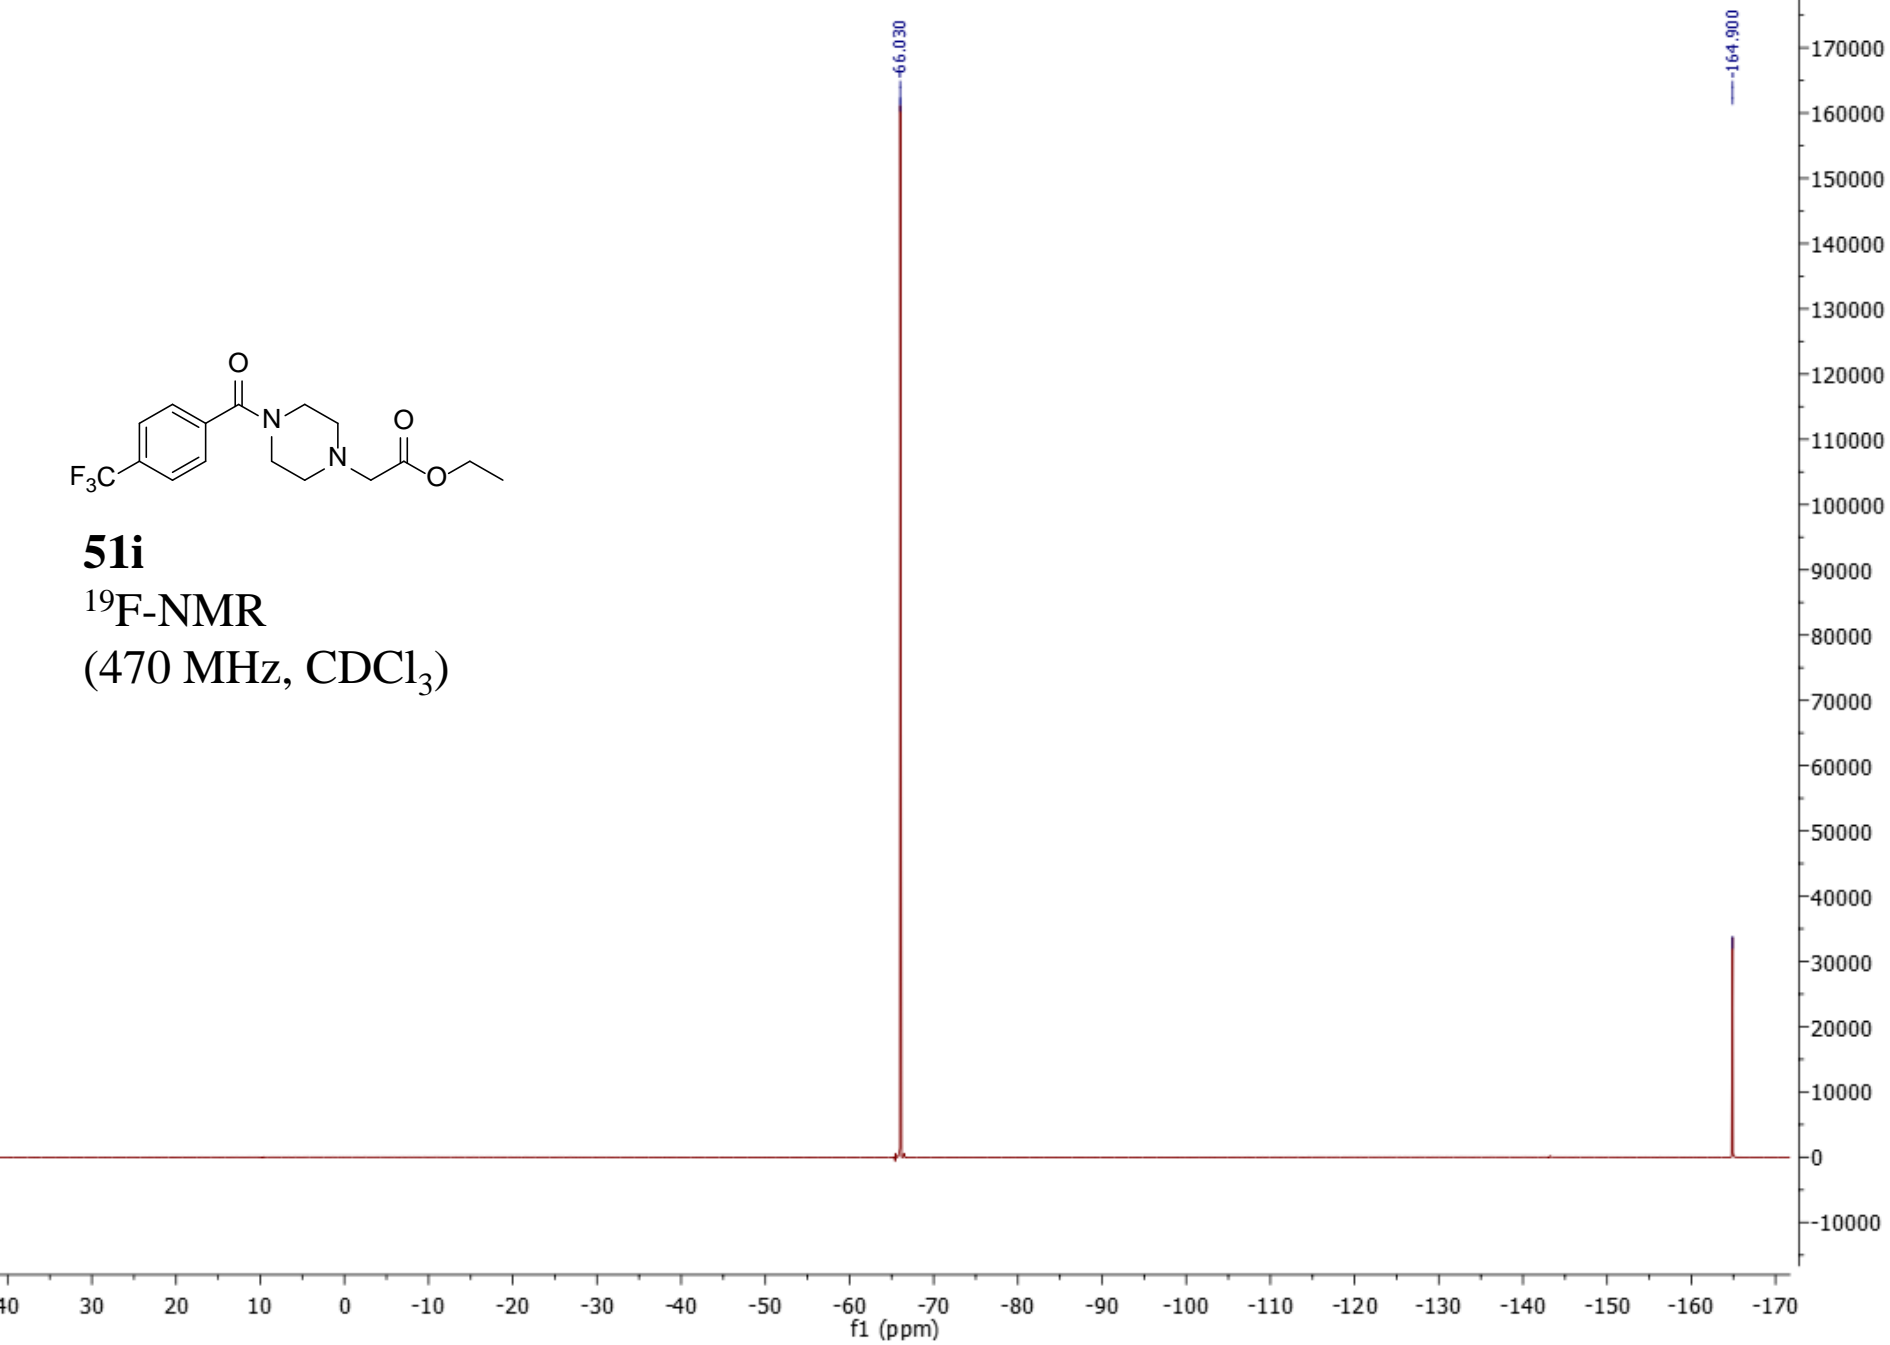



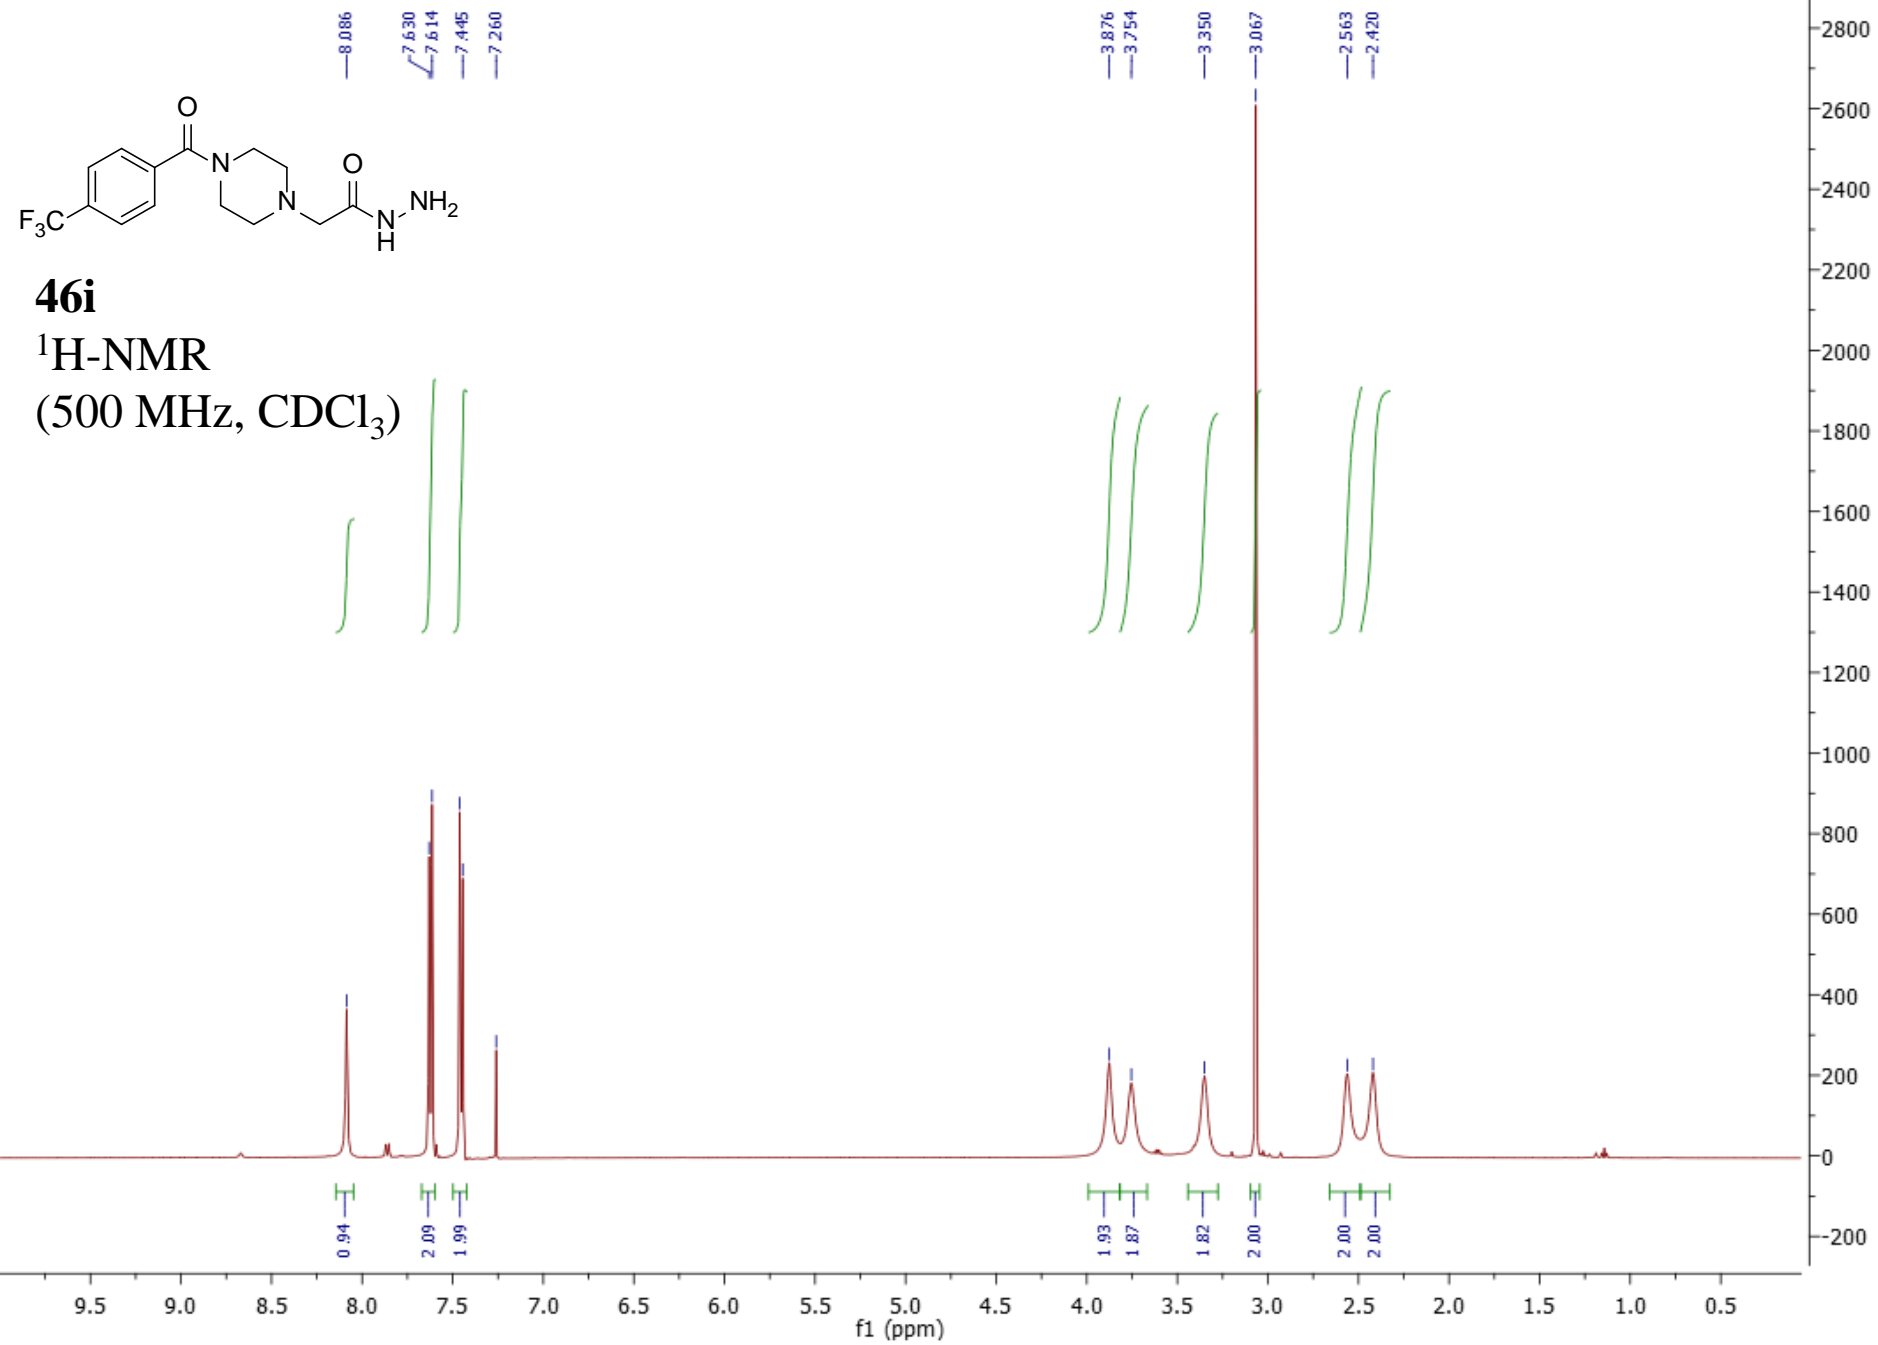

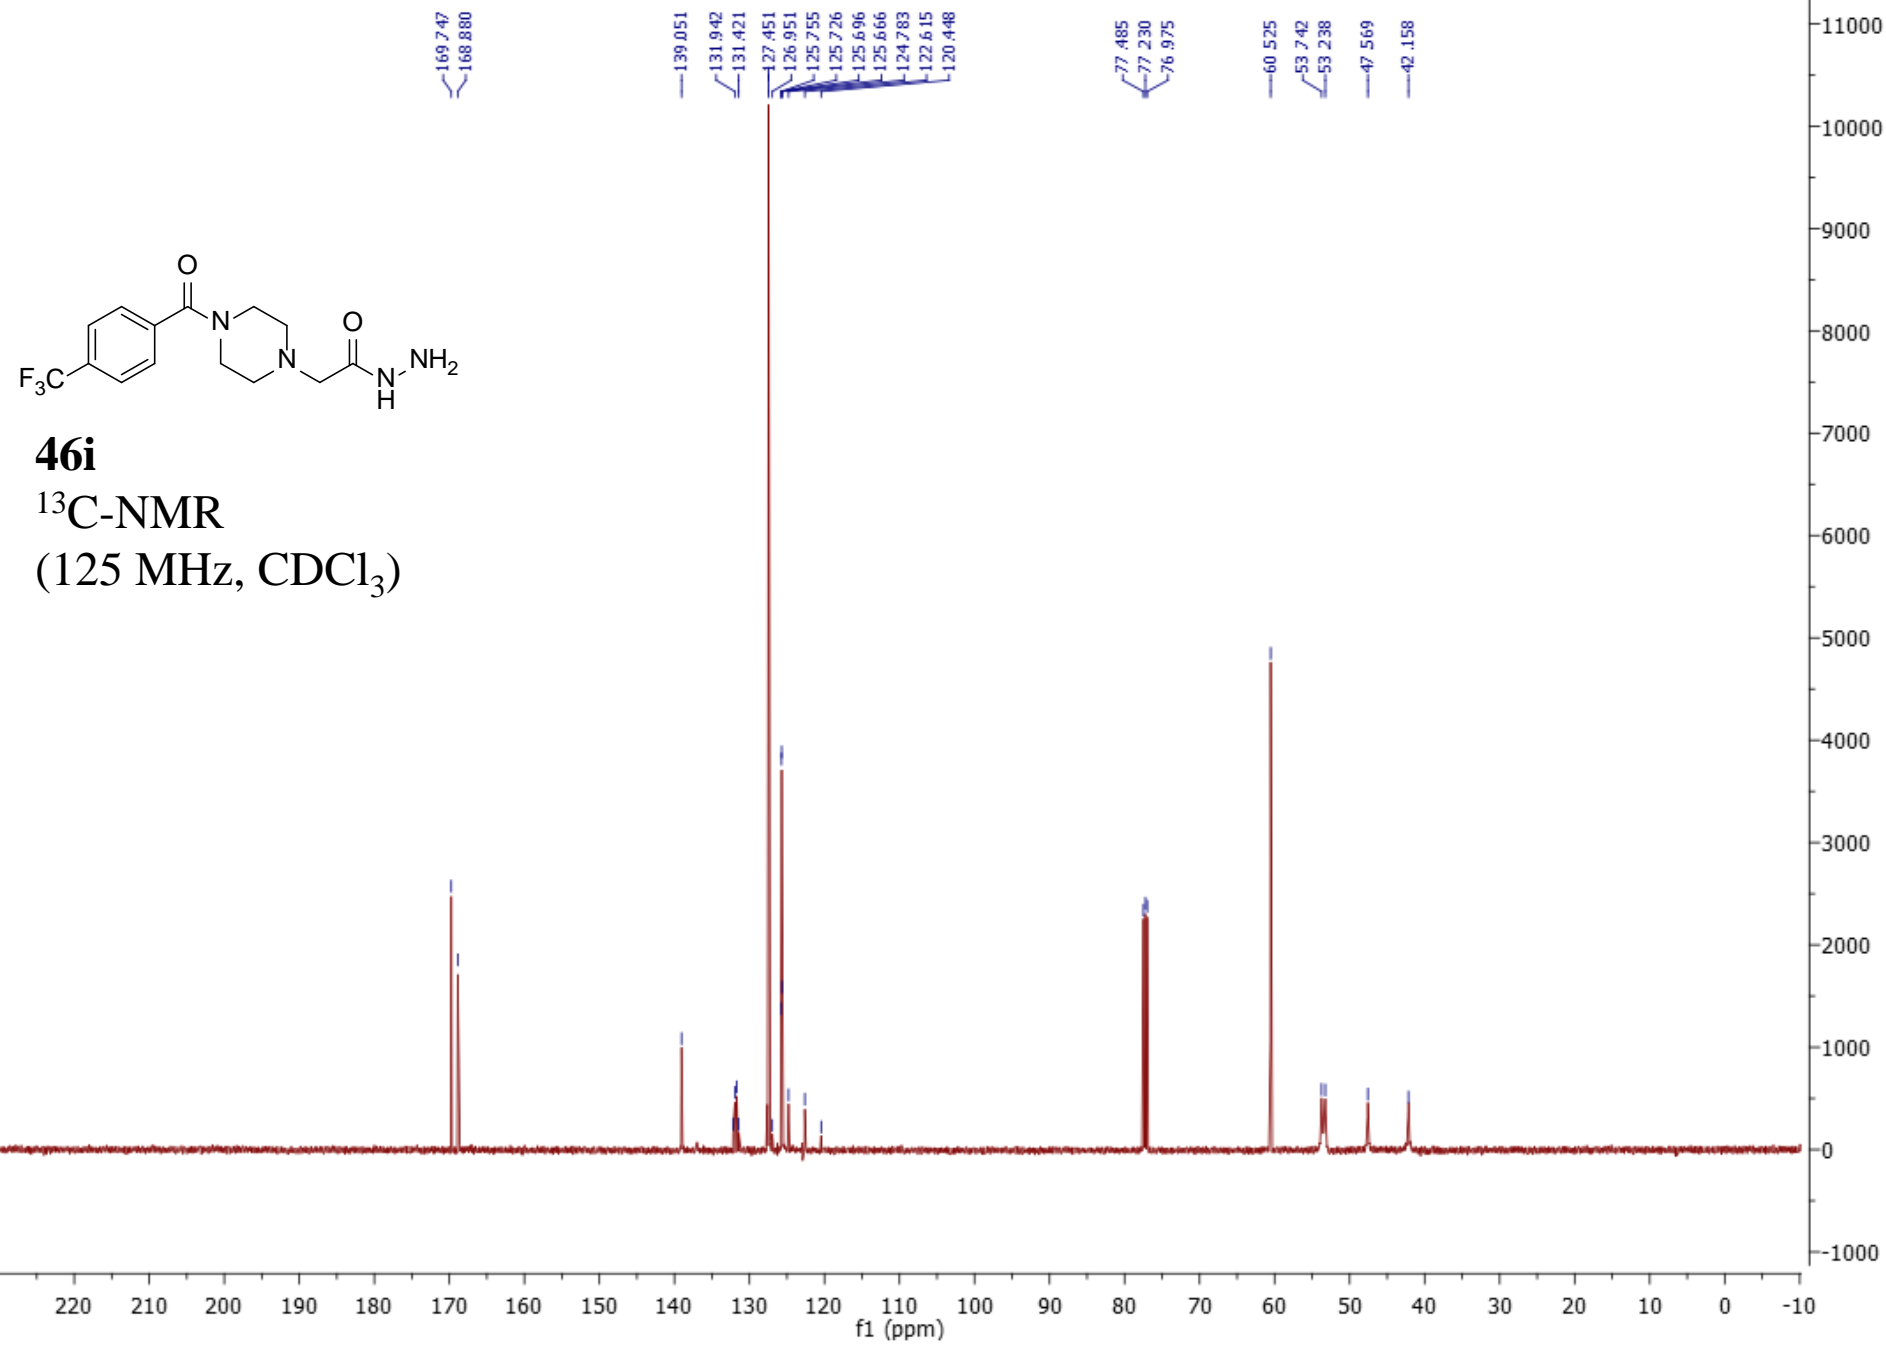

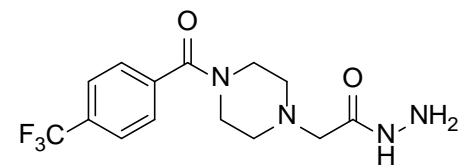

**46i**

<sup>19</sup>F-NMR

(470 MHz, CDCl<sub>3</sub>)

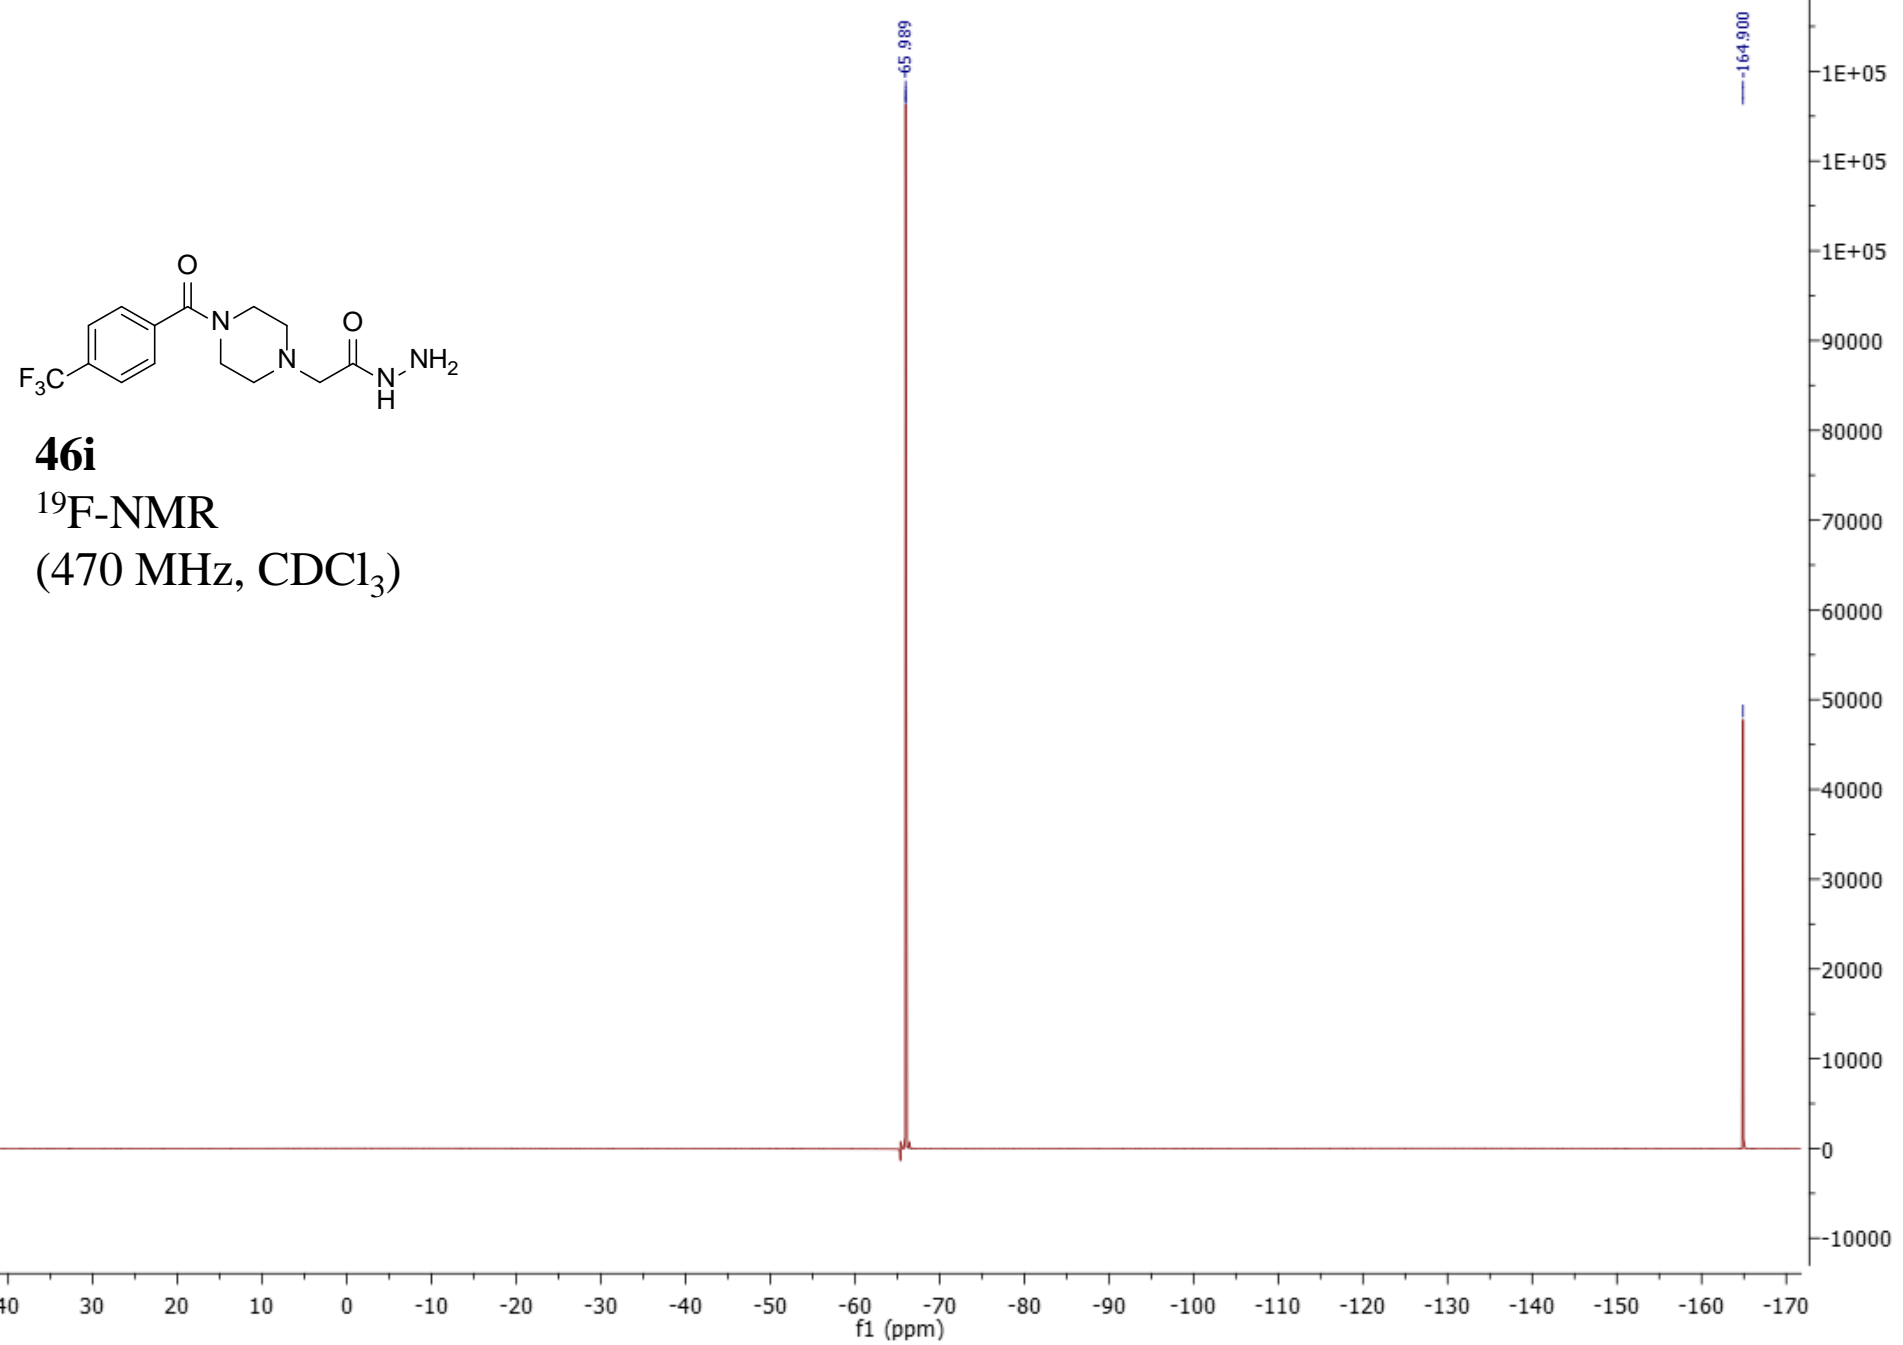

S51

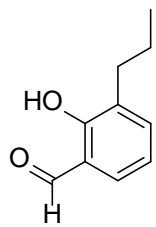

**47b**  
 $^1\text{H-NMR}$   
(500 MHz,  $\text{CDCl}_3$ )

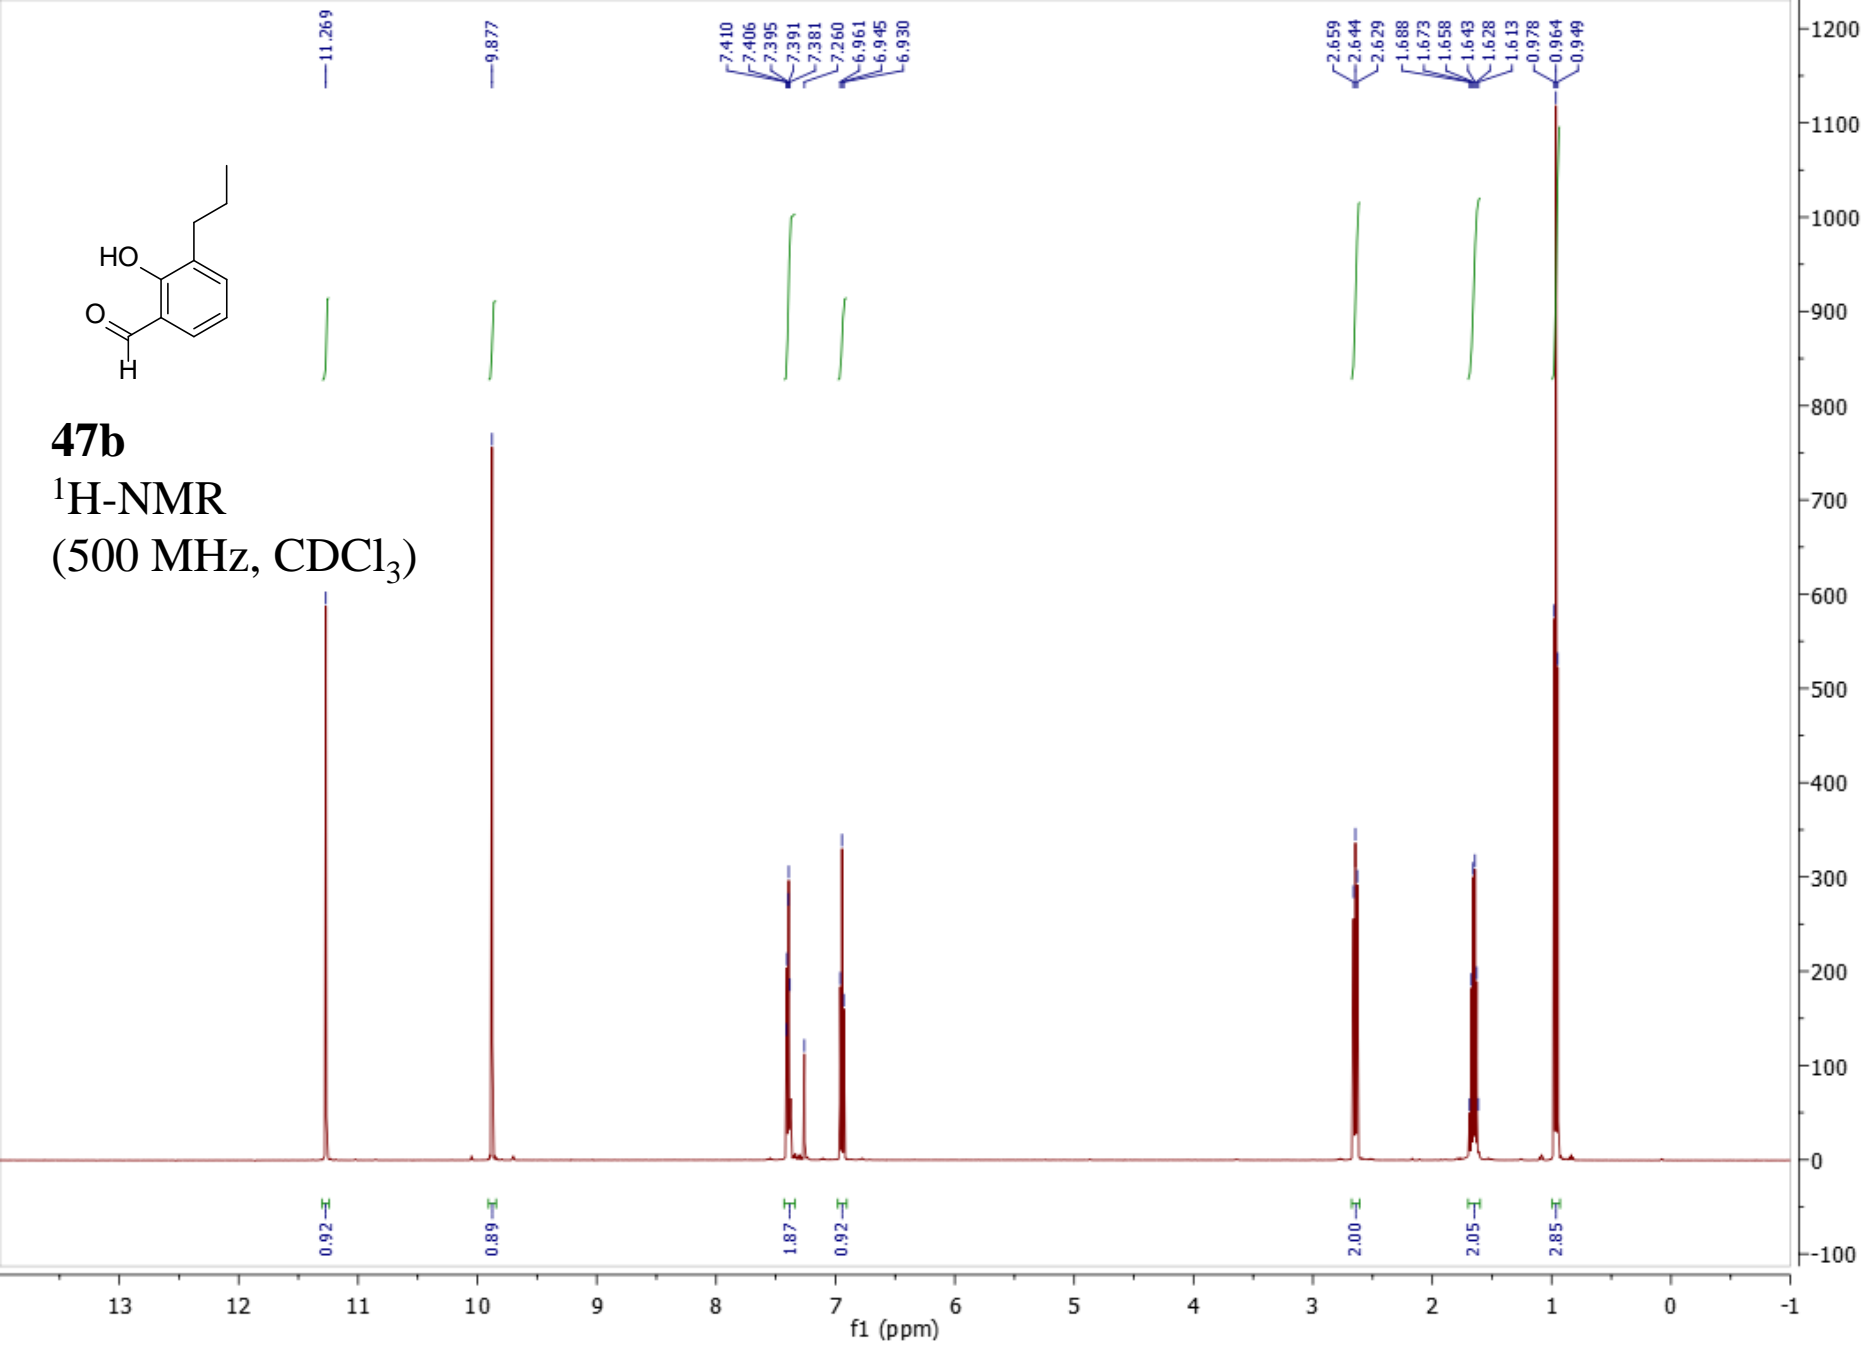

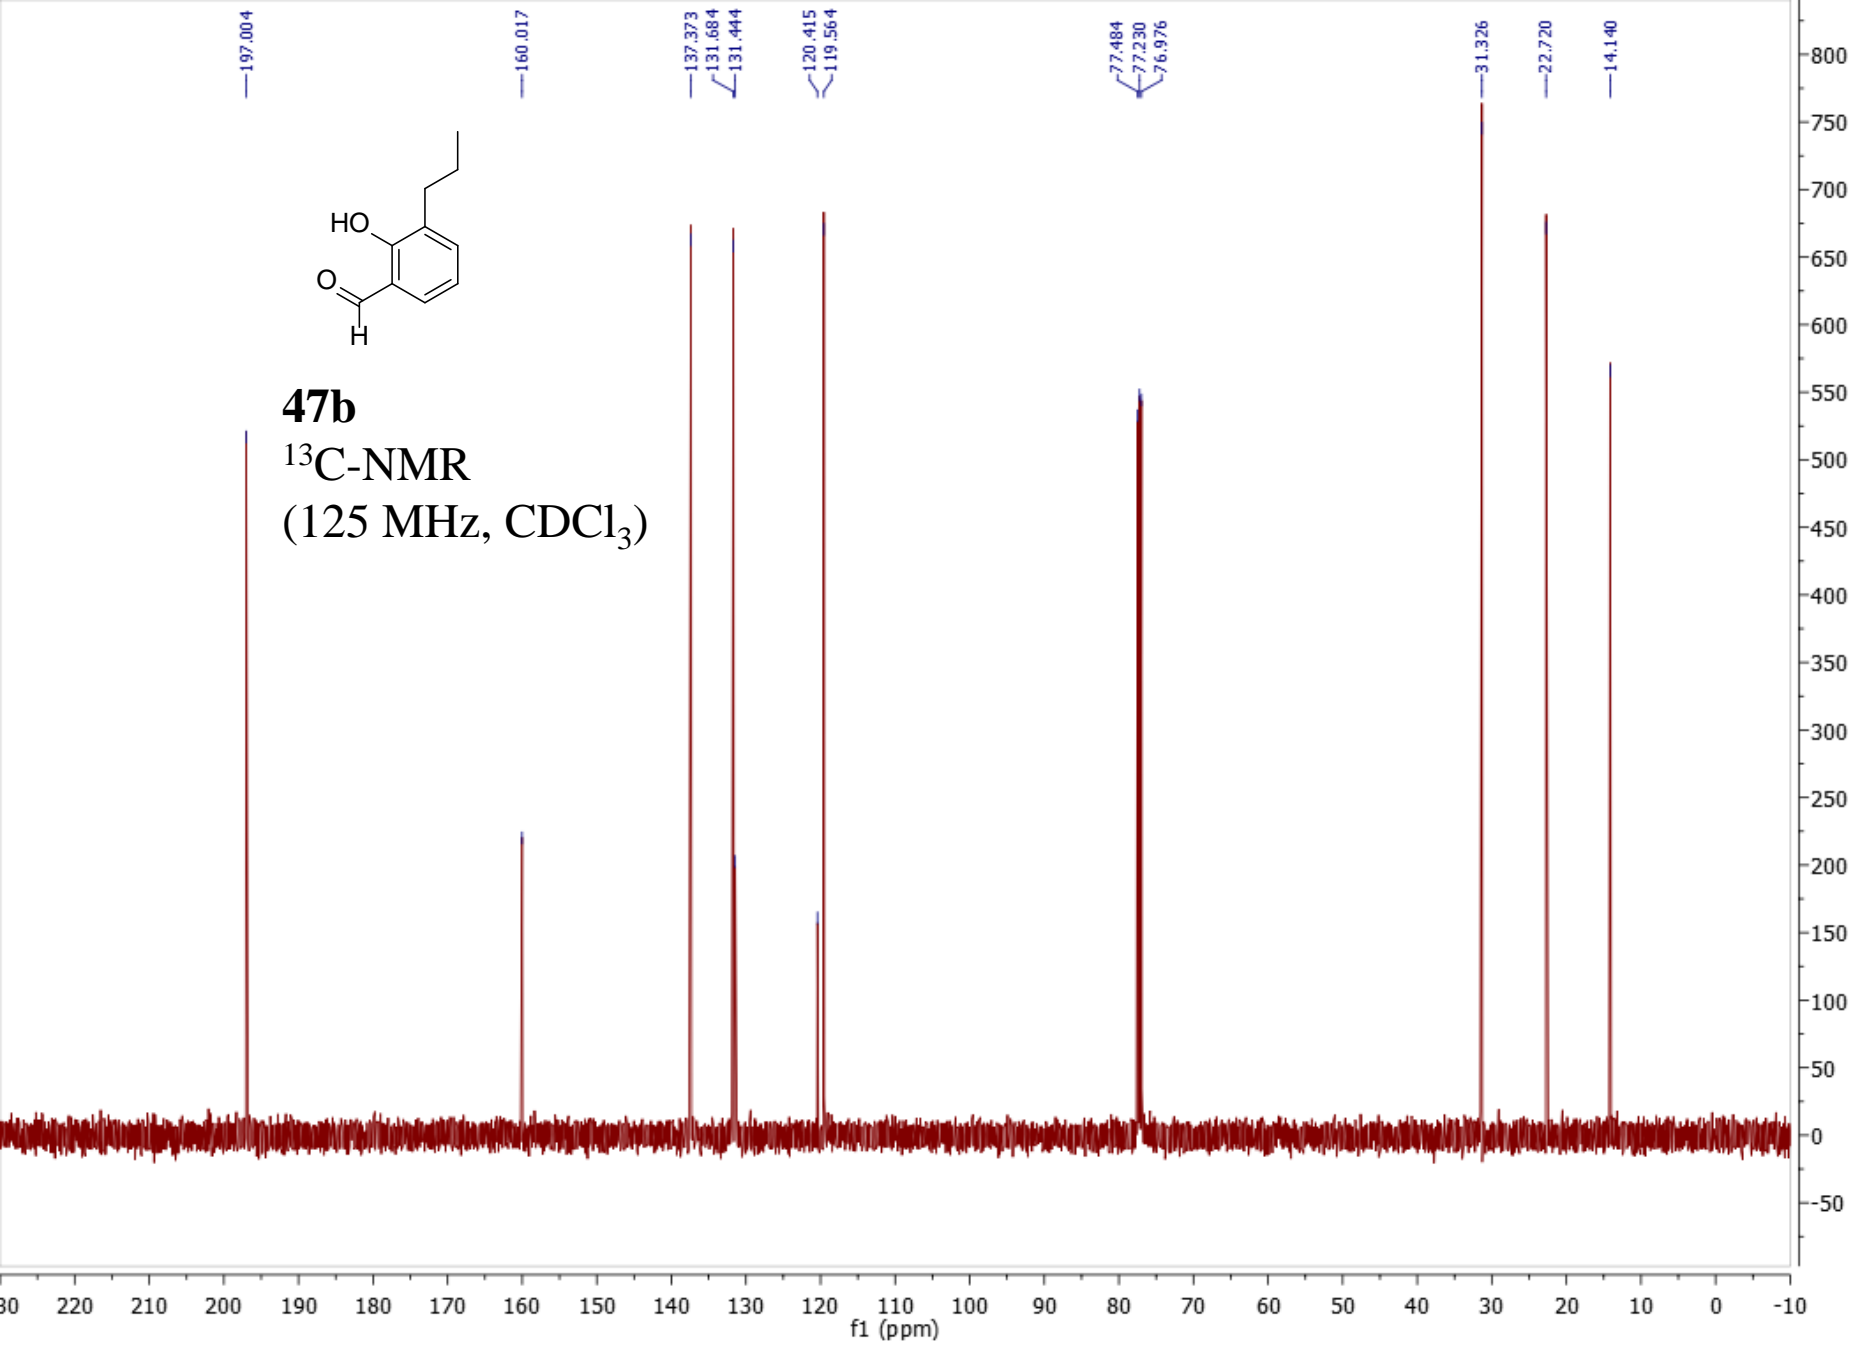

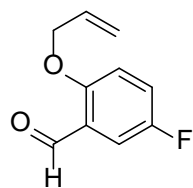

**53b**  
<sup>1</sup>H-NMR  
(500 MHz, CDCl<sub>3</sub>)

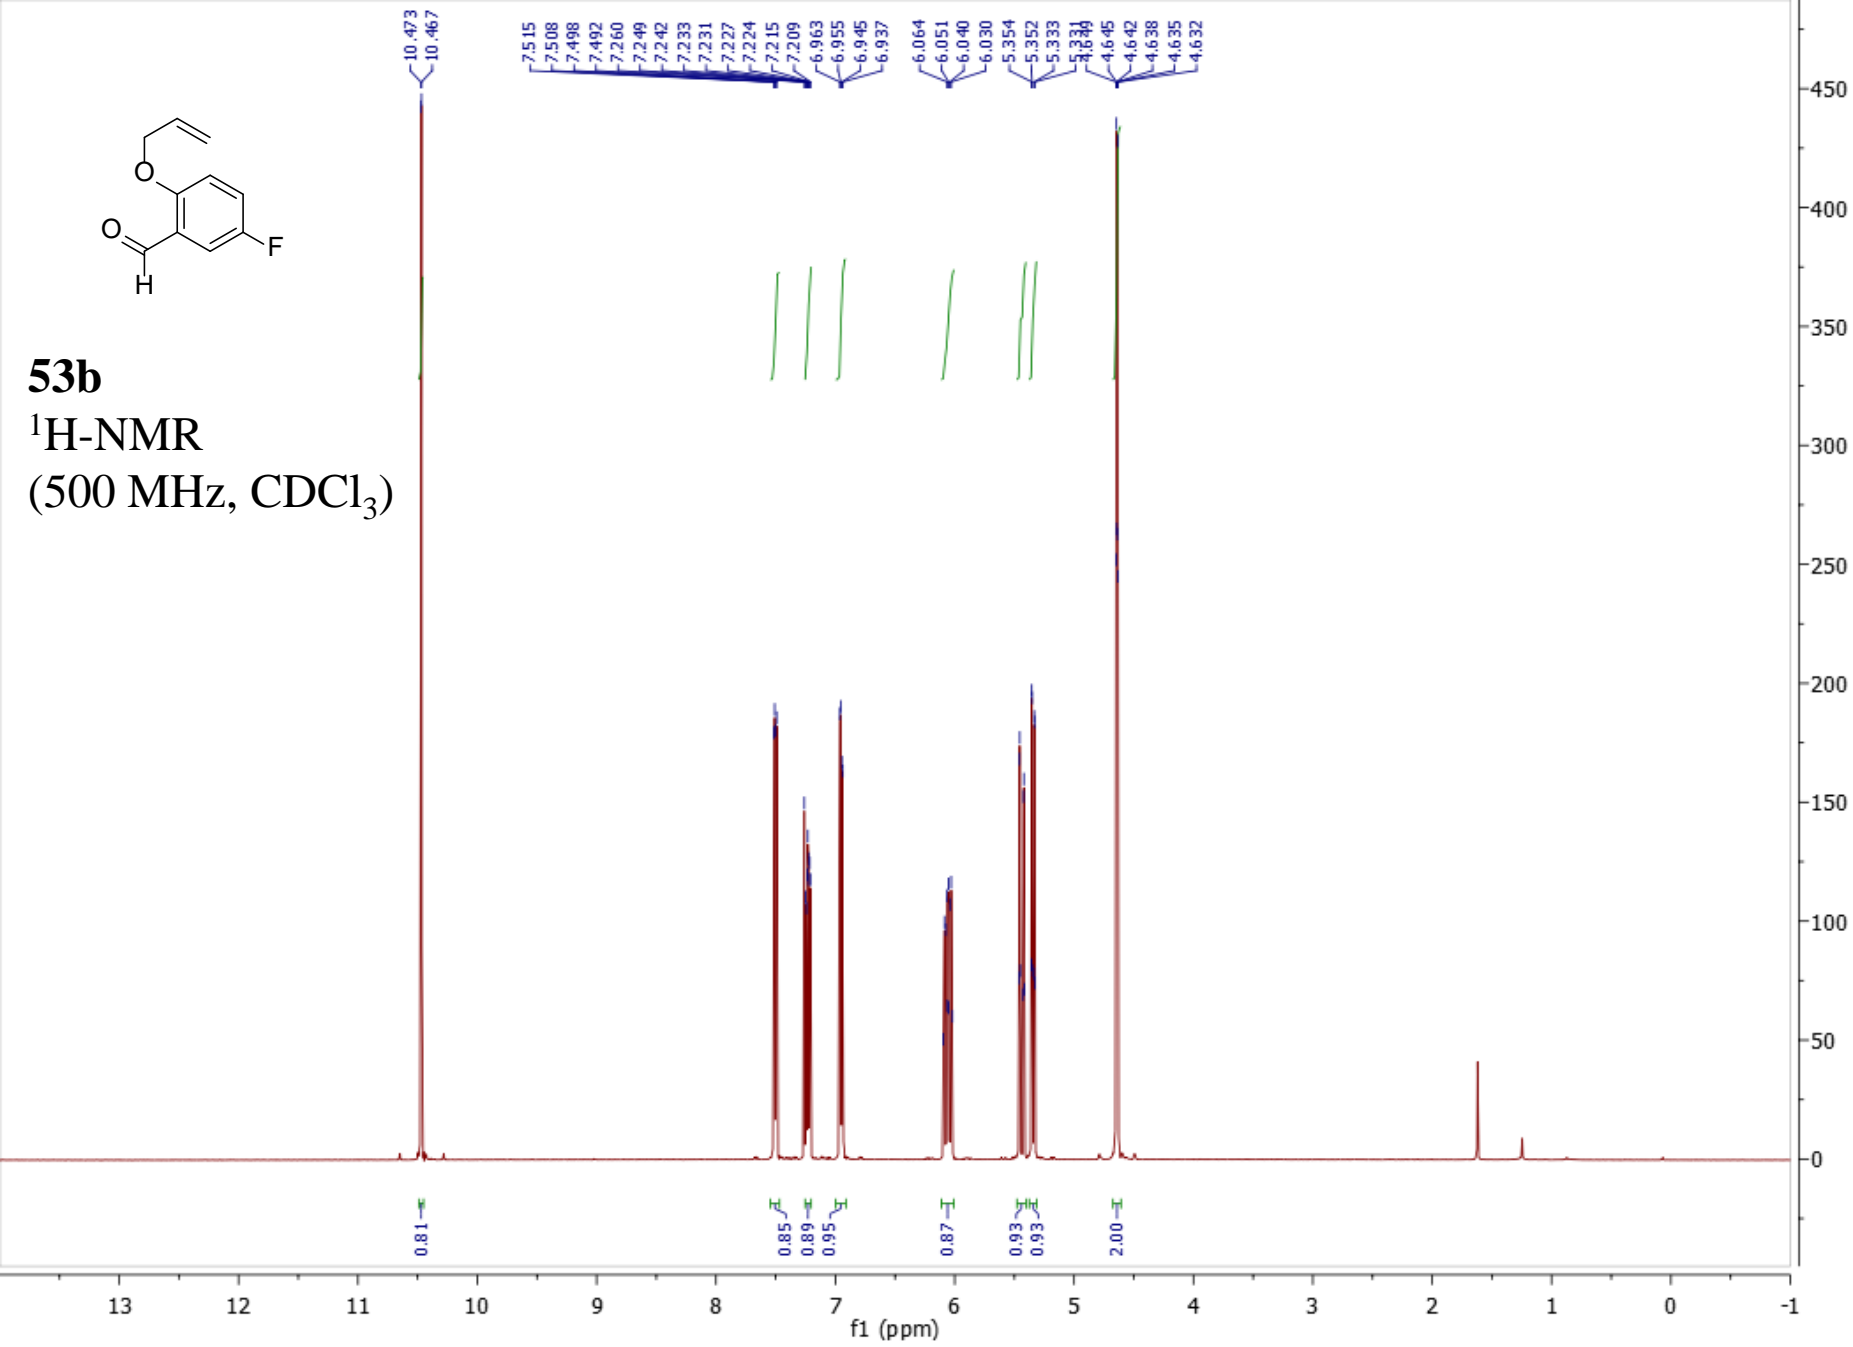

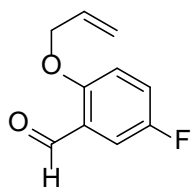

188.848

158.159  
157.437  
157.422  
156.235

132.395  
126.094  
126.047  
122.693  
122.503  
118.552  
114.825  
114.768  
114.315  
114.130

77.484  
77.230  
76.976  
70.099

**53b**  
<sup>13</sup>C-NMR  
(125 MHz, CDCl<sub>3</sub>)

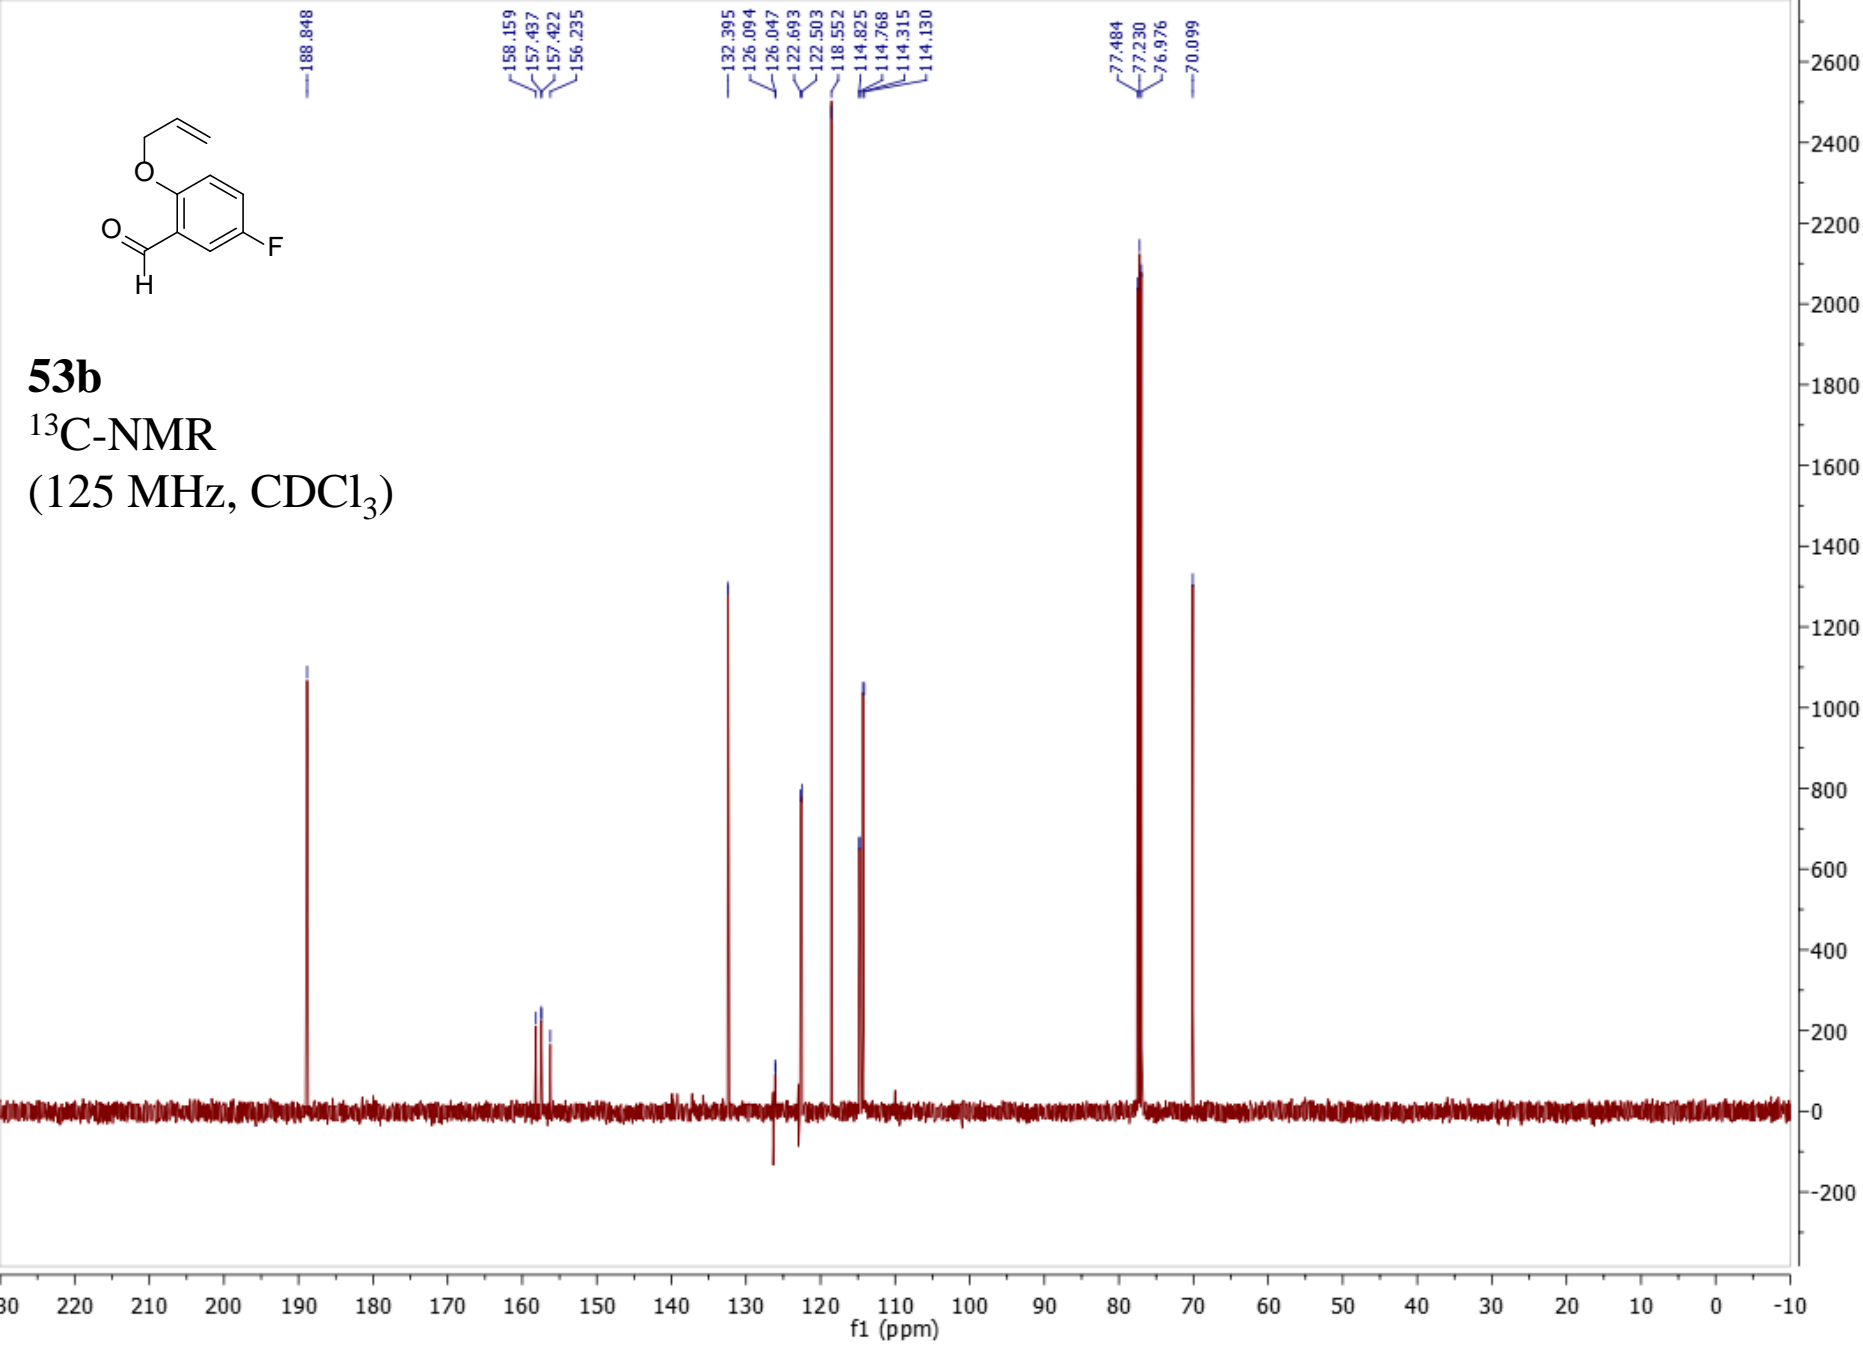

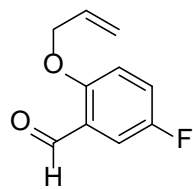

**53b**

$^{19}\text{F}$ -NMR  
(470 MHz,  $\text{CDCl}_3$ )

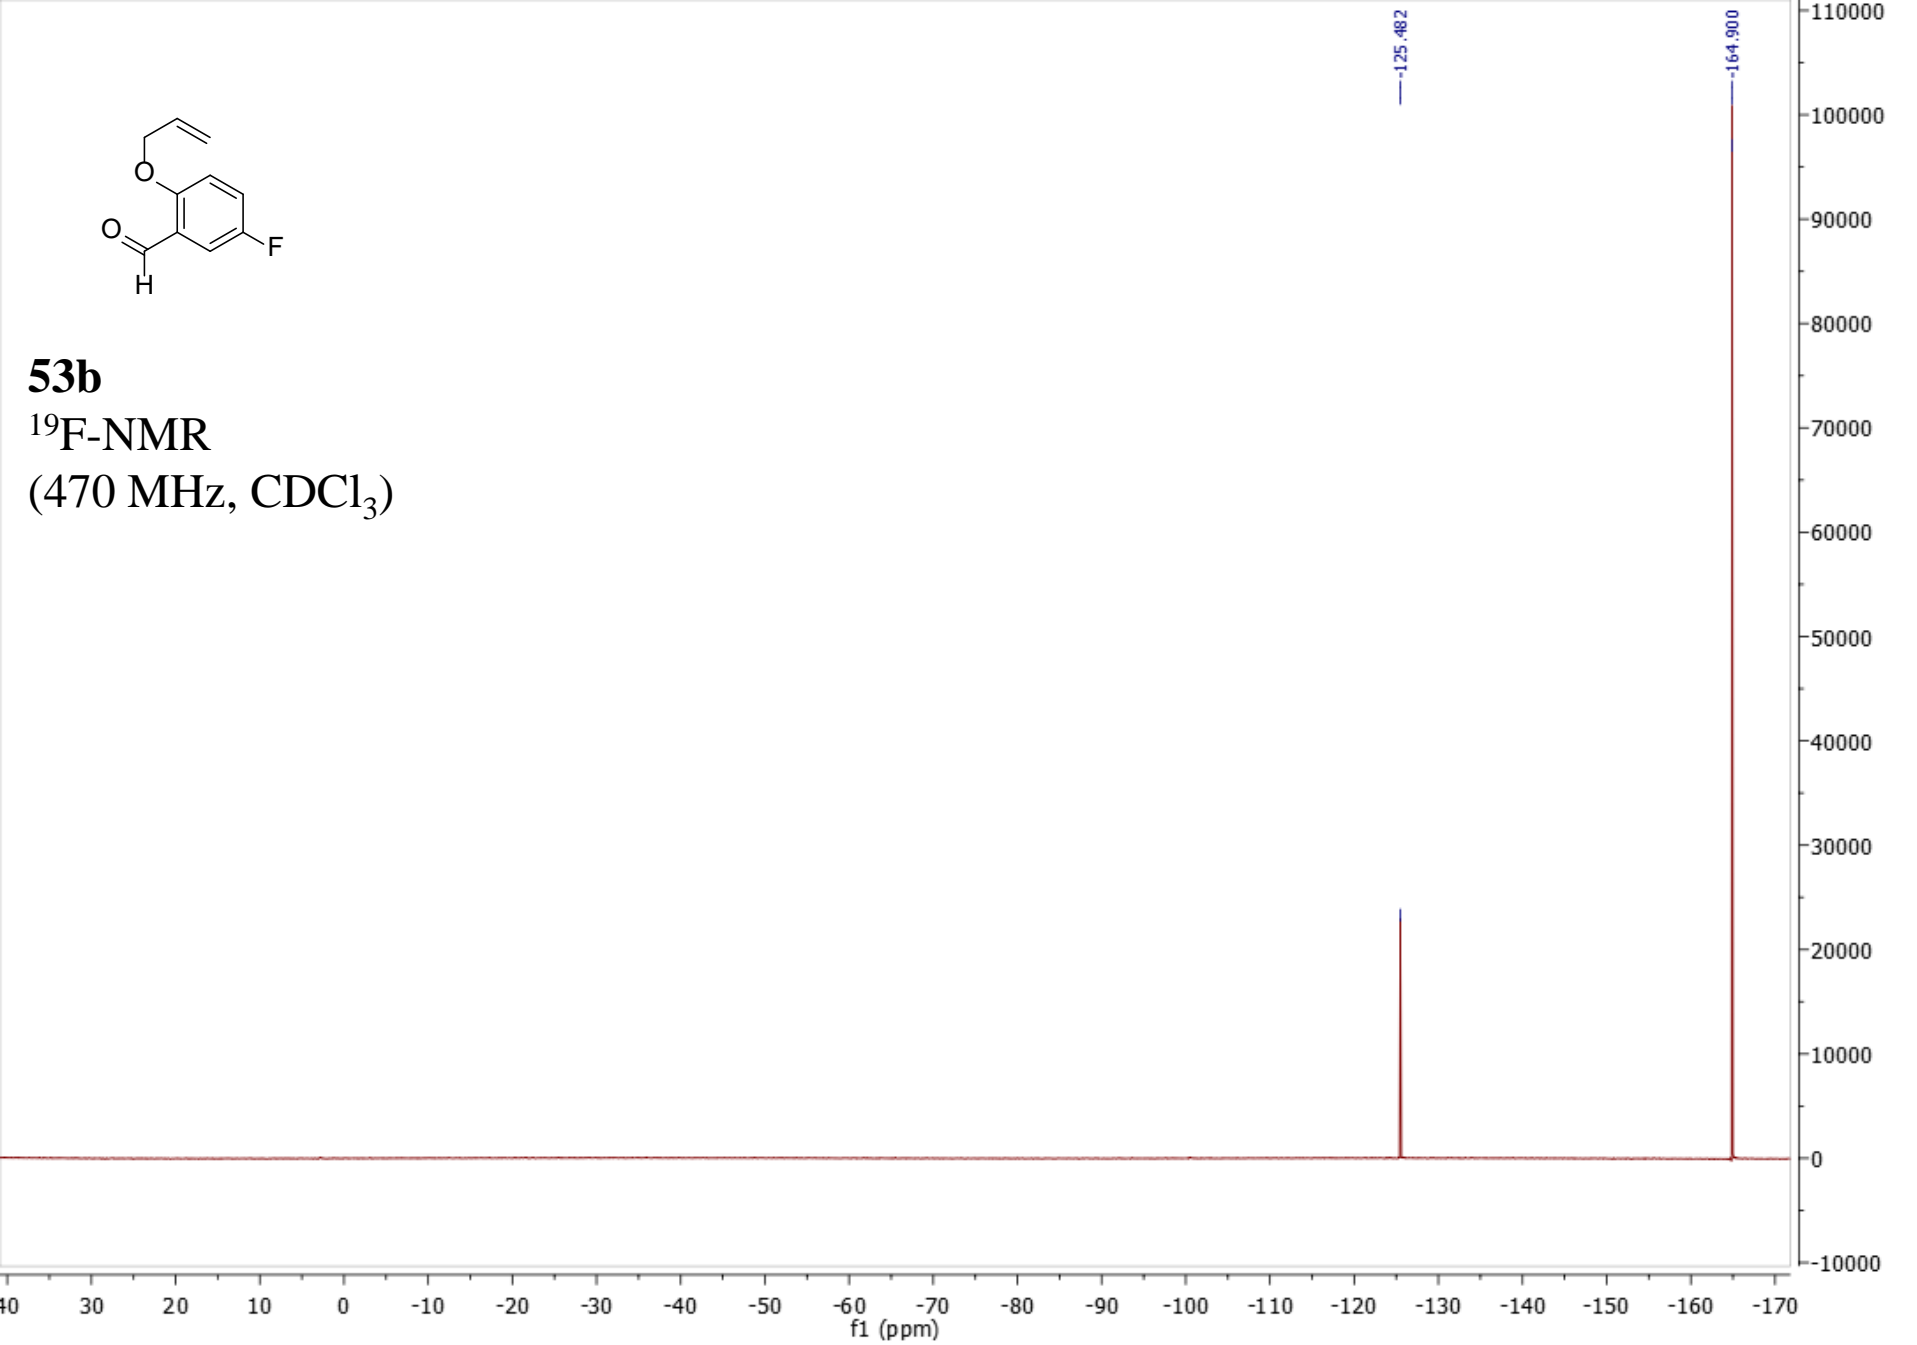



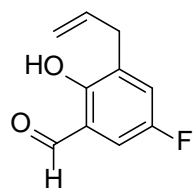

**47d**  
<sup>1</sup>H-NMR  
(500 MHz, CDCl<sub>3</sub>)

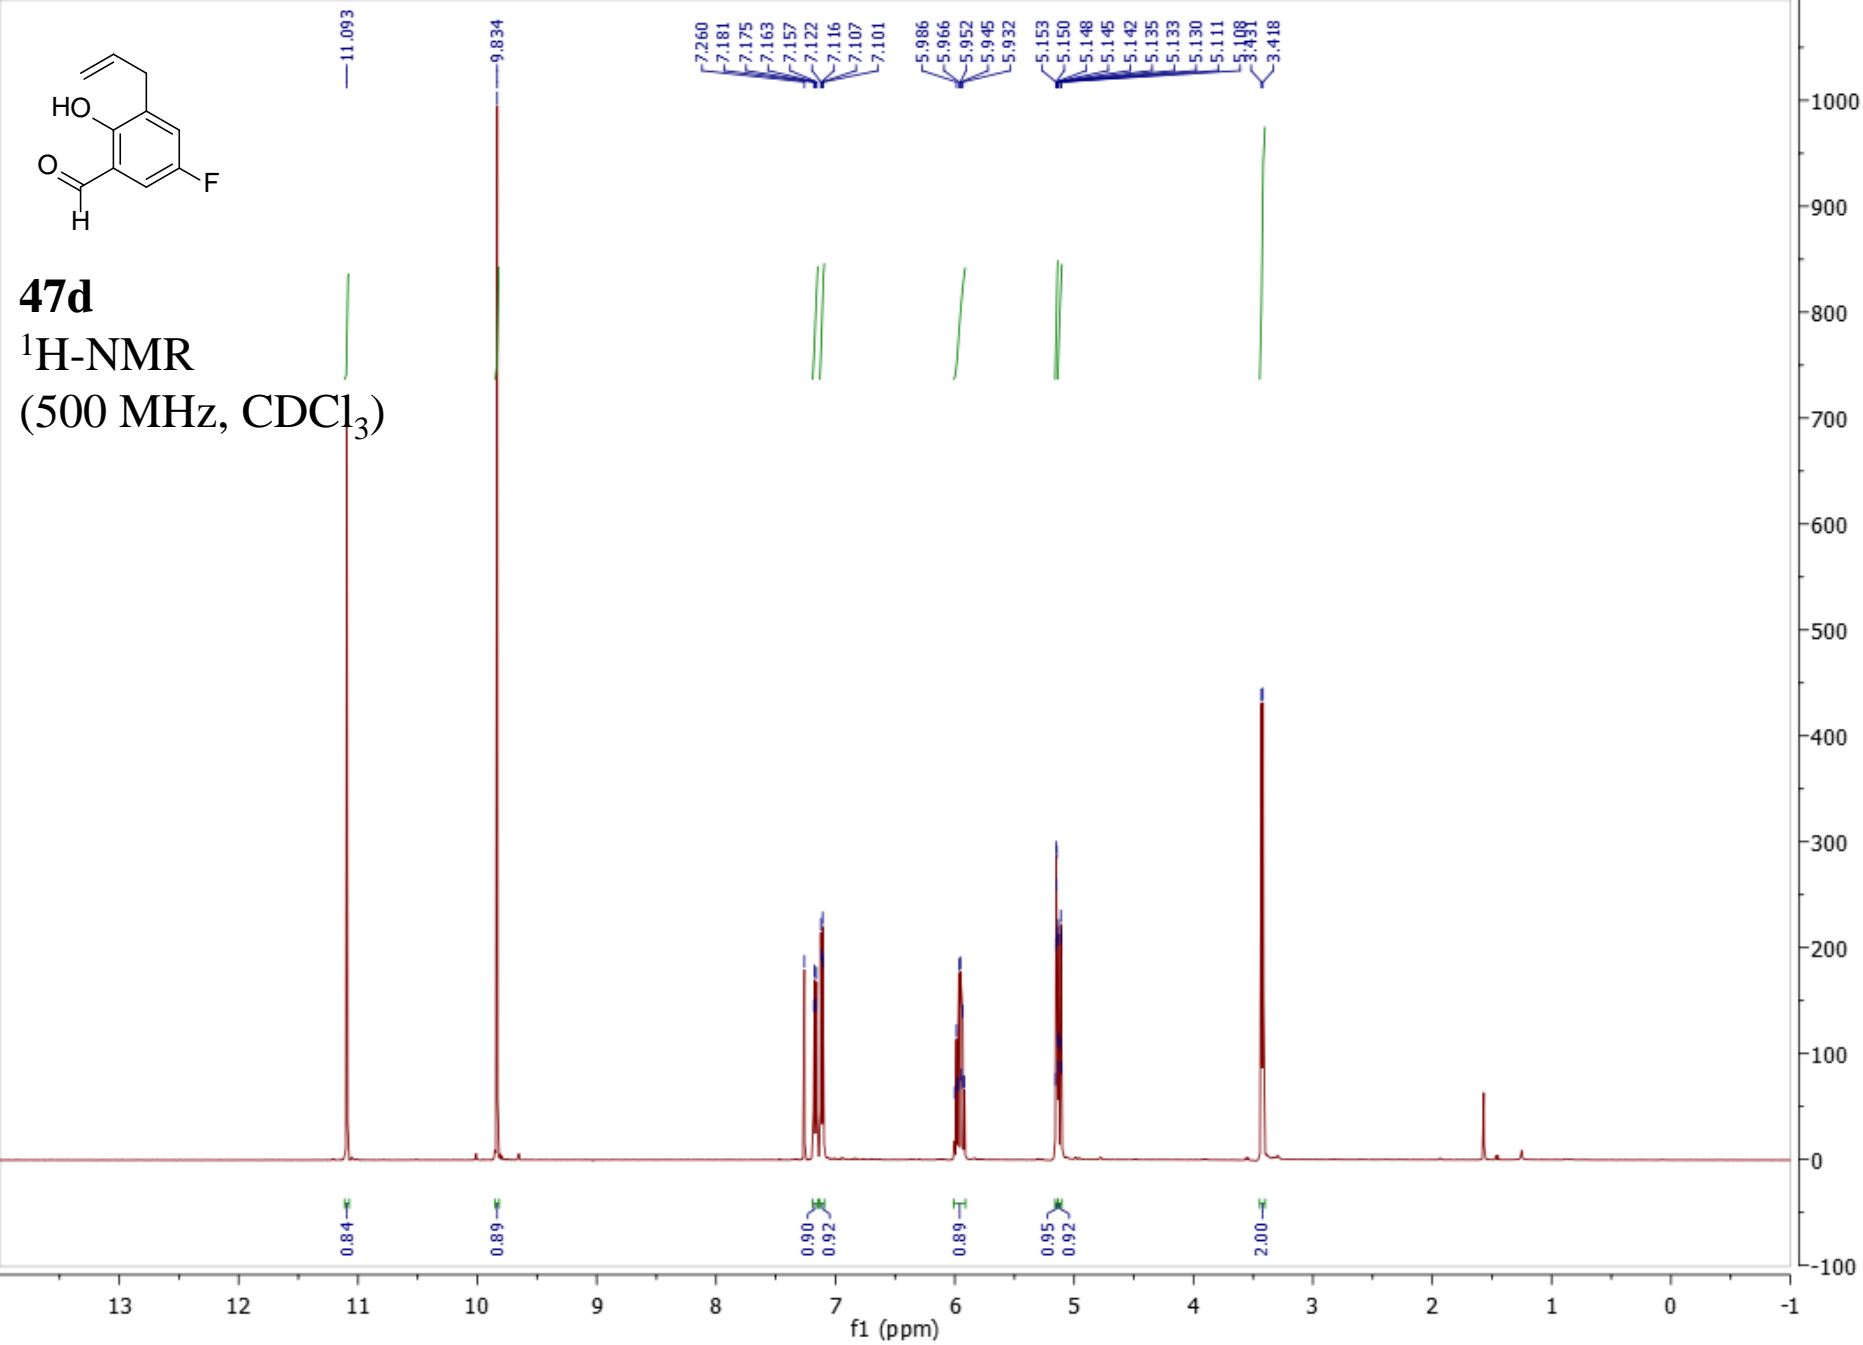

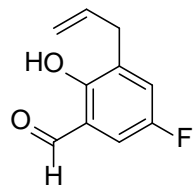

195.882  
195.862

156.616  
156.043  
156.035  
154.706

135.061  
131.596  
131.545  
124.907  
124.718  
119.804  
119.753  
117.313  
116.051  
115.873

77.485  
77.230  
76.976

33.156

**47d**  
<sup>13</sup>C-NMR  
(125 MHz, CDCl<sub>3</sub>)

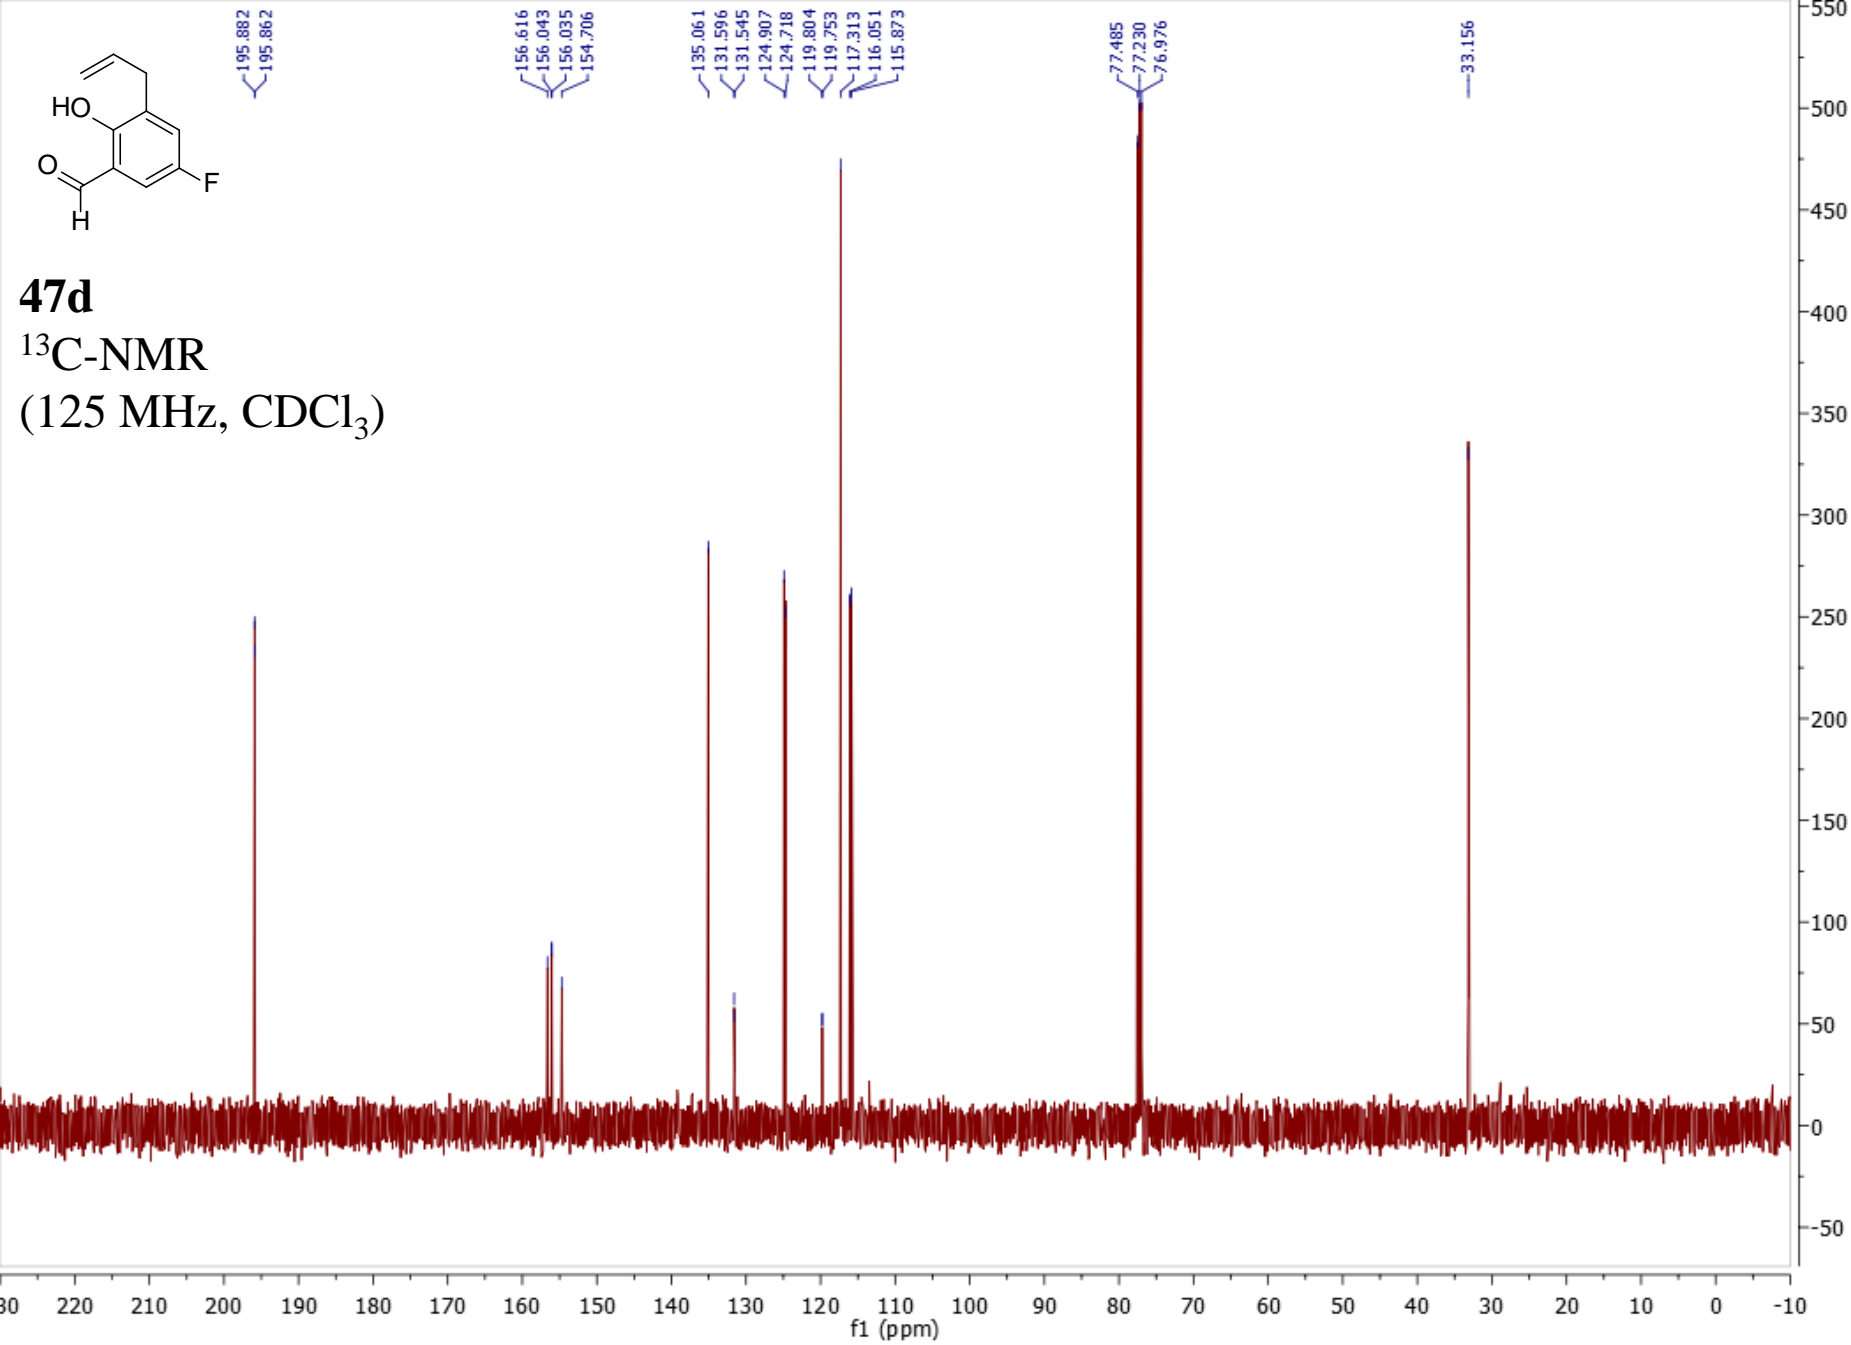

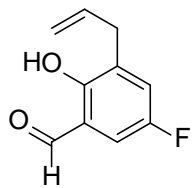

**47d**

<sup>19</sup>F-NMR

(470 MHz, CDCl<sub>3</sub>)

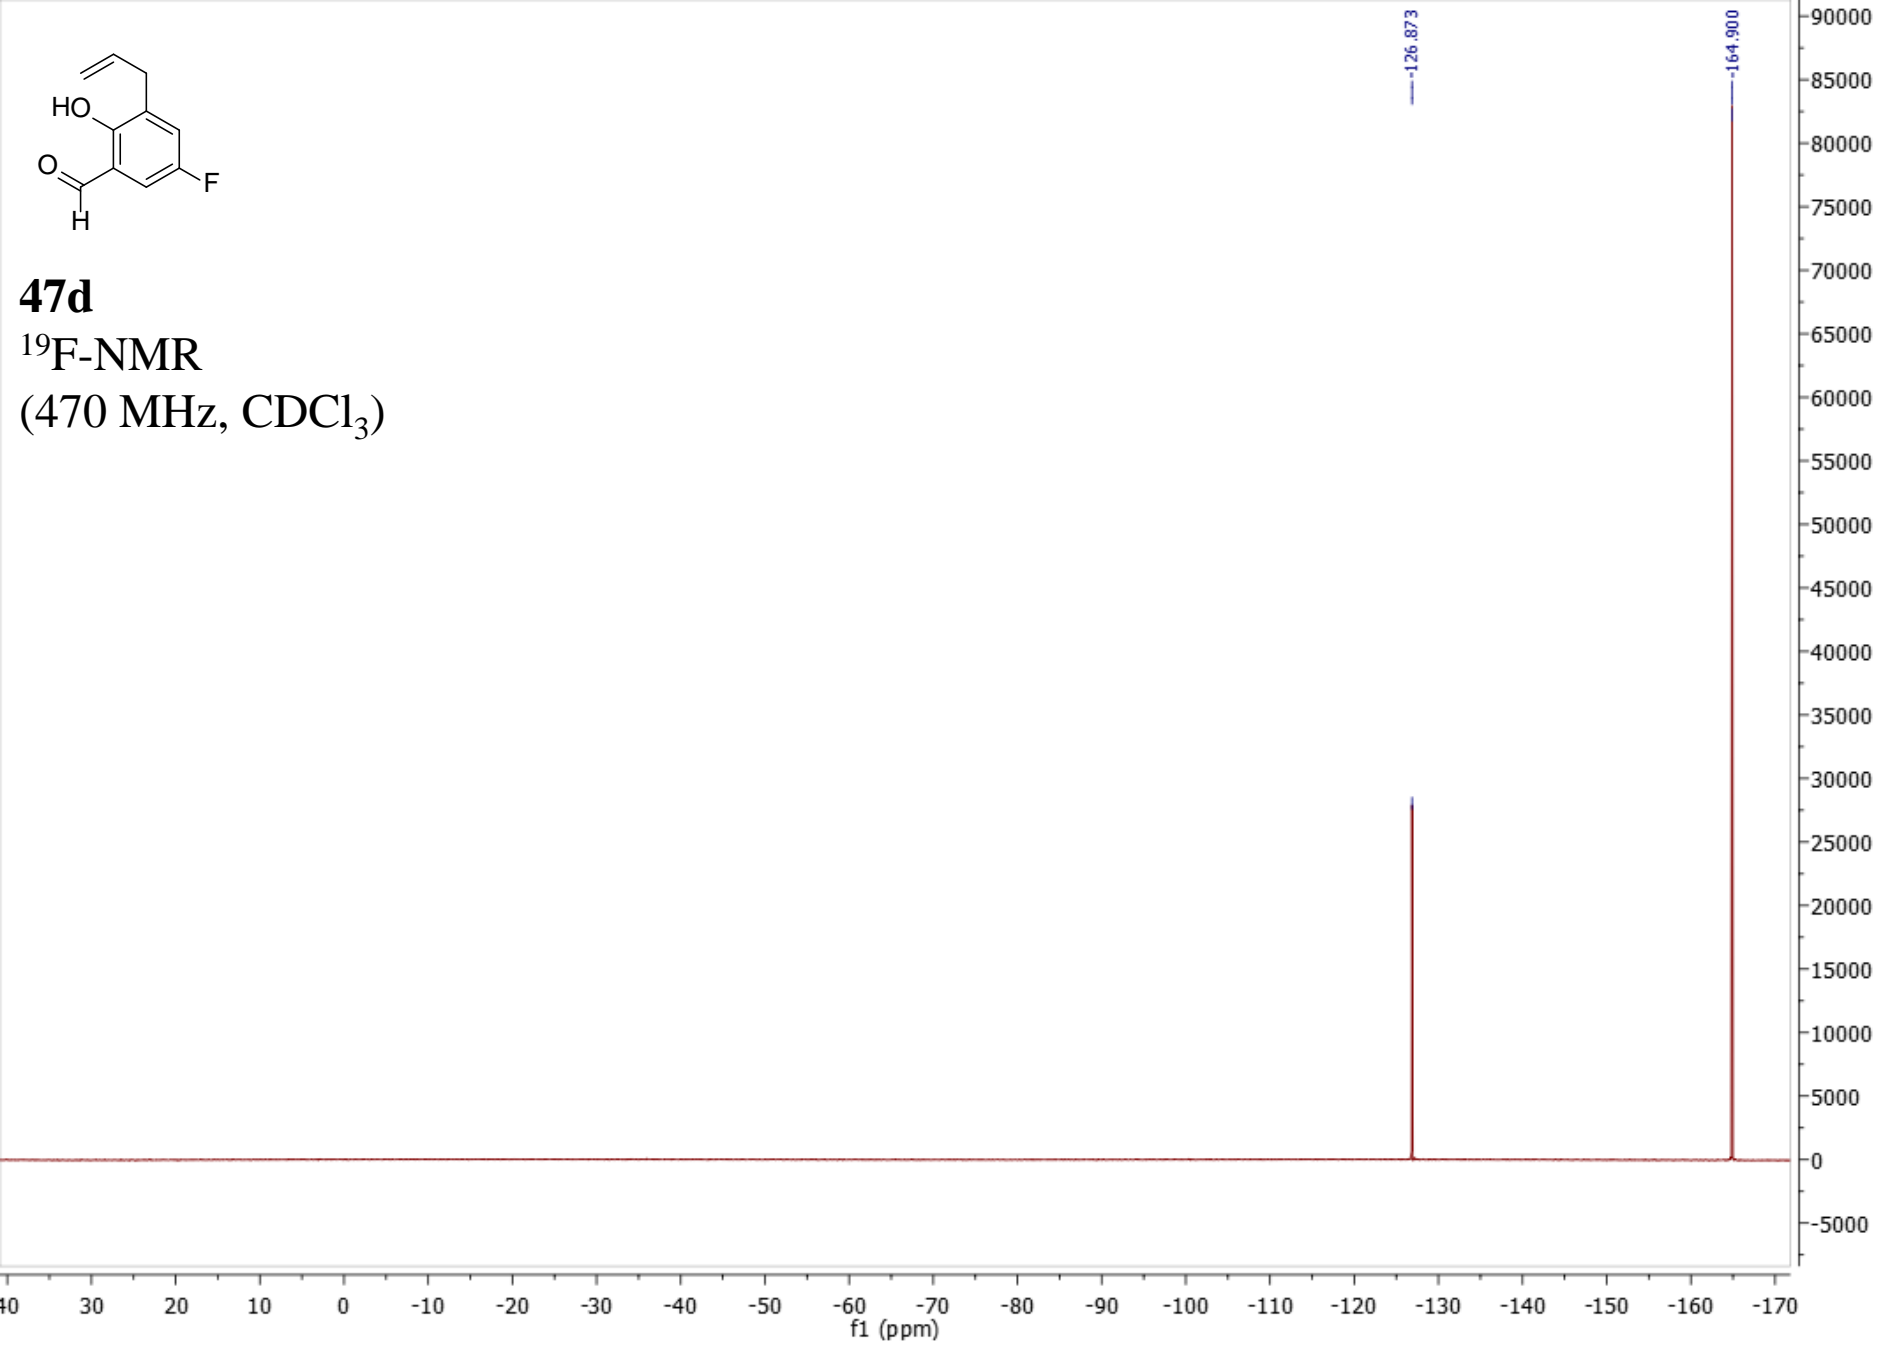

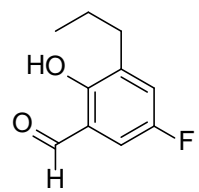

**47e**  
<sup>1</sup>H-NMR  
(500 MHz, CDCl<sub>3</sub>)

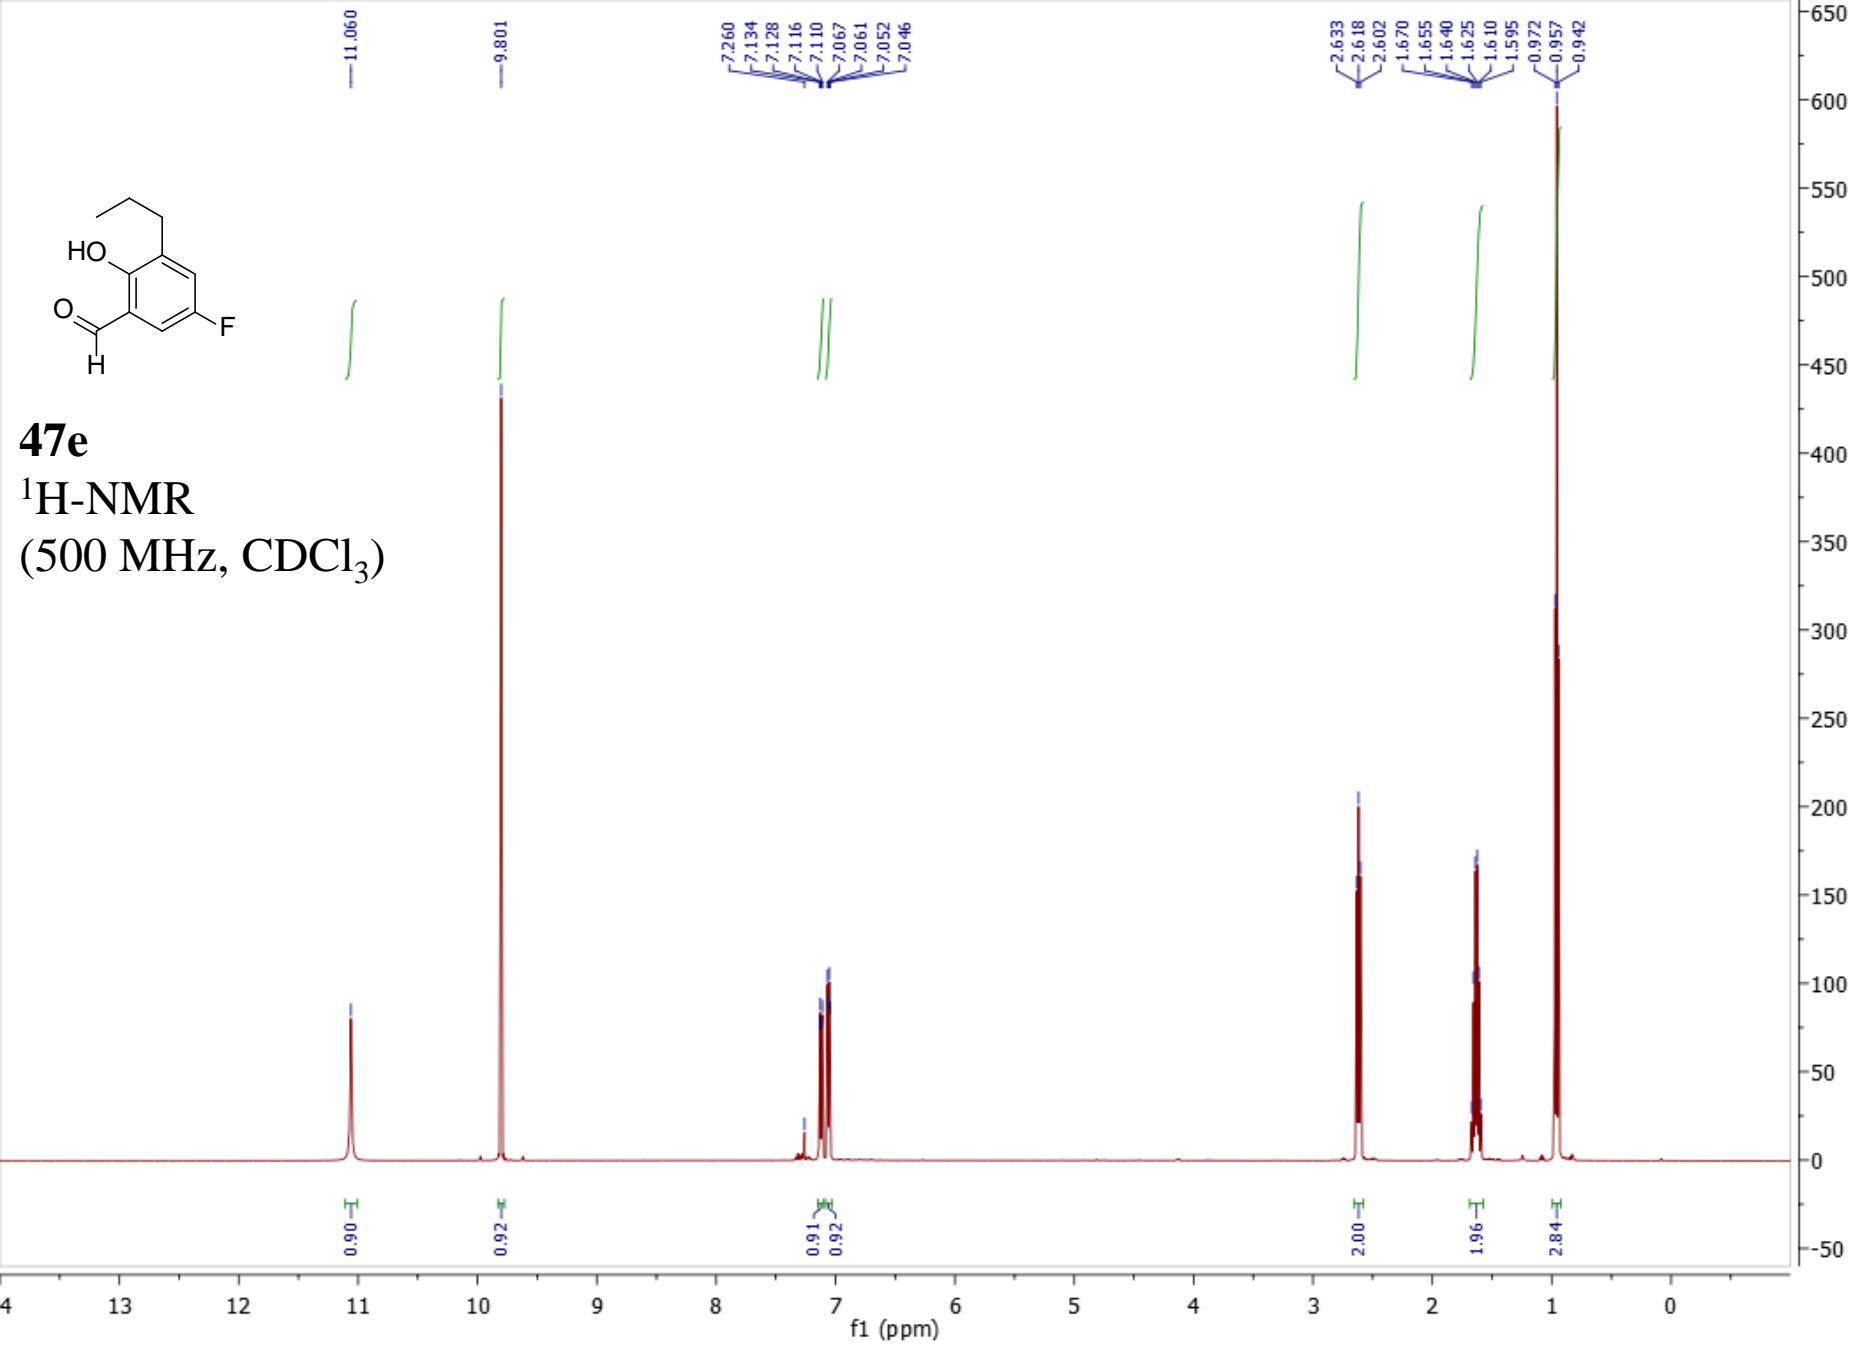

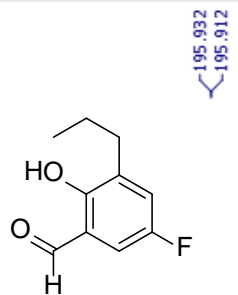

**47e**

$^{13}\text{C}$ -NMR

(125 MHz,  $\text{CDCl}_3$ )

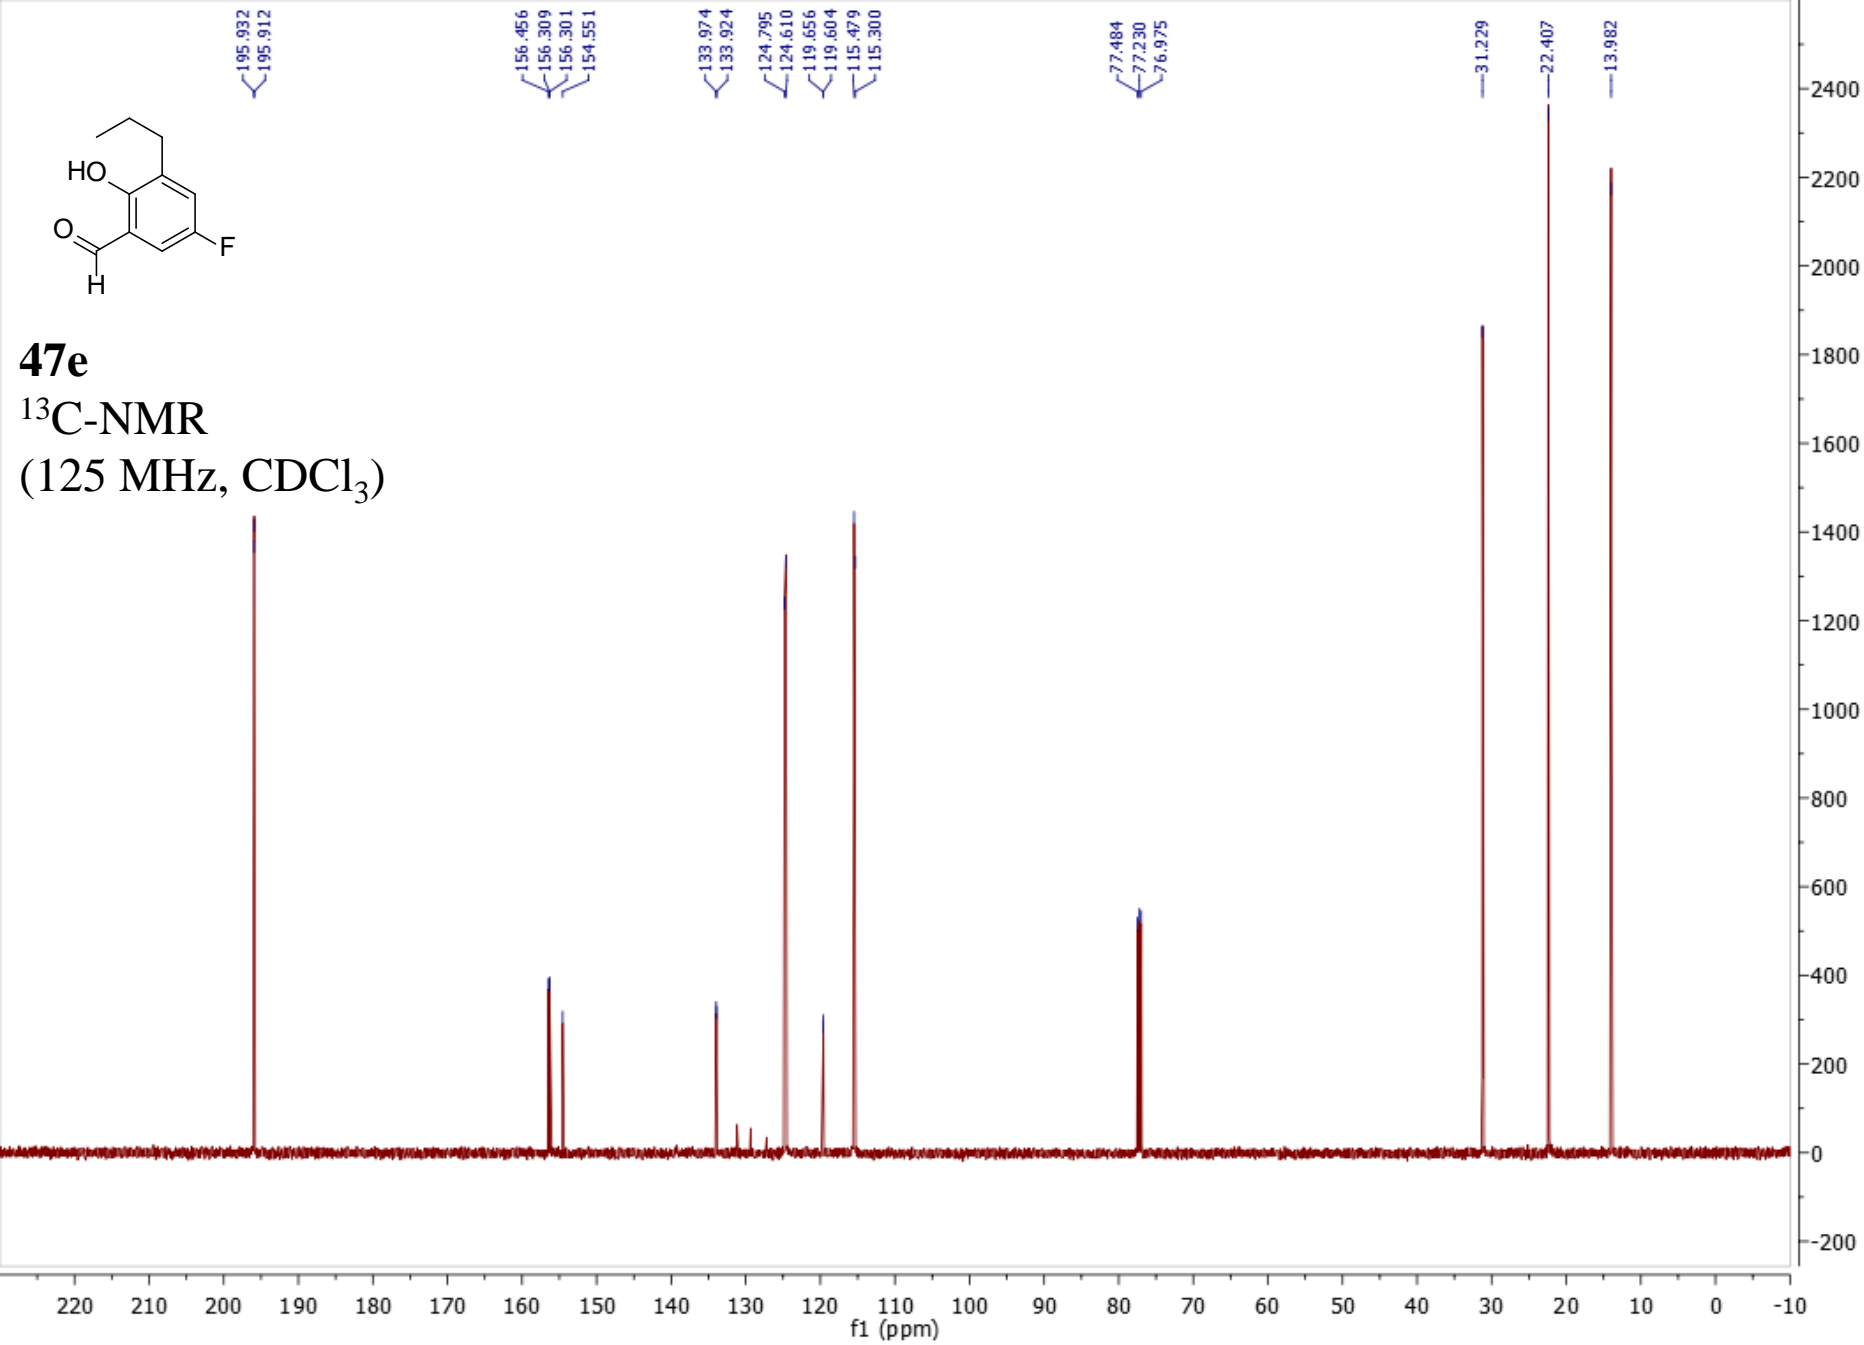

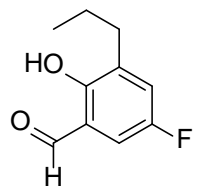

**47e**  
<sup>19</sup>F-NMR  
(470 MHz, CDCl<sub>3</sub>)

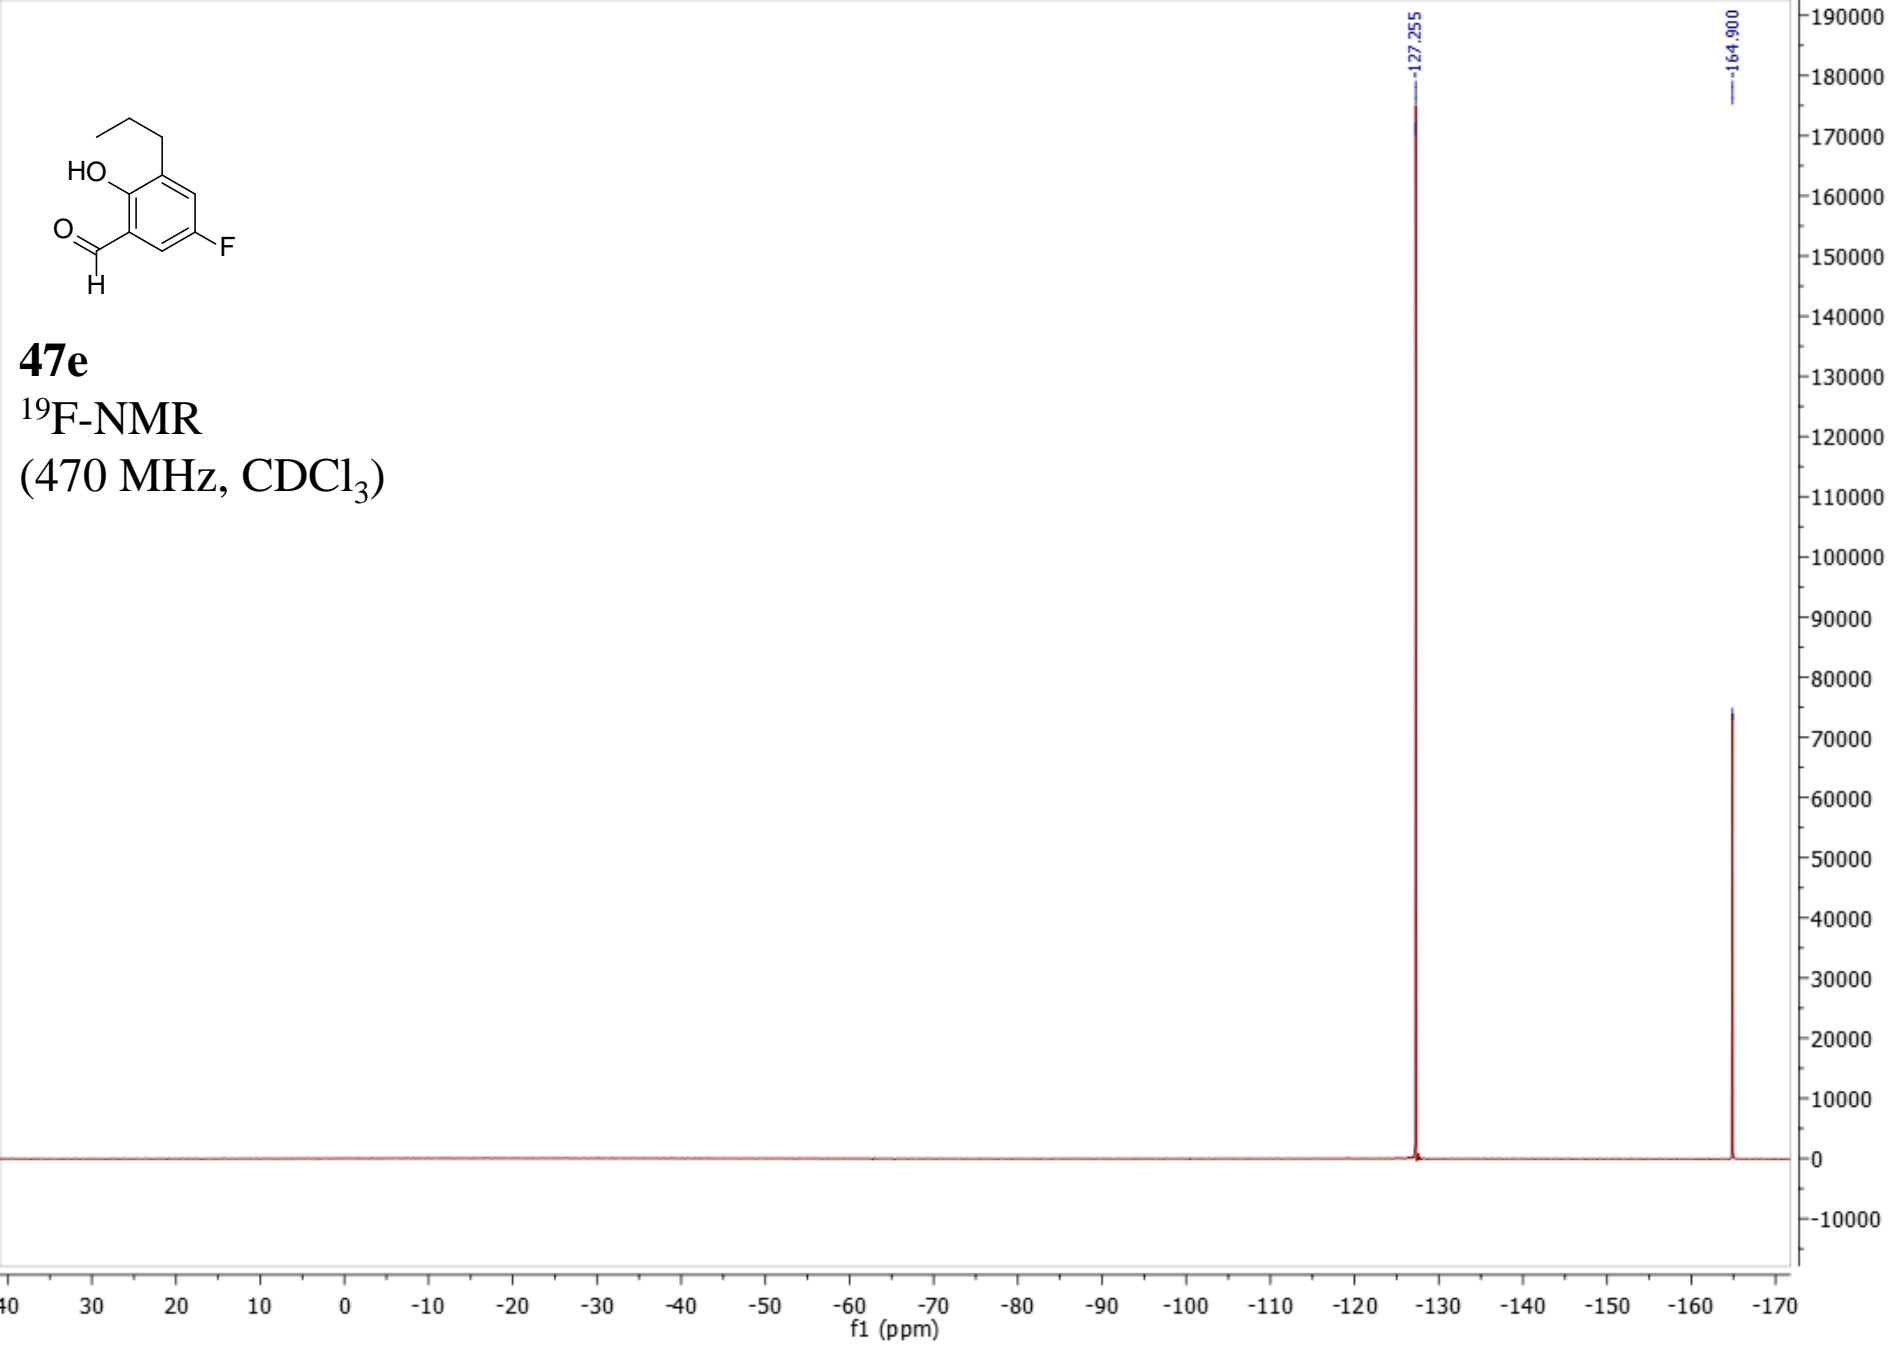

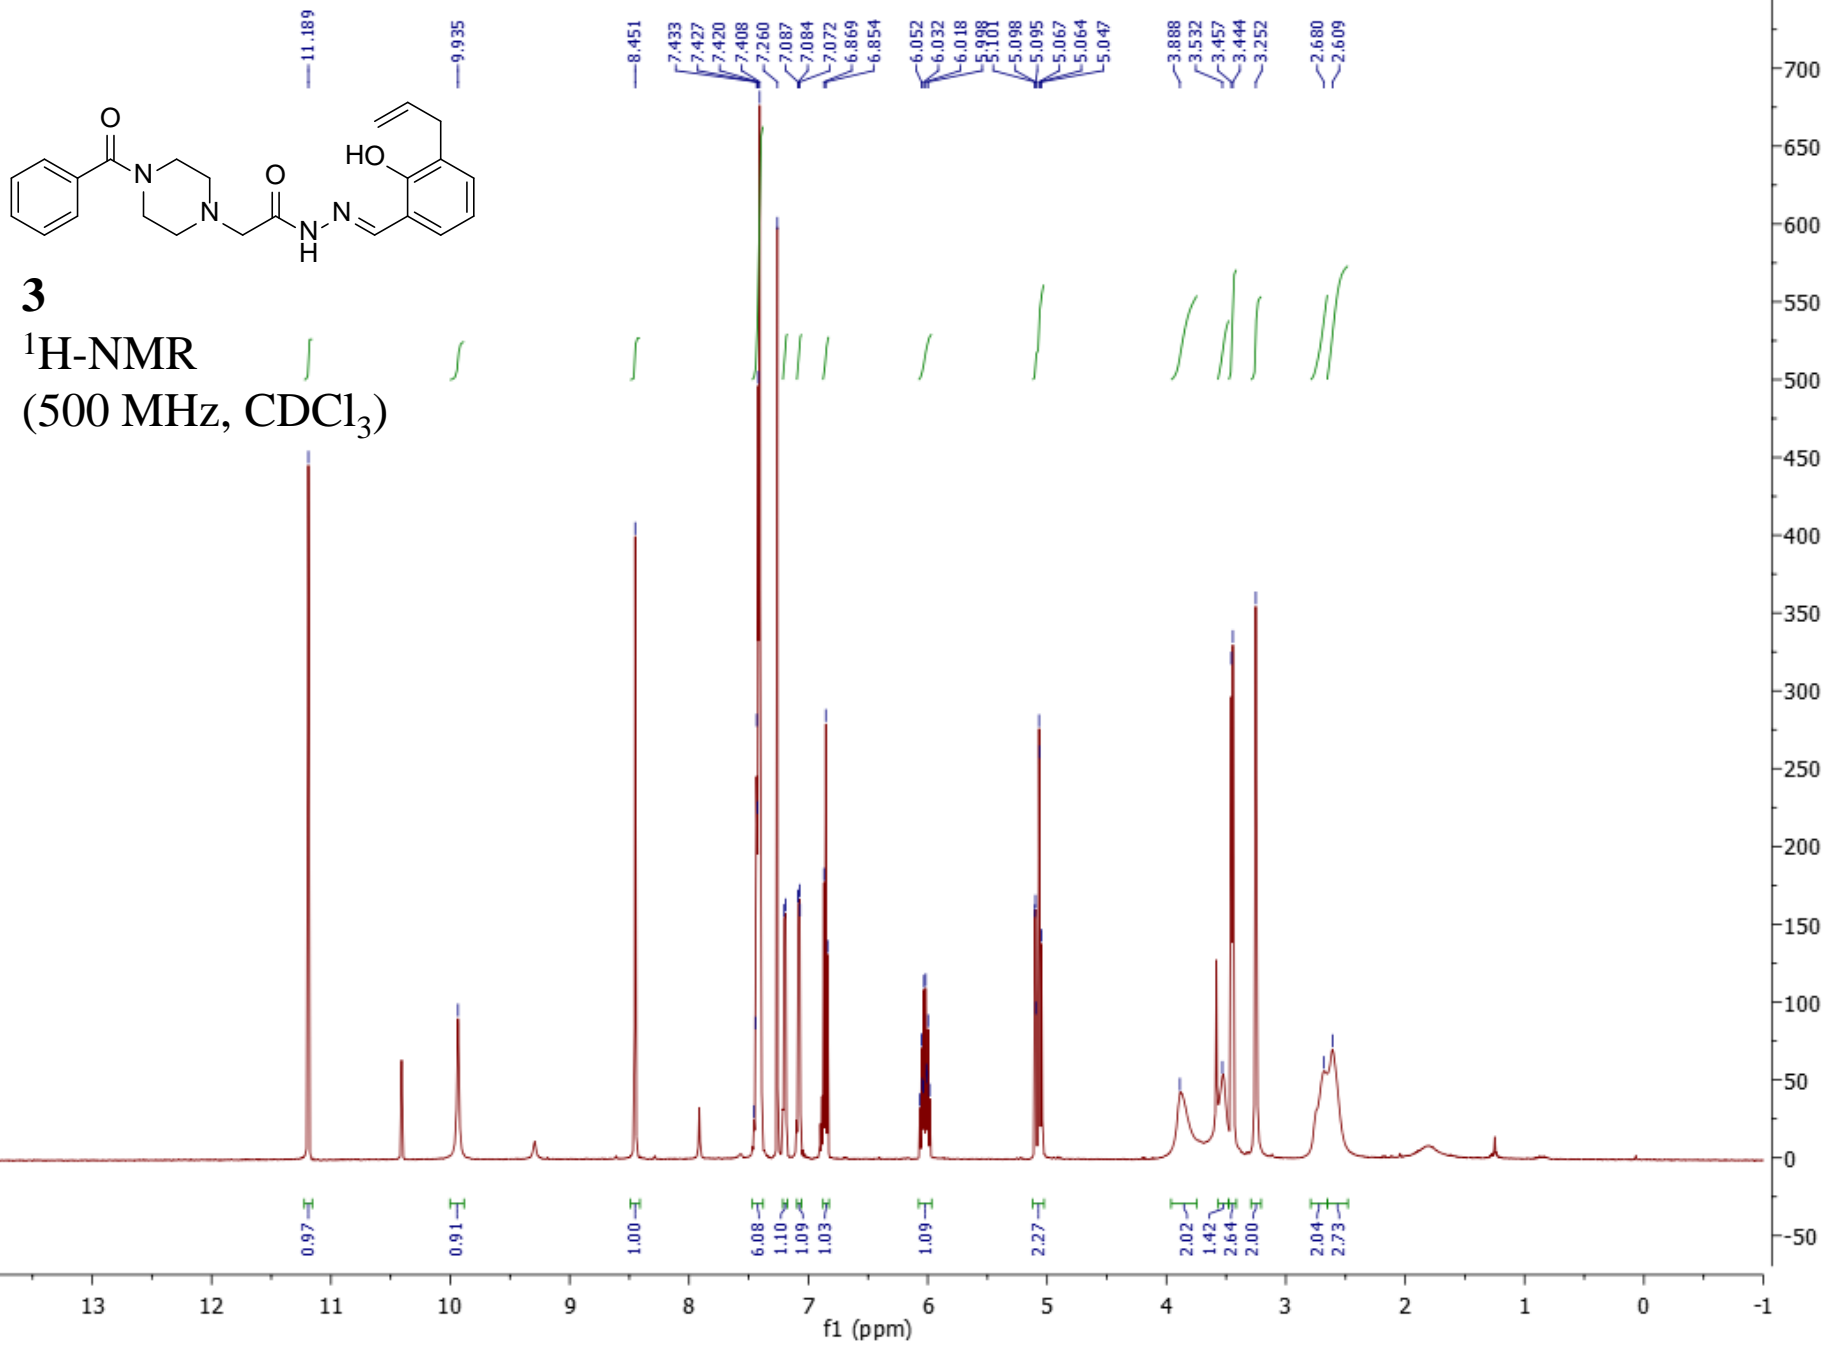

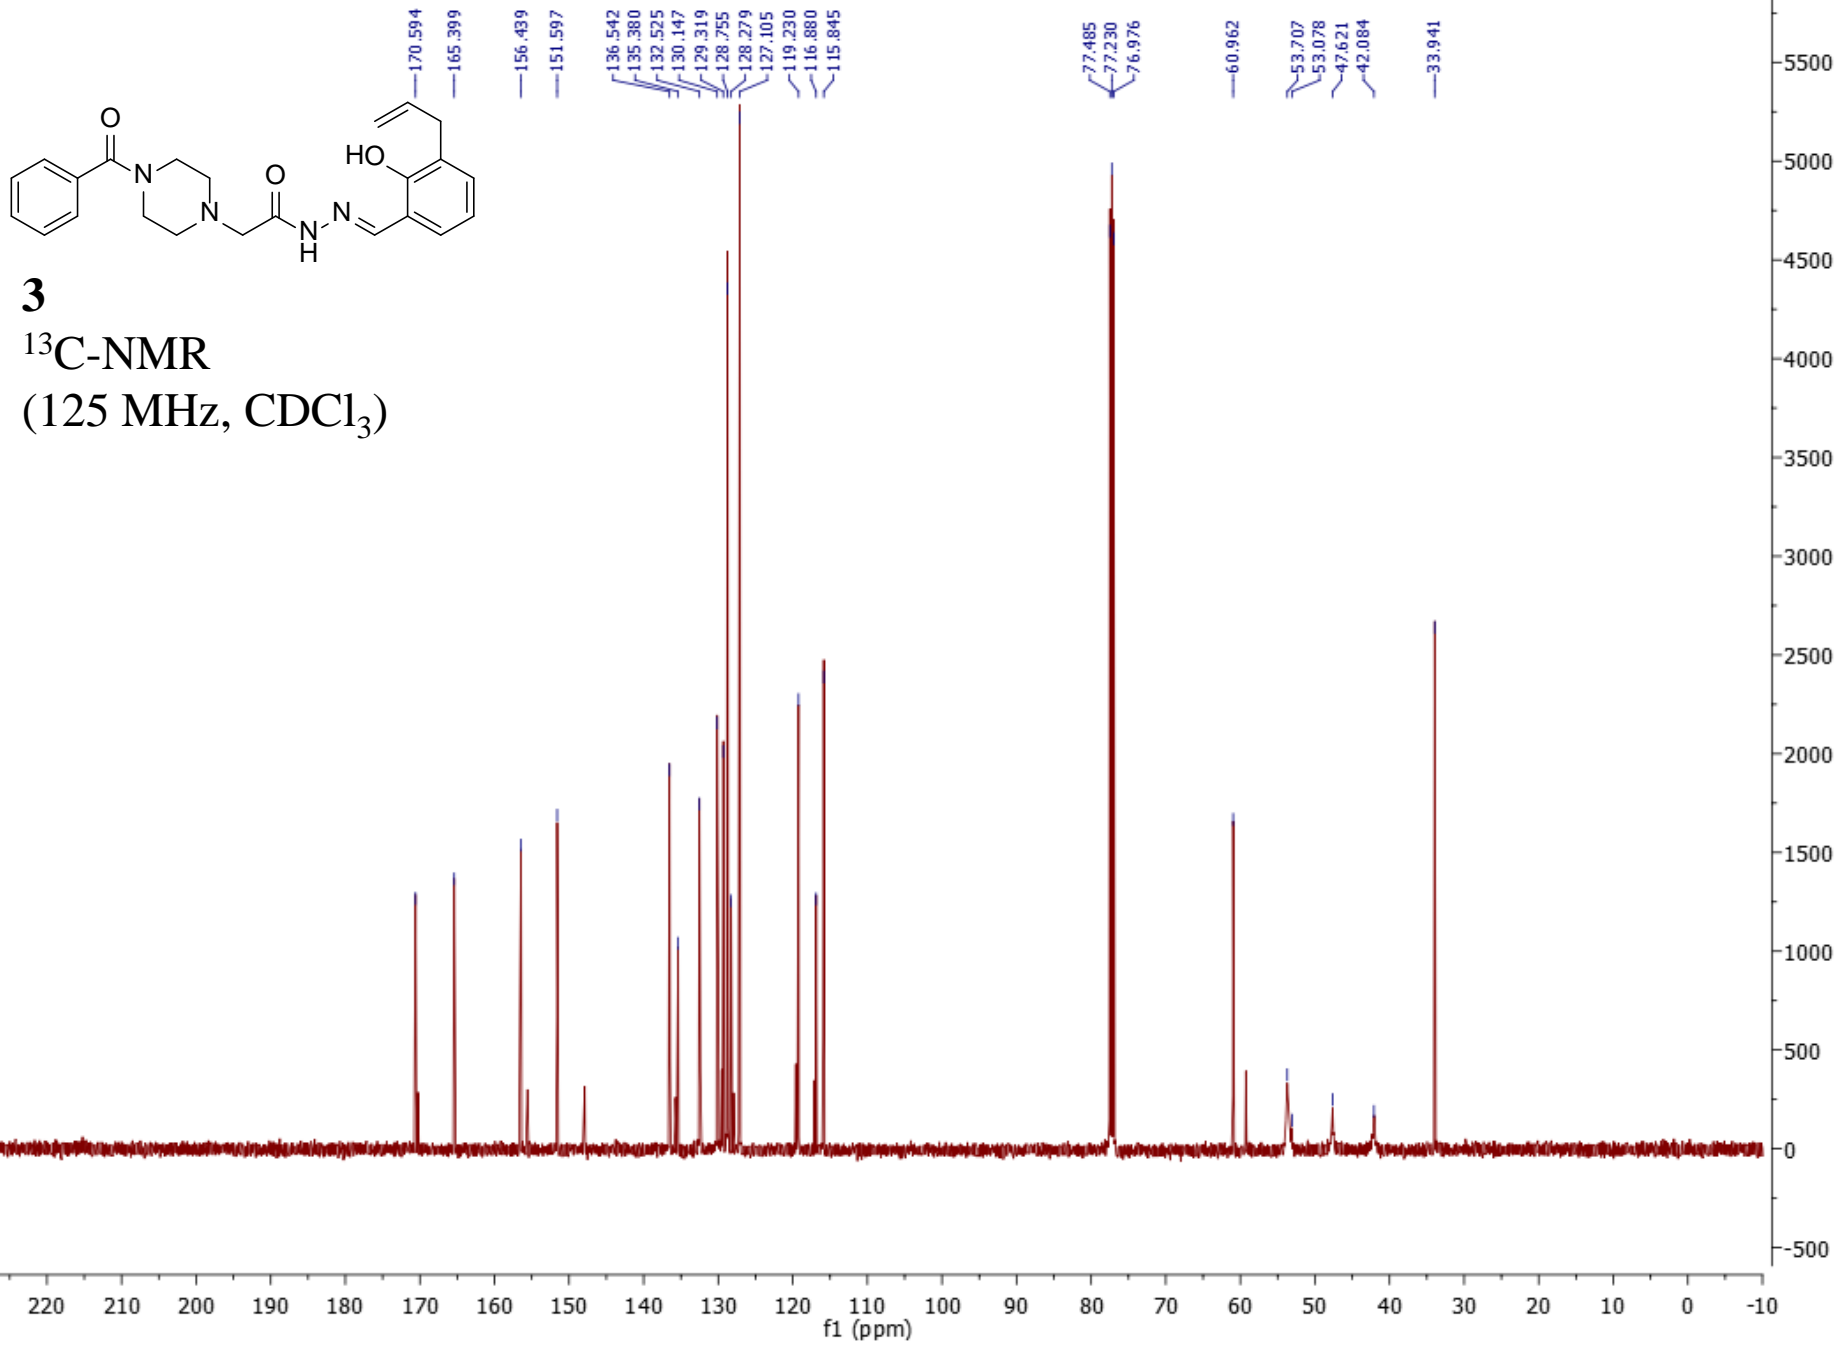



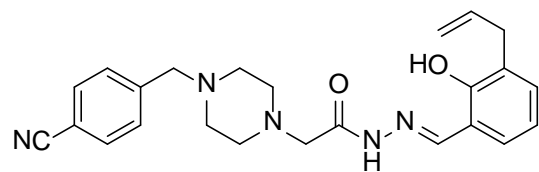

**4**  
 $^1\text{H-NMR}$   
 (500 MHz,  $\text{CDCl}_3$ )

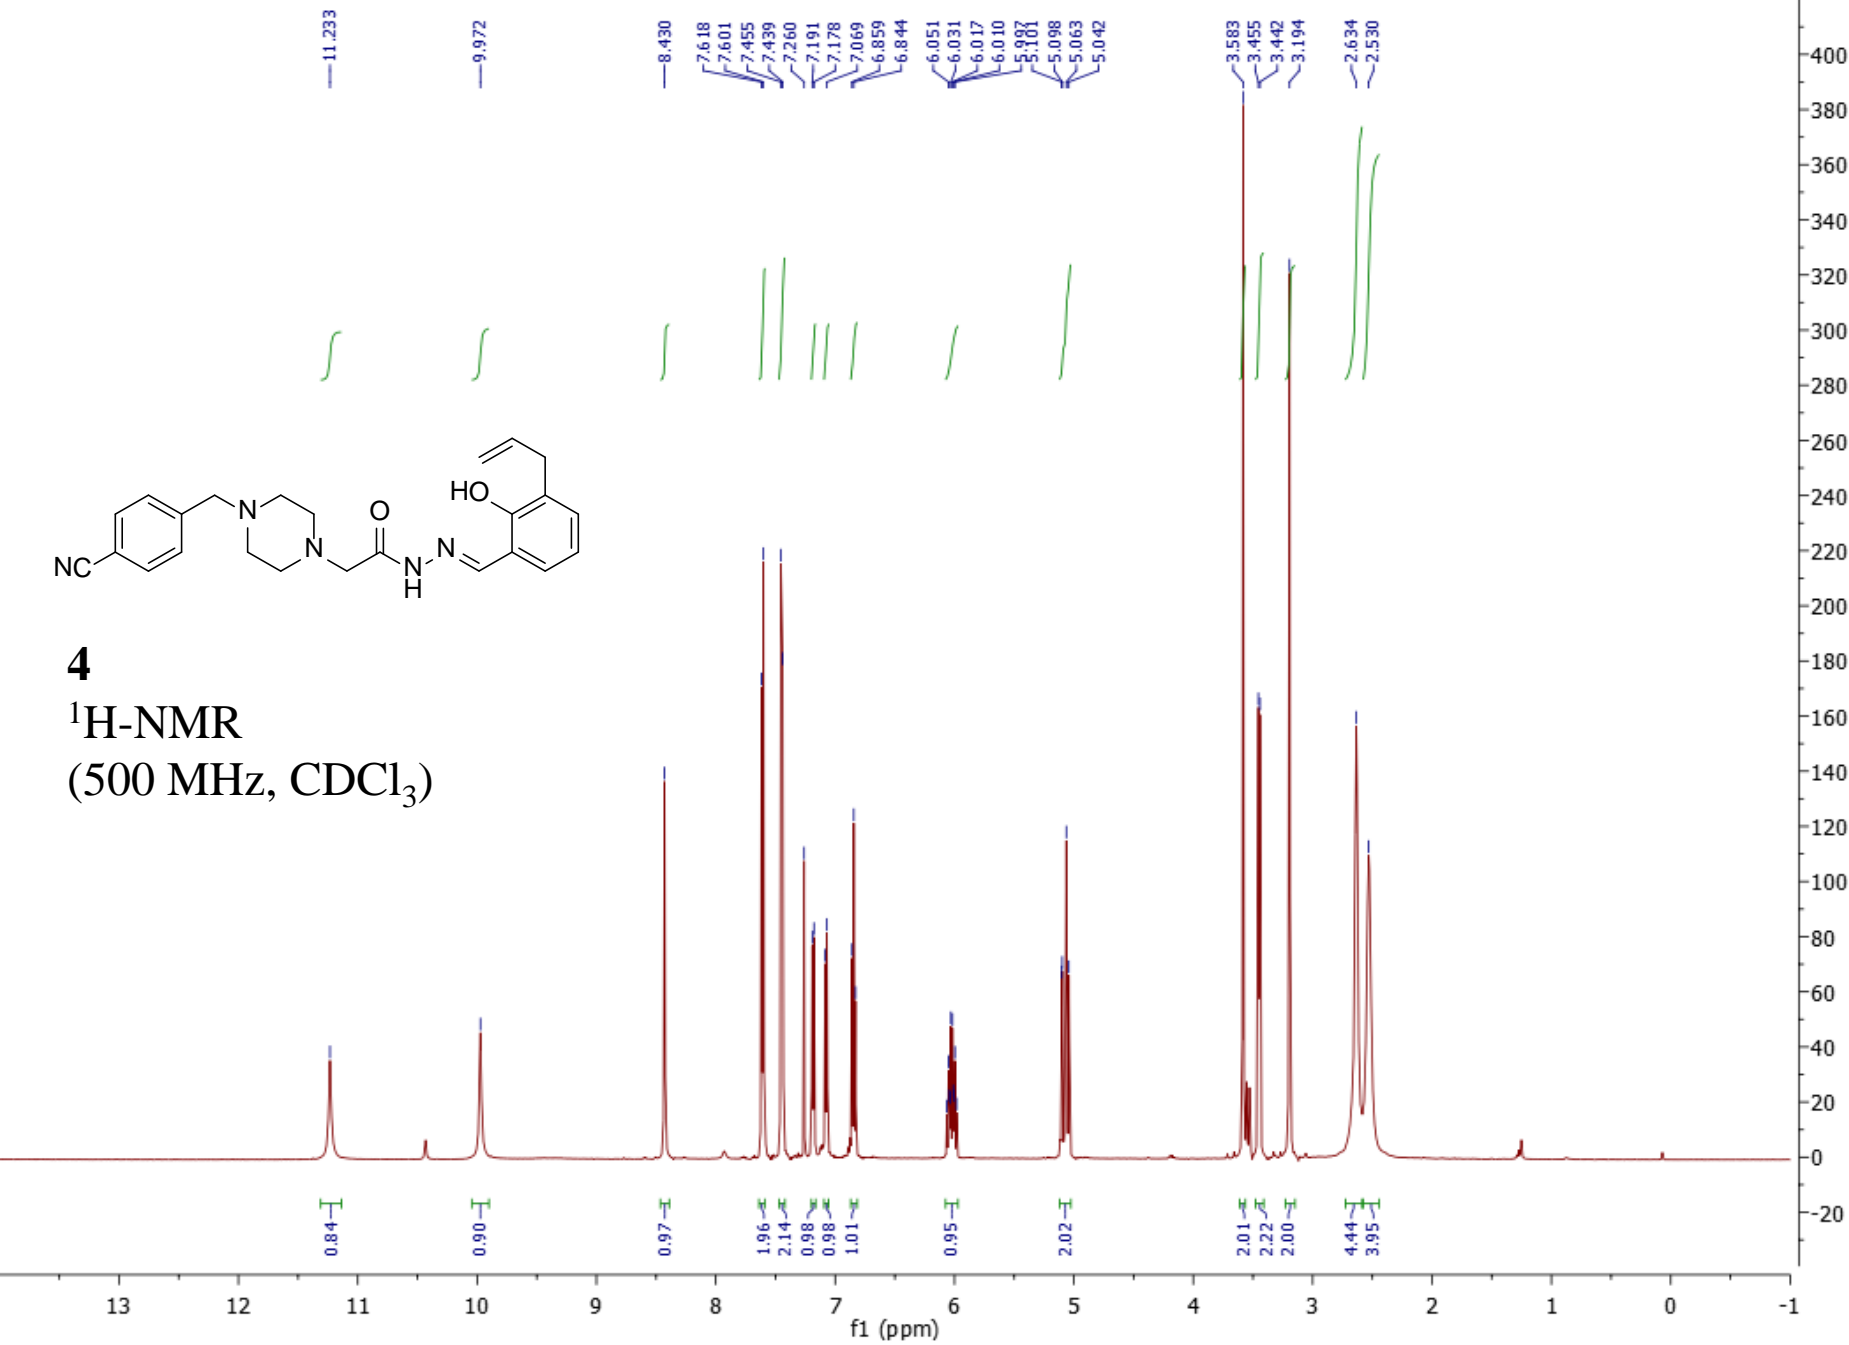

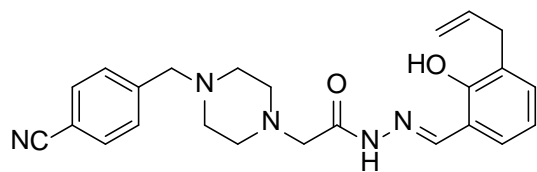

**4**  
 $^{13}\text{C}$ -NMR  
(125 MHz,  $\text{CDCl}_3$ )

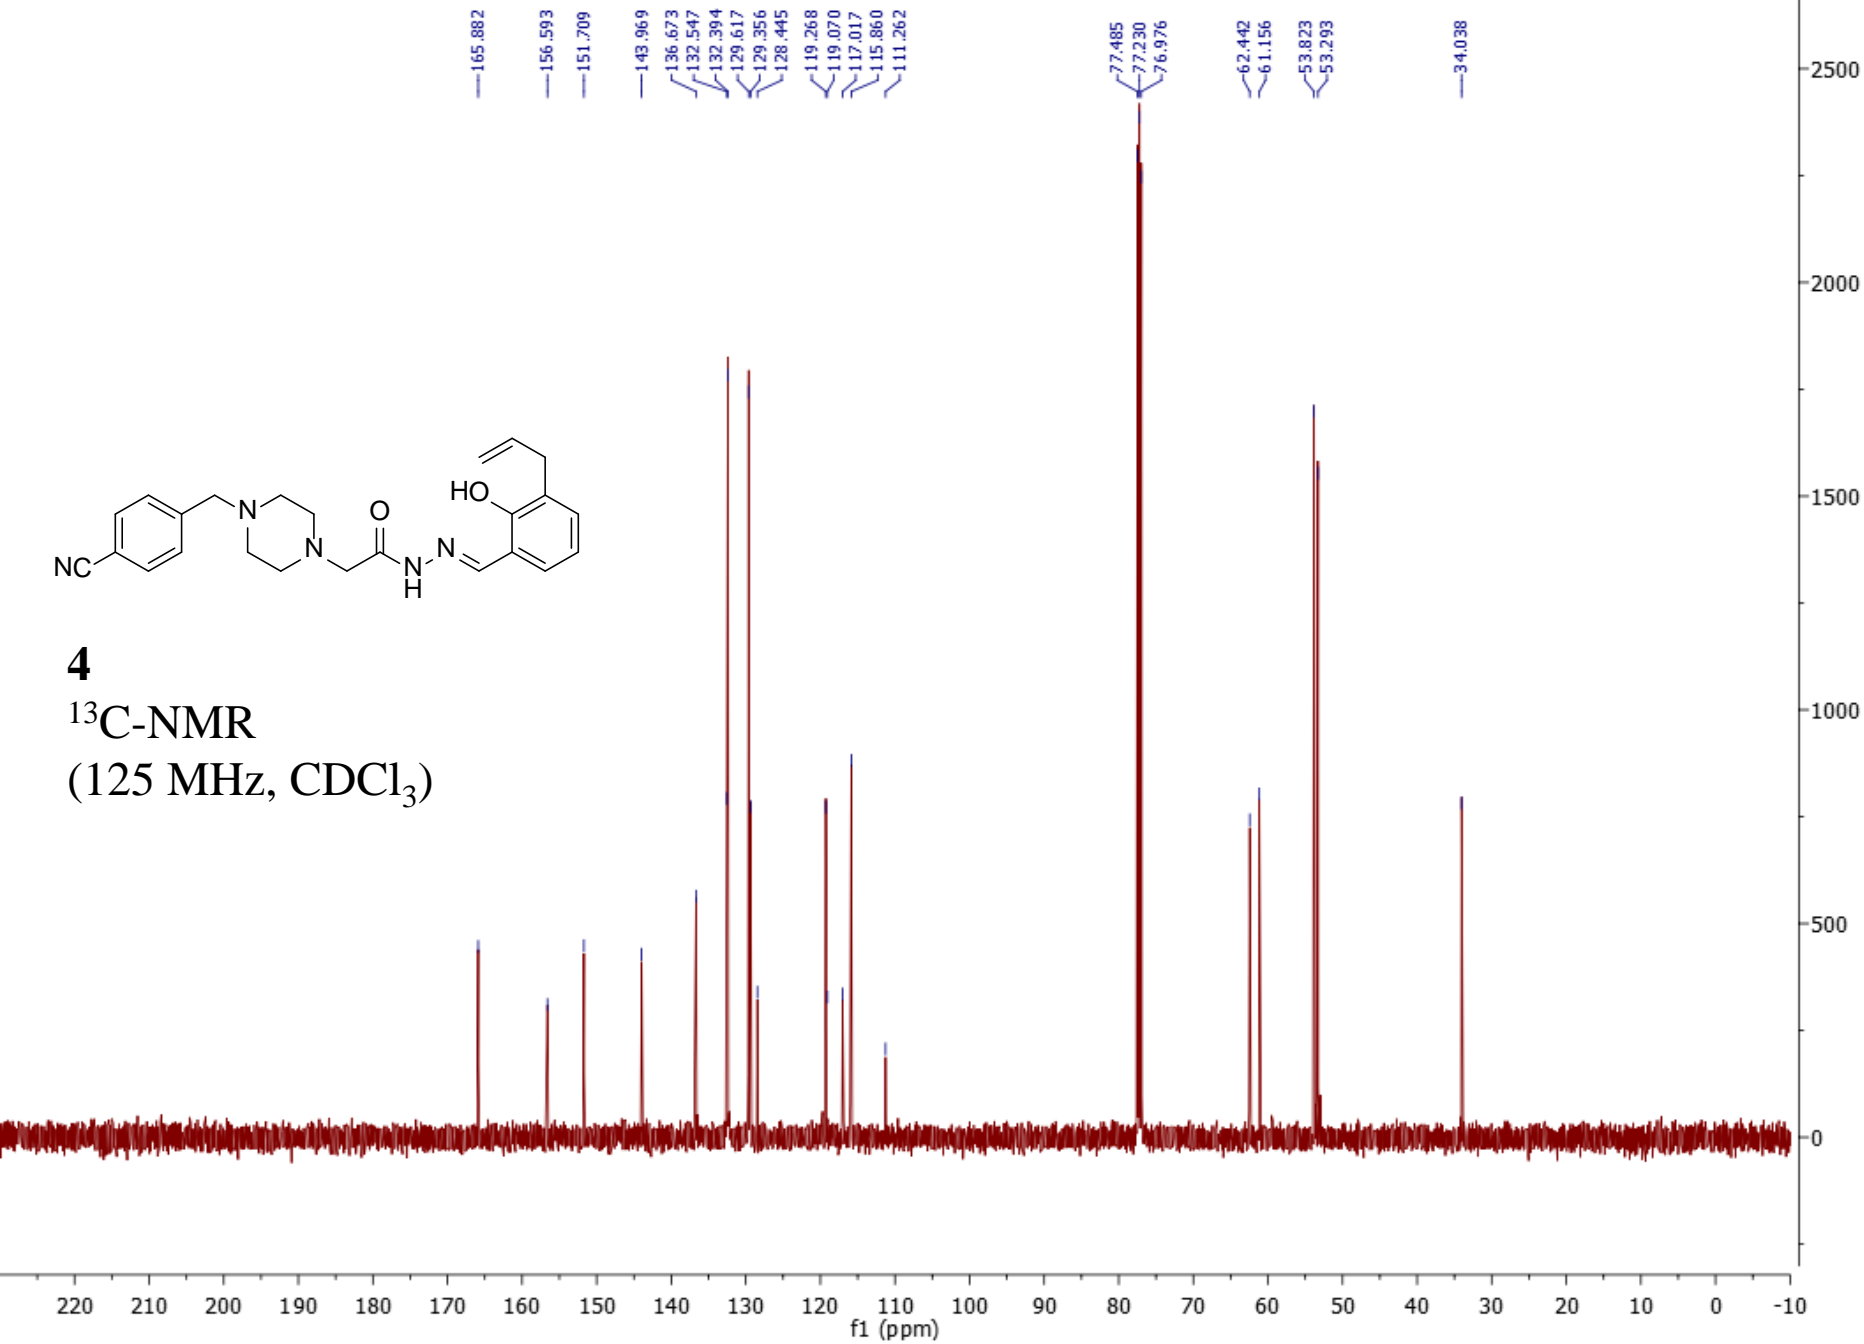

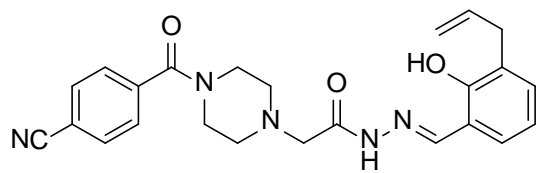

**5**  
 $^1\text{H-NMR}$   
 (500 MHz,  $\text{CDCl}_3$ )

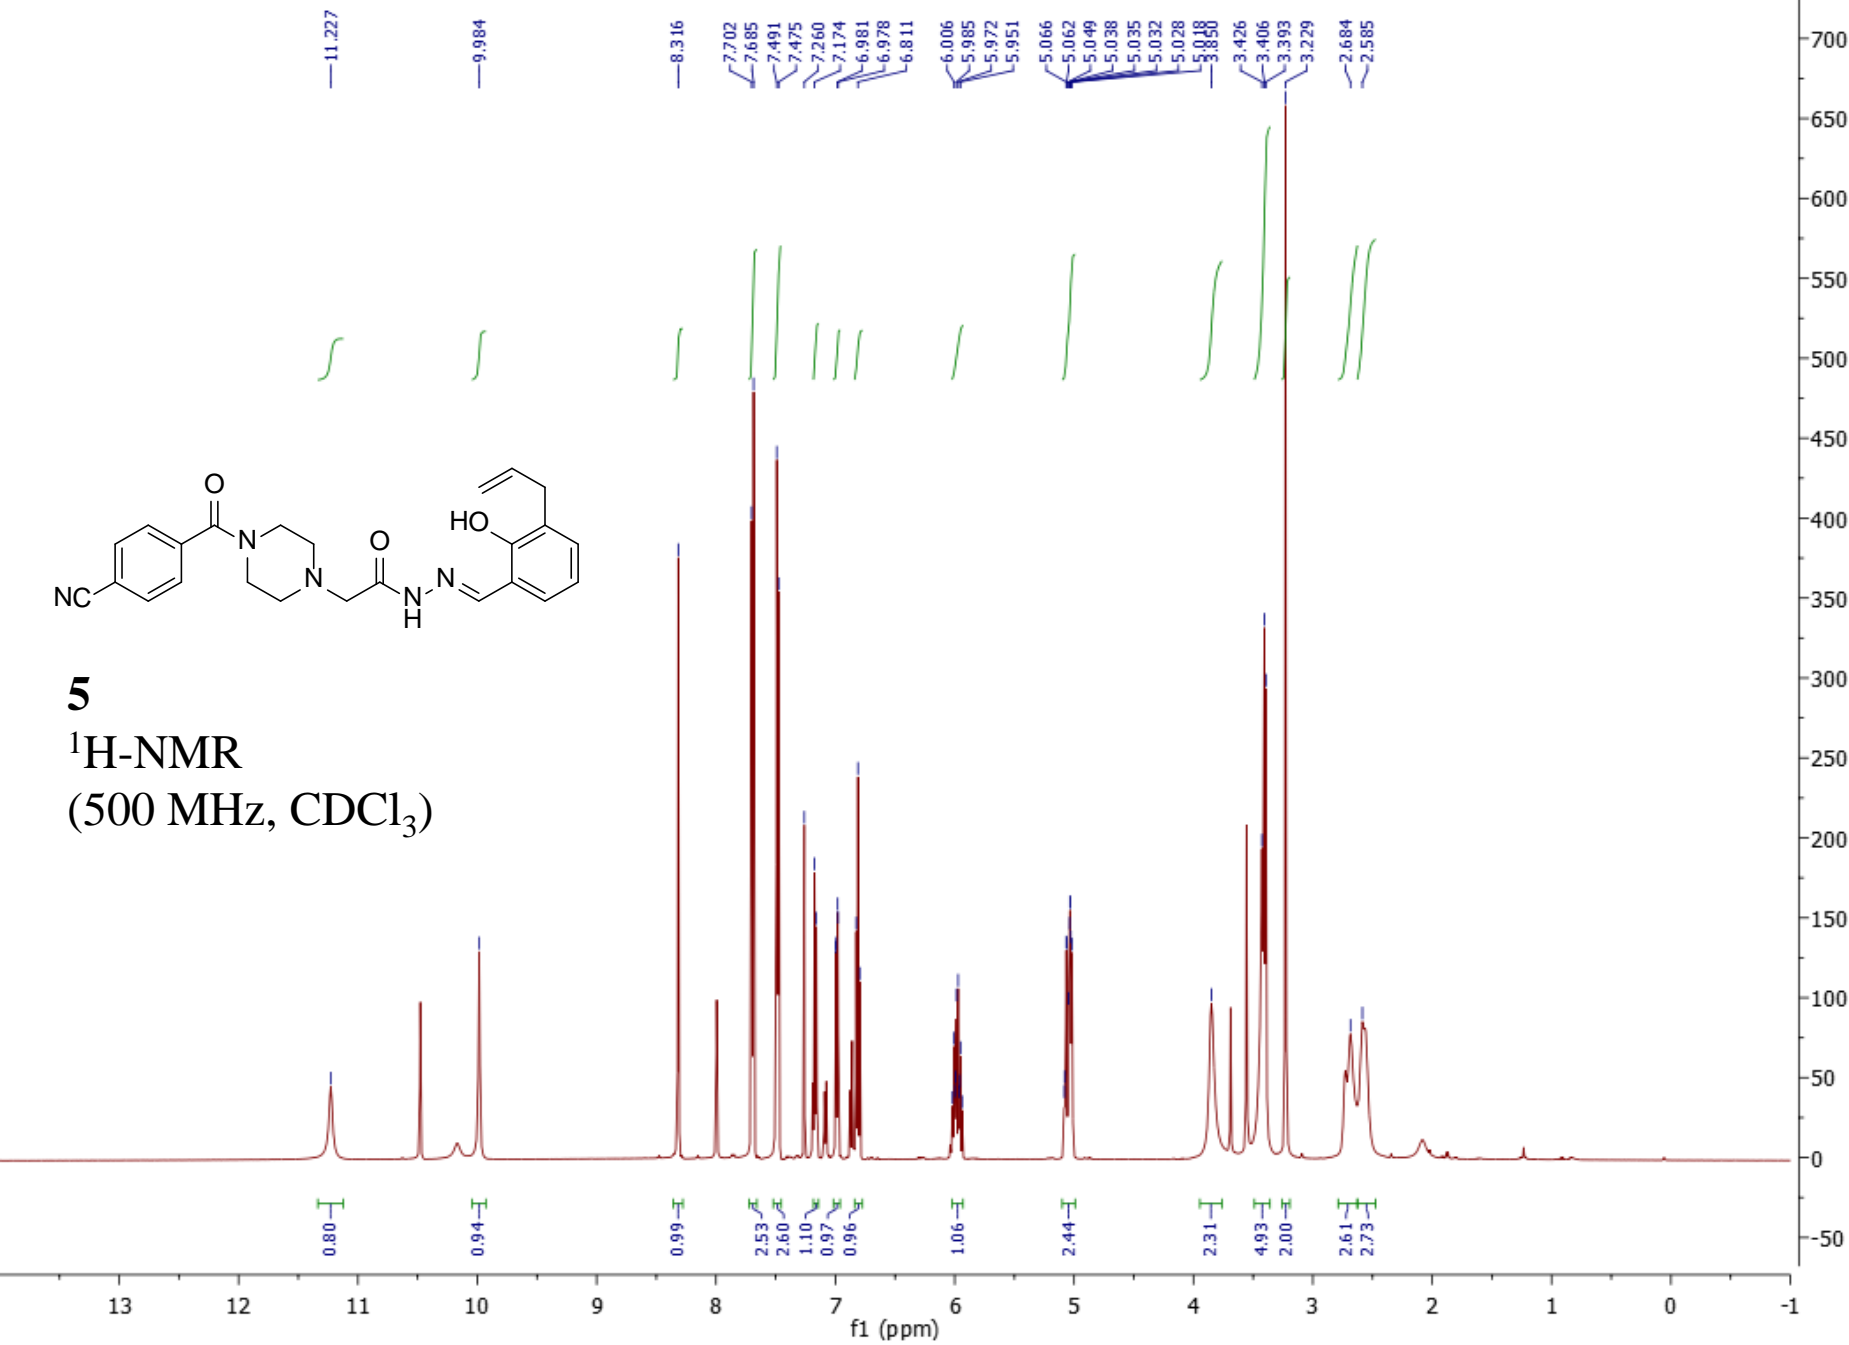

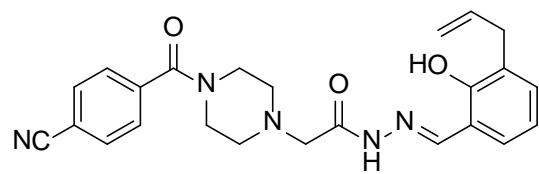

**5**  
 $^{13}\text{C}$ -NMR  
(125 MHz,  $\text{CDCl}_3$ )

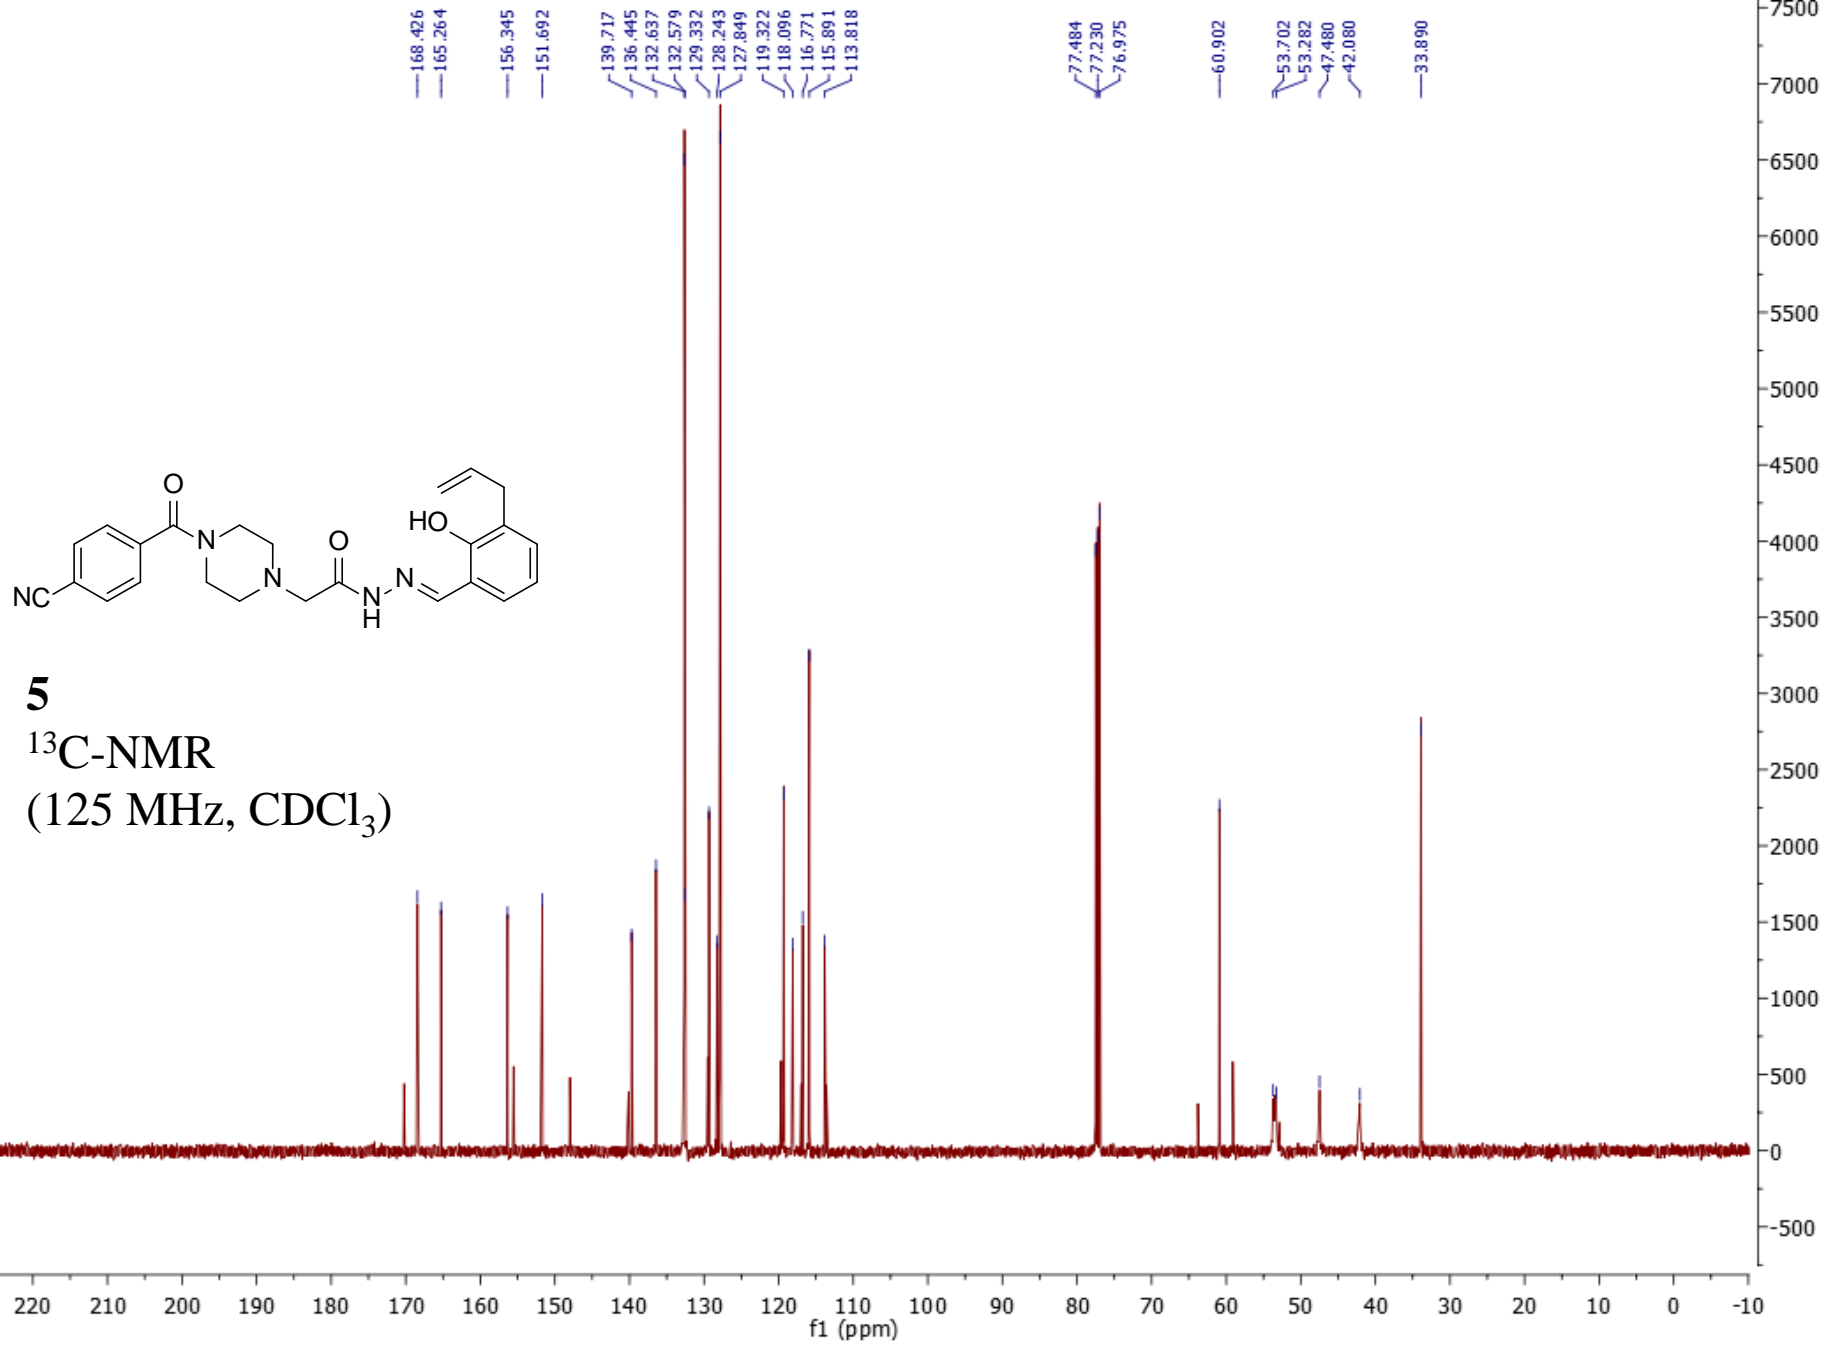

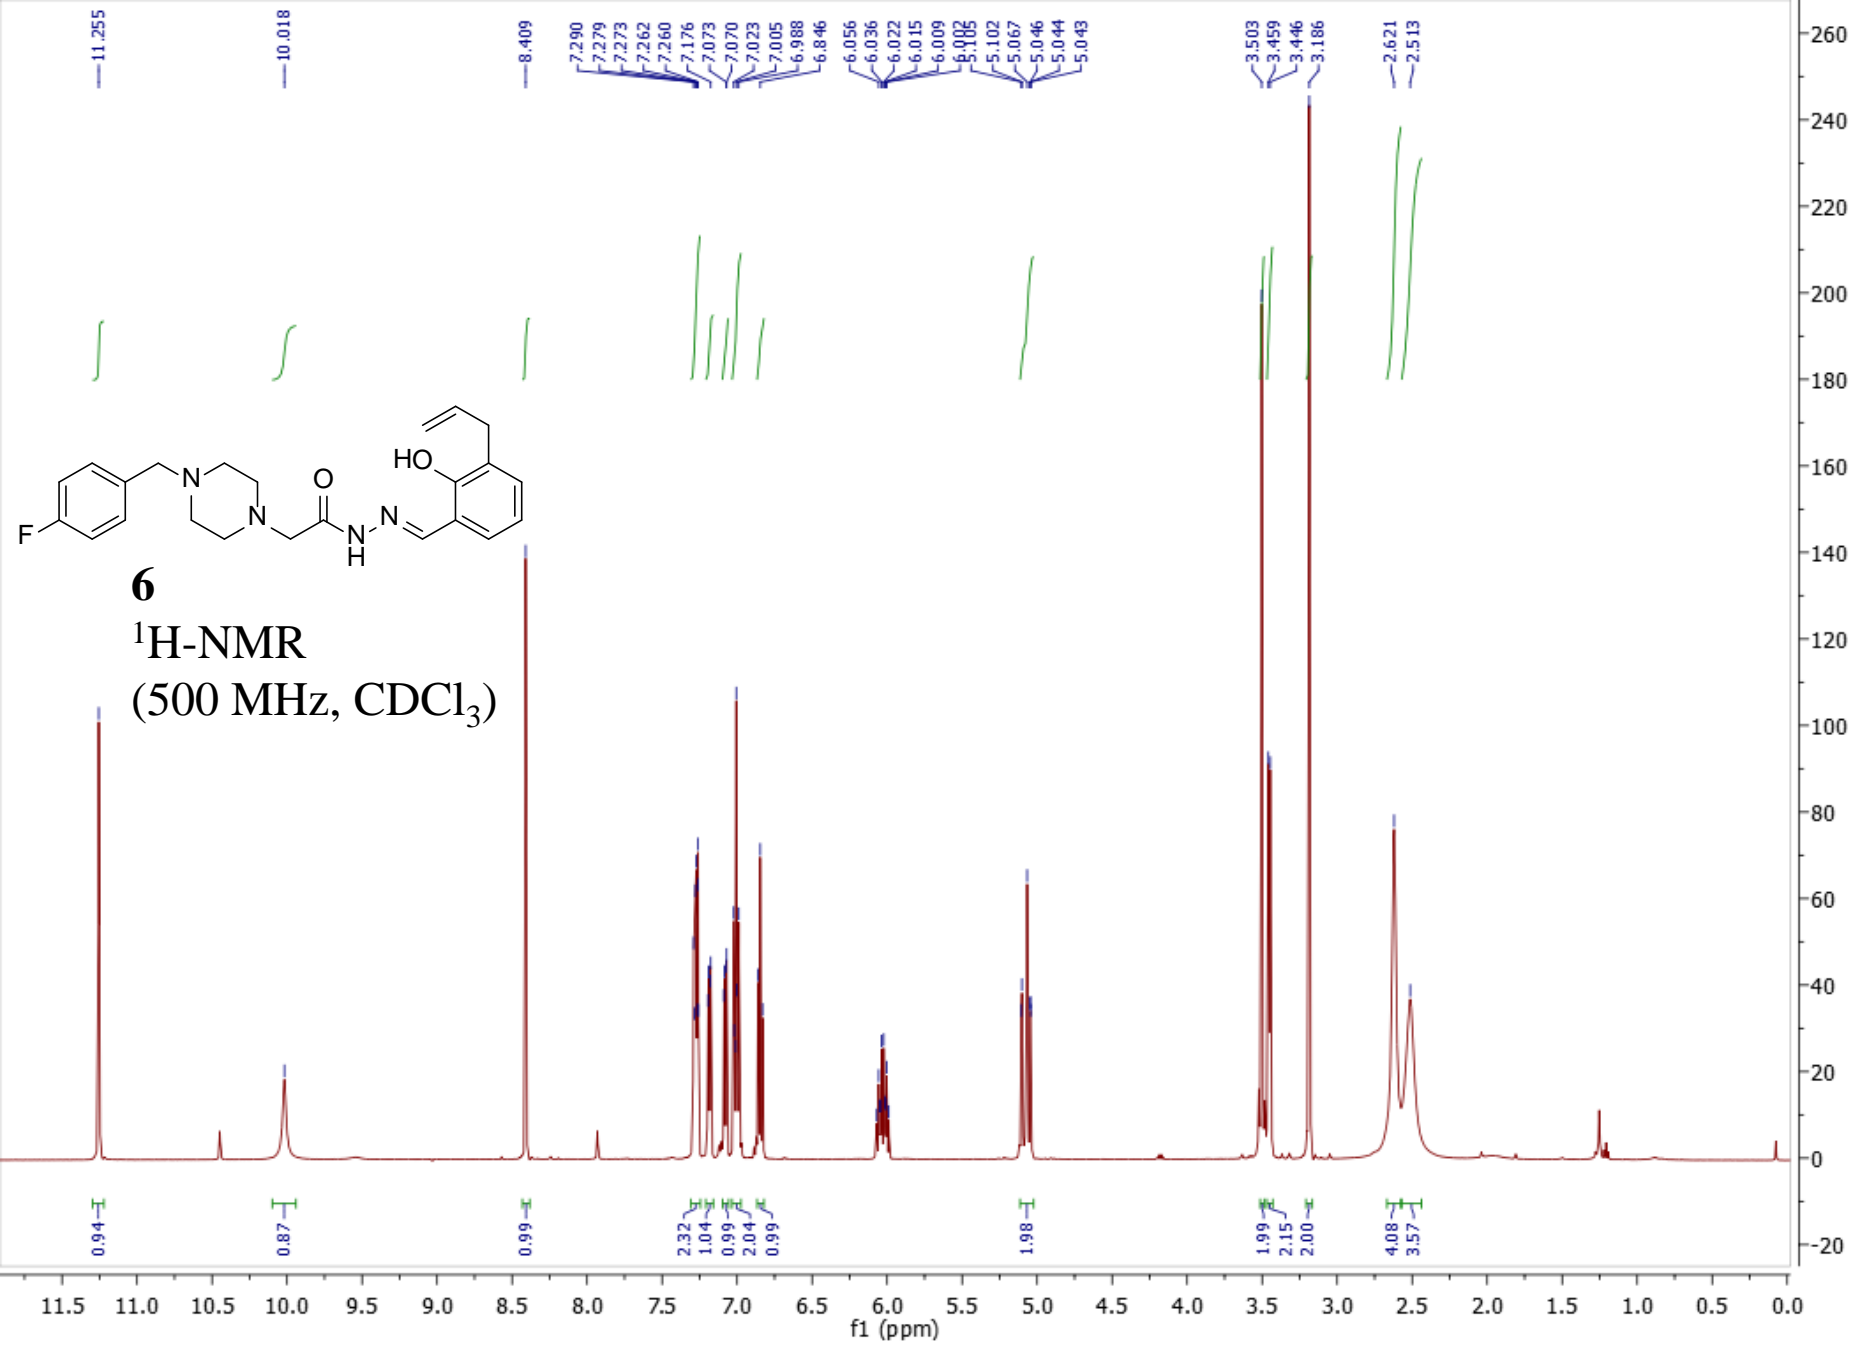

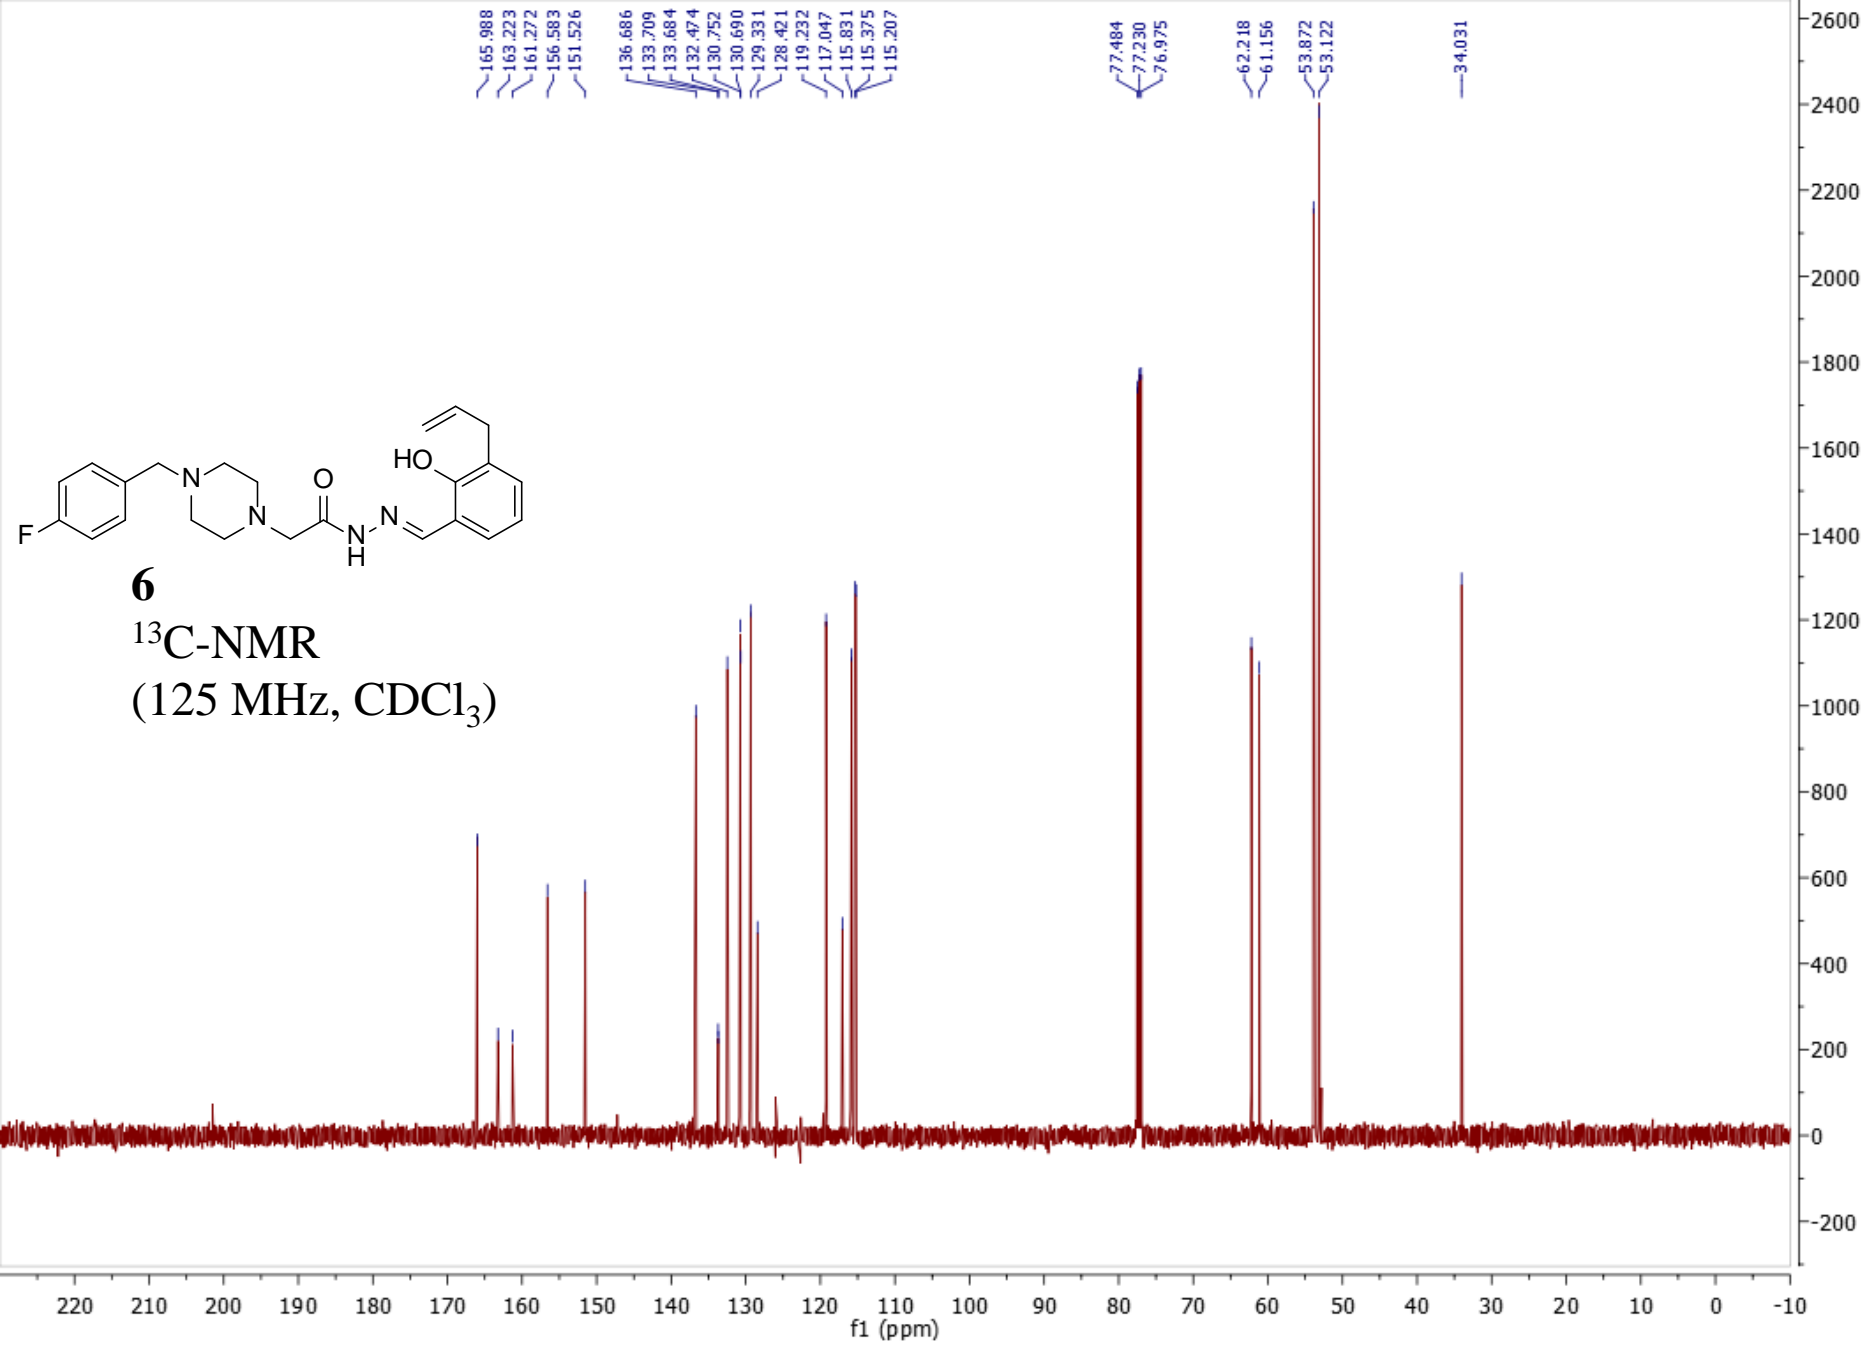

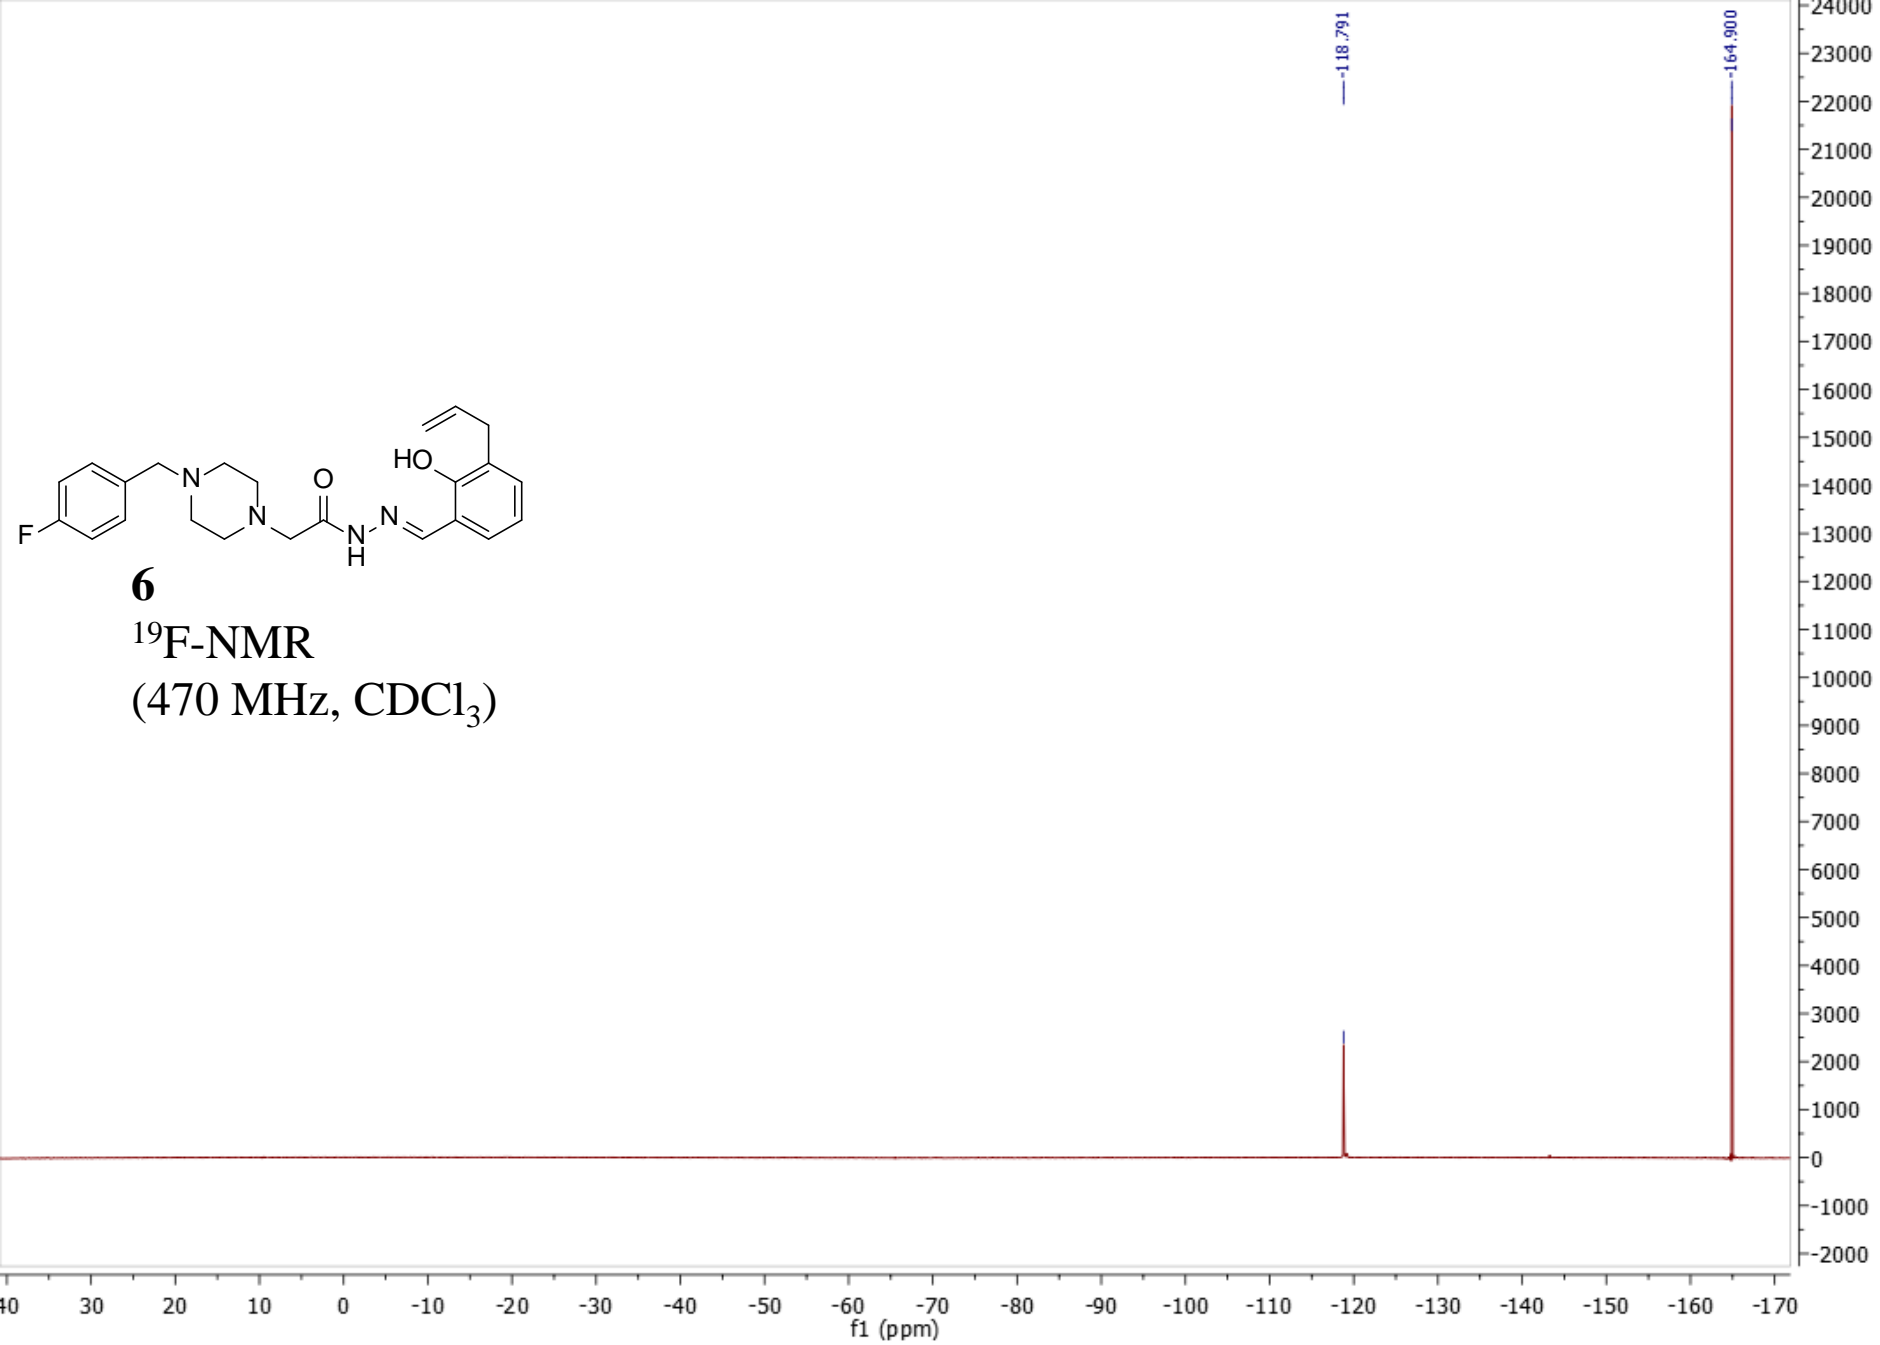

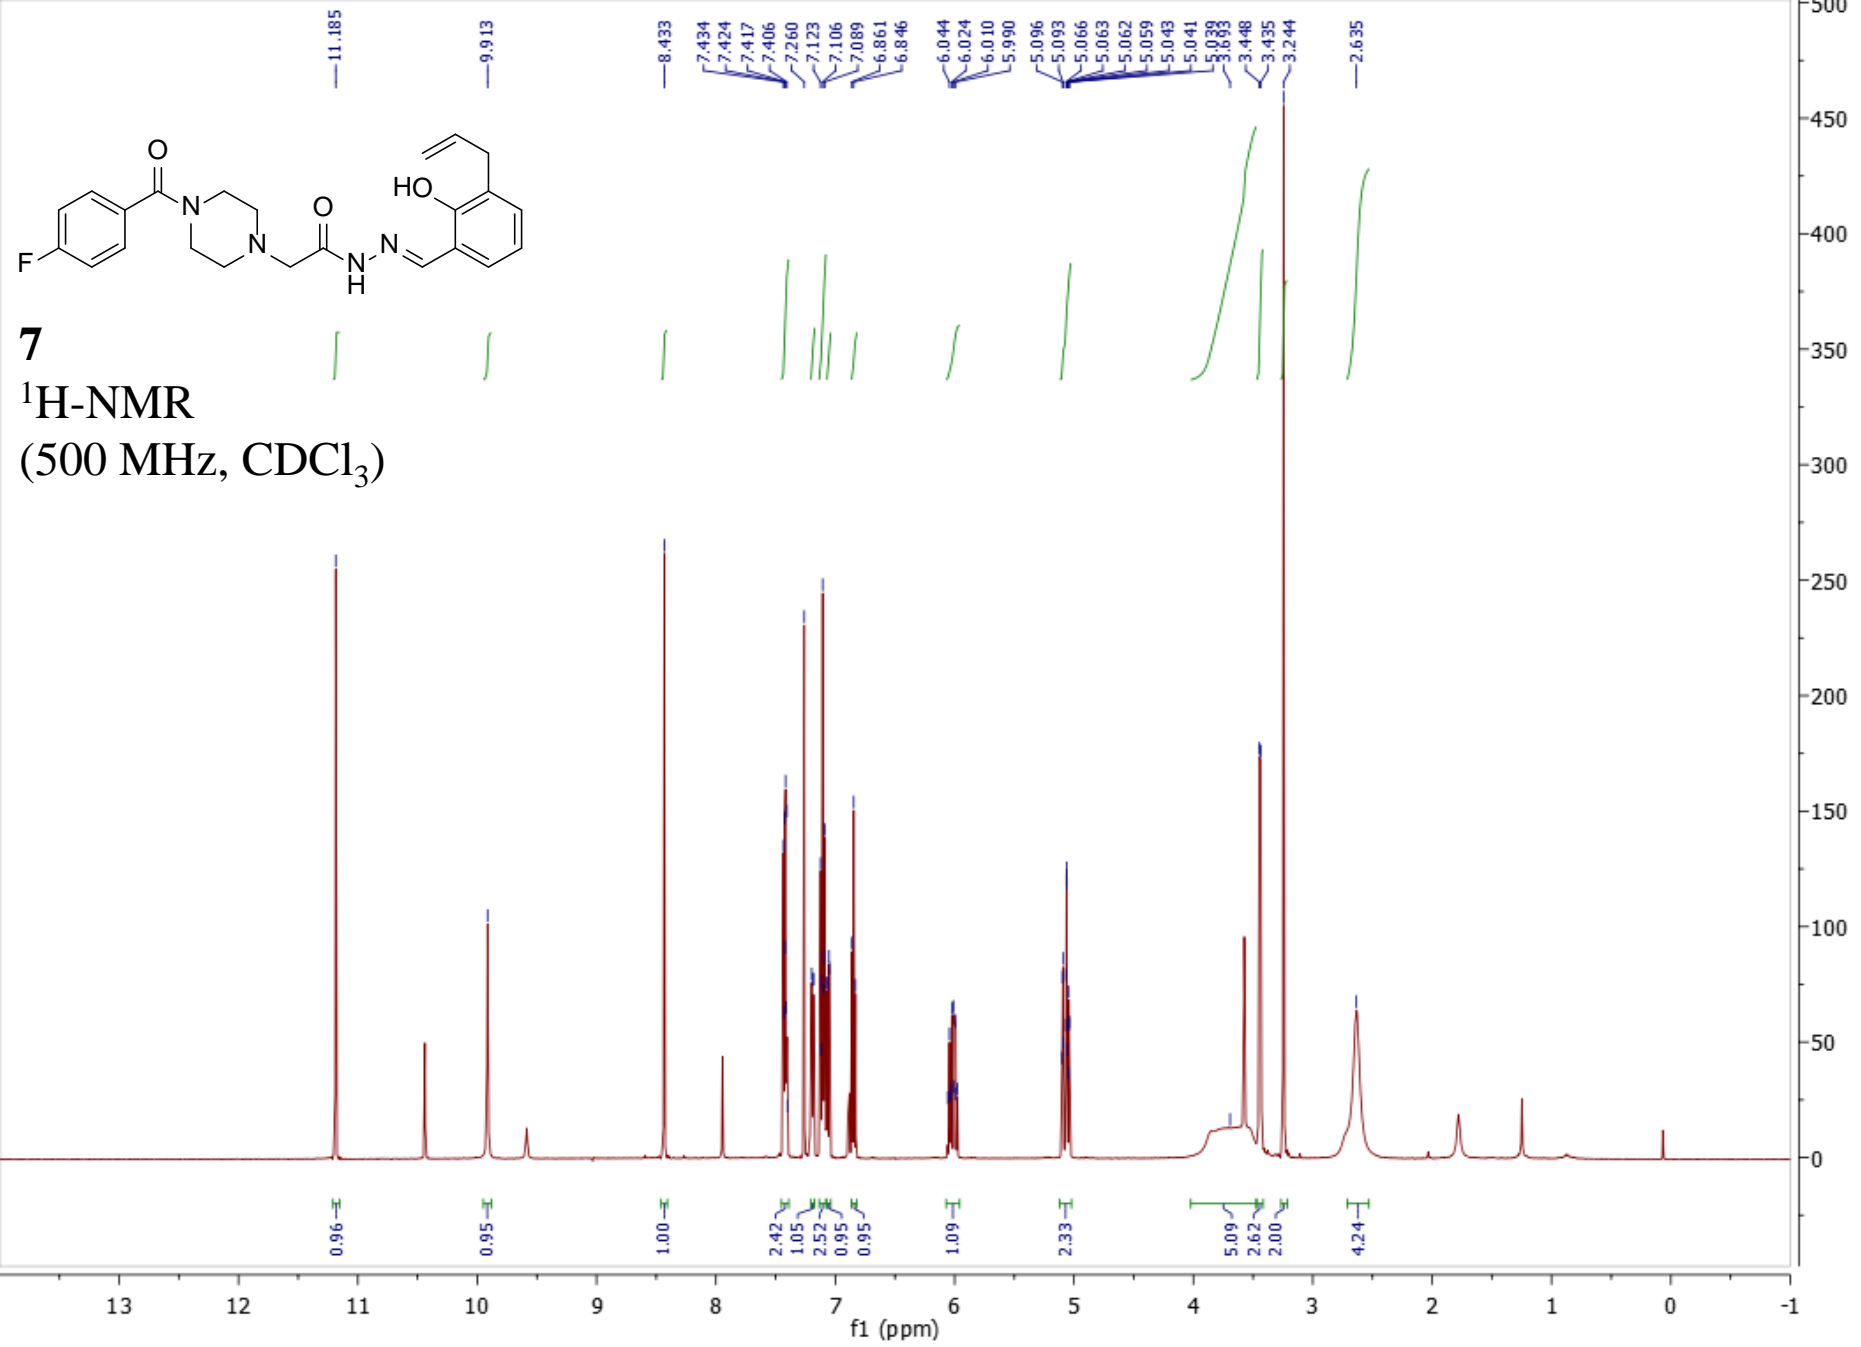



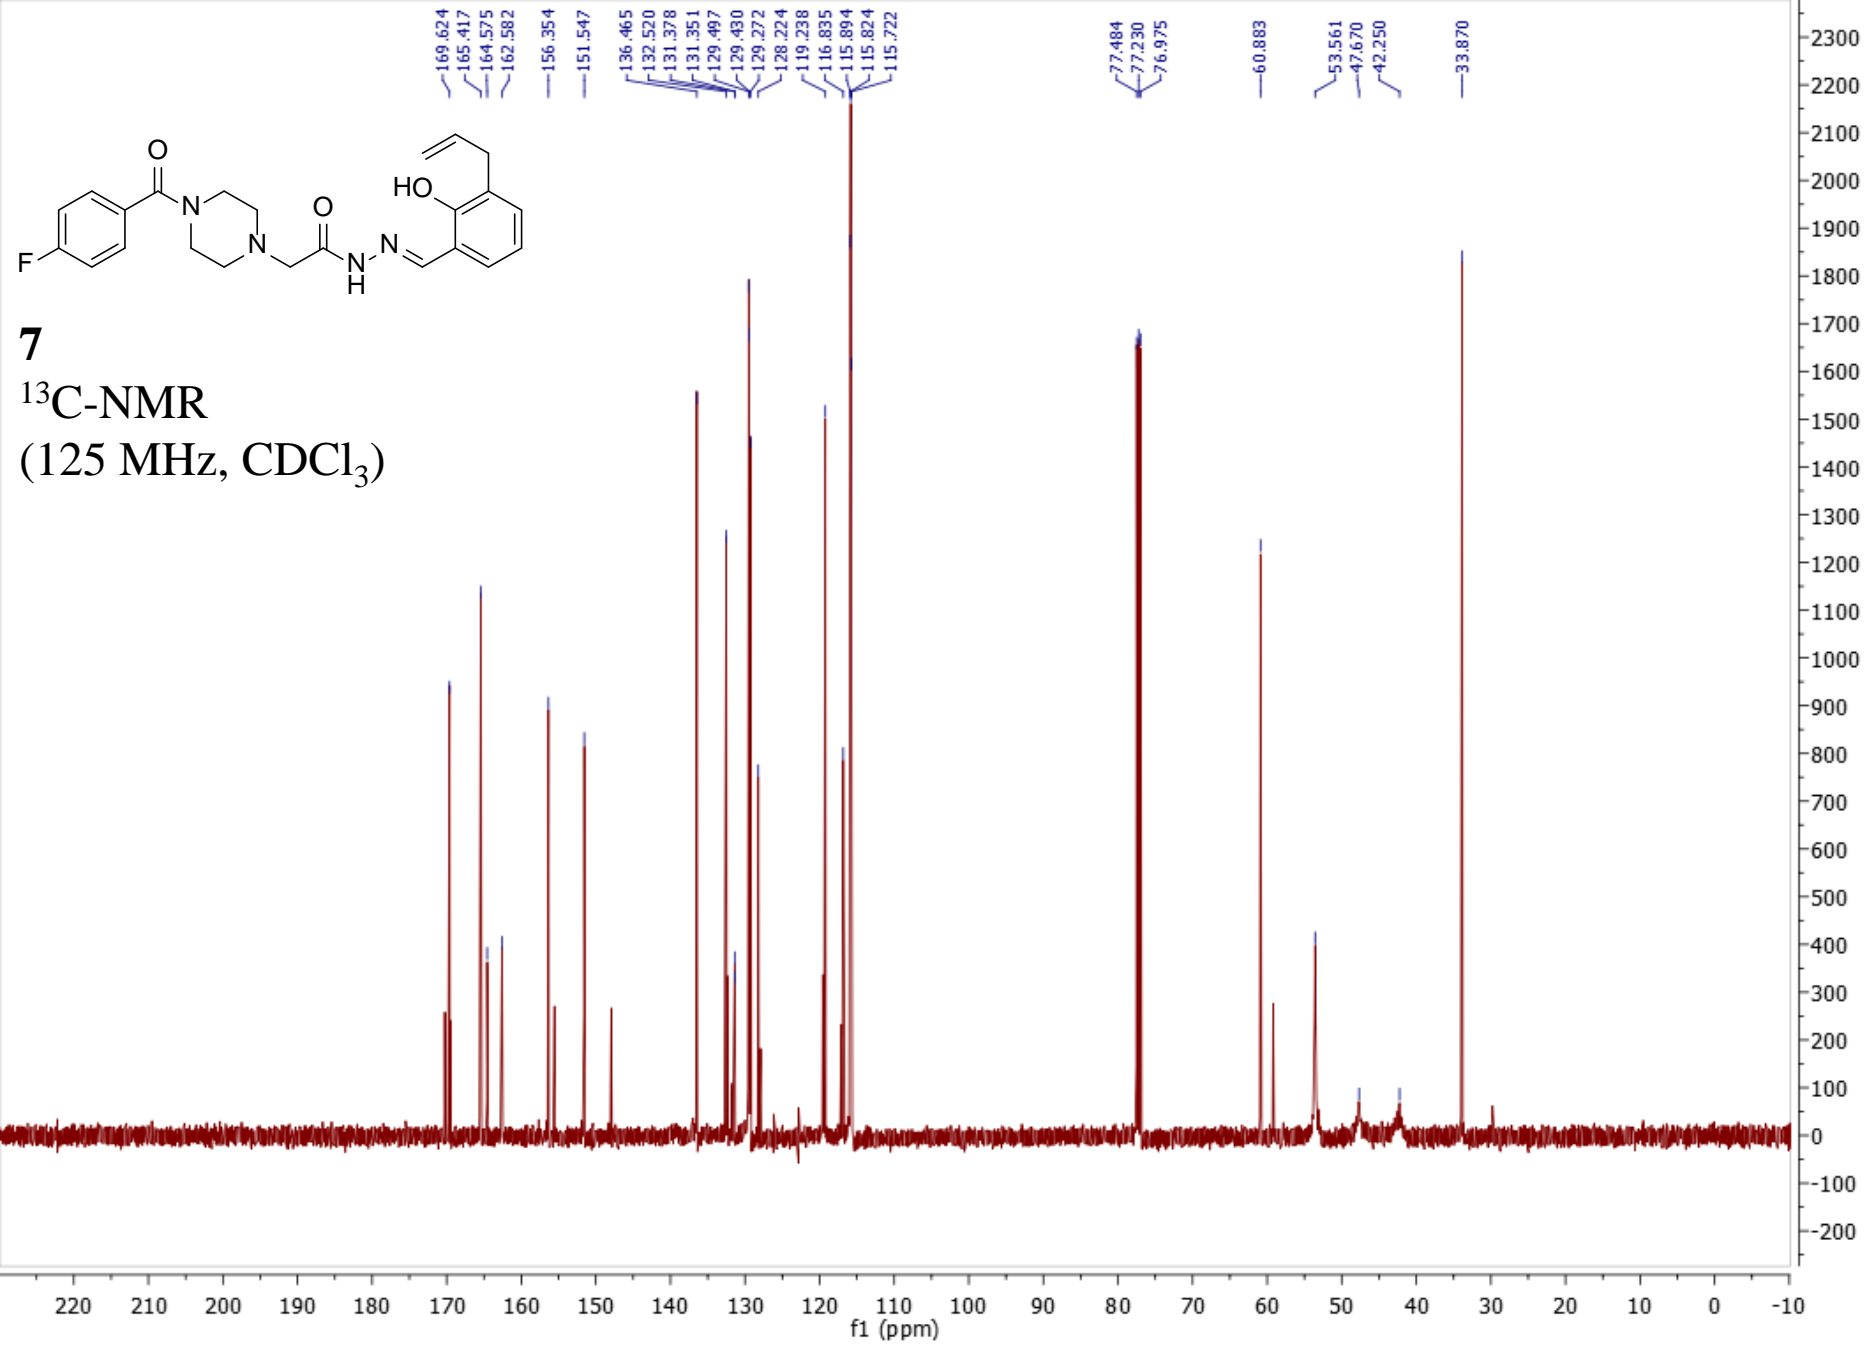

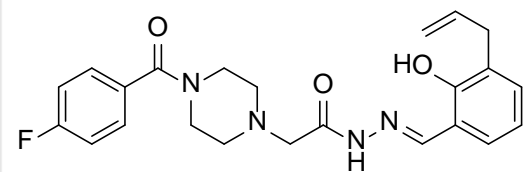

**7**  
 $^{19}\text{F}$ -NMR  
(470 MHz,  $\text{CDCl}_3$ )

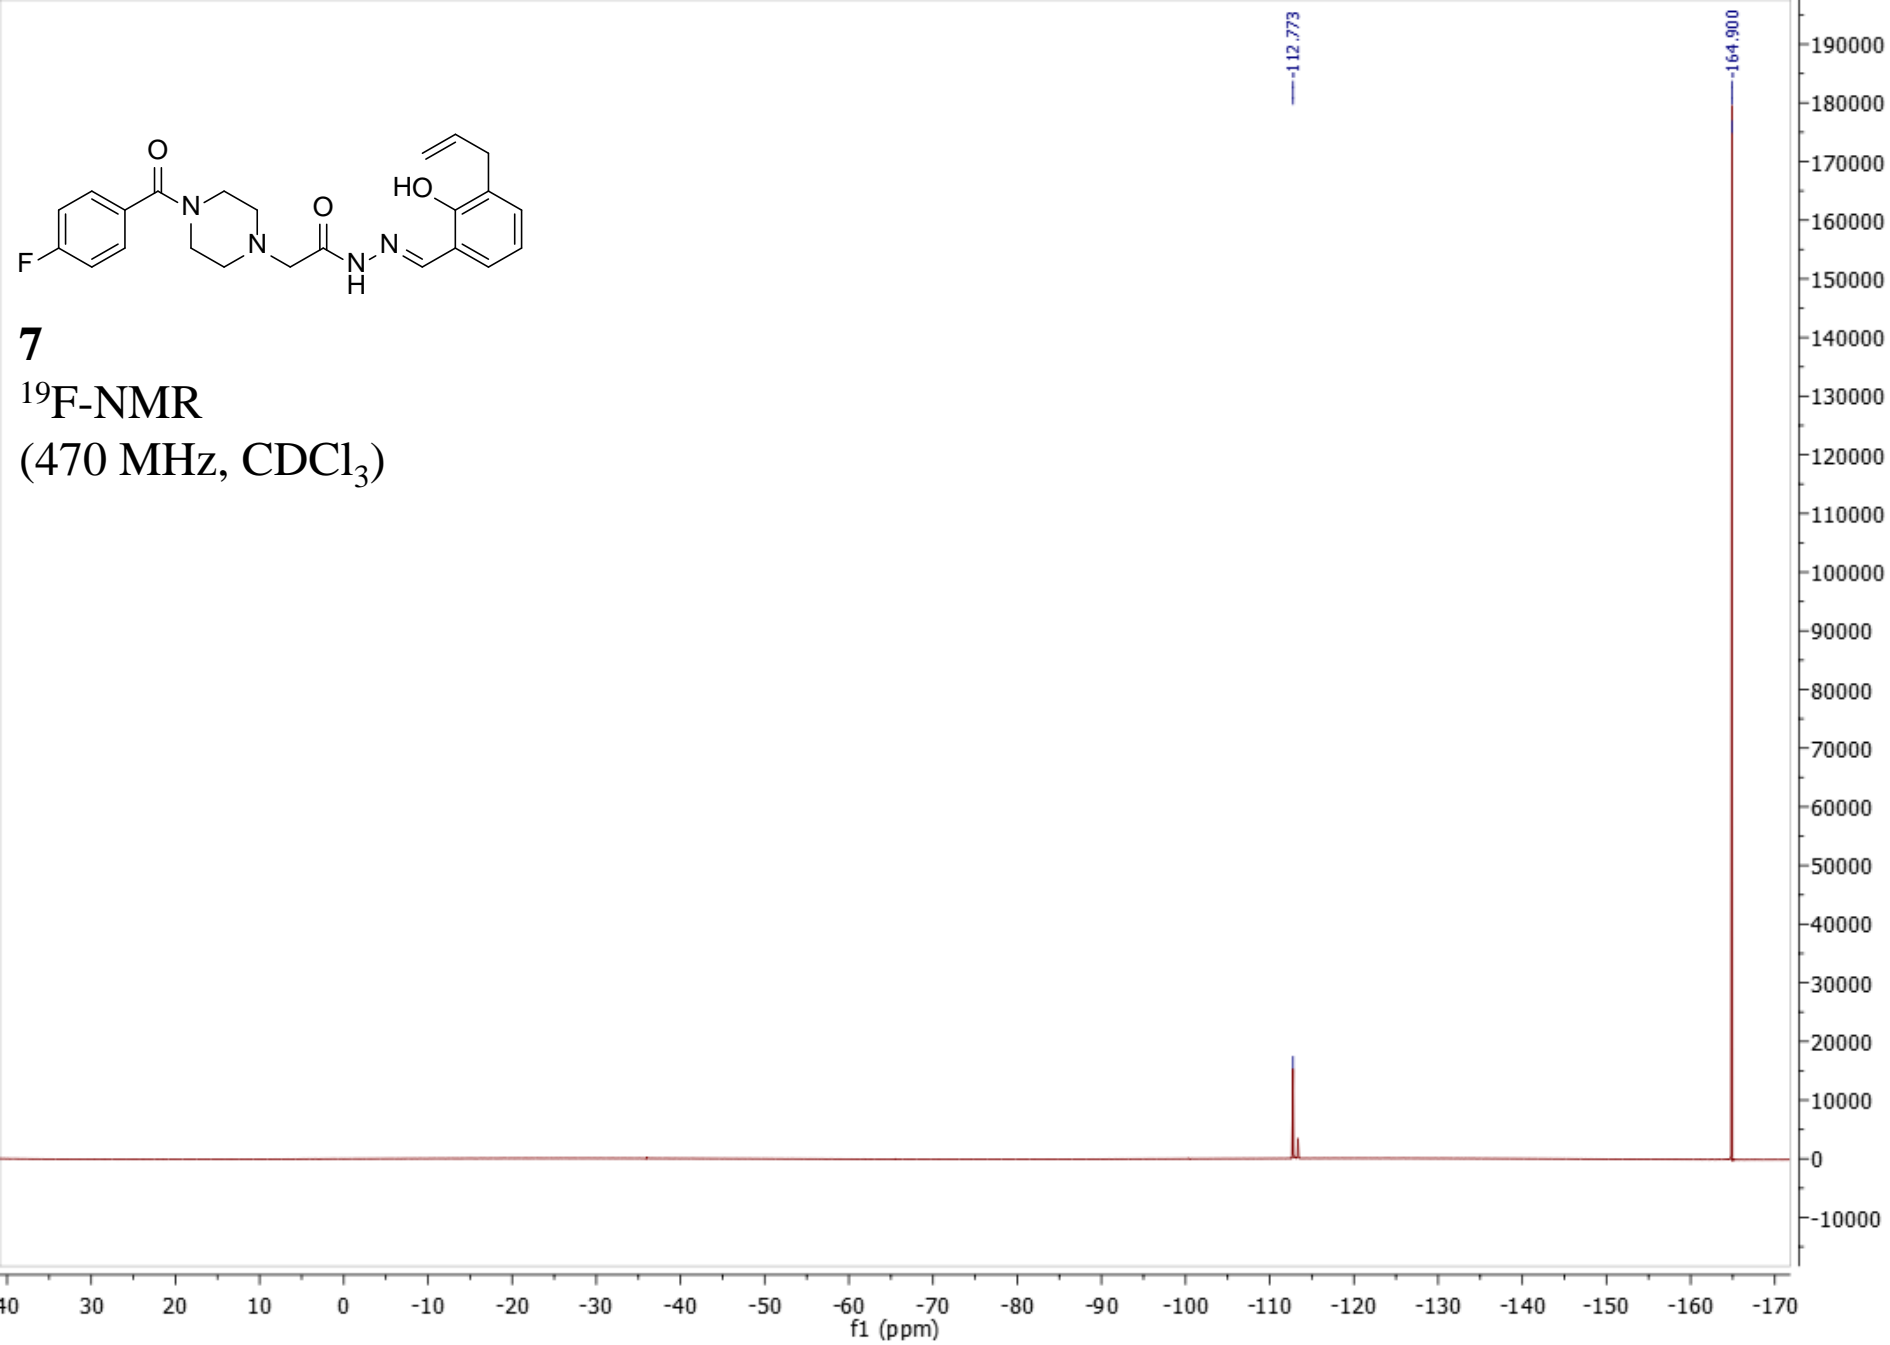

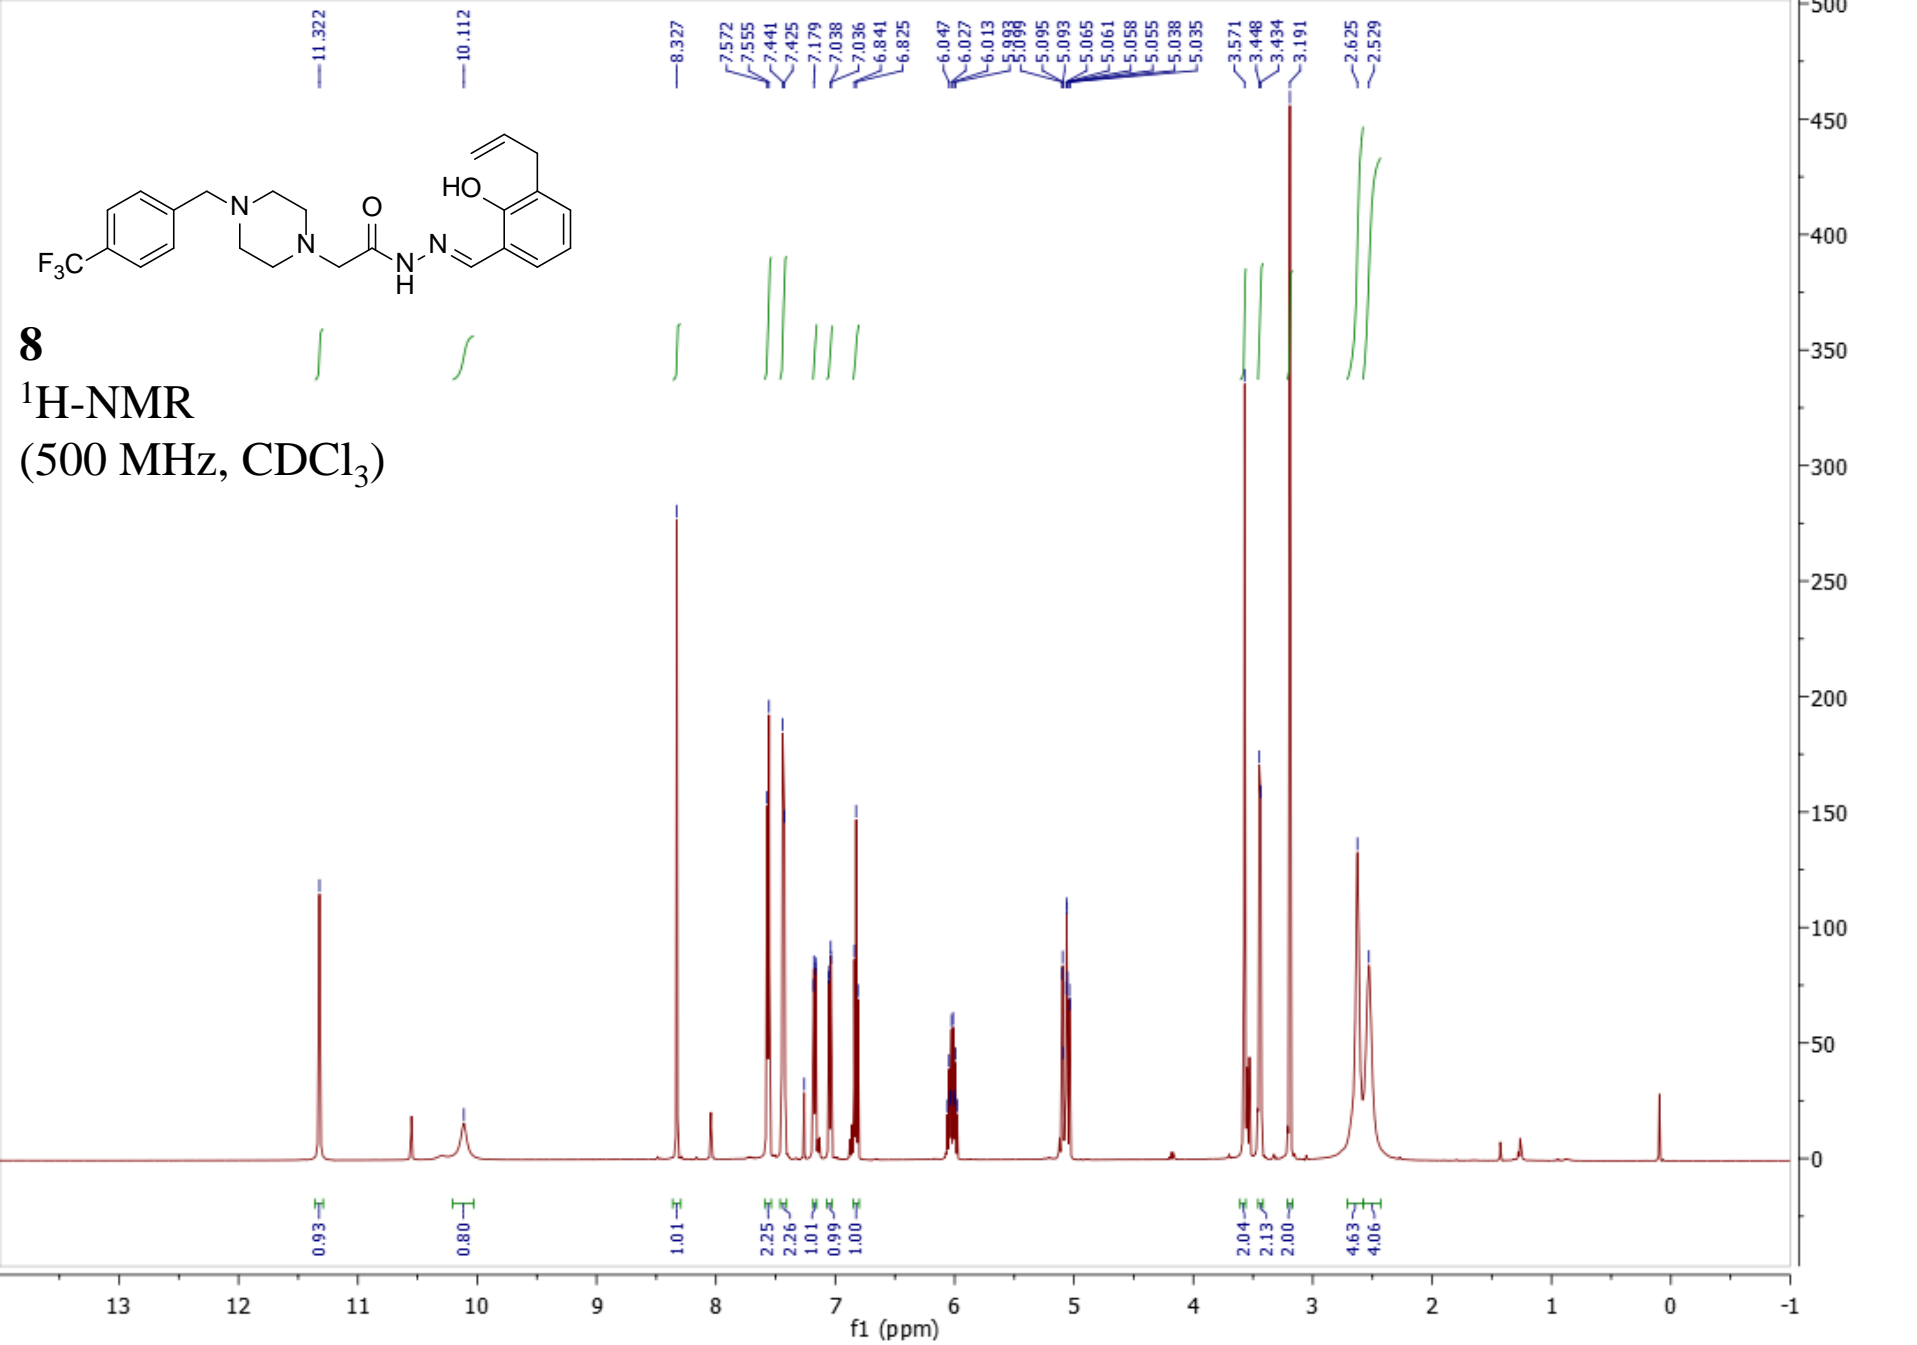



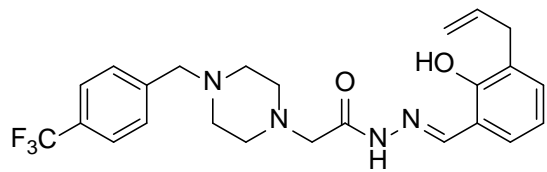

**8**  
 $^{19}\text{F}$ -NMR  
(470 MHz,  $\text{CDCl}_3$ )

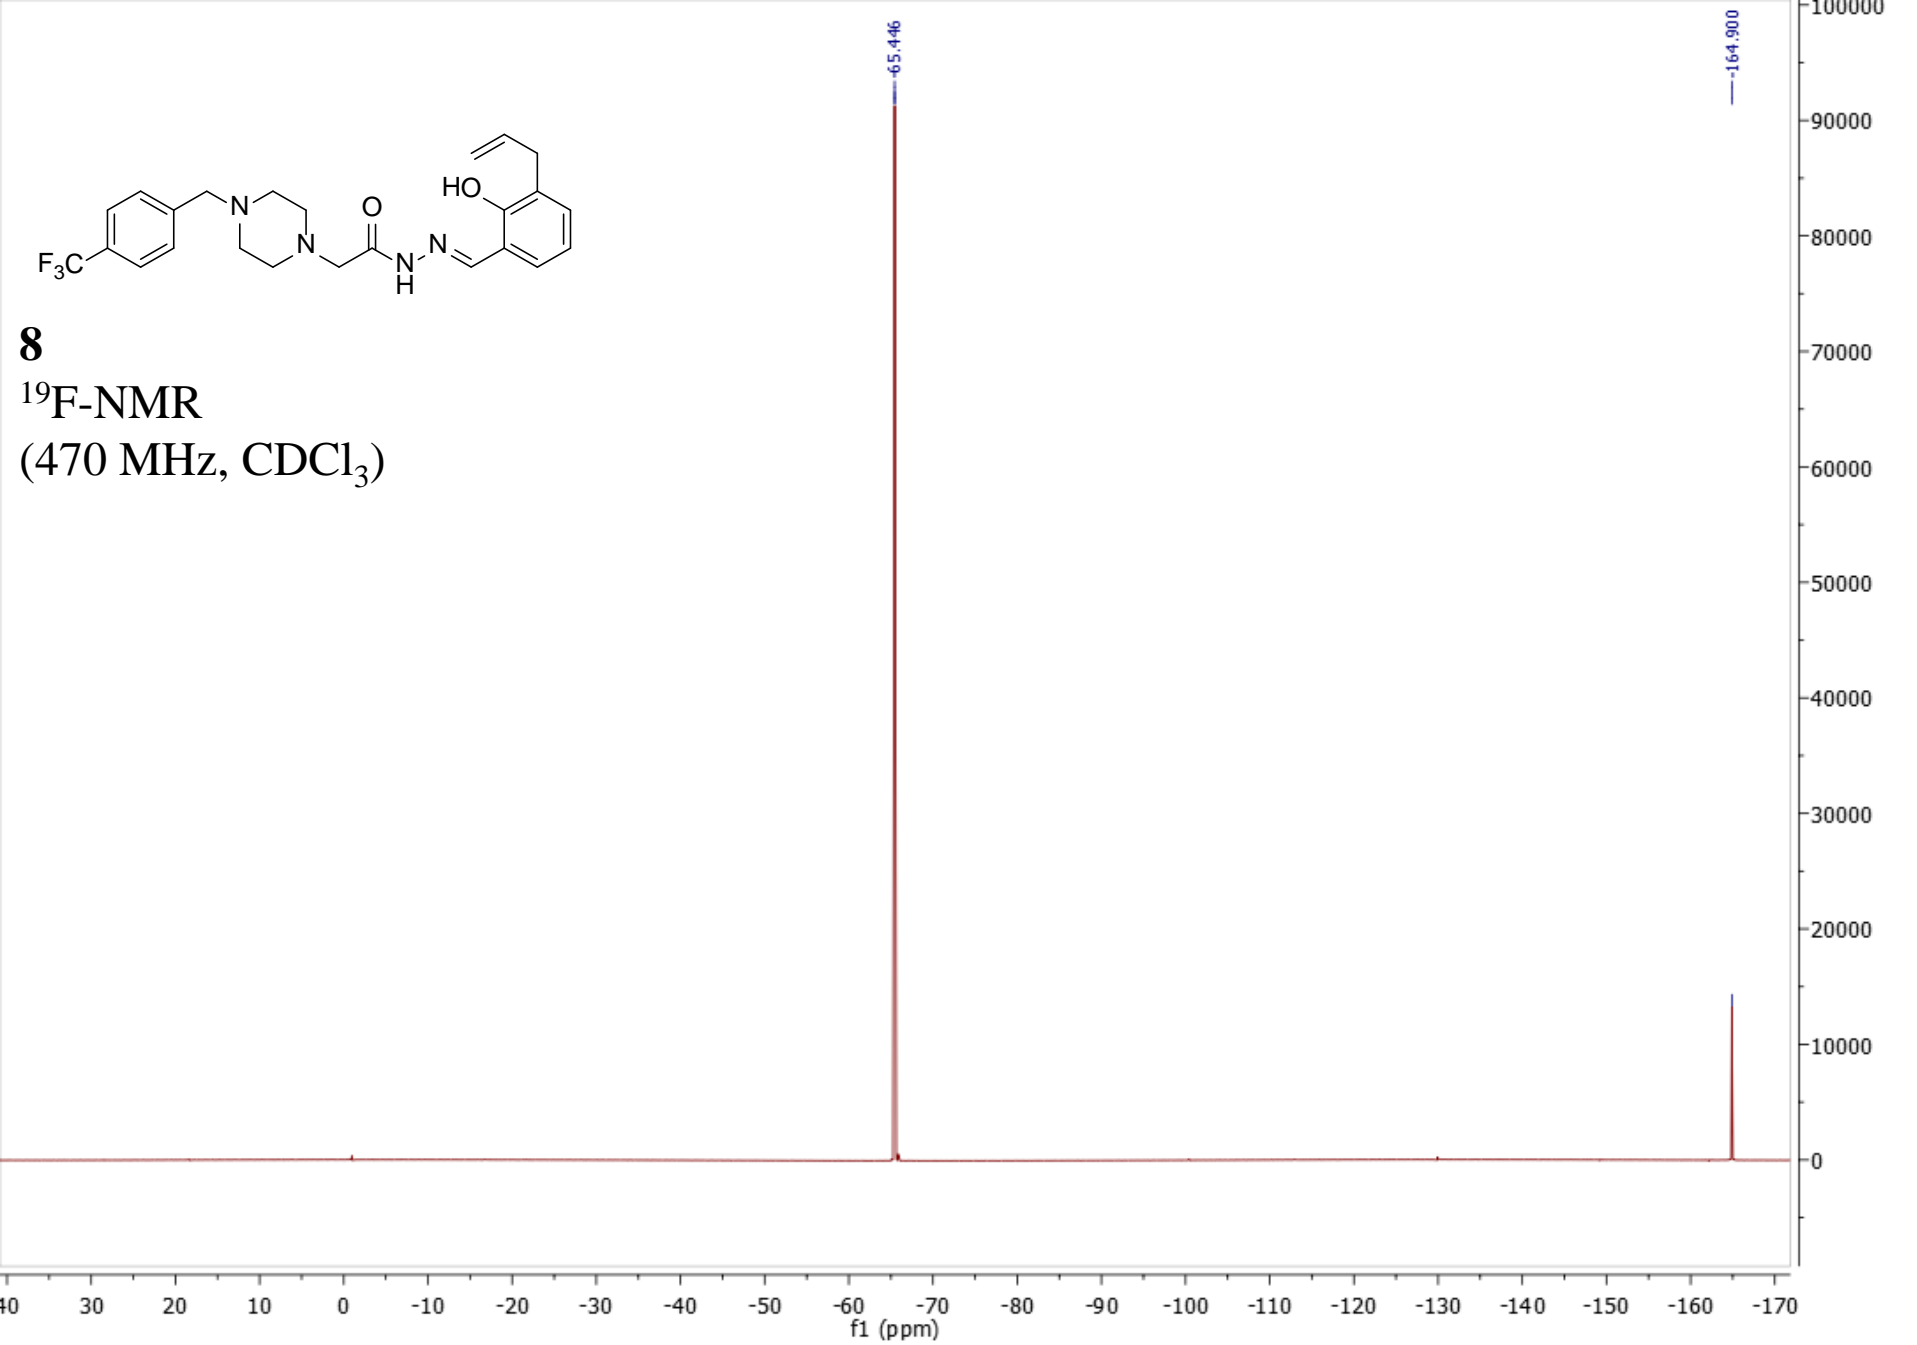

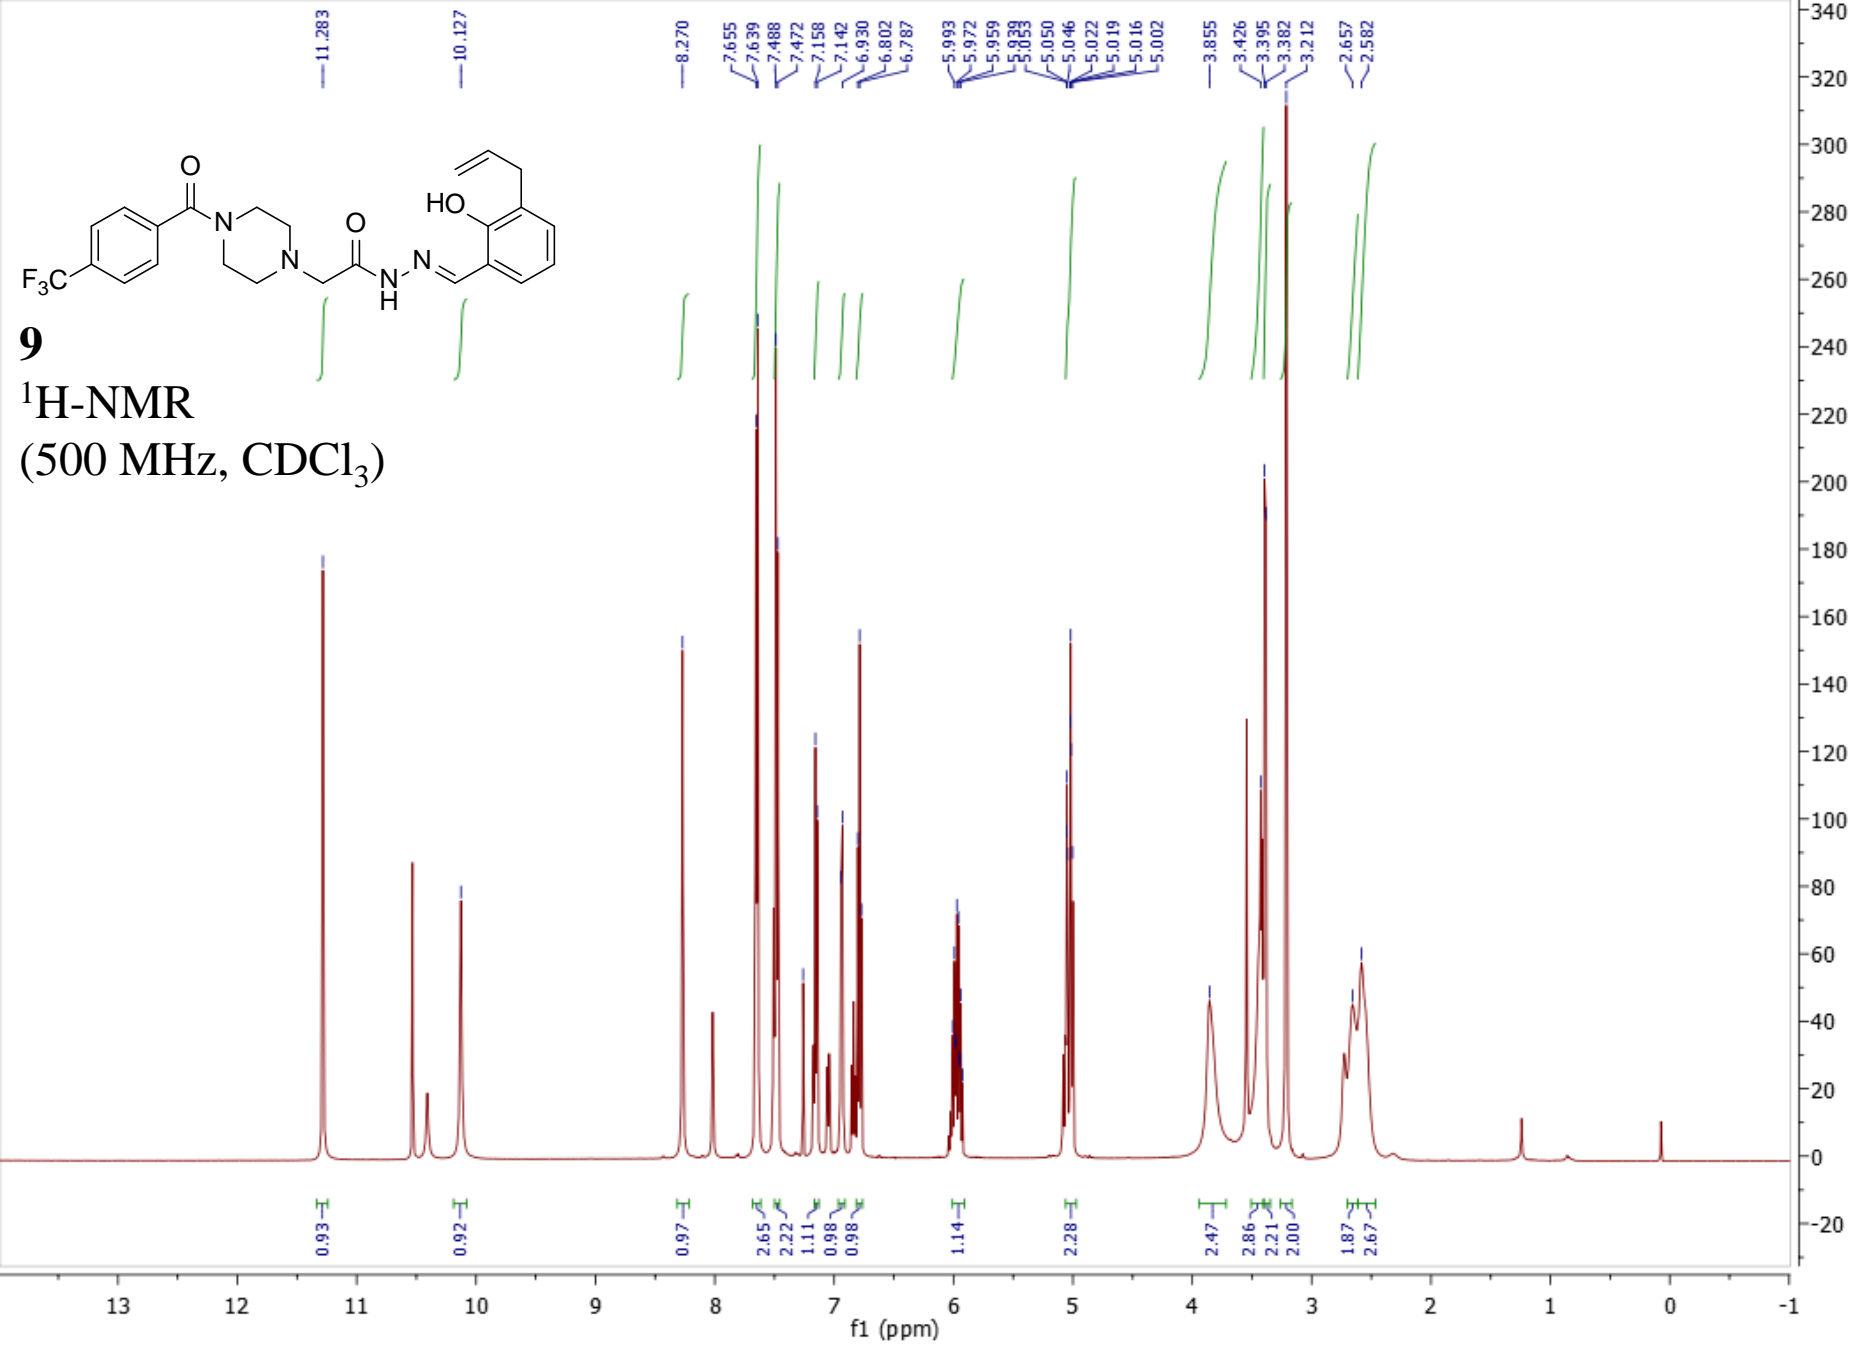

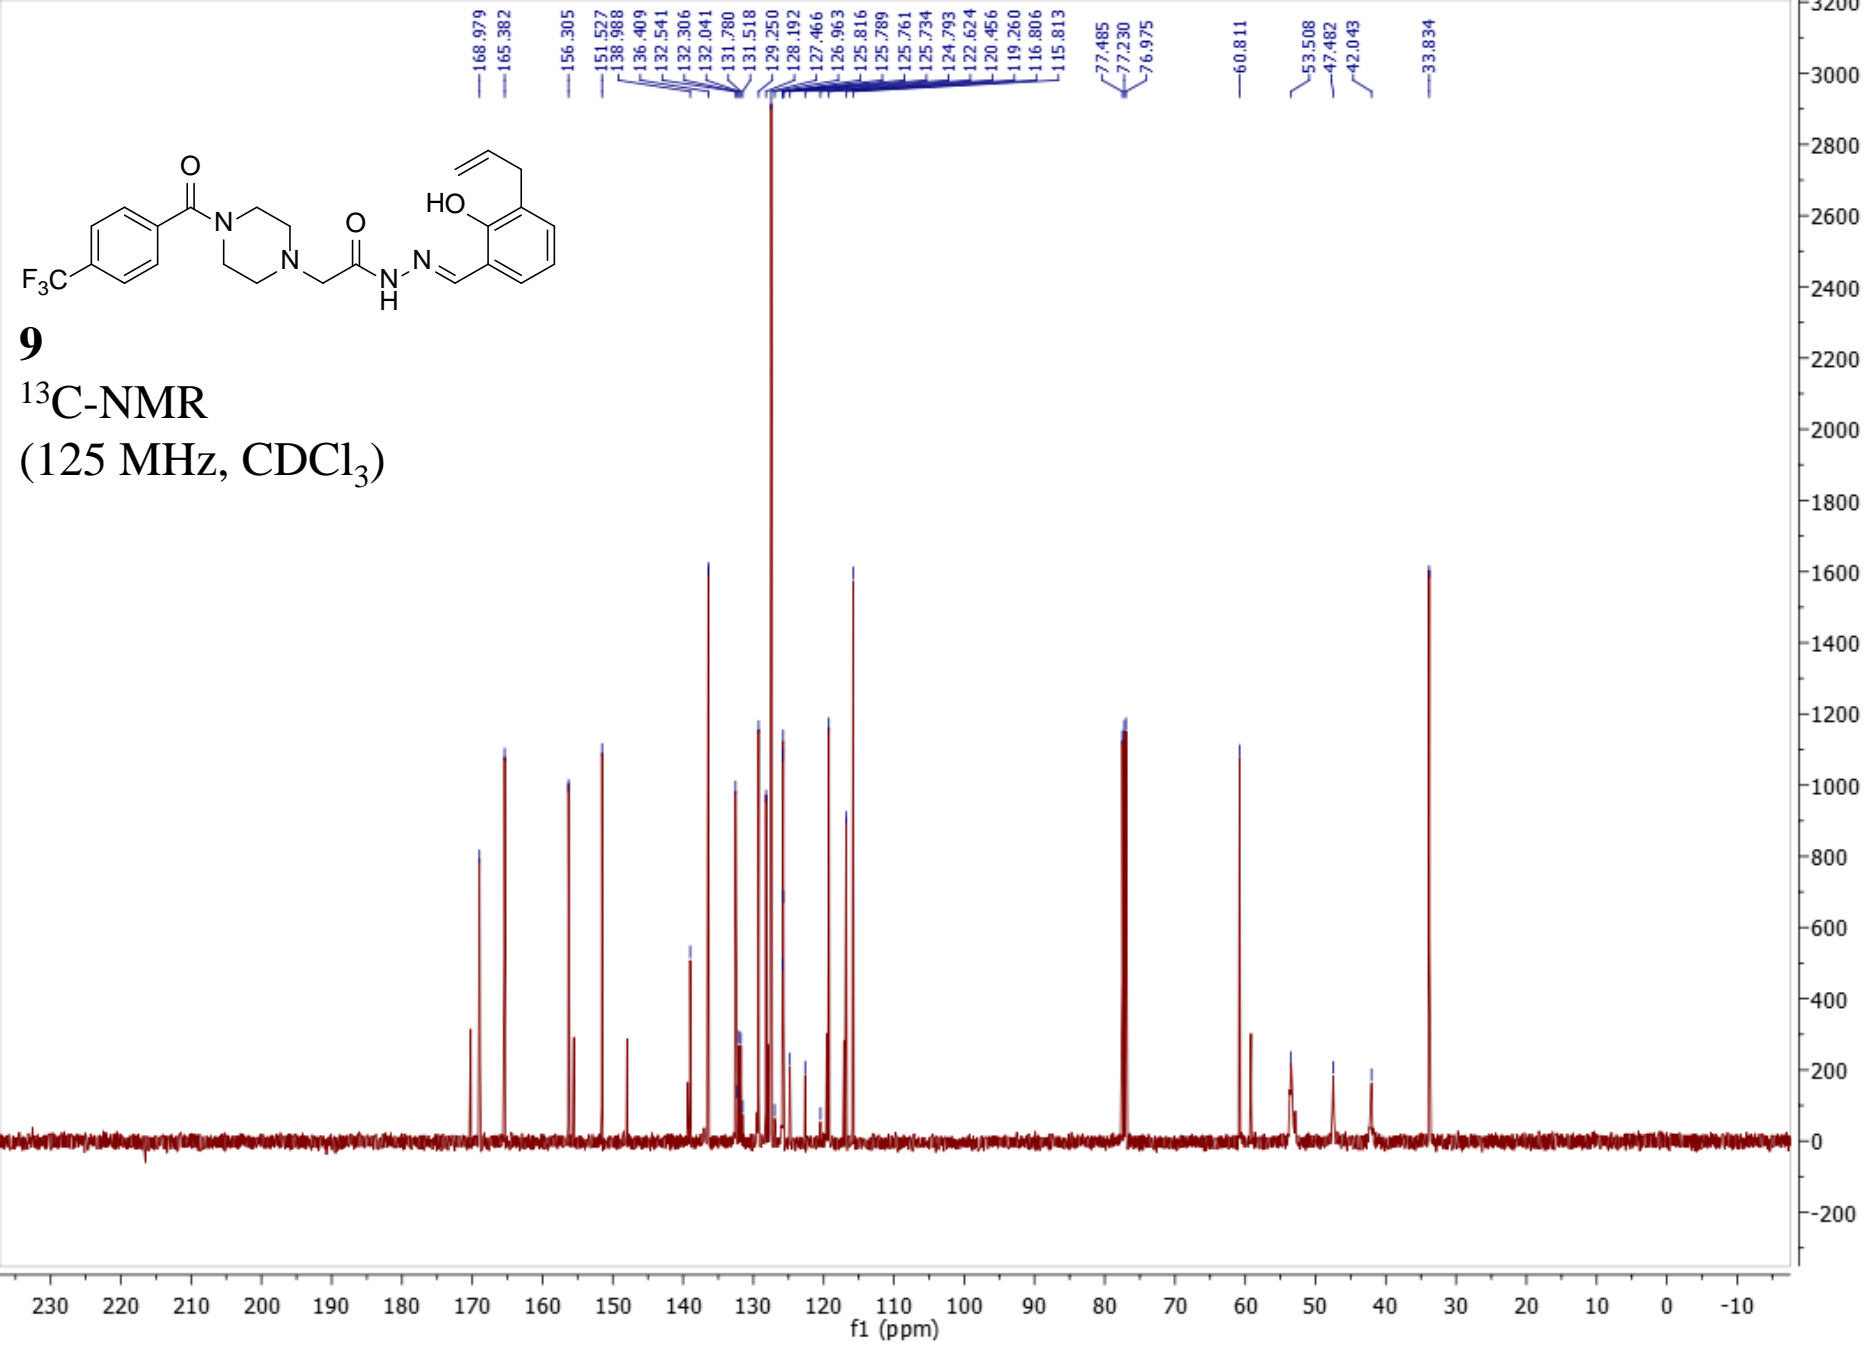

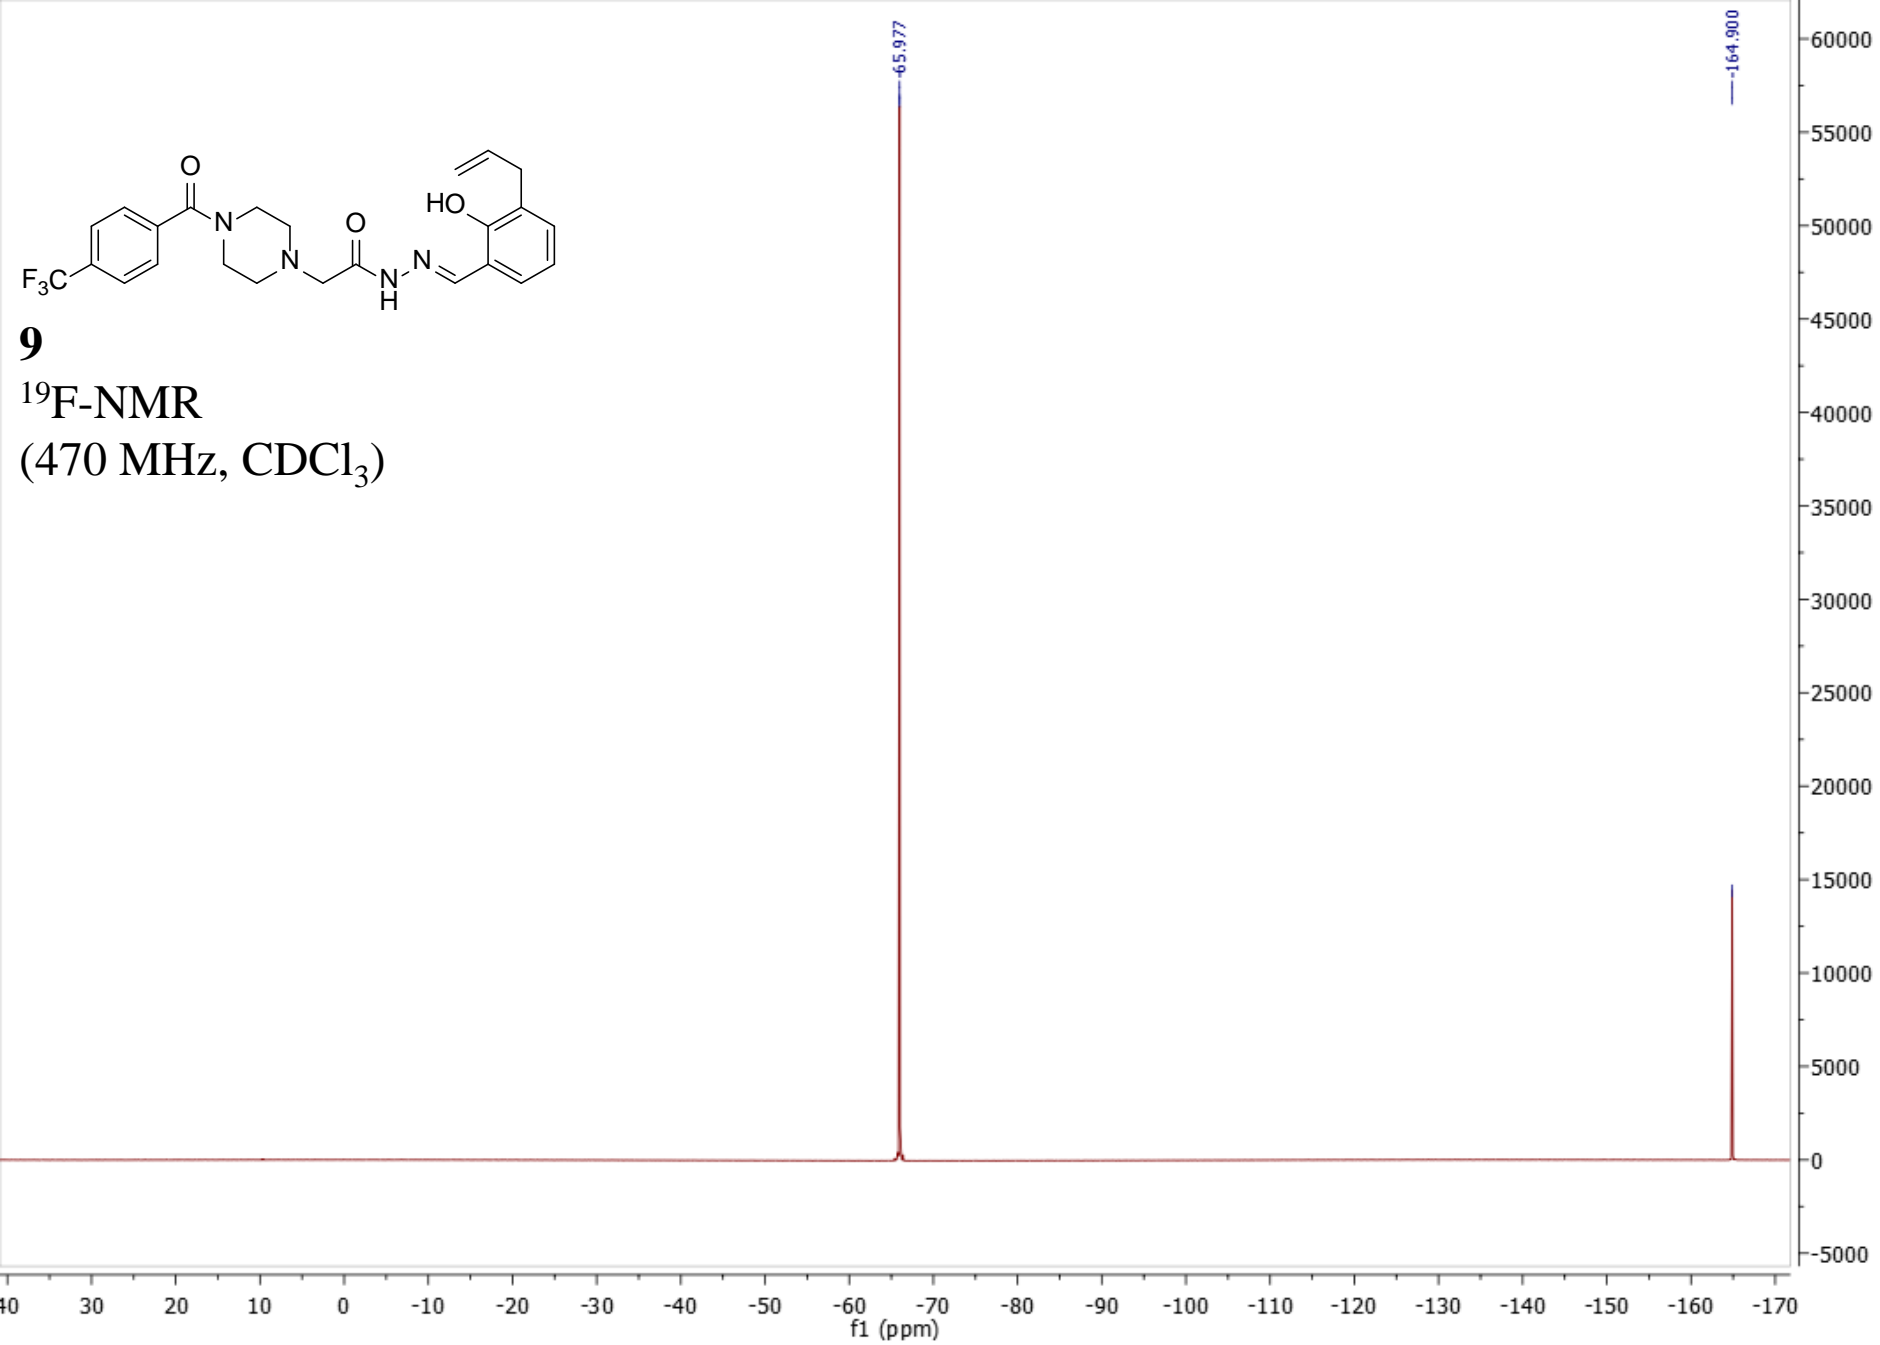

S80



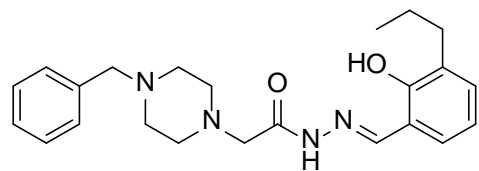

**10**

$^1\text{H-NMR}$

(500 MHz,  $\text{CDCl}_3$ )

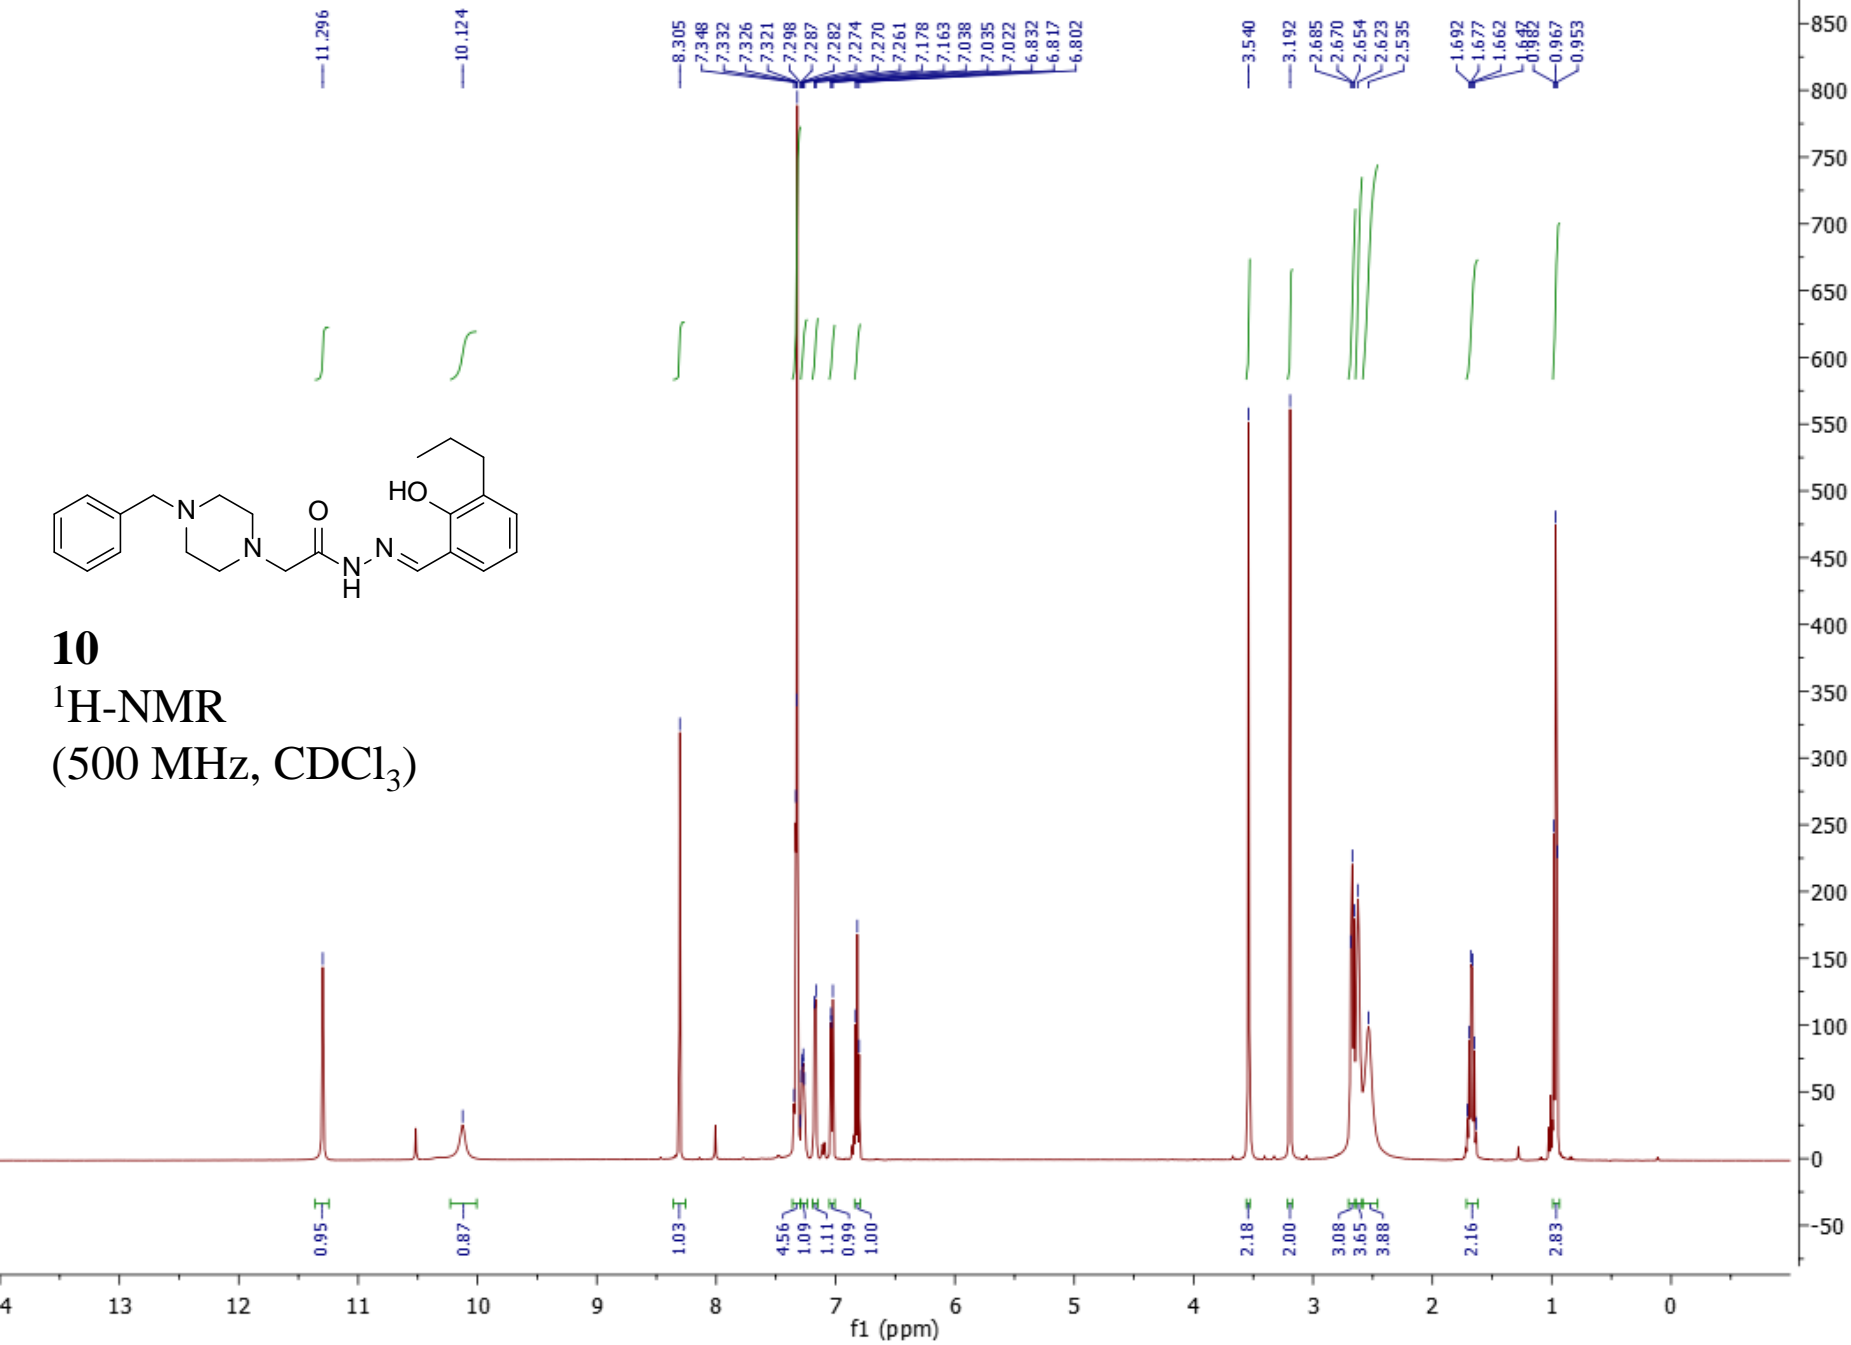



**10**  
 $^{13}\text{C}$ -NMR  
(125 MHz,  $\text{CDCl}_3$ )

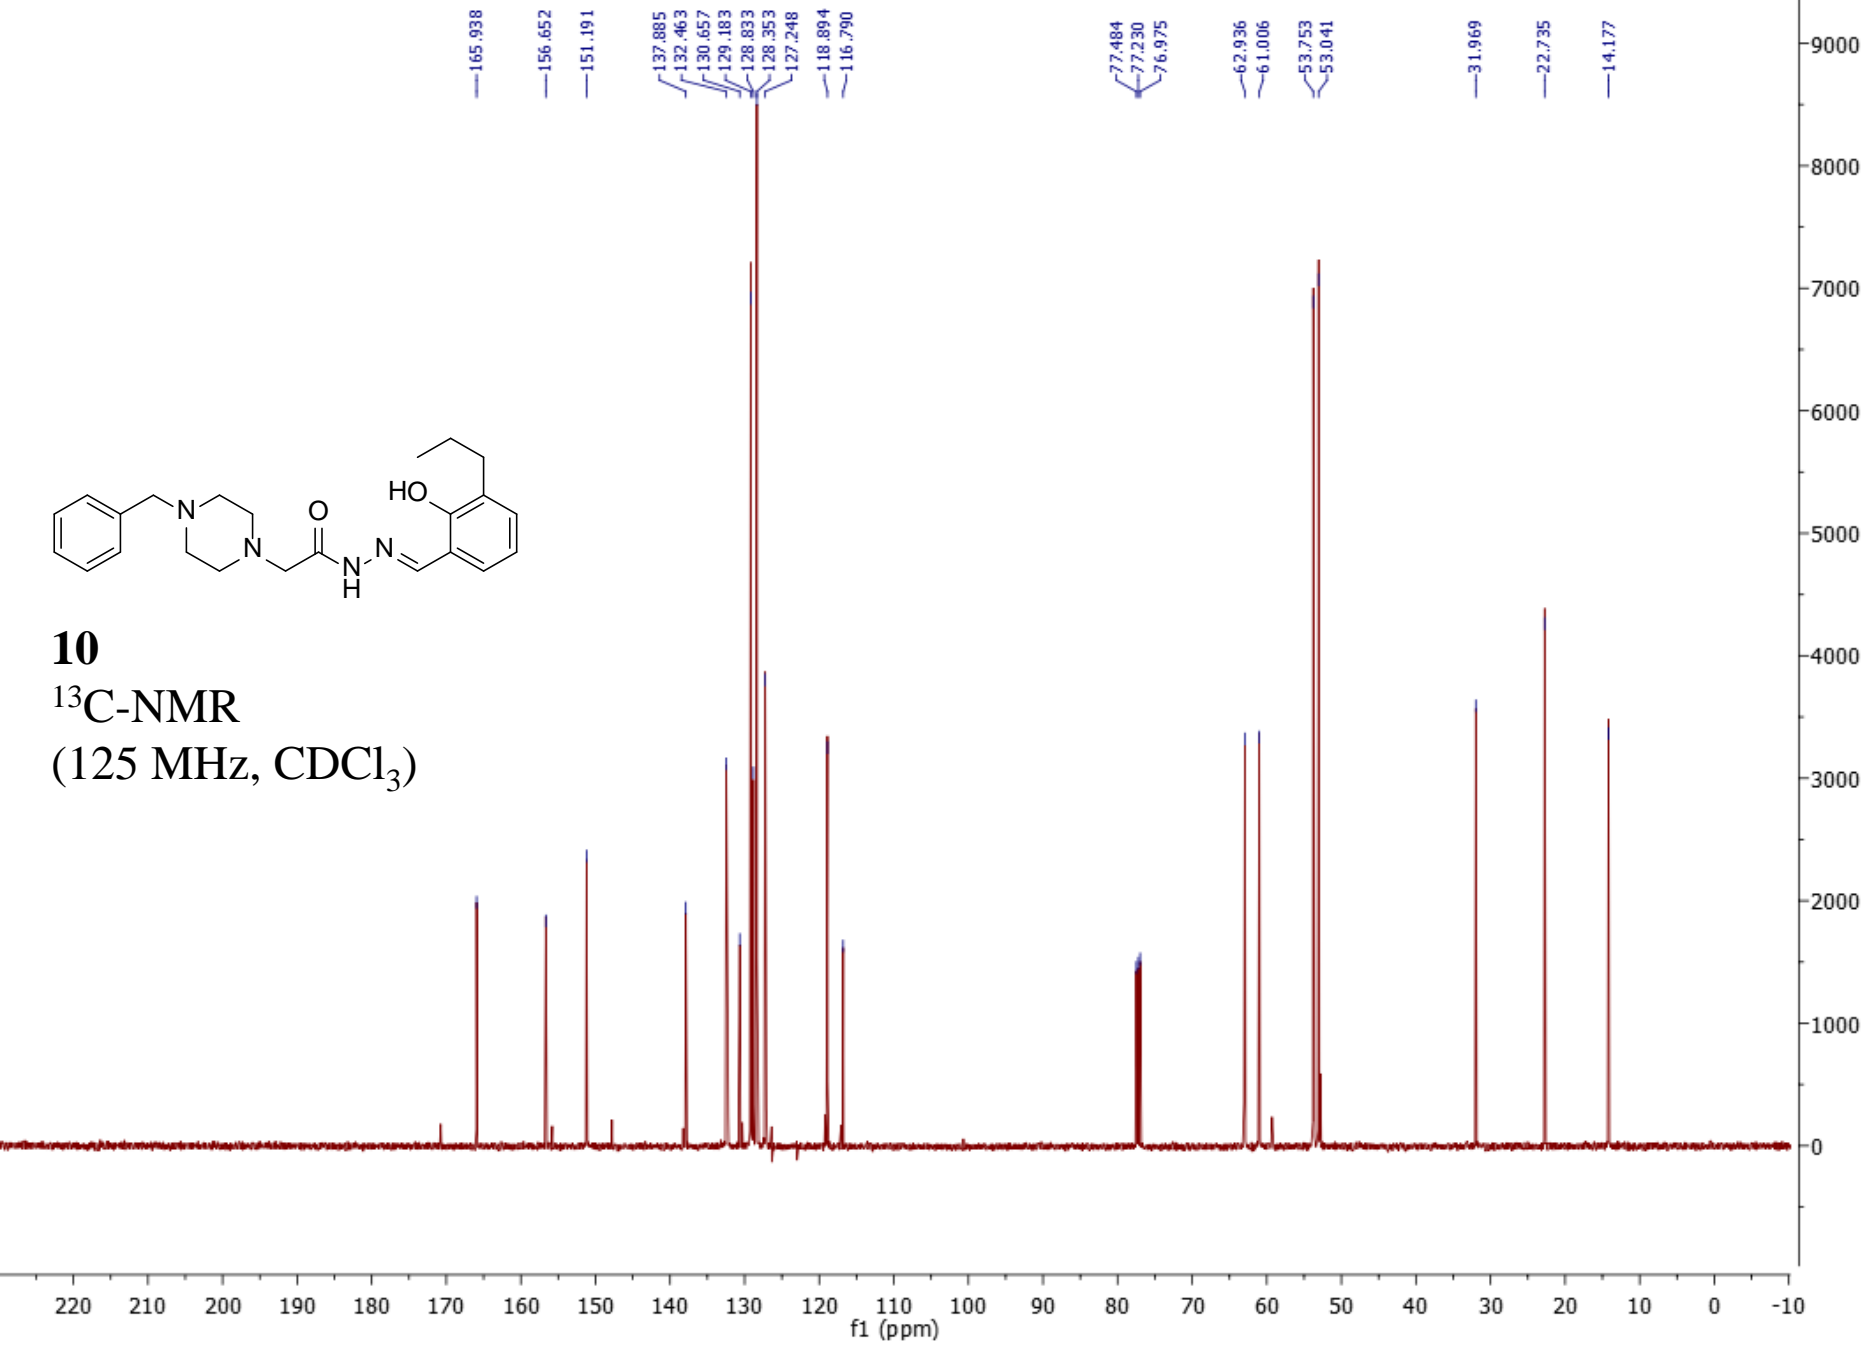

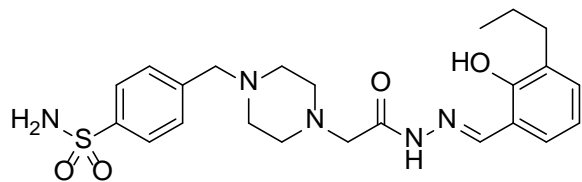

**11**

$^1\text{H-NMR}$

(500 MHz,  $(\text{CD}_3)_2\text{CO}$ )

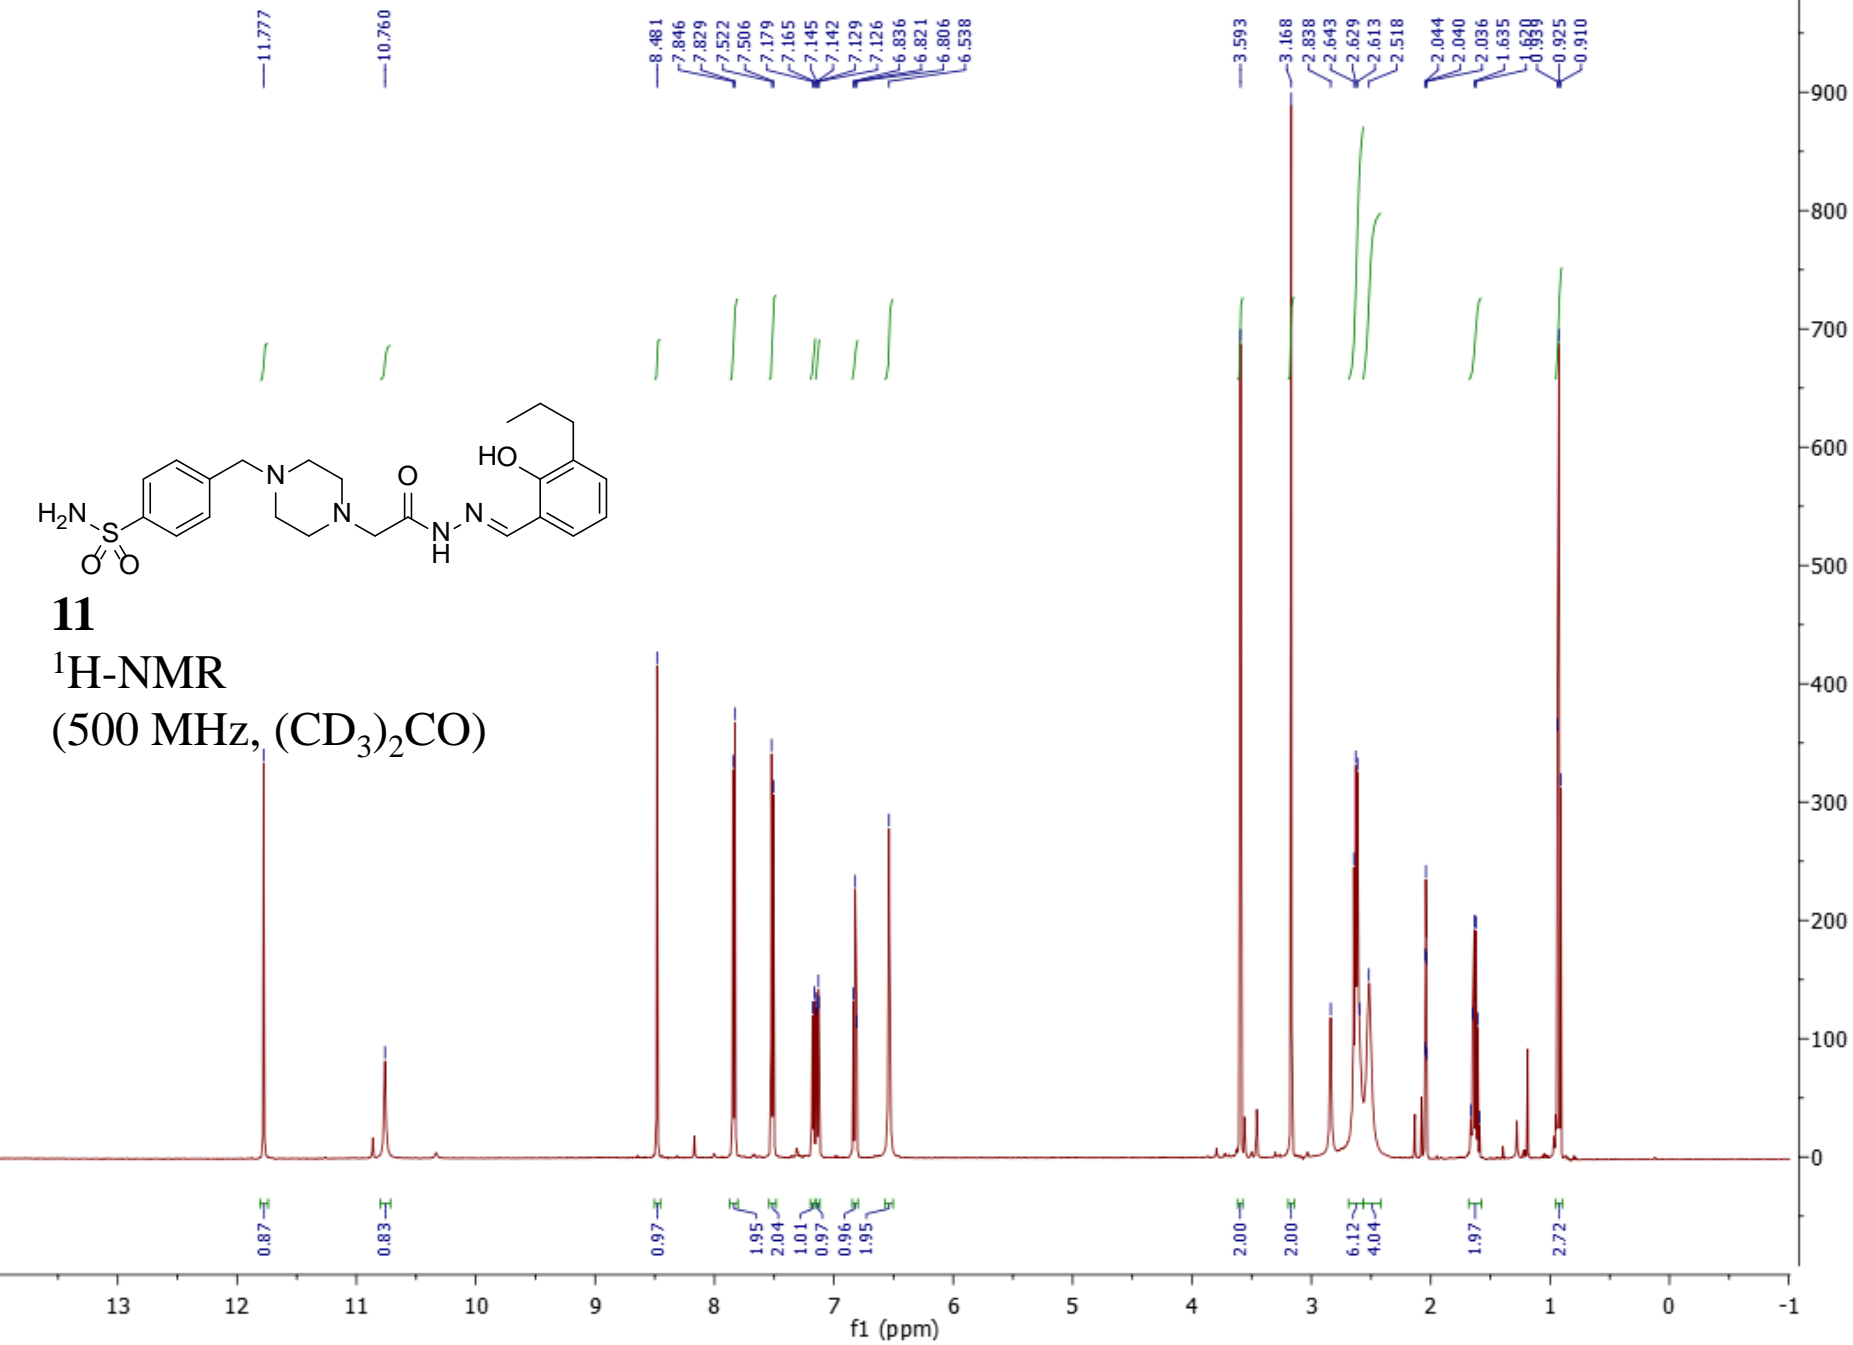

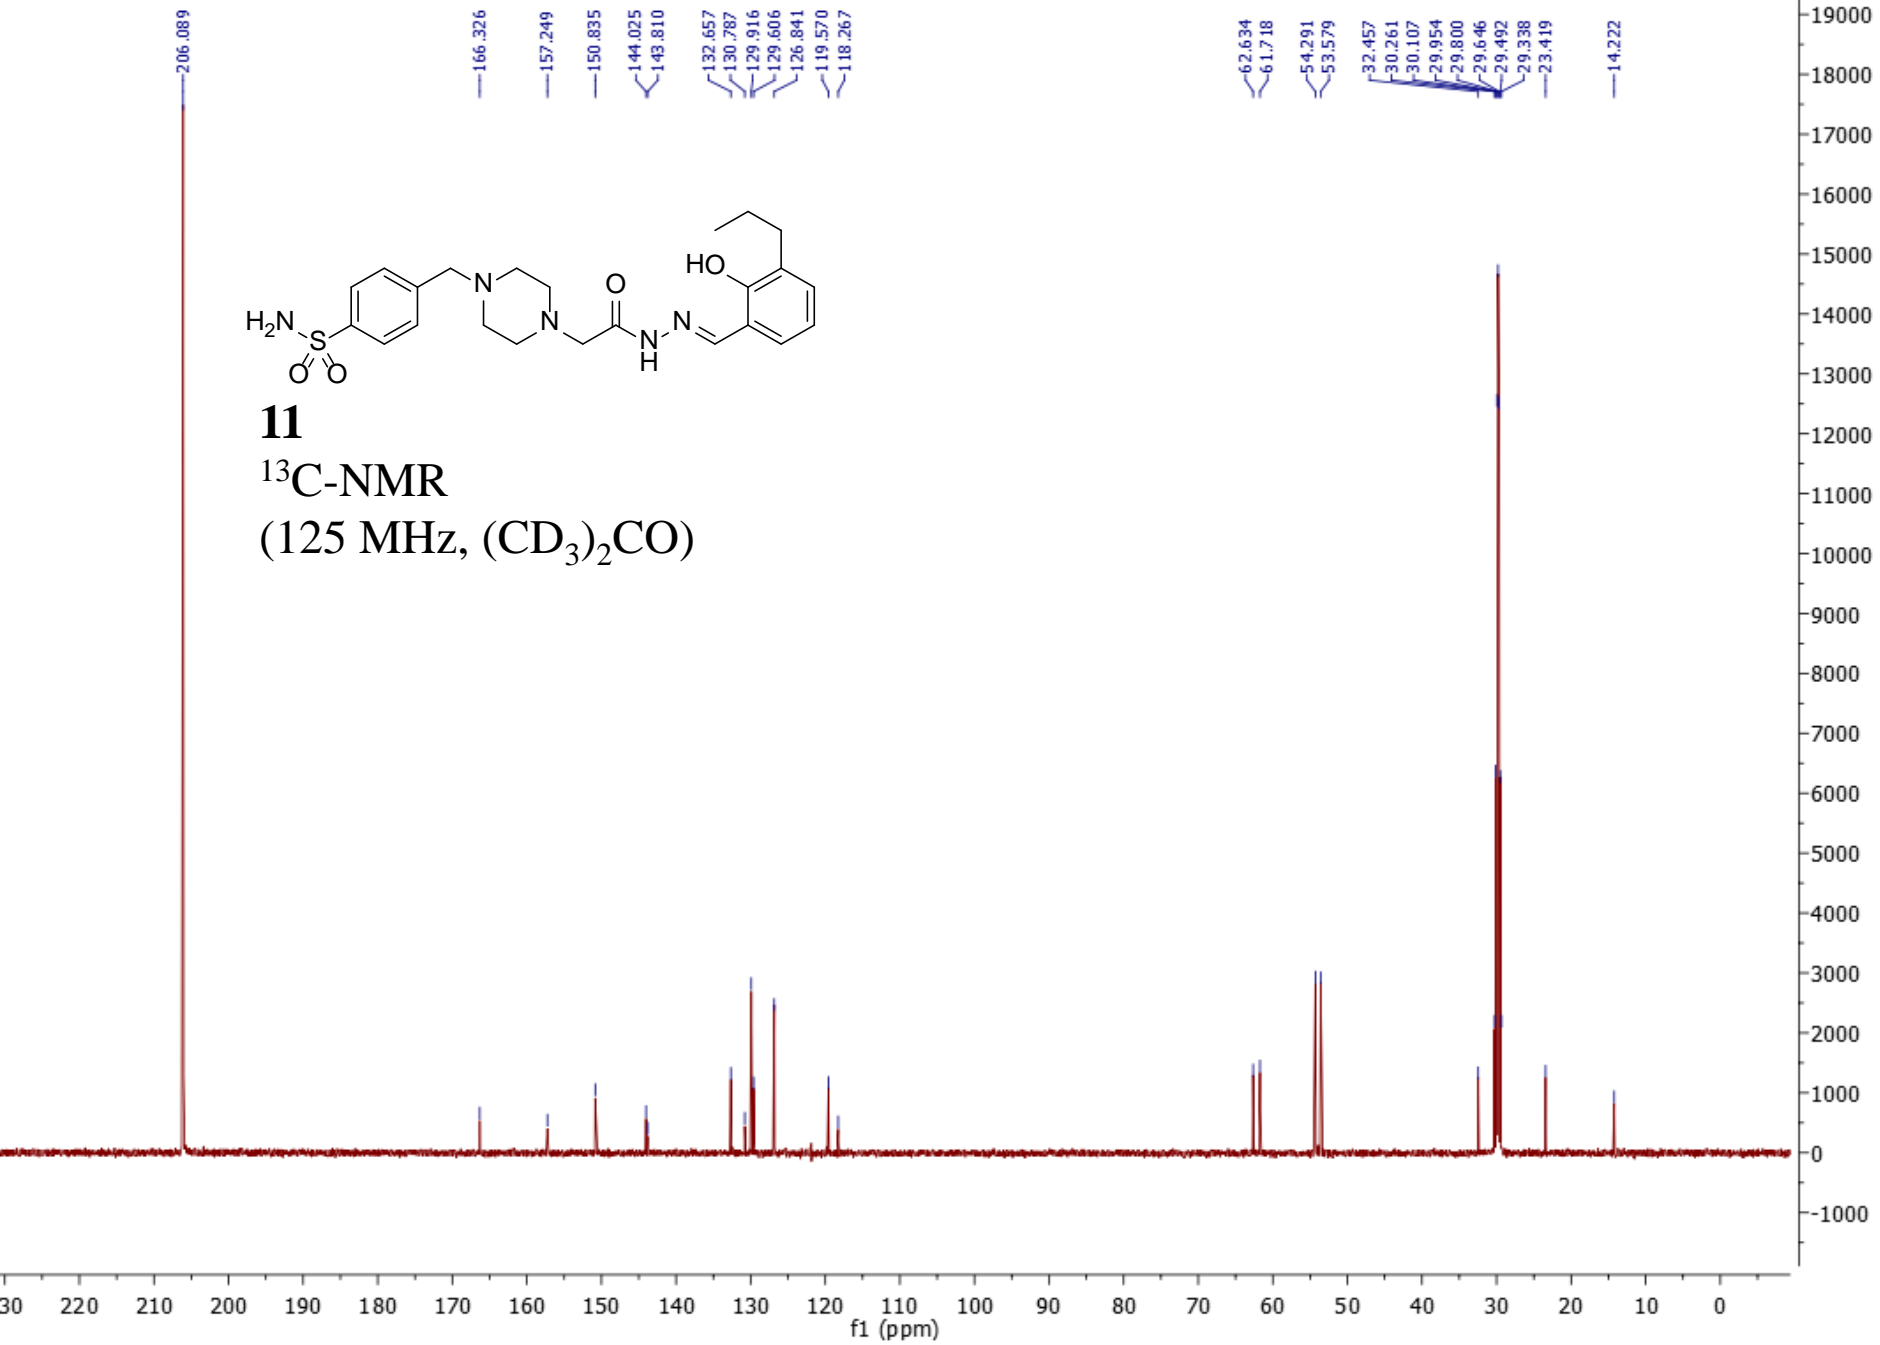

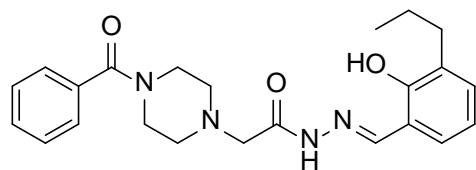

**12**  
 $^1\text{H-NMR}$   
 (500 MHz,  $\text{CDCl}_3$ )

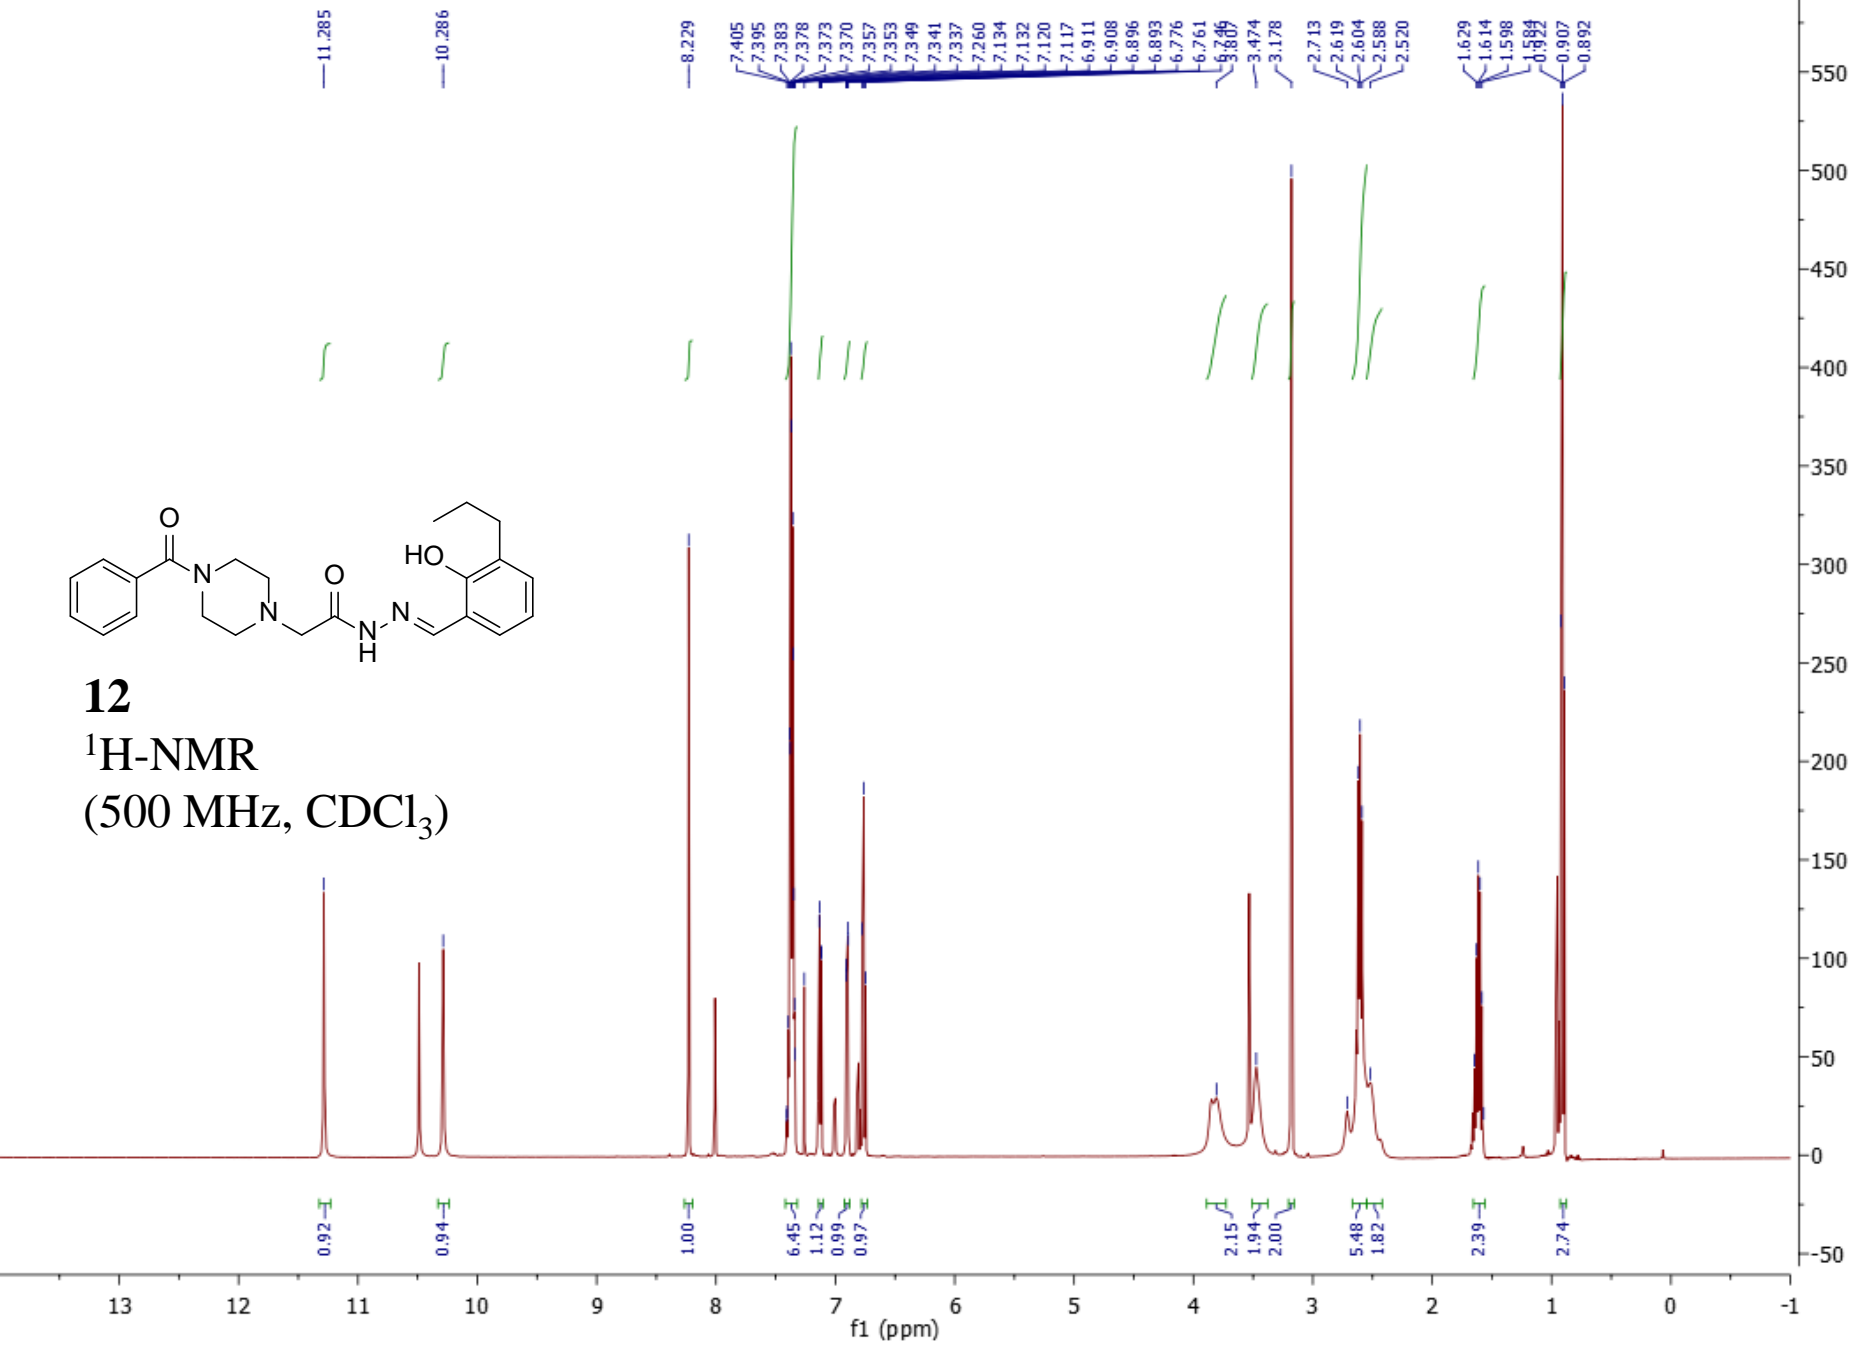



**12**  
 $^{13}\text{C}$ -NMR  
(125 MHz,  $\text{CDCl}_3$ )

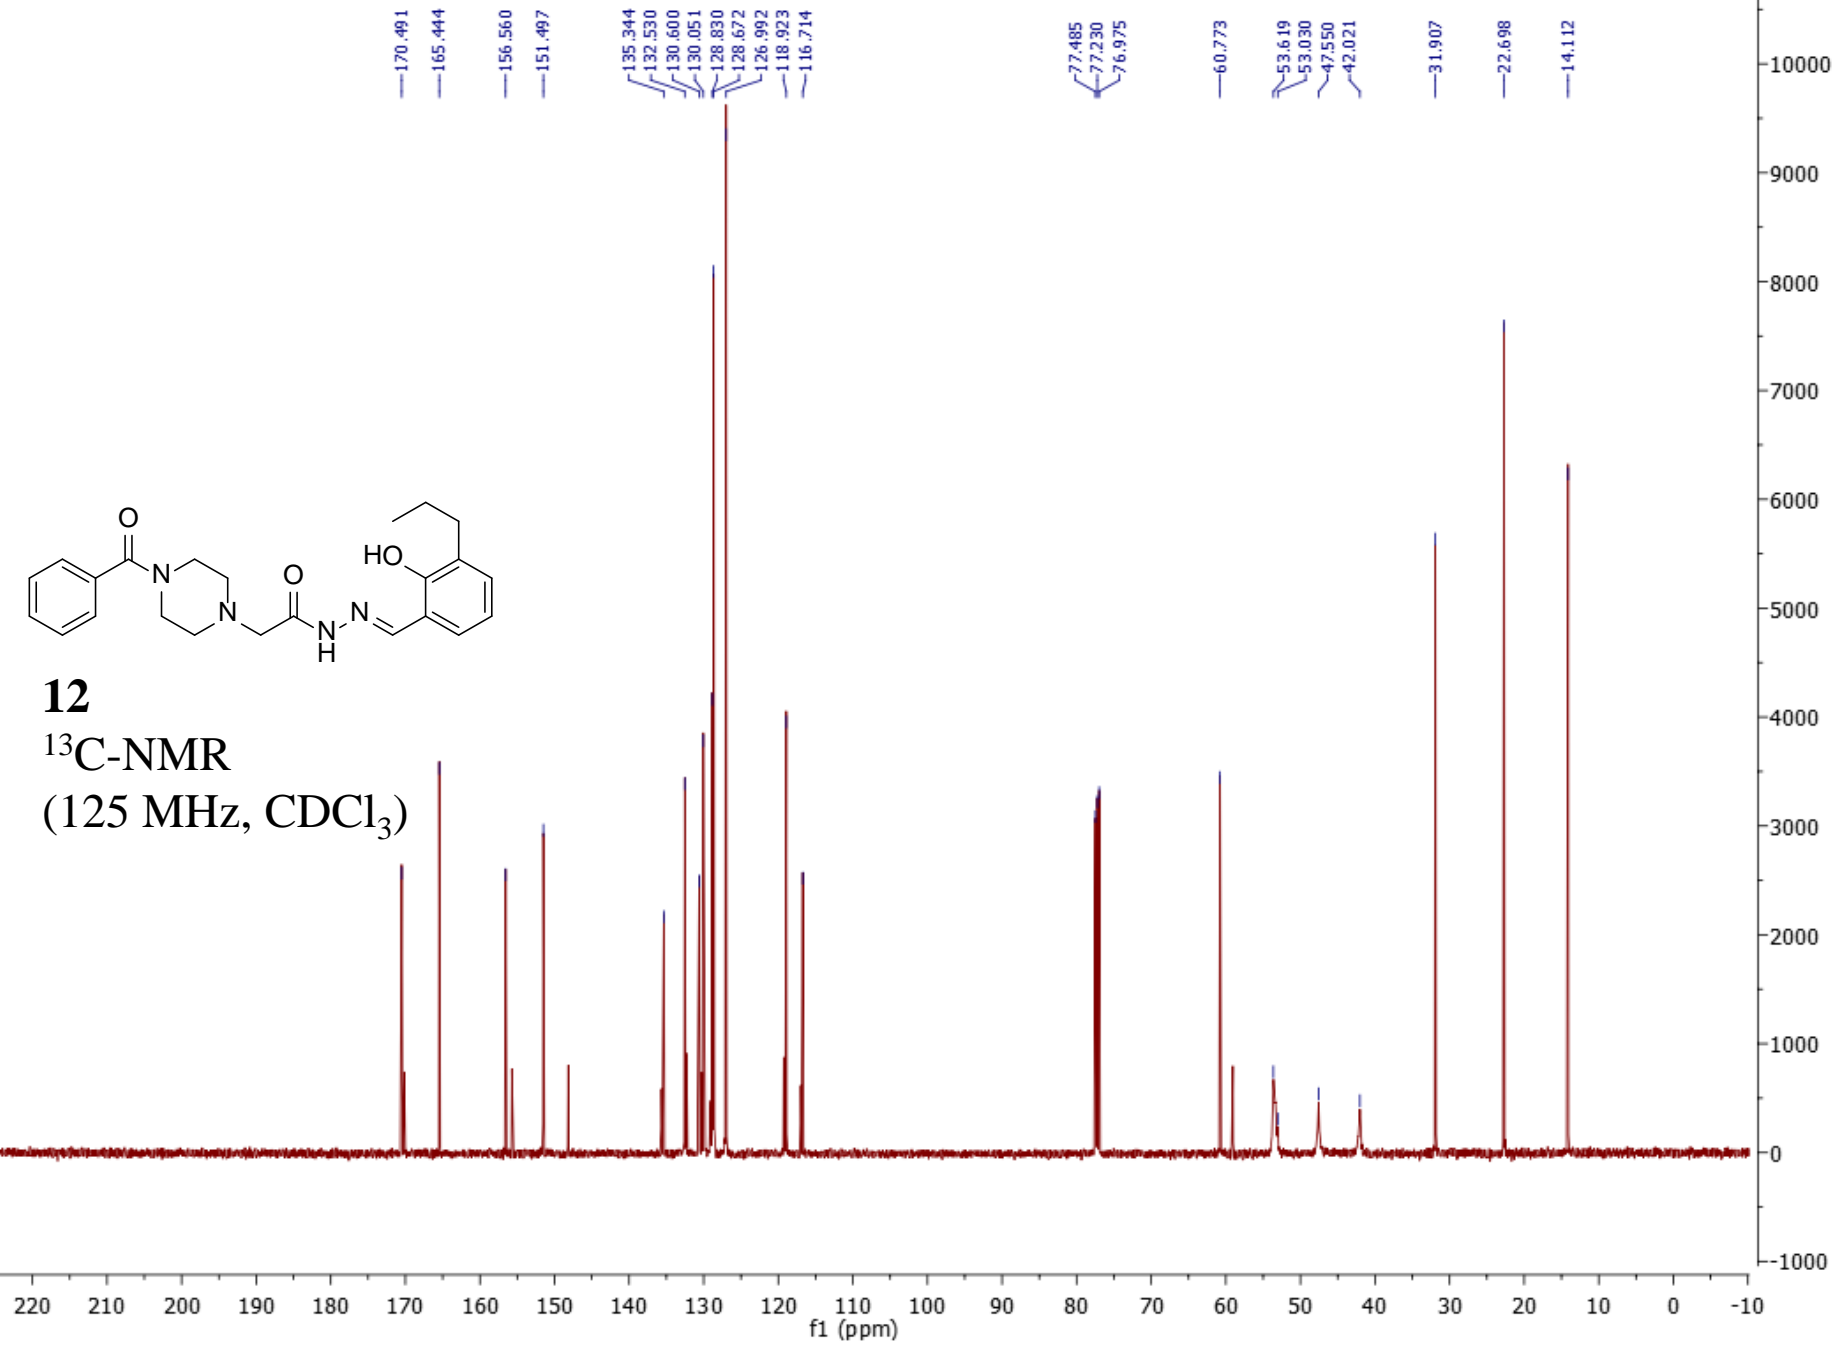

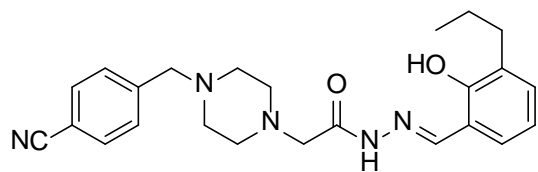

**13**  
 $^1\text{H-NMR}$   
 (500 MHz,  $\text{CDCl}_3$ )

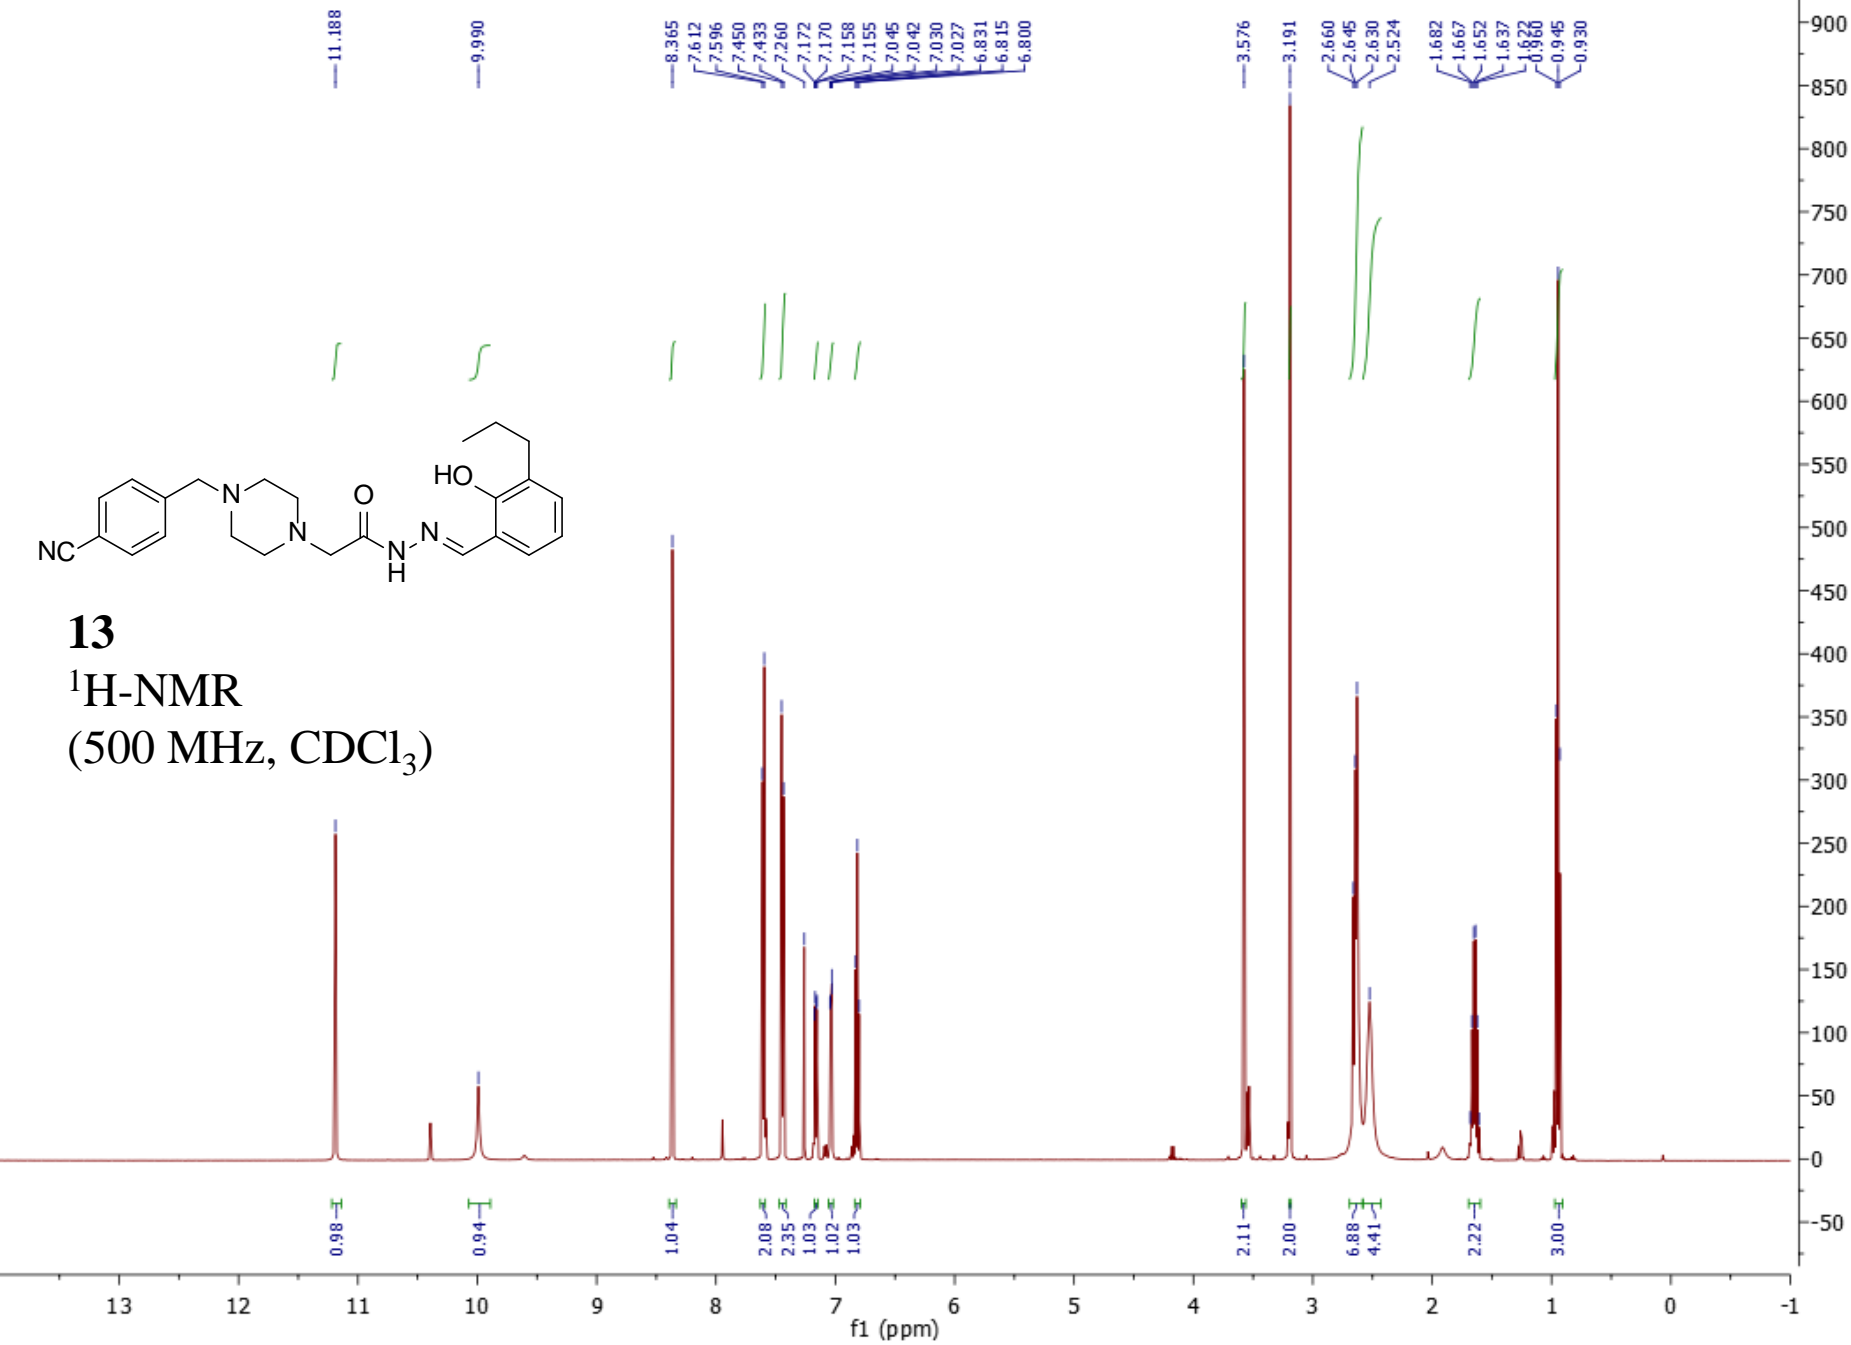



**13**  
<sup>13</sup>C-NMR  
(125 MHz, CDCl<sub>3</sub>)

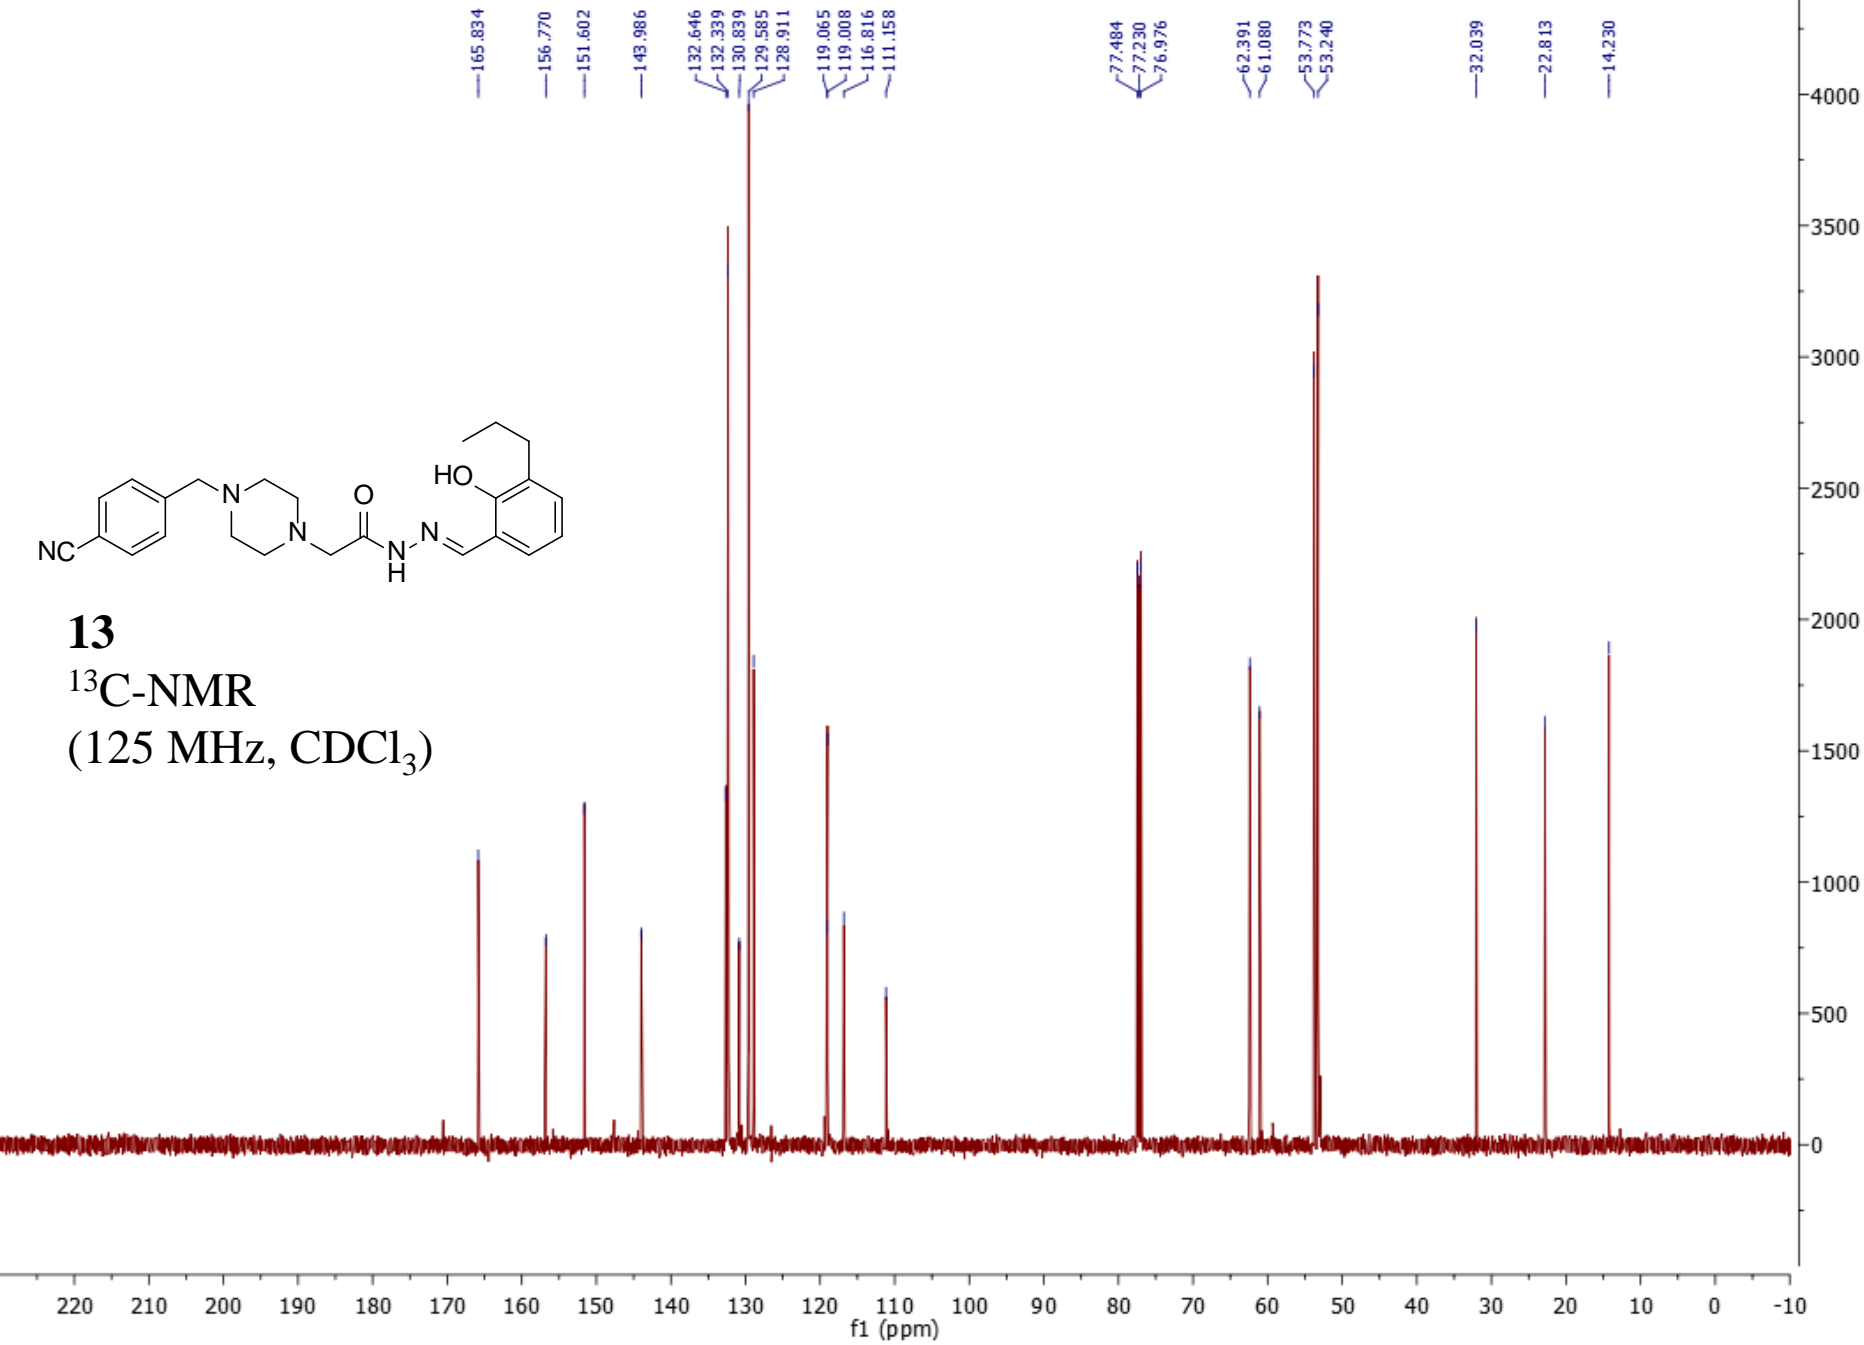



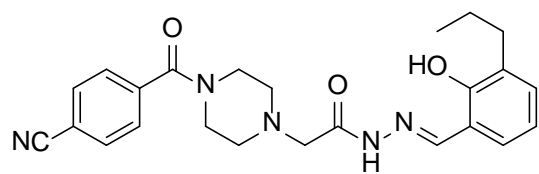

**14**

$^1\text{H-NMR}$   
(500 MHz,  $\text{CDCl}_3$ )

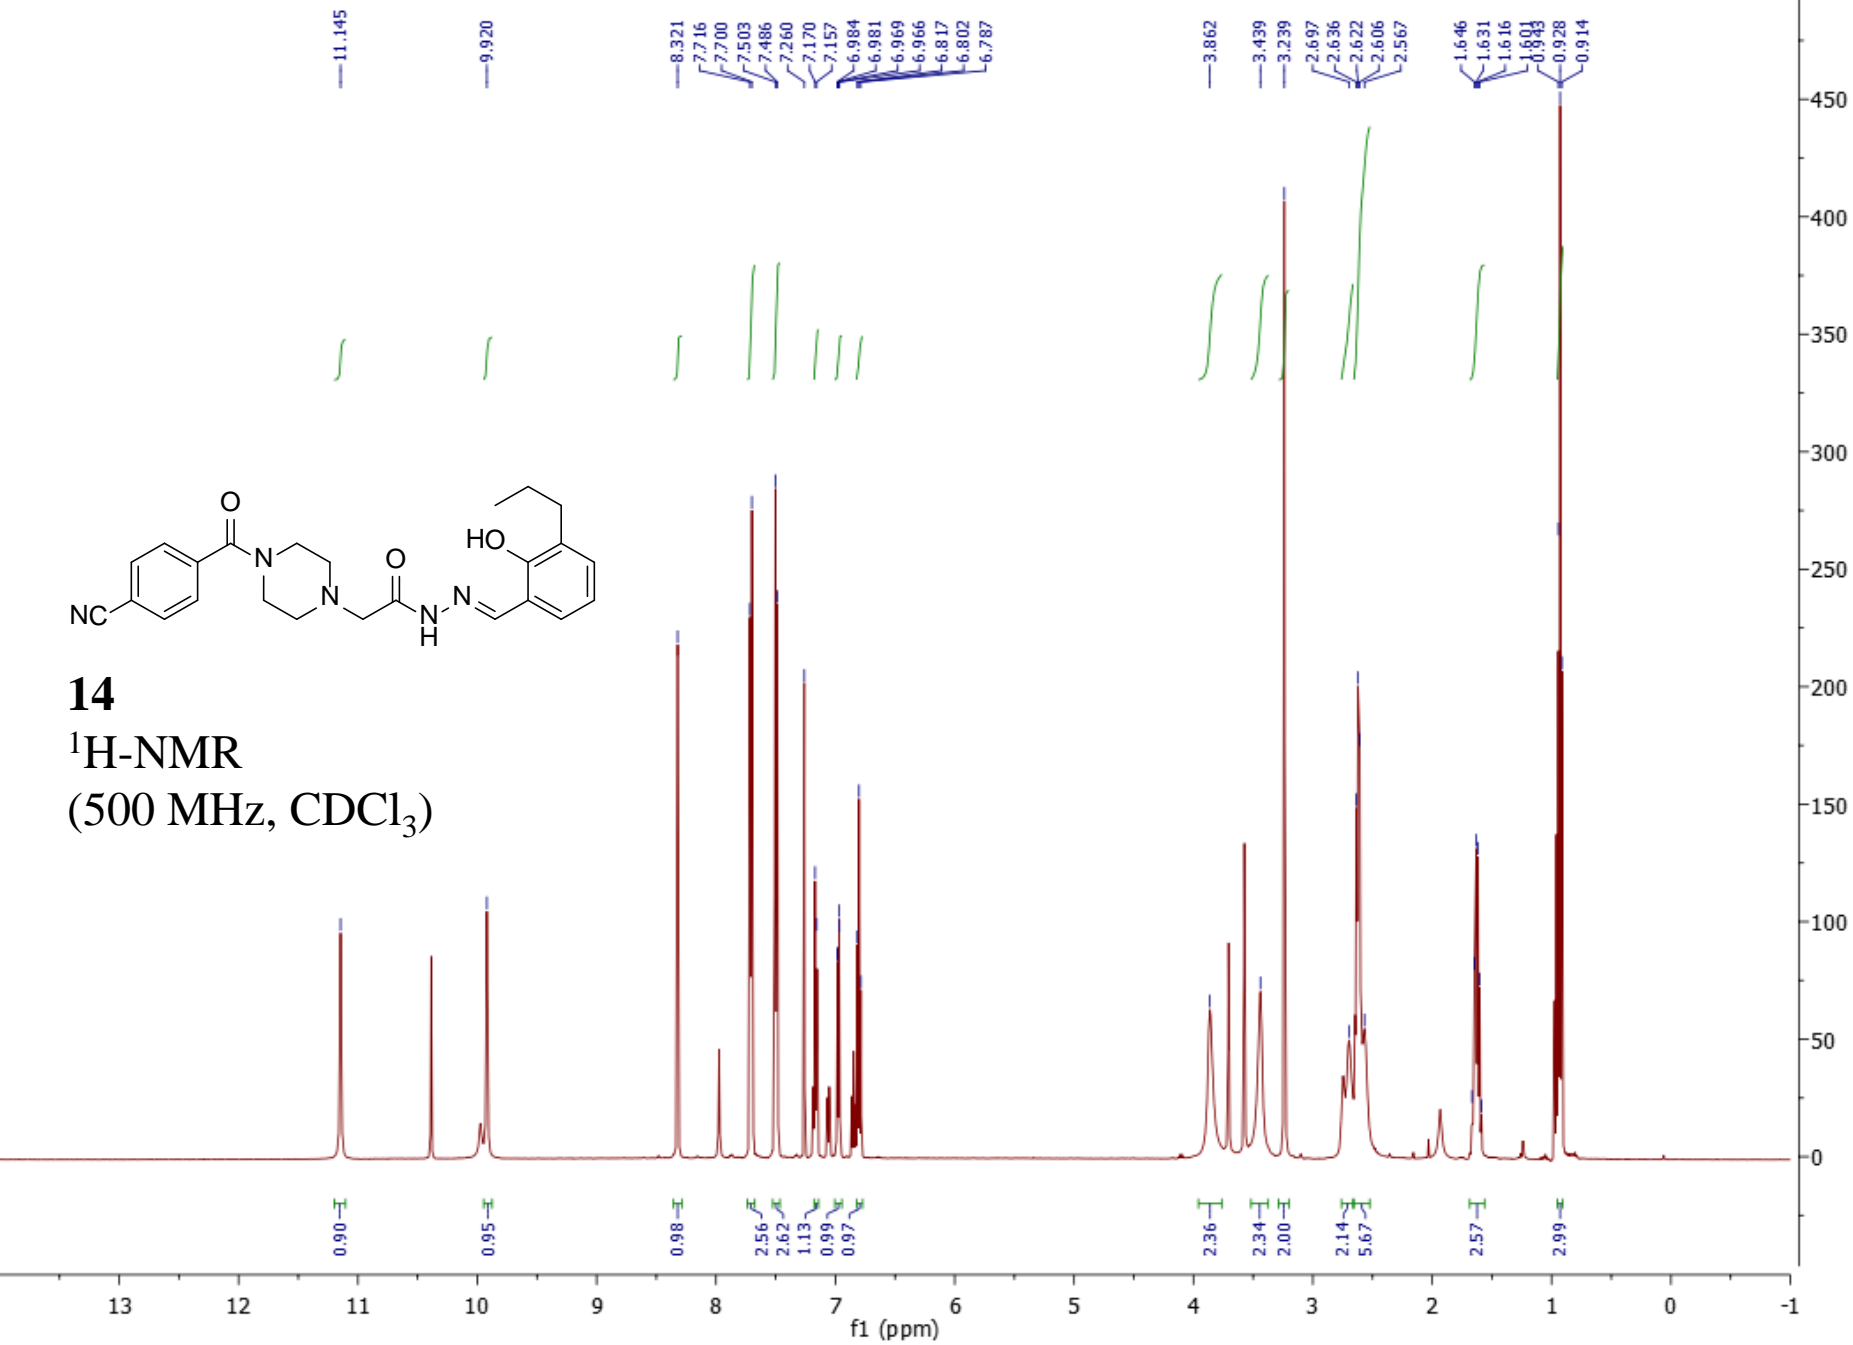



**14**  
 $^{13}\text{C}$ -NMR  
(125 MHz,  $\text{CDCl}_3$ )

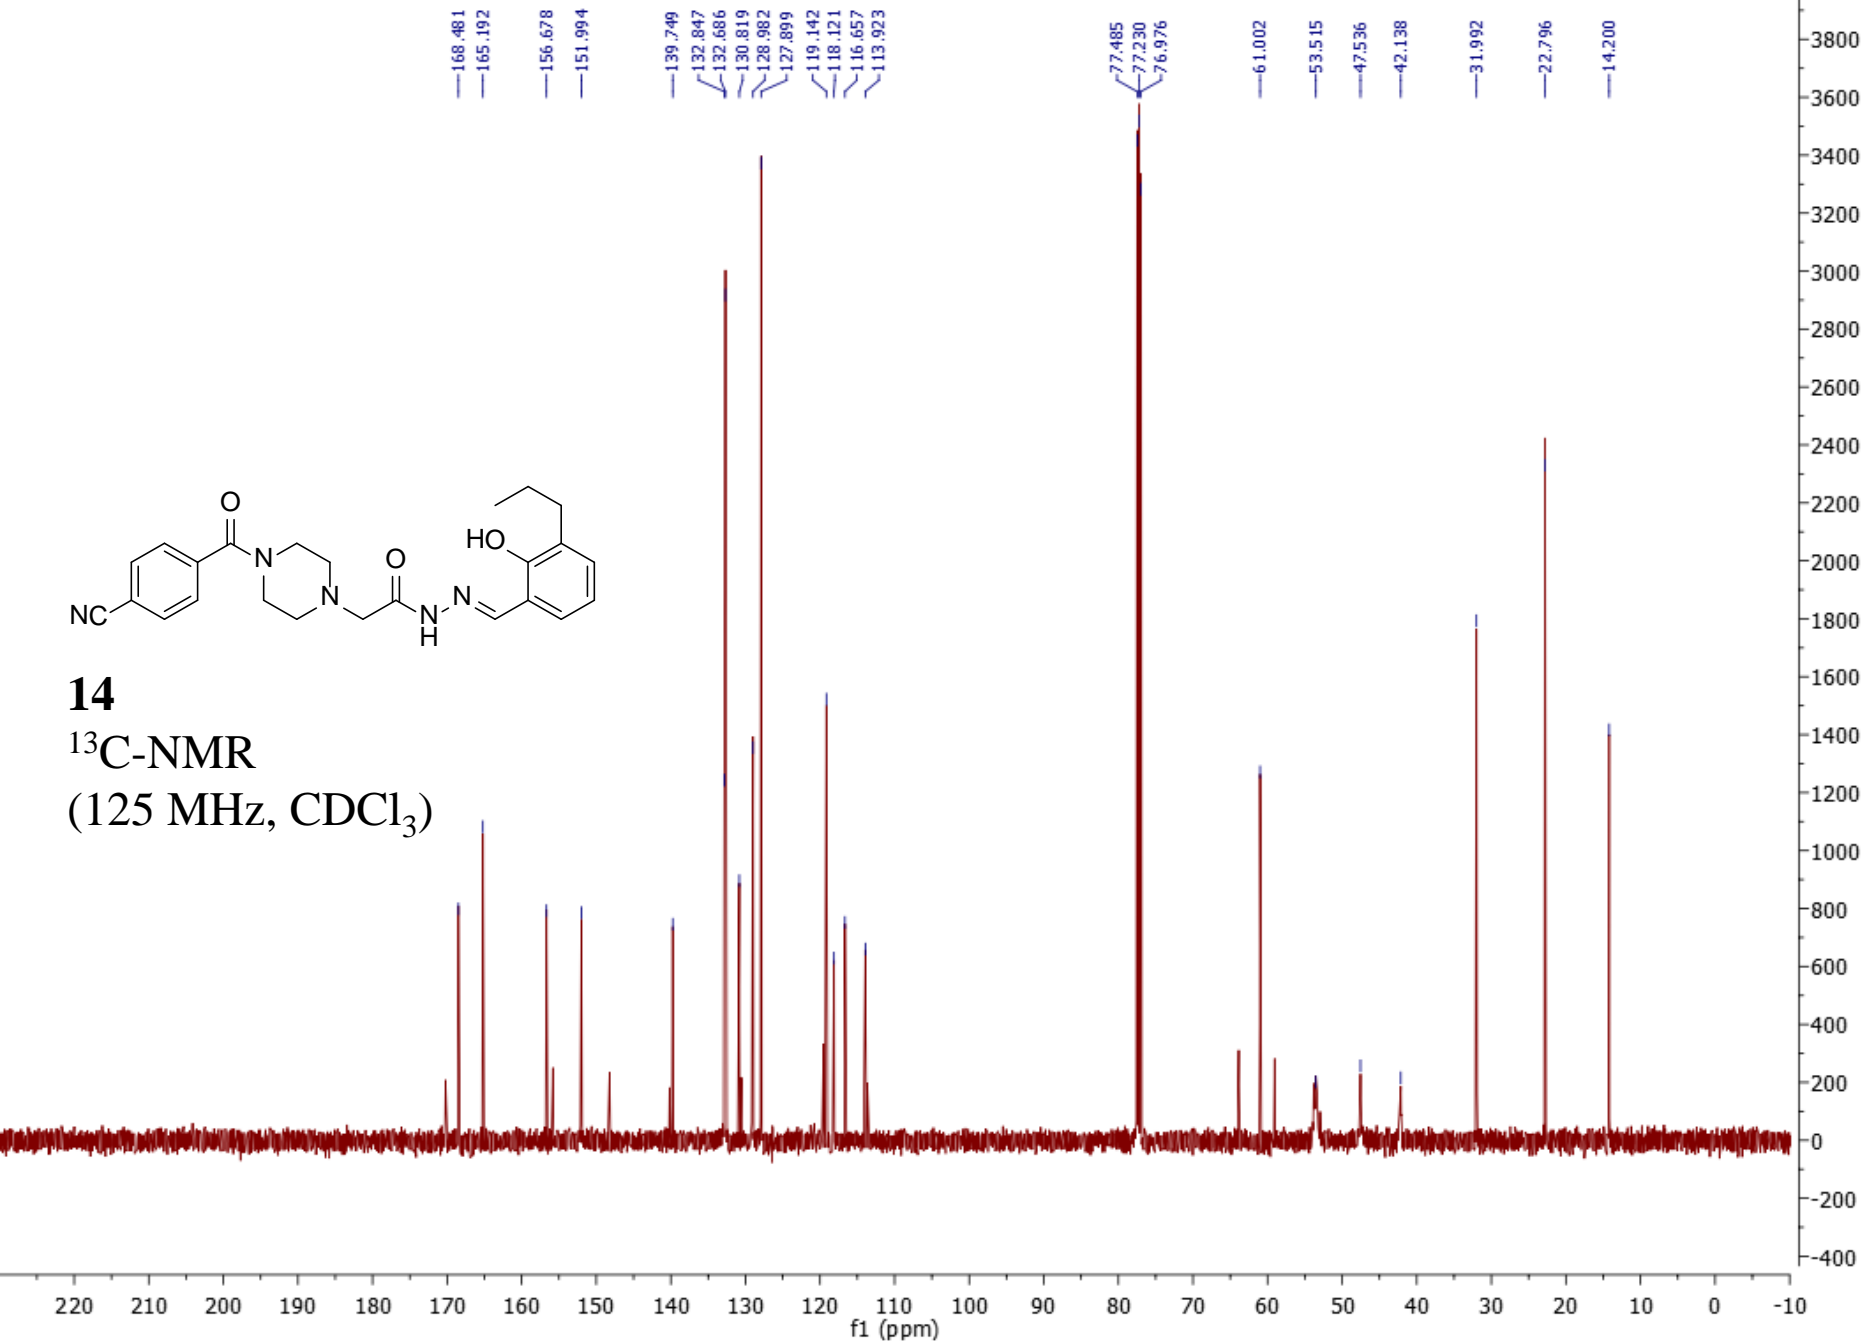

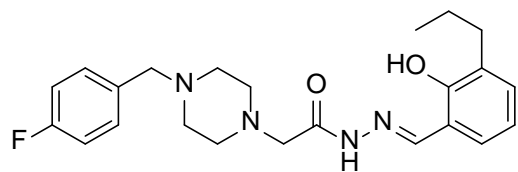

**15**  
 $^1\text{H-NMR}$   
 (500 MHz,  $\text{CDCl}_3$ )

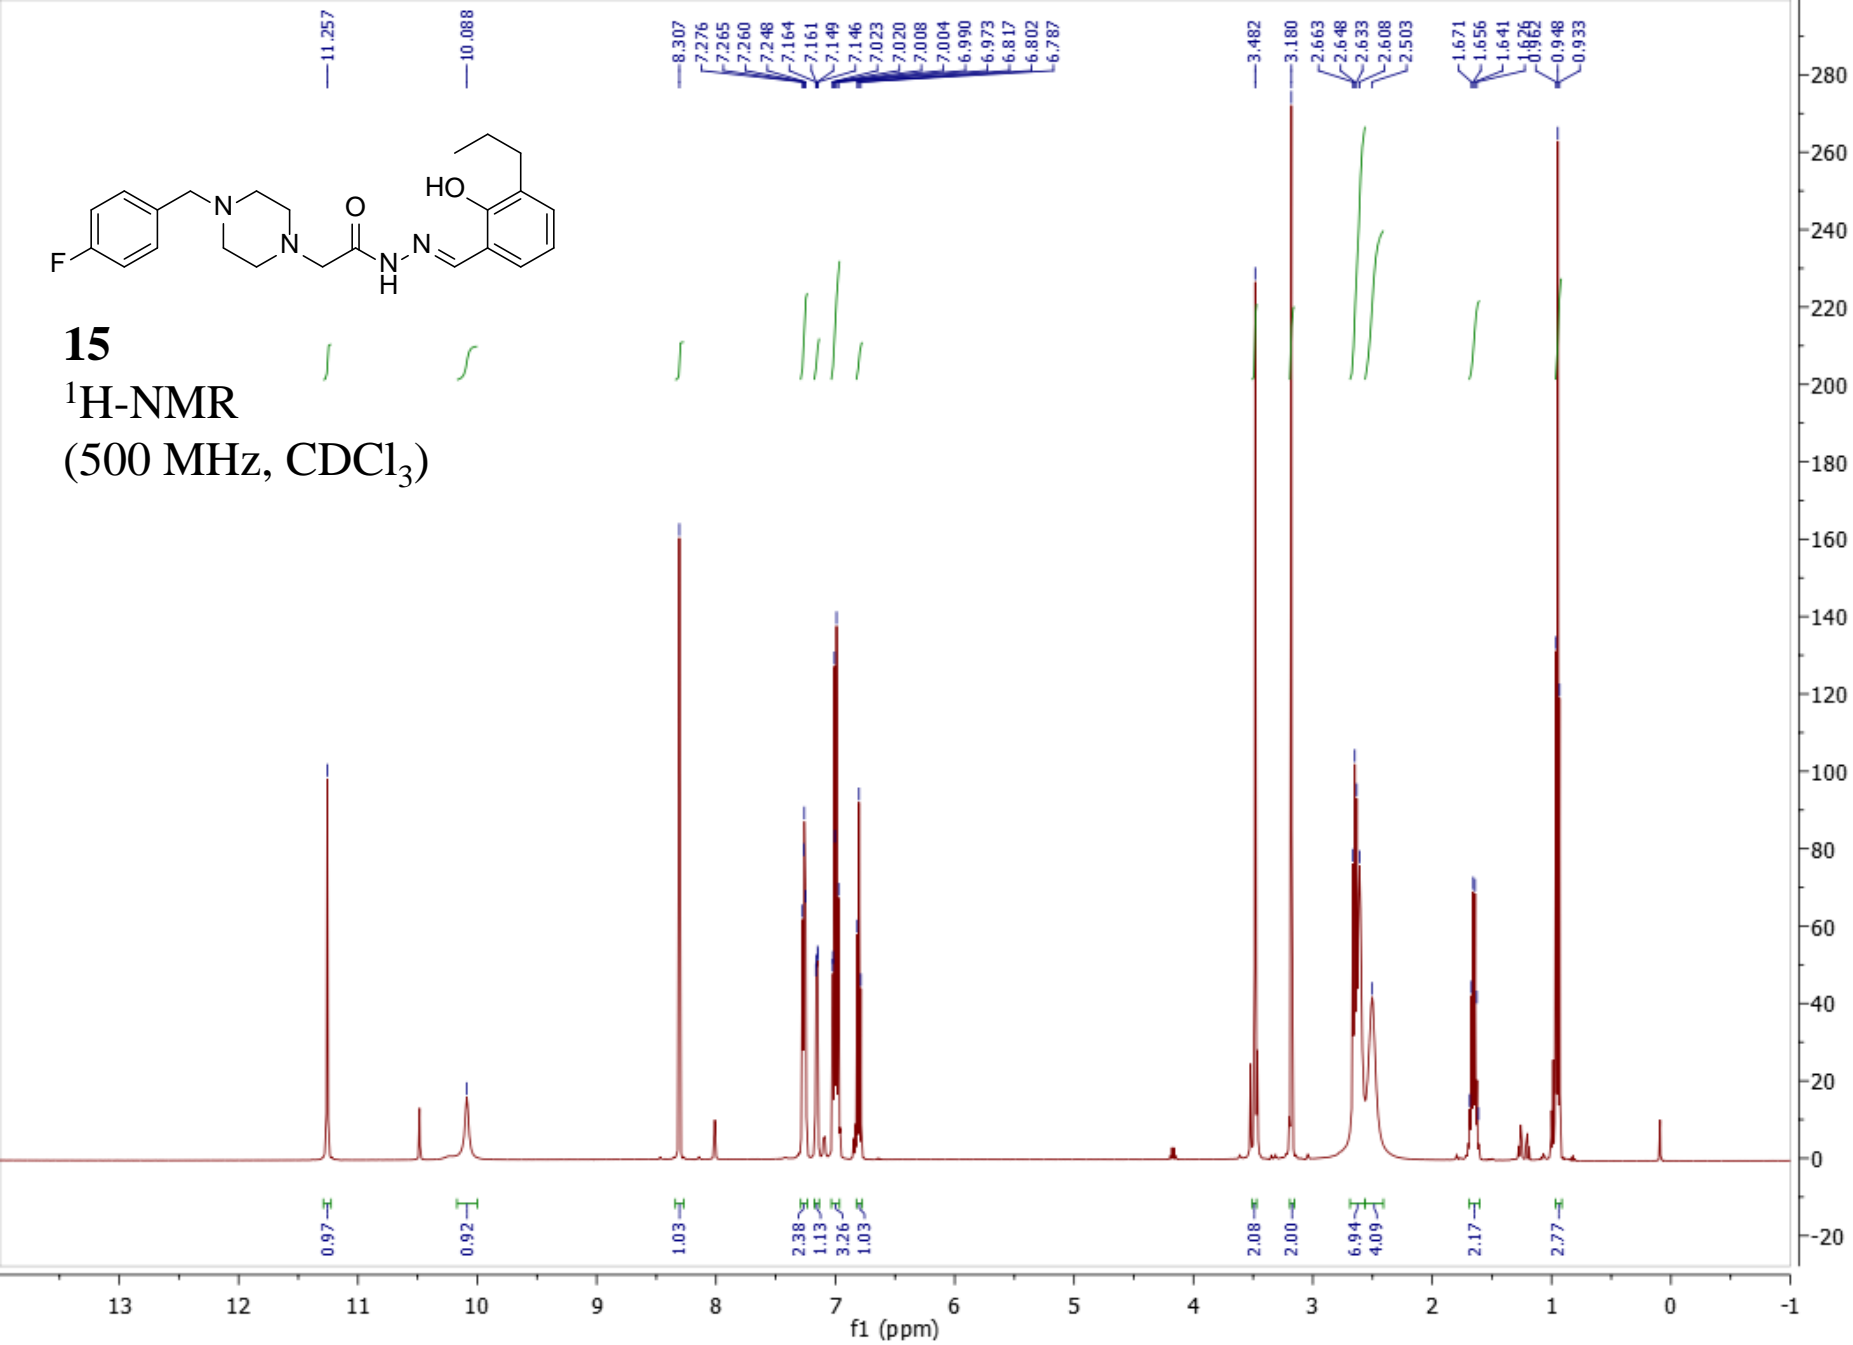

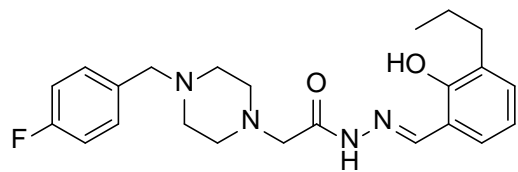

**15**

<sup>13</sup>C-NMR

(125 MHz, CDCl<sub>3</sub>)

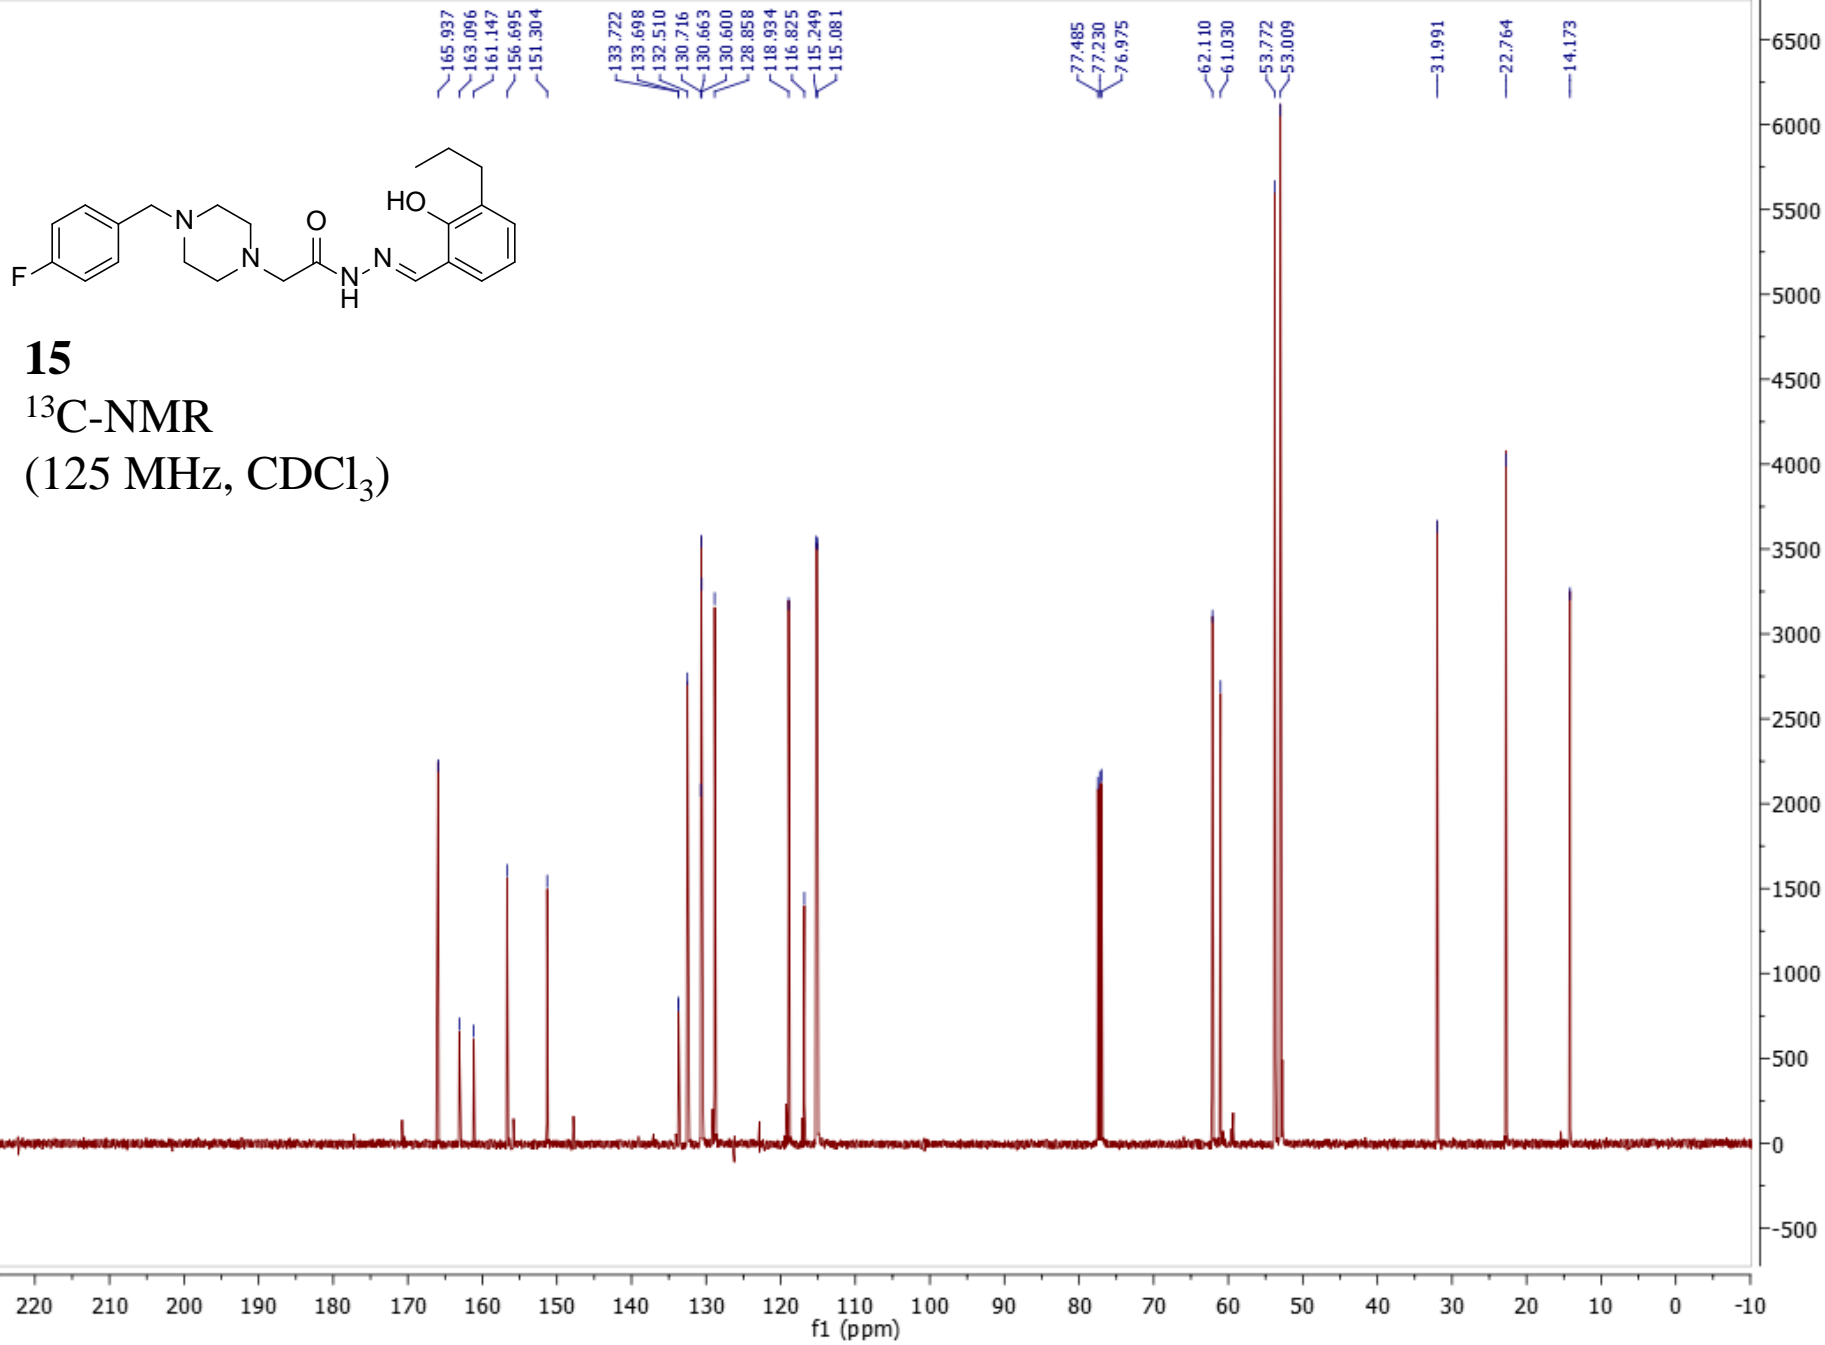

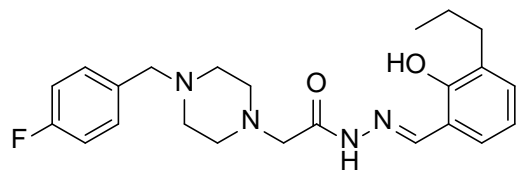

**15**

$^{19}\text{F}$ -NMR

(470 MHz,  $\text{CDCl}_3$ )

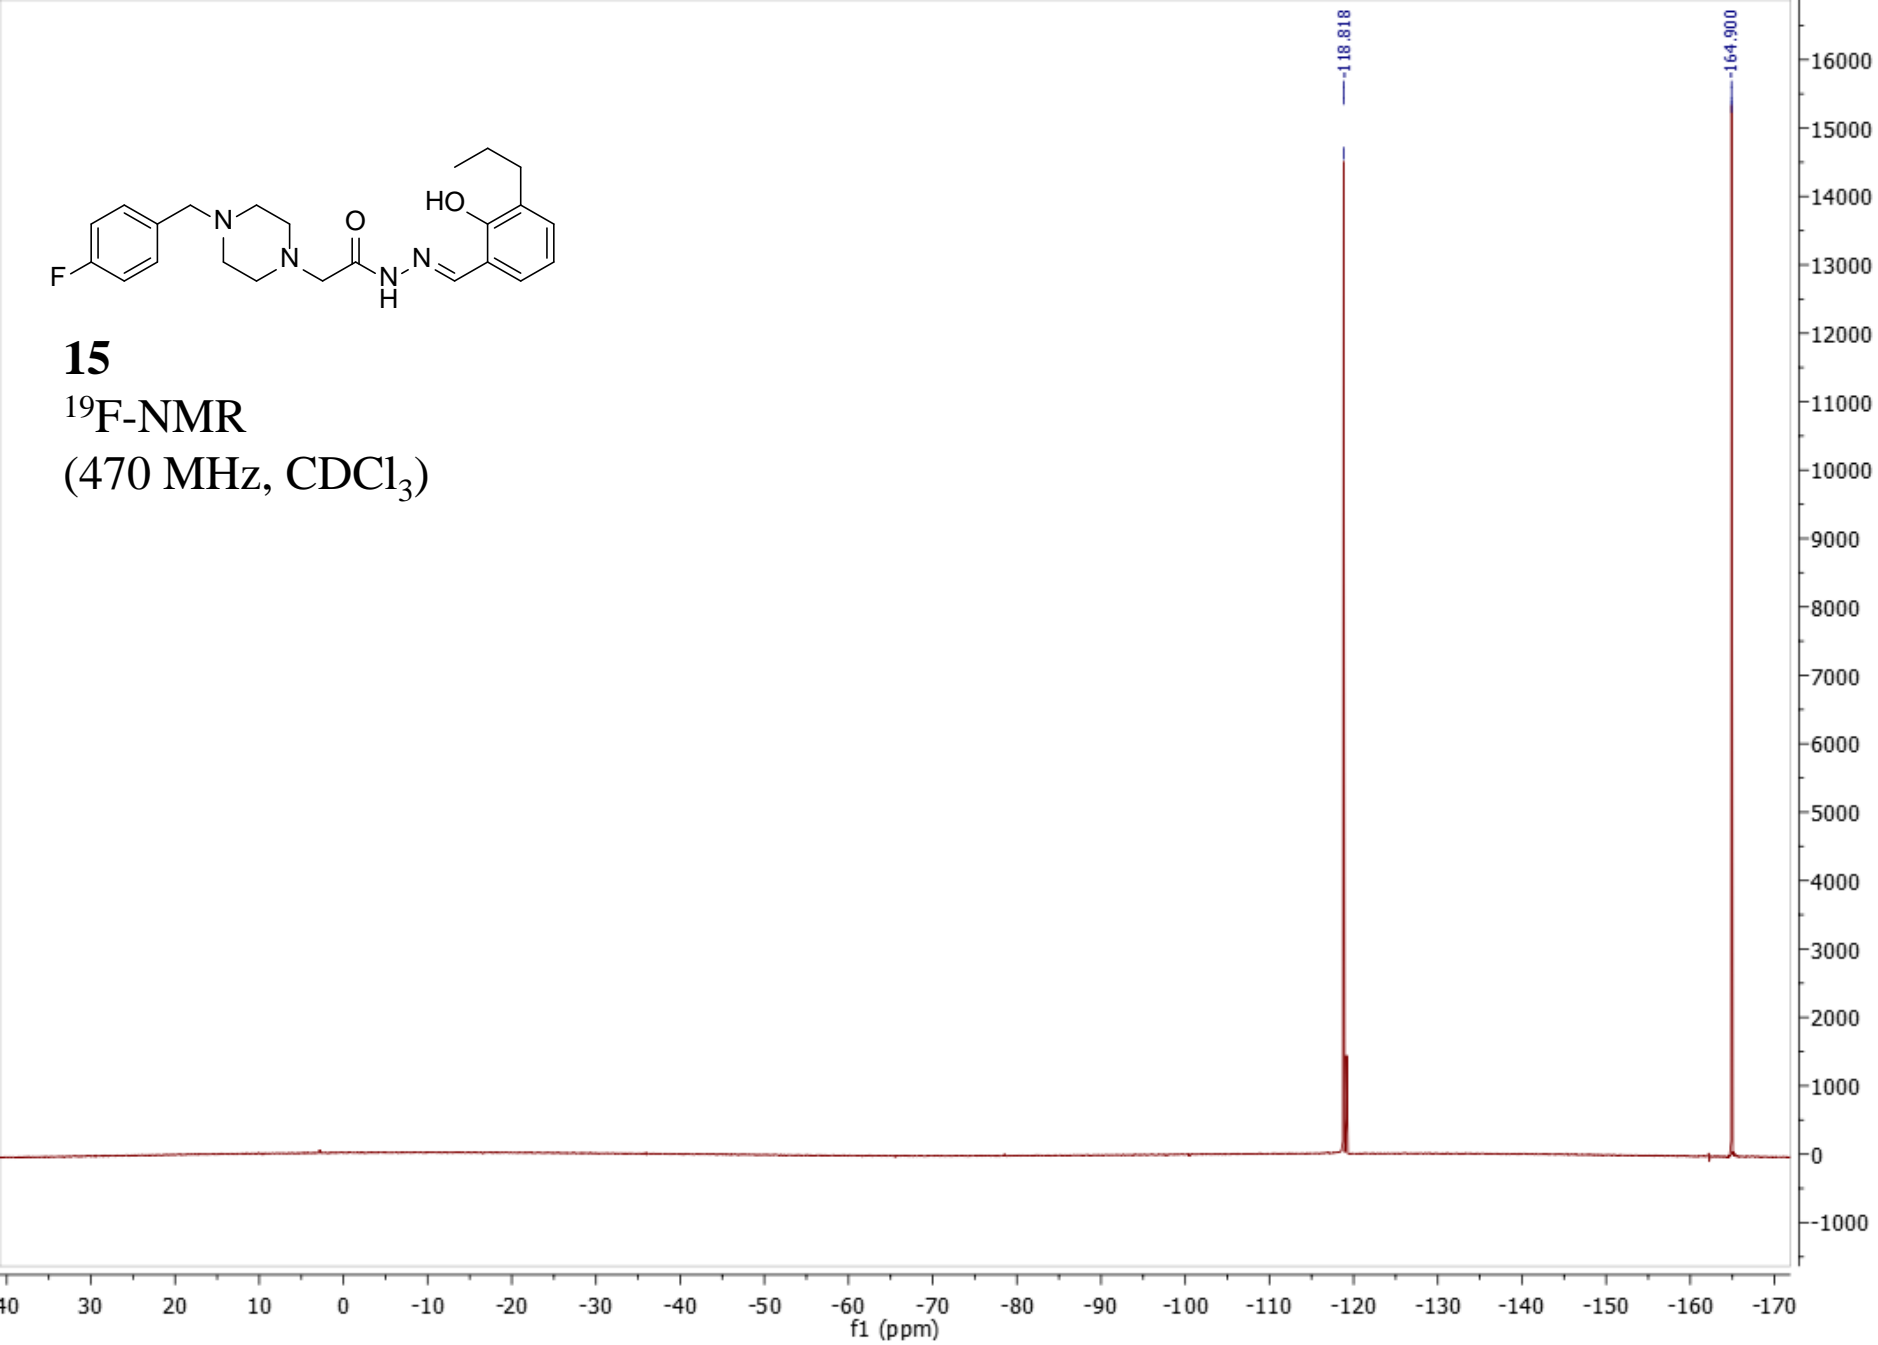

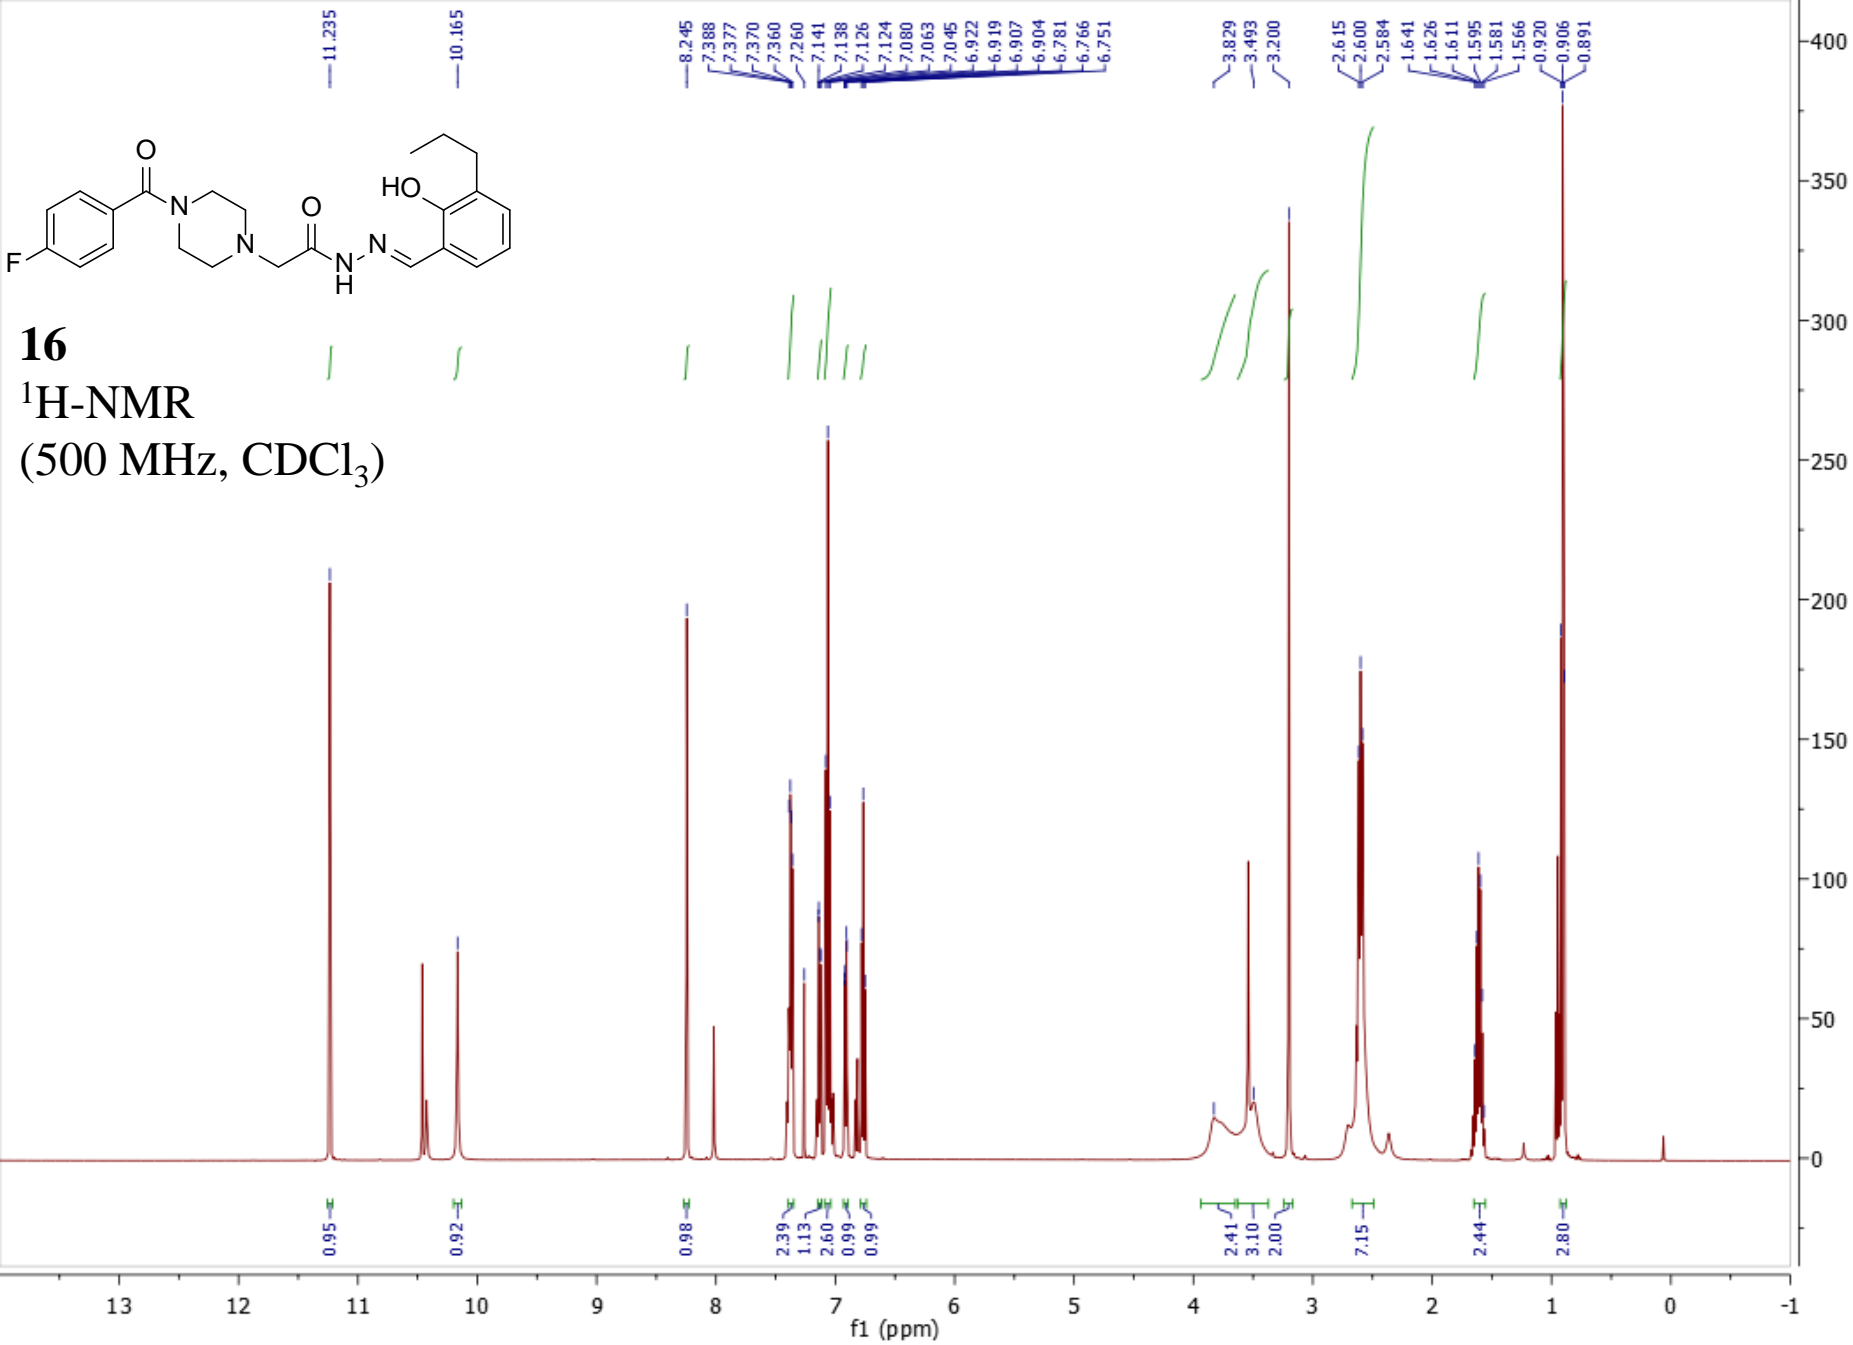

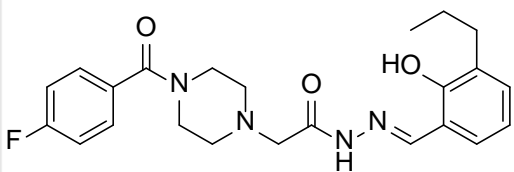

**16**  
 $^{13}\text{C}$ -NMR  
(125 MHz,  $\text{CDCl}_3$ )

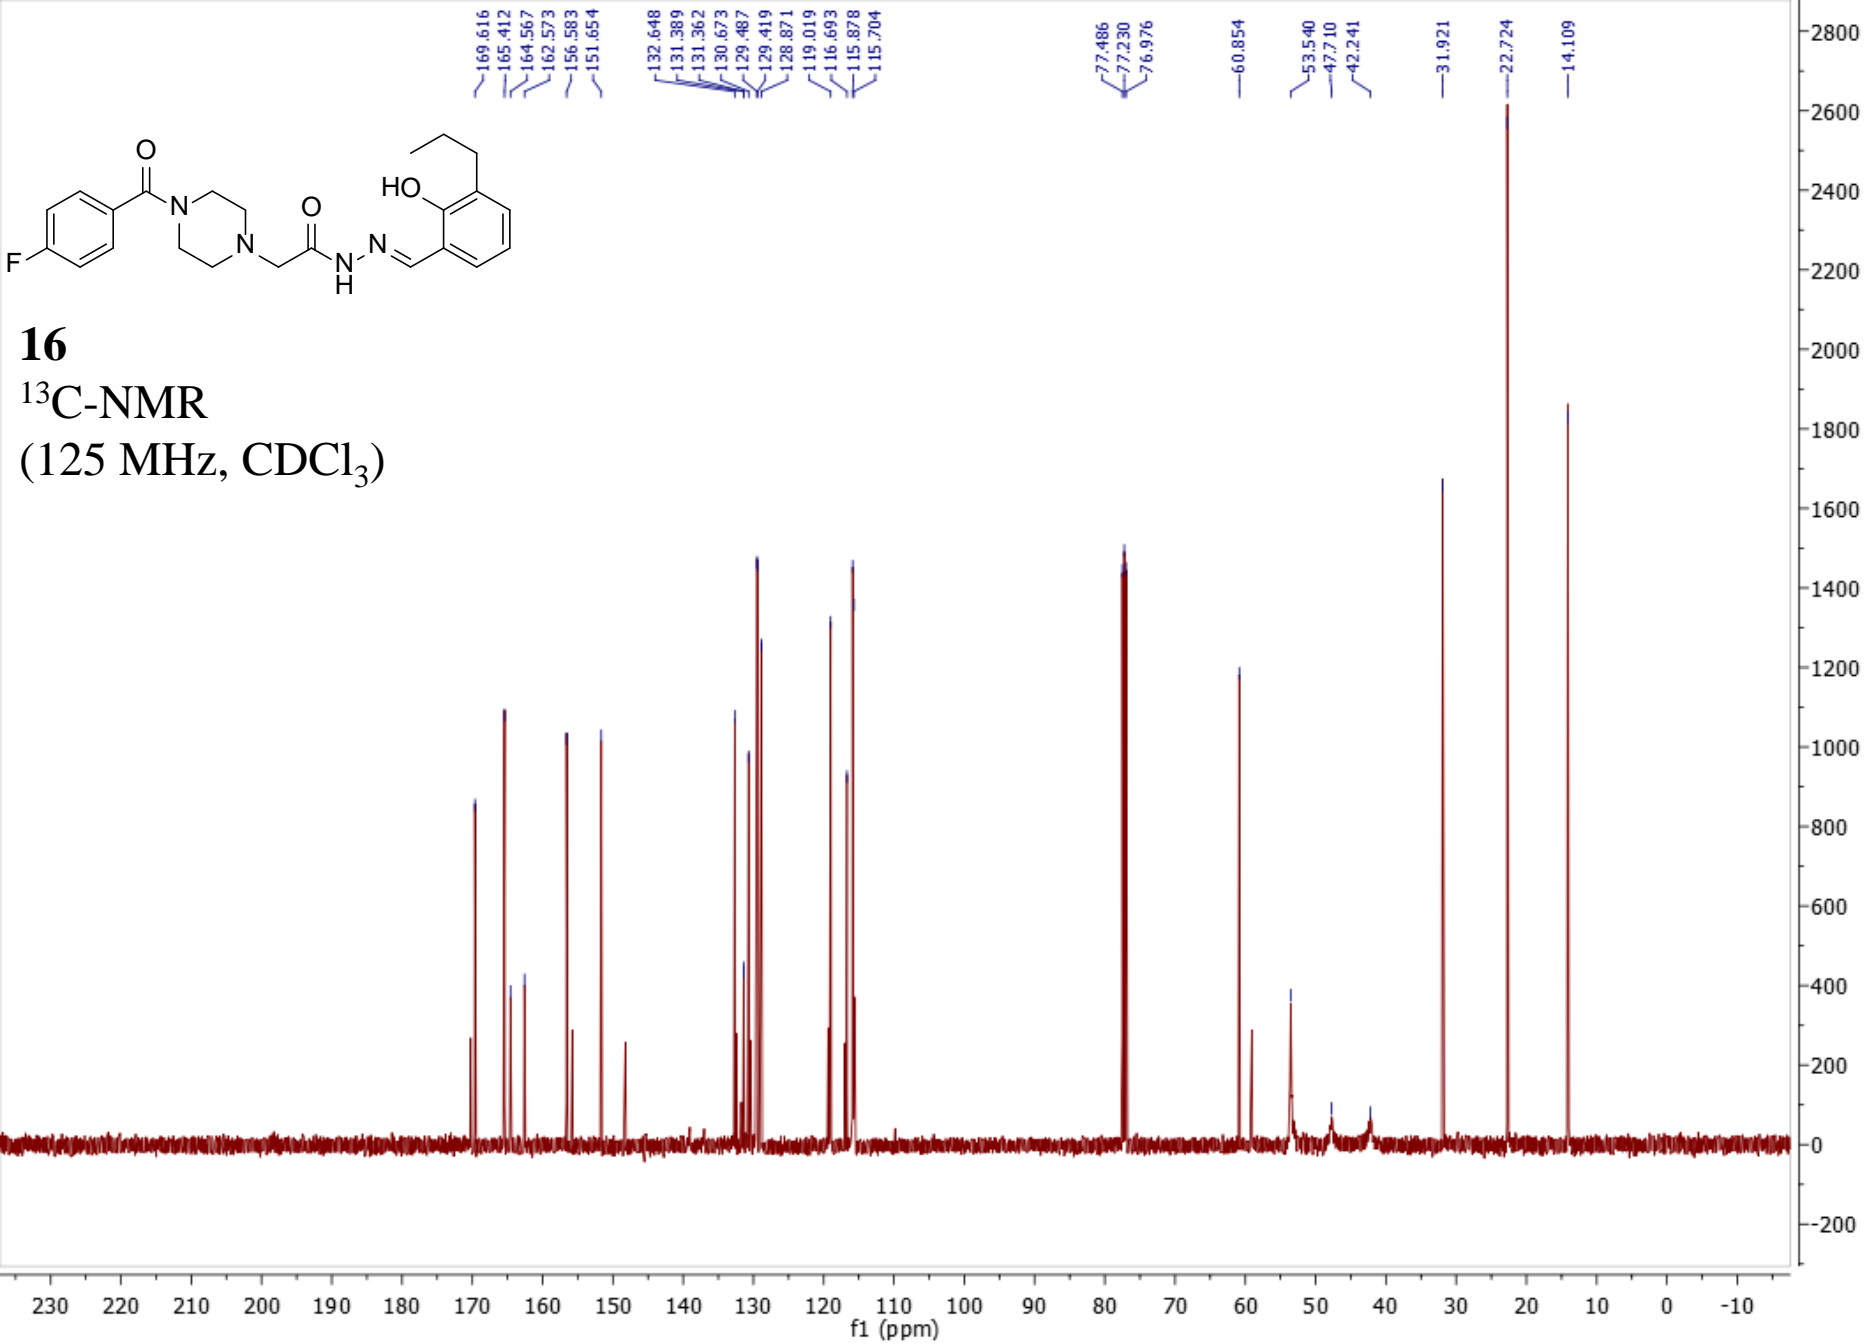



**16**

<sup>19</sup>F-NMR

(470 MHz, CDCl<sub>3</sub>)

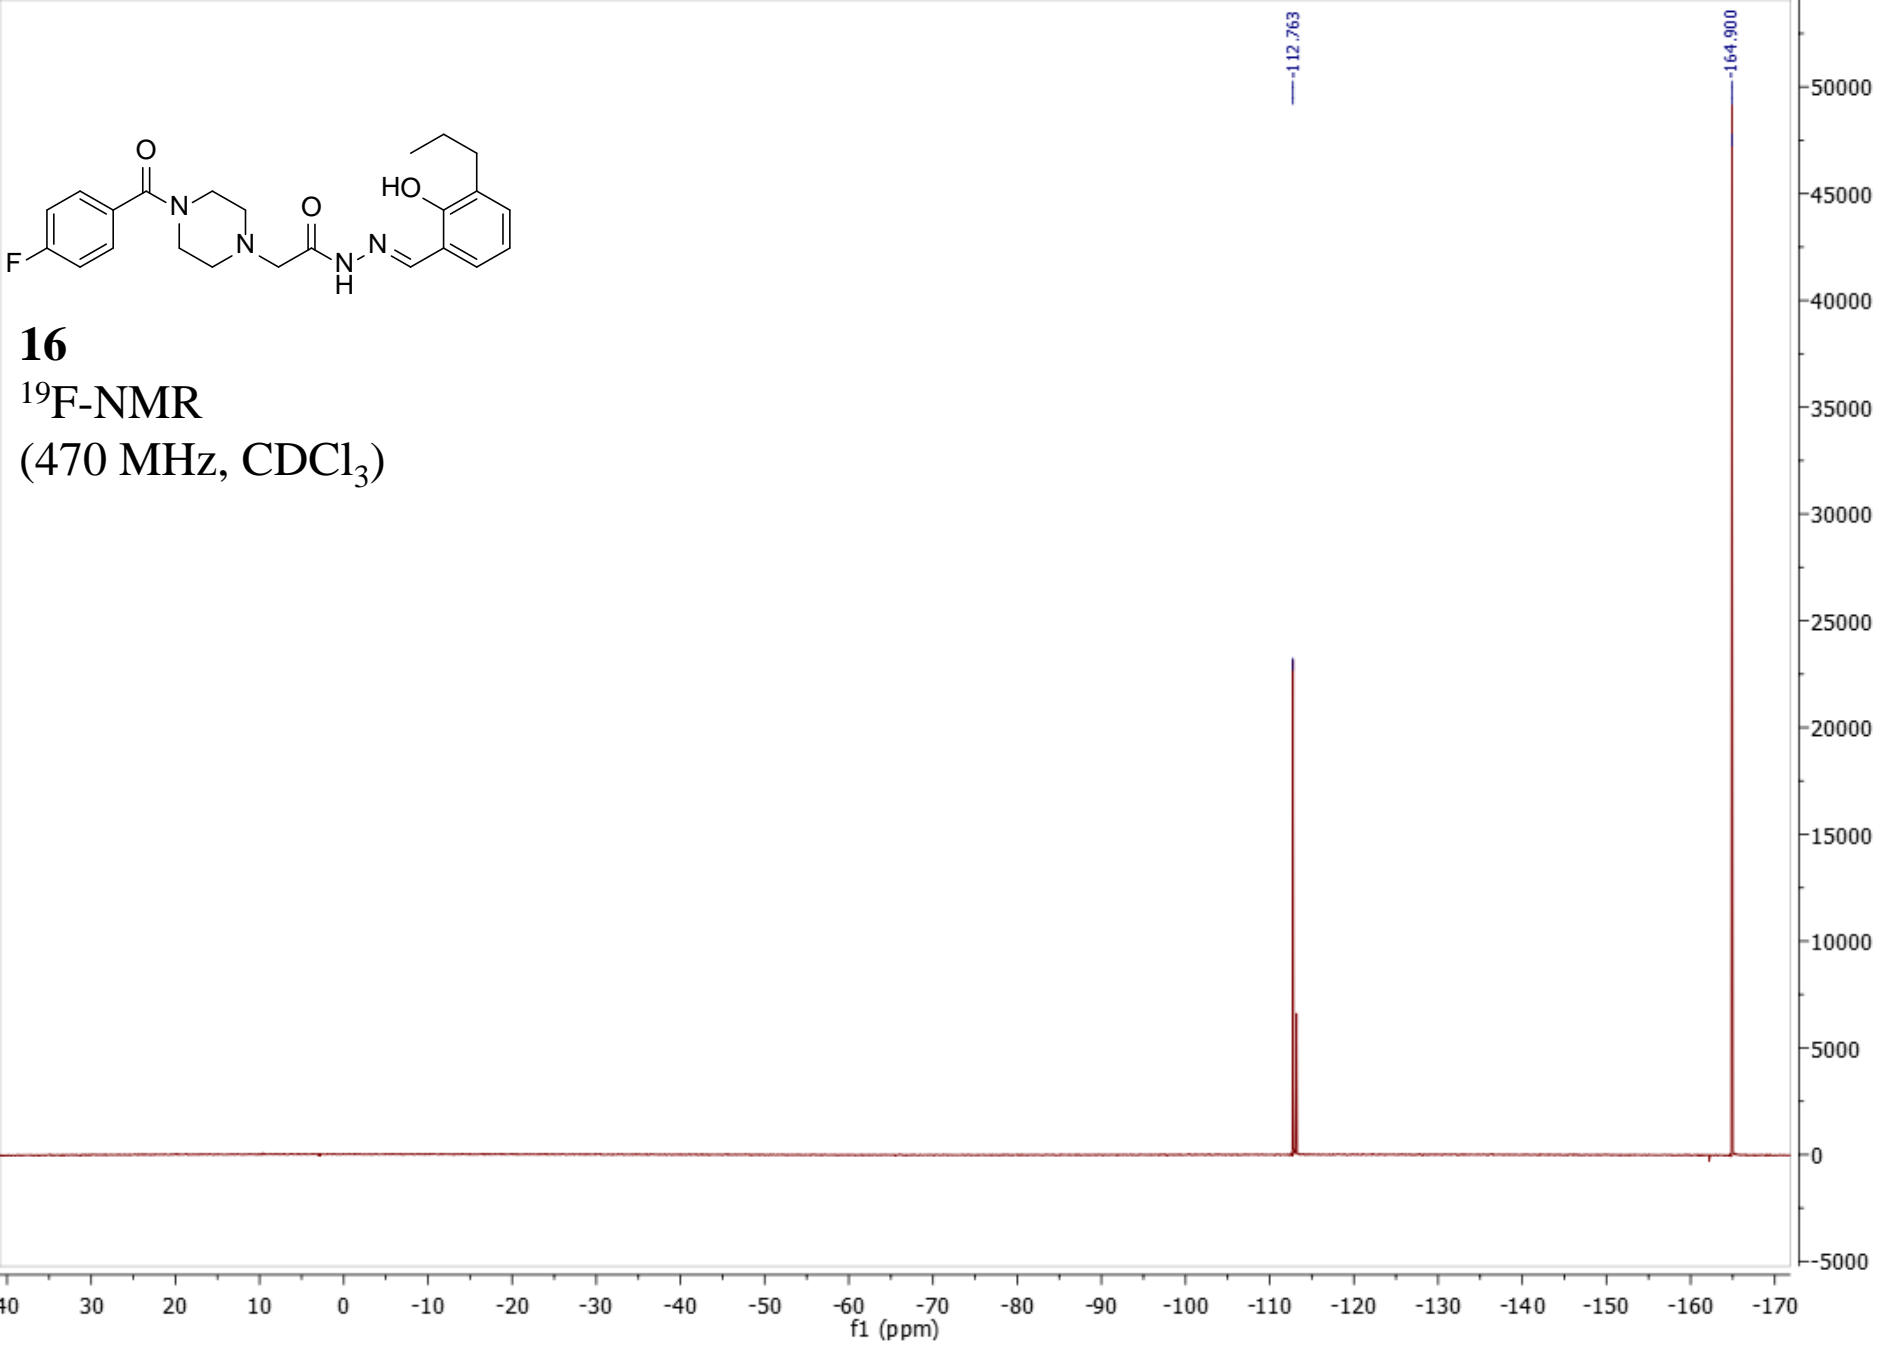



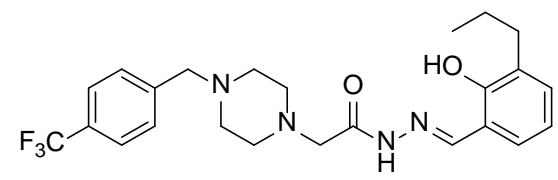

**17**  
<sup>1</sup>H-NMR  
 (500 MHz, CDCl<sub>3</sub>)

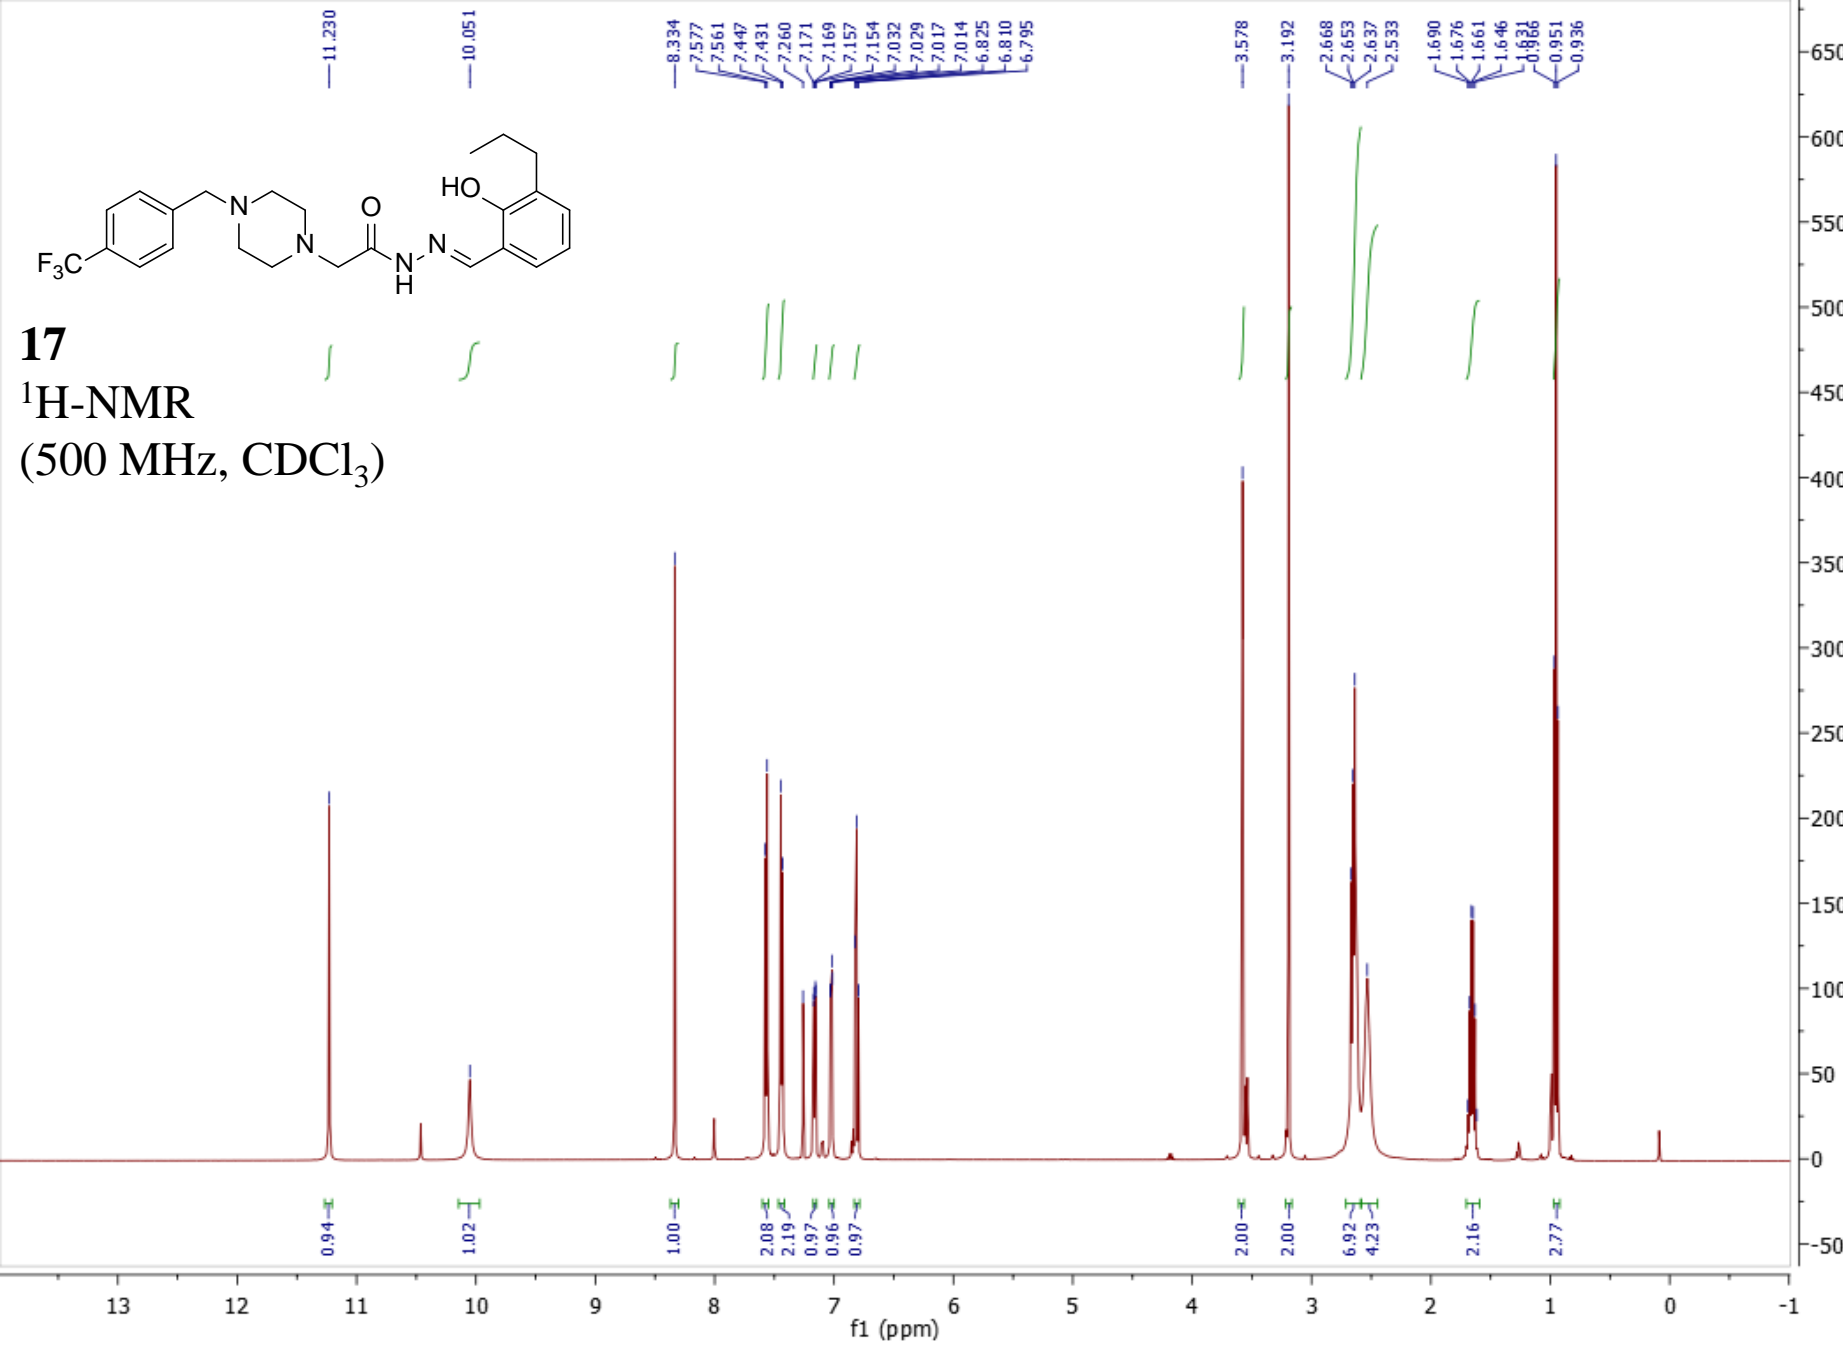

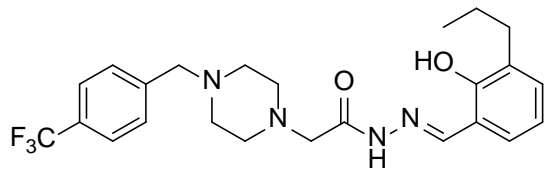

**17**  
 $^{13}\text{C}$ -NMR  
 (125 MHz,  $\text{CDCl}_3$ )

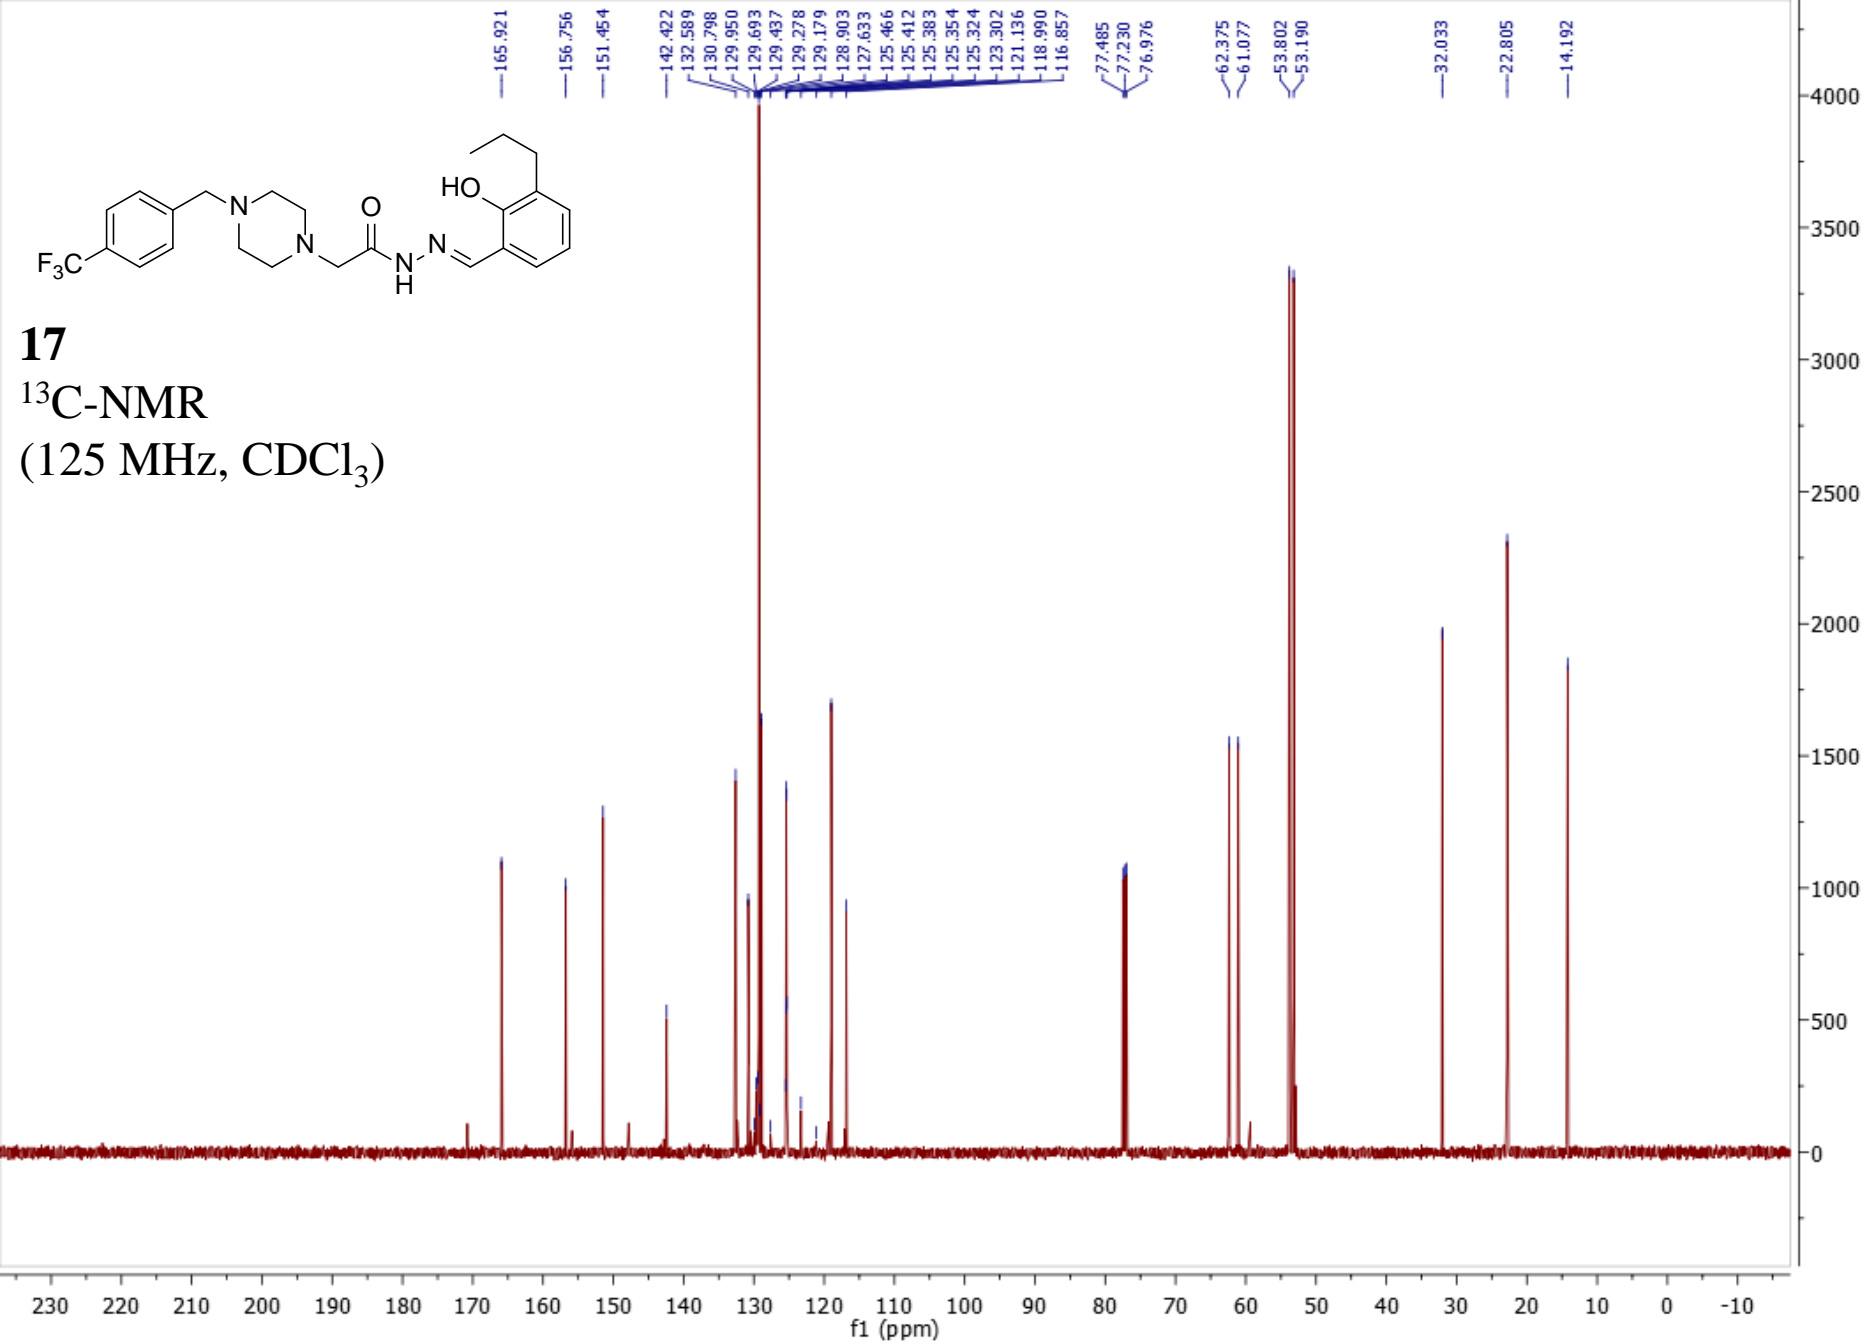

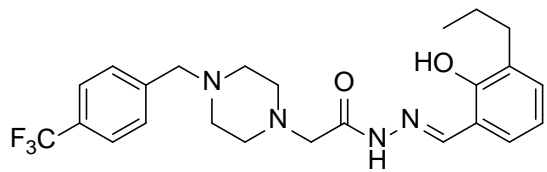

**17**

$^{19}\text{F}$ -NMR

(470 MHz,  $\text{CDCl}_3$ )

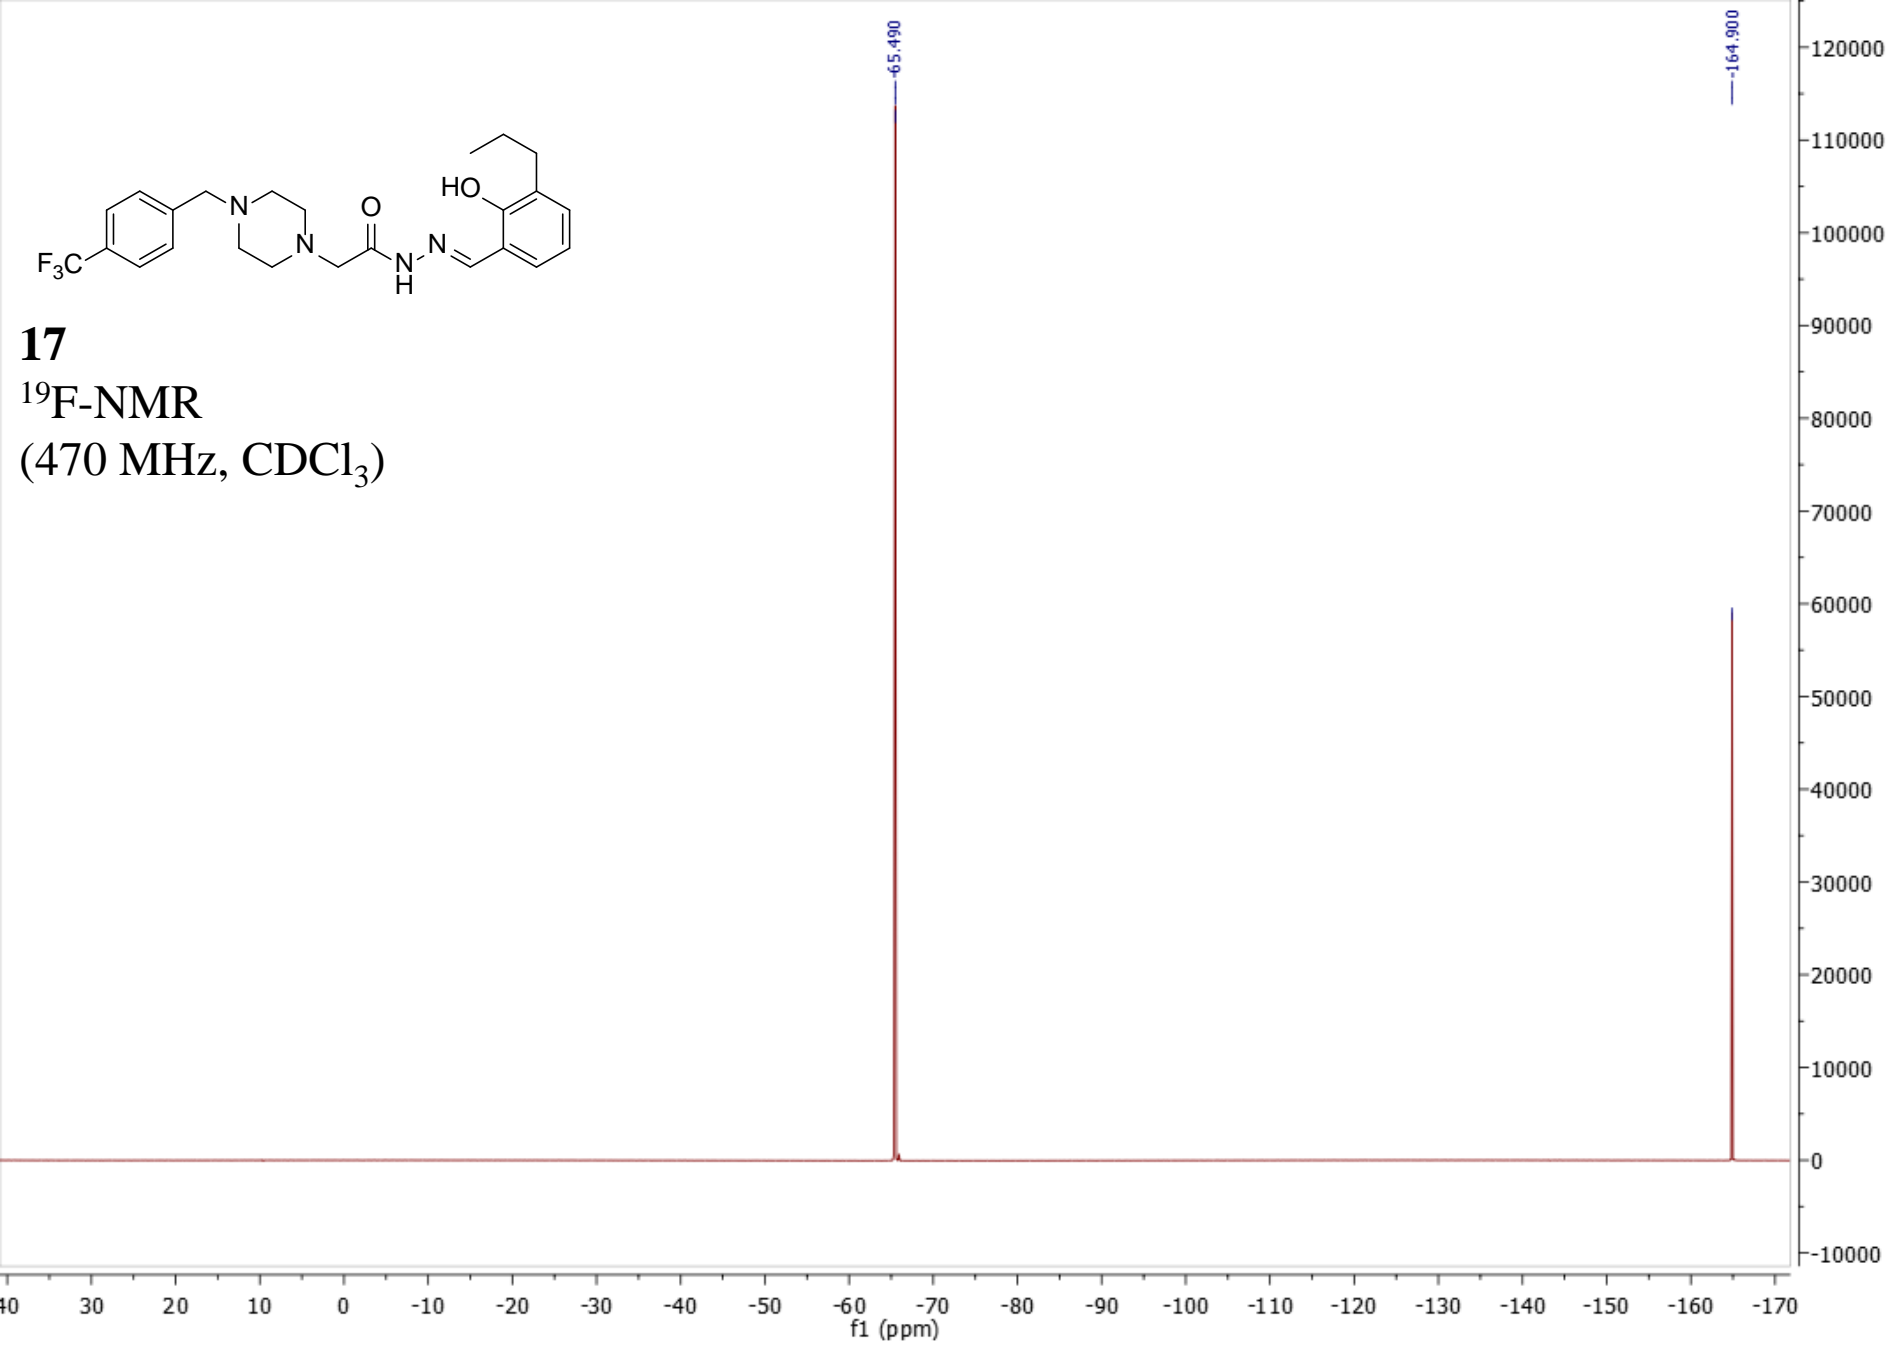

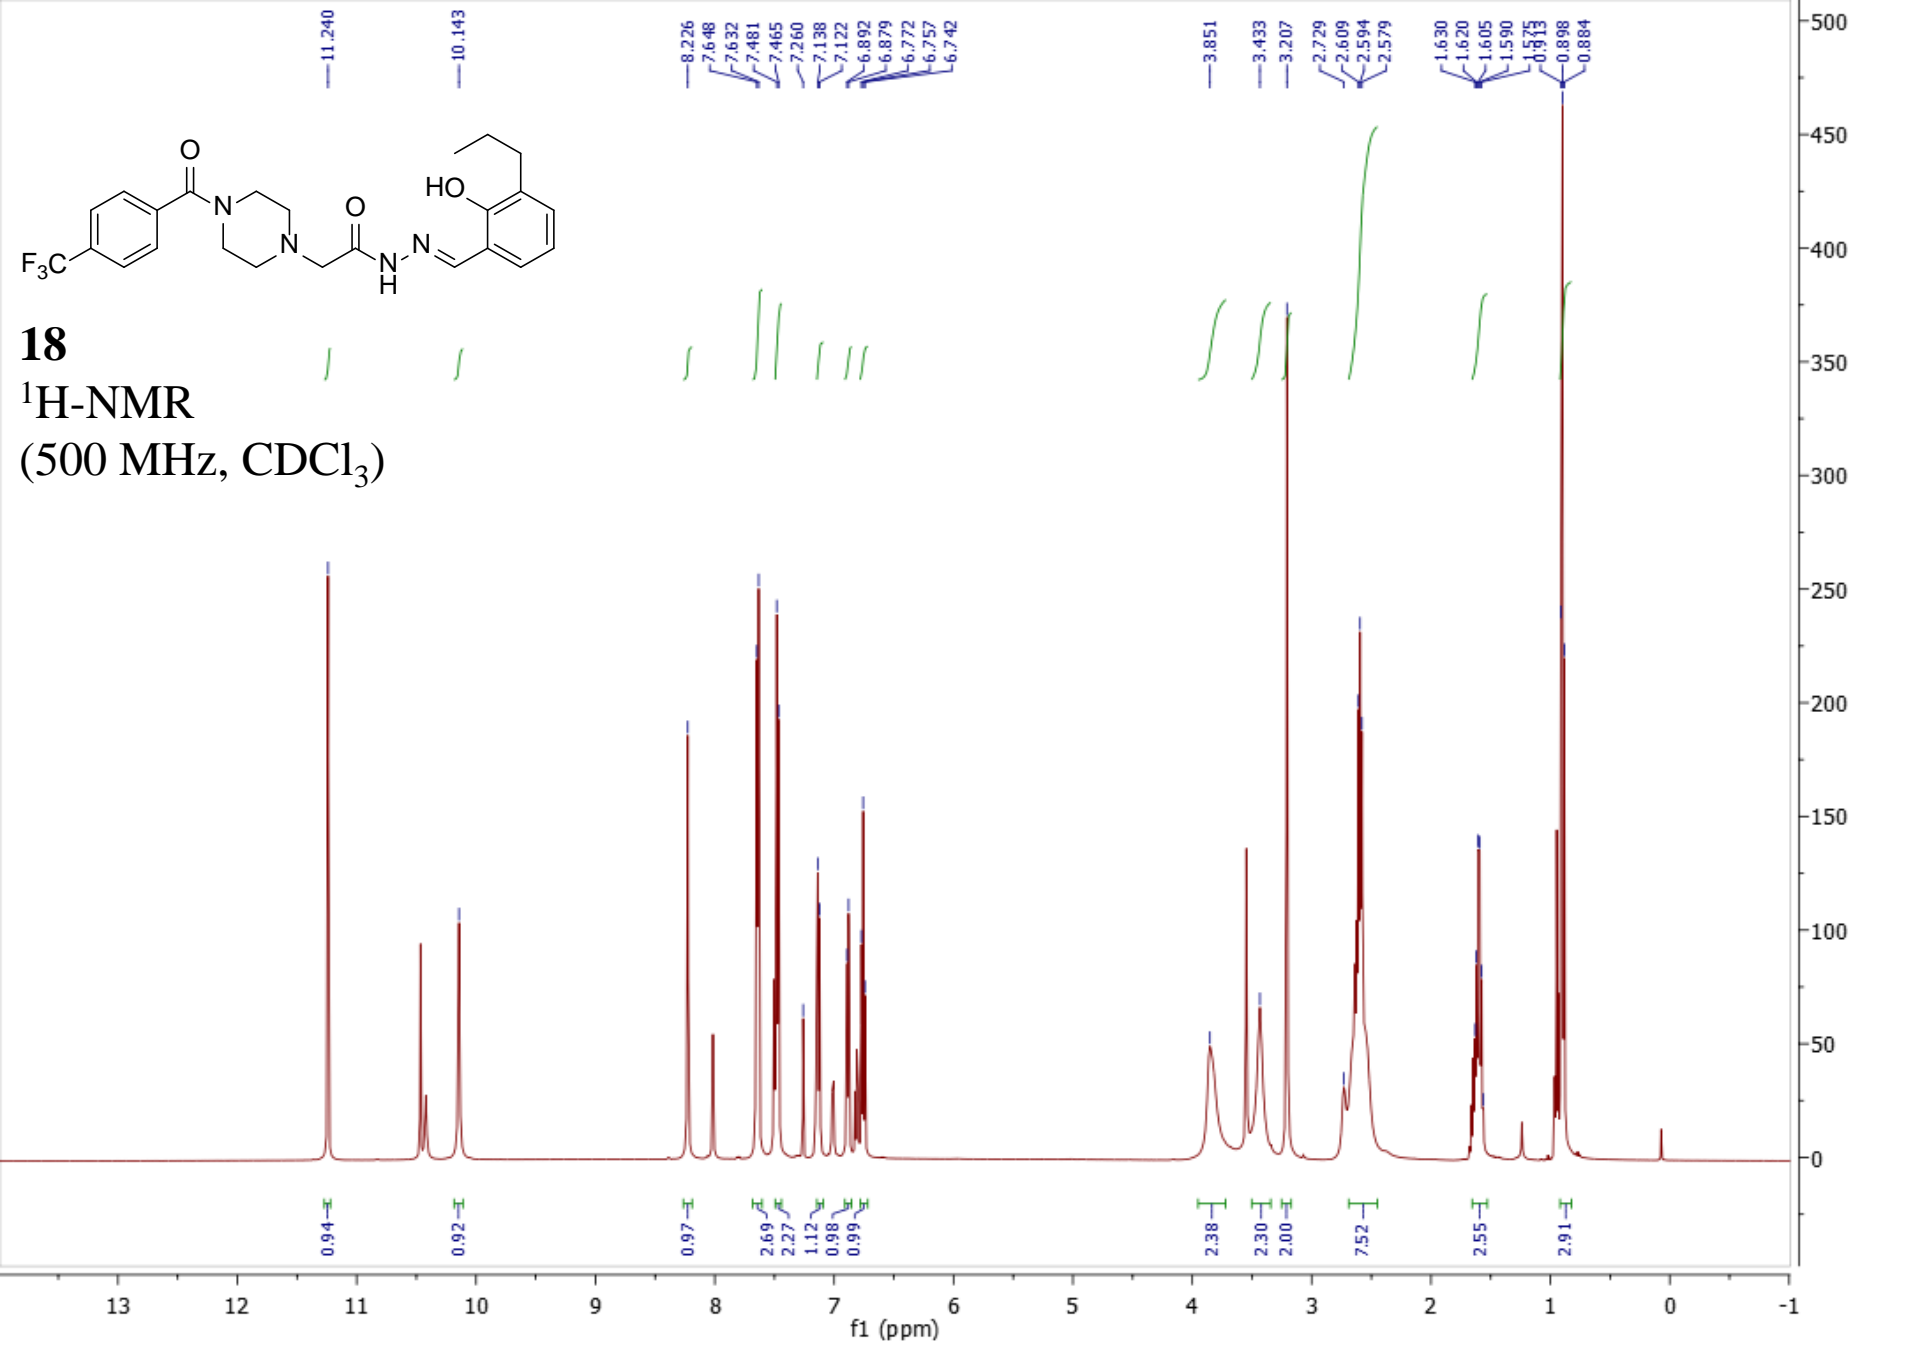

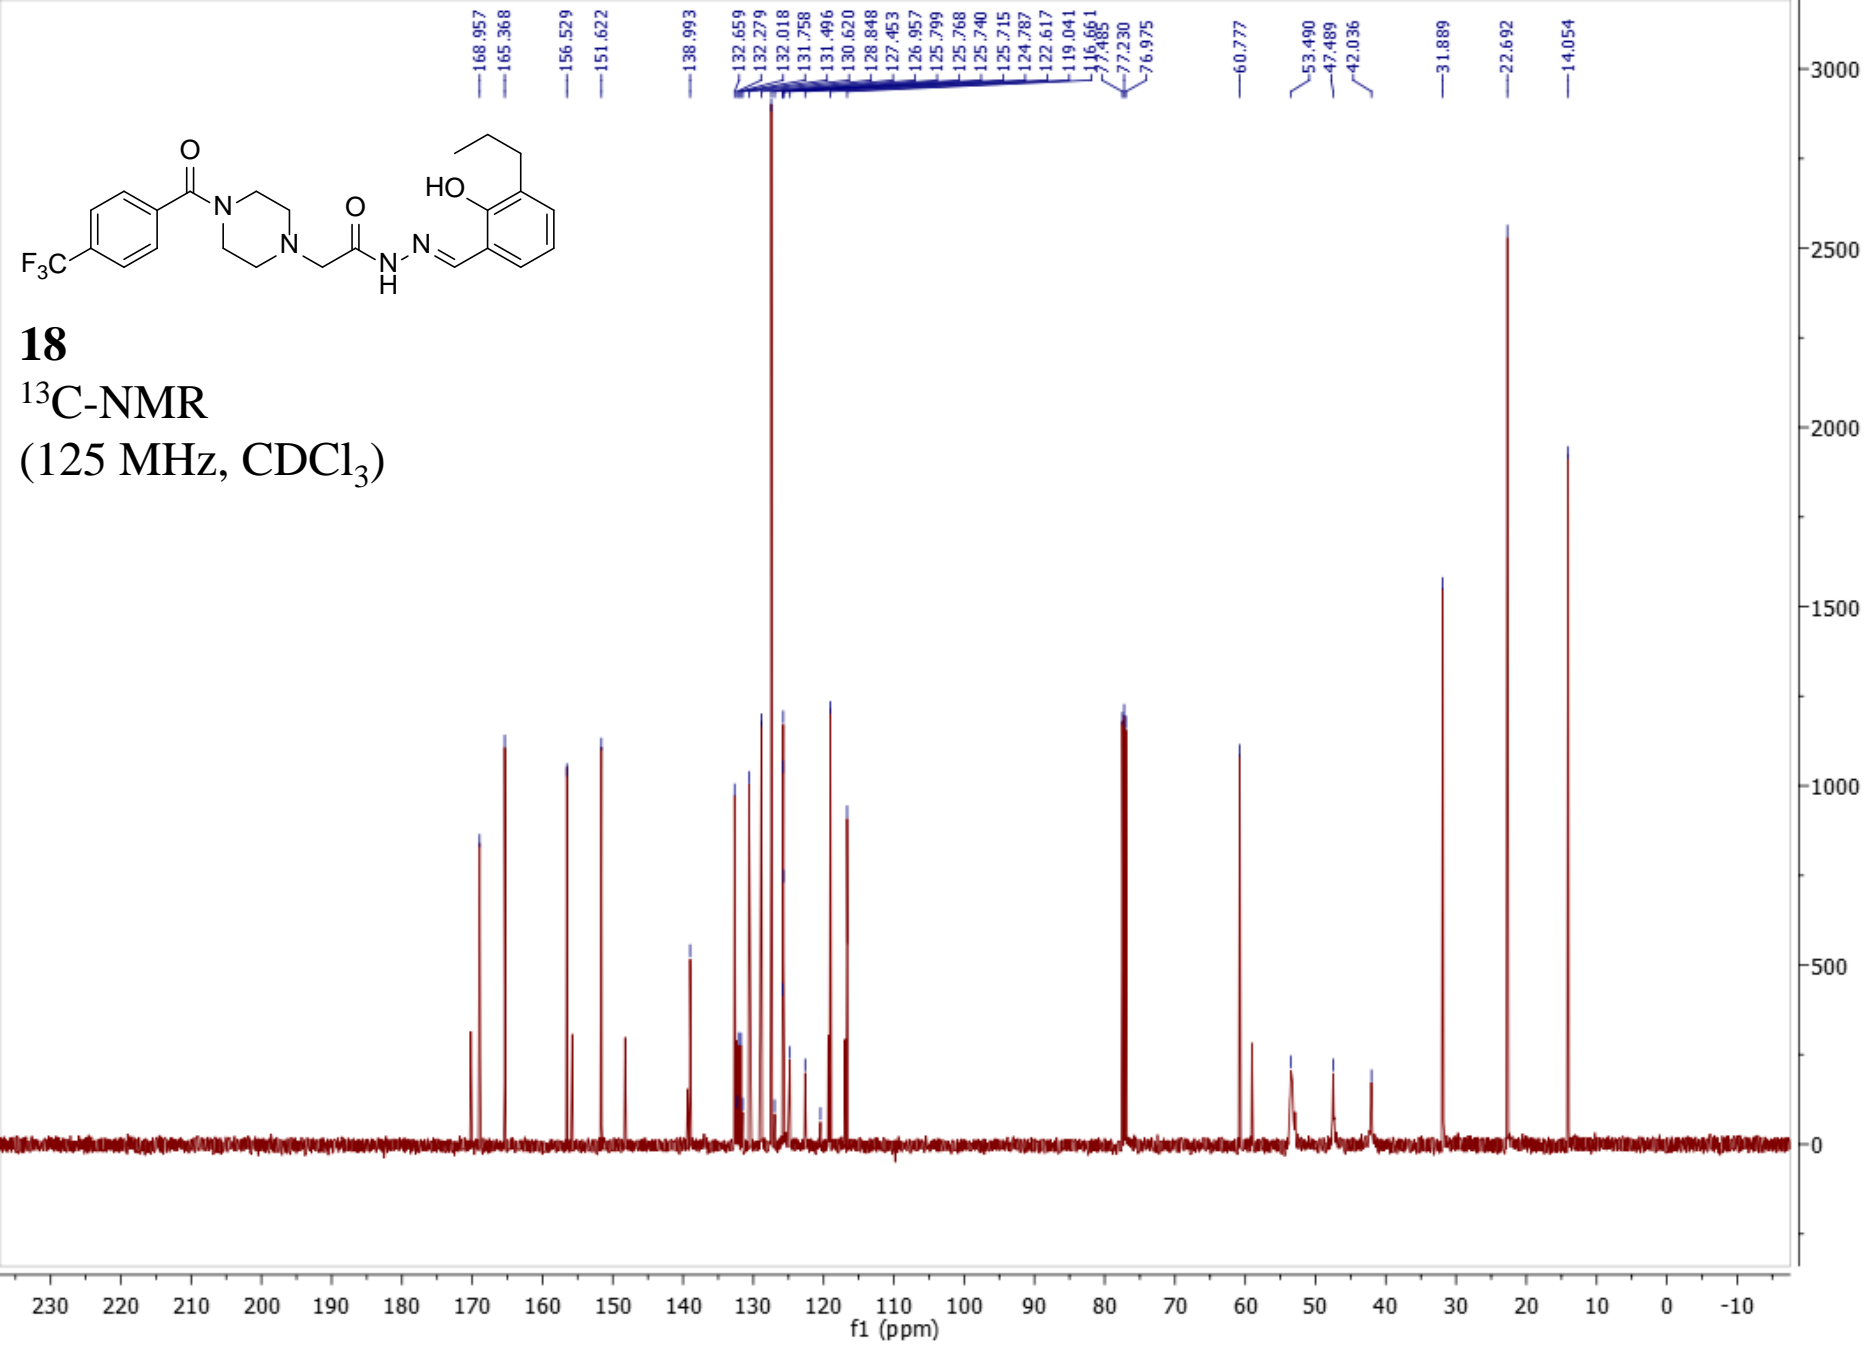

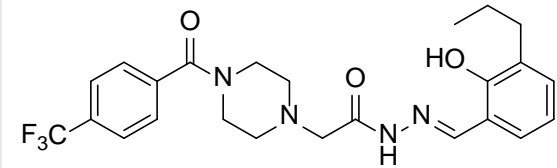

**18**

$^{19}\text{F}$ -NMR  
(470 MHz,  $\text{CDCl}_3$ )

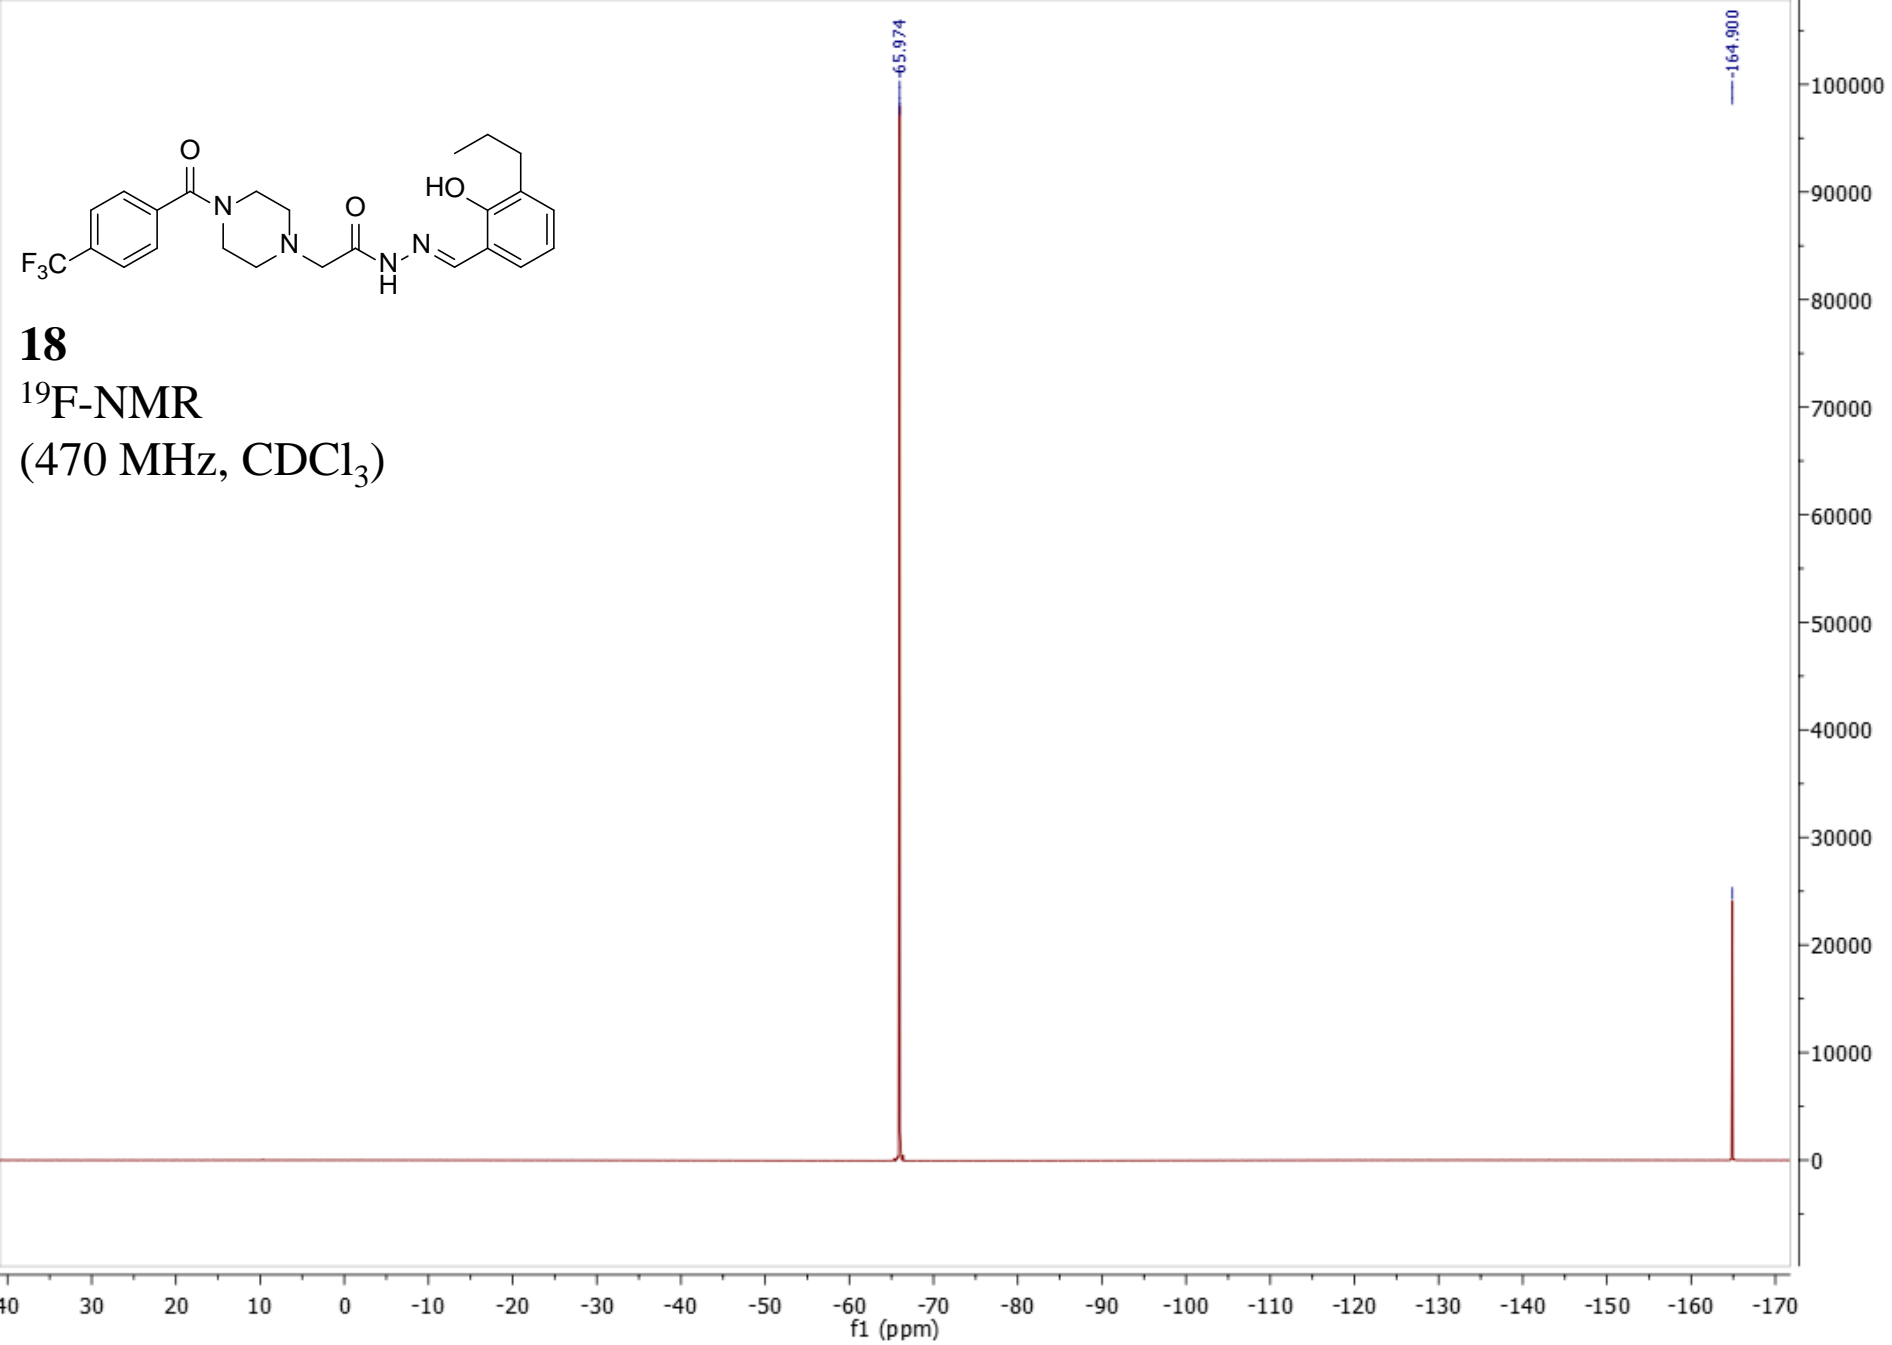

S102

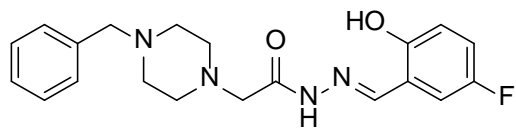

**19**

$^1\text{H-NMR}$   
(500 MHz,  $\text{CDCl}_3$ )

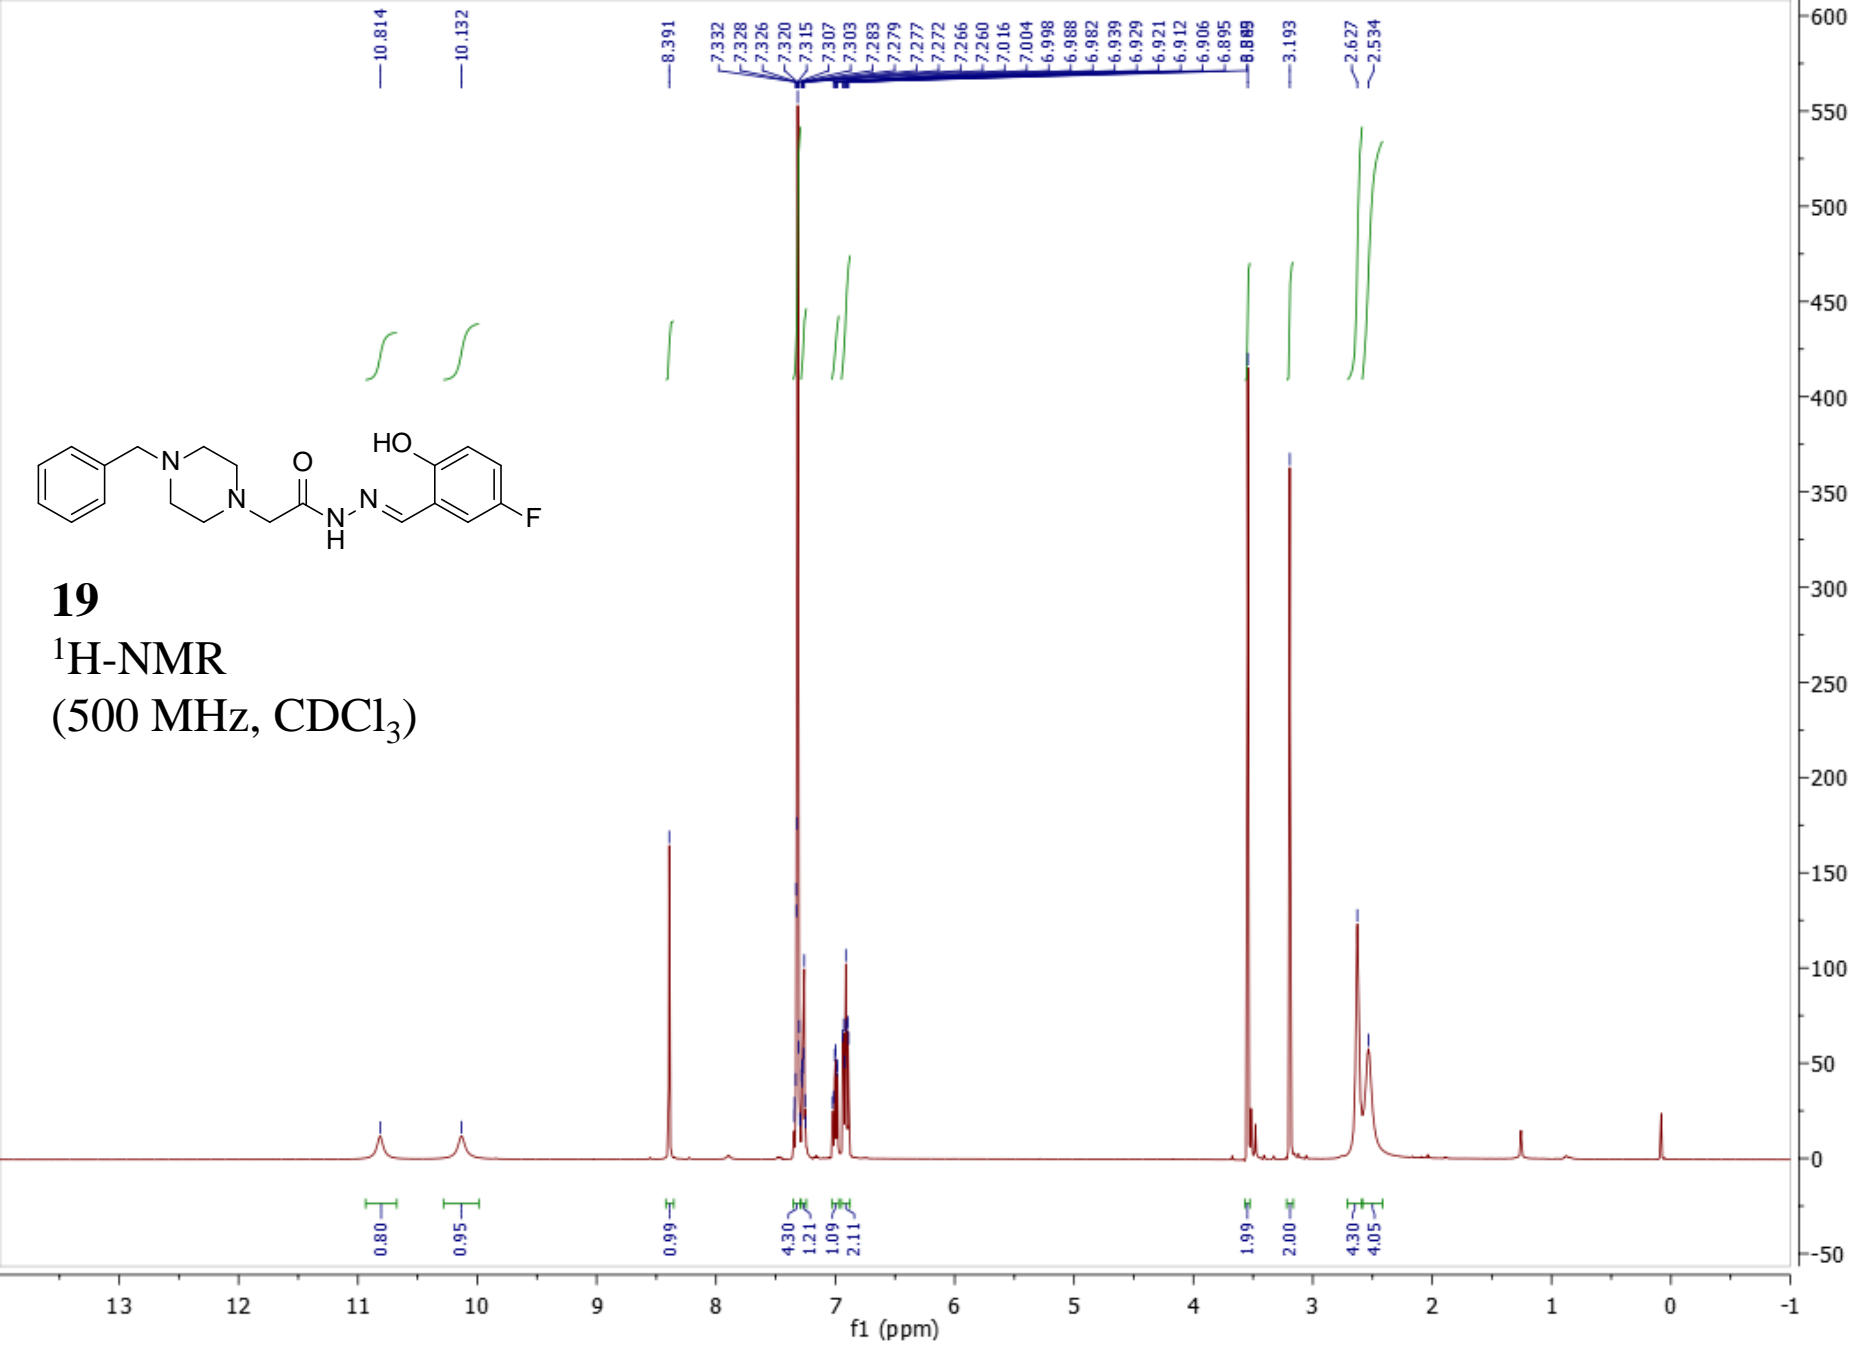

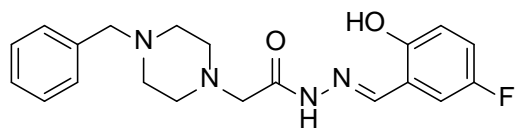

**19**  
 $^{13}\text{C}$ -NMR  
(125 MHz,  $\text{CDCl}_3$ )

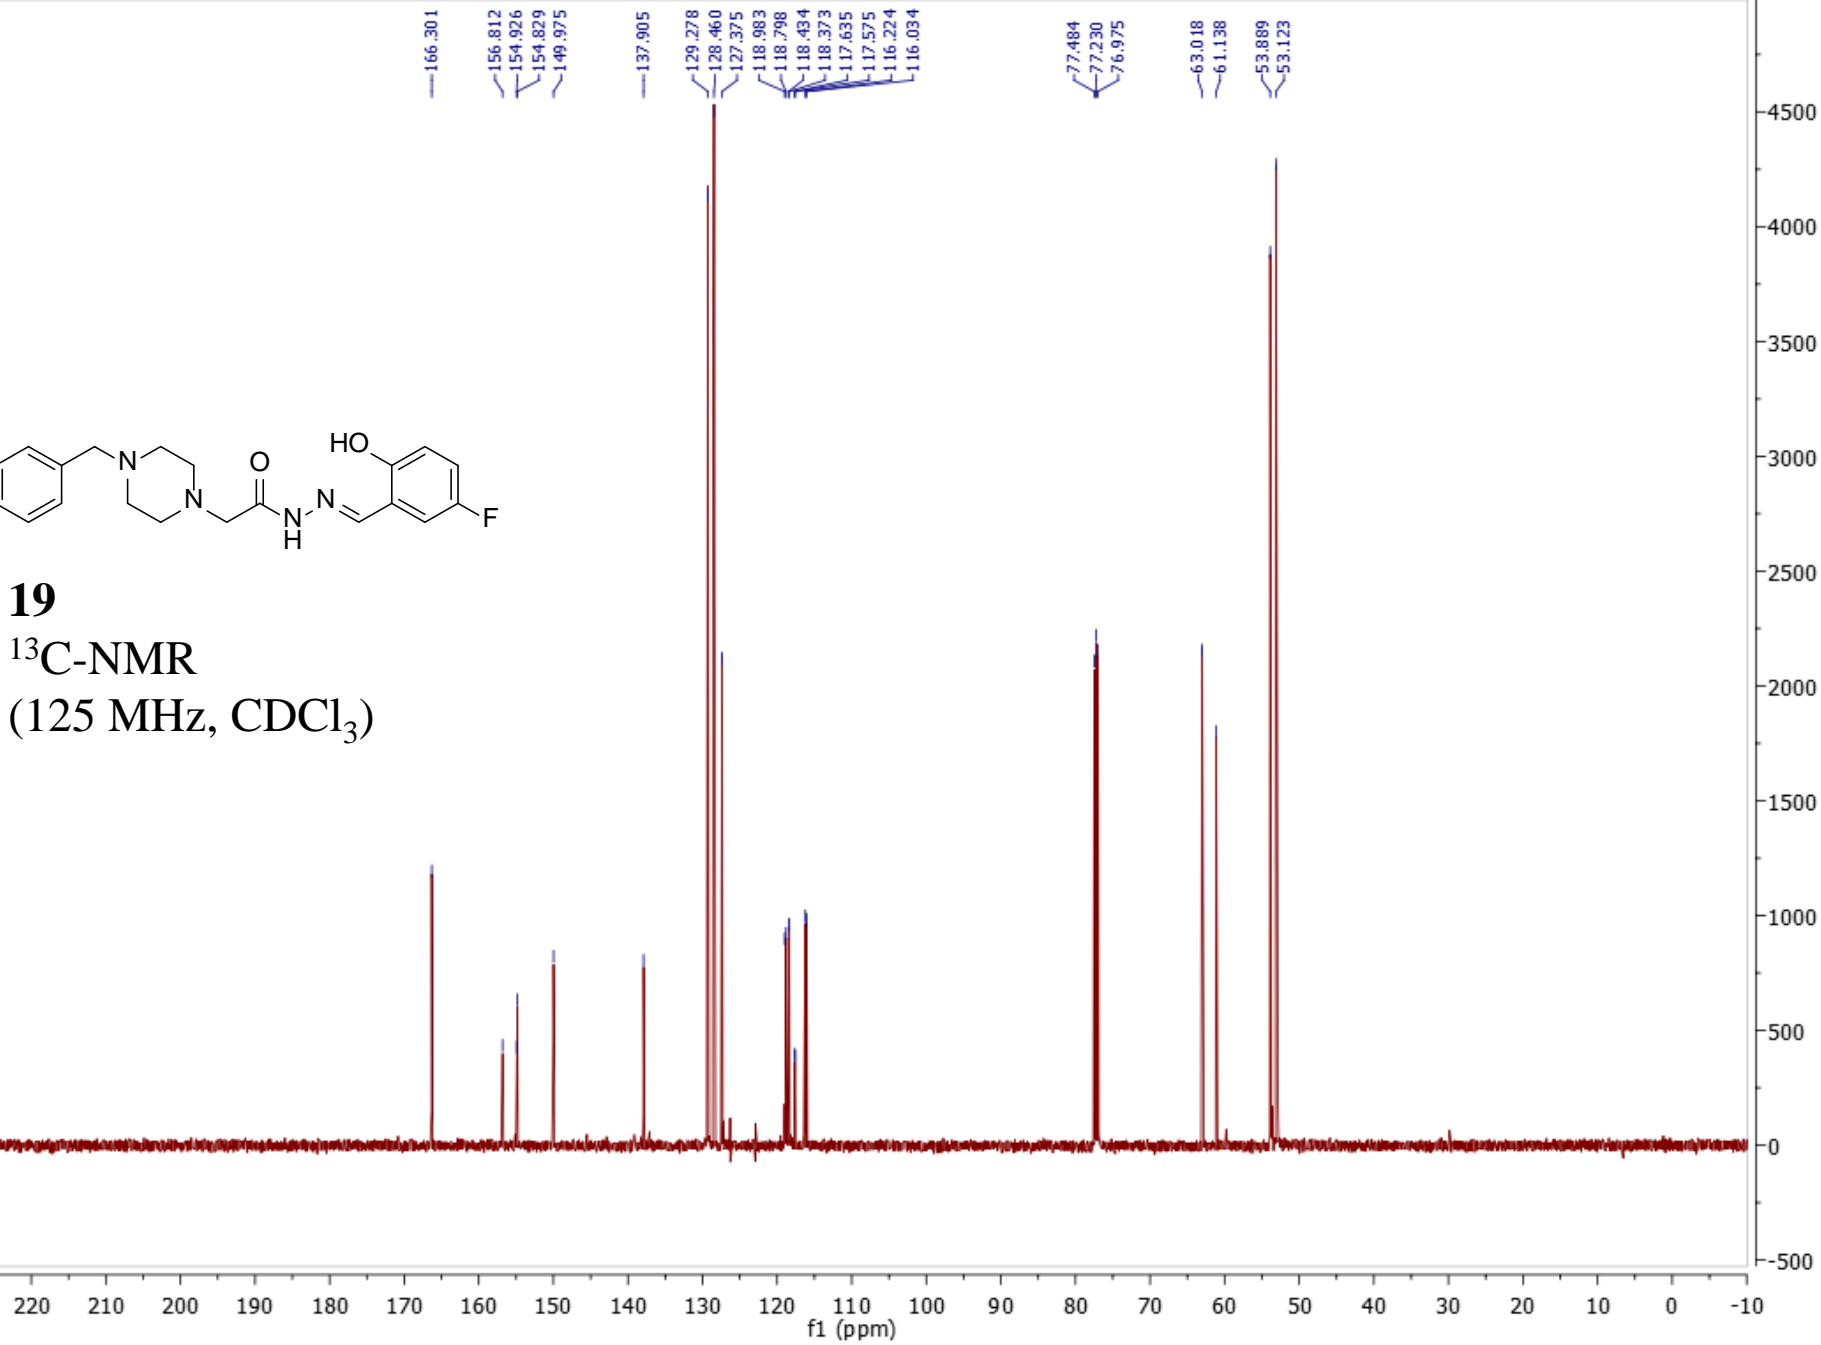



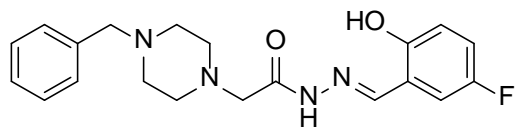

**19**

$^{19}\text{F}$ -NMR

(470 MHz,  $\text{CDCl}_3$ )

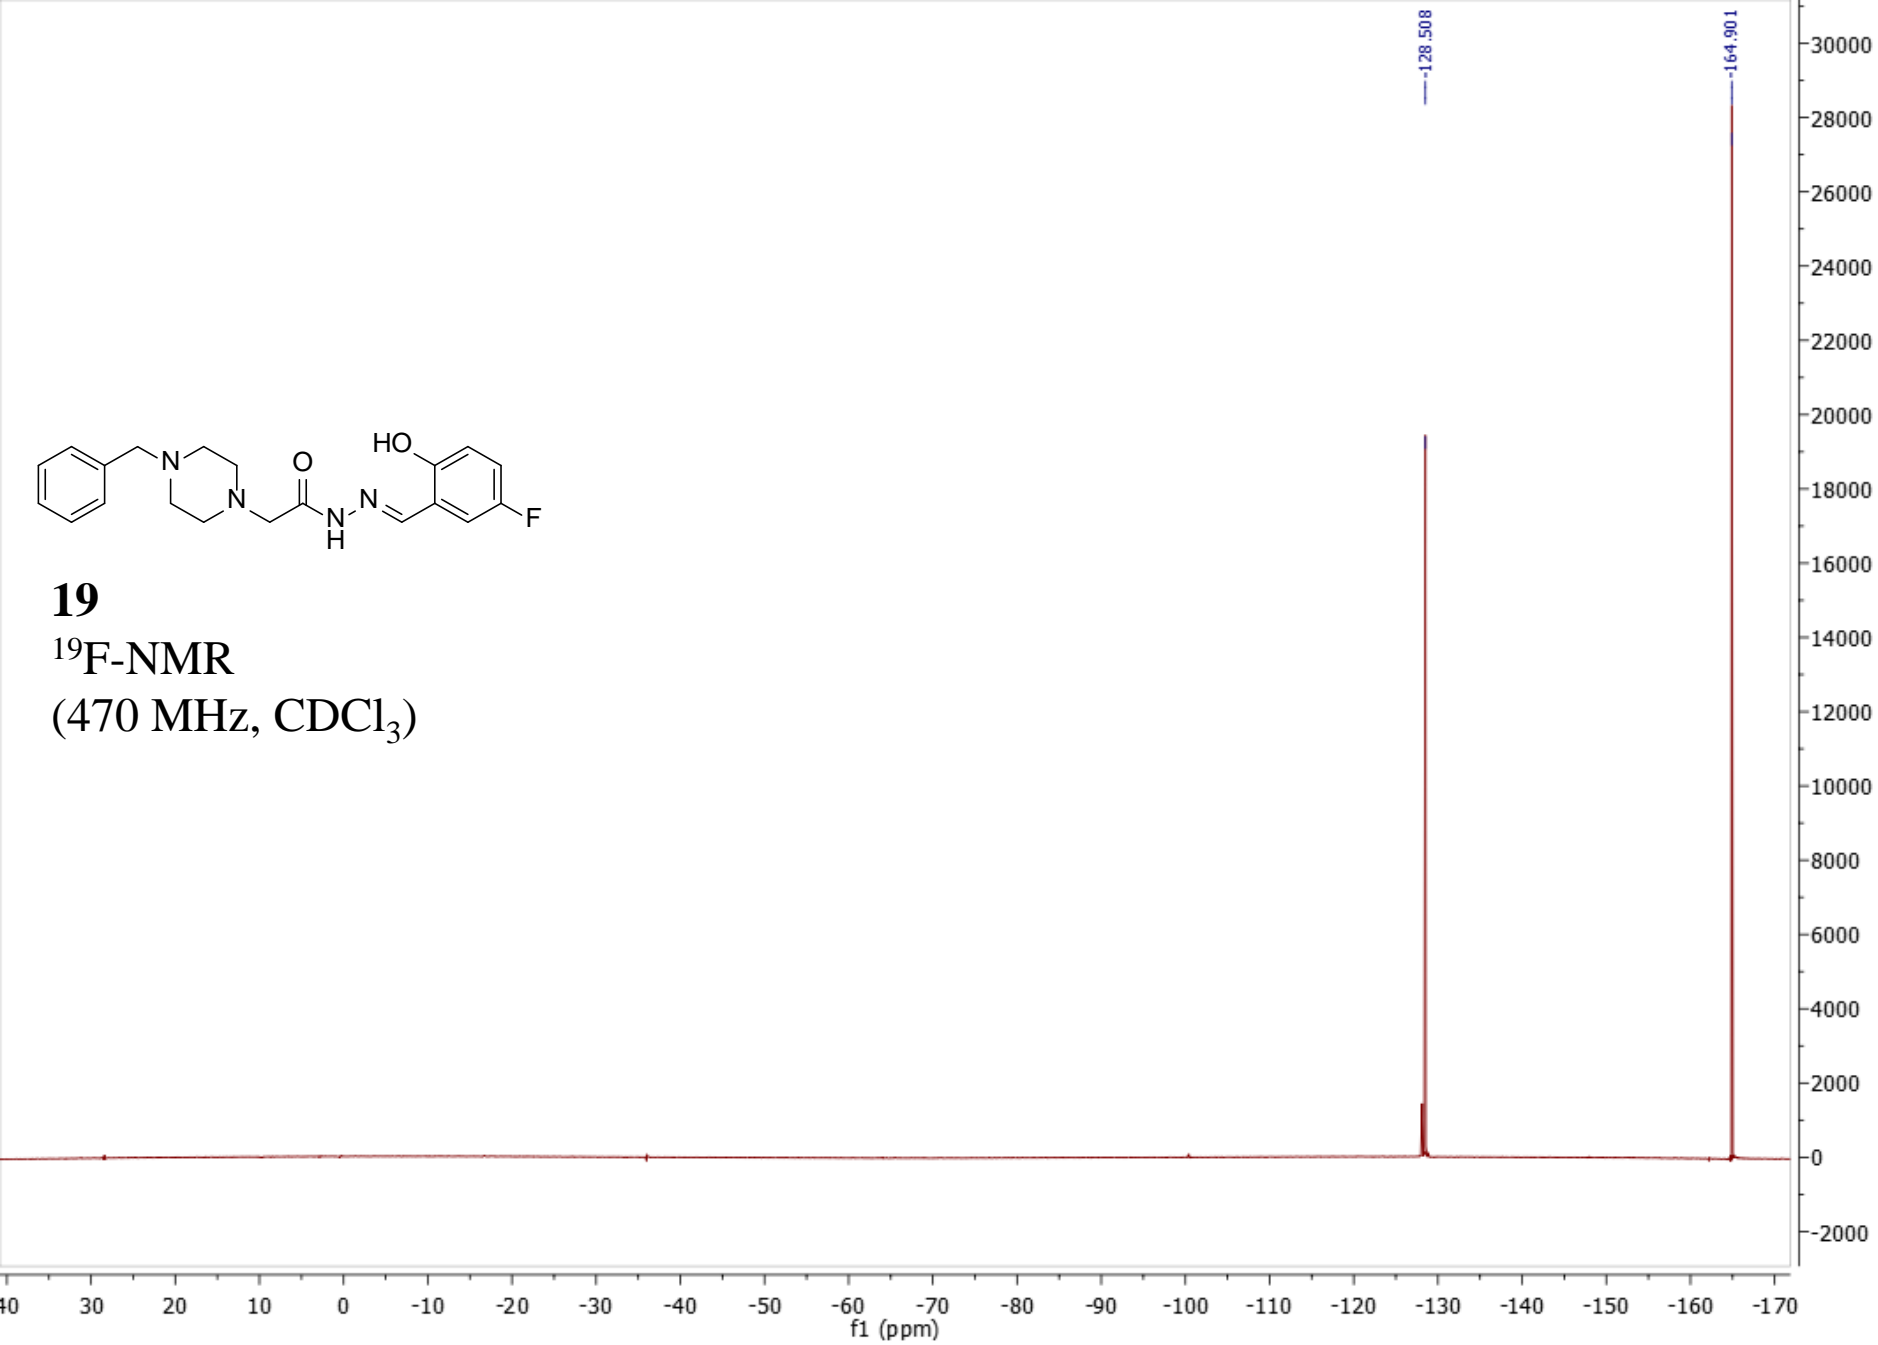

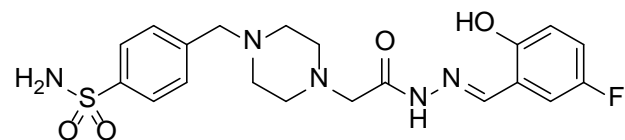

**20**  
<sup>1</sup>H-NMR  
 (500 MHz, (CD<sub>3</sub>)<sub>2</sub>CO)

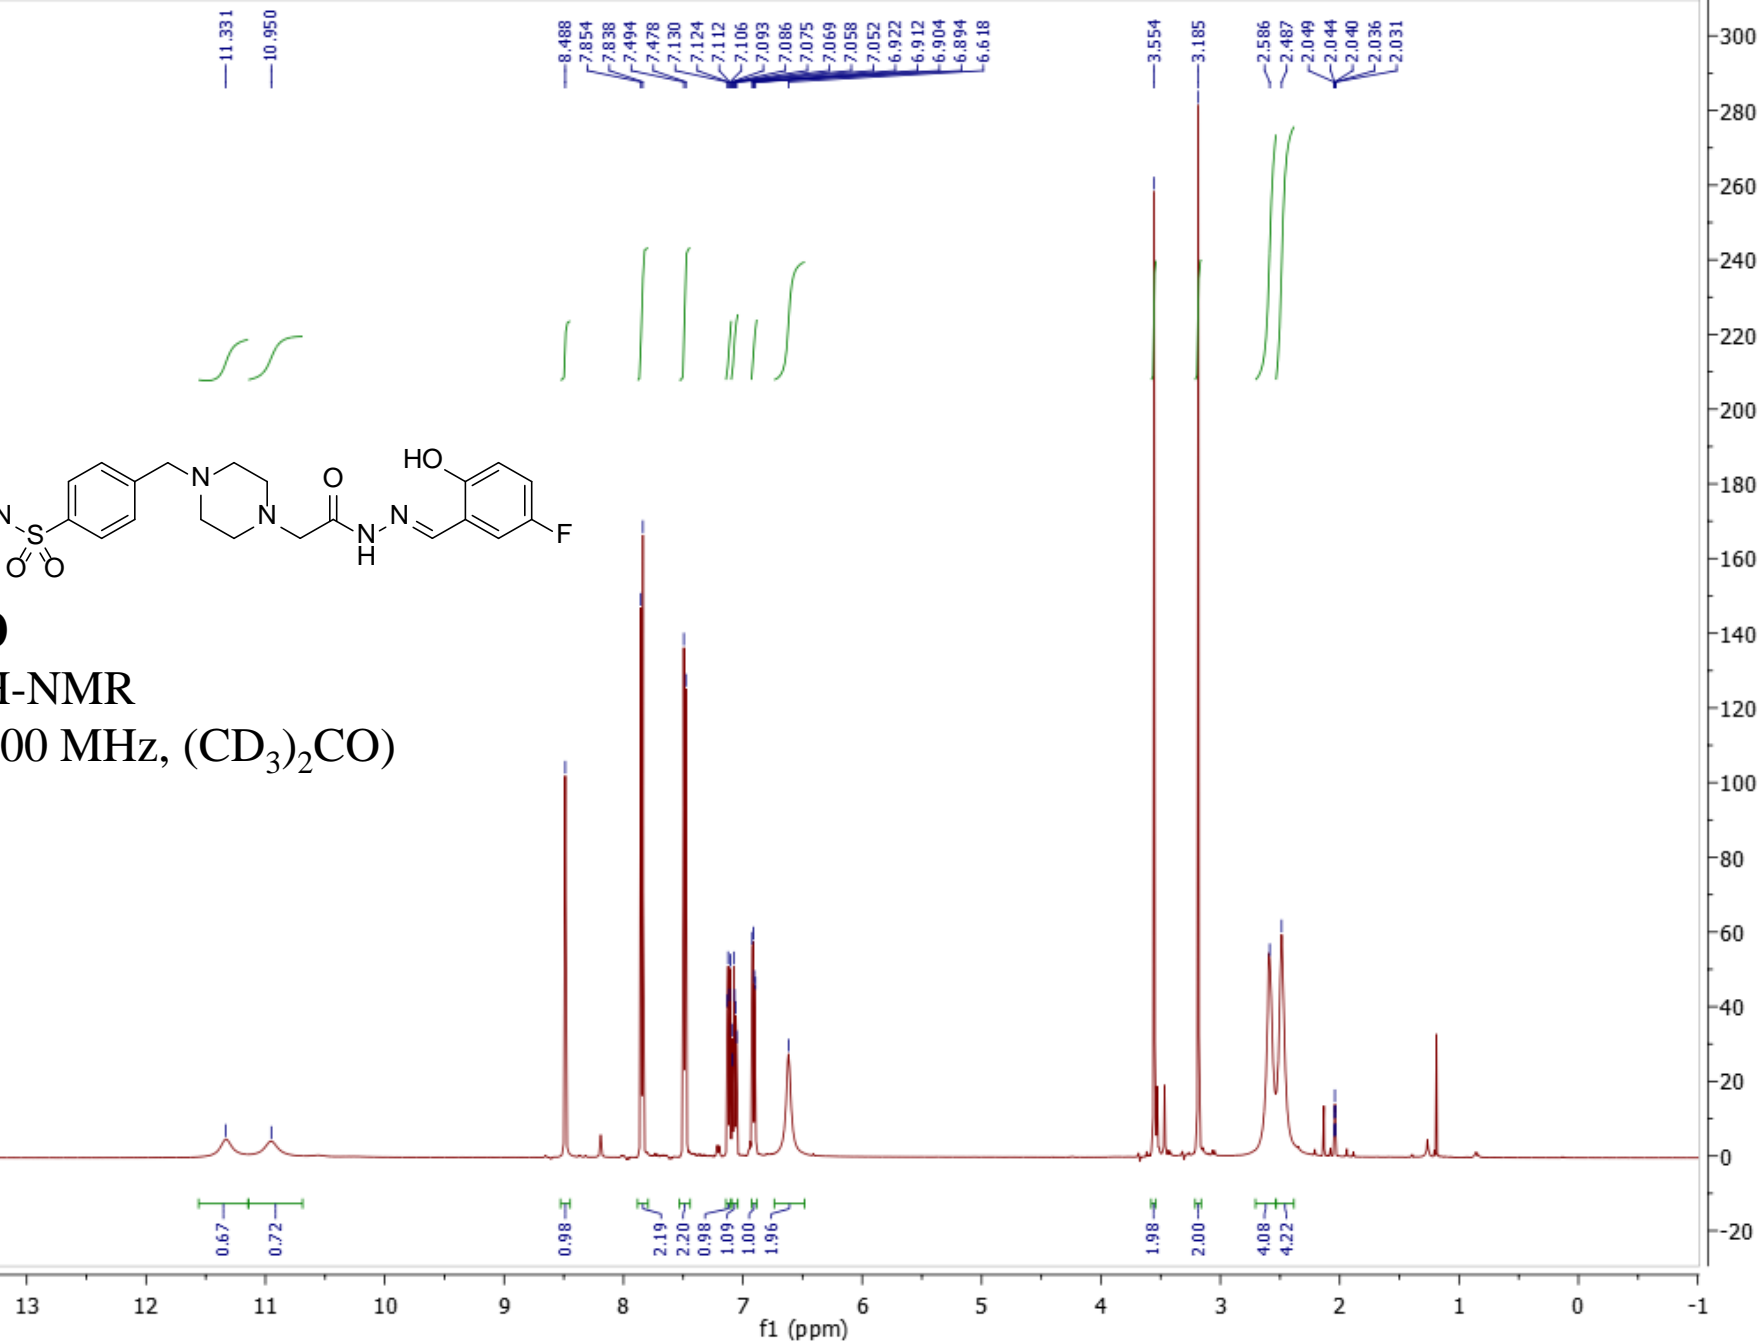

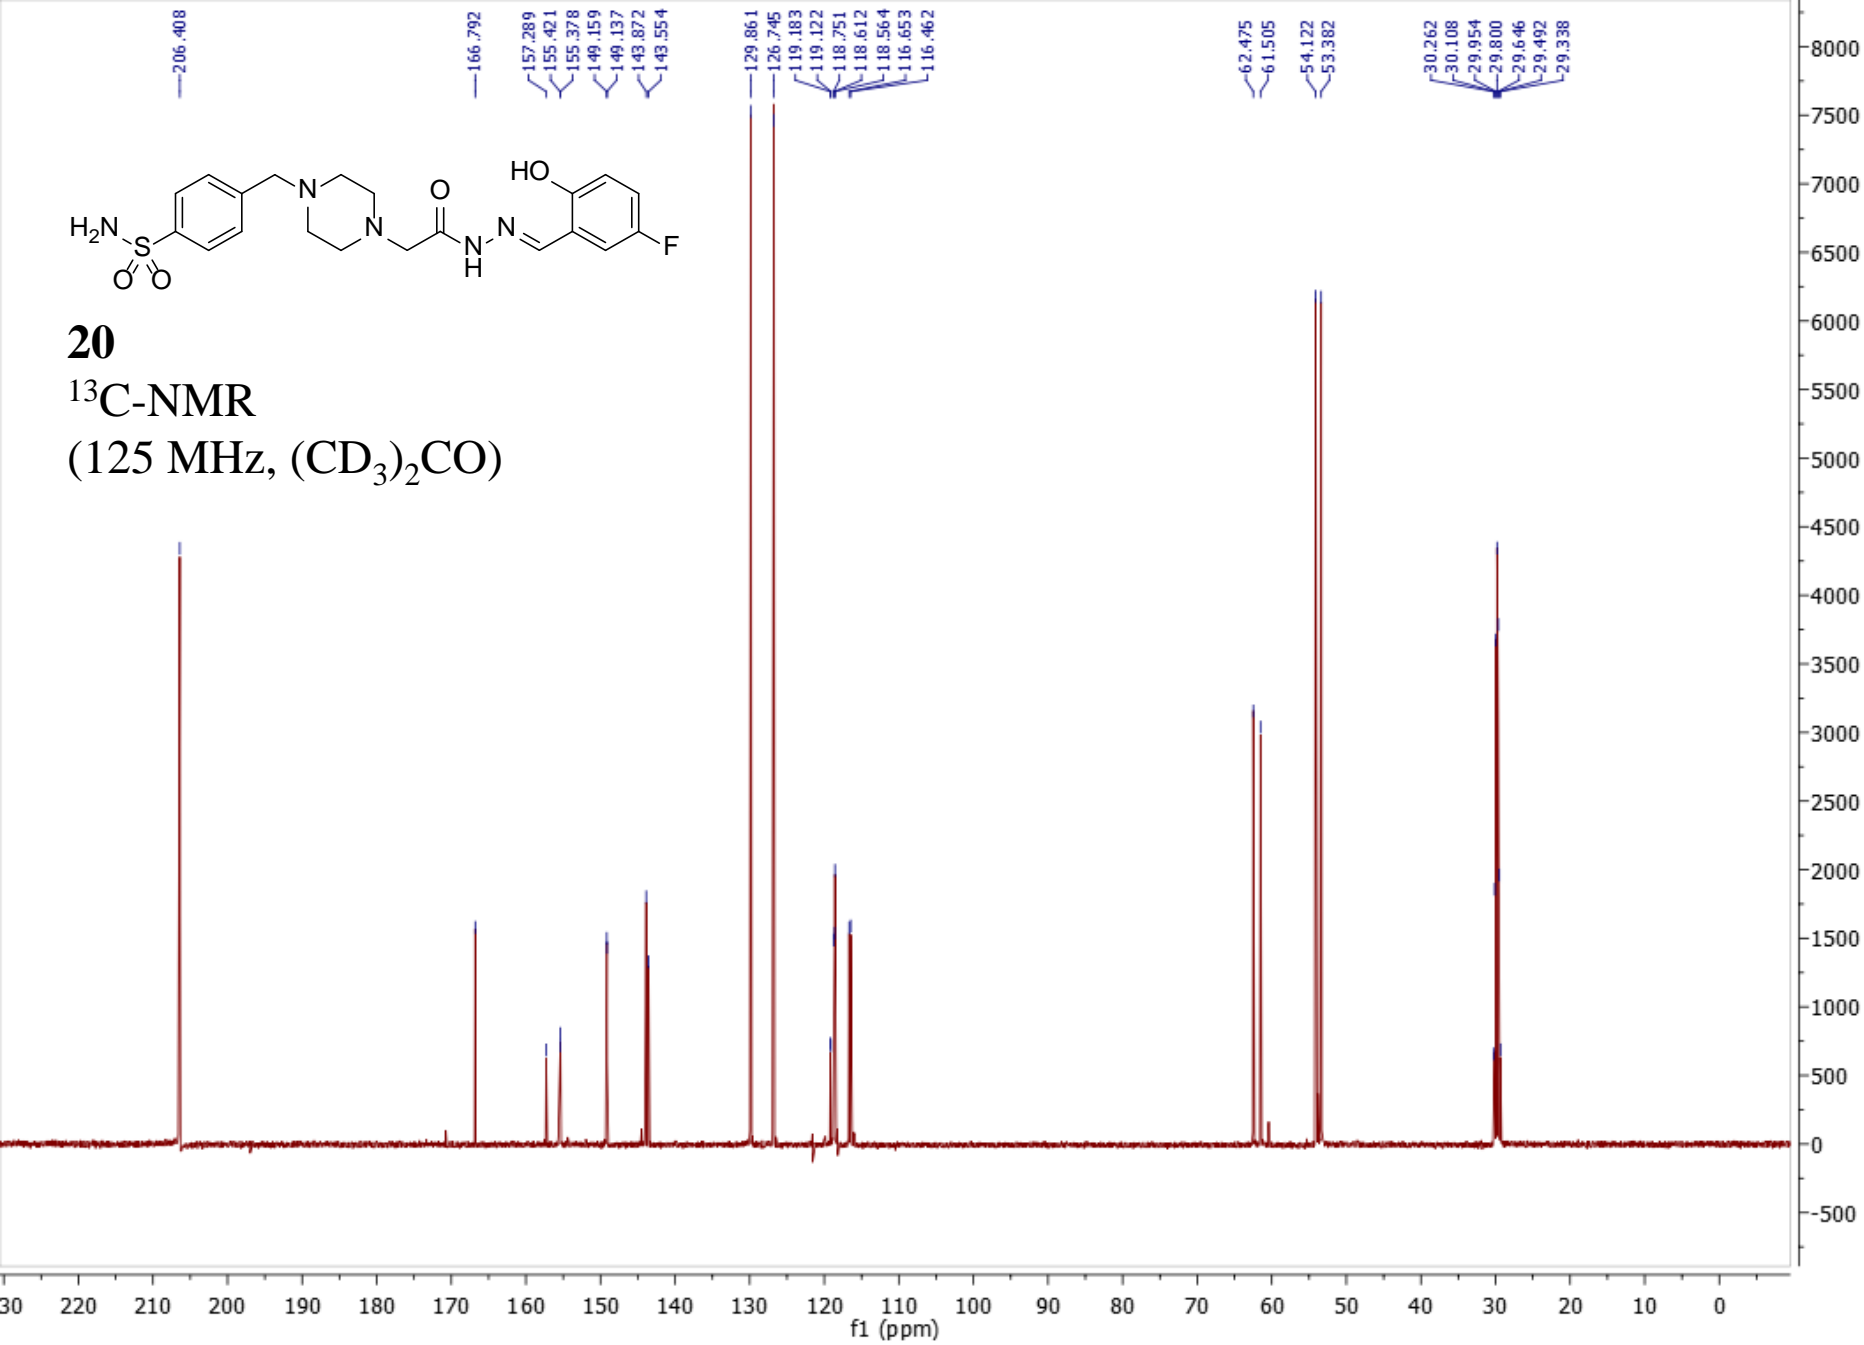

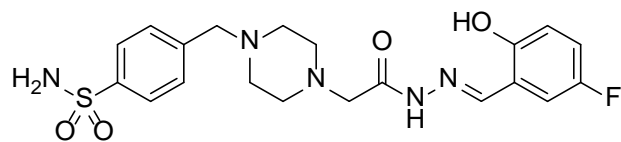

**20**

$^{19}\text{F}$ -NMR

(125 MHz,  $(\text{CD}_3)_2\text{CO}$ )

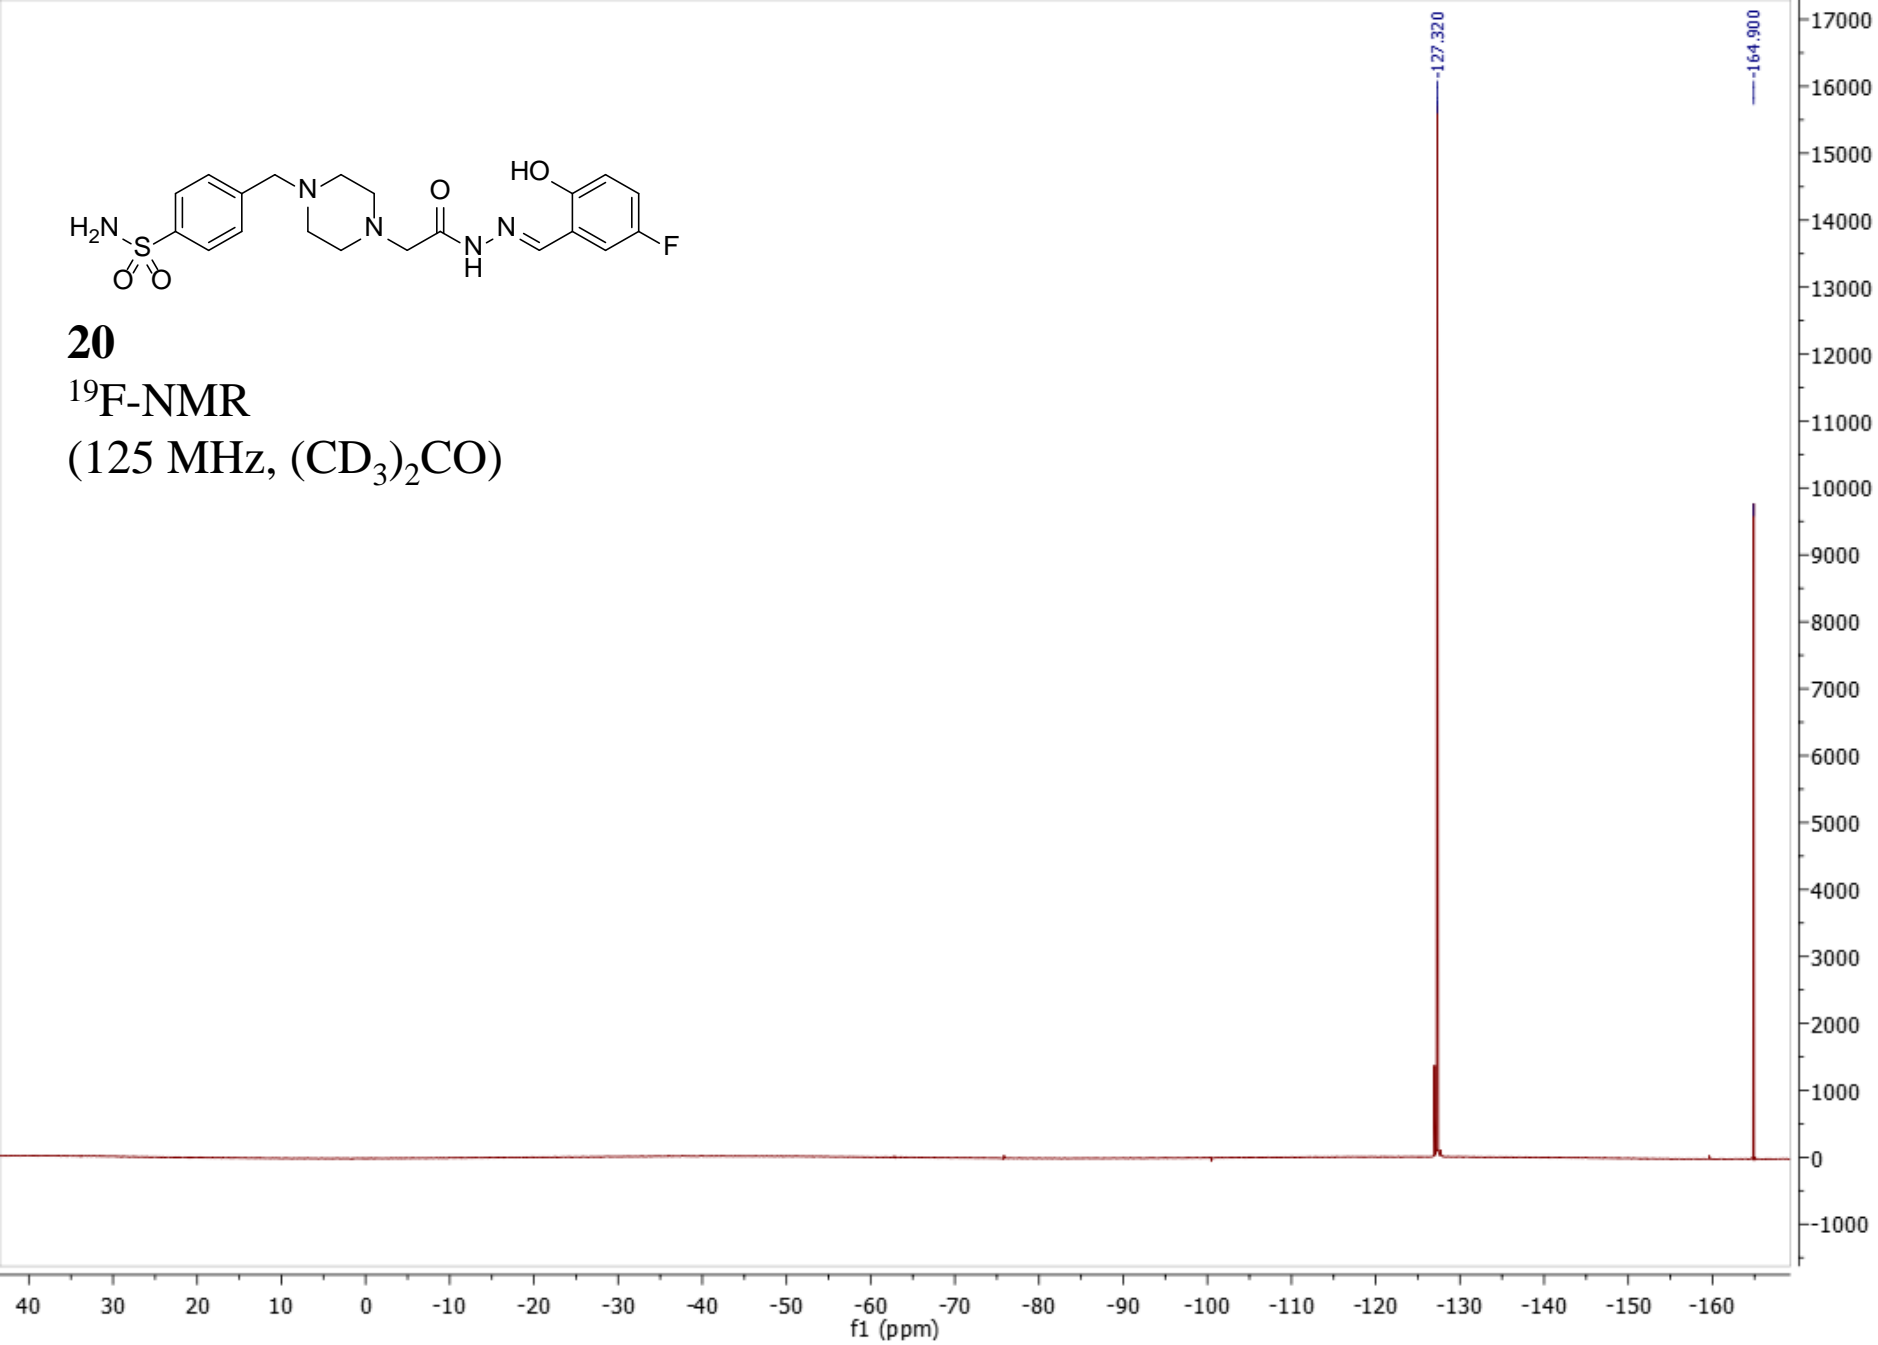

S108

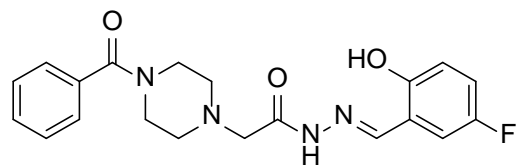

**21**  
<sup>1</sup>H-NMR  
(500 MHz, CDCl<sub>3</sub>)

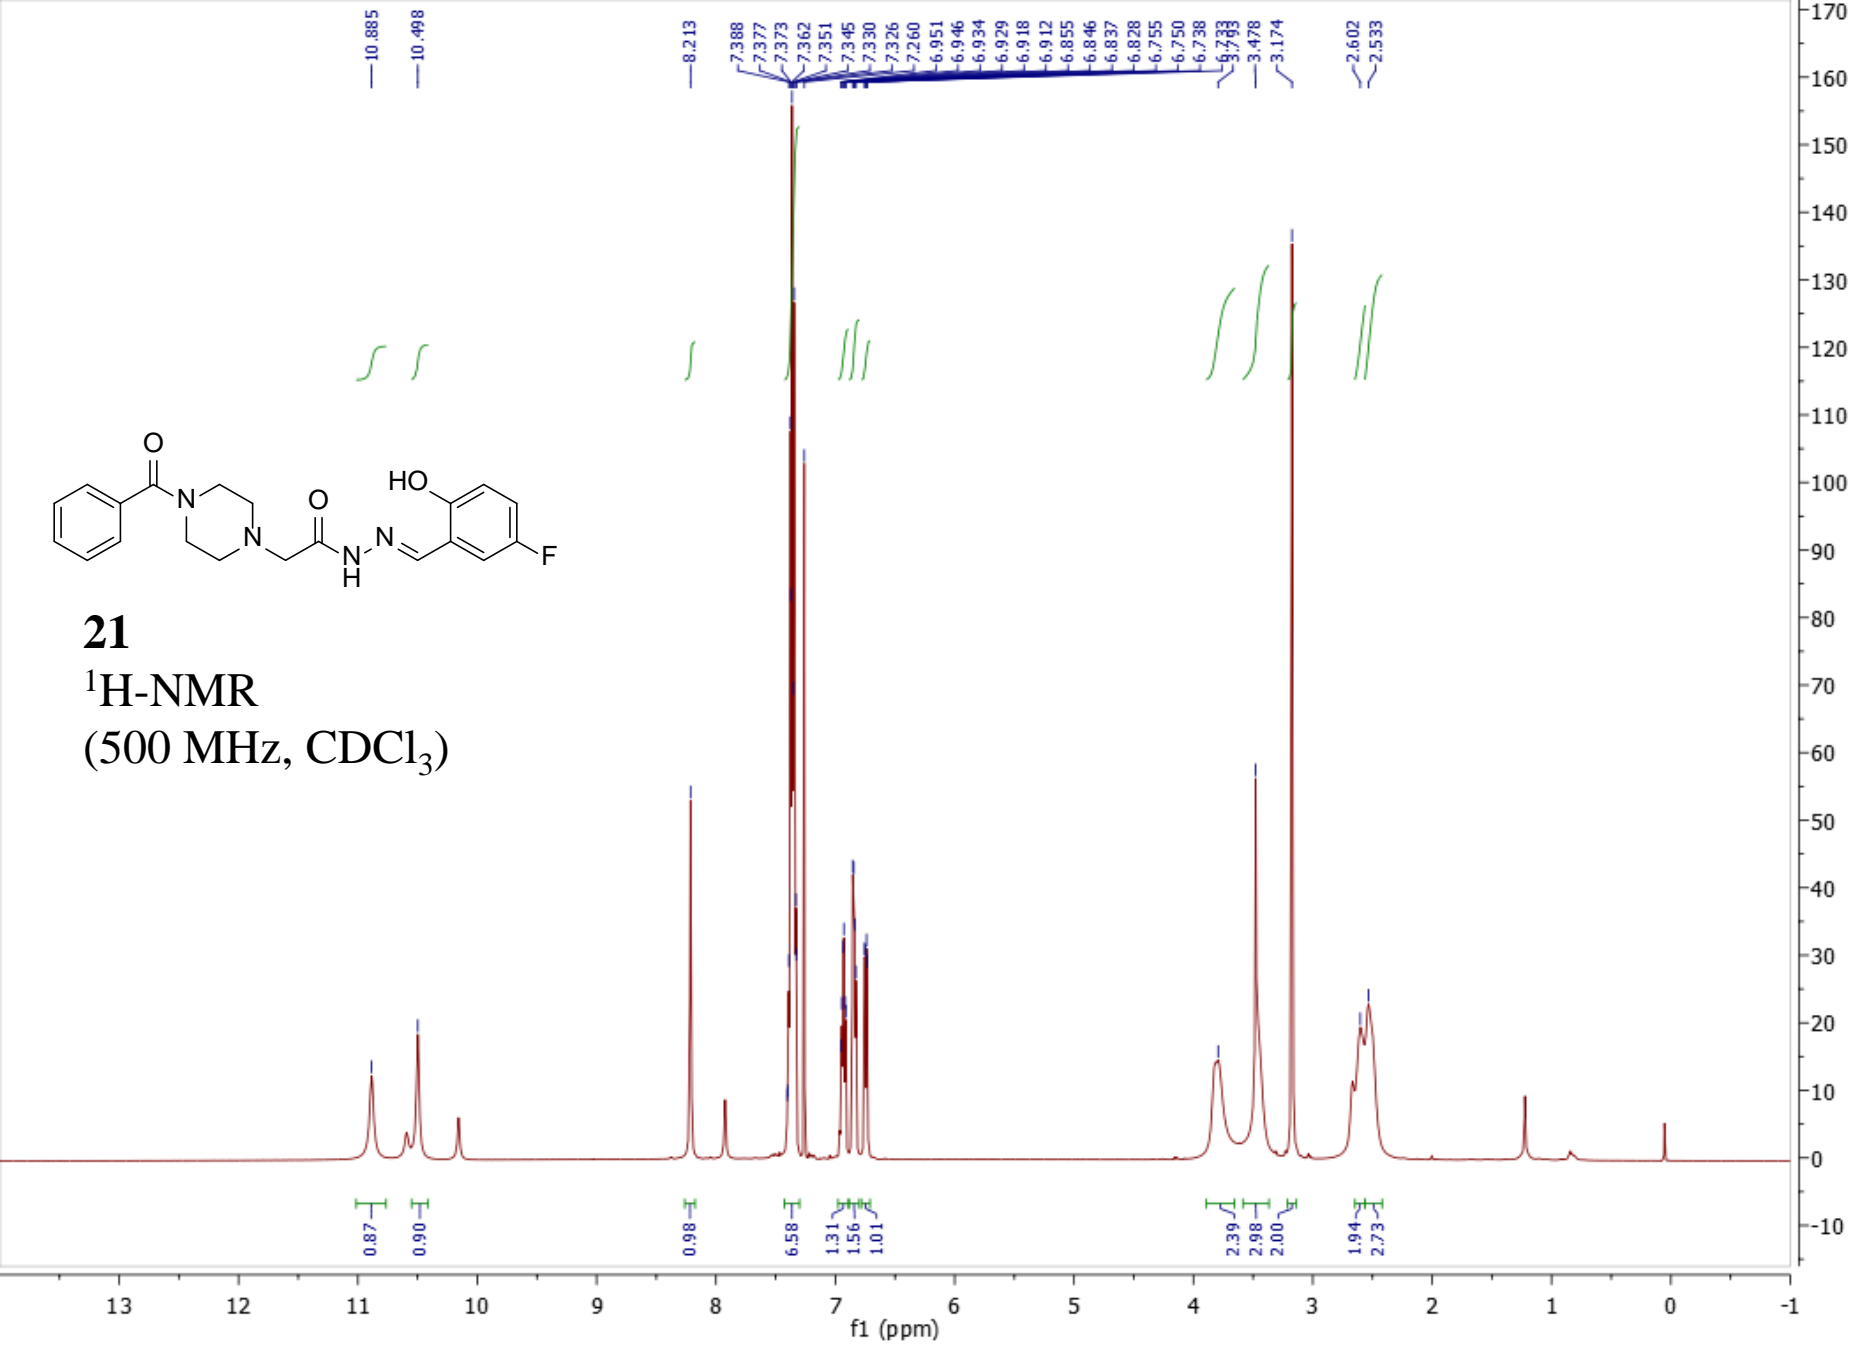

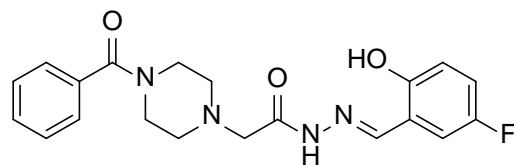

**21**  
 $^{13}\text{C}$ -NMR  
(125 MHz,  $\text{CDCl}_3$ )

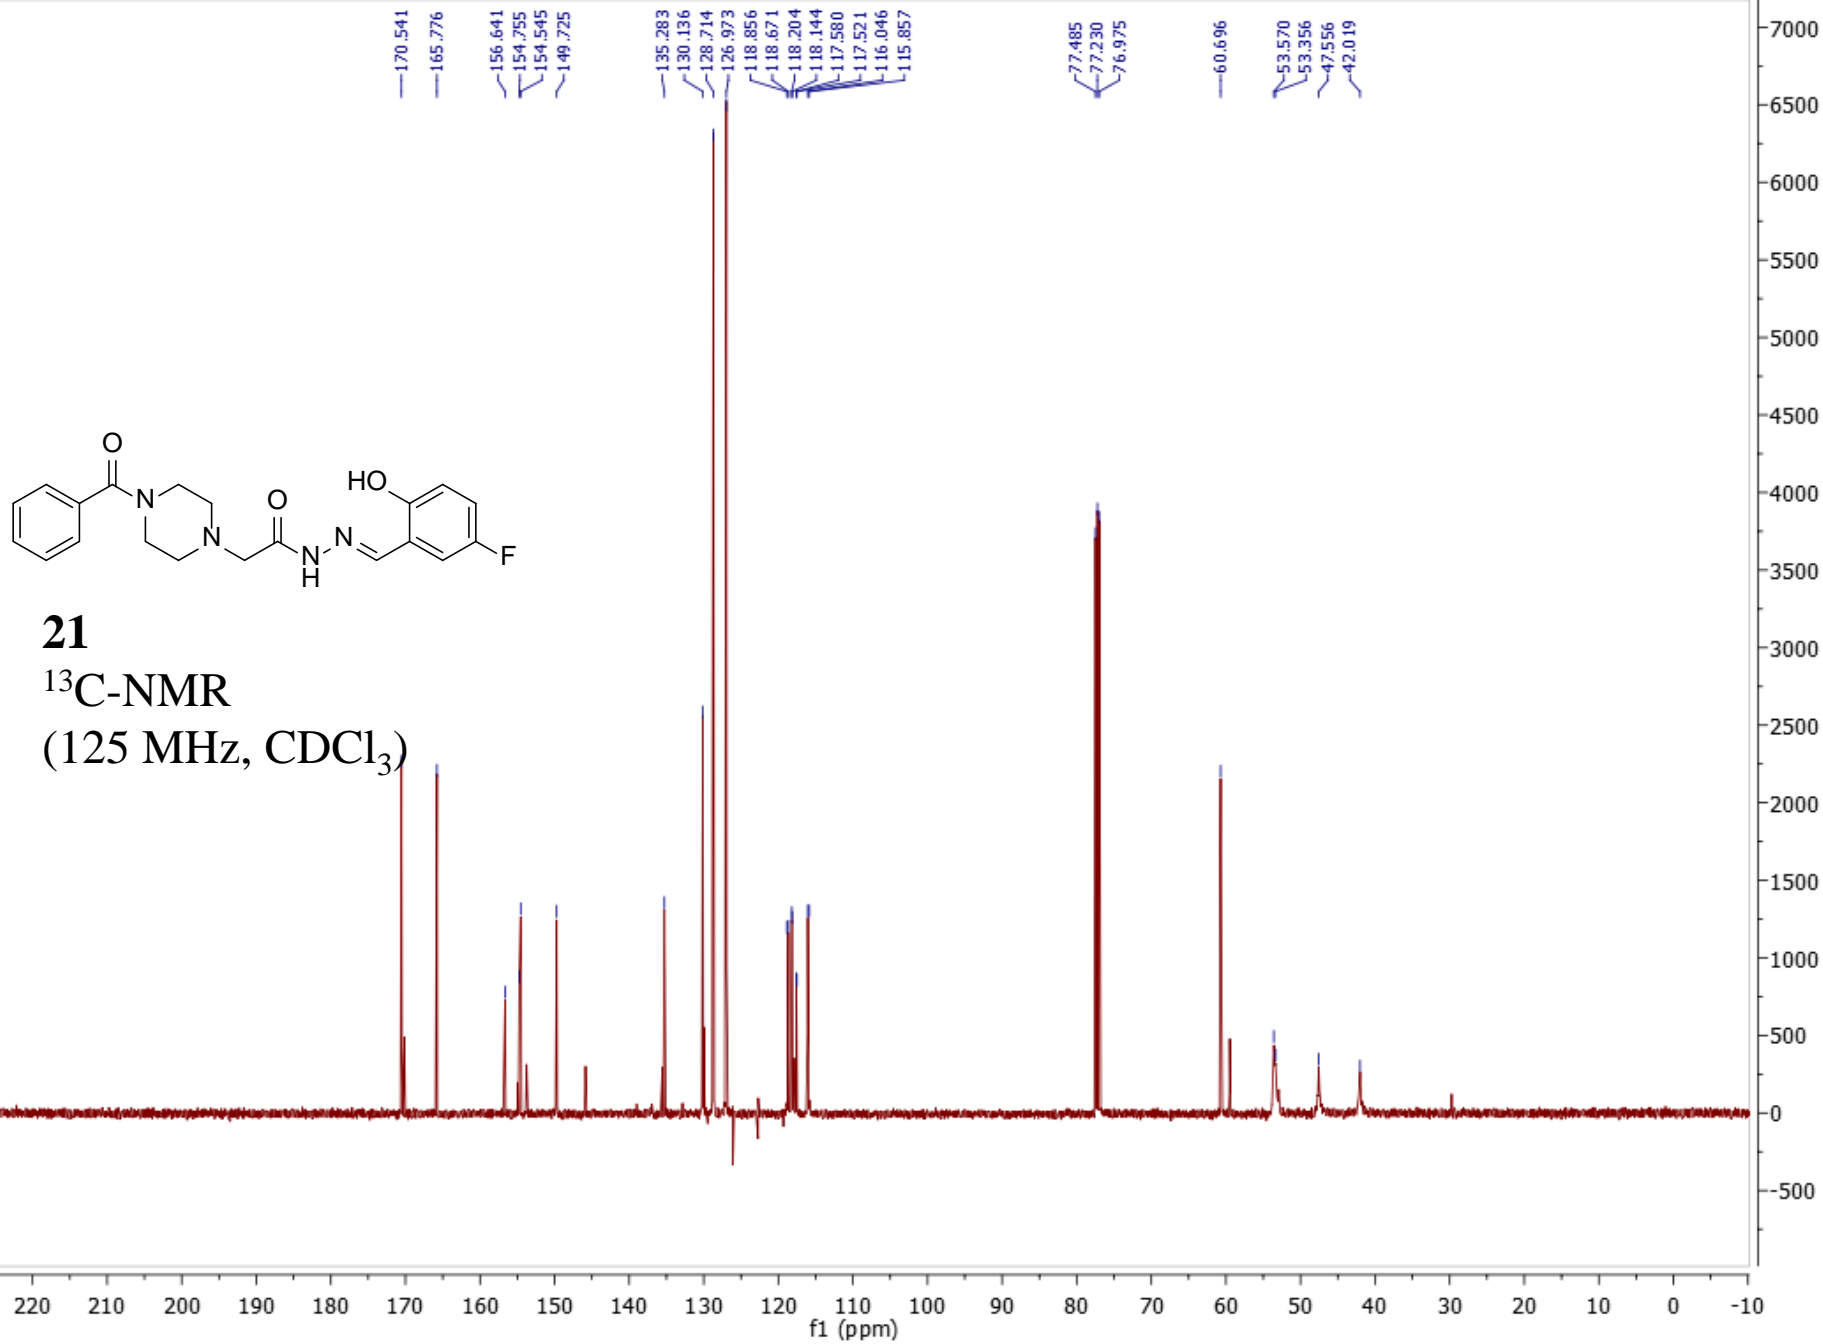



**21**

$^{19}\text{F}$ -NMR

(470 MHz,  $\text{CDCl}_3$ )

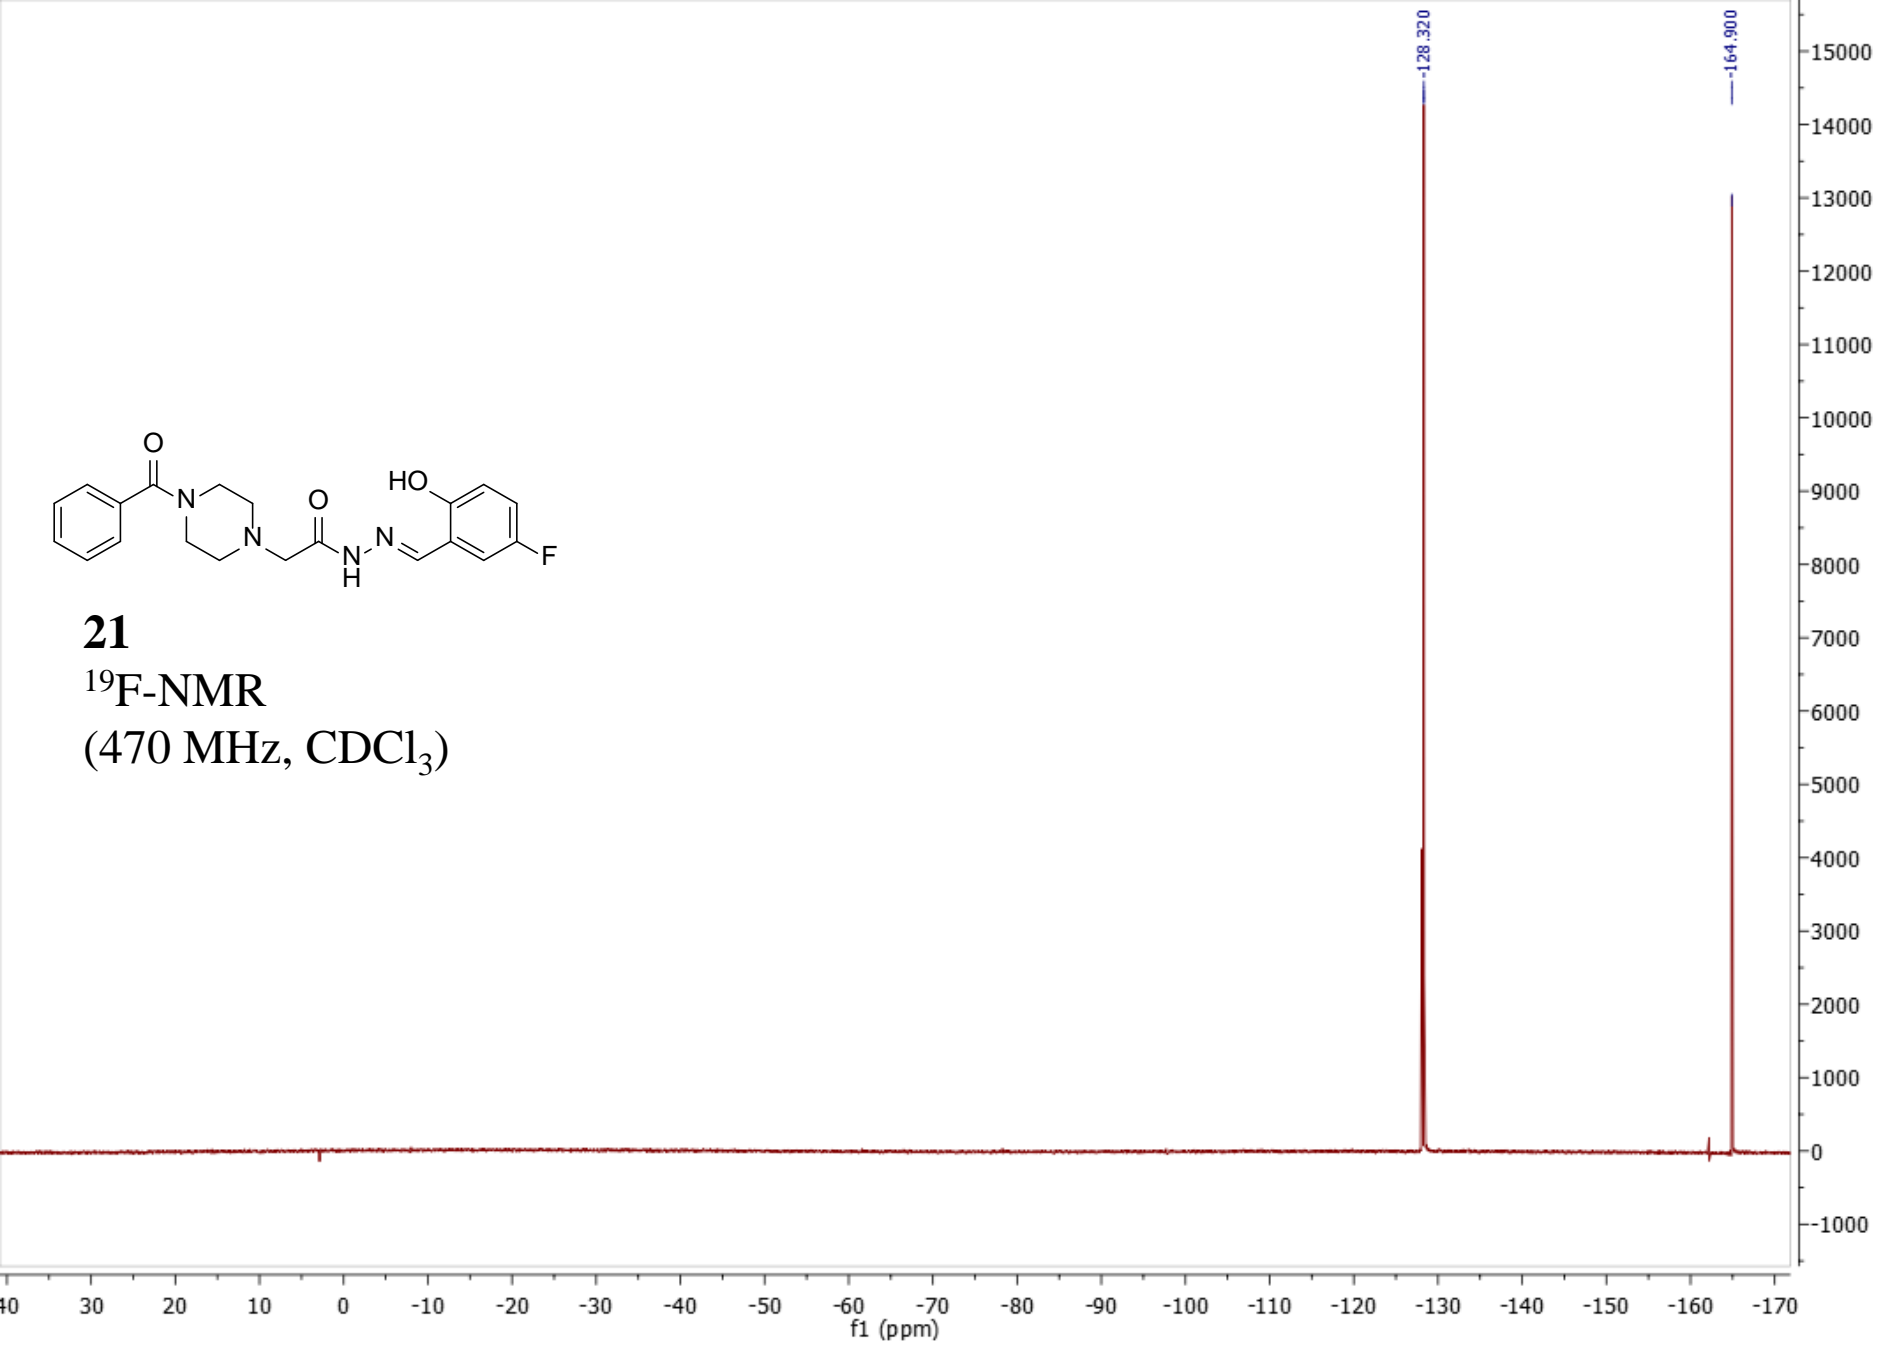

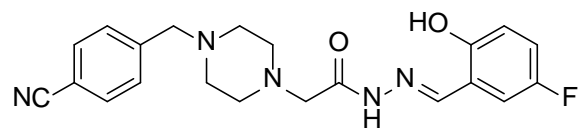

**22**

<sup>1</sup>H-NMR

(500 MHz, CDCl<sub>3</sub>)

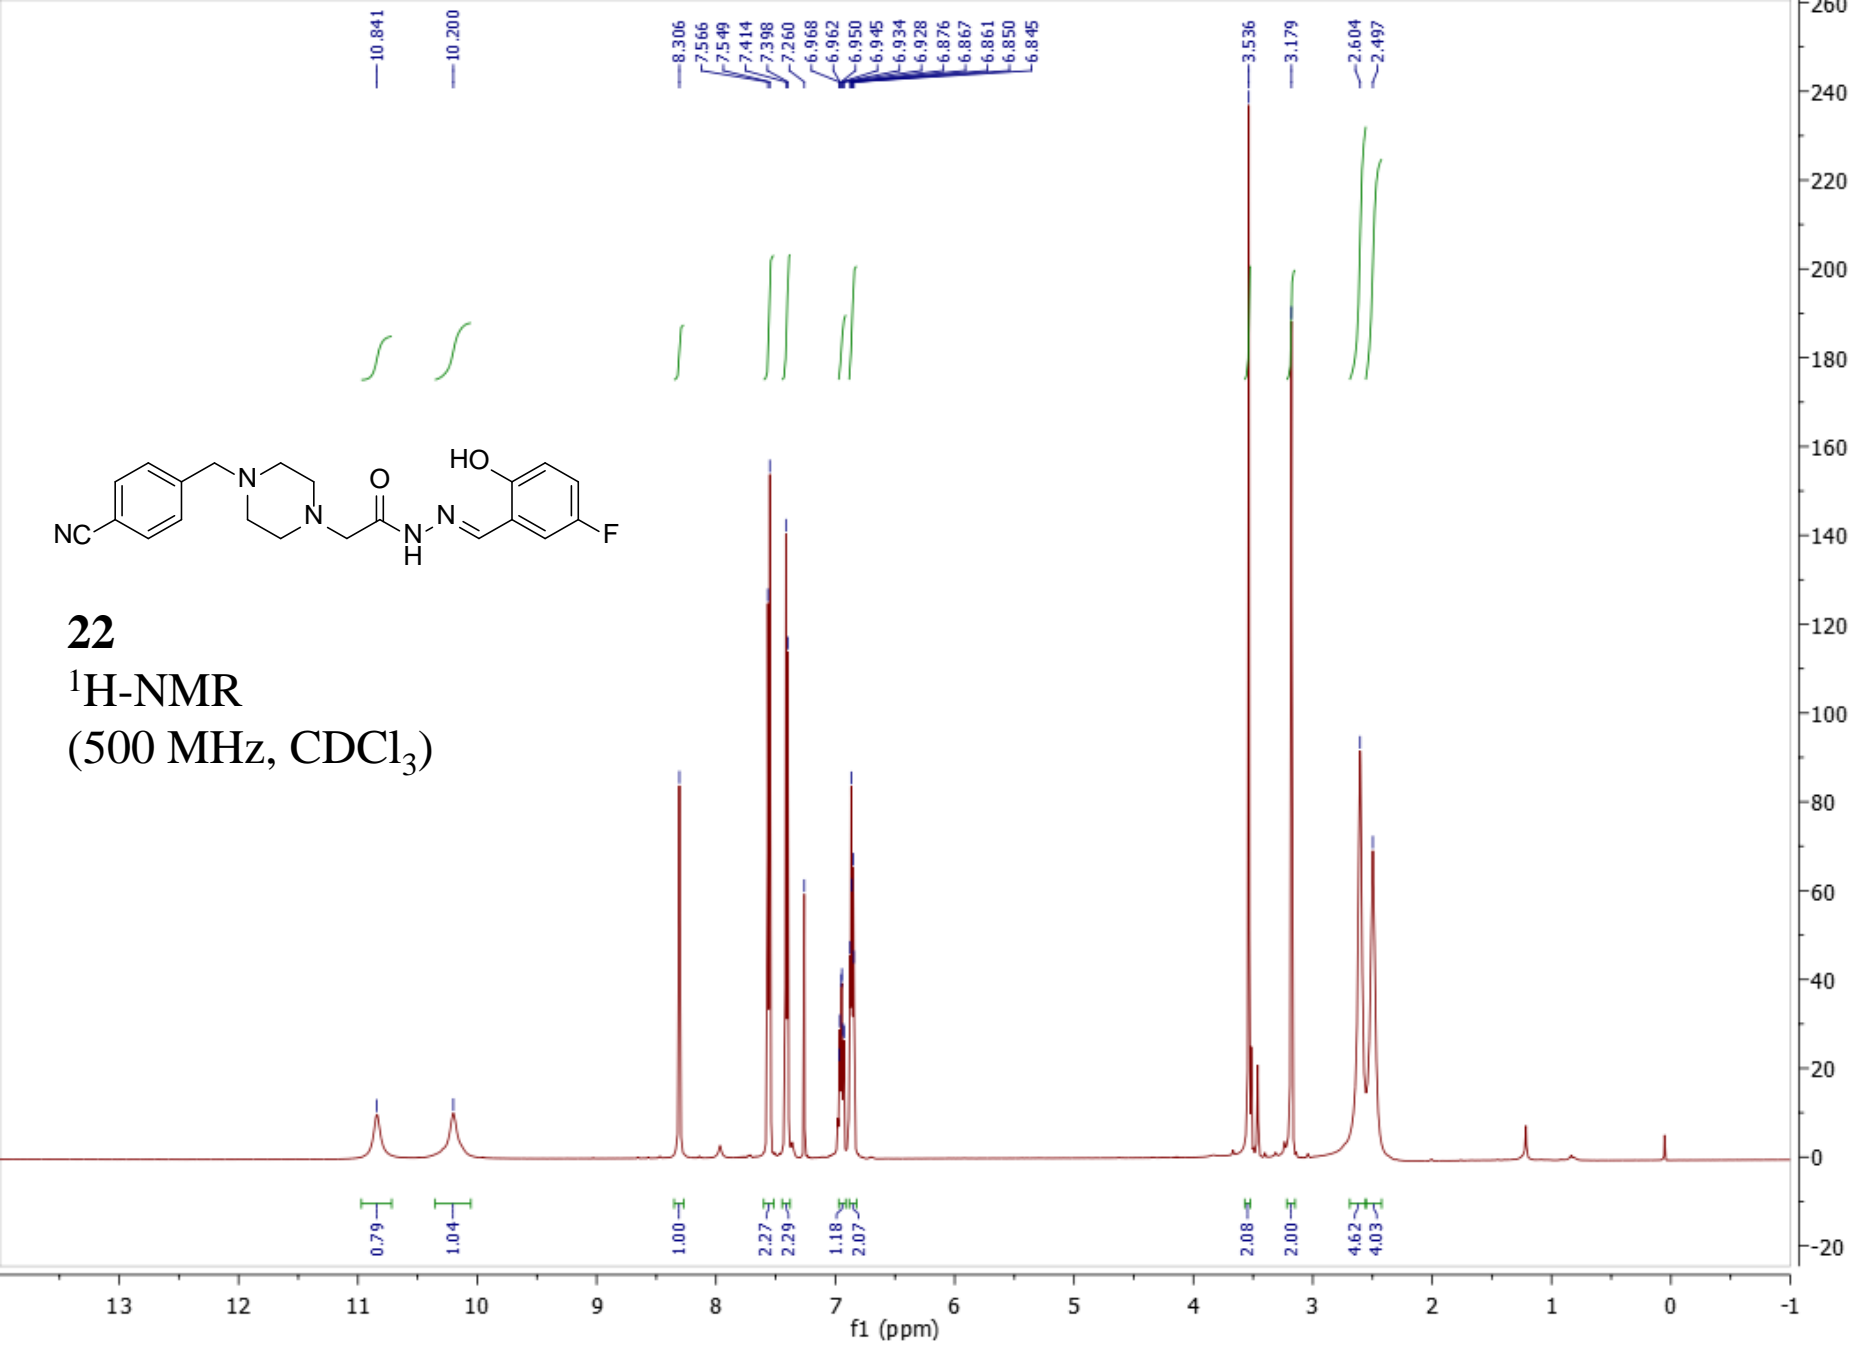



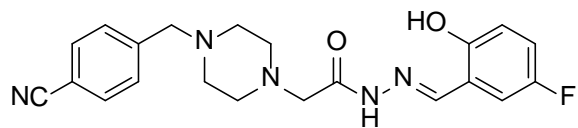

**22**

$^{13}\text{C}$ -NMR

(125 MHz,  $\text{CDCl}_3$ )

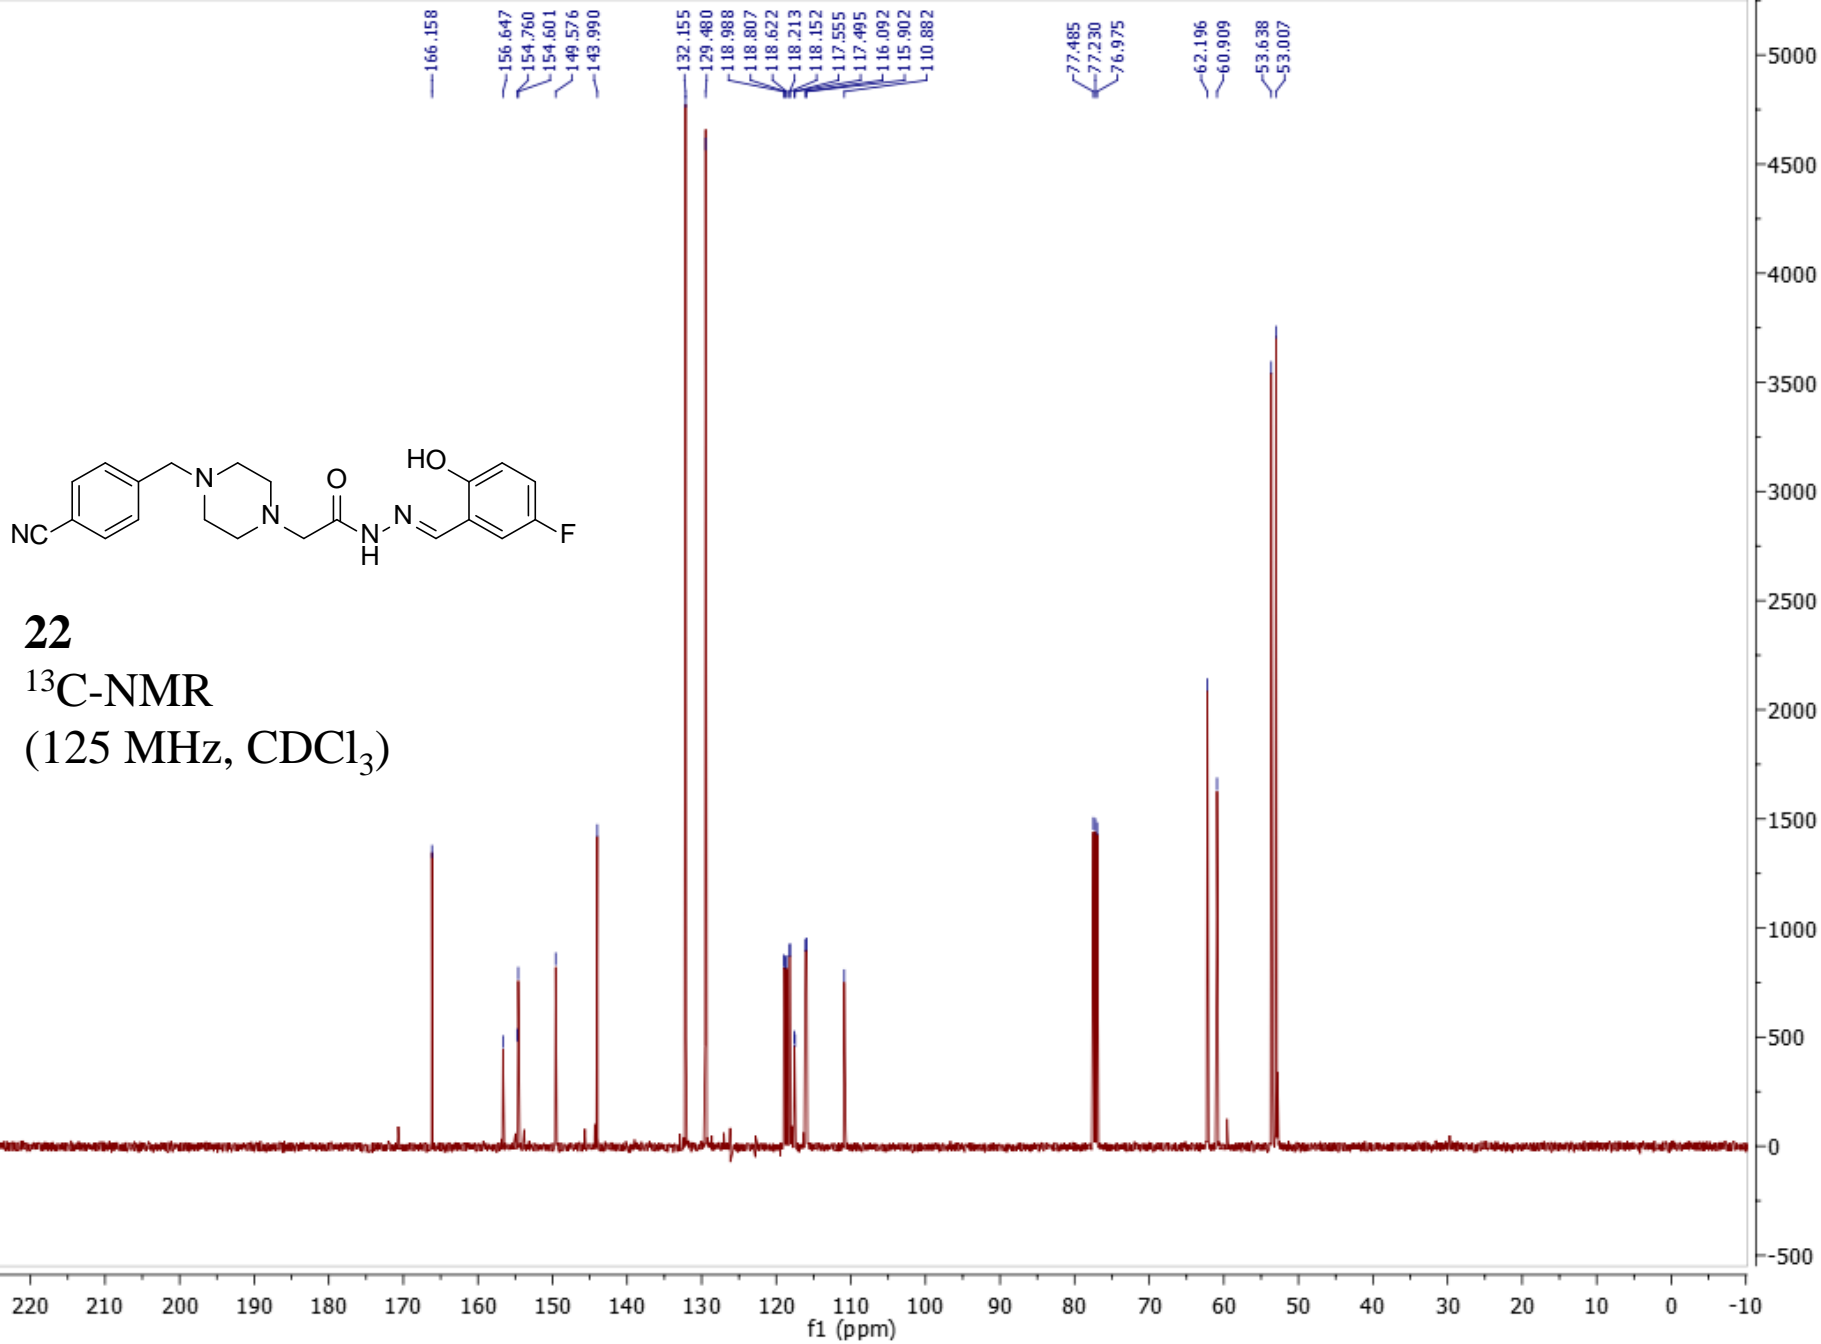

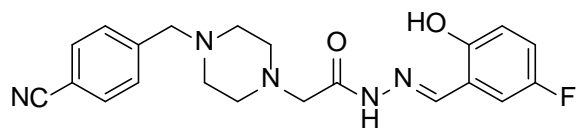

**22**

$^{19}\text{F}$ -NMR

(470 MHz,  $\text{CDCl}_3$ )

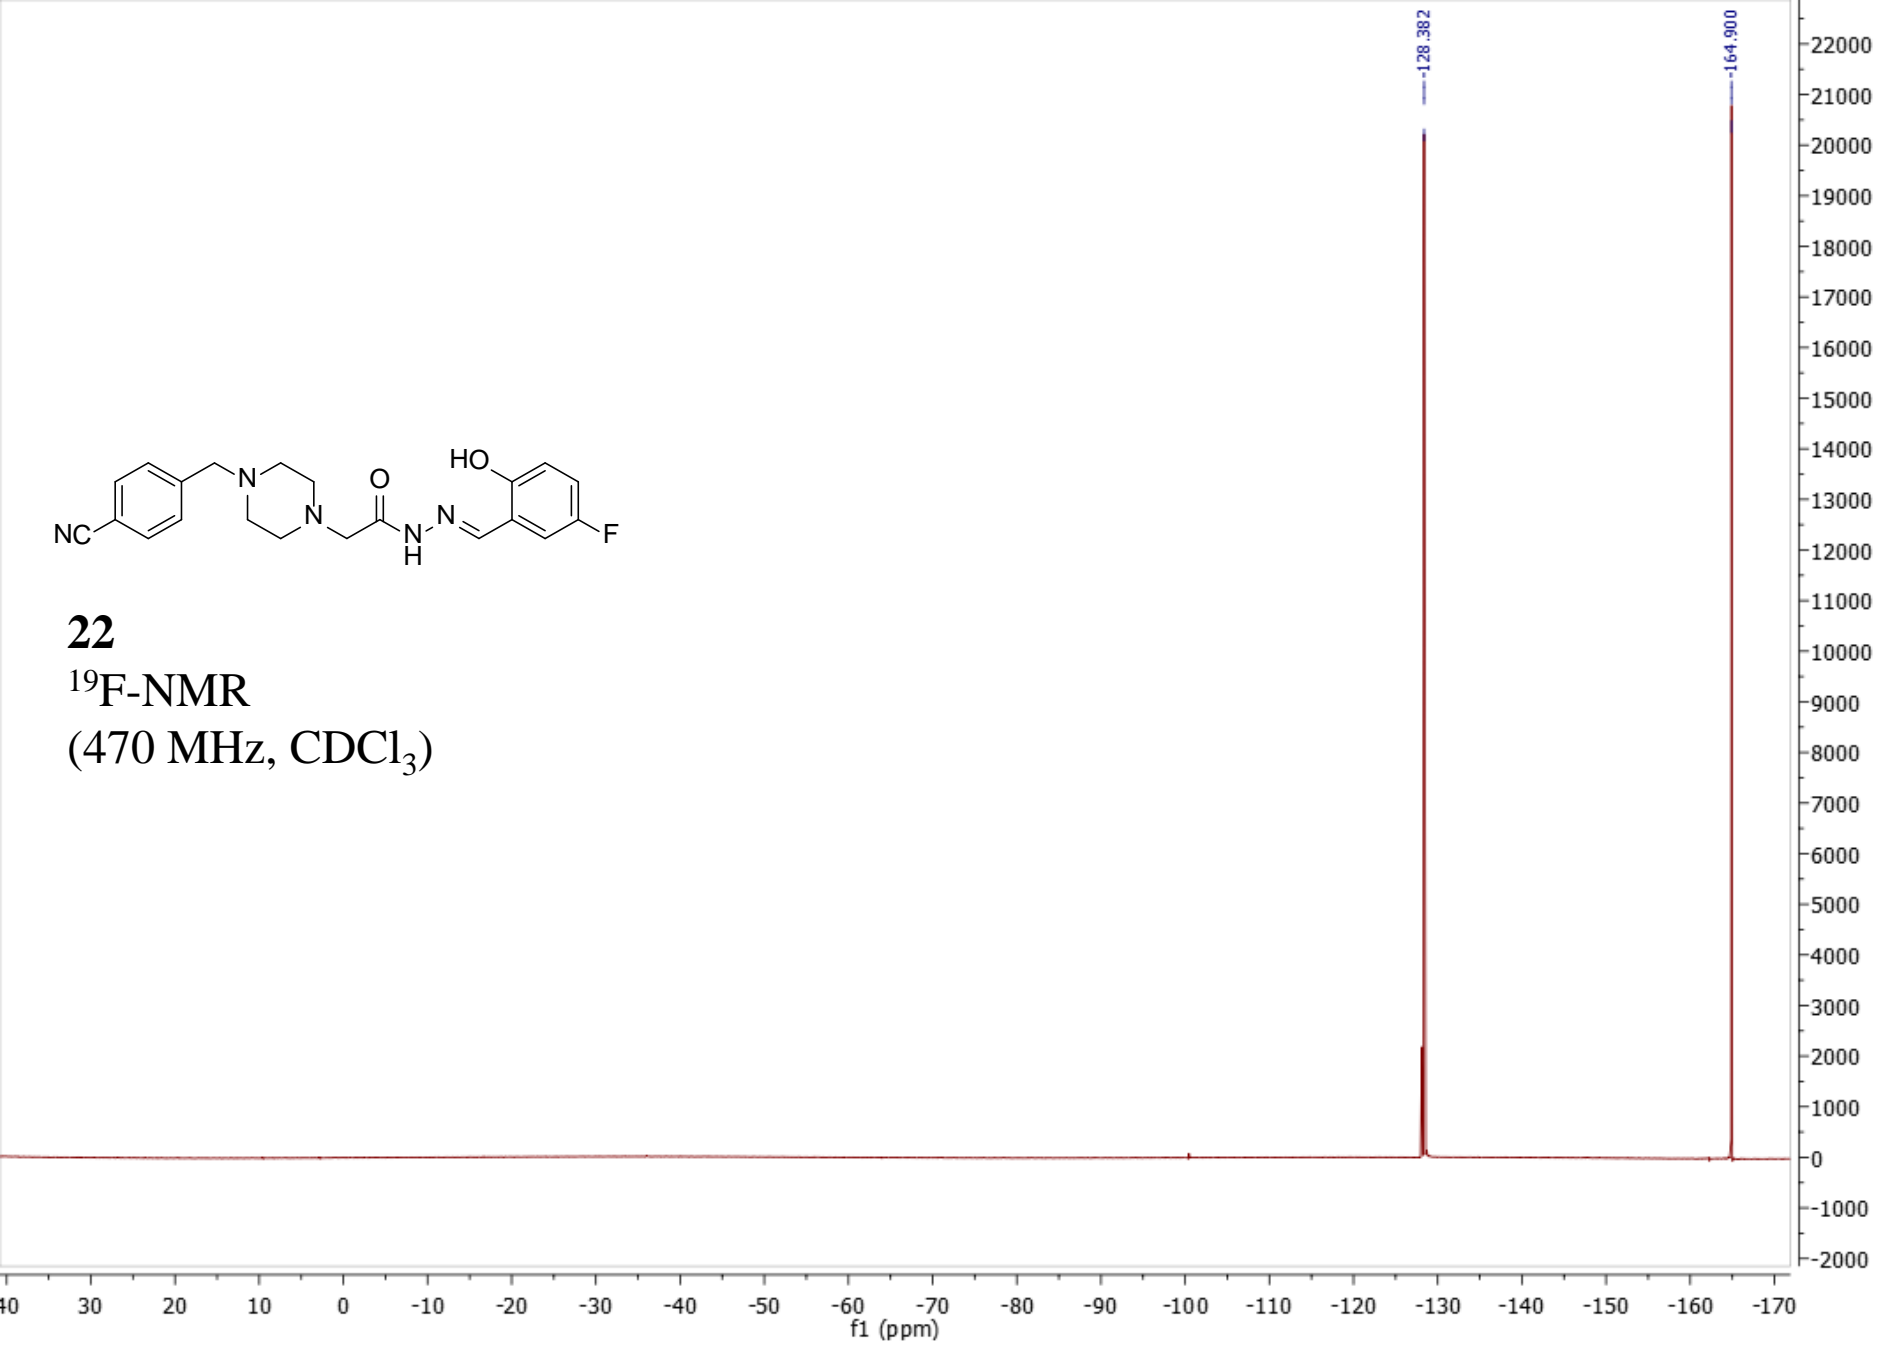

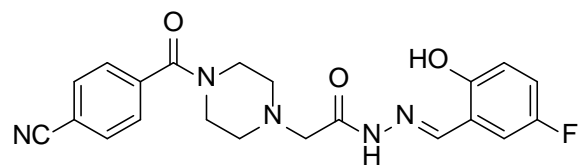

**23**  
<sup>1</sup>H-NMR  
 (500 MHz, CDCl<sub>3</sub>)

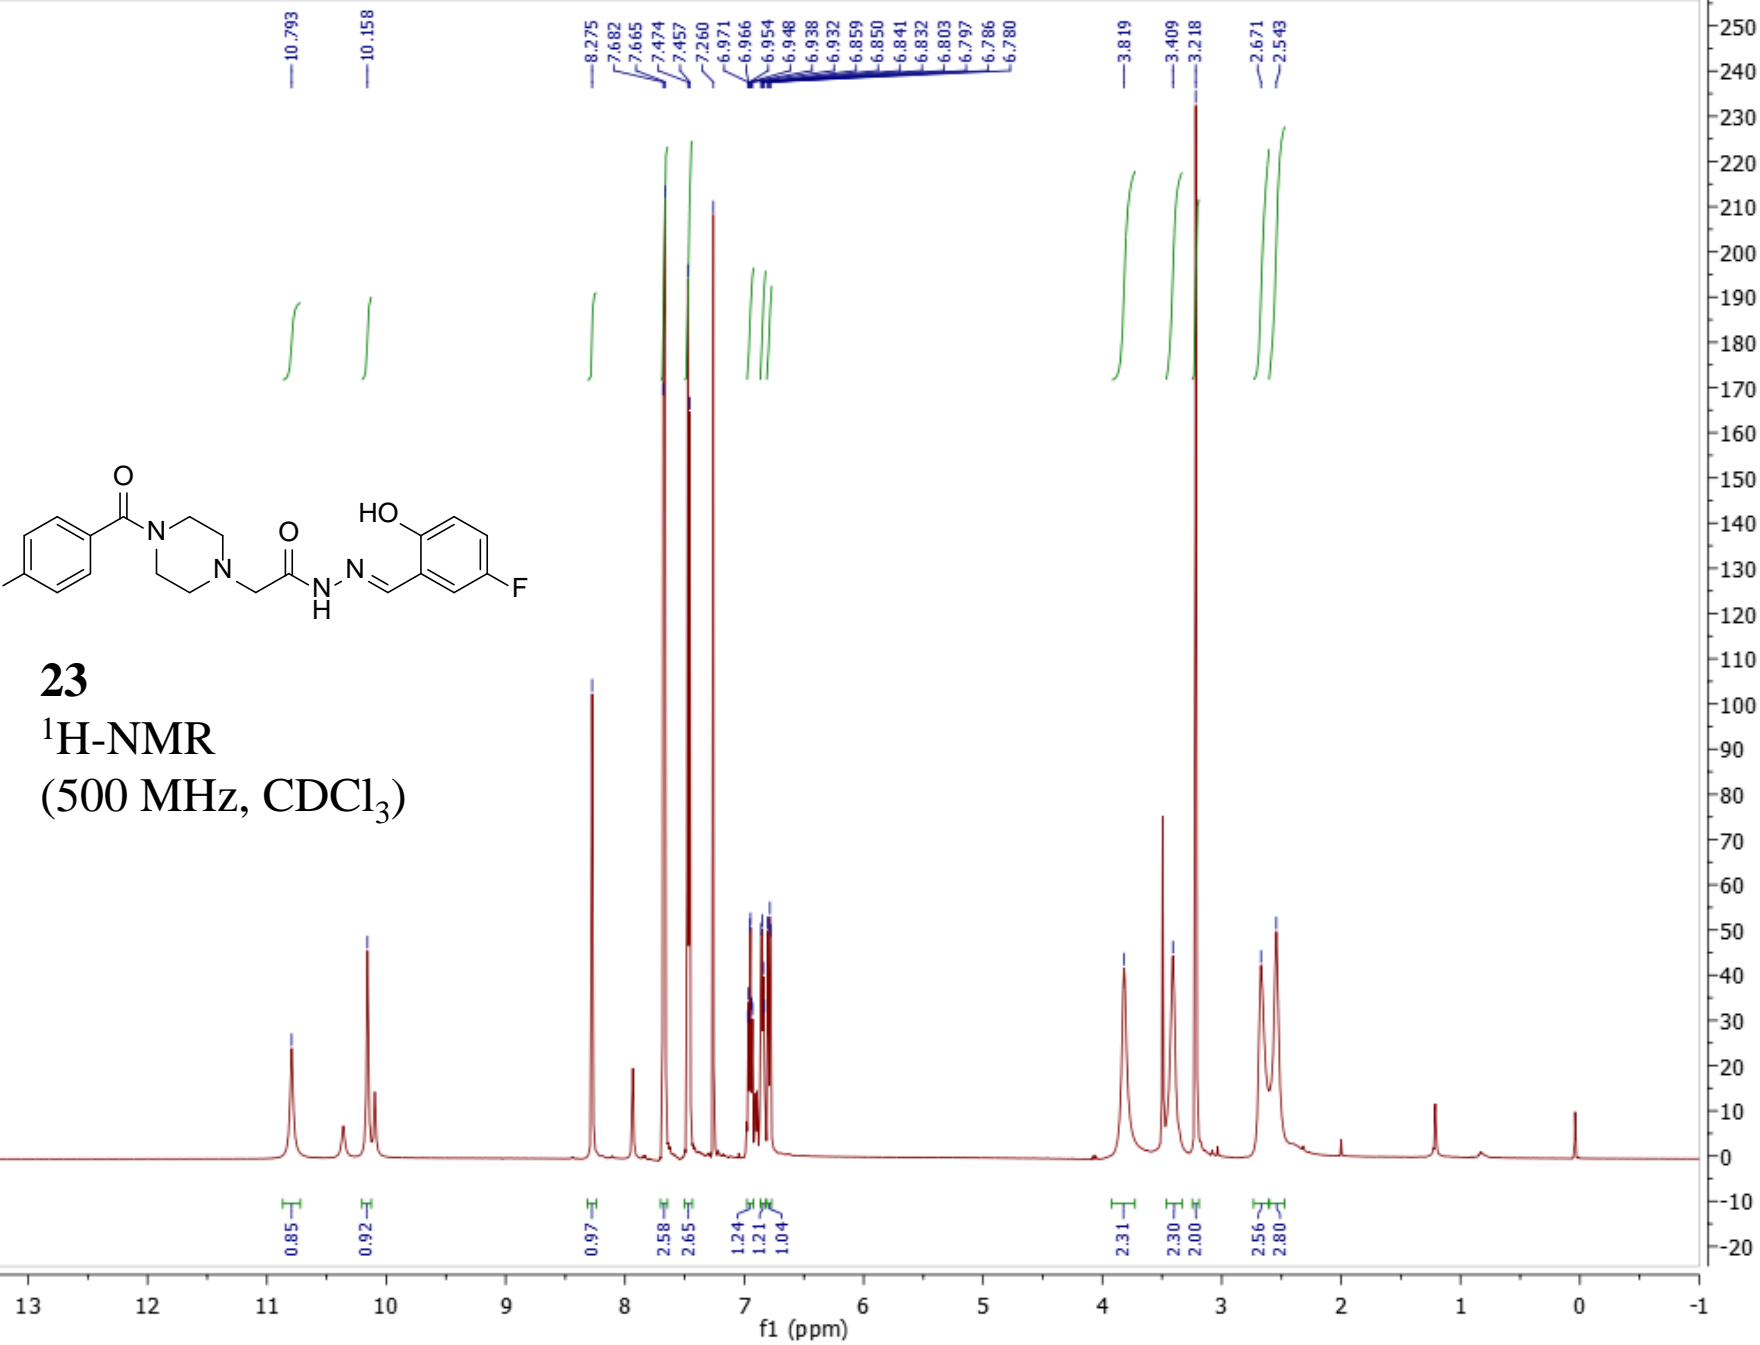

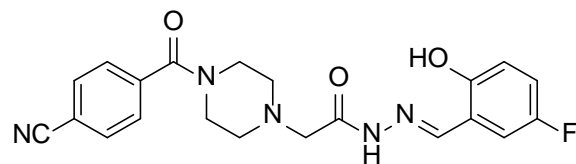

**23**

$^{13}\text{C}$ -NMR

(125 MHz,  $\text{CDCl}_3$ )

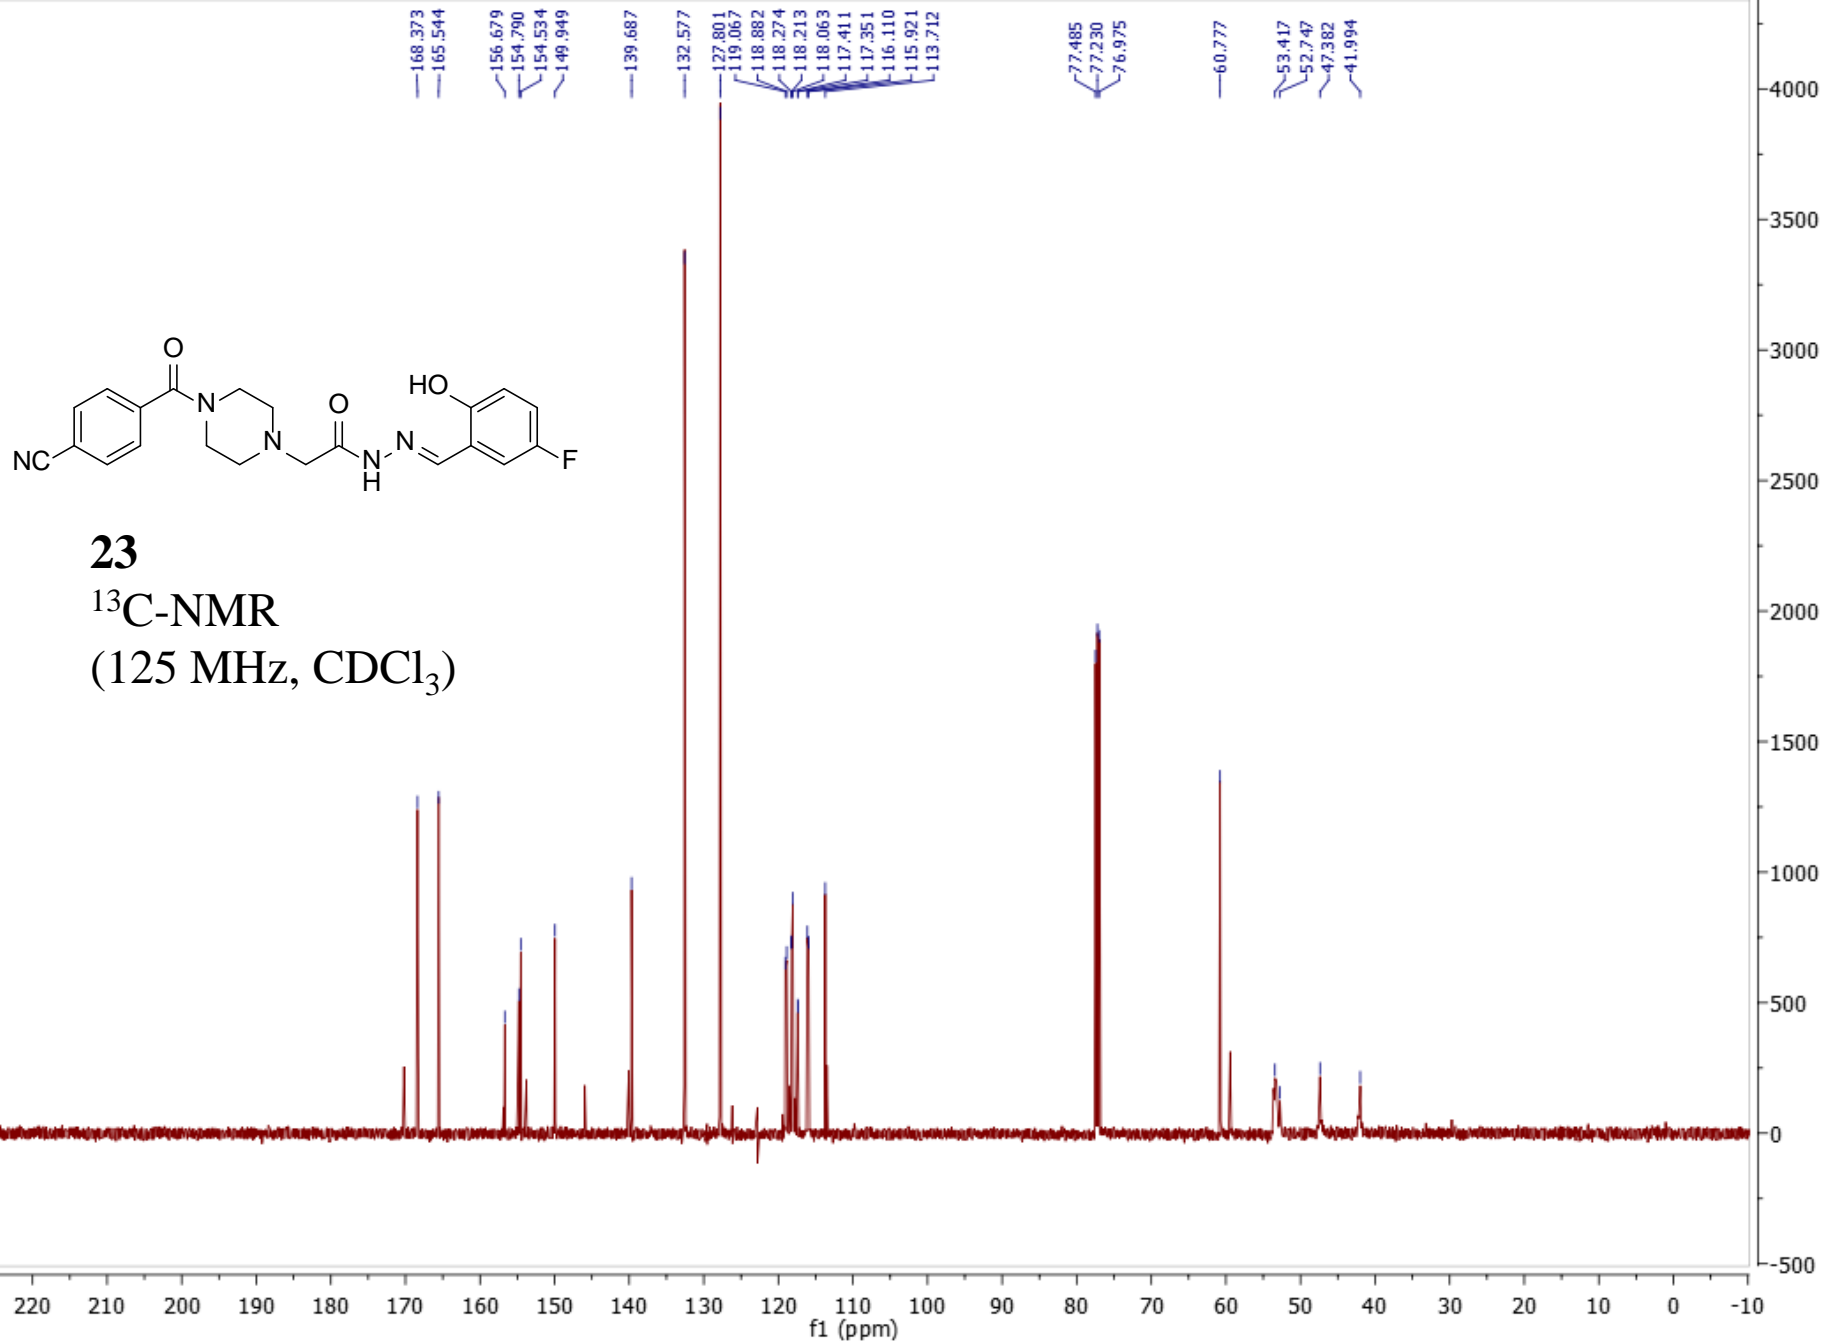

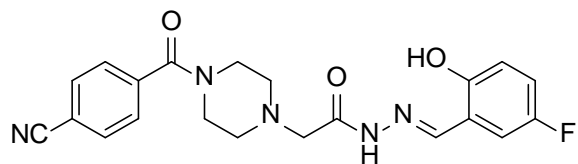

**23**

$^{19}\text{F}$ -NMR

(470 MHz,  $\text{CDCl}_3$ )

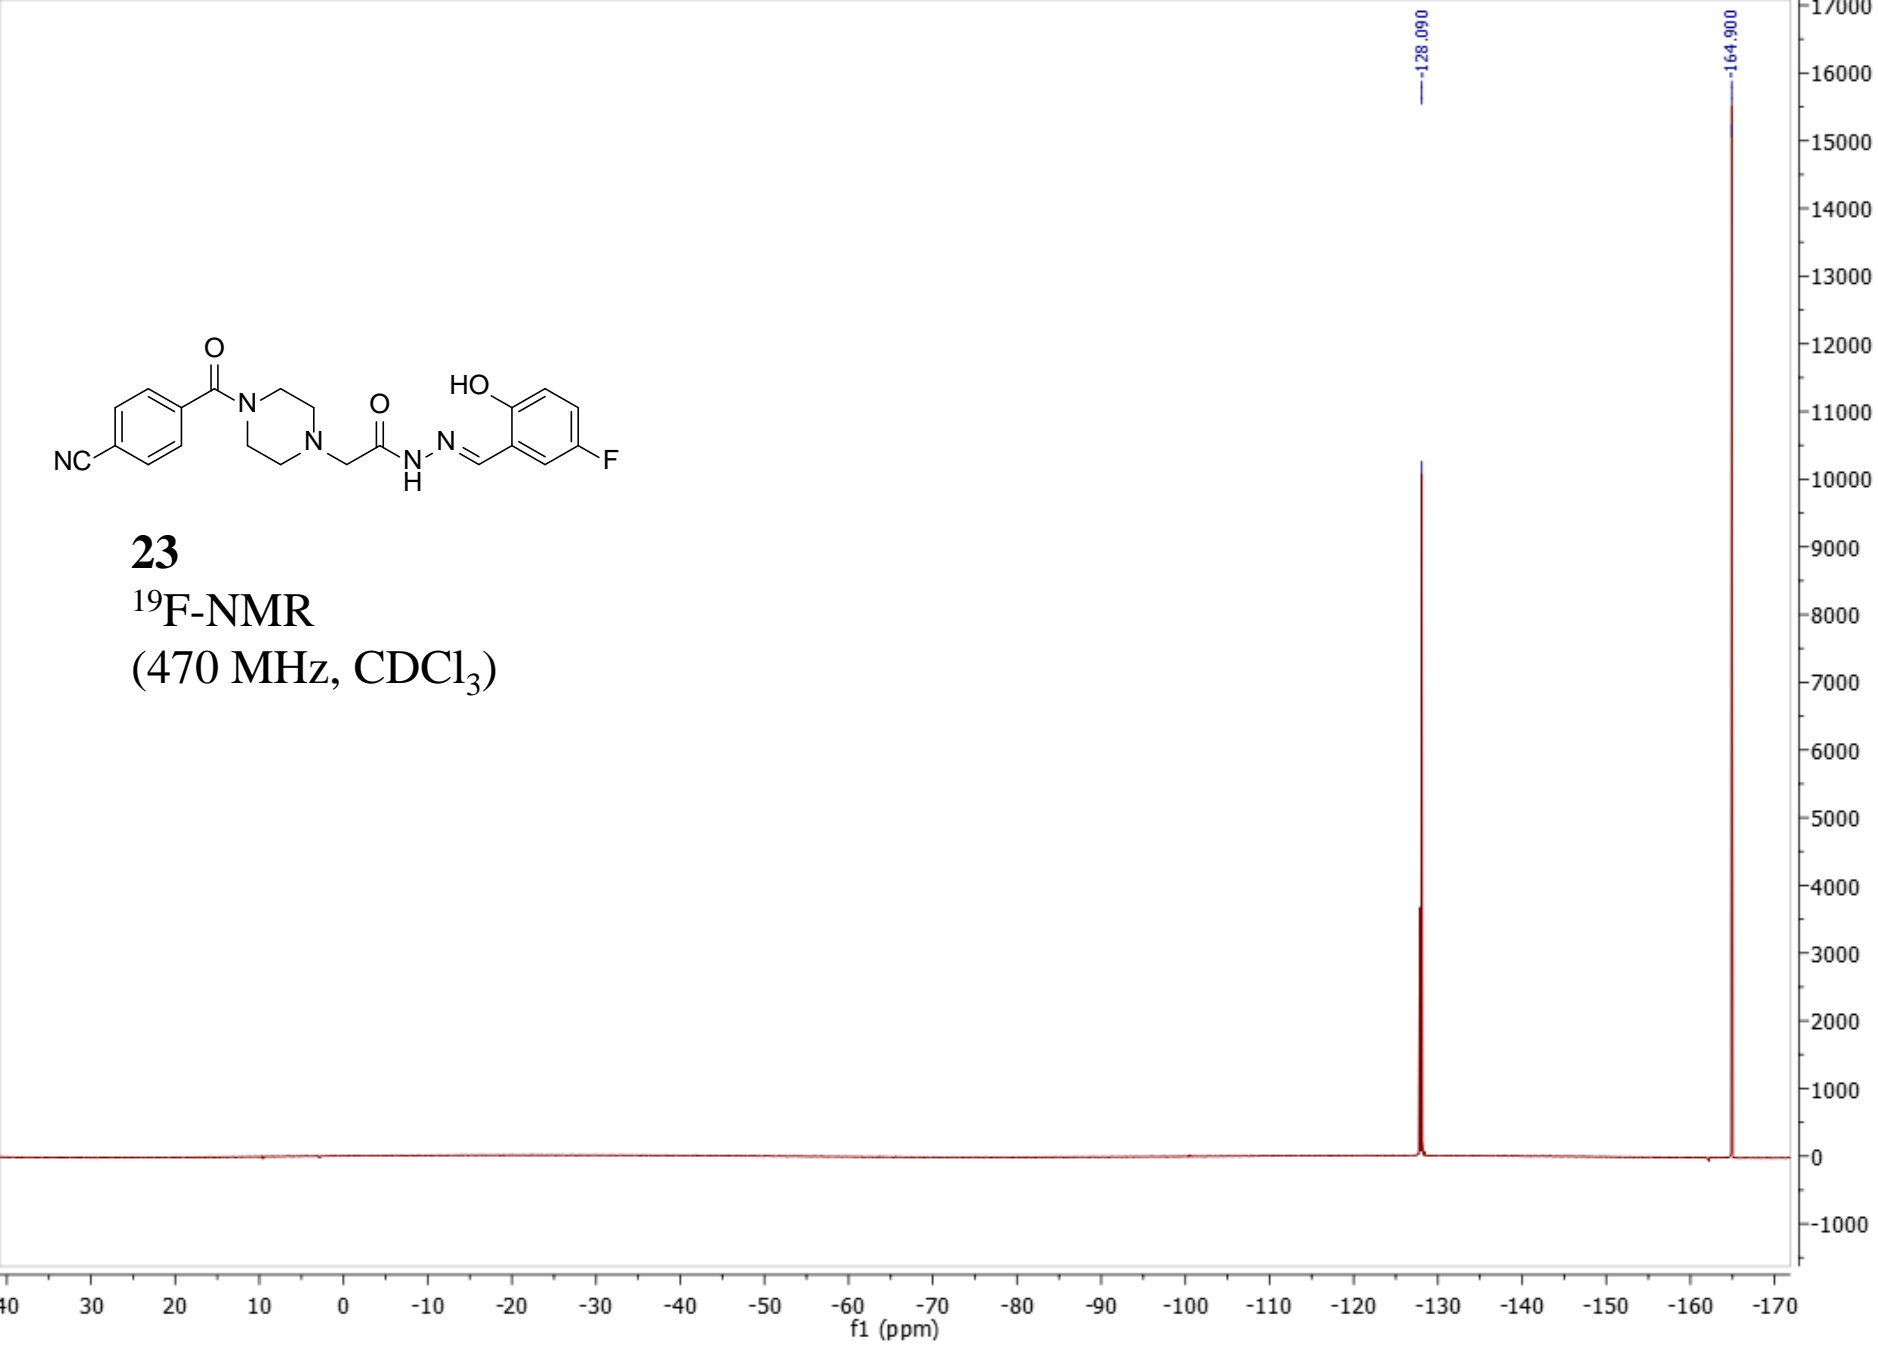

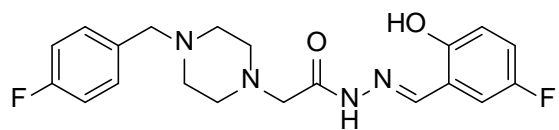

**24**  
<sup>1</sup>H-NMR  
 (500 MHz, CDCl<sub>3</sub>)

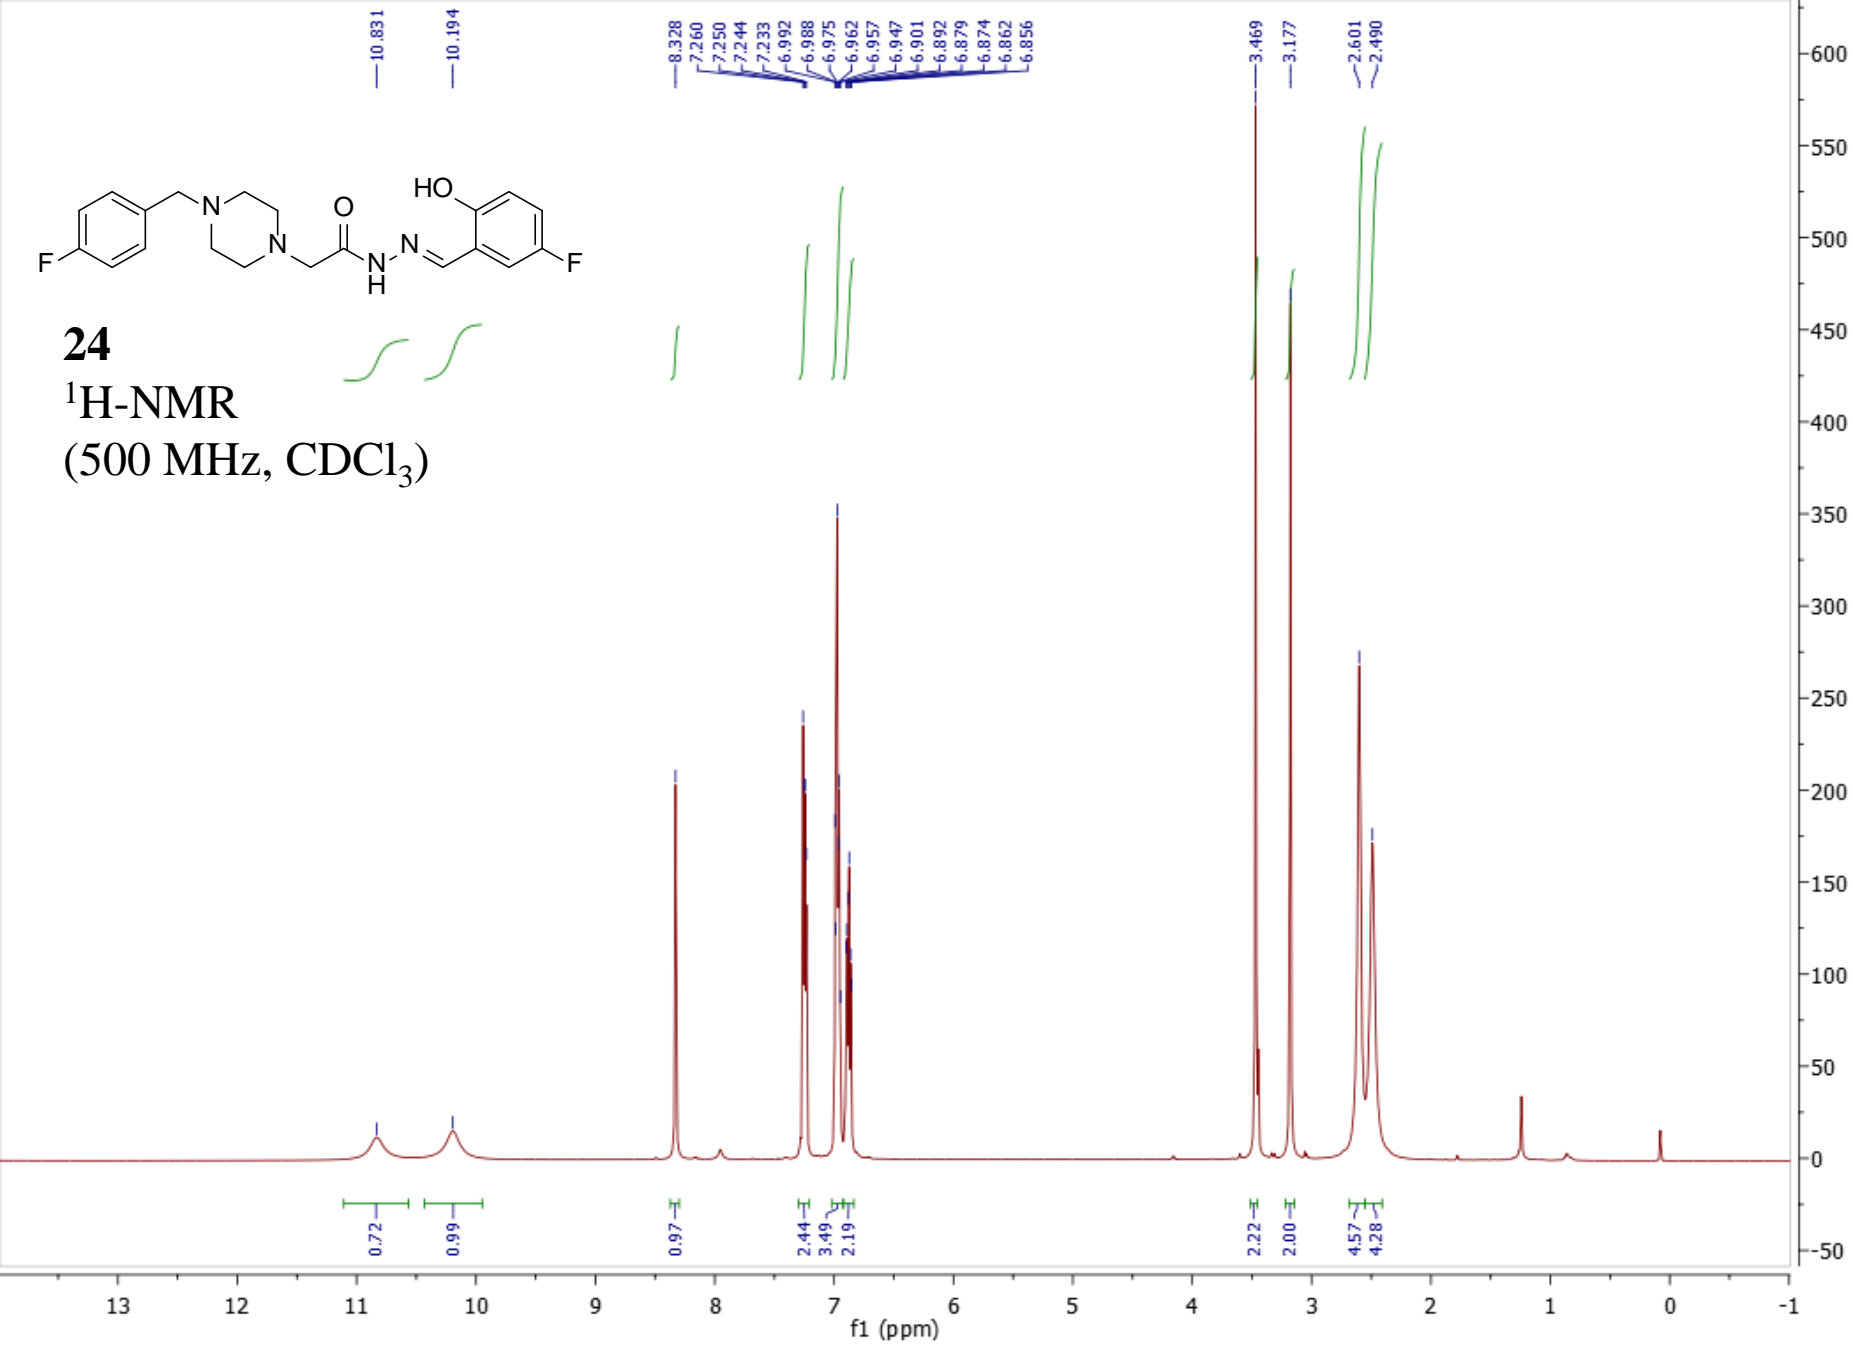



**24**  
<sup>13</sup>C-NMR  
 (125 MHz, CDCl<sub>3</sub>)

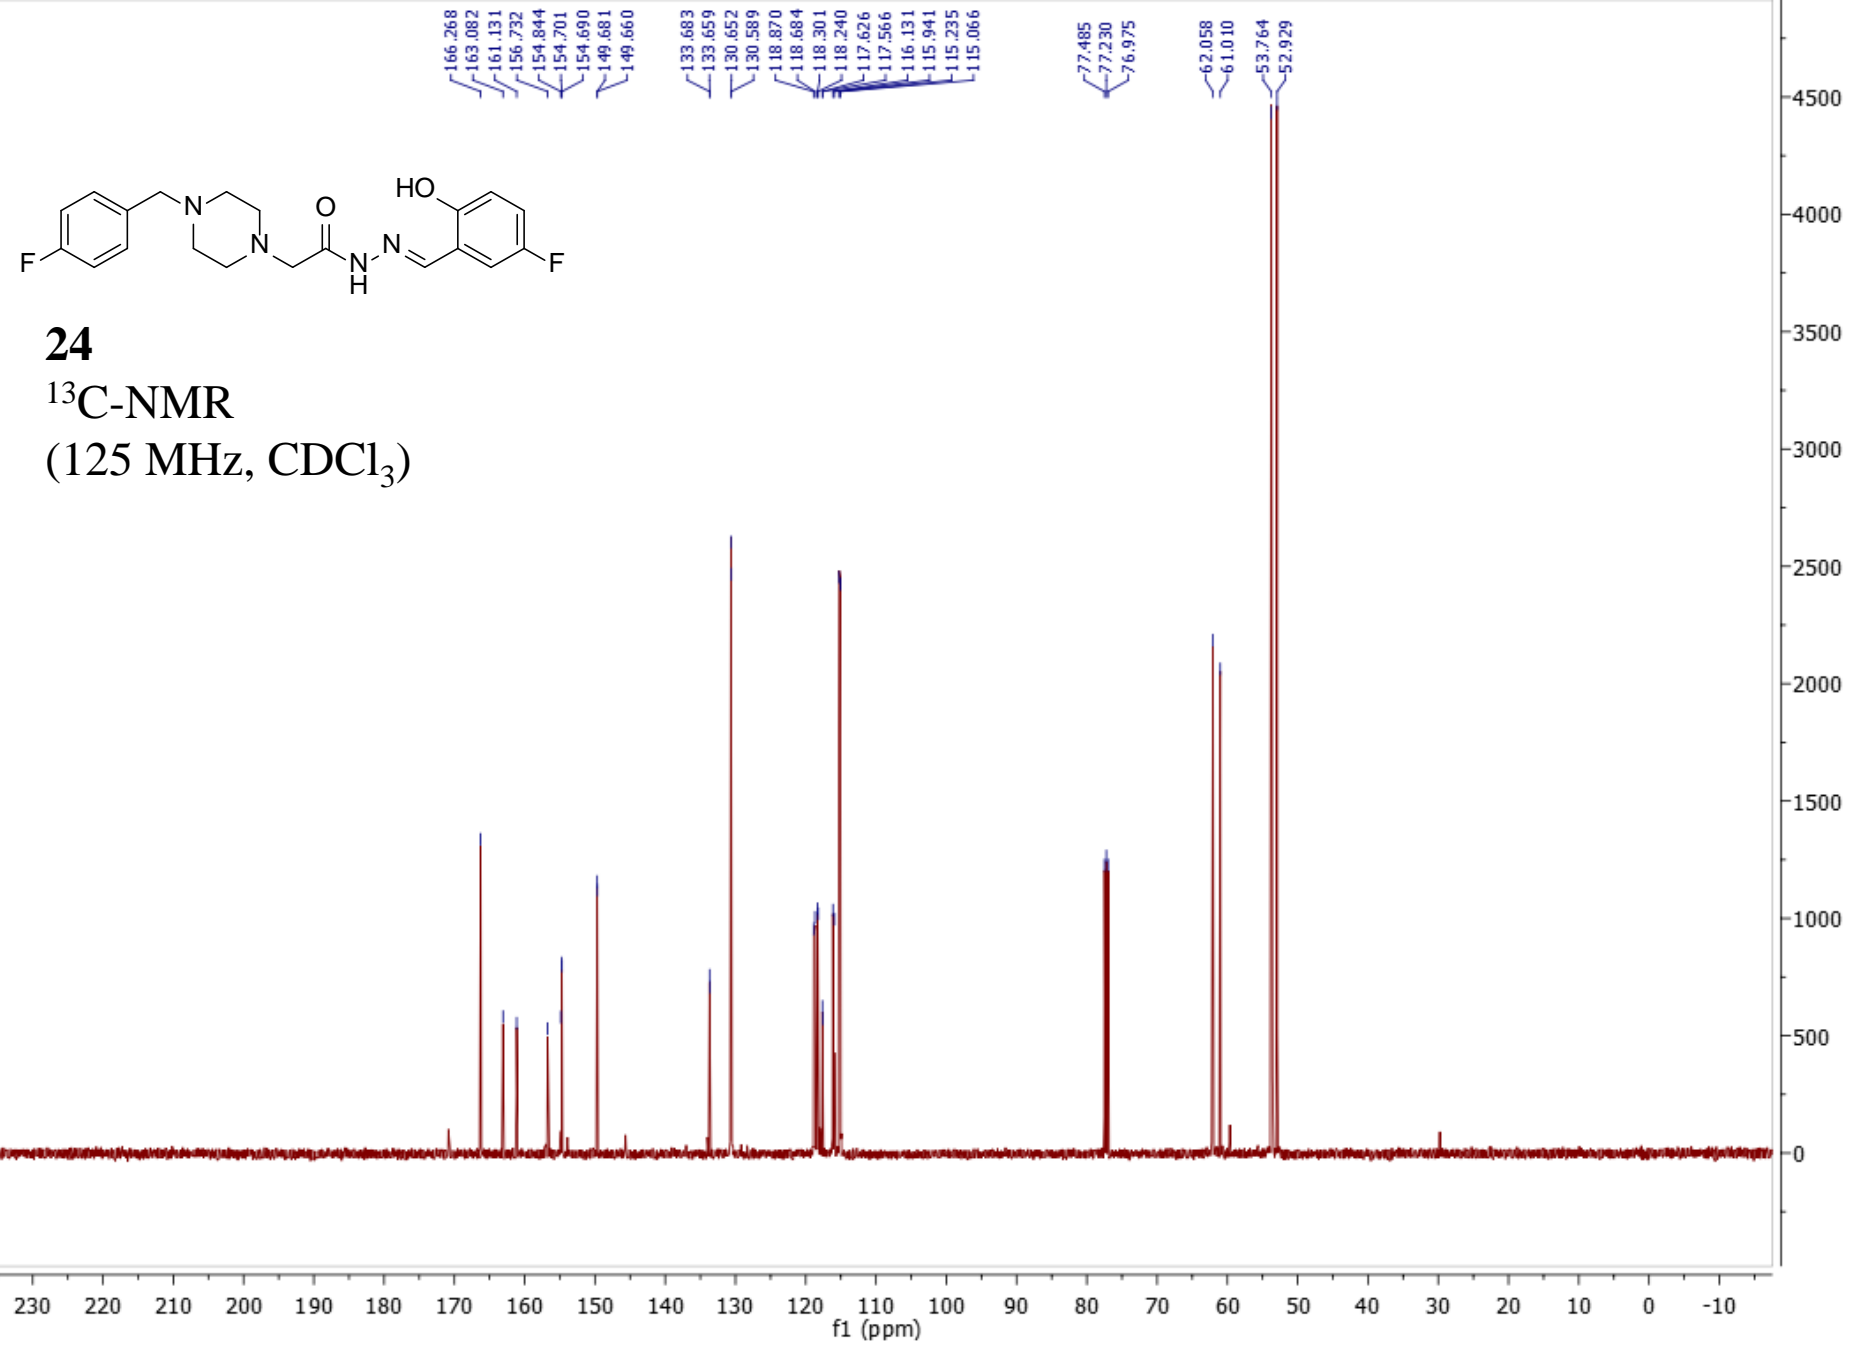

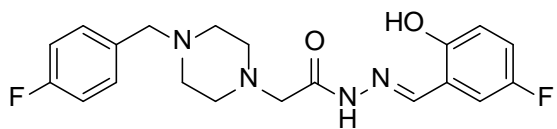

**24**

<sup>19</sup>F-NMR

(470 MHz, CDCl<sub>3</sub>)

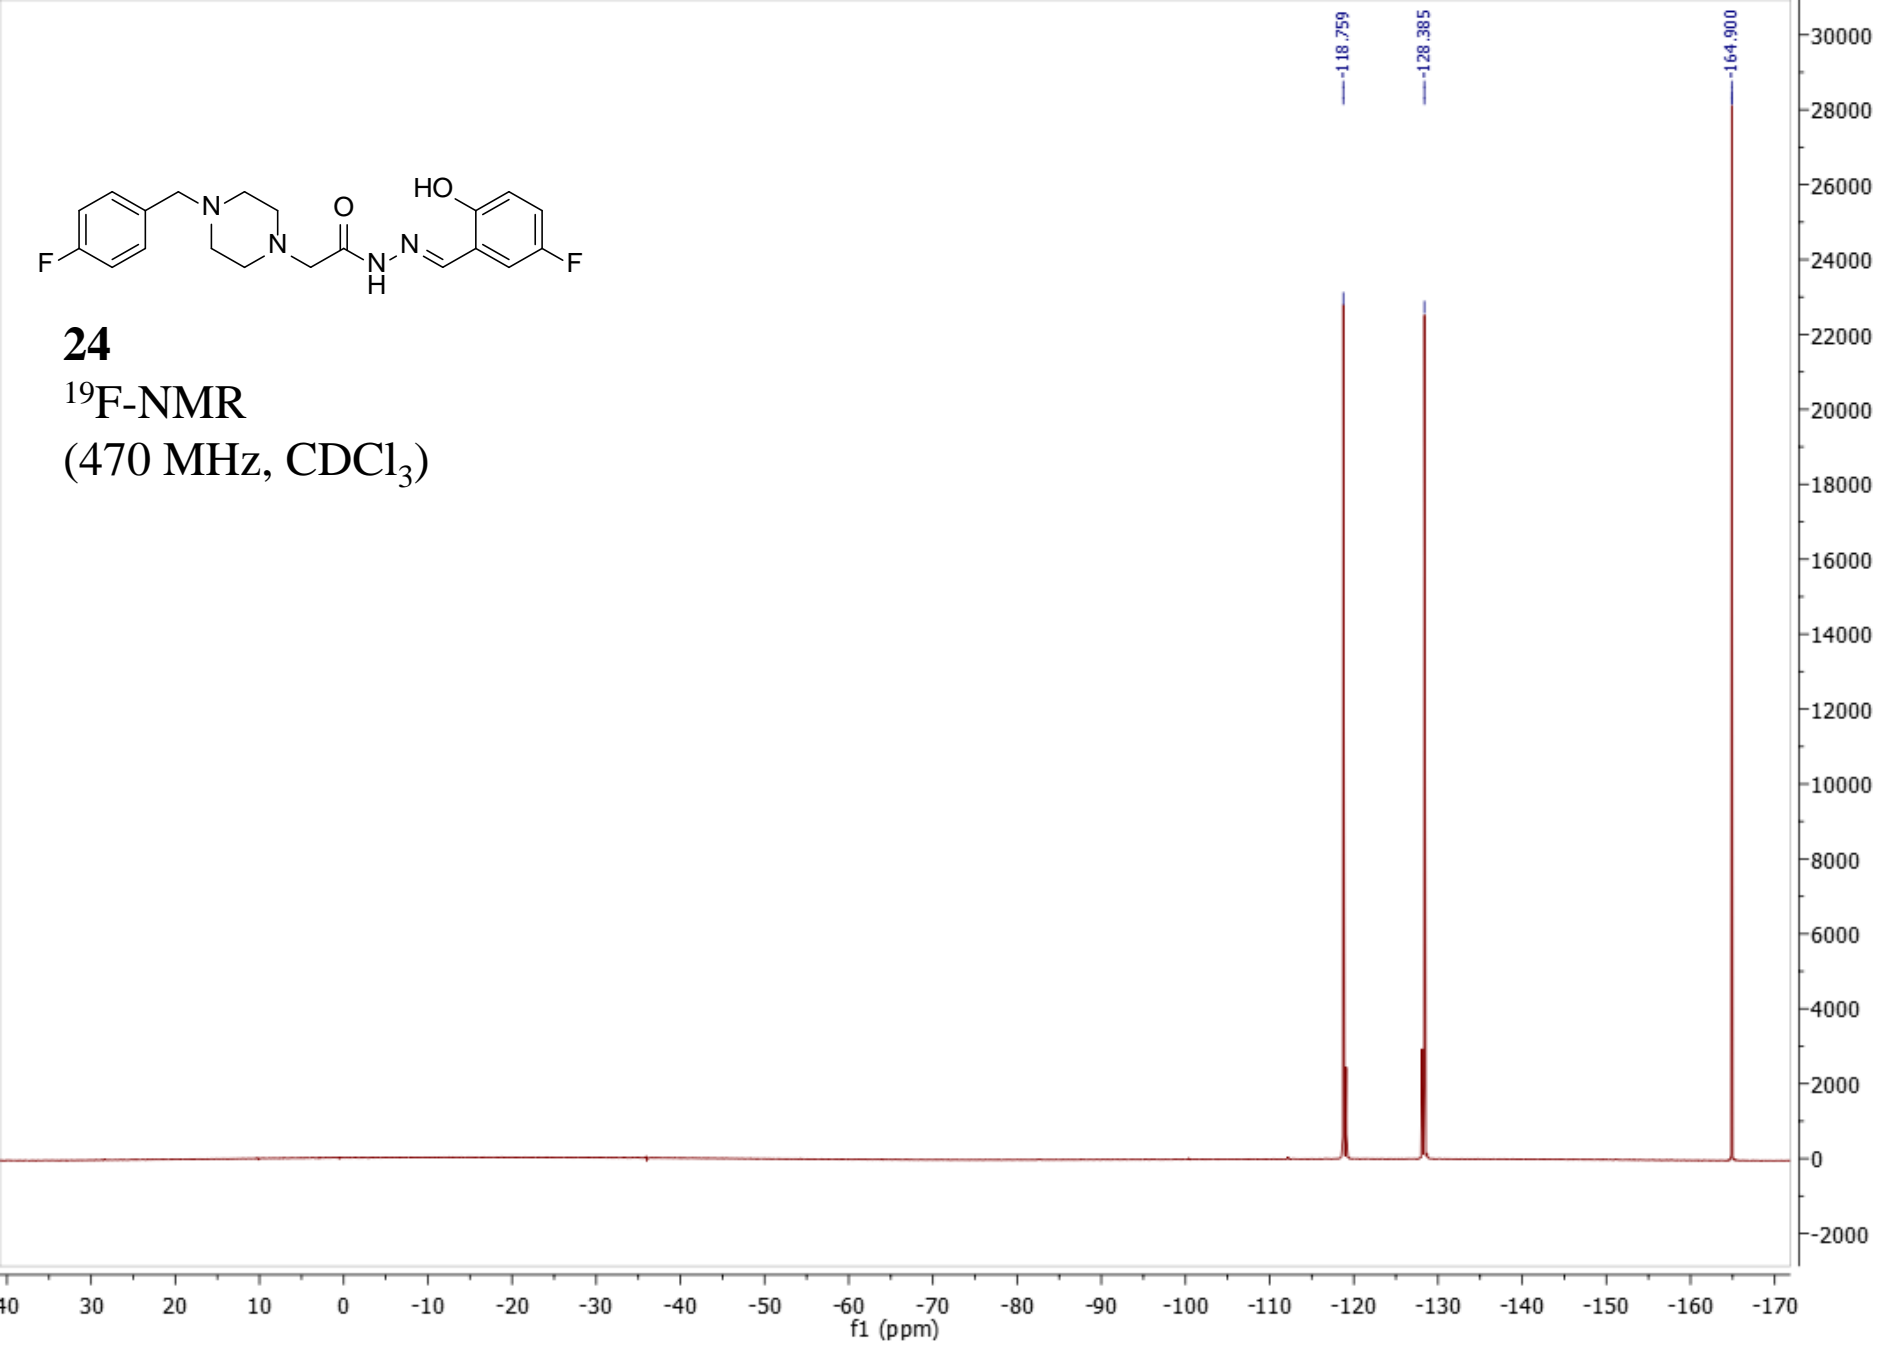



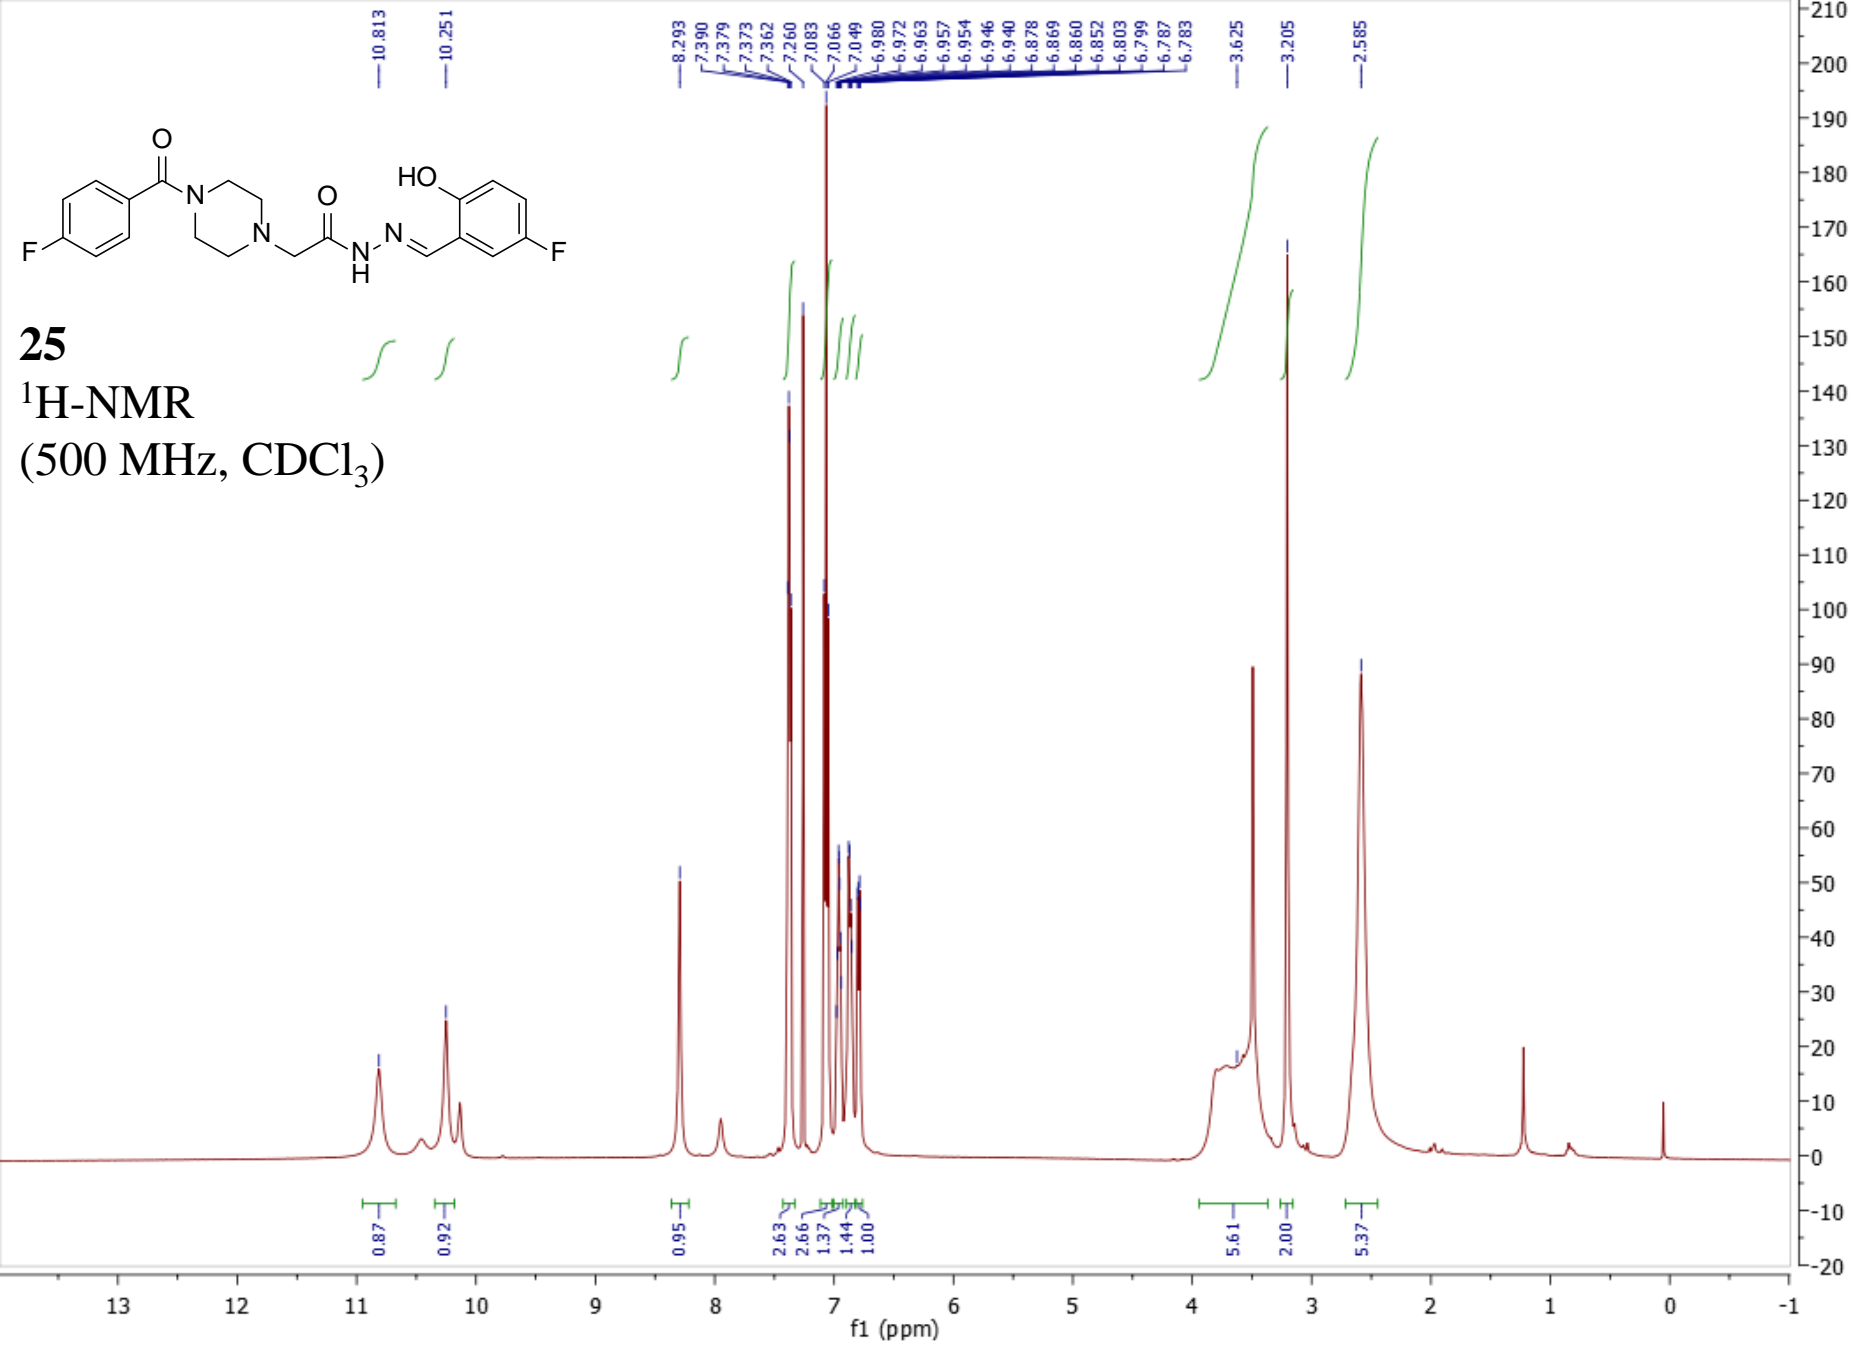

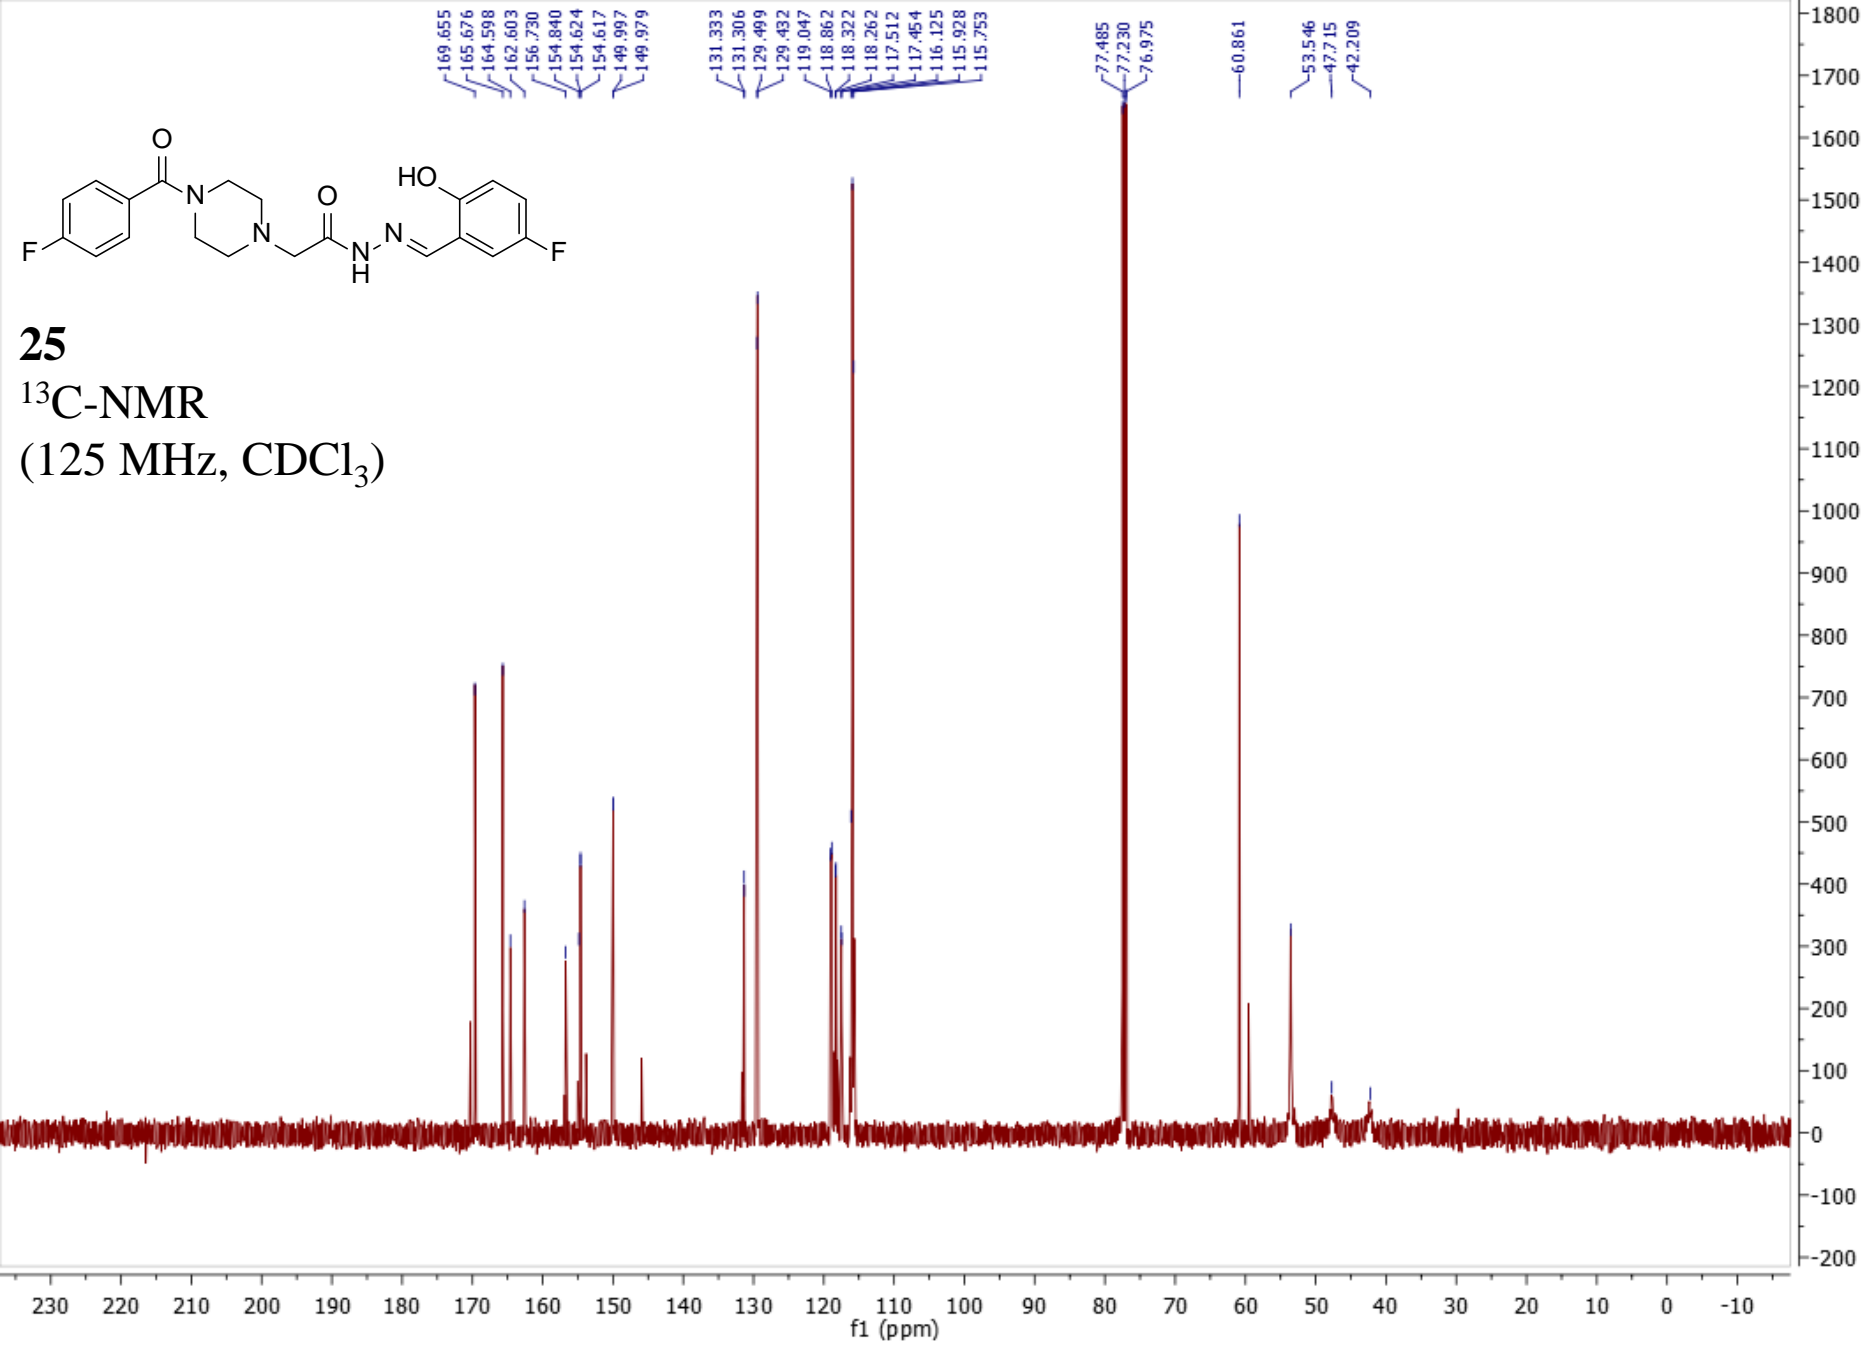

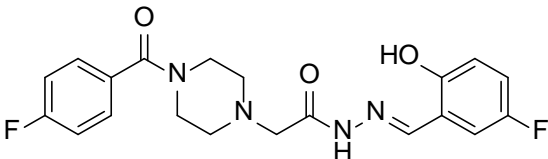

**25**  
<sup>19</sup>F-NMR  
(470 MHz, CDCl<sub>3</sub>)

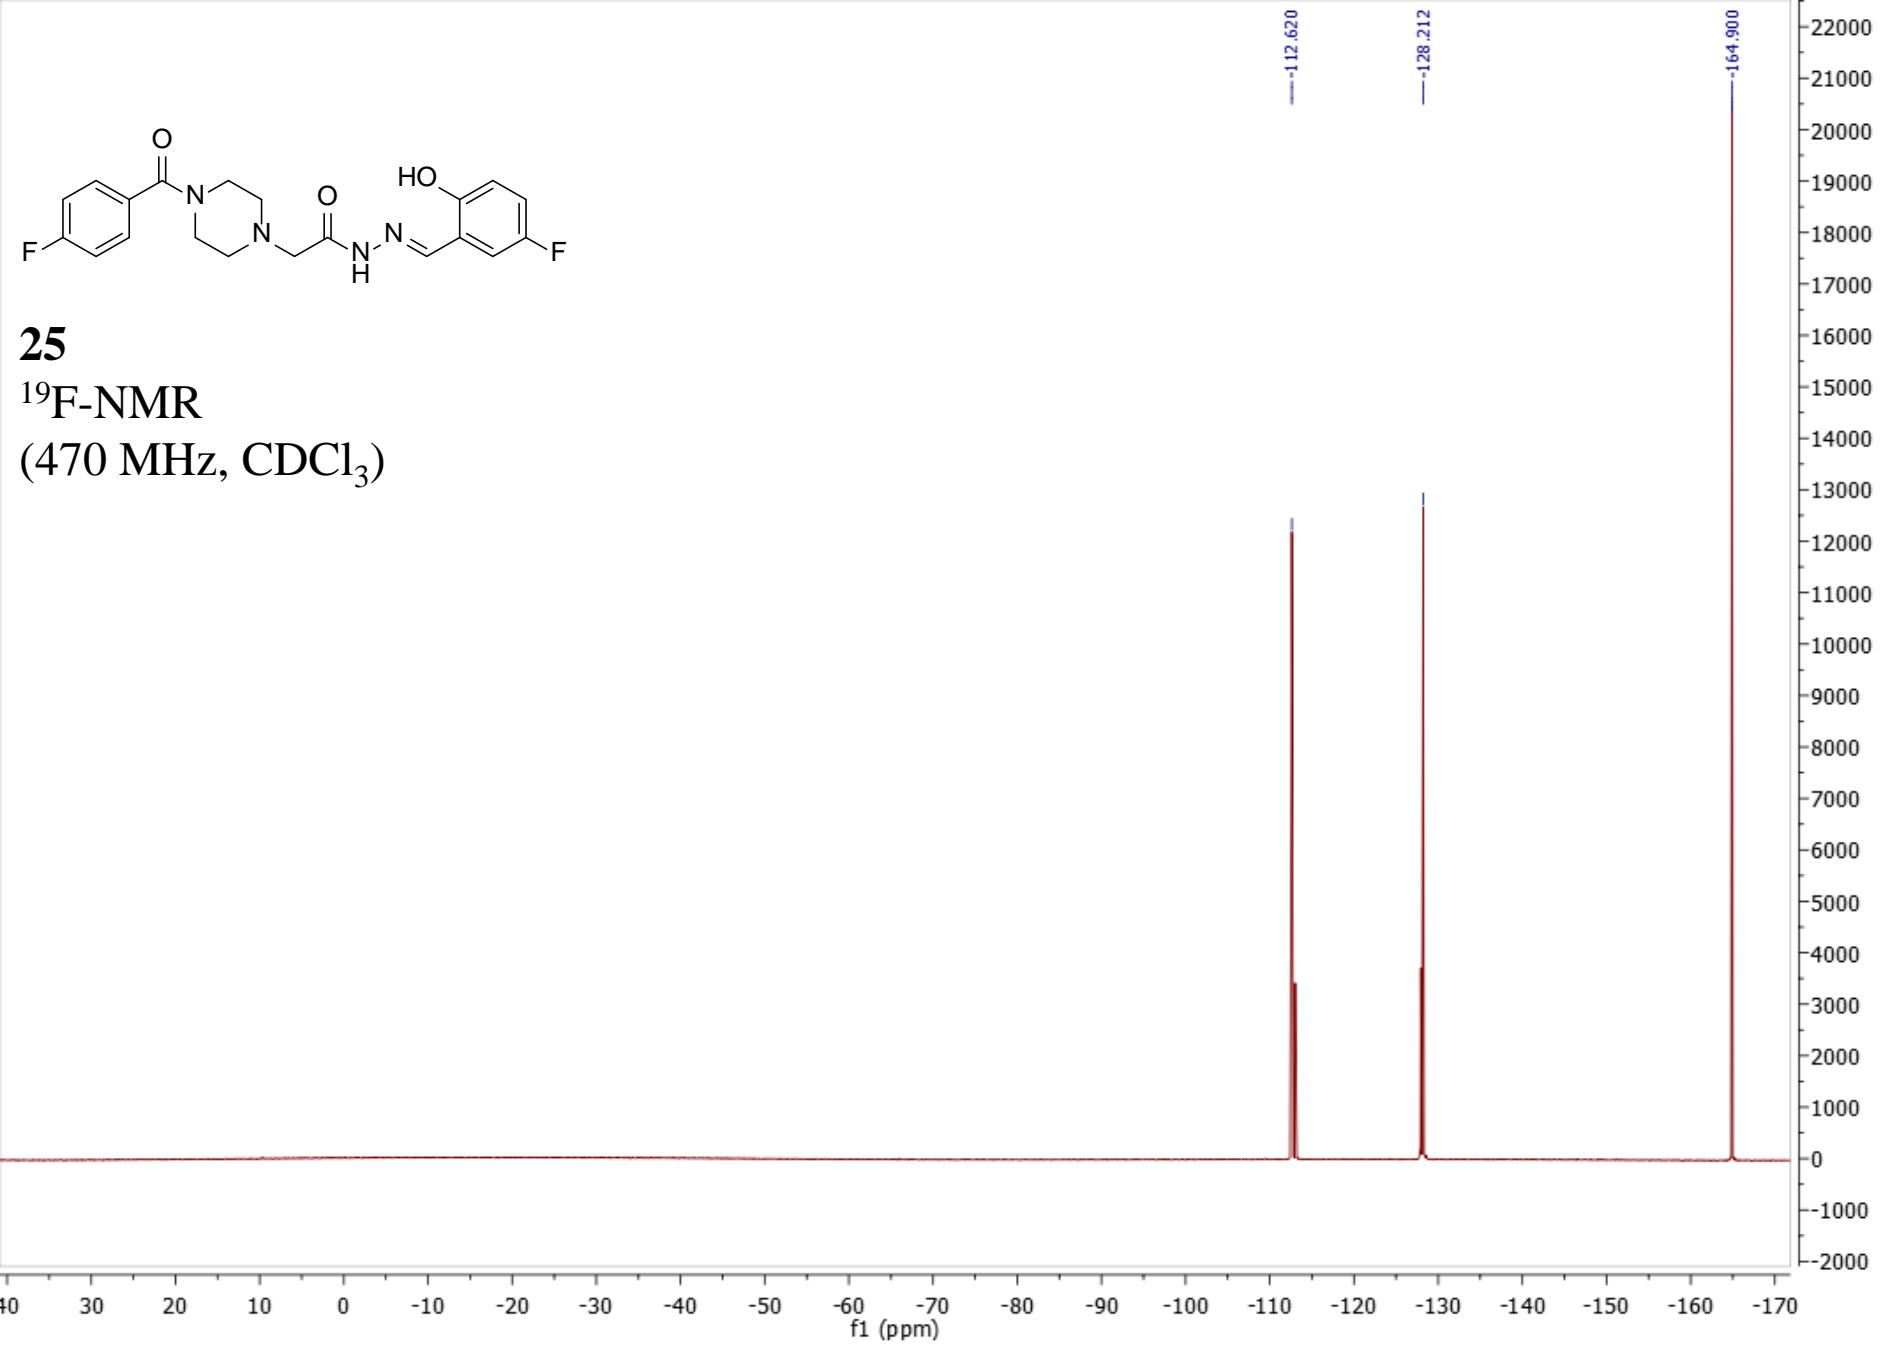

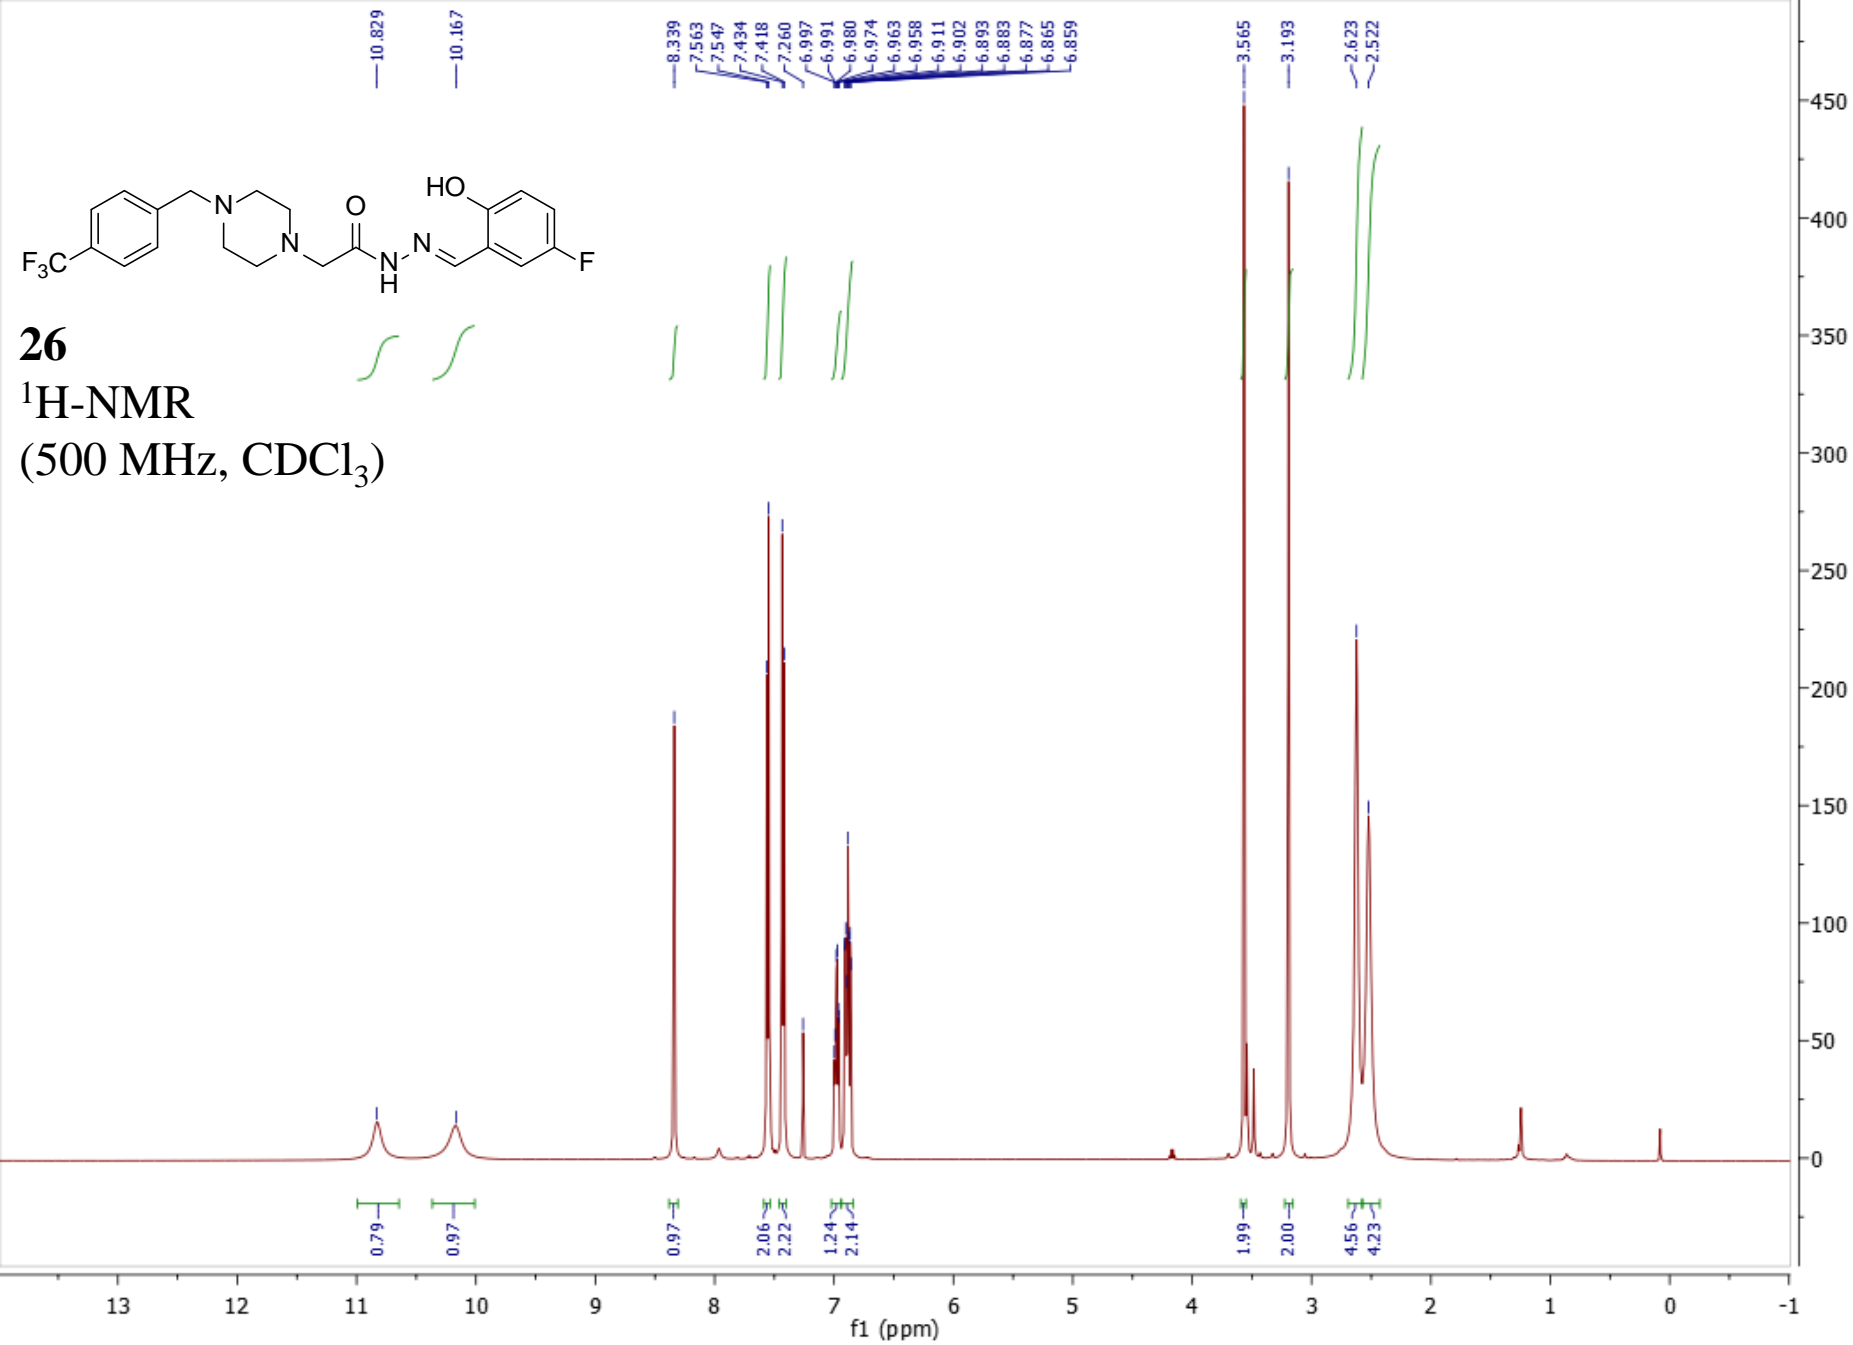

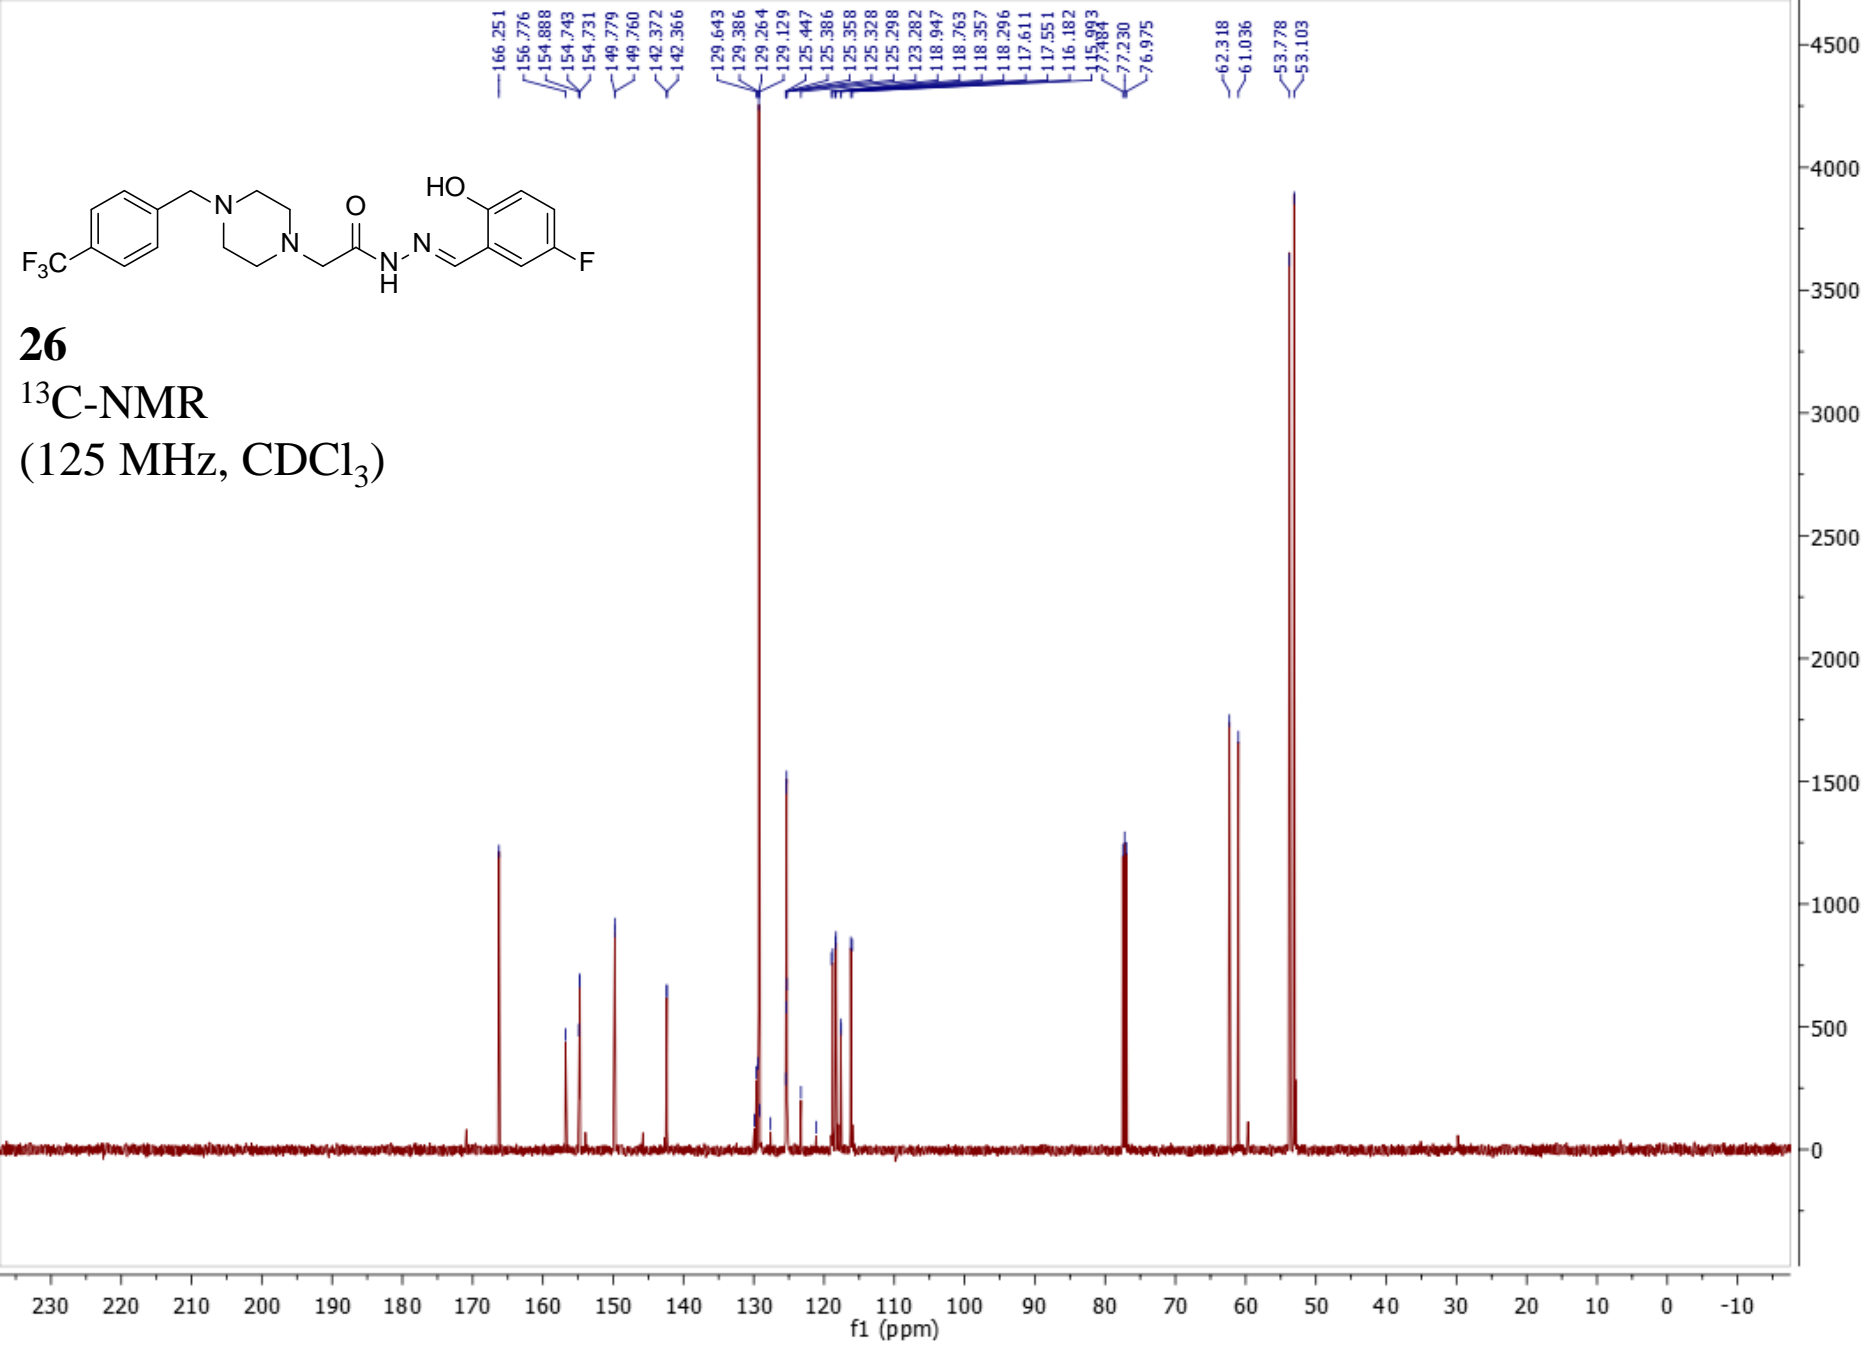

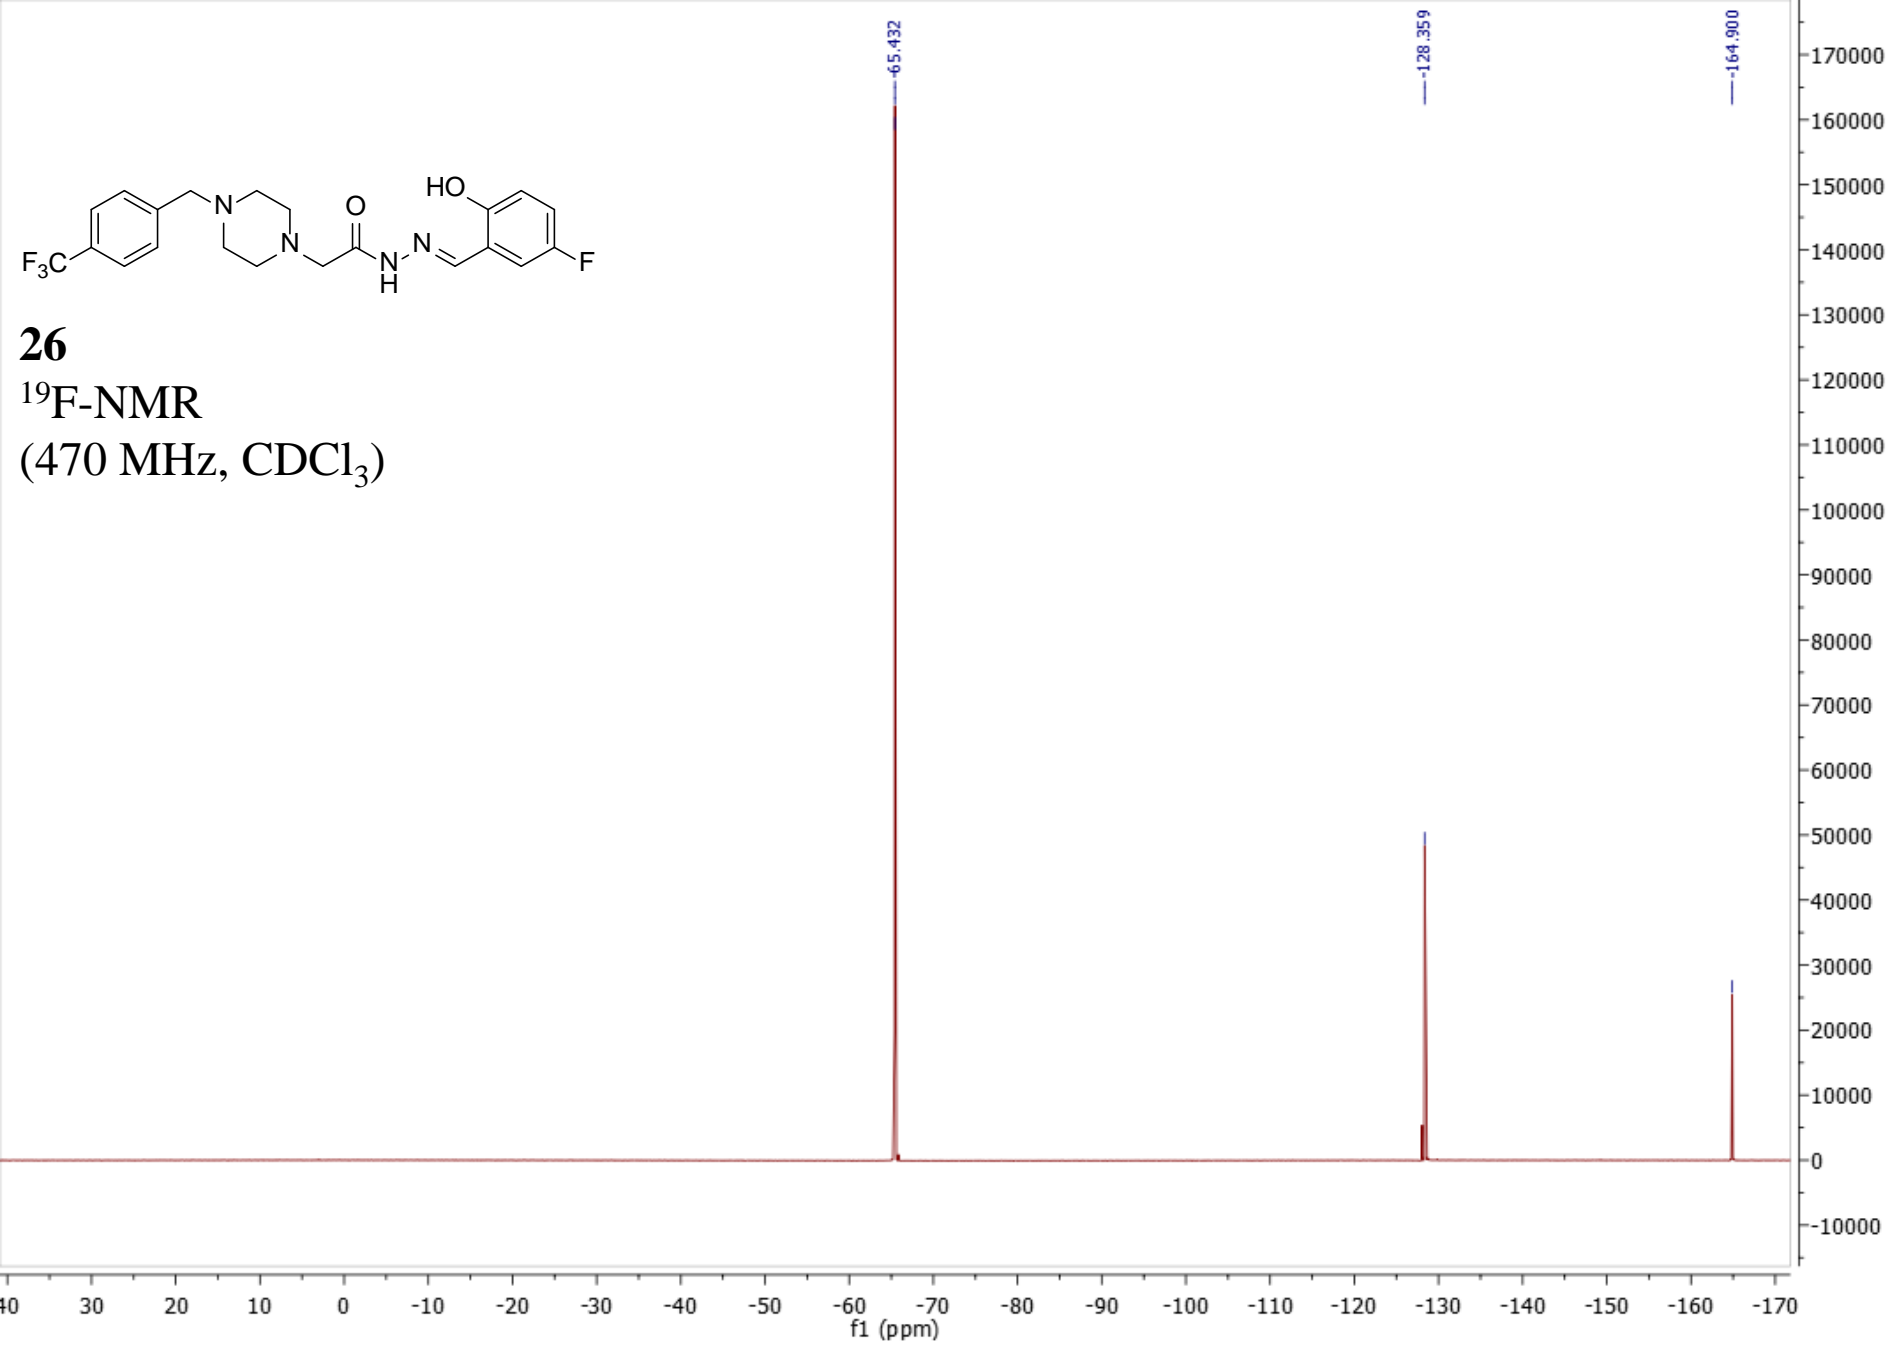

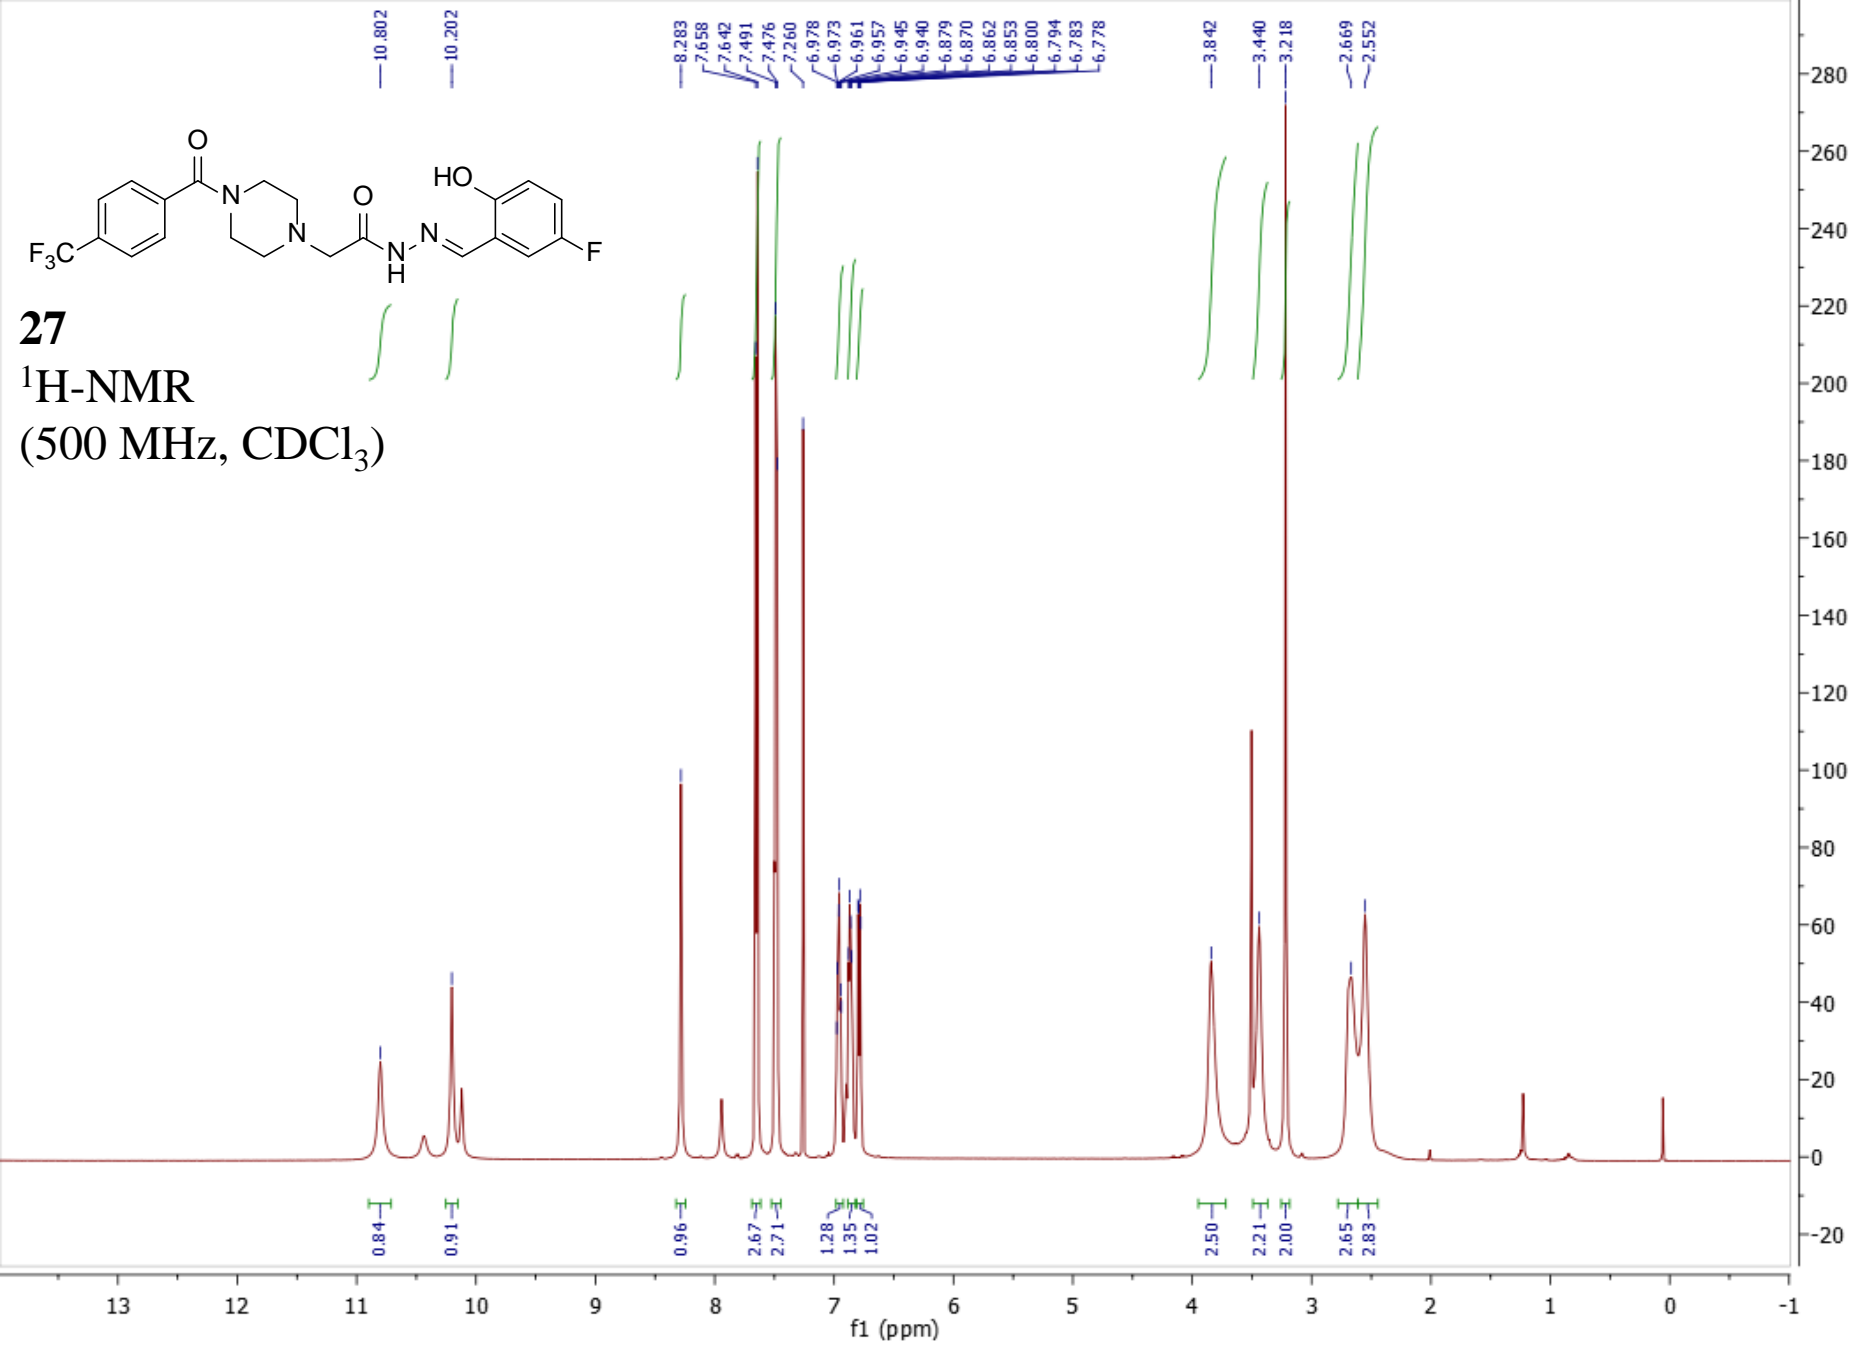

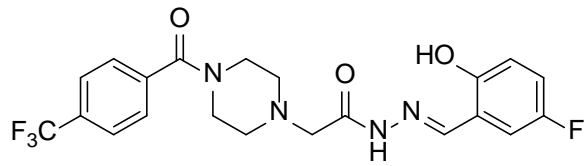

**27**  
<sup>13</sup>C-NMR  
(125 MHz, CDCl<sub>3</sub>)

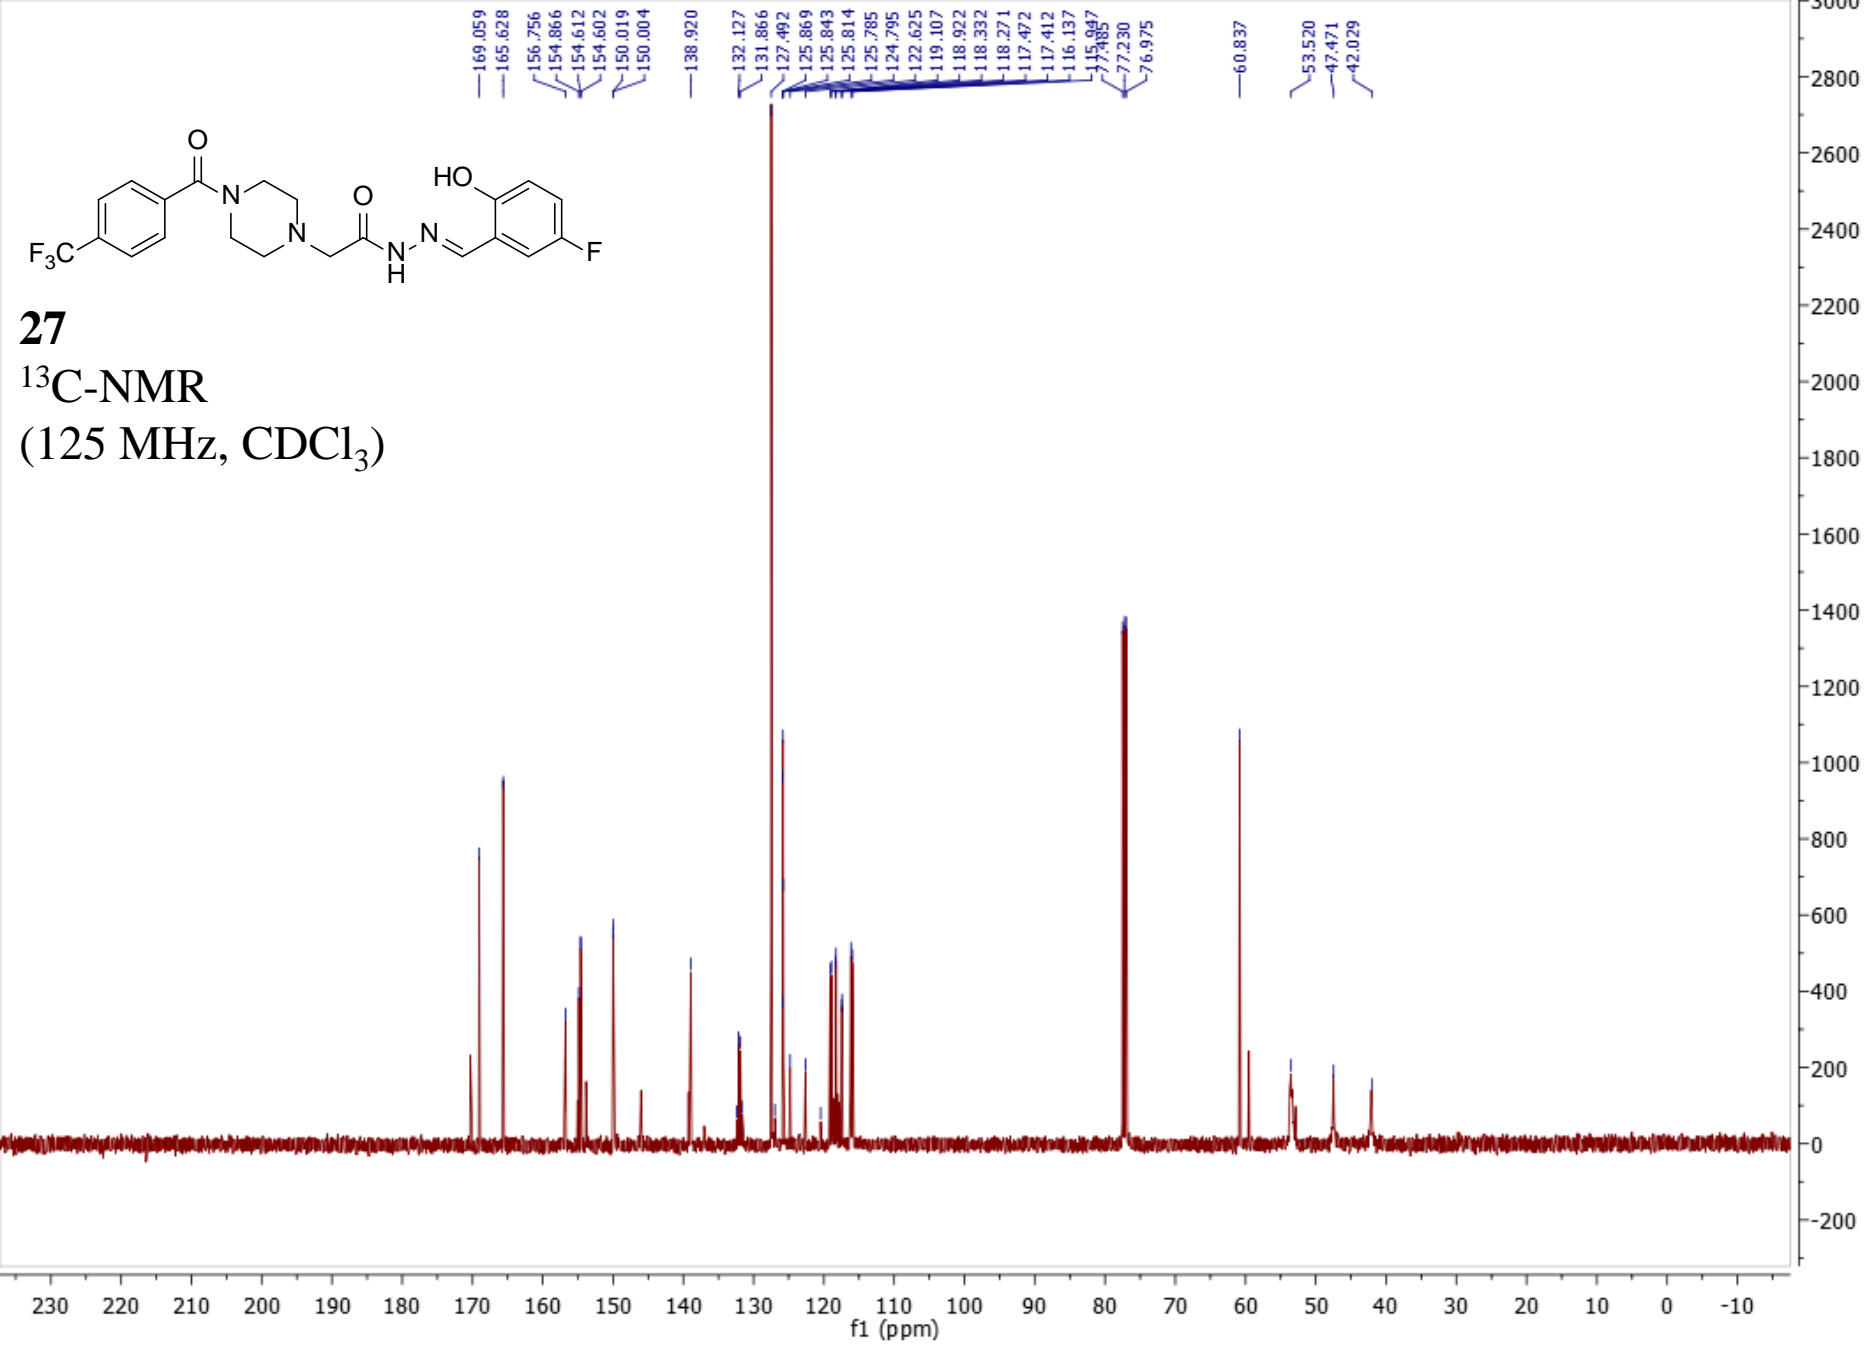





**27**  
<sup>19</sup>F-NMR  
(470 MHz, CDCl<sub>3</sub>)

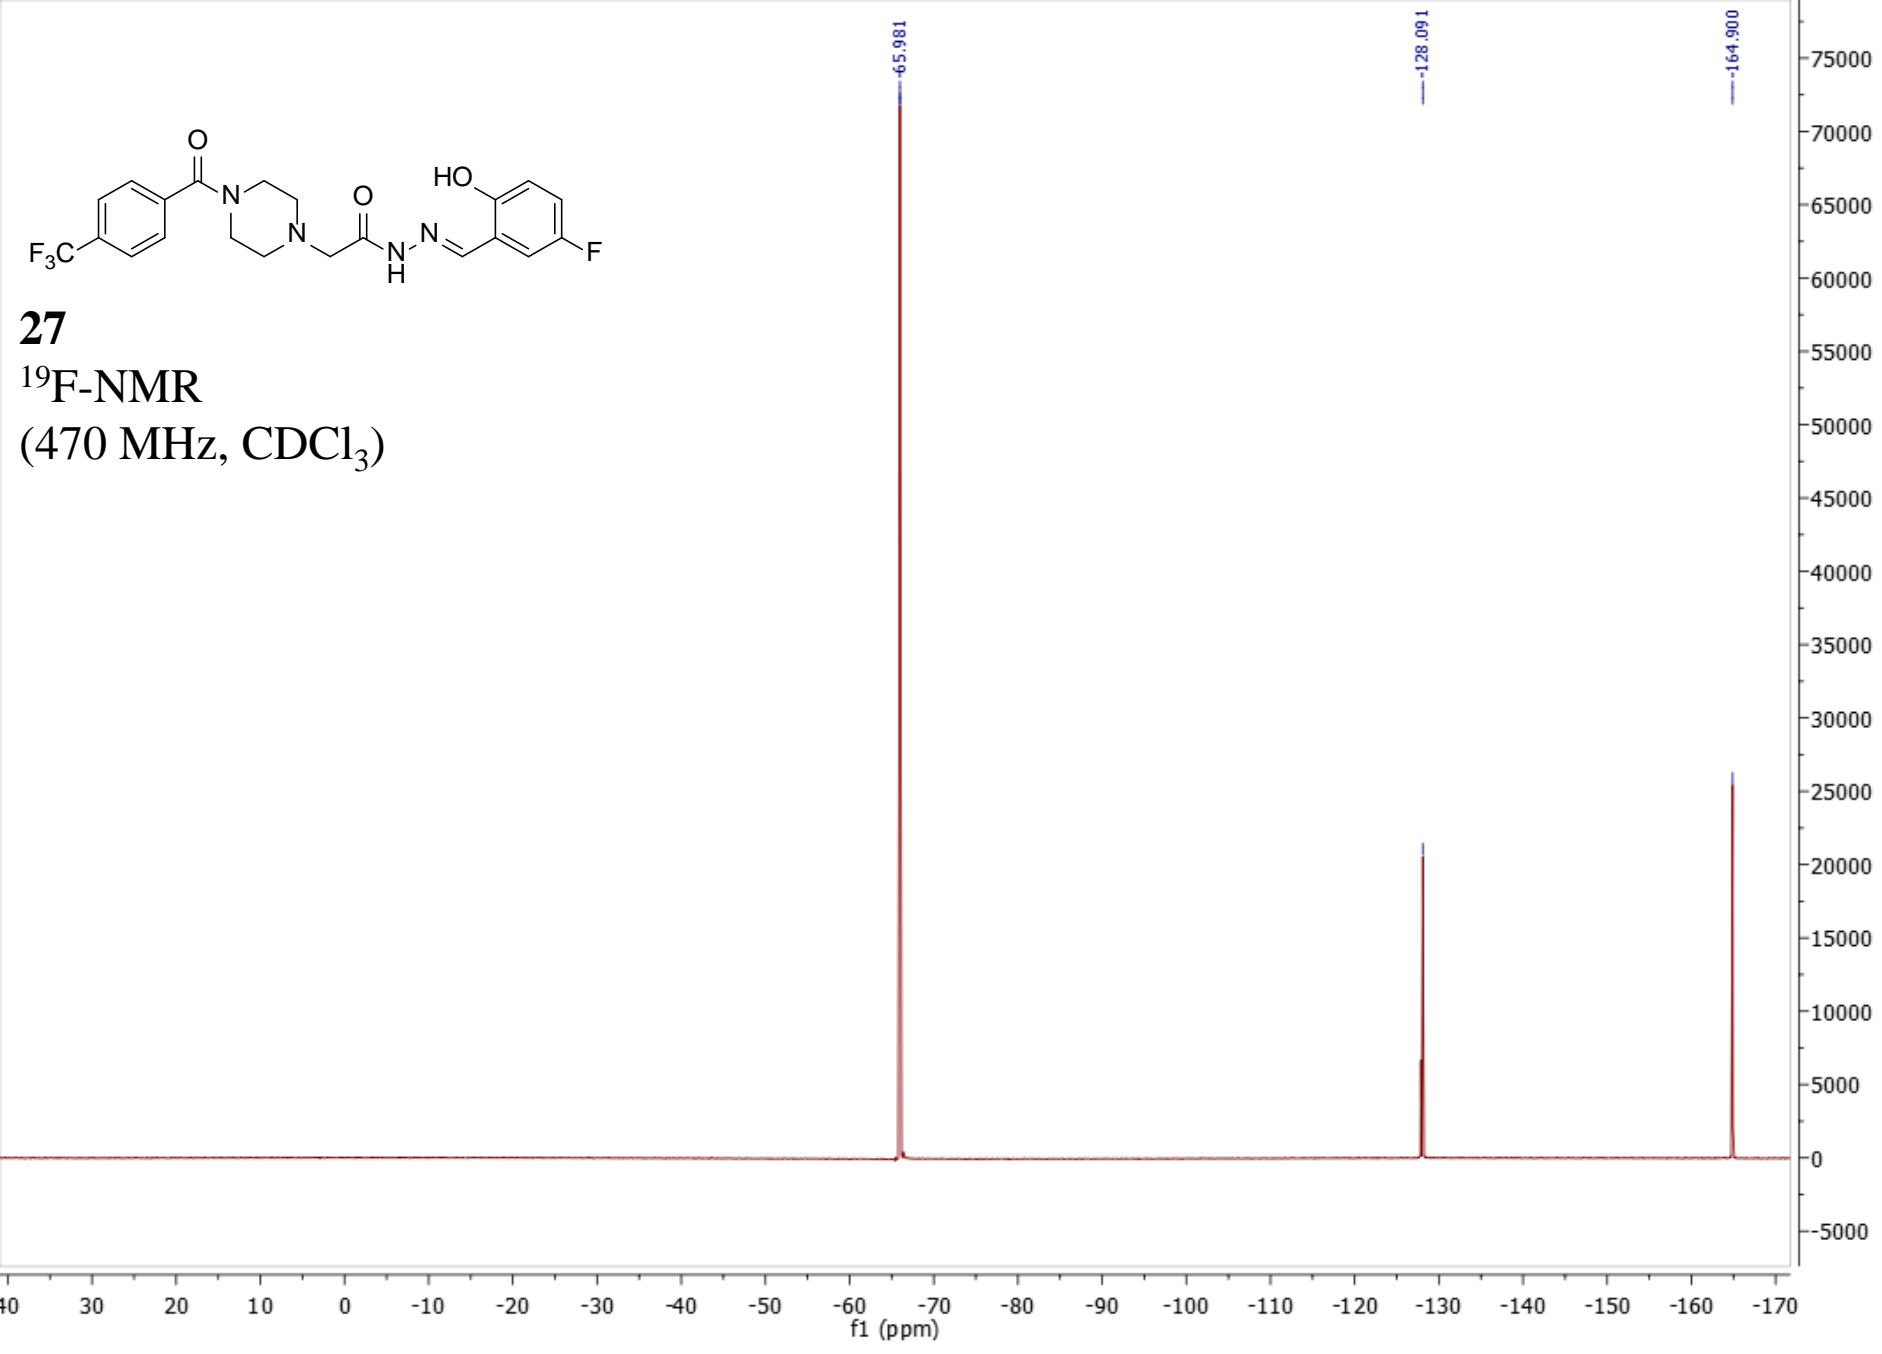

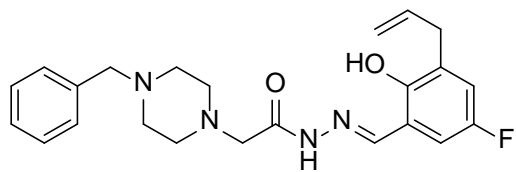

**28**

$^1\text{H-NMR}$

(500 MHz,  $\text{CDCl}_3$ )

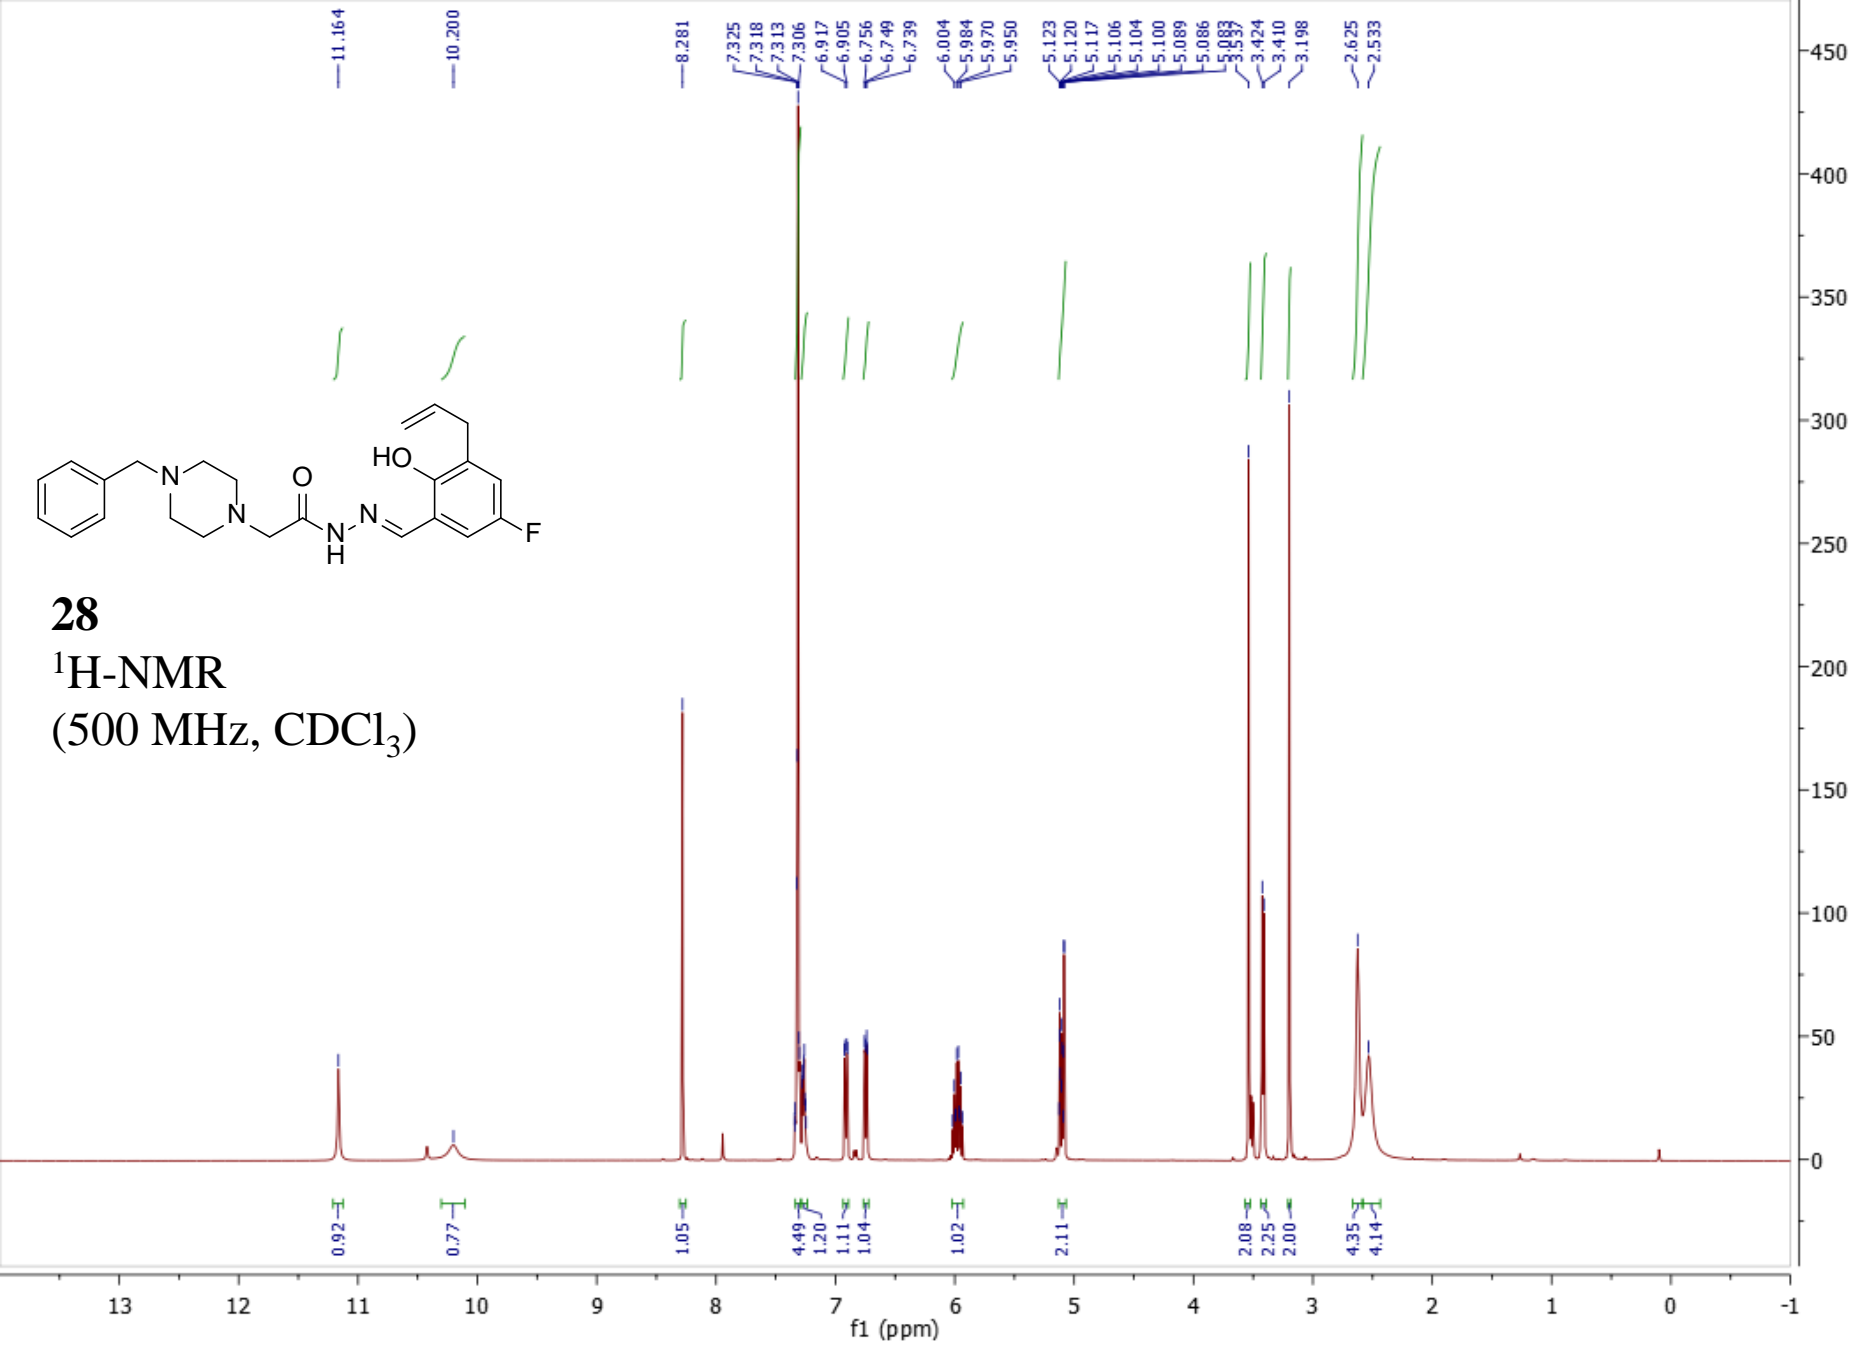

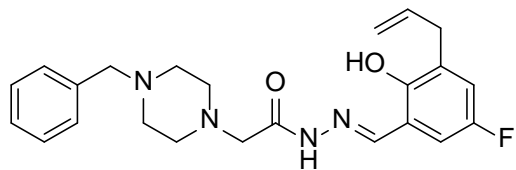

**28**

$^{13}\text{C}$ -NMR

(125 MHz,  $\text{CDCl}_3$ )

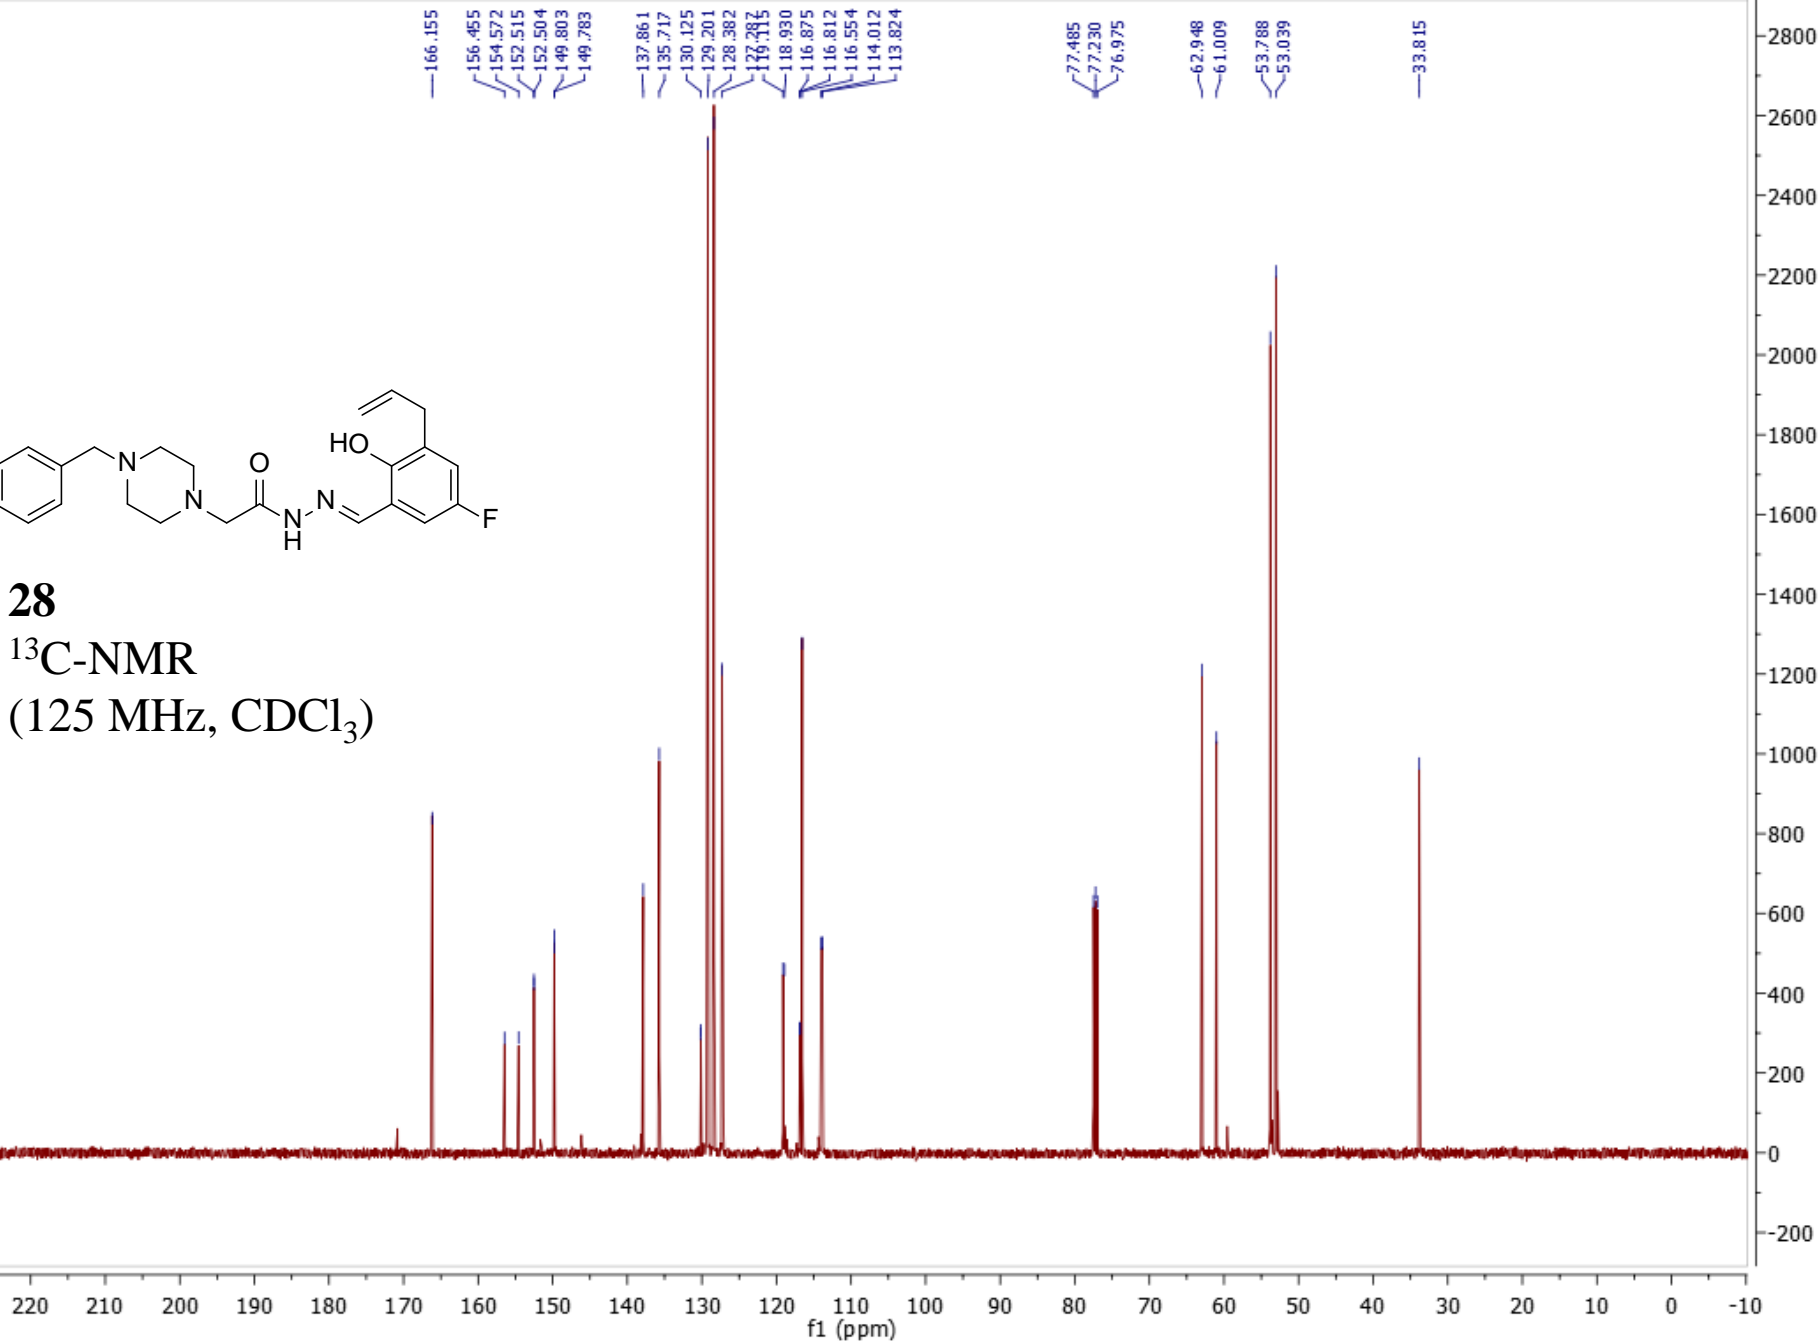

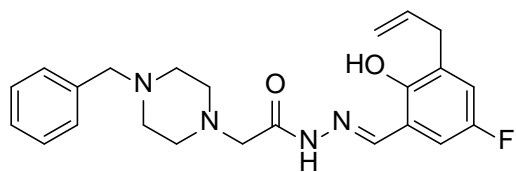

**28**

<sup>19</sup>F-NMR

(470 MHz, CDCl<sub>3</sub>)

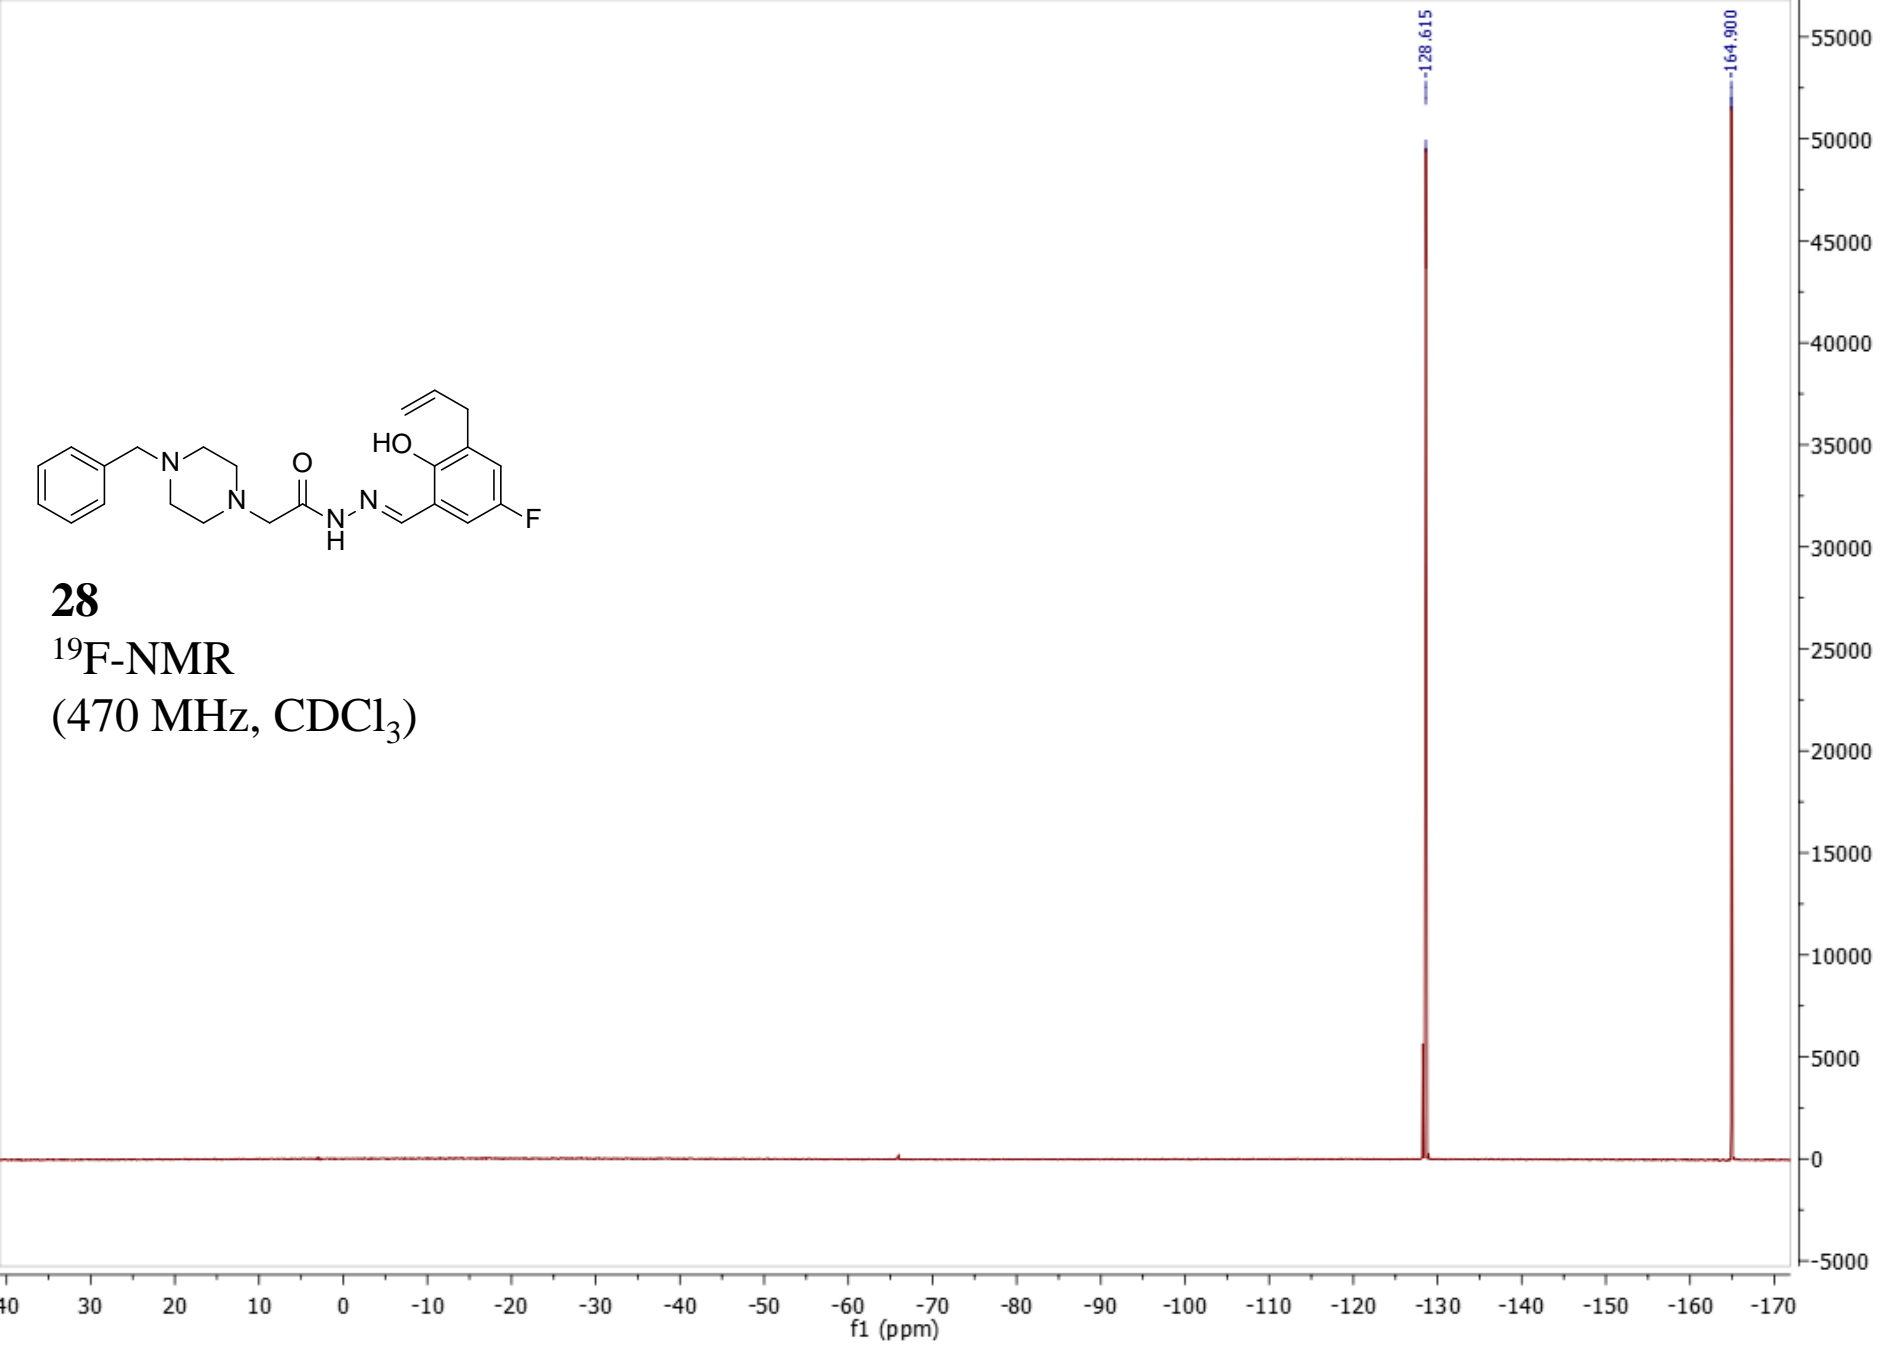

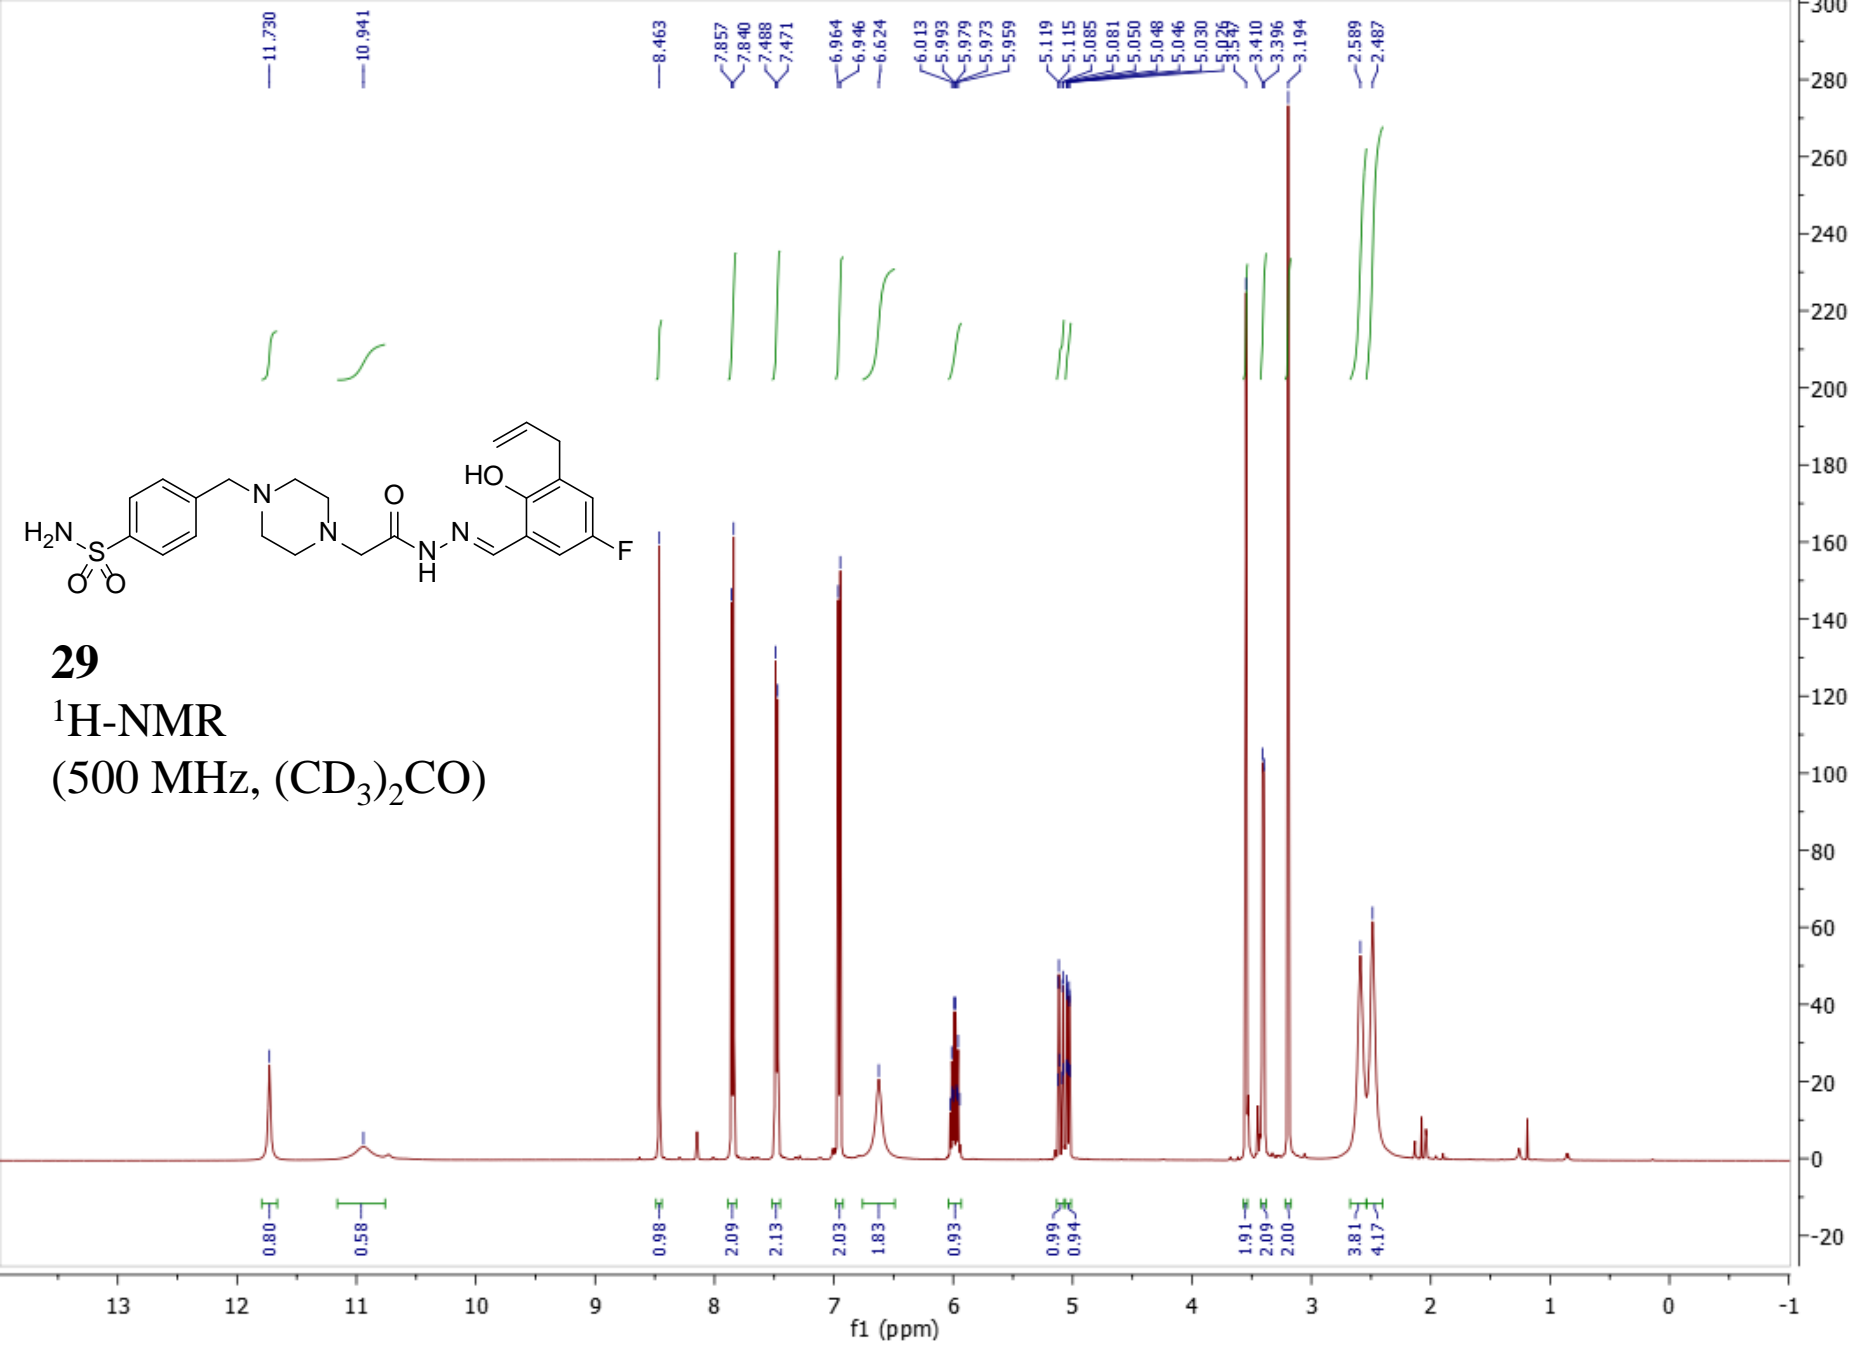

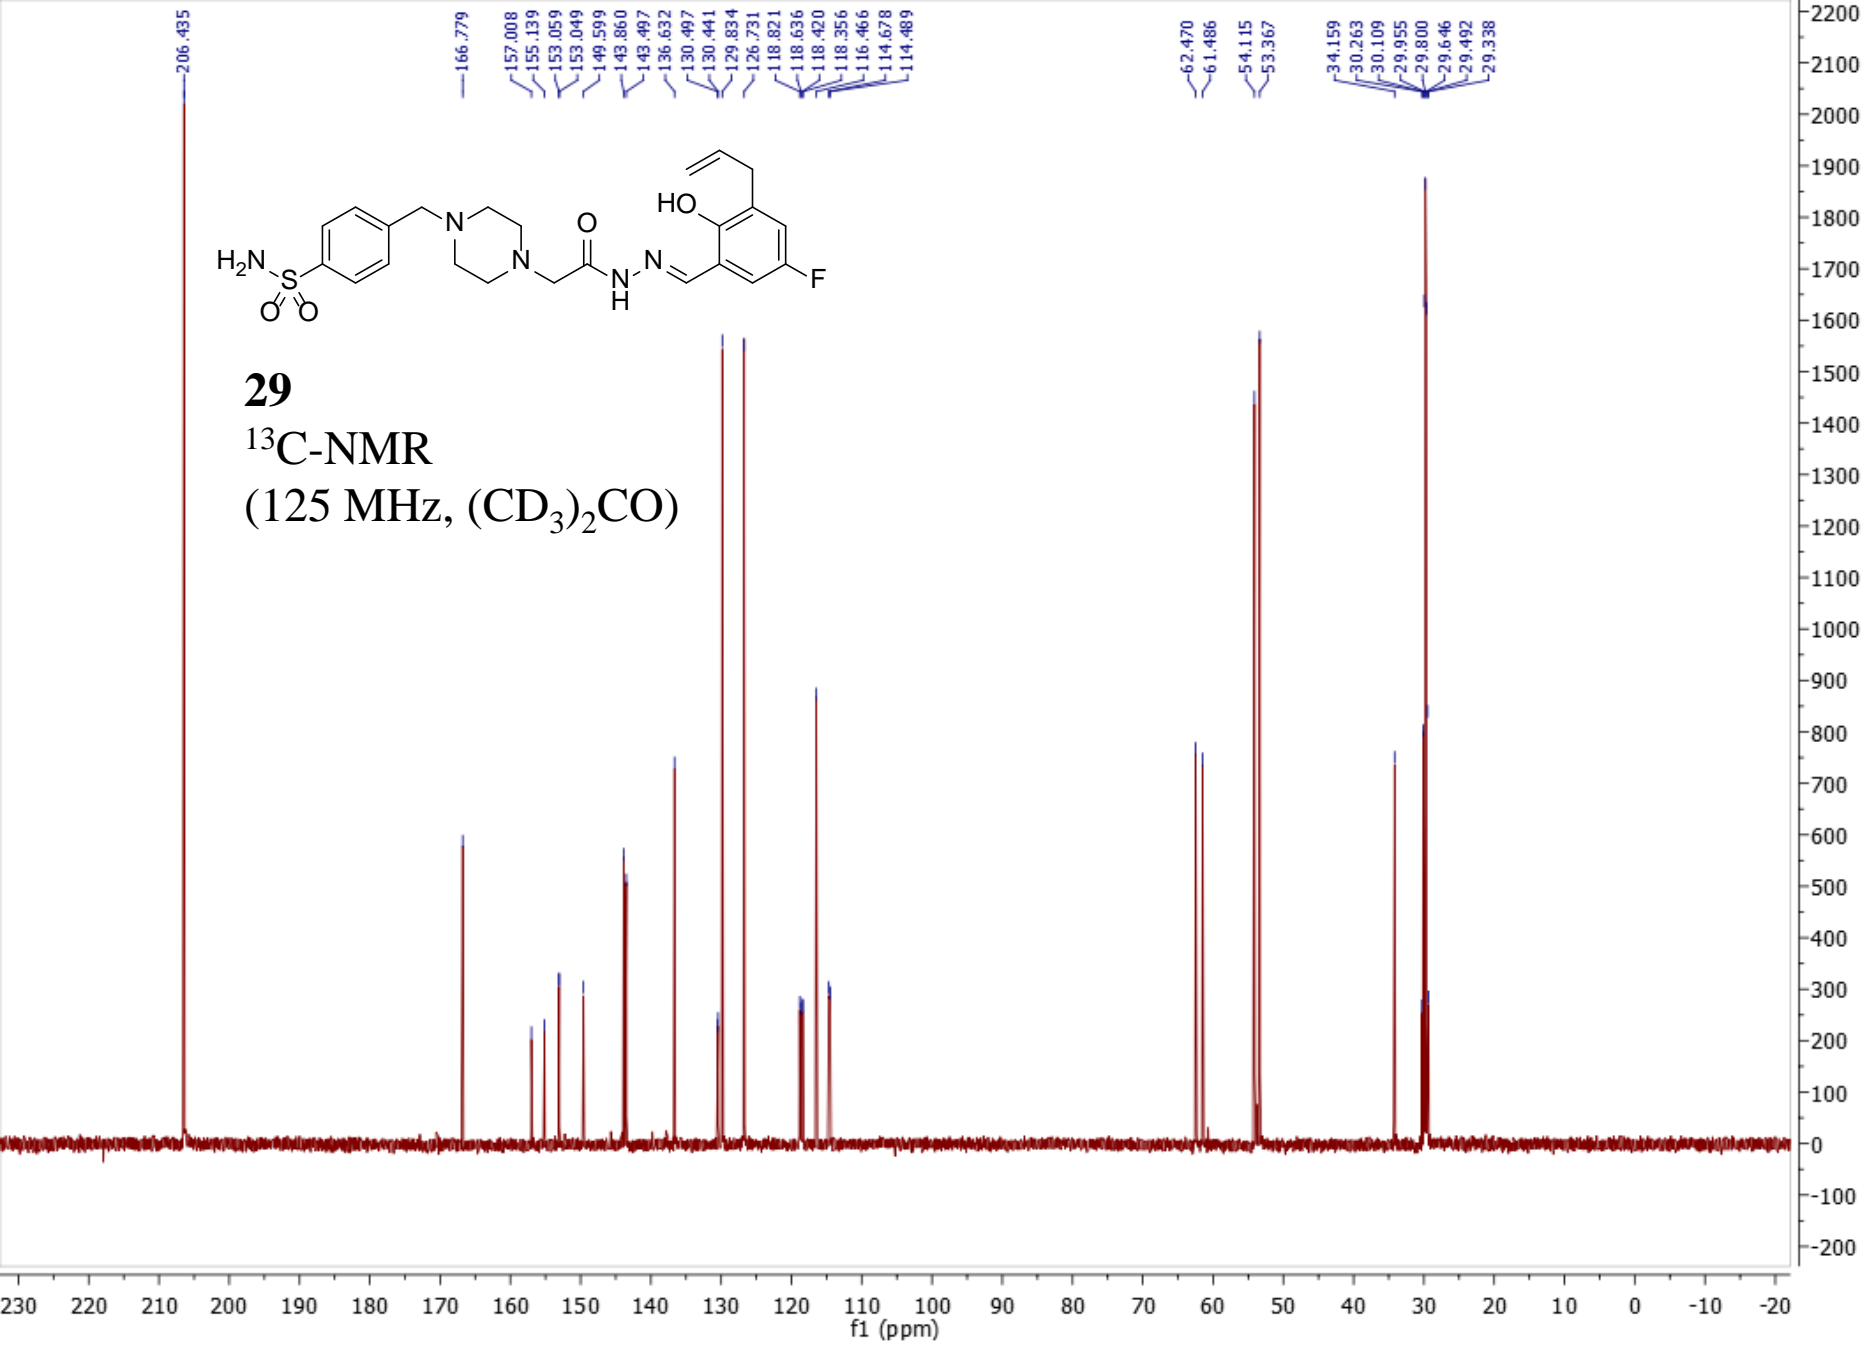

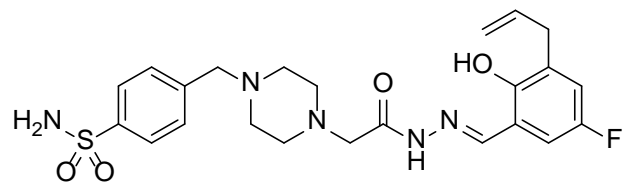

**29**

<sup>19</sup>F-NMR

(470 MHz, (CD<sub>3</sub>)<sub>2</sub>CO)

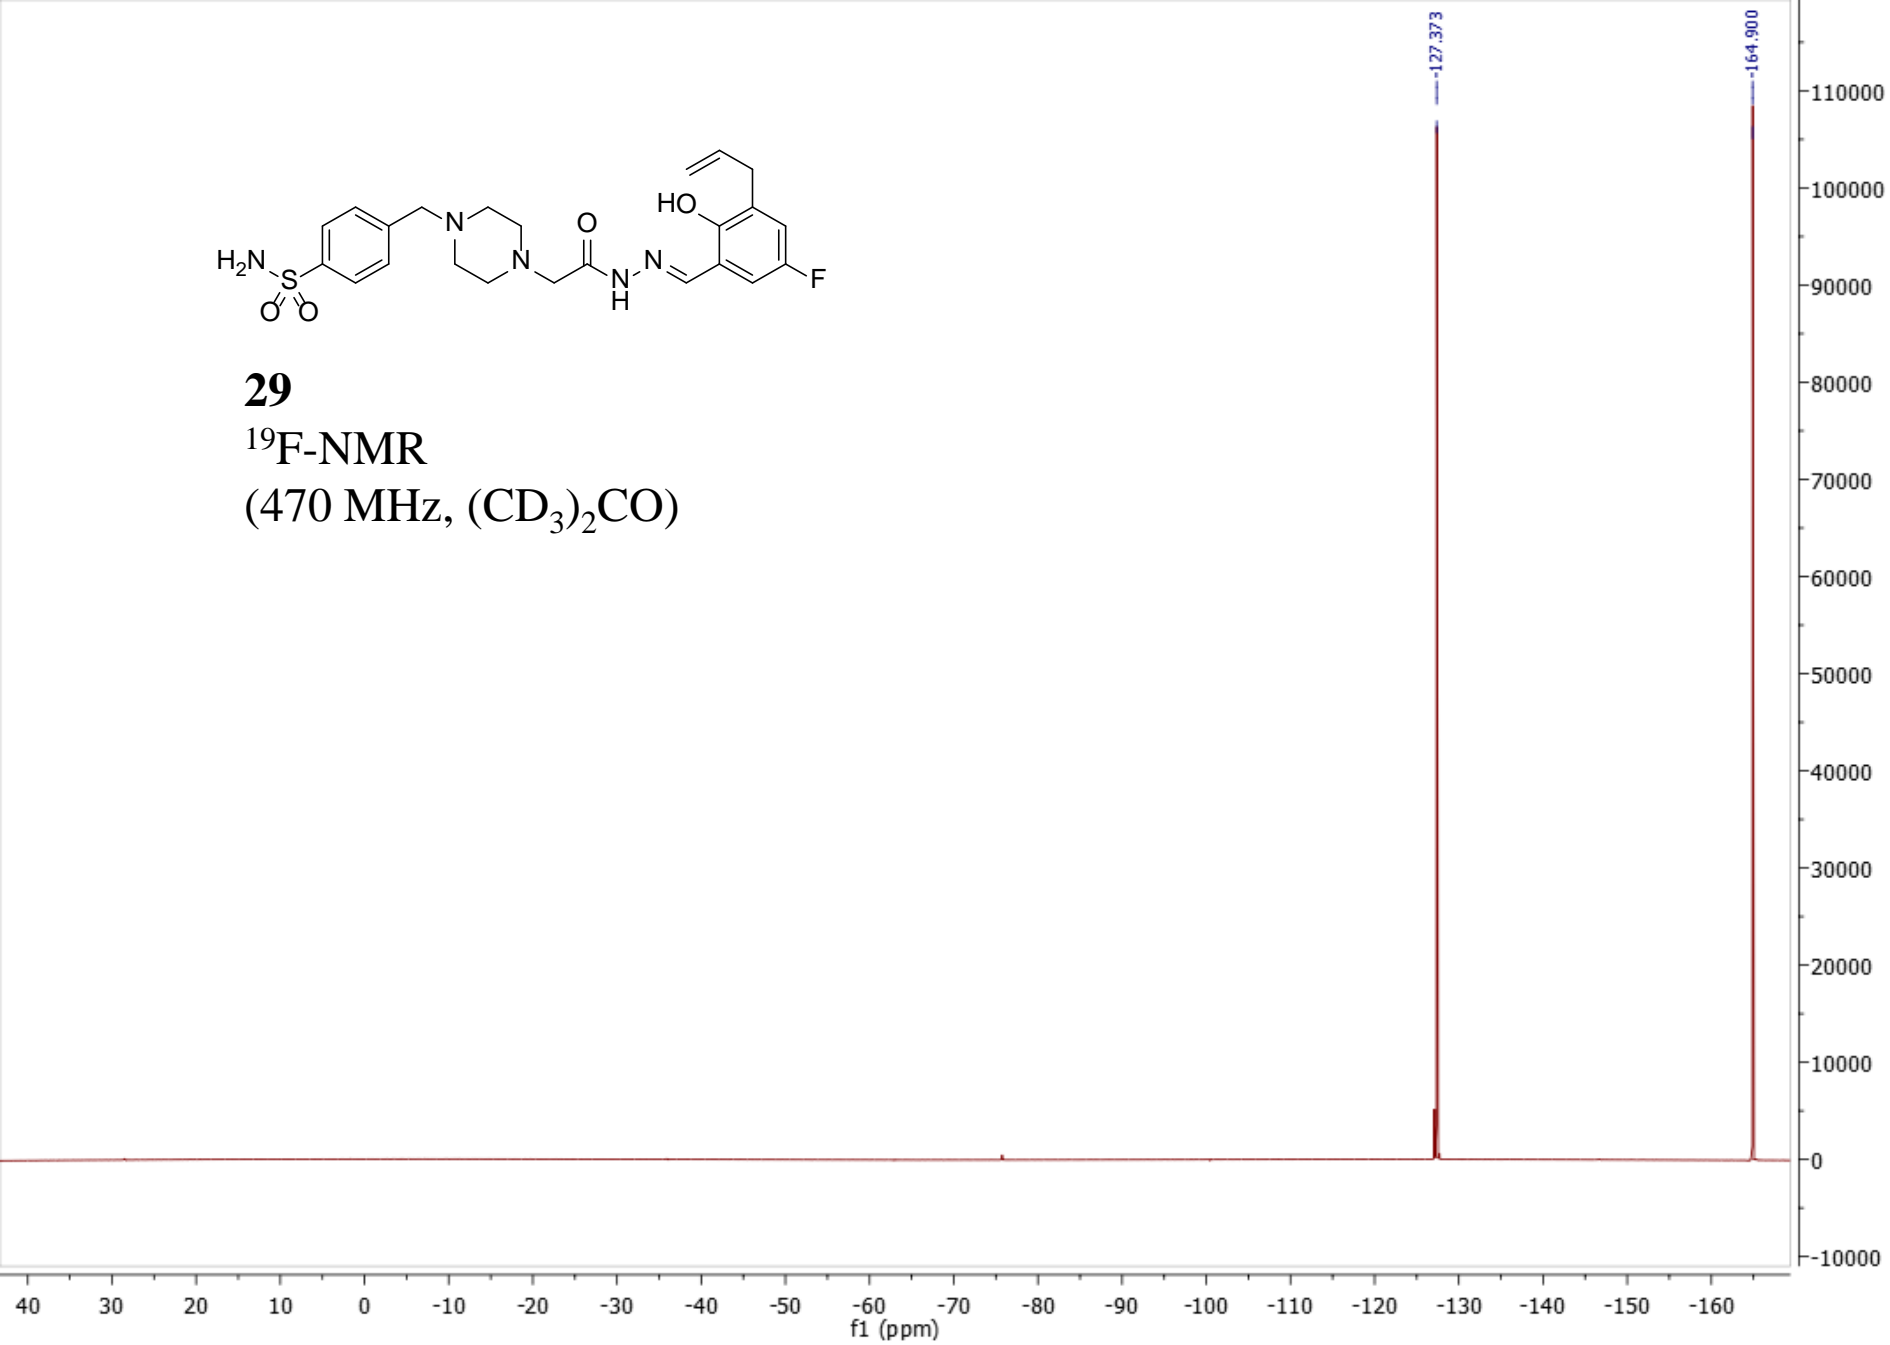

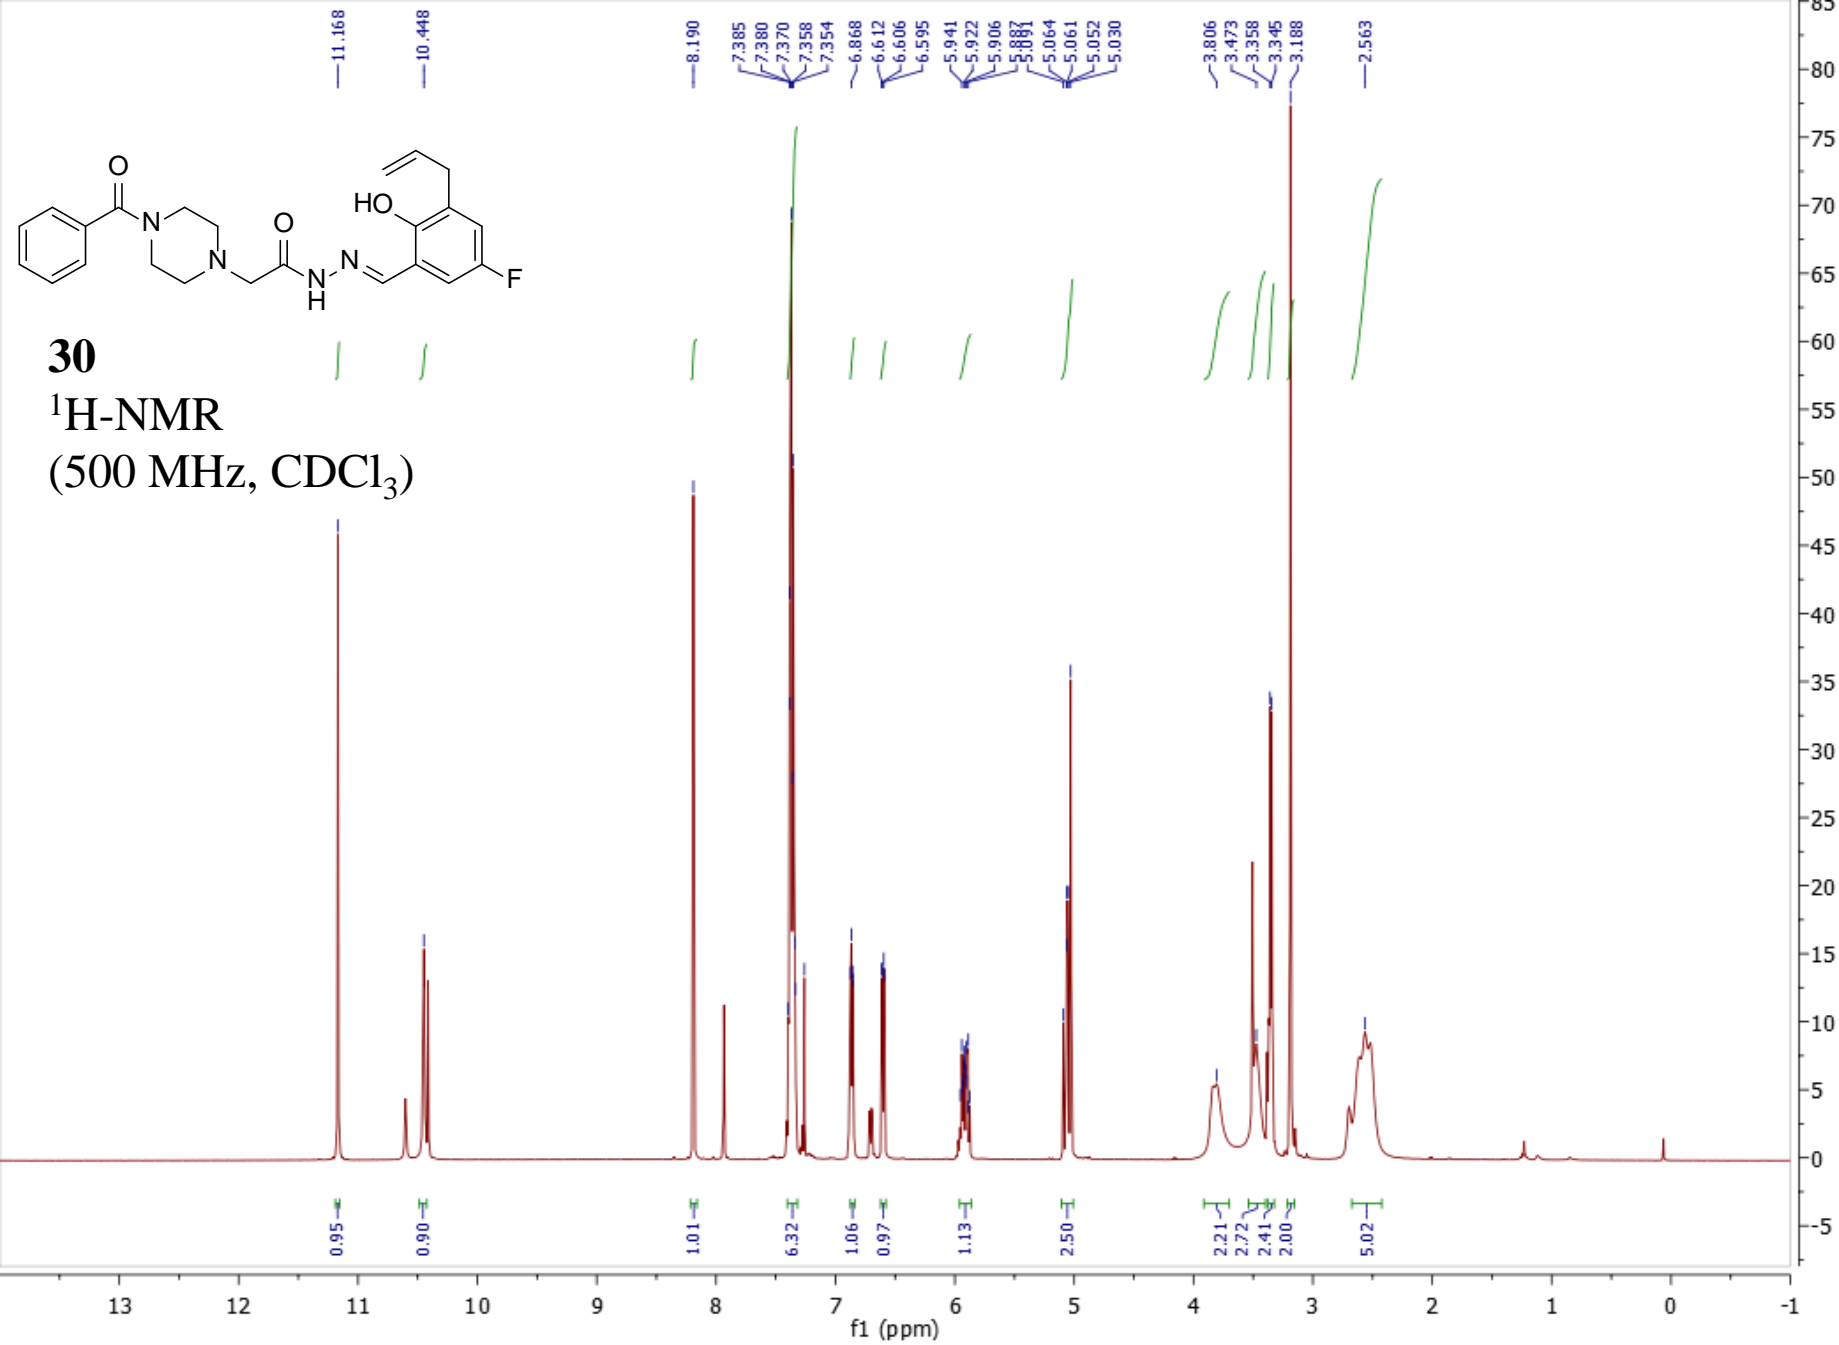



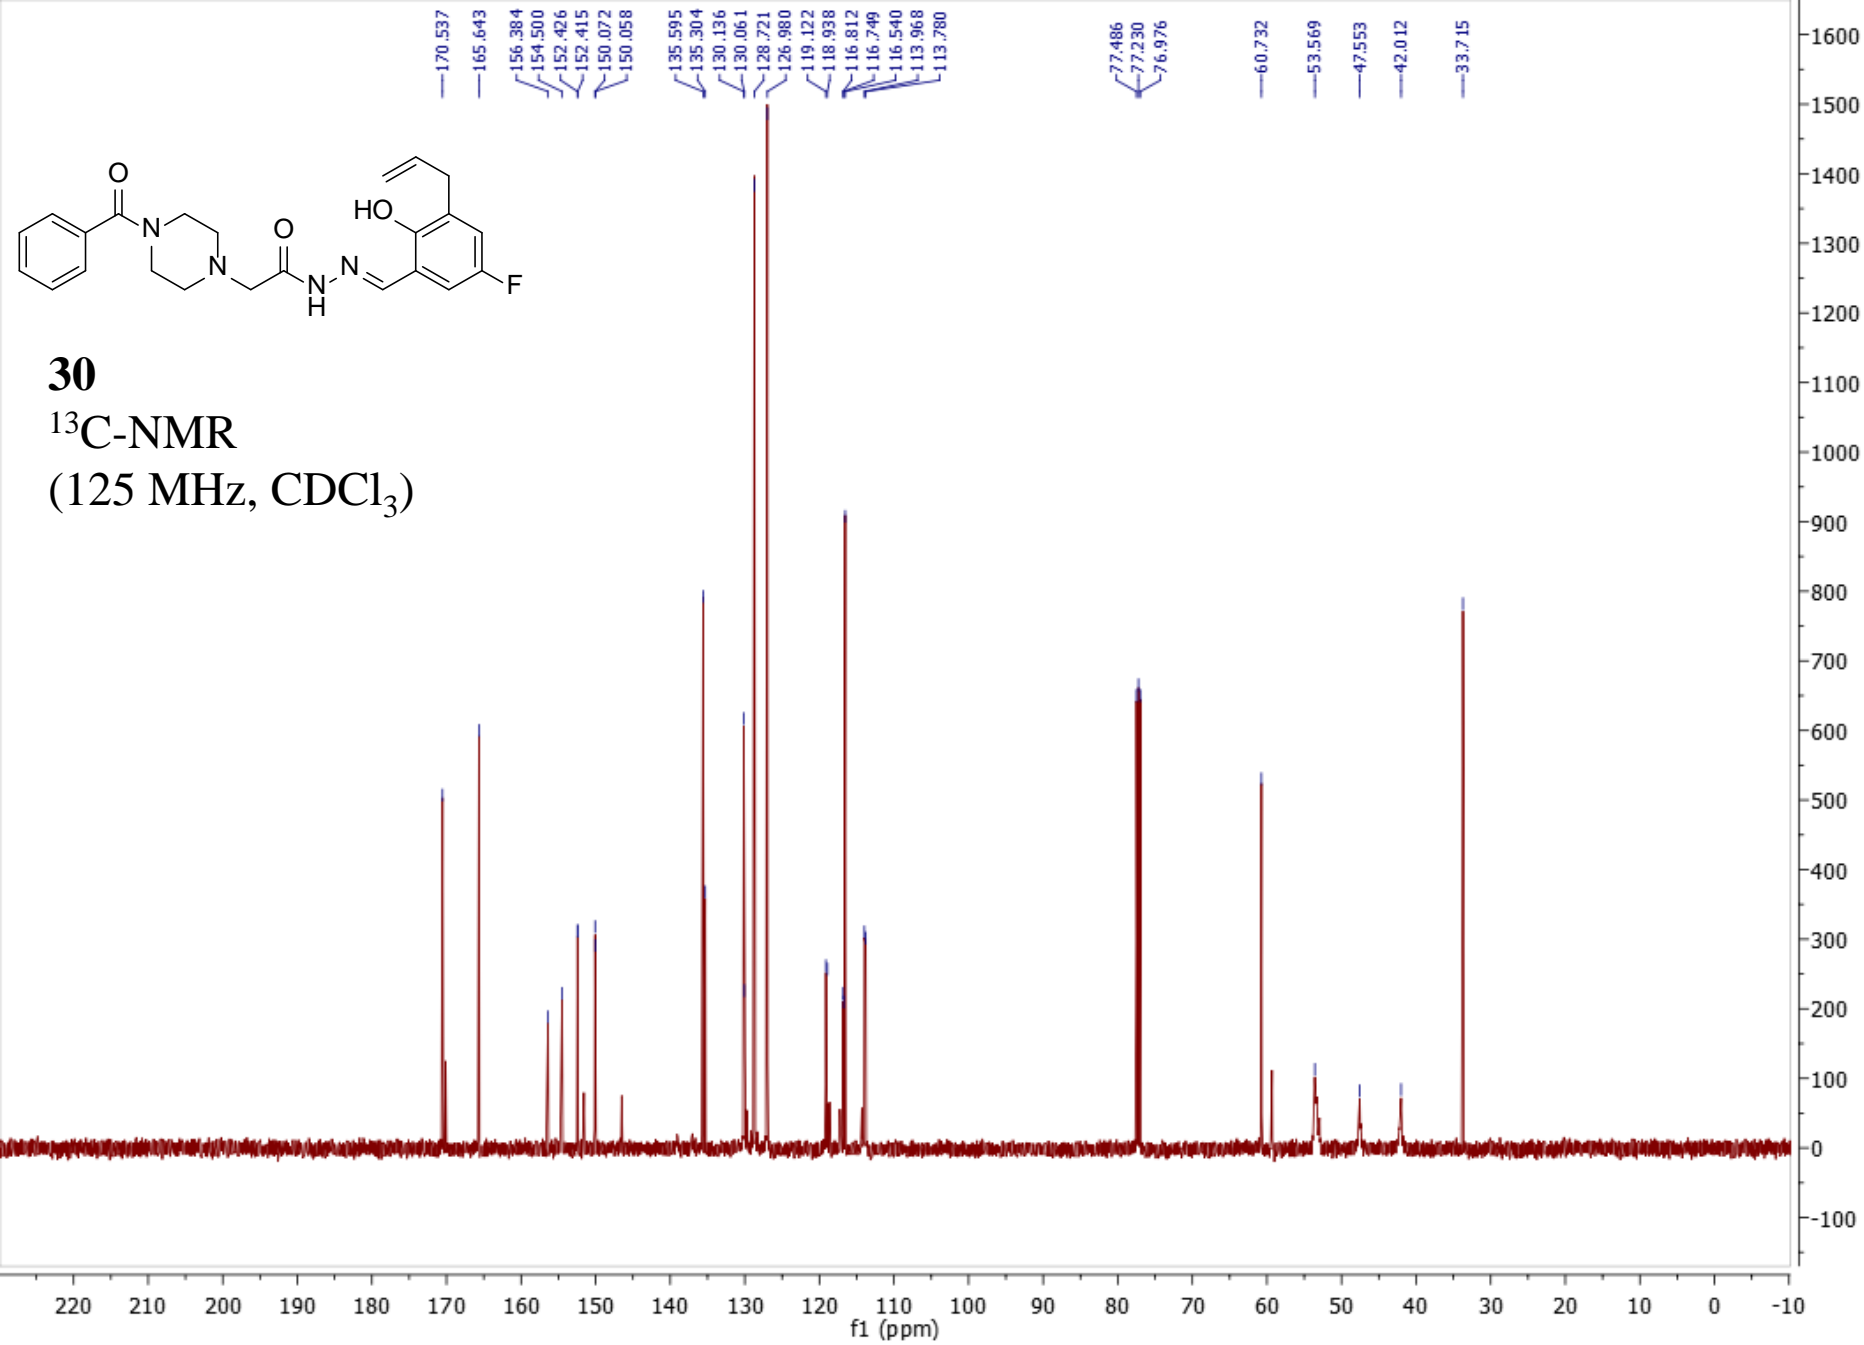

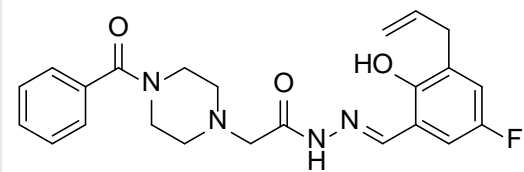

**30**

$^{19}\text{F}$ -NMR

(470 MHz,  $\text{CDCl}_3$ )

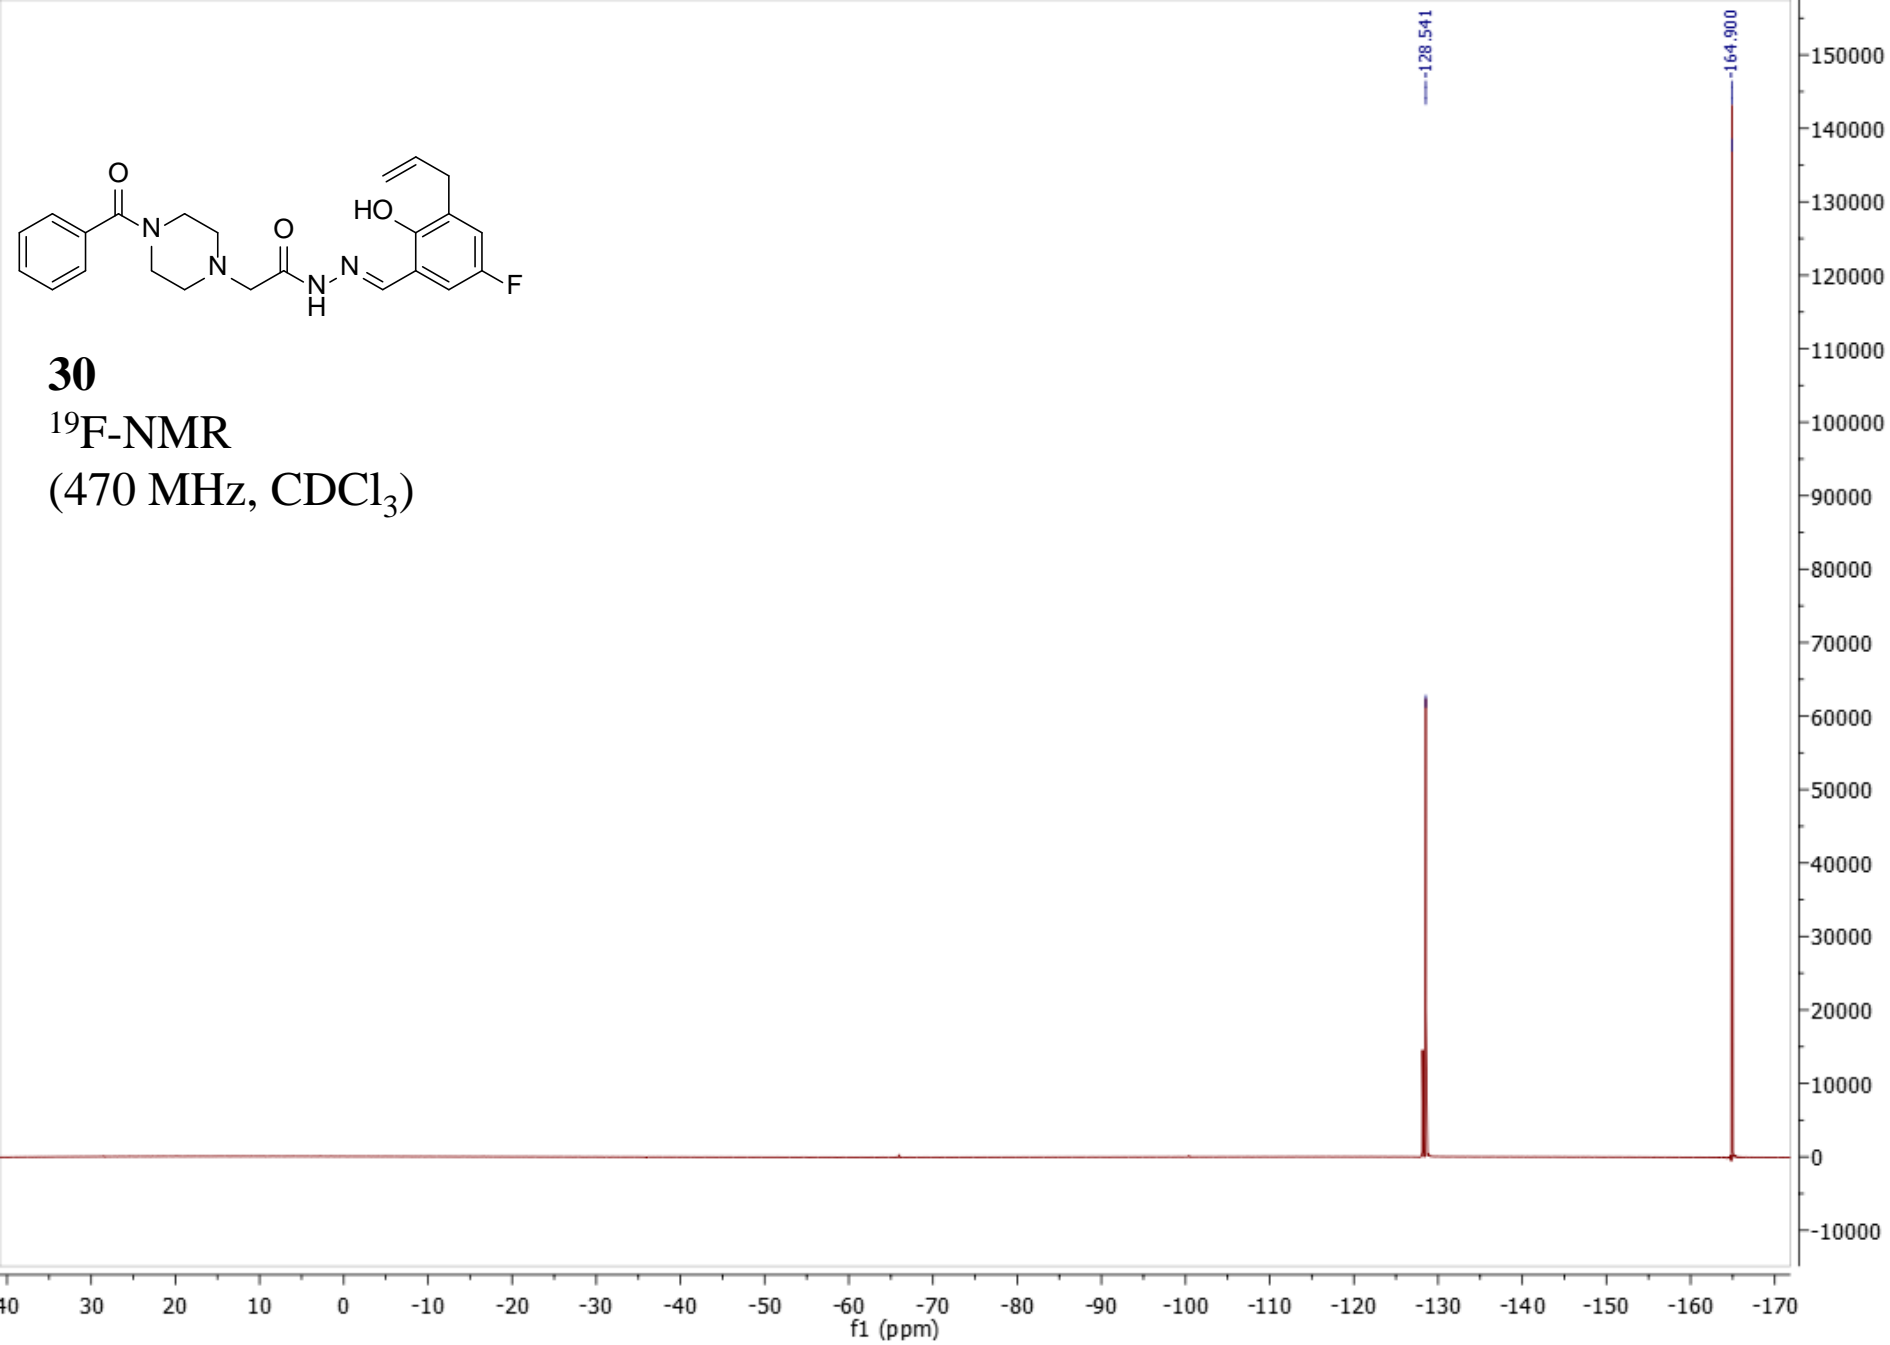

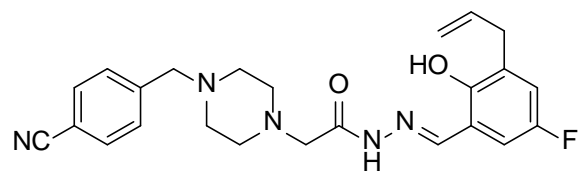

**31**  
 $^1\text{H-NMR}$   
 (500 MHz,  $\text{CDCl}_3$ )

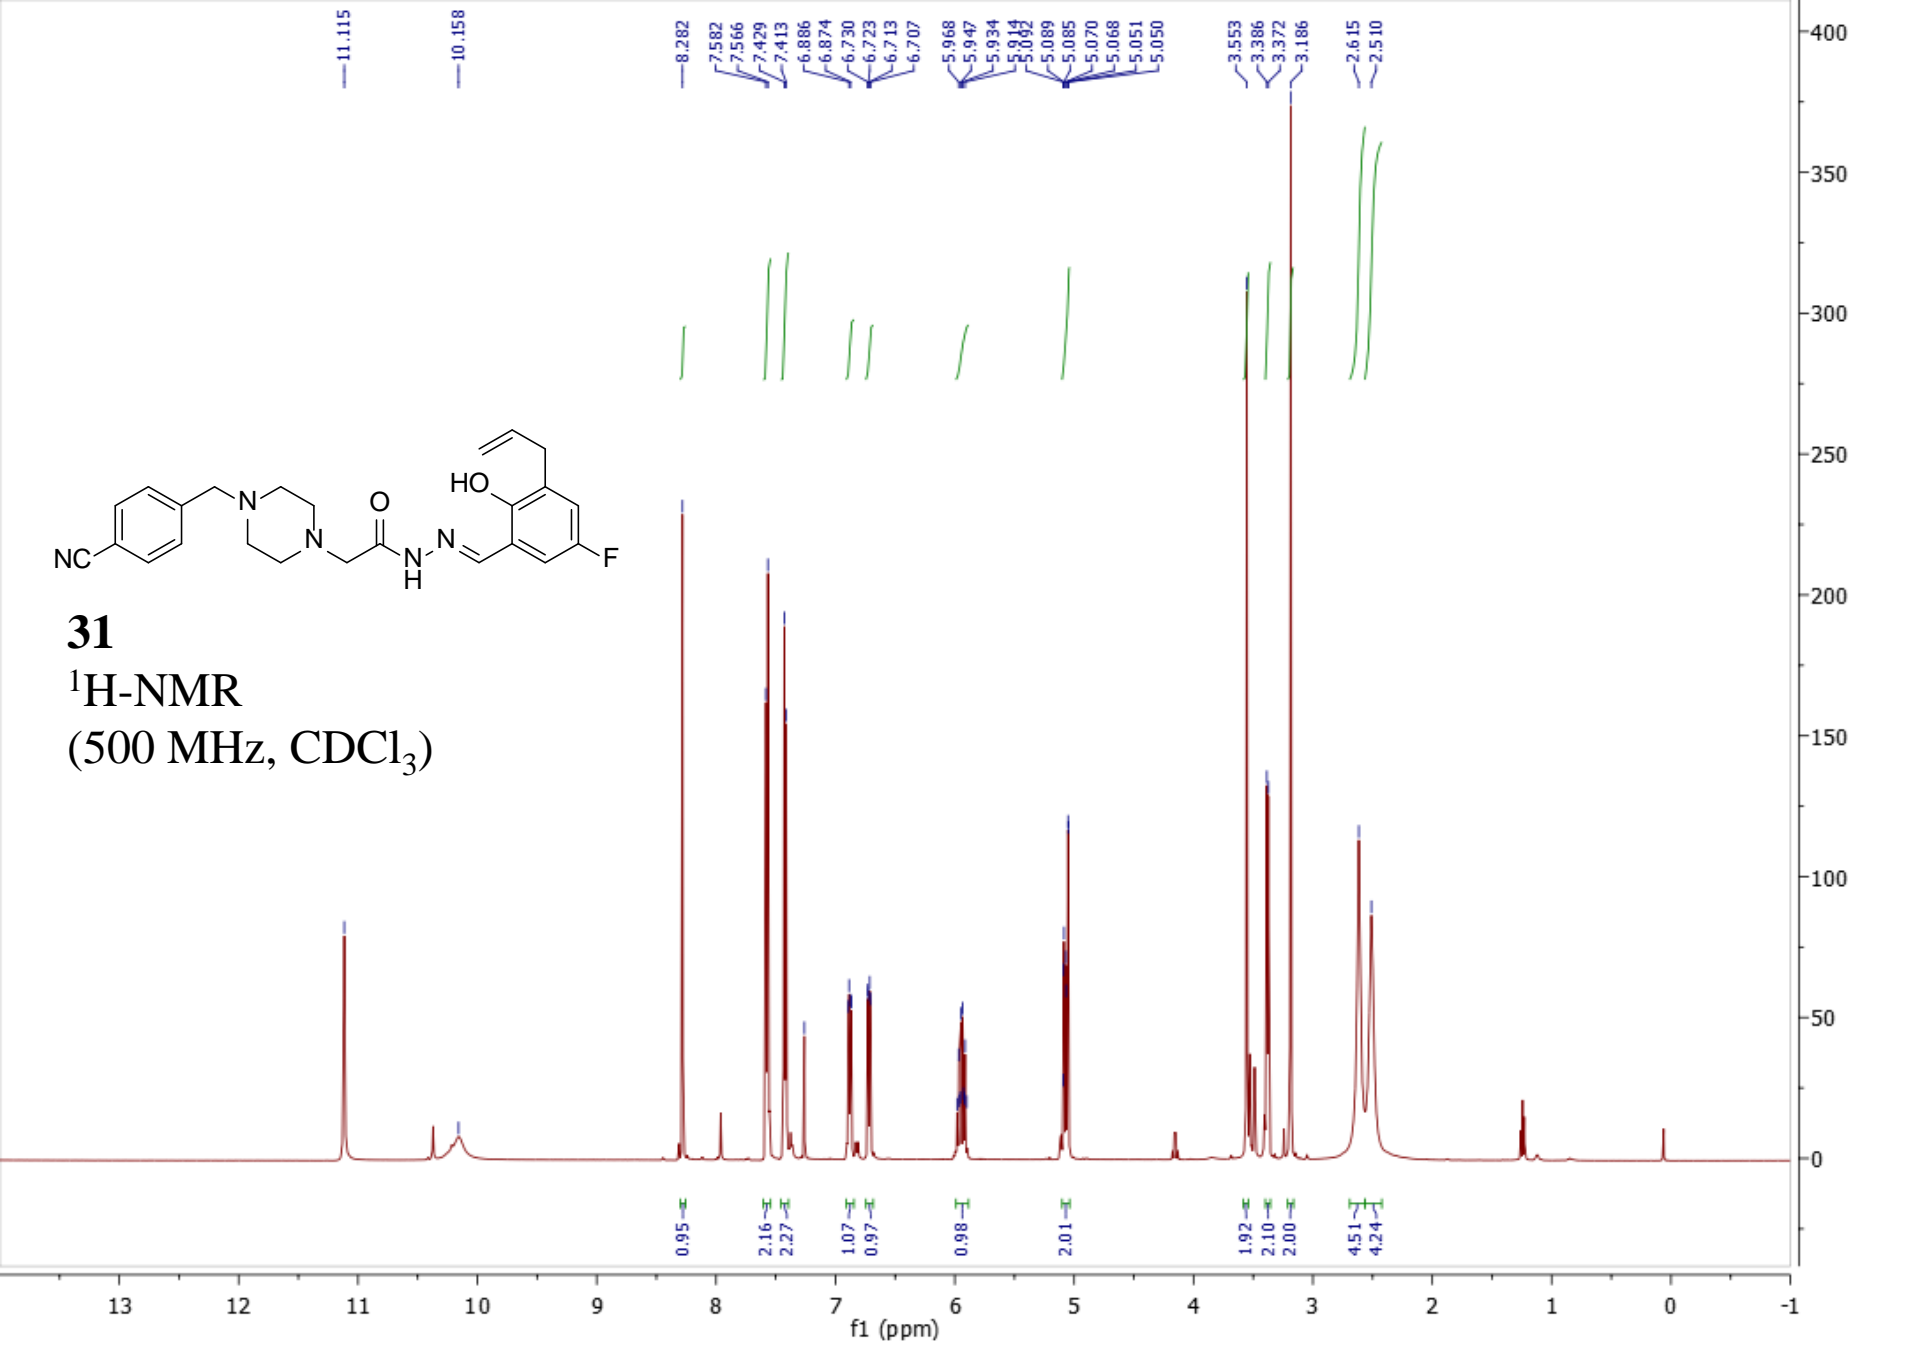

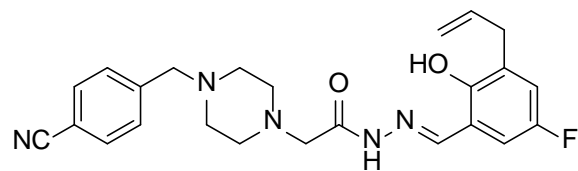

**31**  
 $^{13}\text{C}$ -NMR  
(125 MHz,  $\text{CDCl}_3$ )

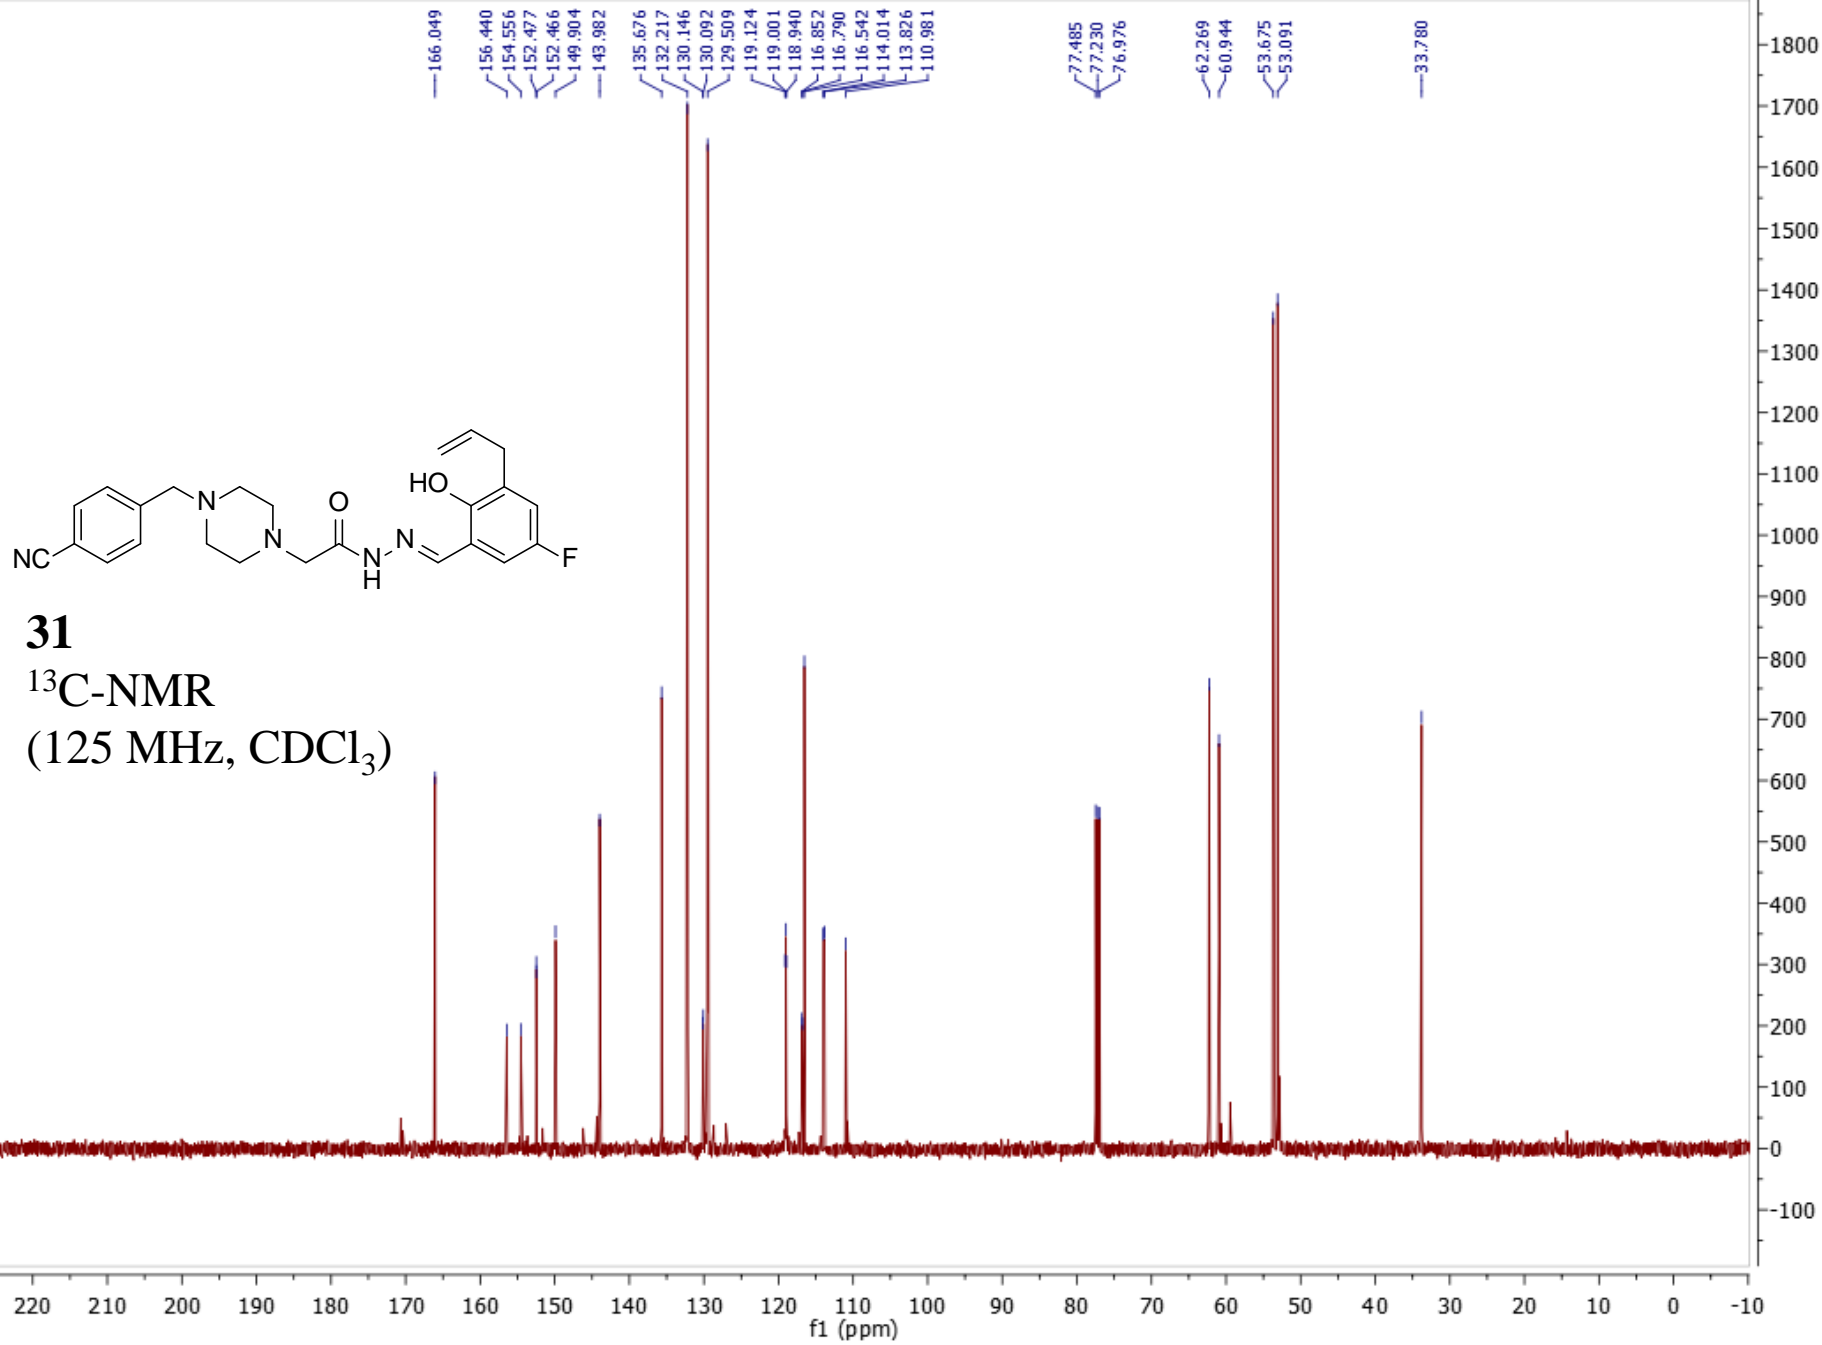

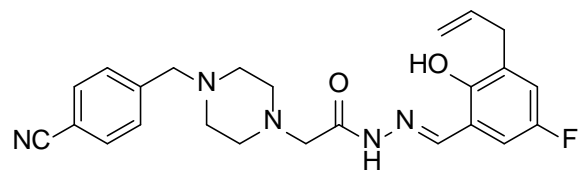

**31**

$^{19}\text{F}$ -NMR

(470 MHz,  $\text{CDCl}_3$ )

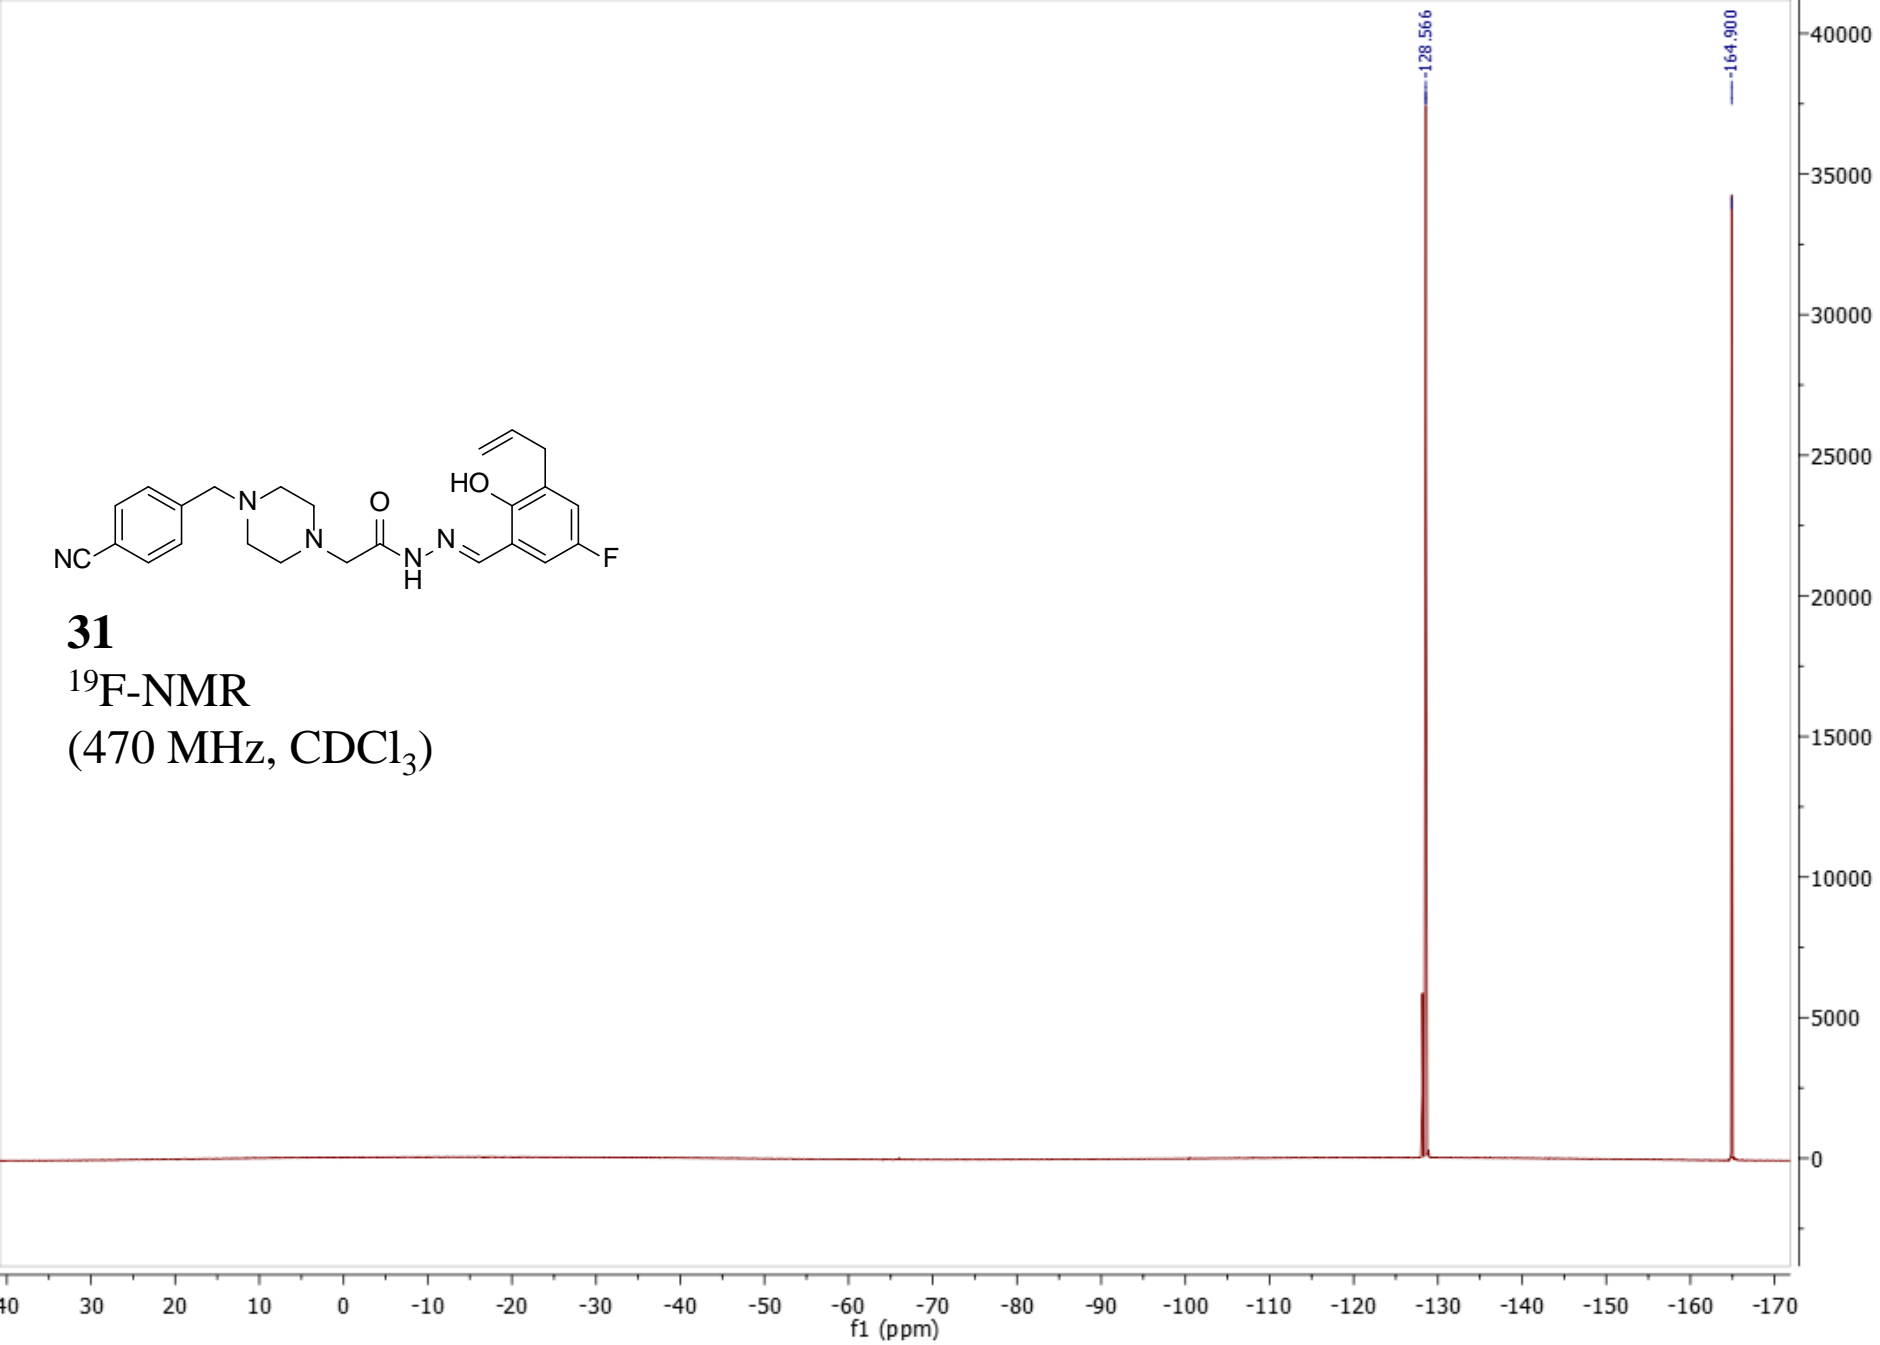

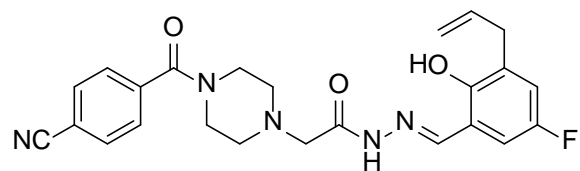

**32**  
<sup>1</sup>H-NMR  
 (500 MHz, CDCl<sub>3</sub>)

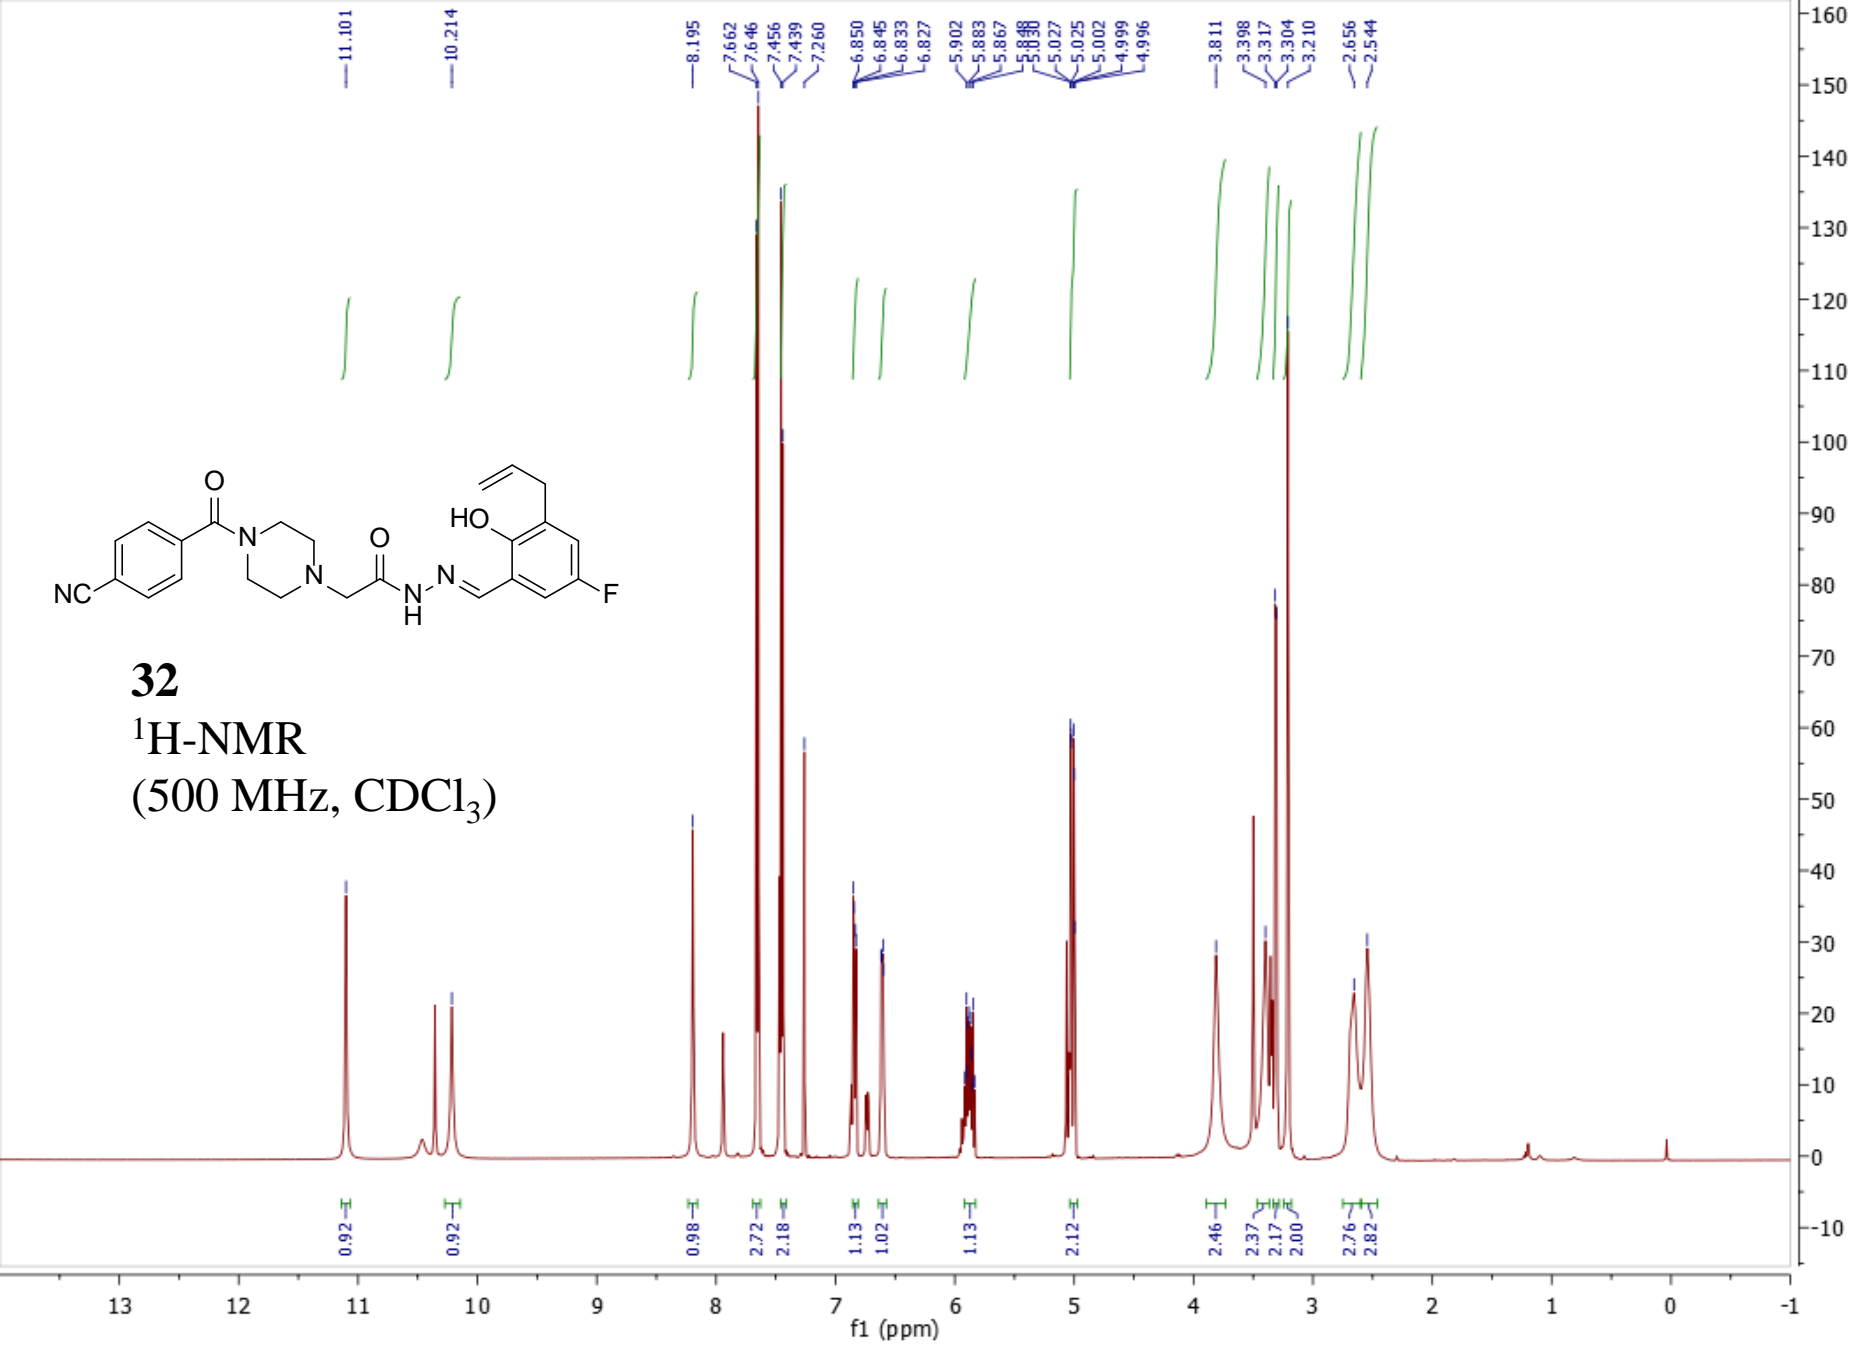

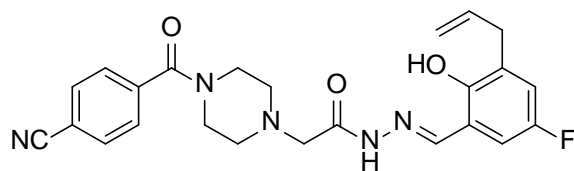

**32**  
 $^{13}\text{C}$ -NMR  
(125 MHz,  $\text{CDCl}_3$ )

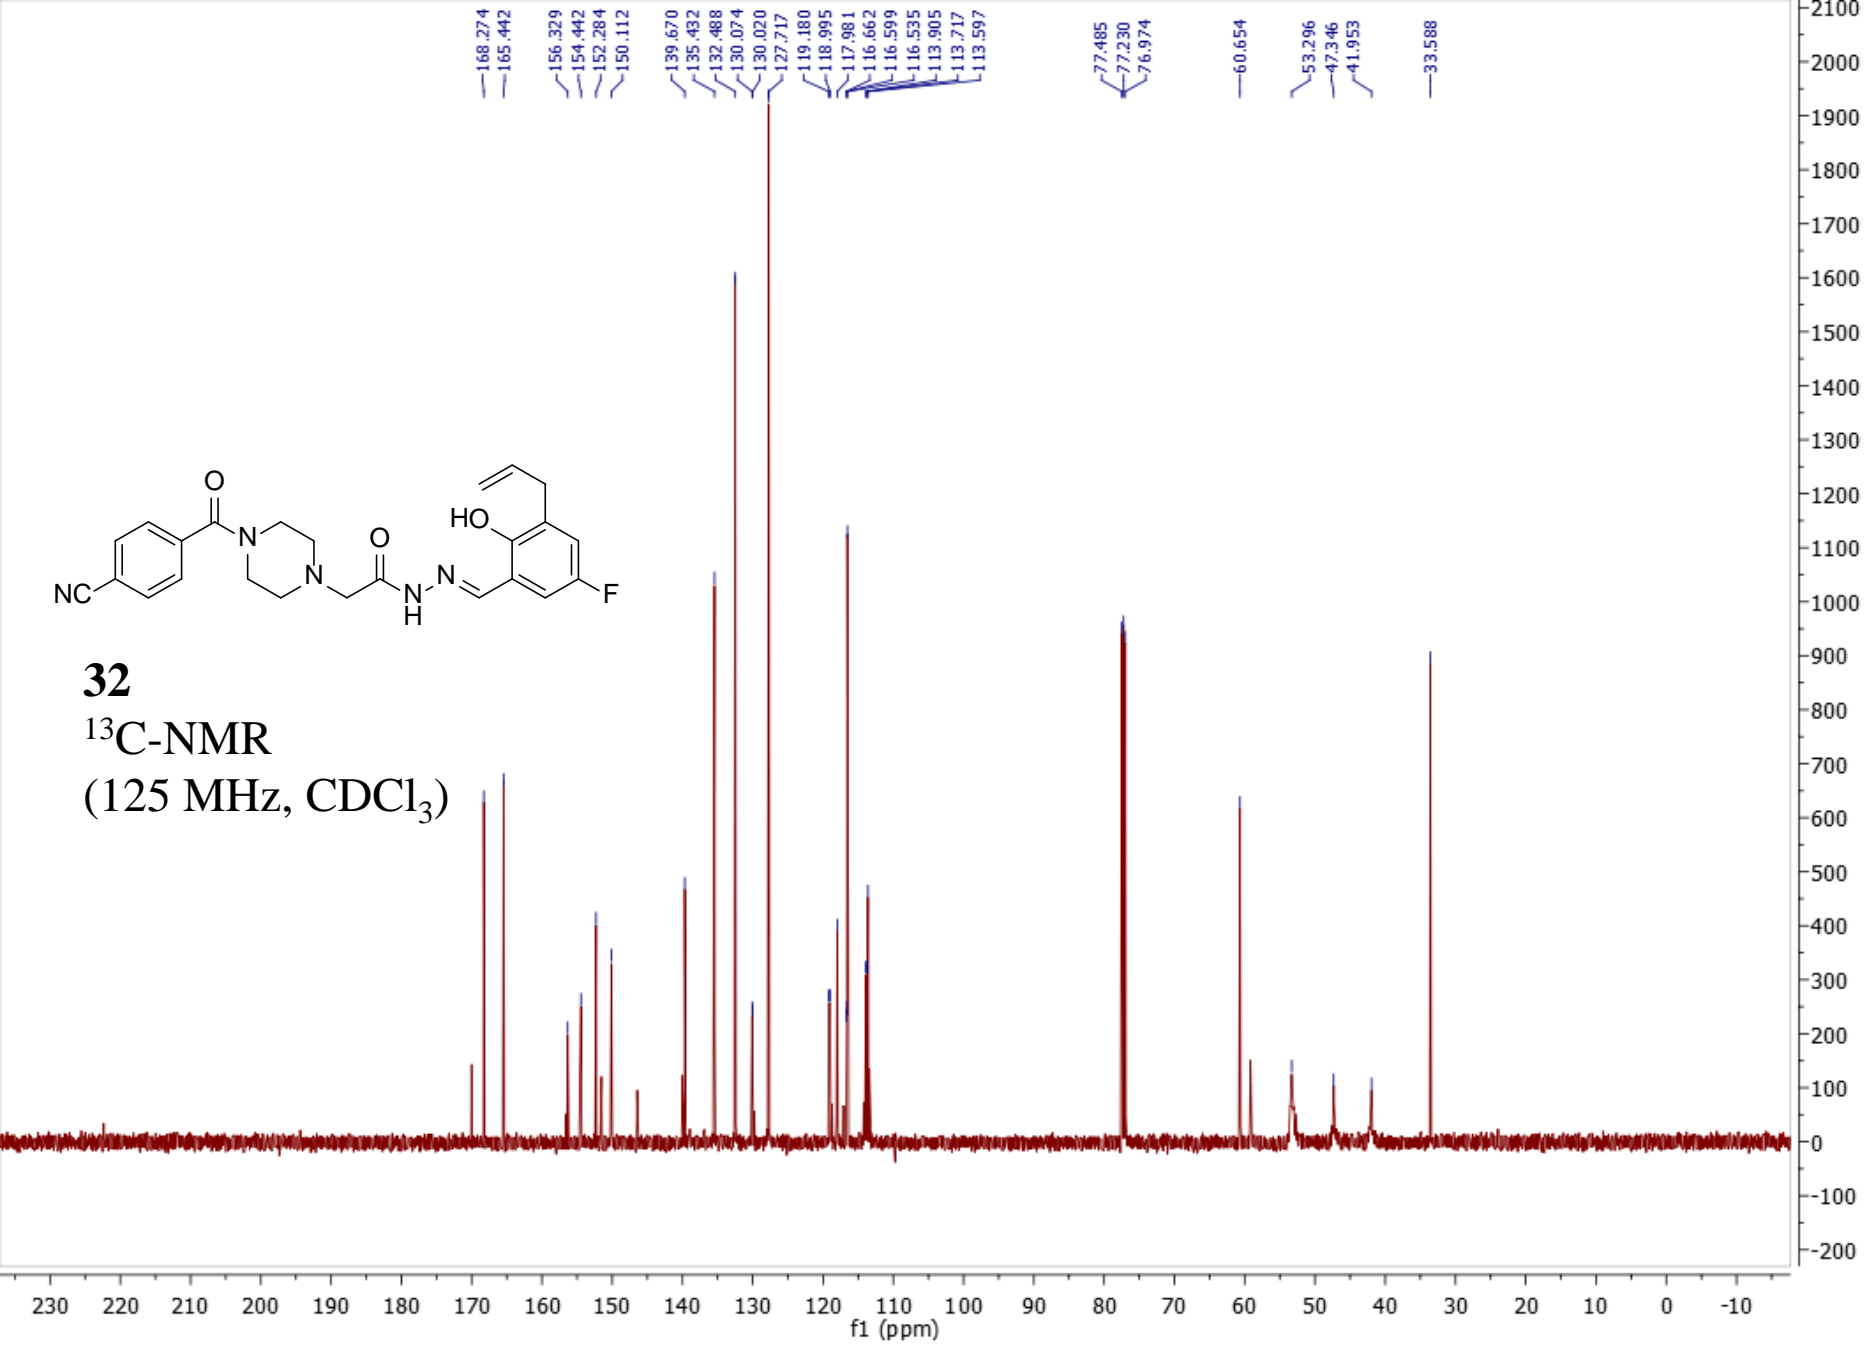



**32**

$^{19}\text{F}$ -NMR

(470 MHz,  $\text{CDCl}_3$ )

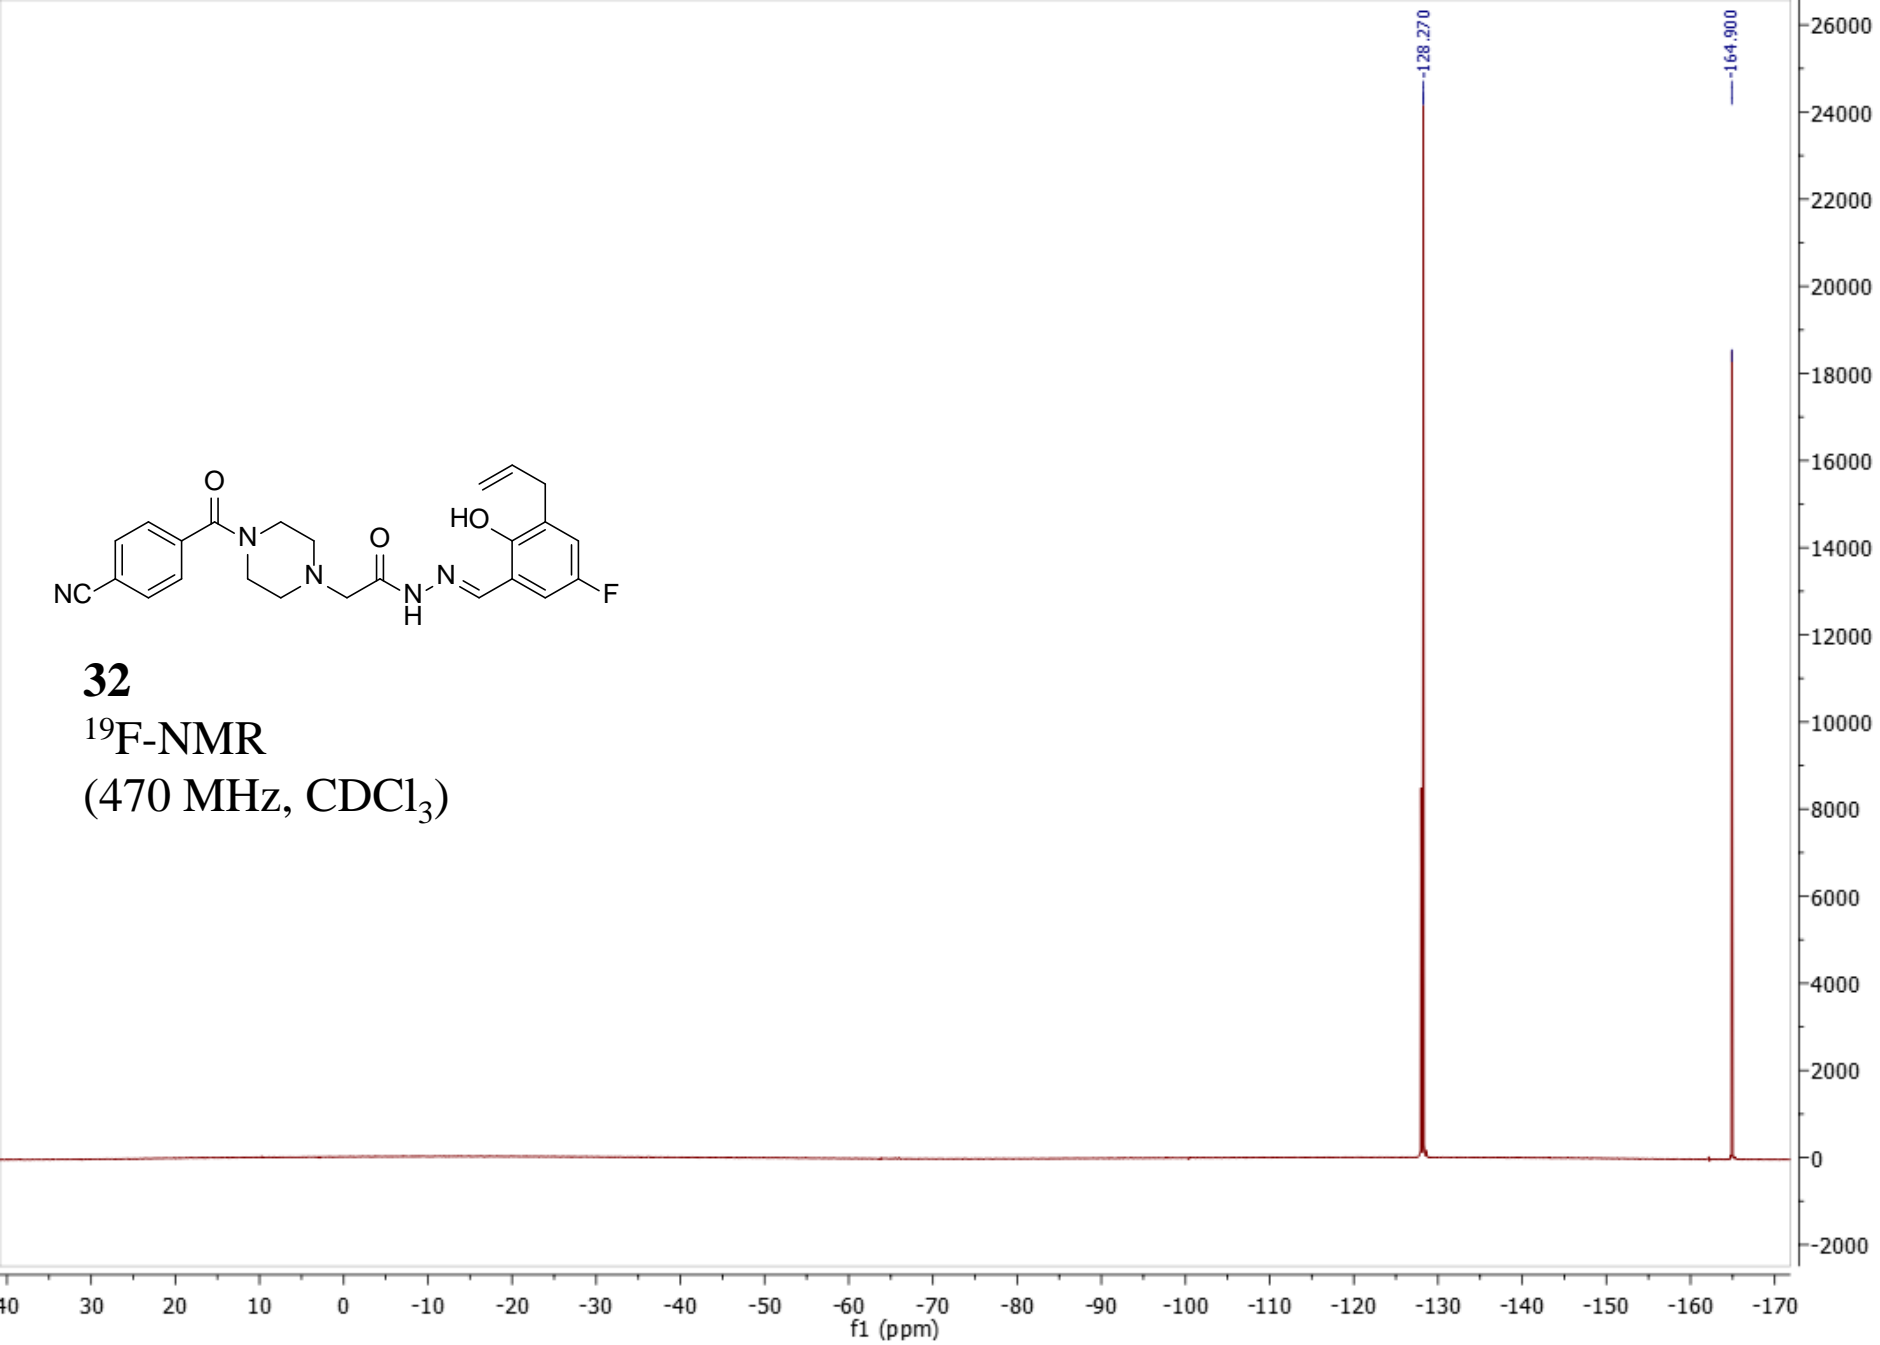



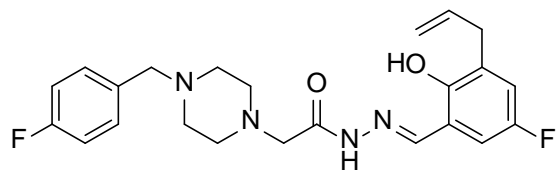

**33**  
<sup>1</sup>H-NMR  
 (500 MHz, CDCl<sub>3</sub>)

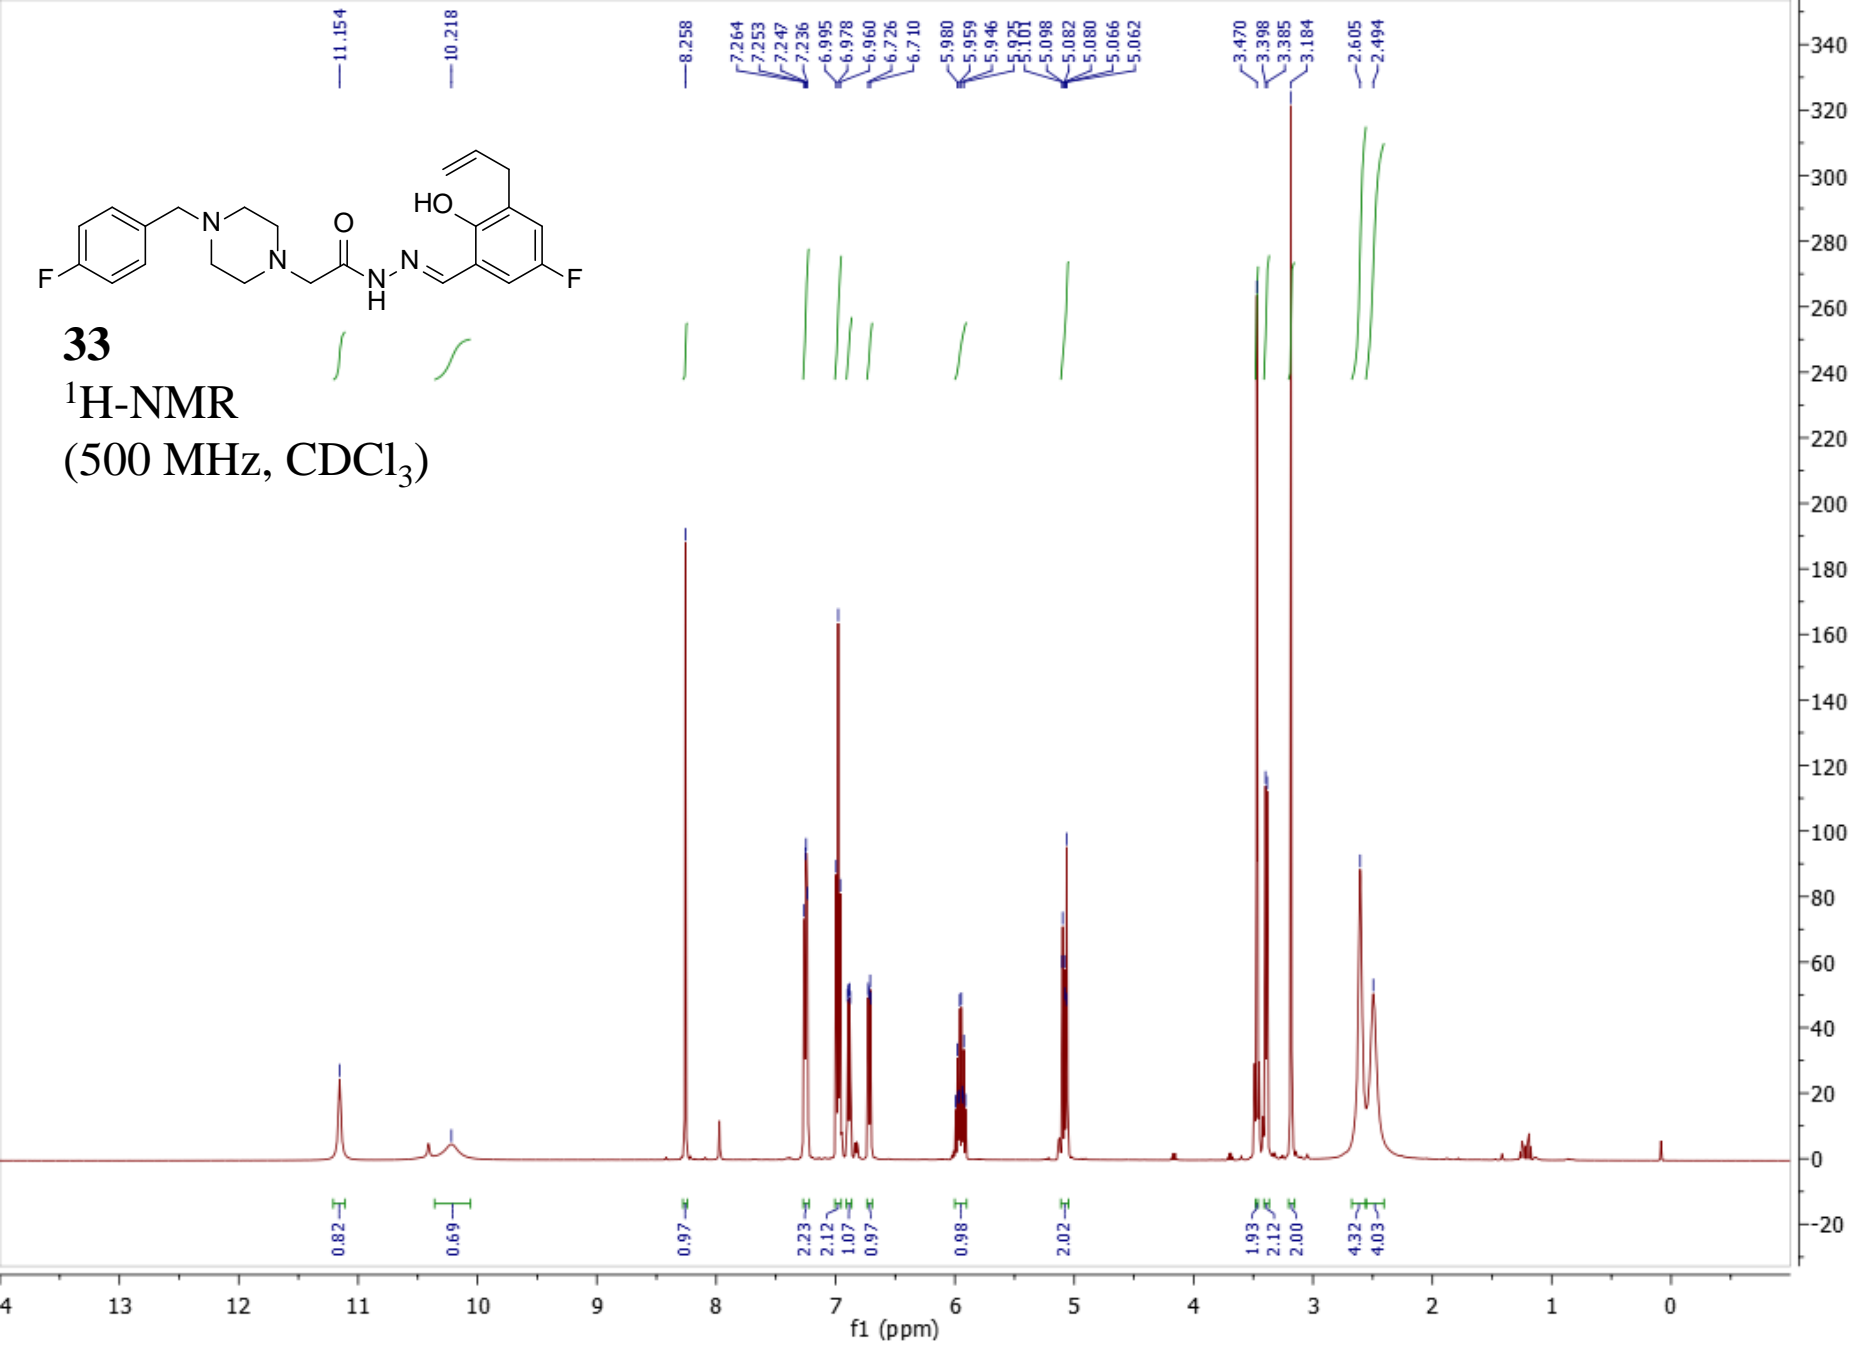

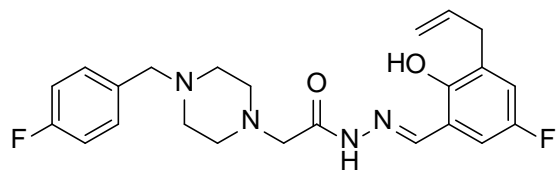

**33**

$^{13}\text{C}$ -NMR

(125 MHz,  $\text{CDCl}_3$ )

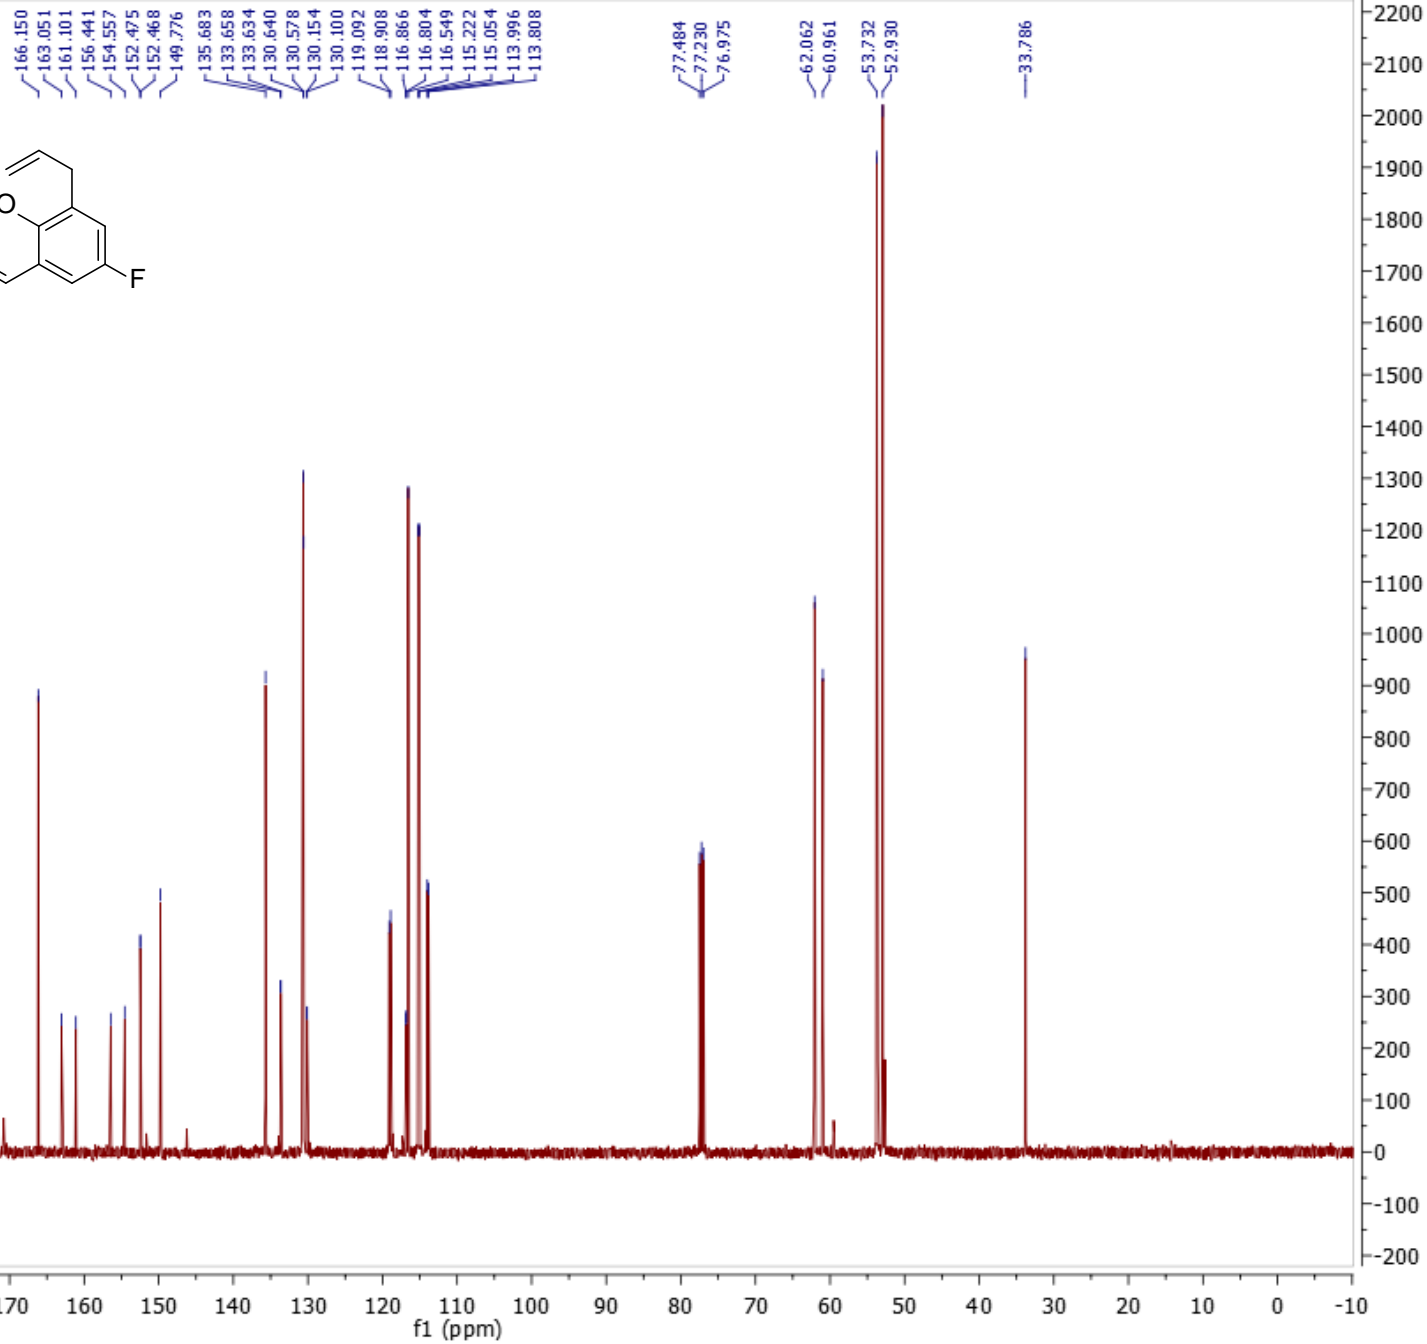

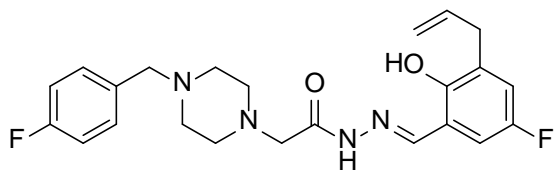

**33**

<sup>19</sup>F-NMR

(470 MHz, CDCl<sub>3</sub>)

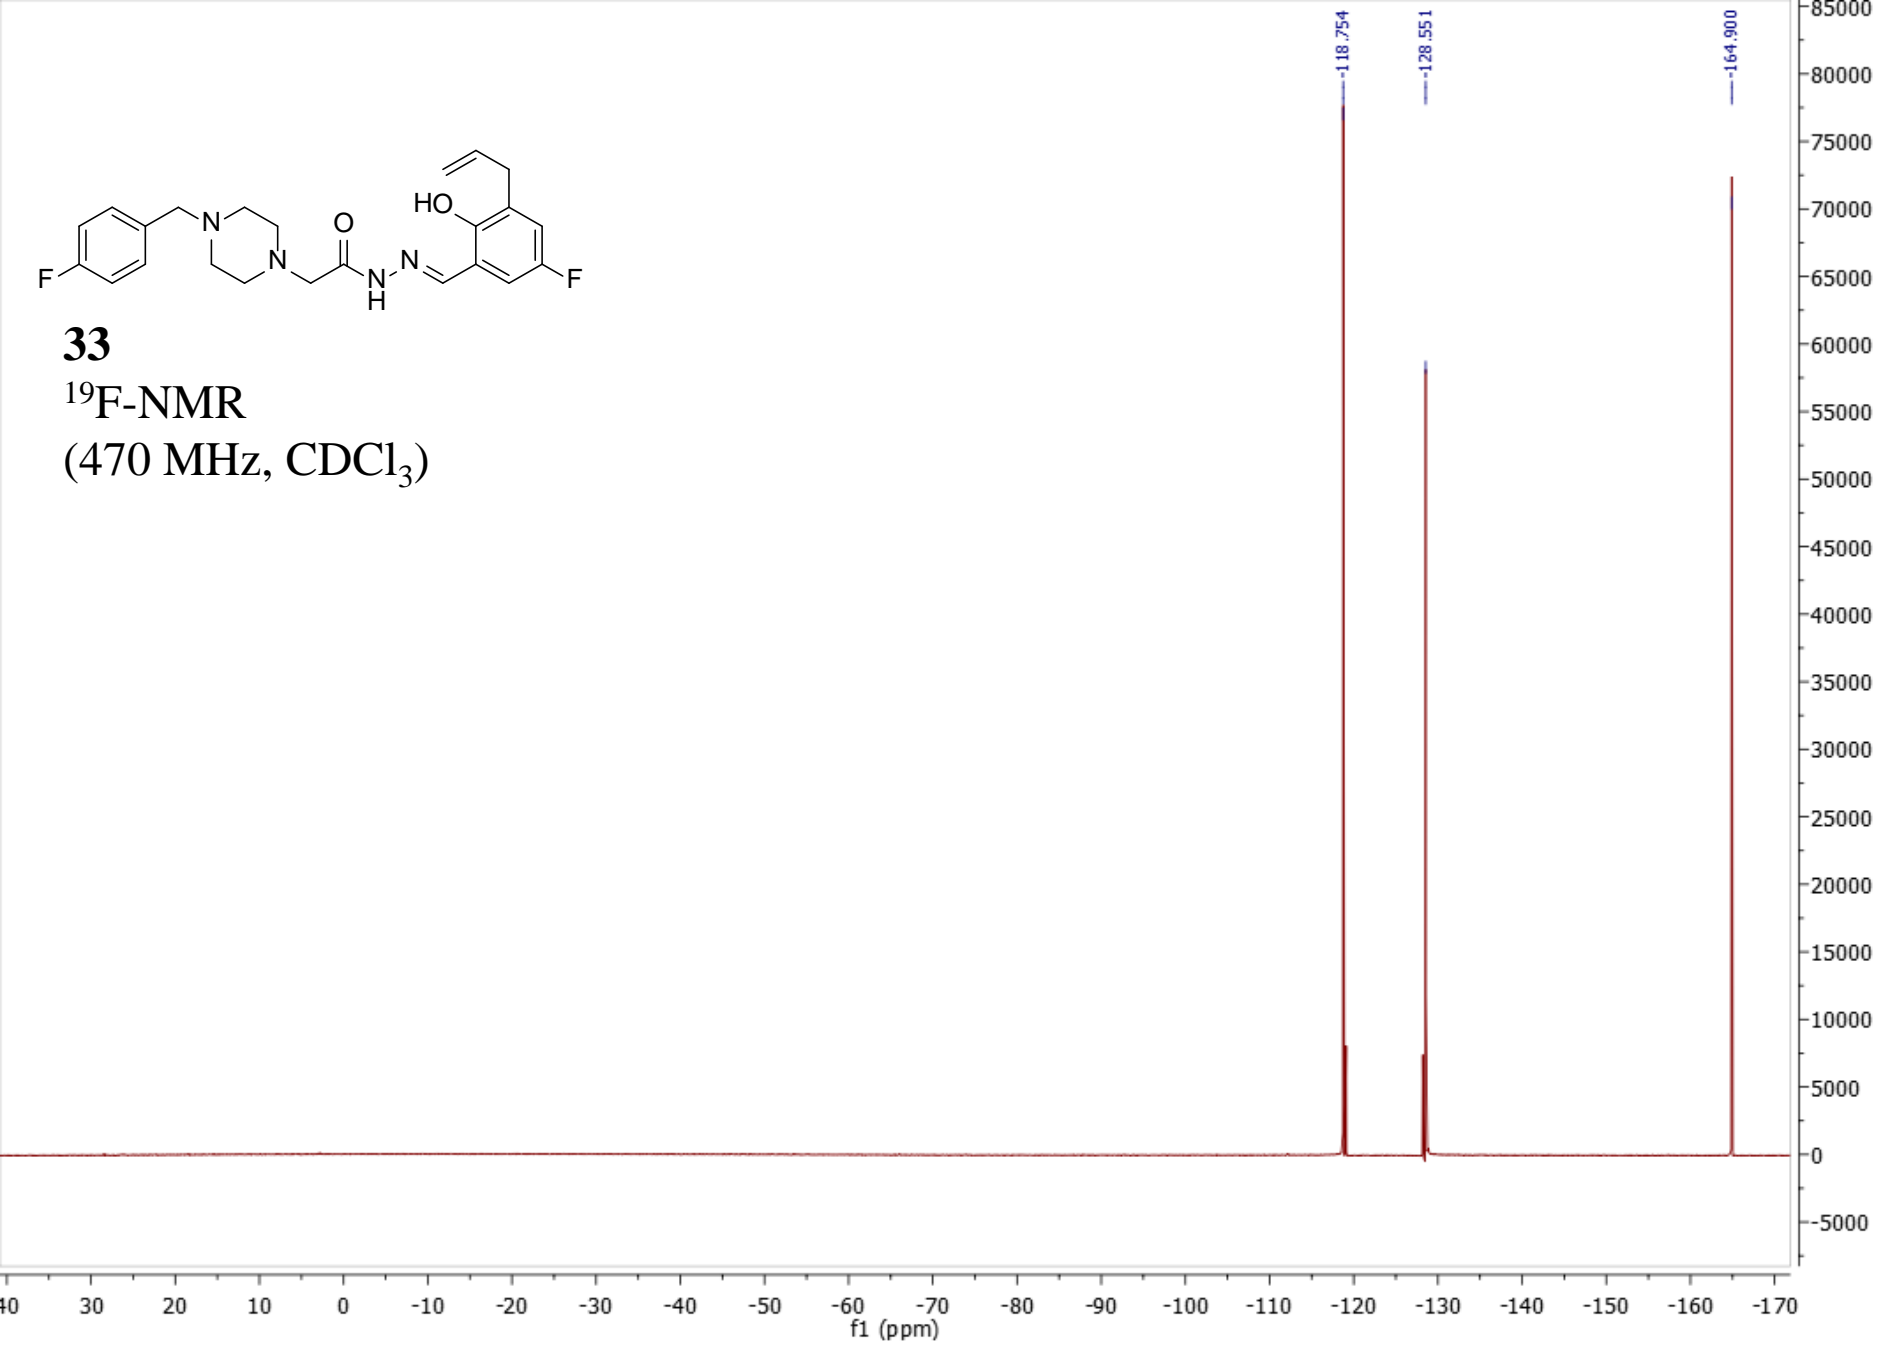

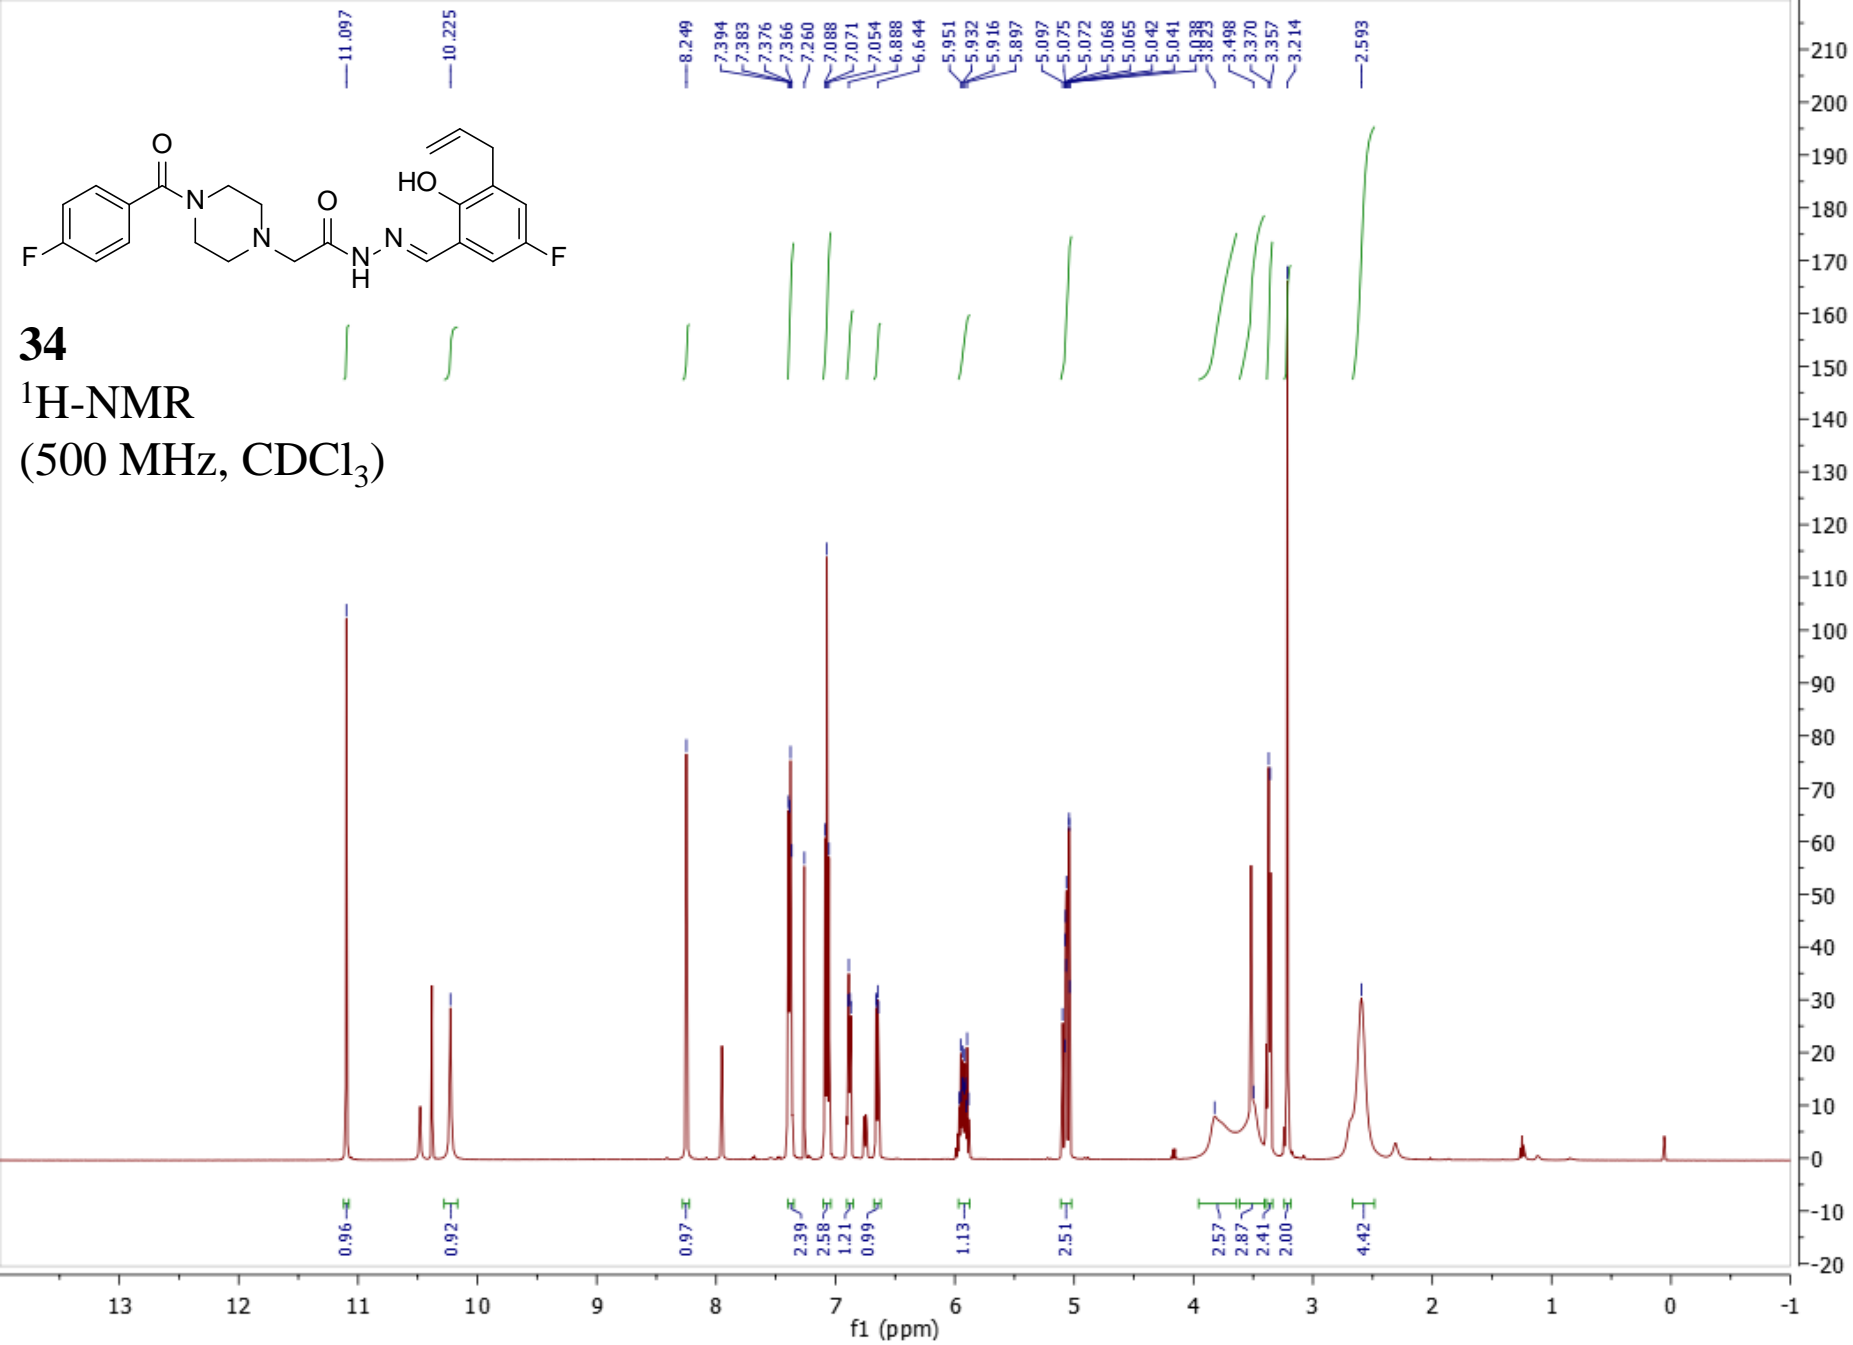

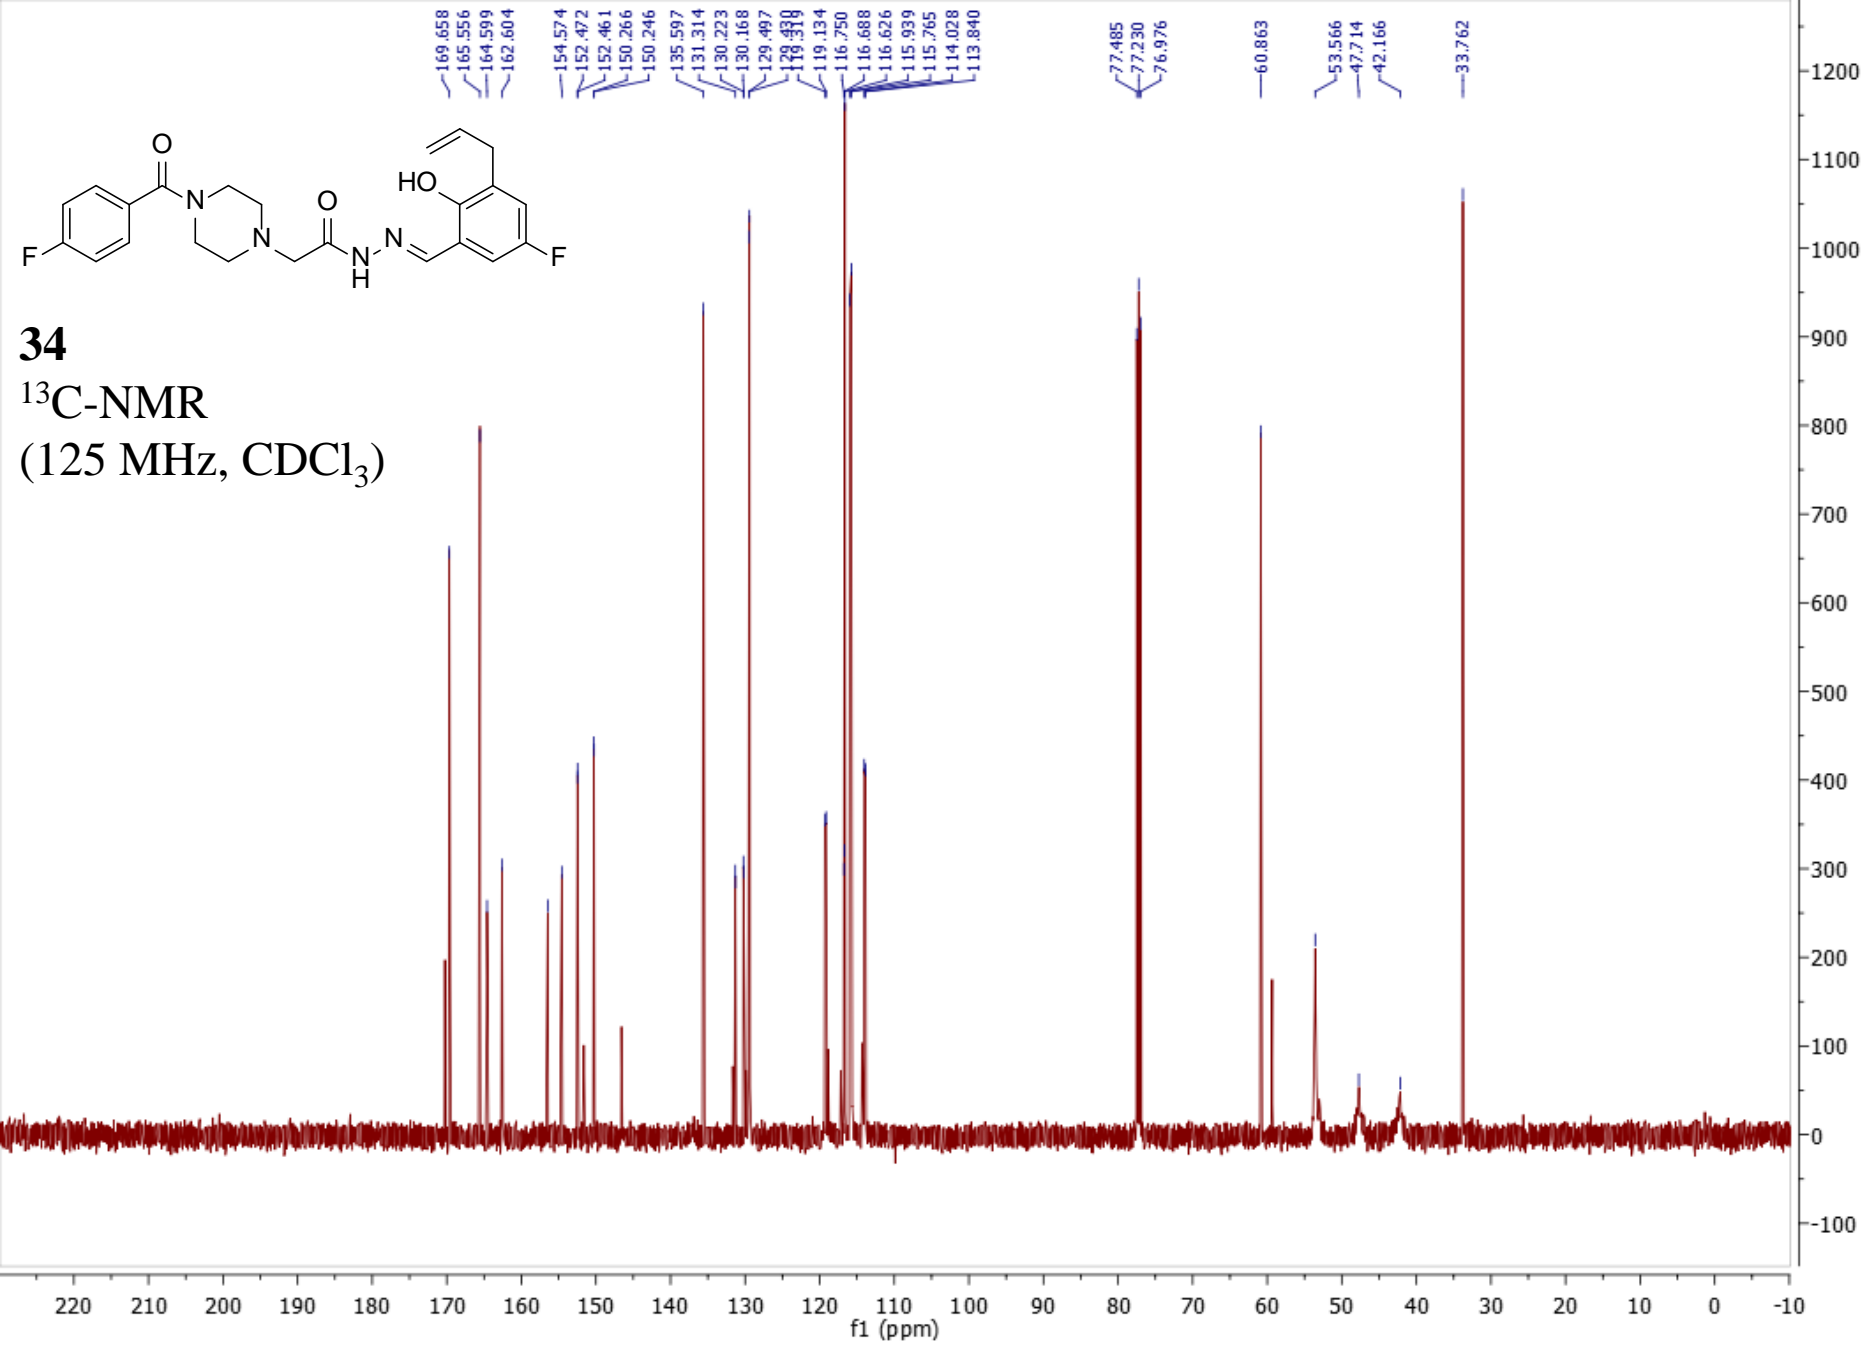

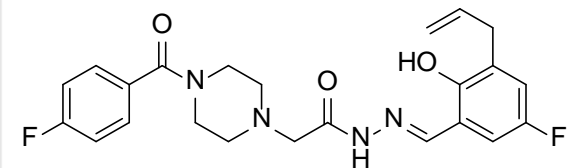

**34**

$^{19}\text{F}$ -NMR  
(470 MHz,  $\text{CDCl}_3$ )

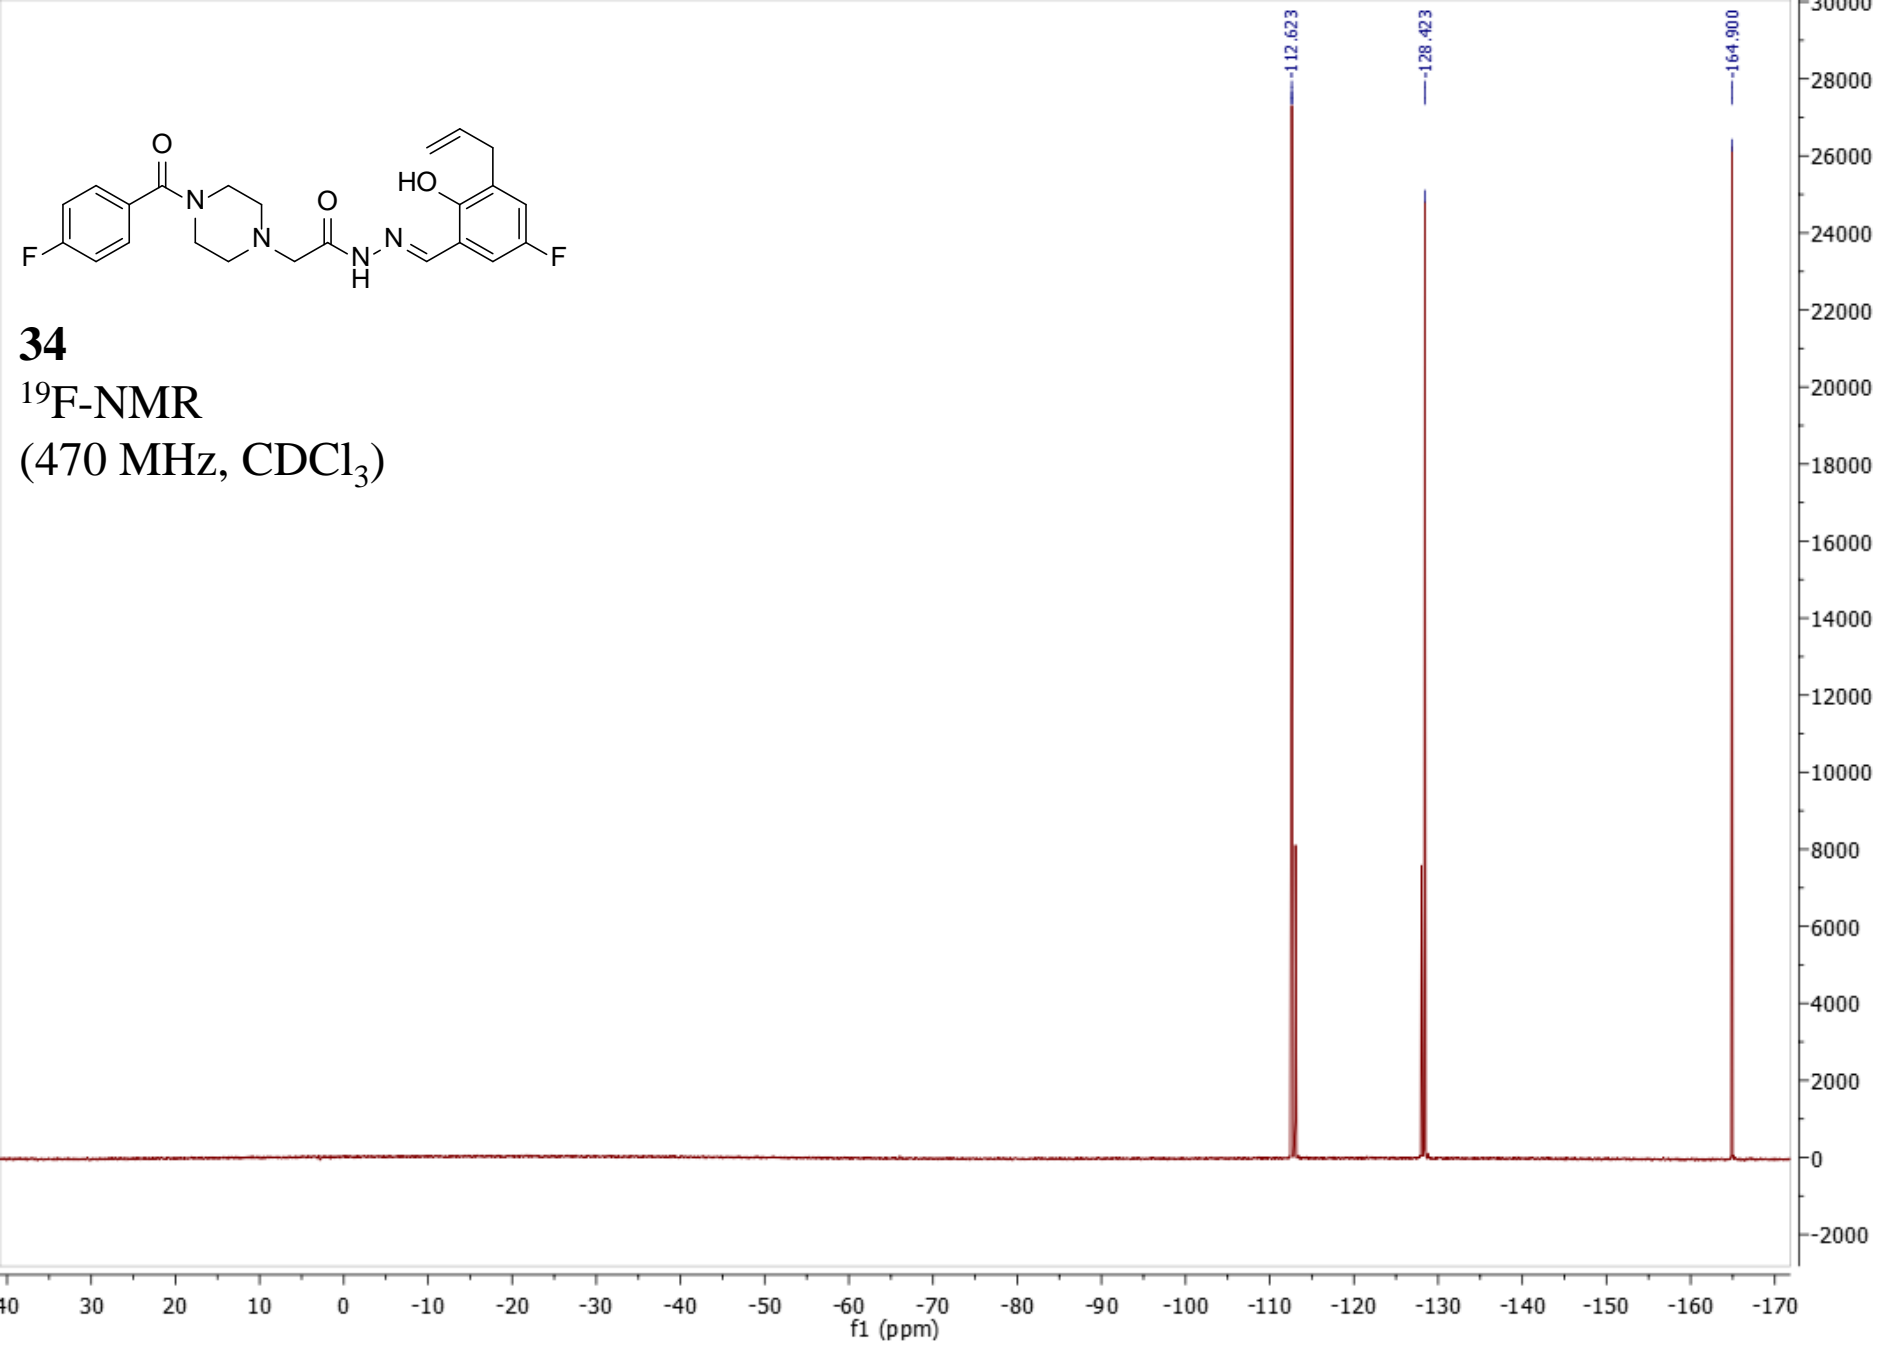

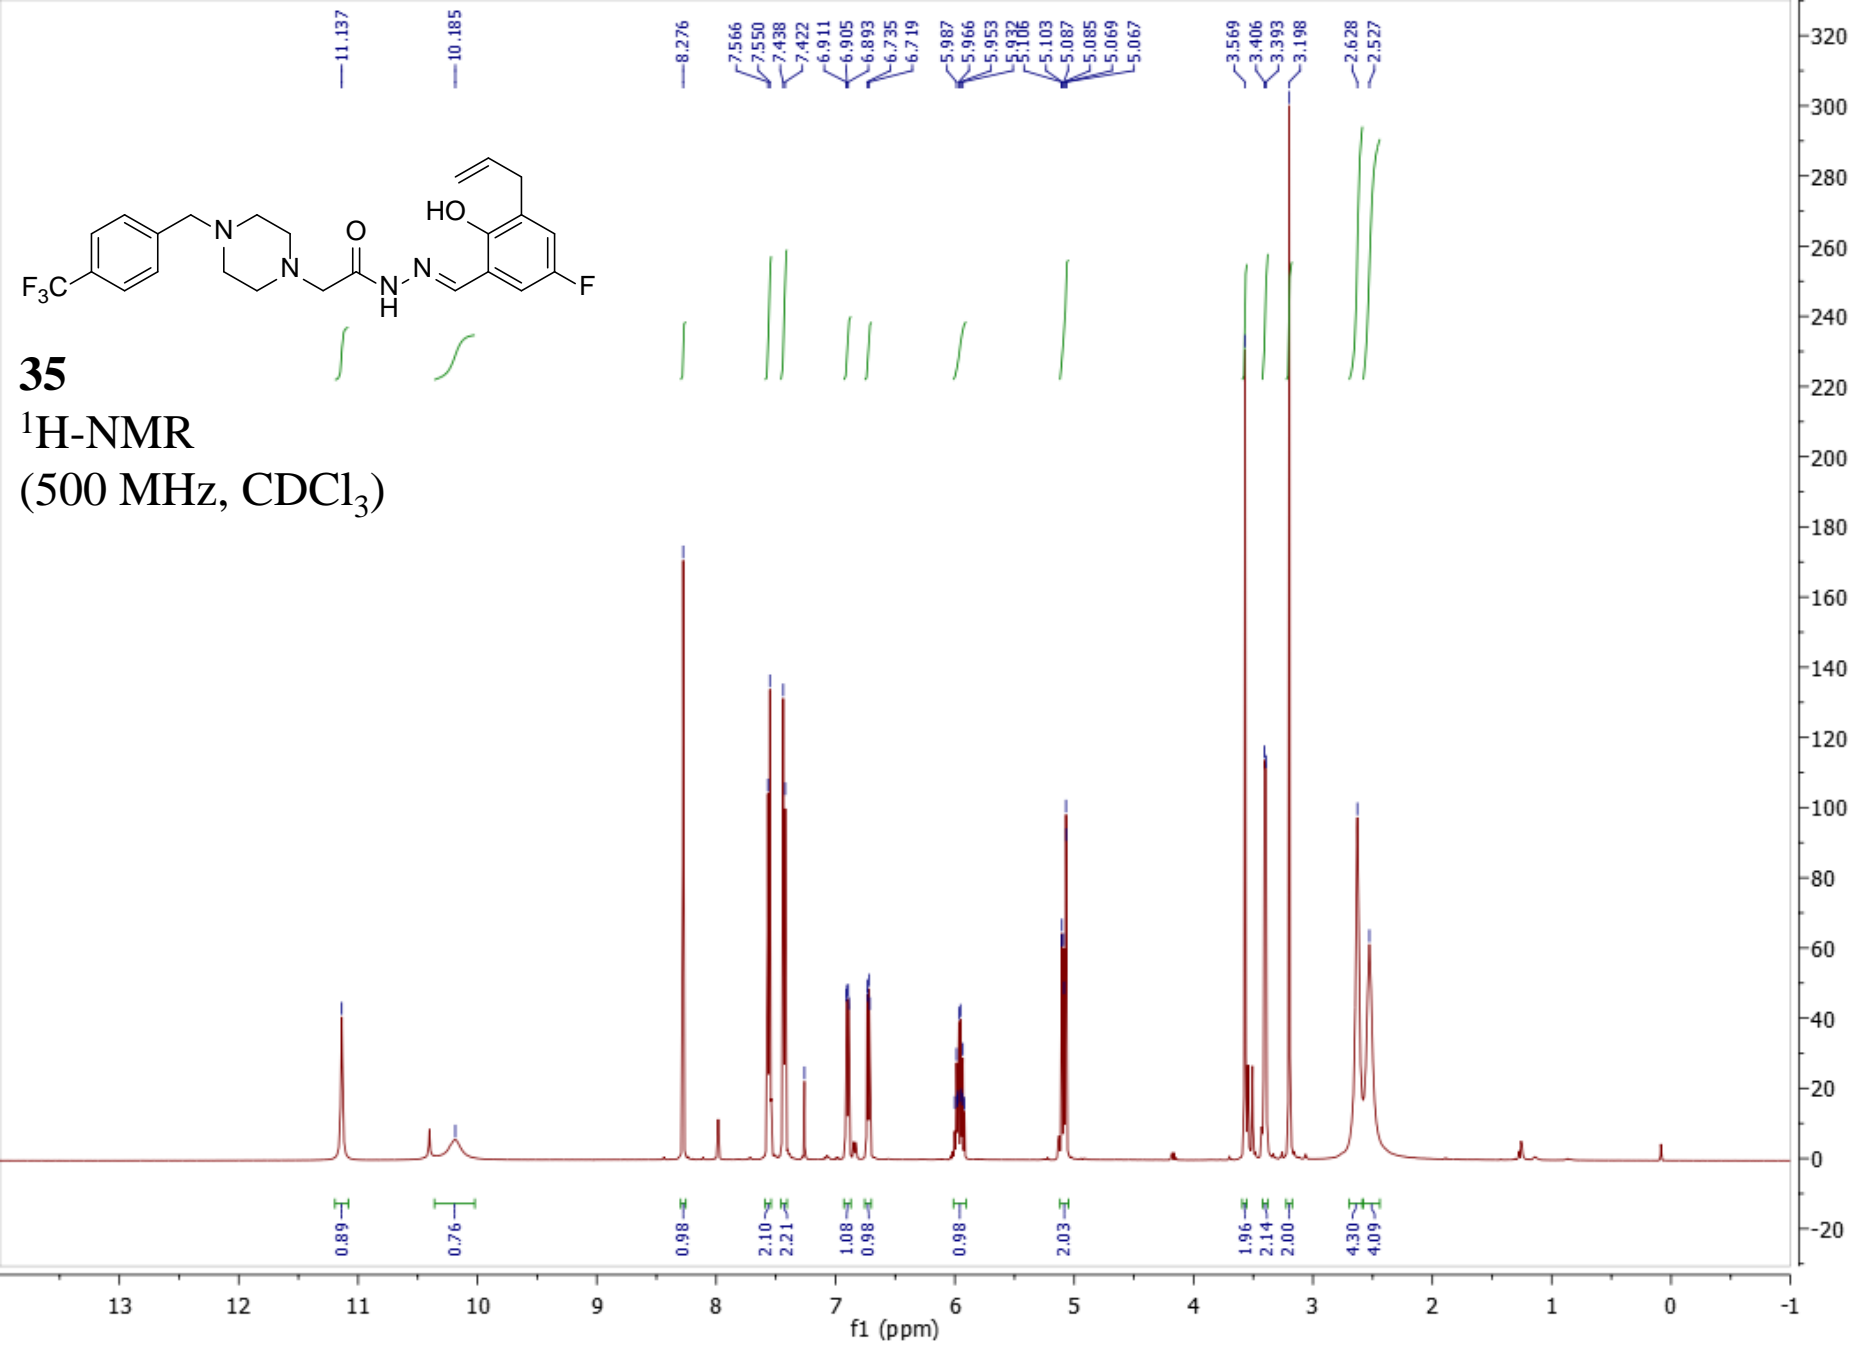

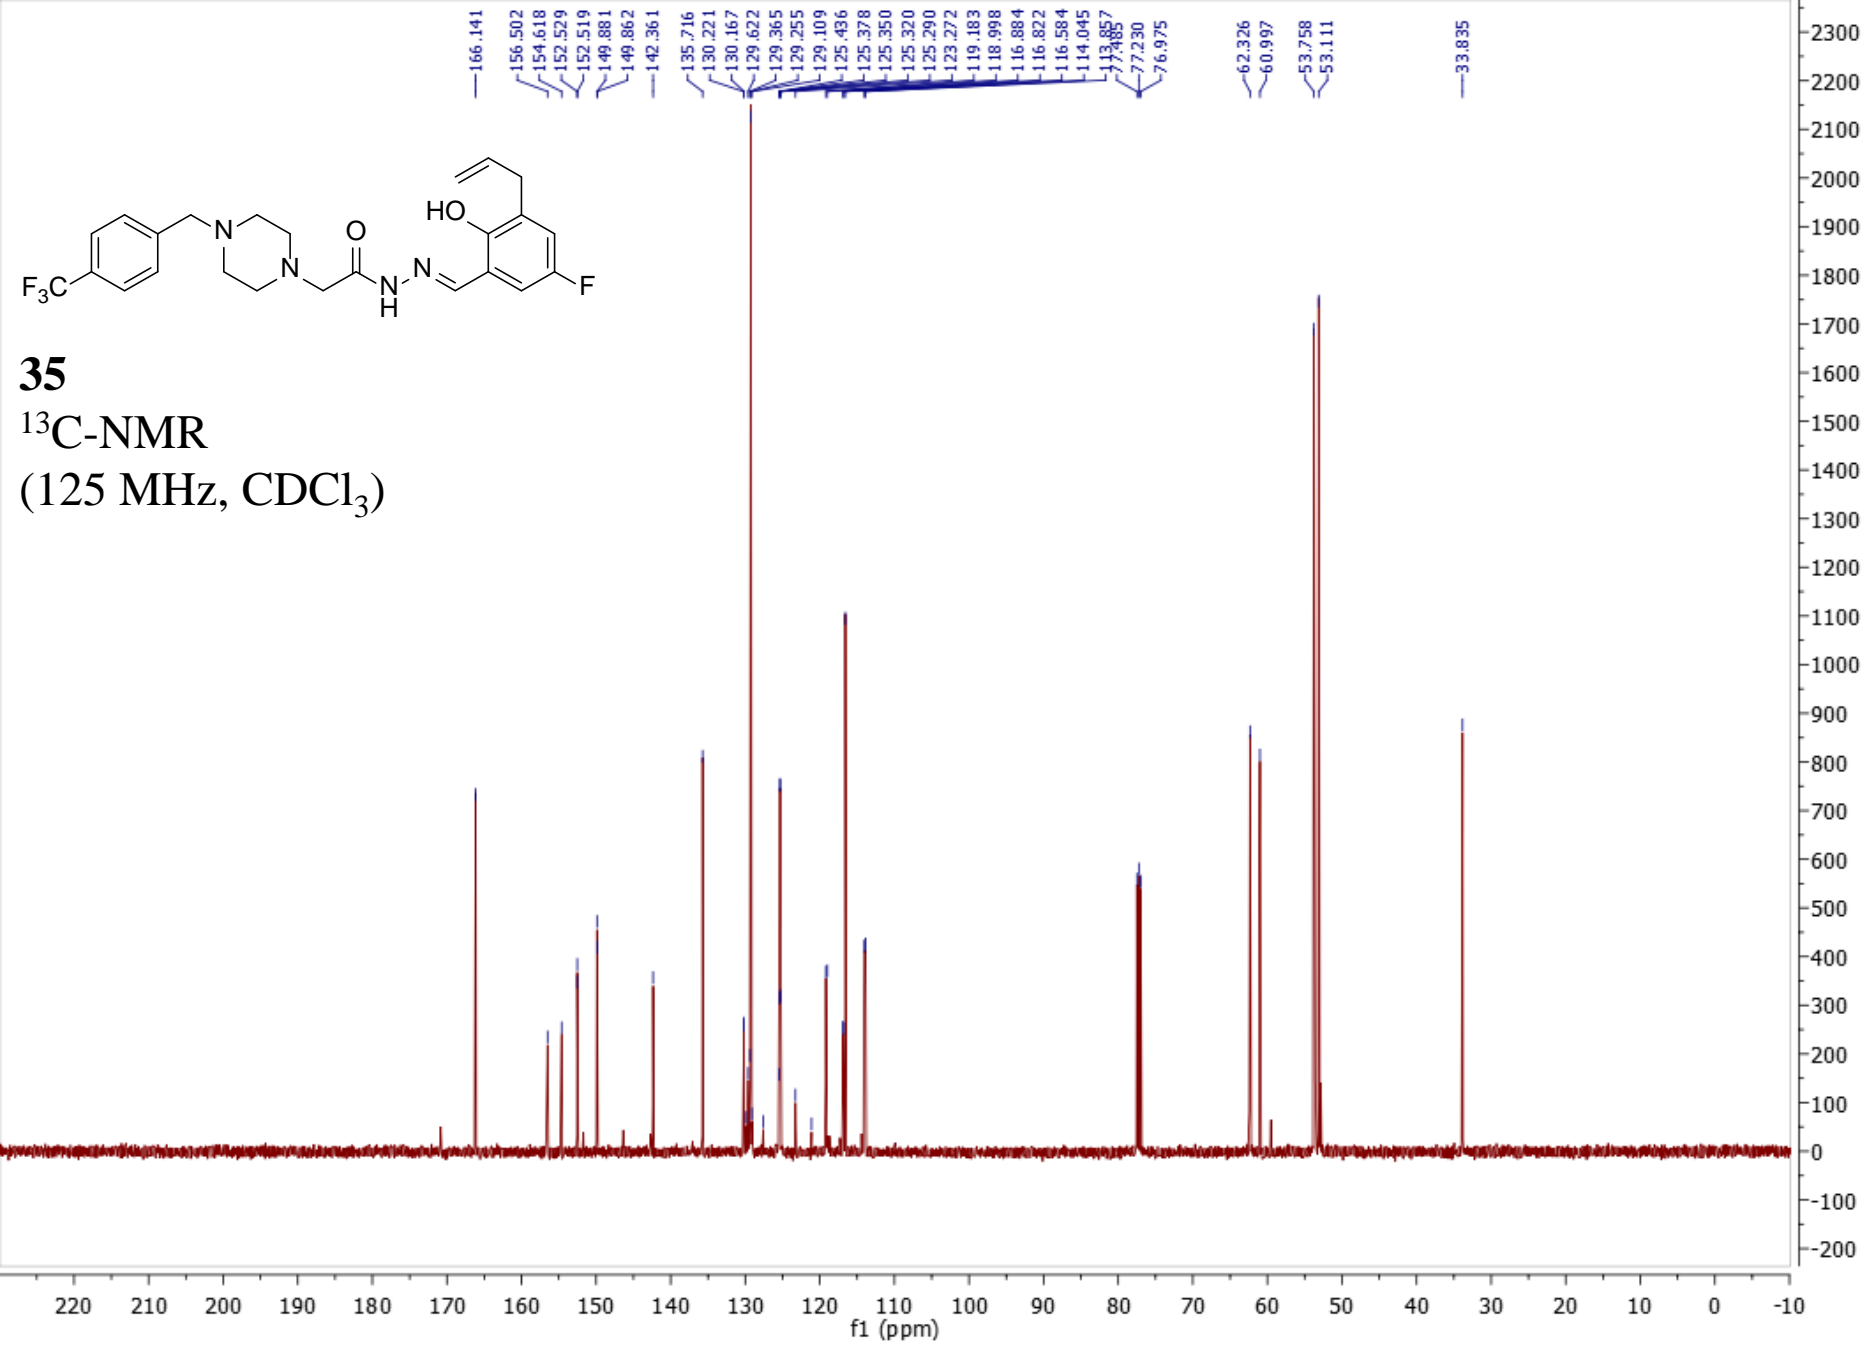



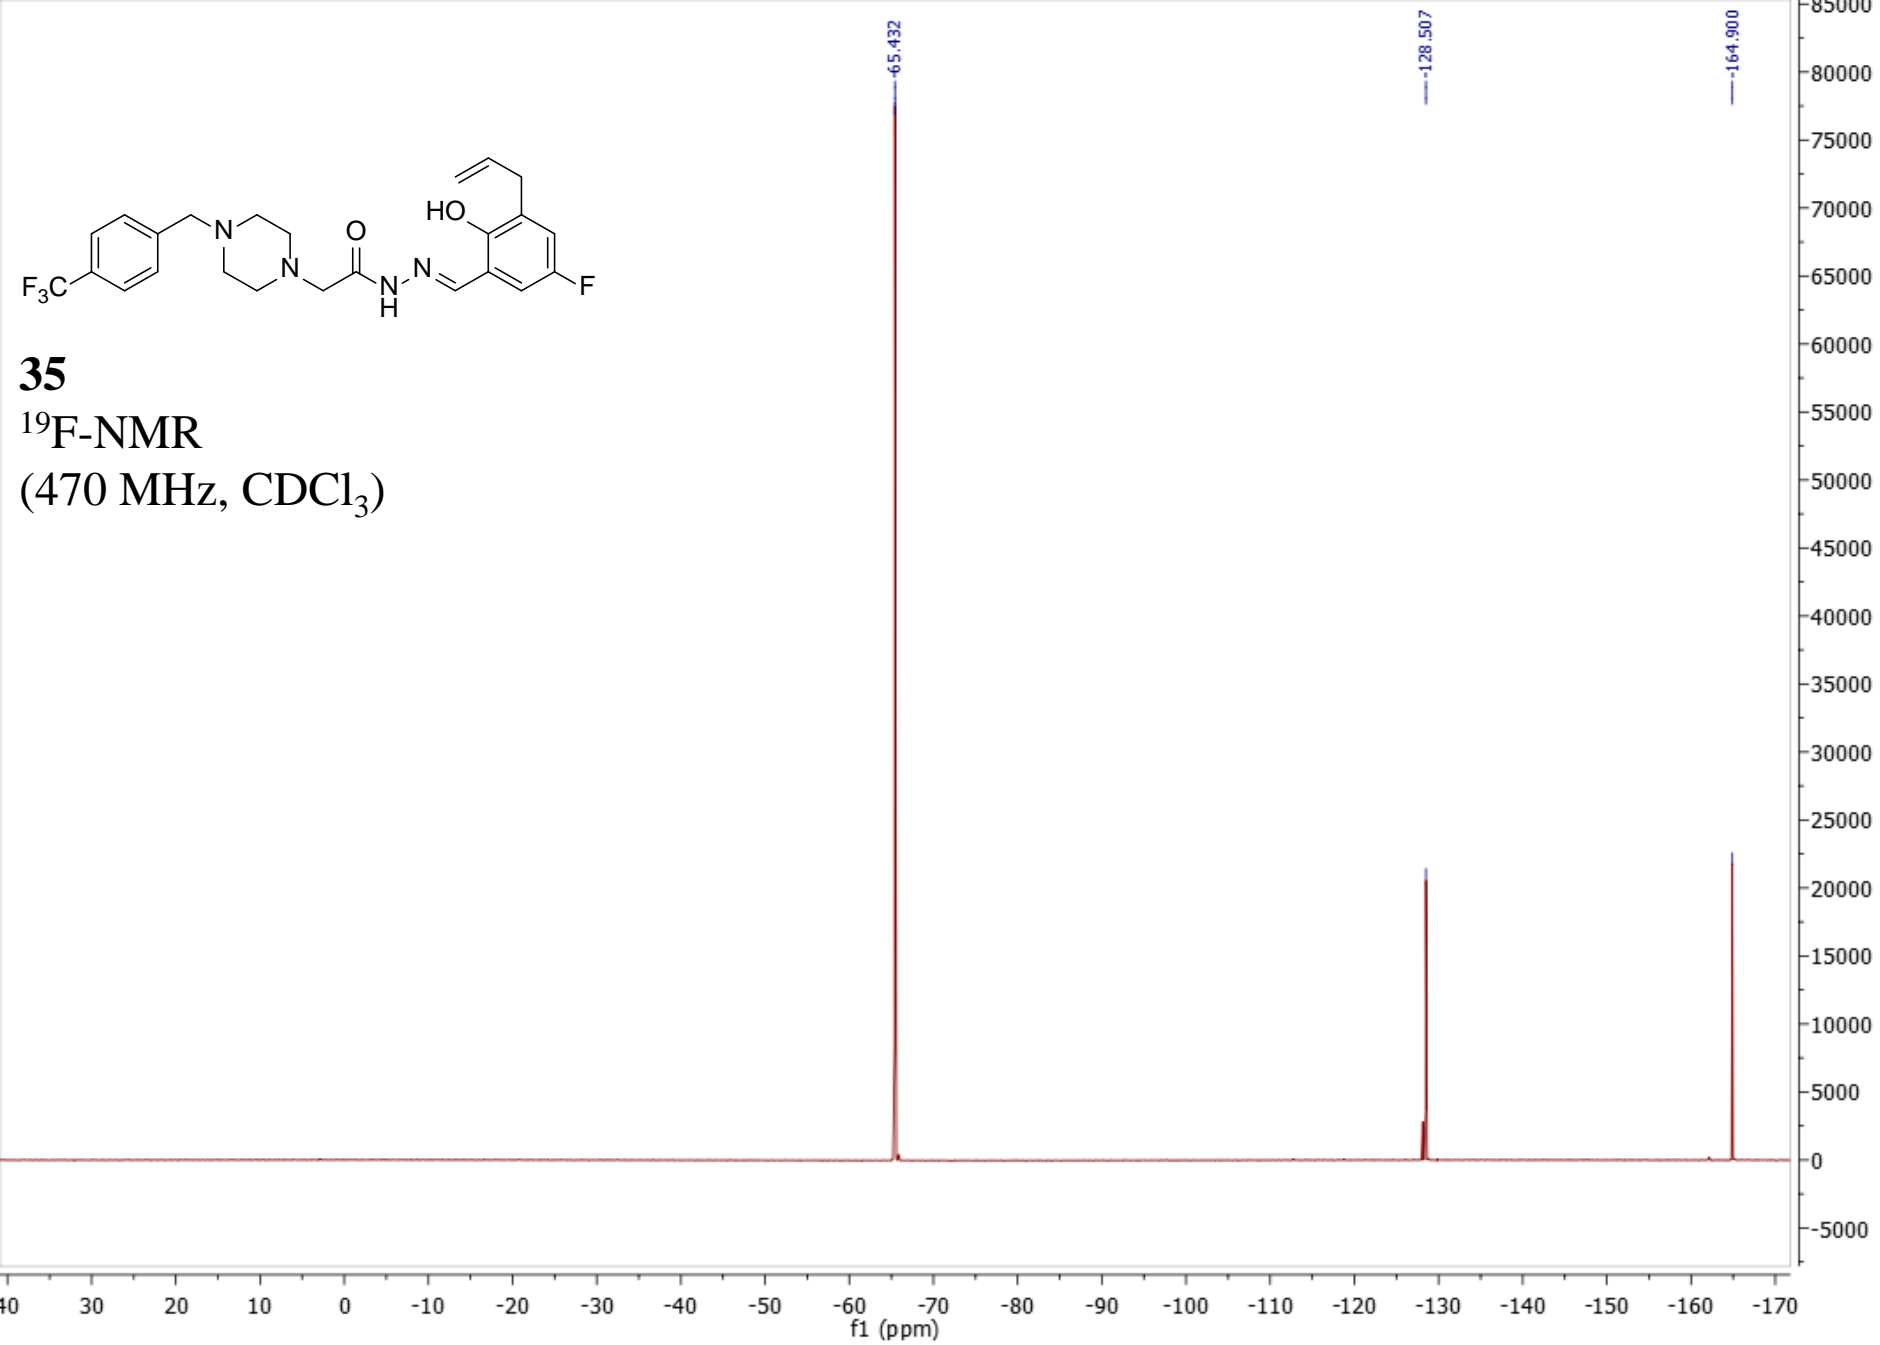

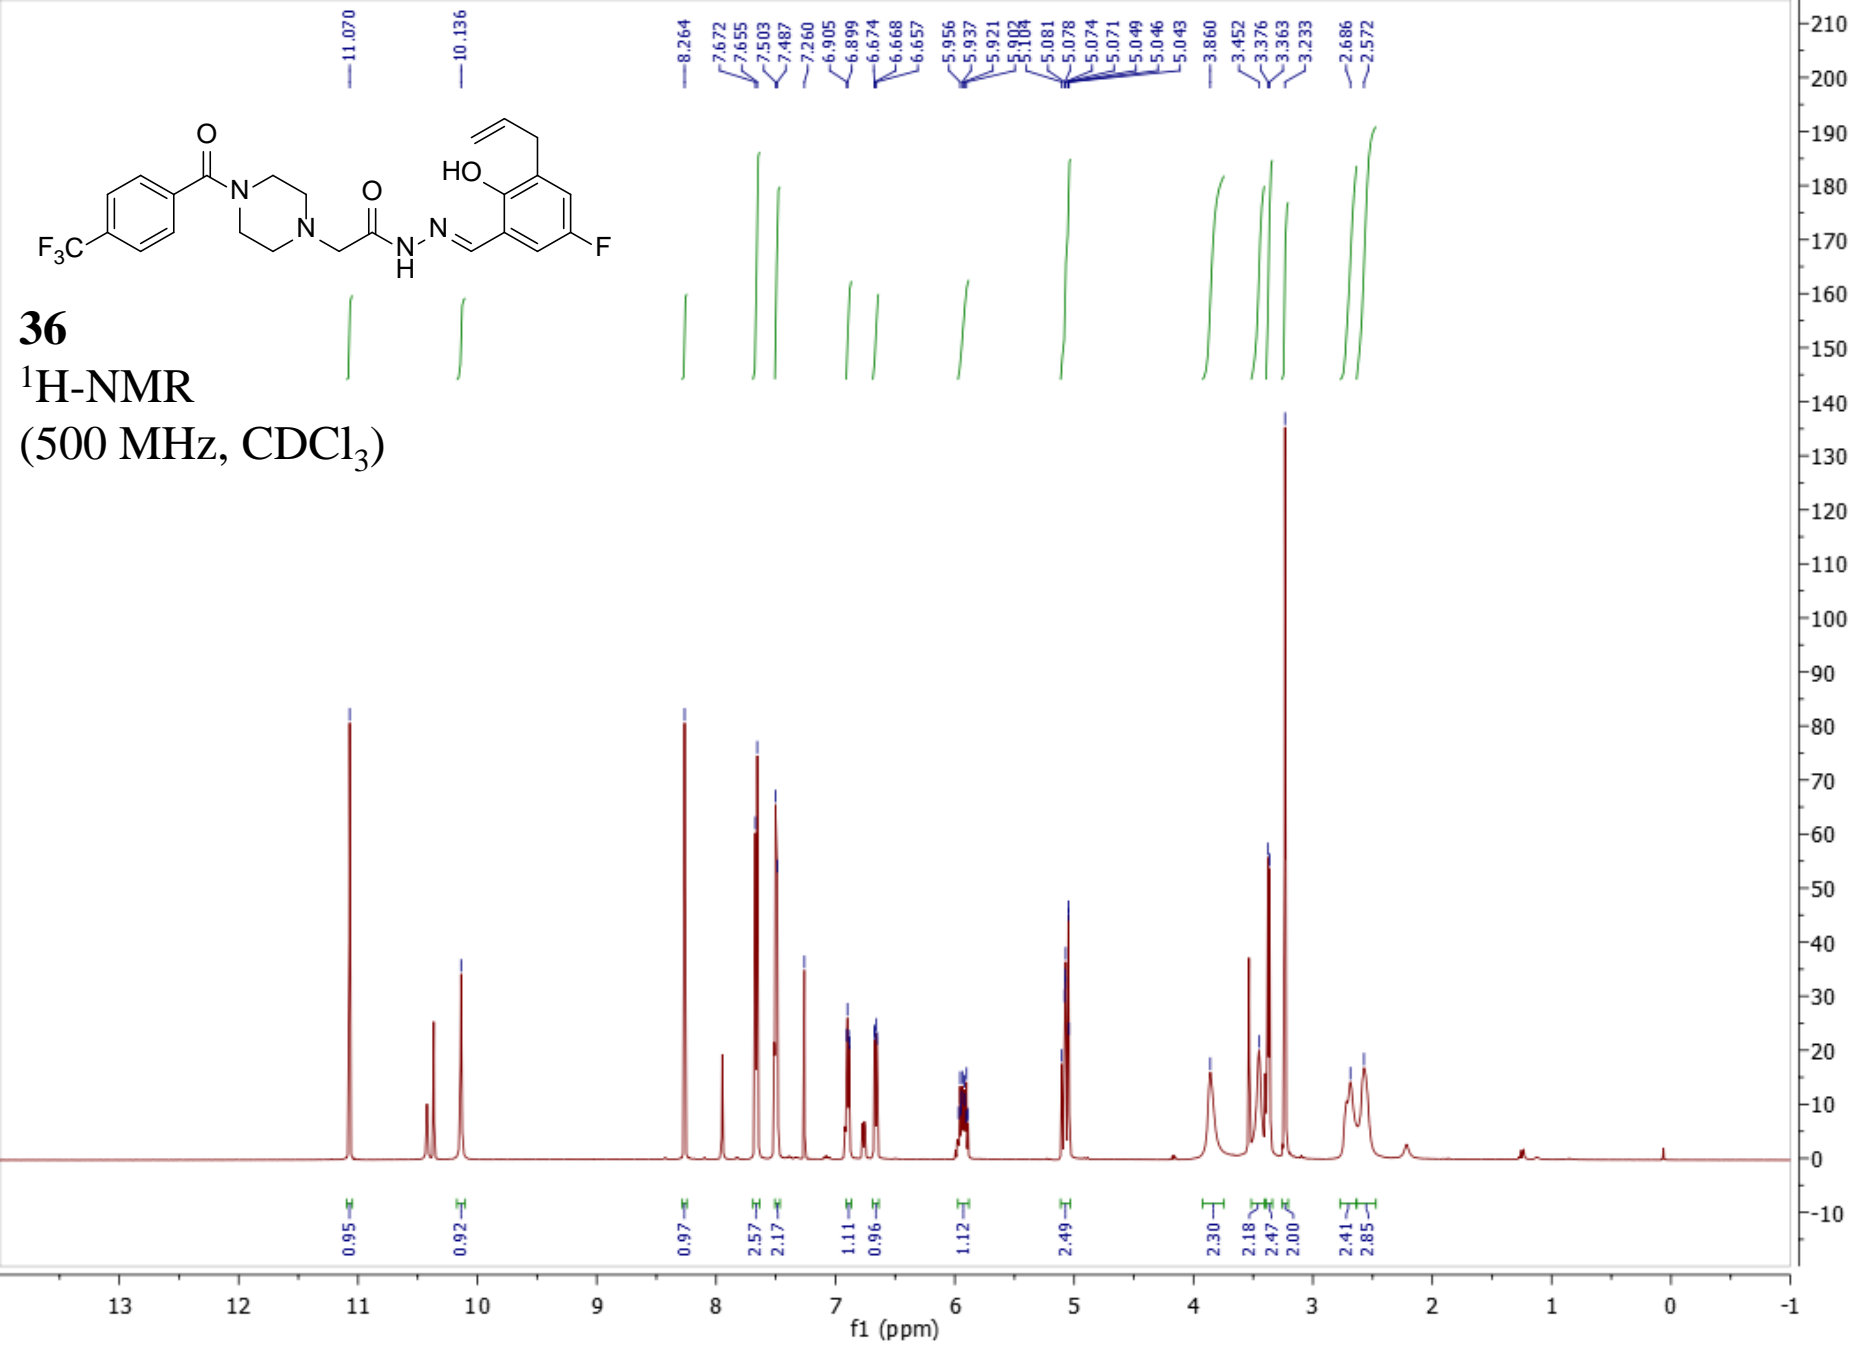

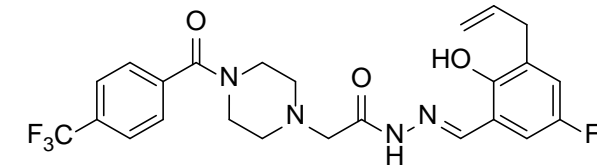

**36**  
<sup>13</sup>C-NMR  
 (125 MHz, CDCl<sub>3</sub>)

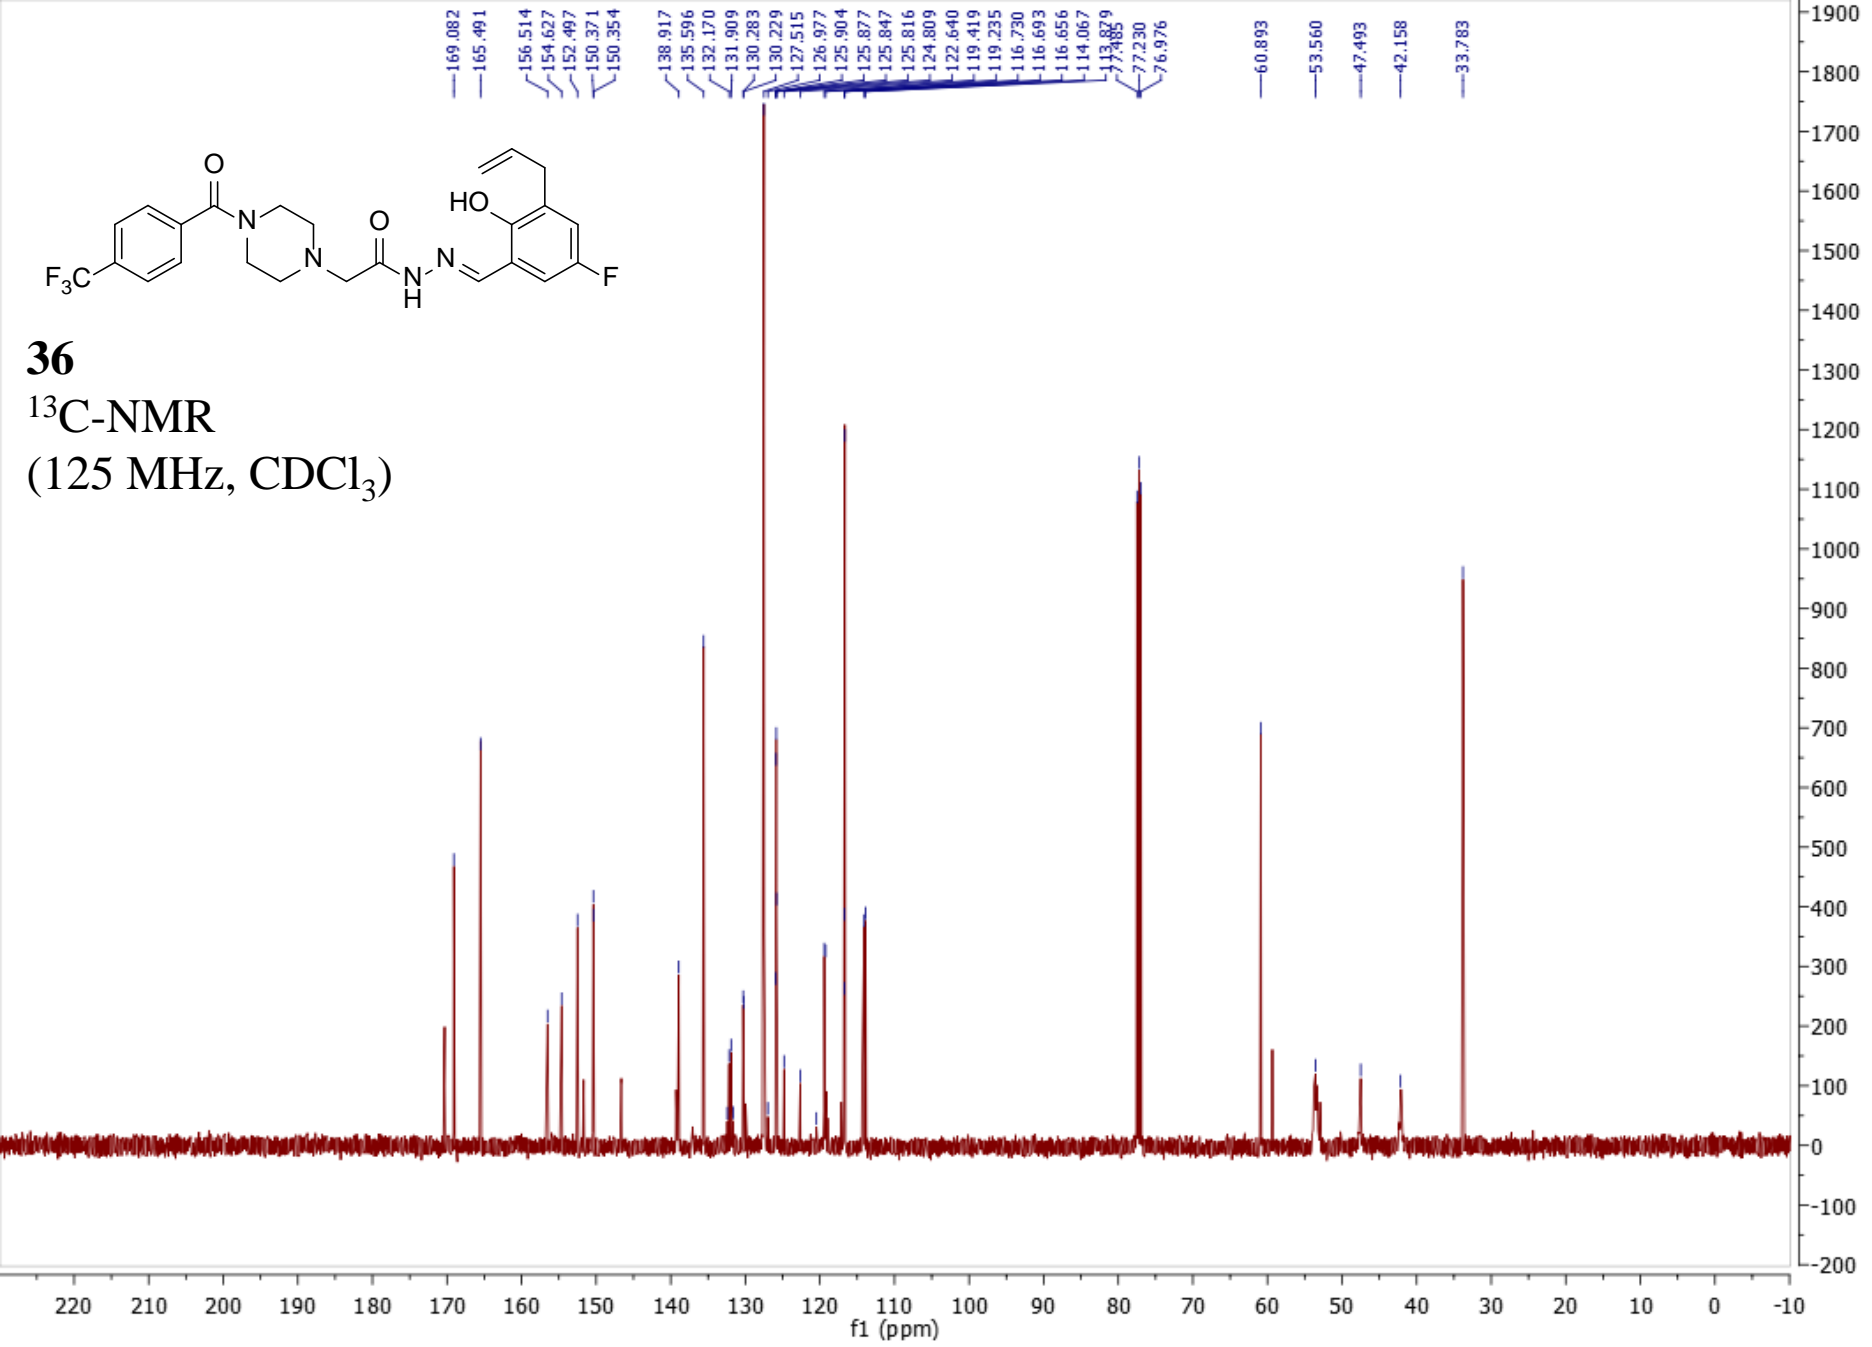

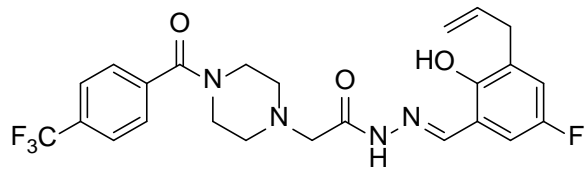

**36**

<sup>19</sup>F-NMR

(470 MHz, CDCl<sub>3</sub>)

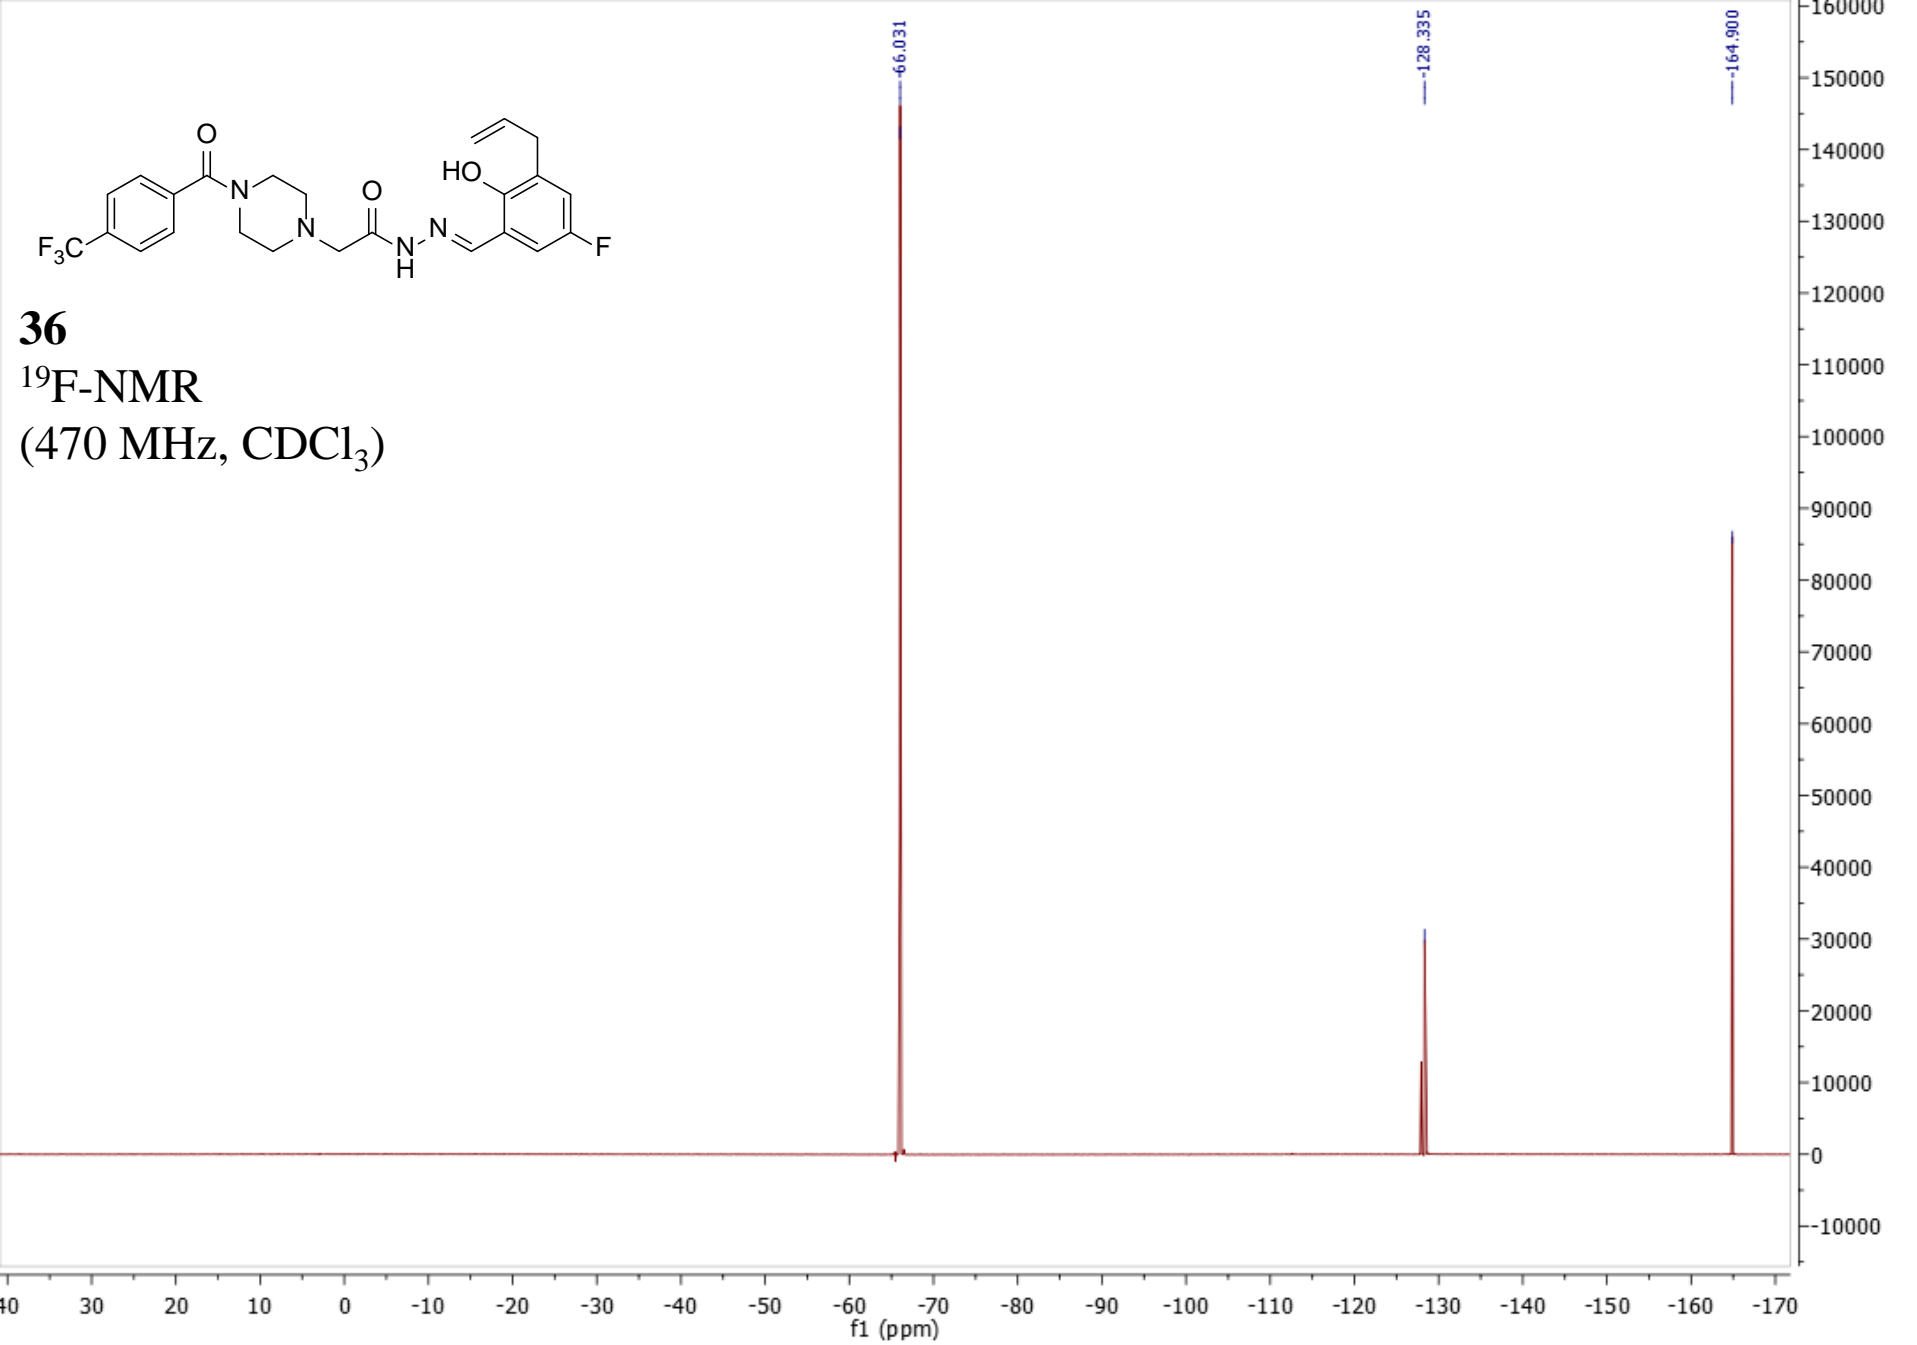

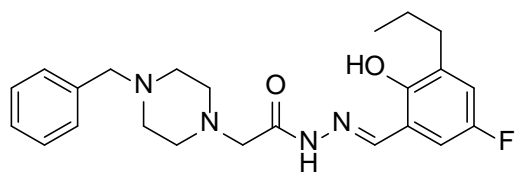

**37**

$^1\text{H-NMR}$

(500 MHz,  $\text{CDCl}_3$ )

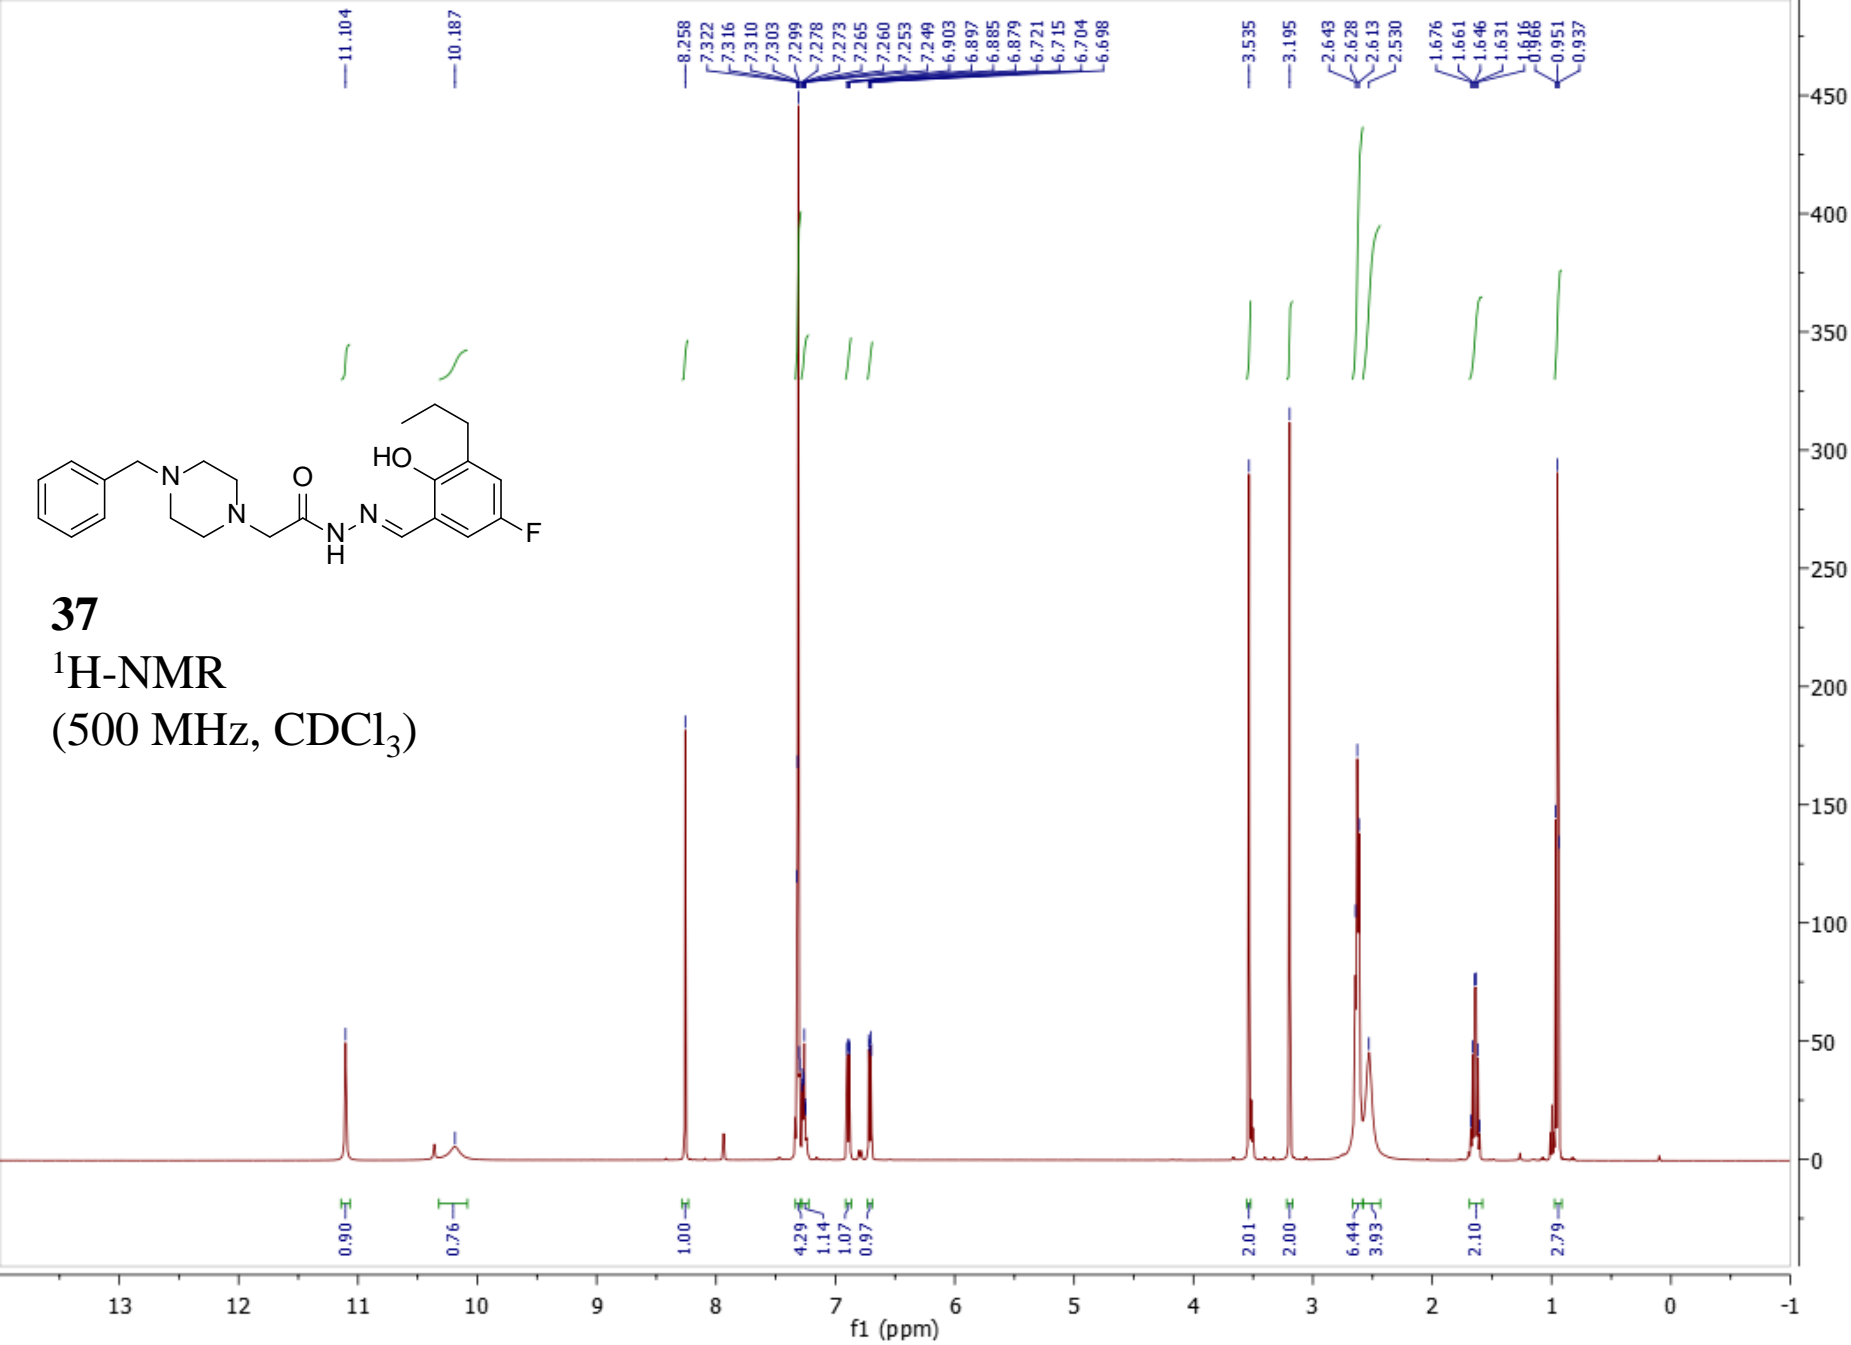

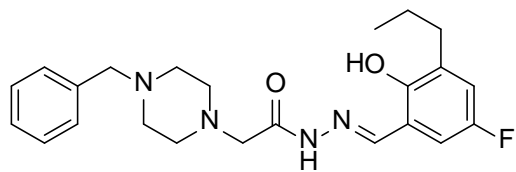

**37**

$^{13}\text{C}$ -NMR

(125 MHz,  $\text{CDCl}_3$ )

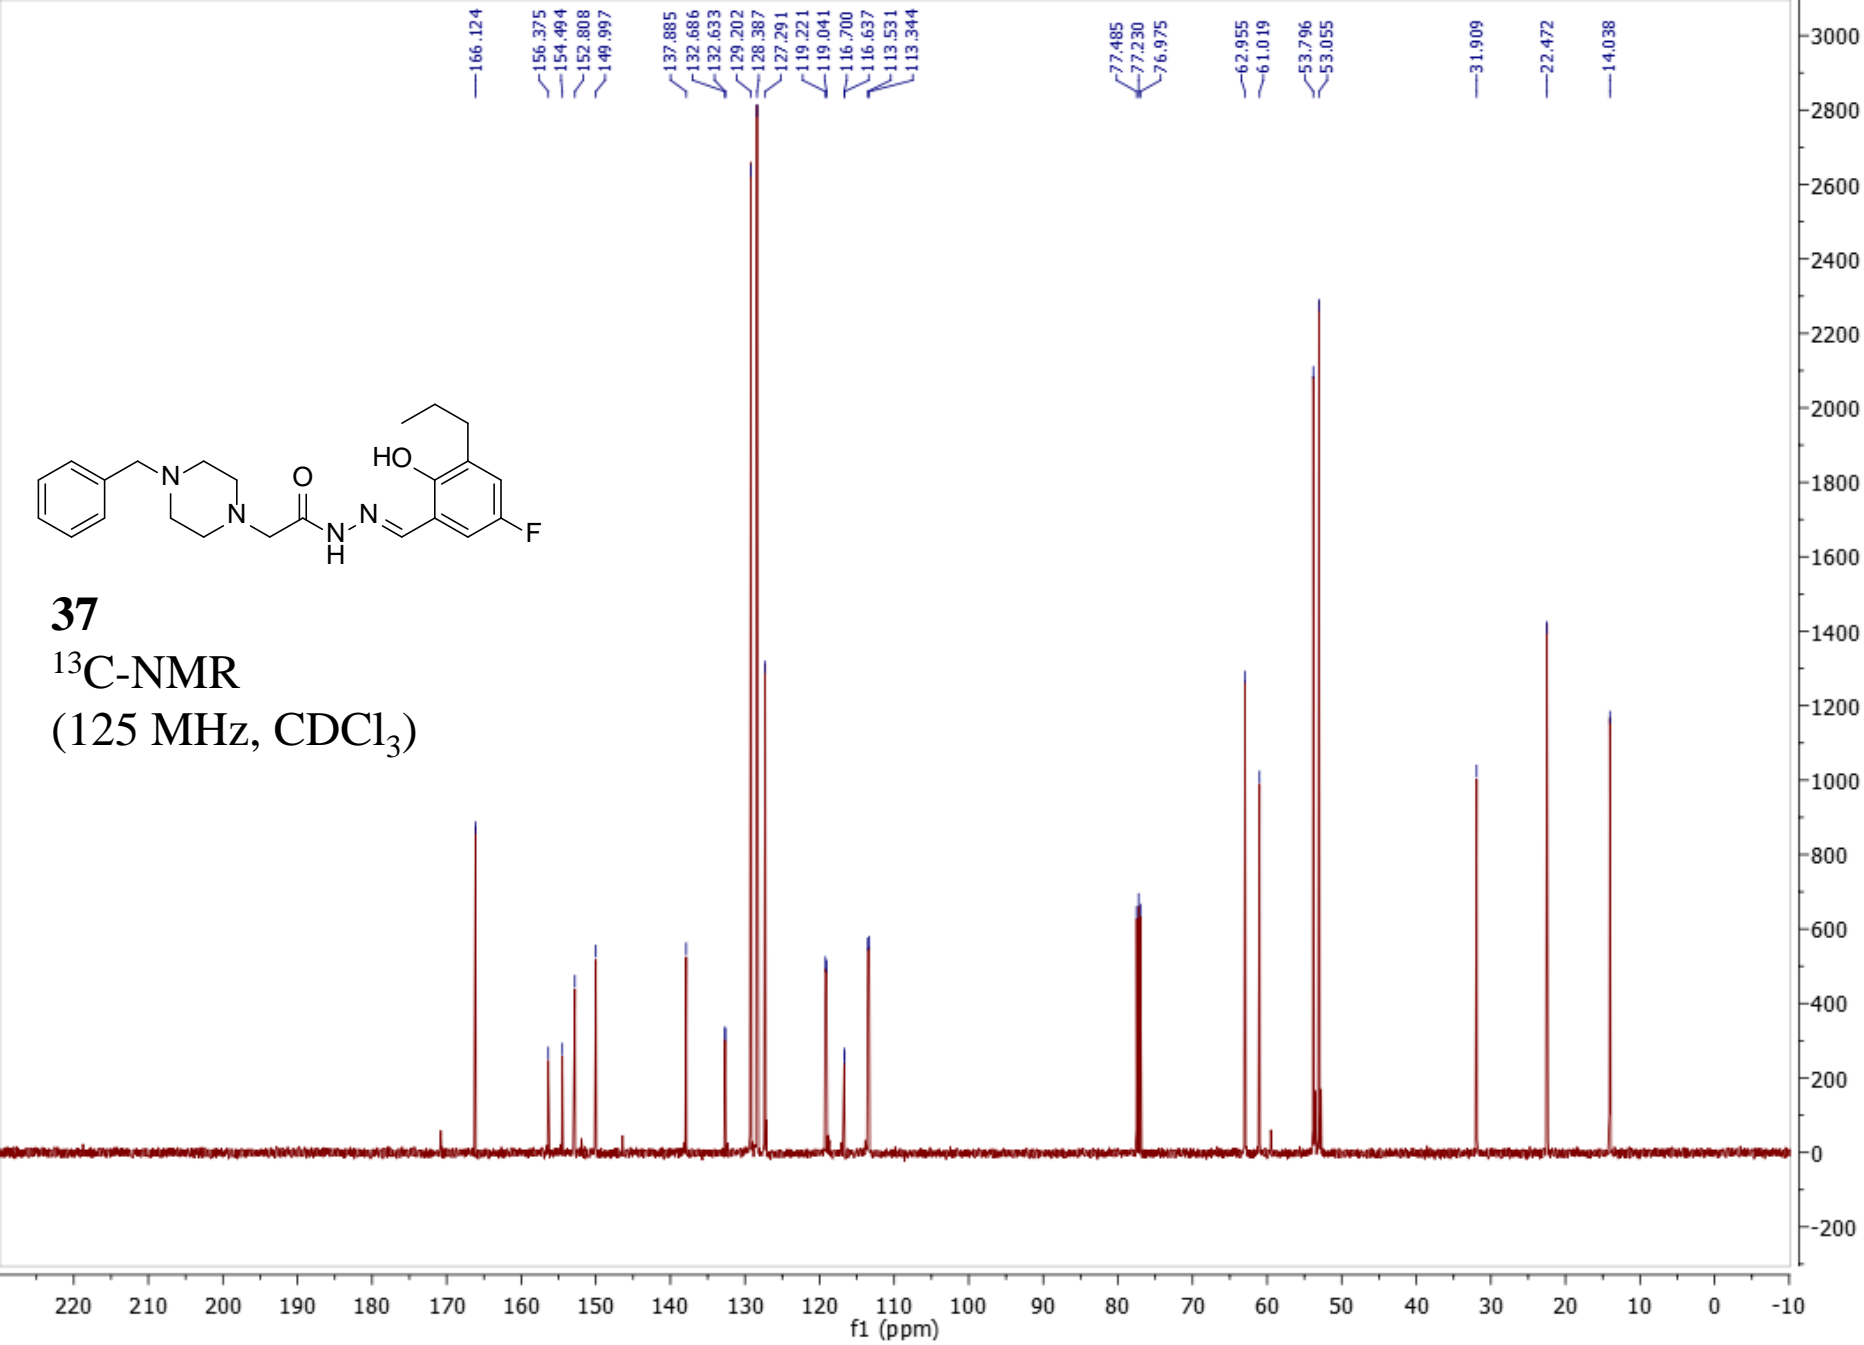



**37**

$^{19}\text{F}$ -NMR

(470 MHz,  $\text{CDCl}_3$ )

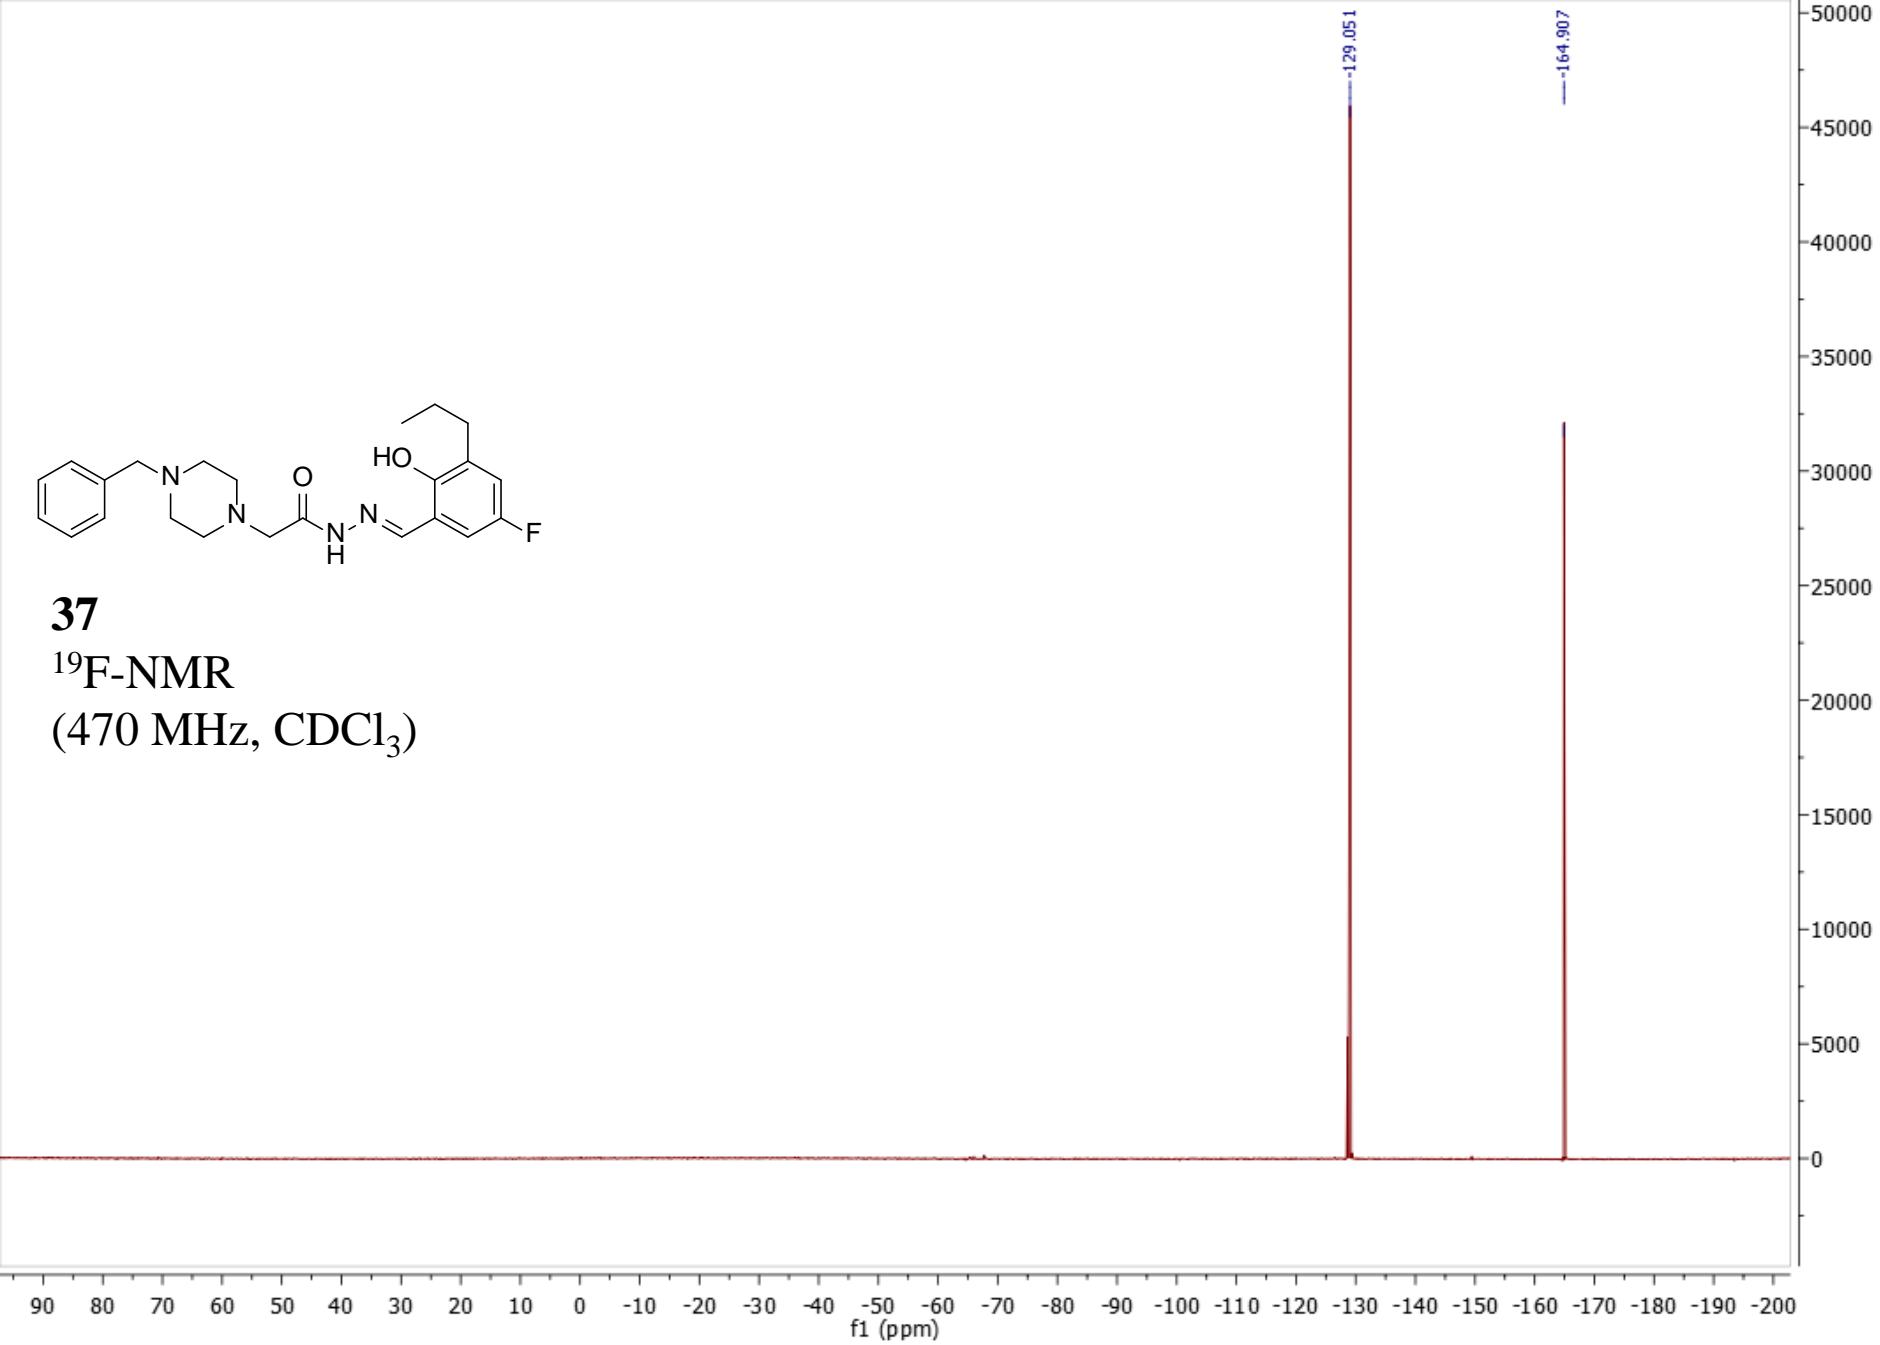

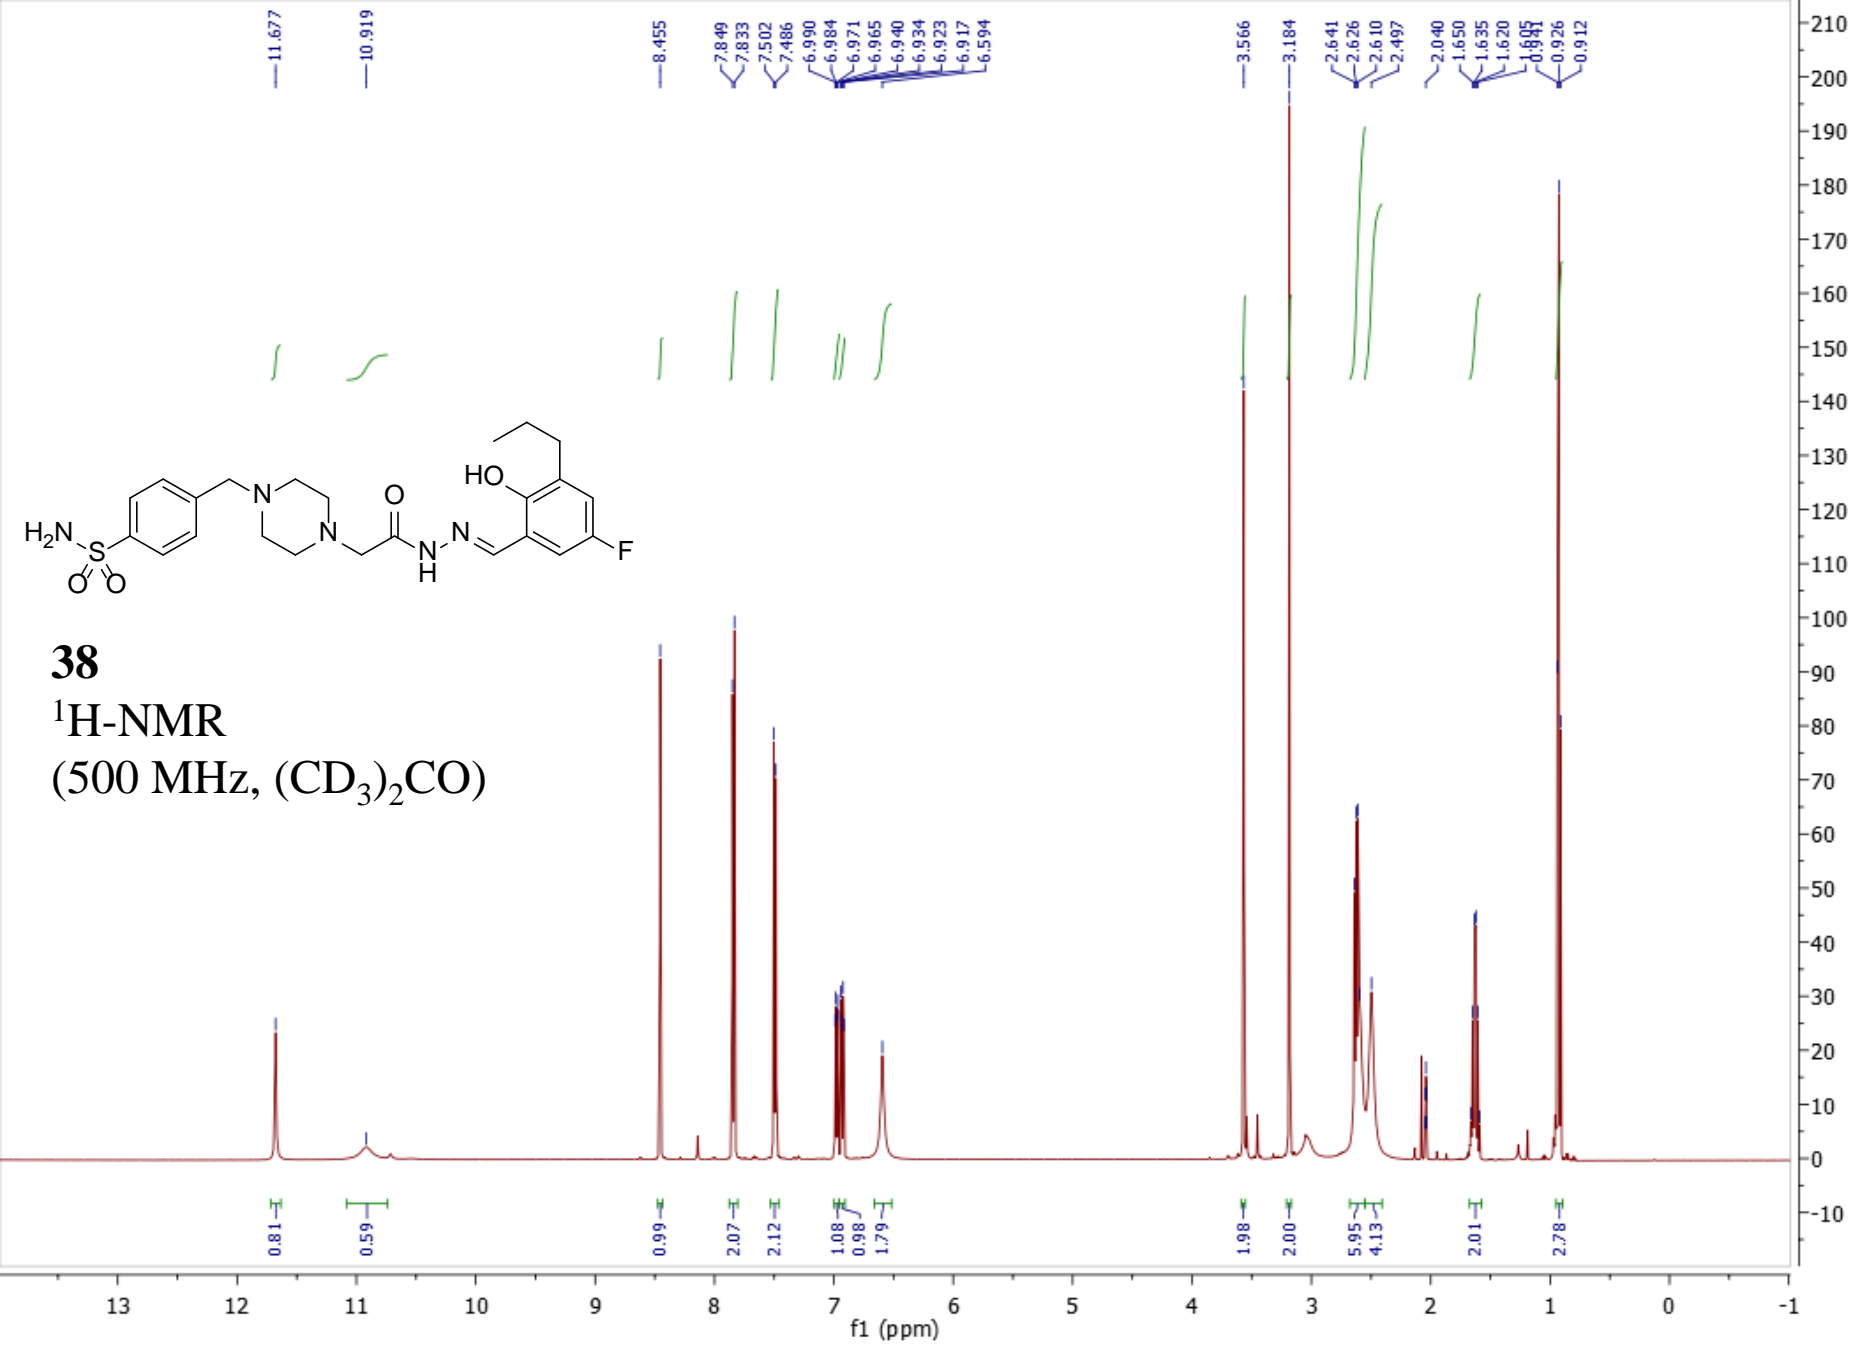



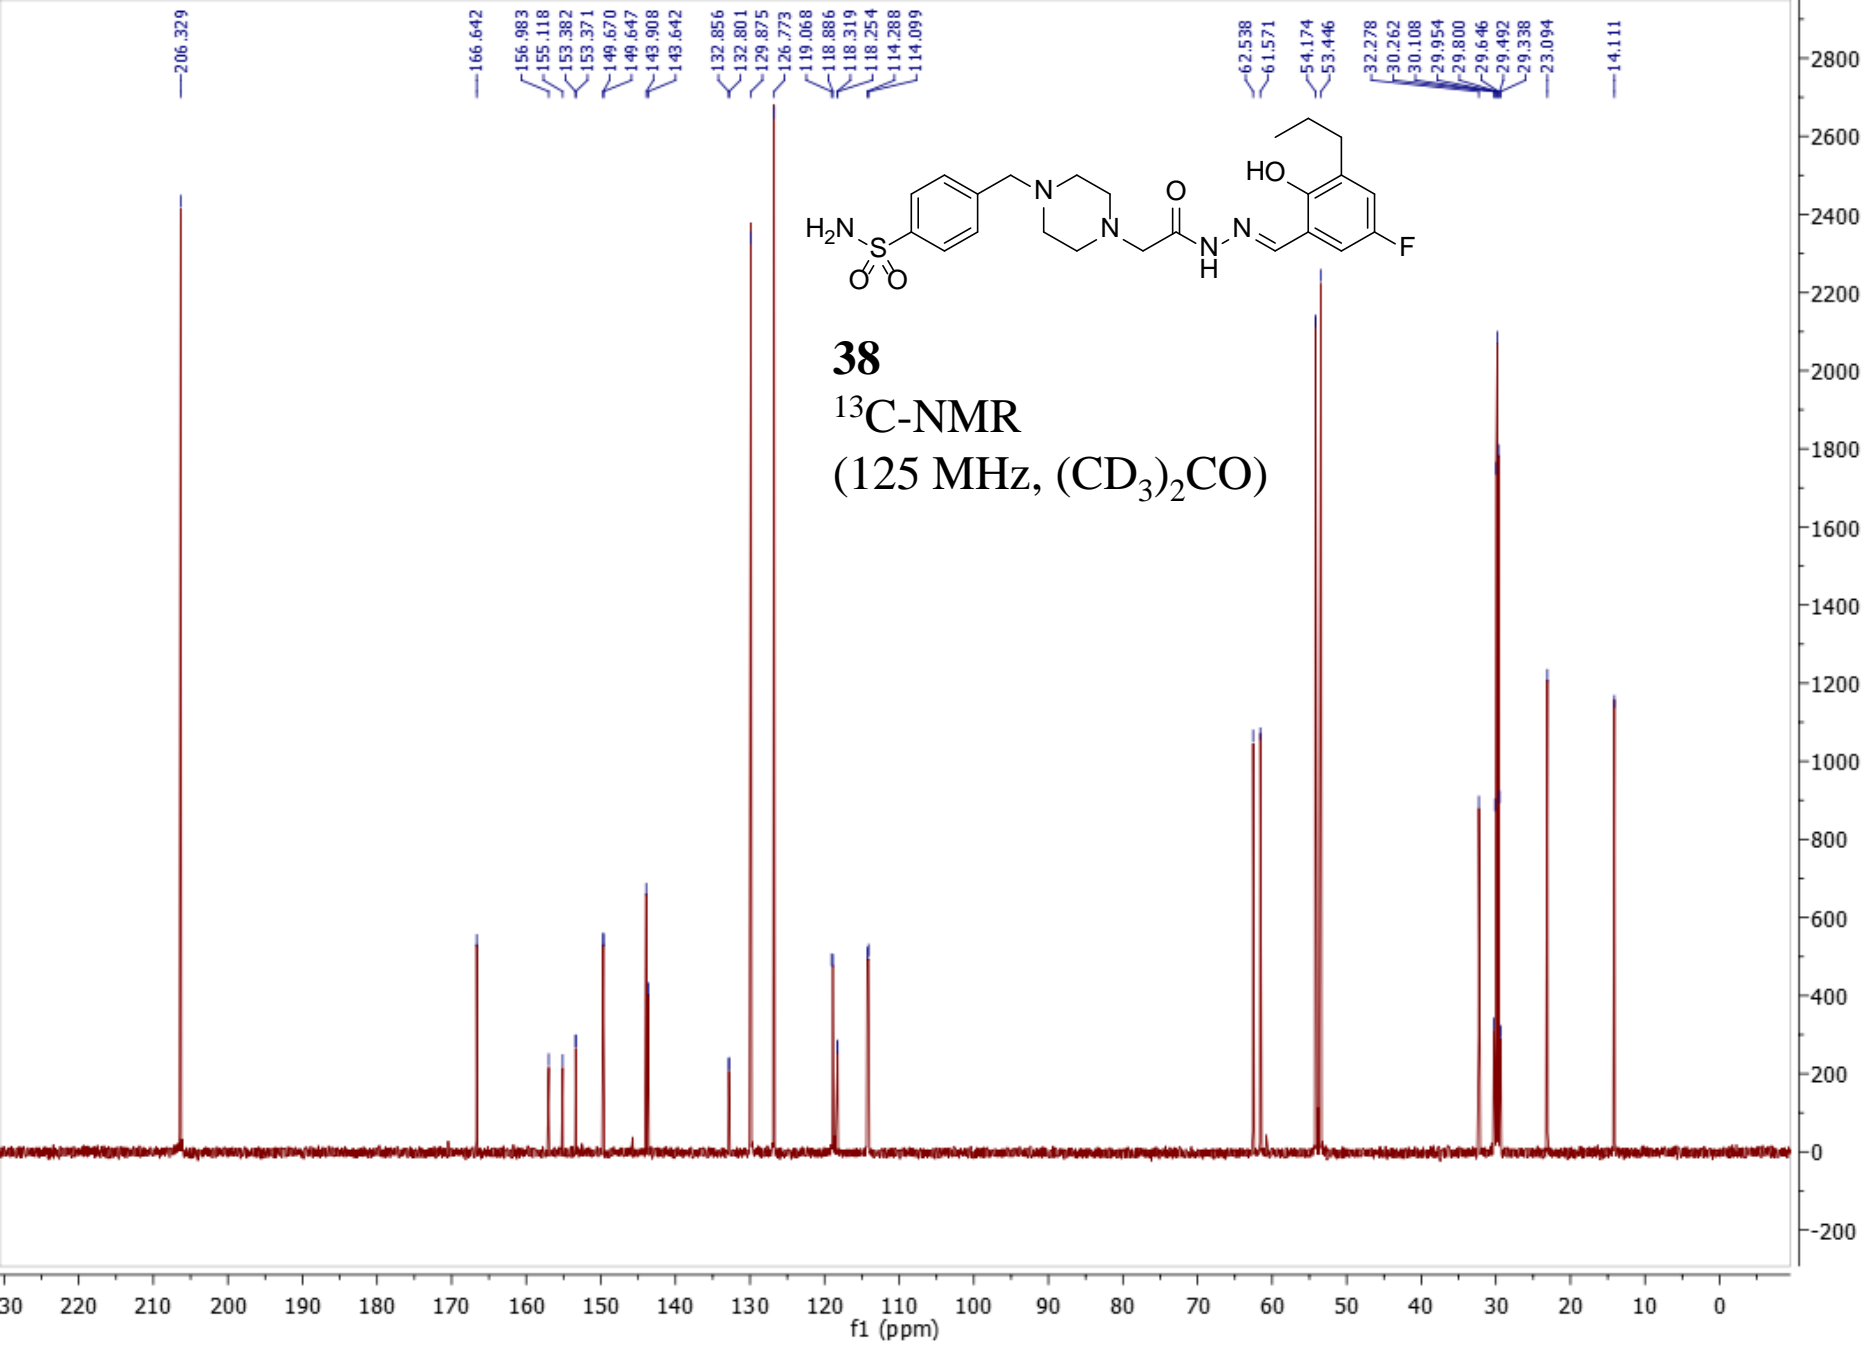

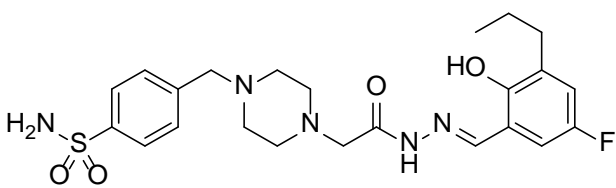

**38**  
<sup>19</sup>F-NMR  
(470 MHz, (CD<sub>3</sub>)<sub>2</sub>CO)

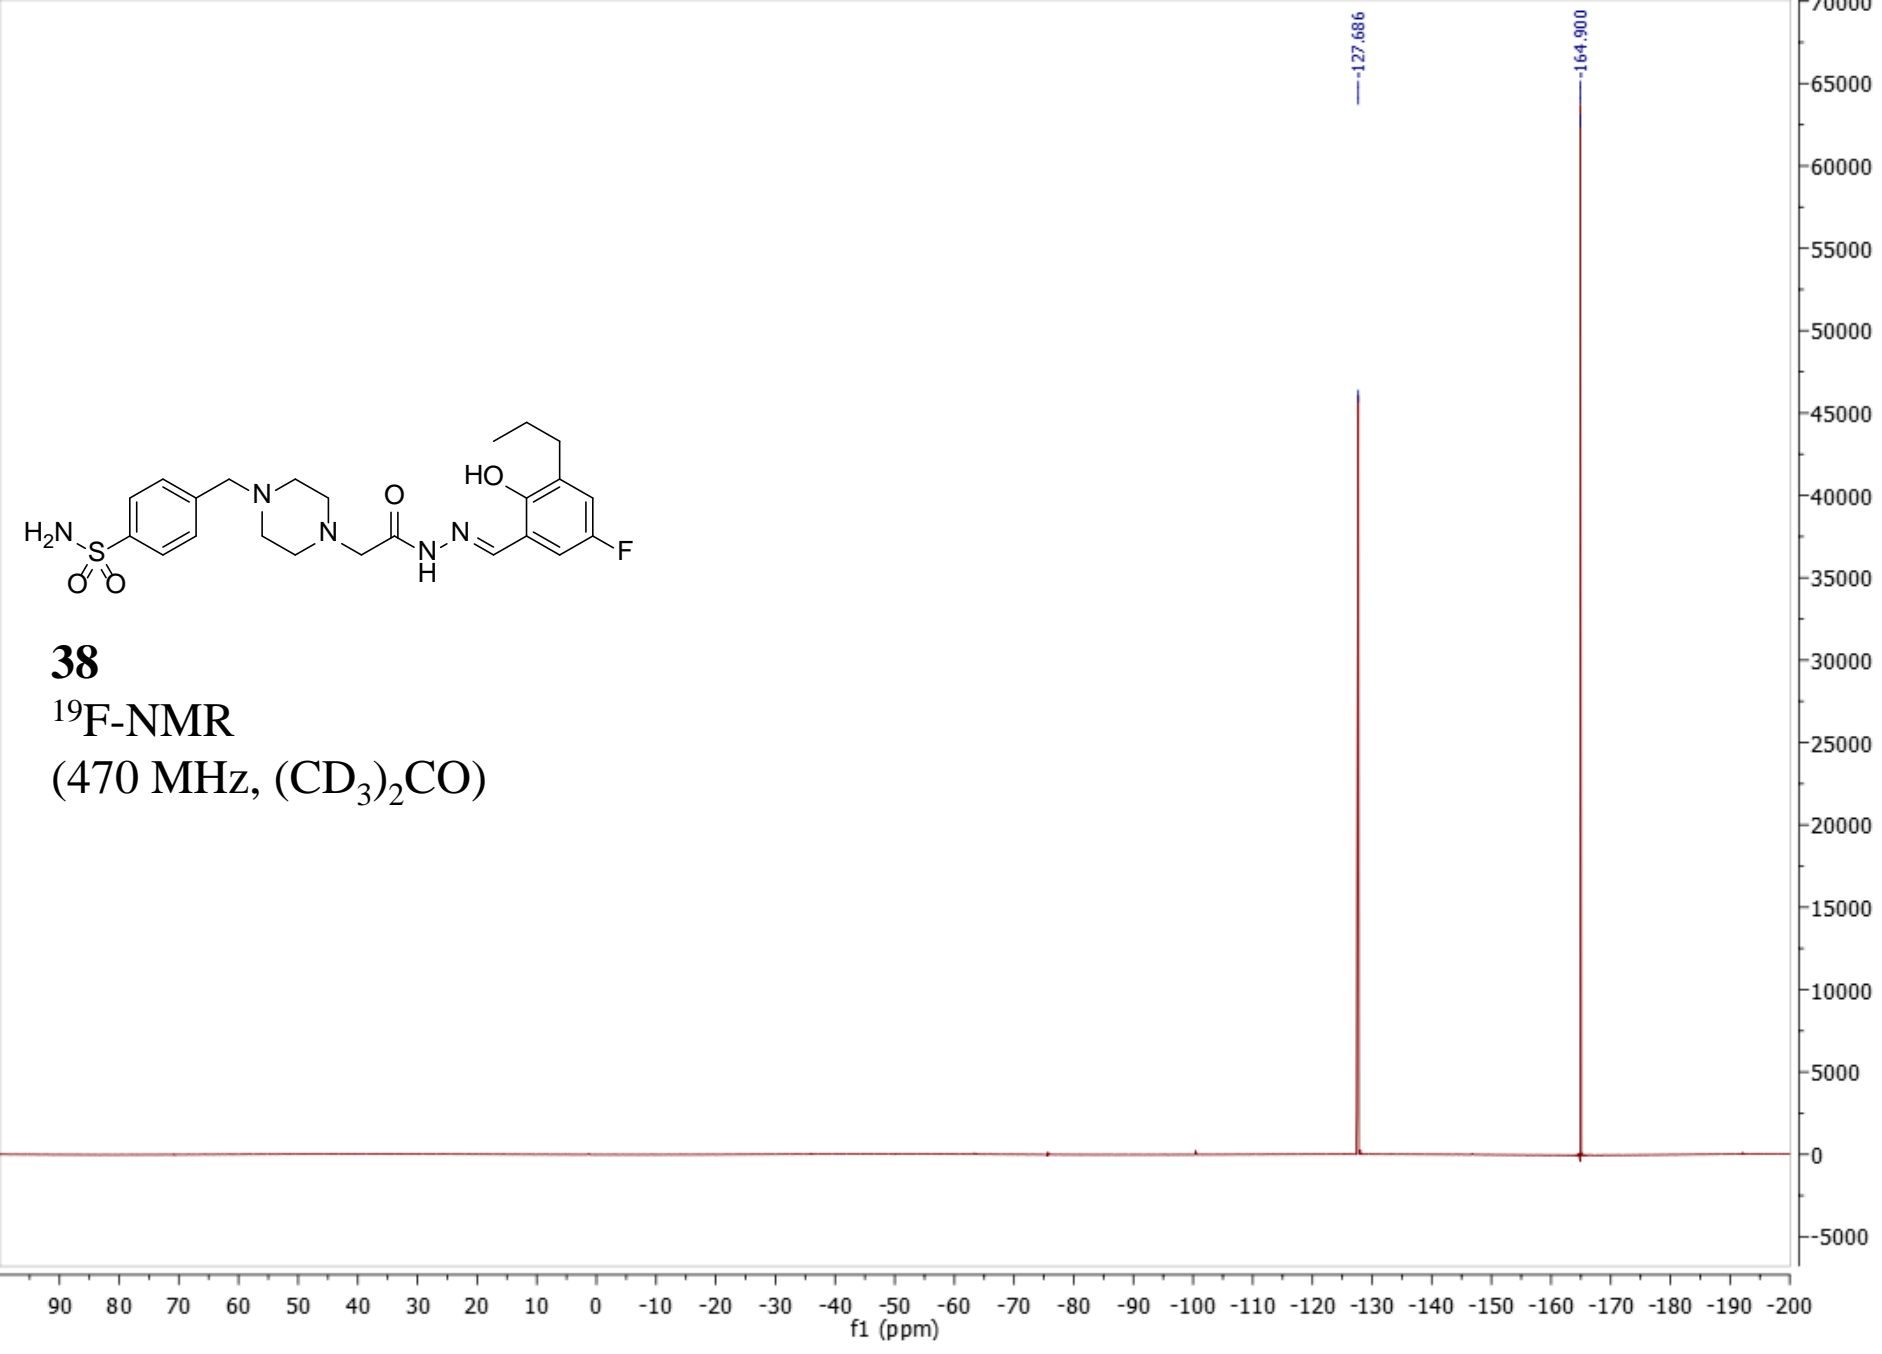

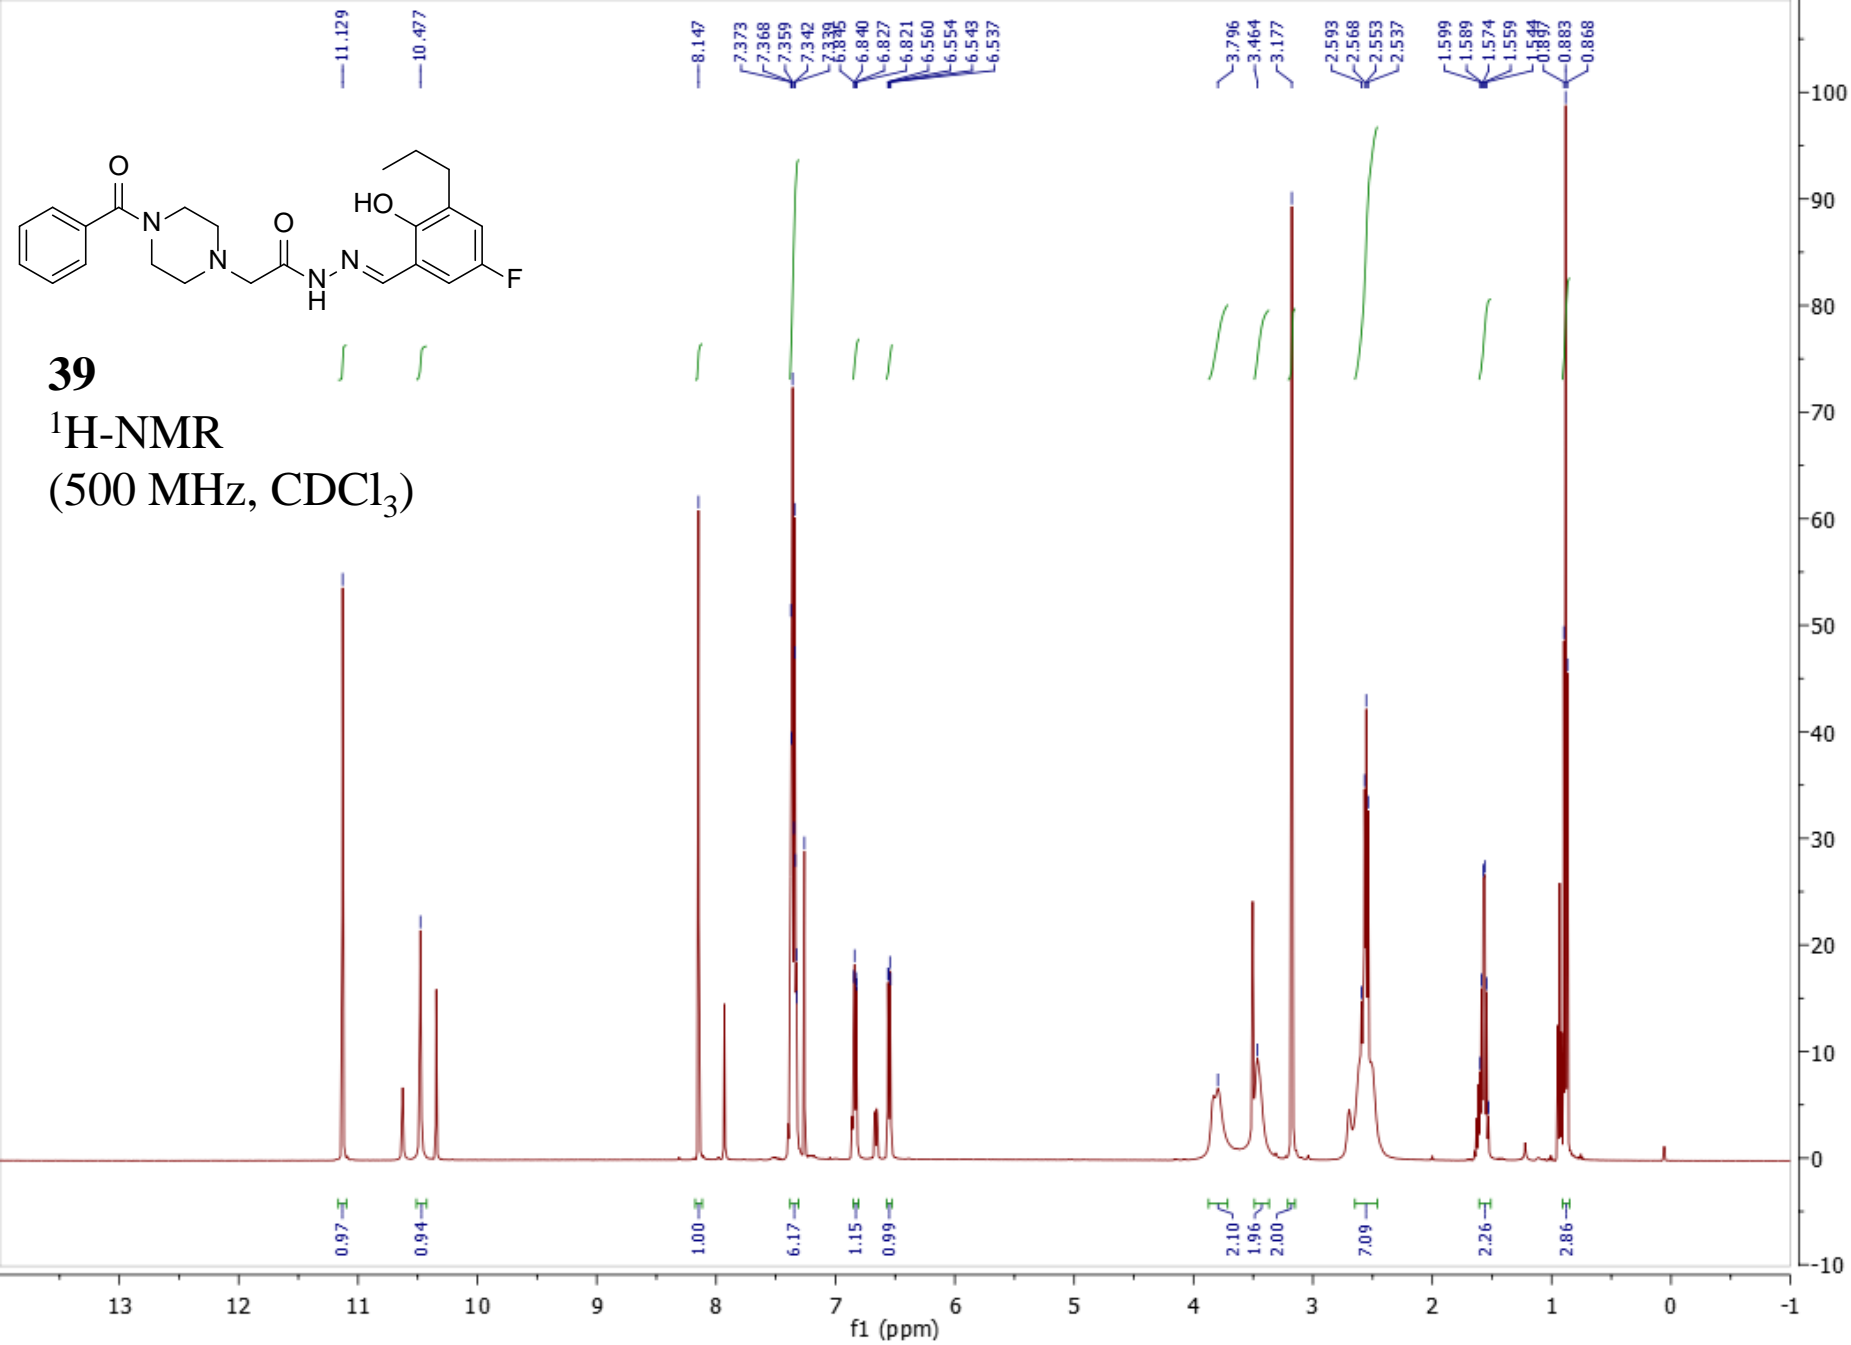

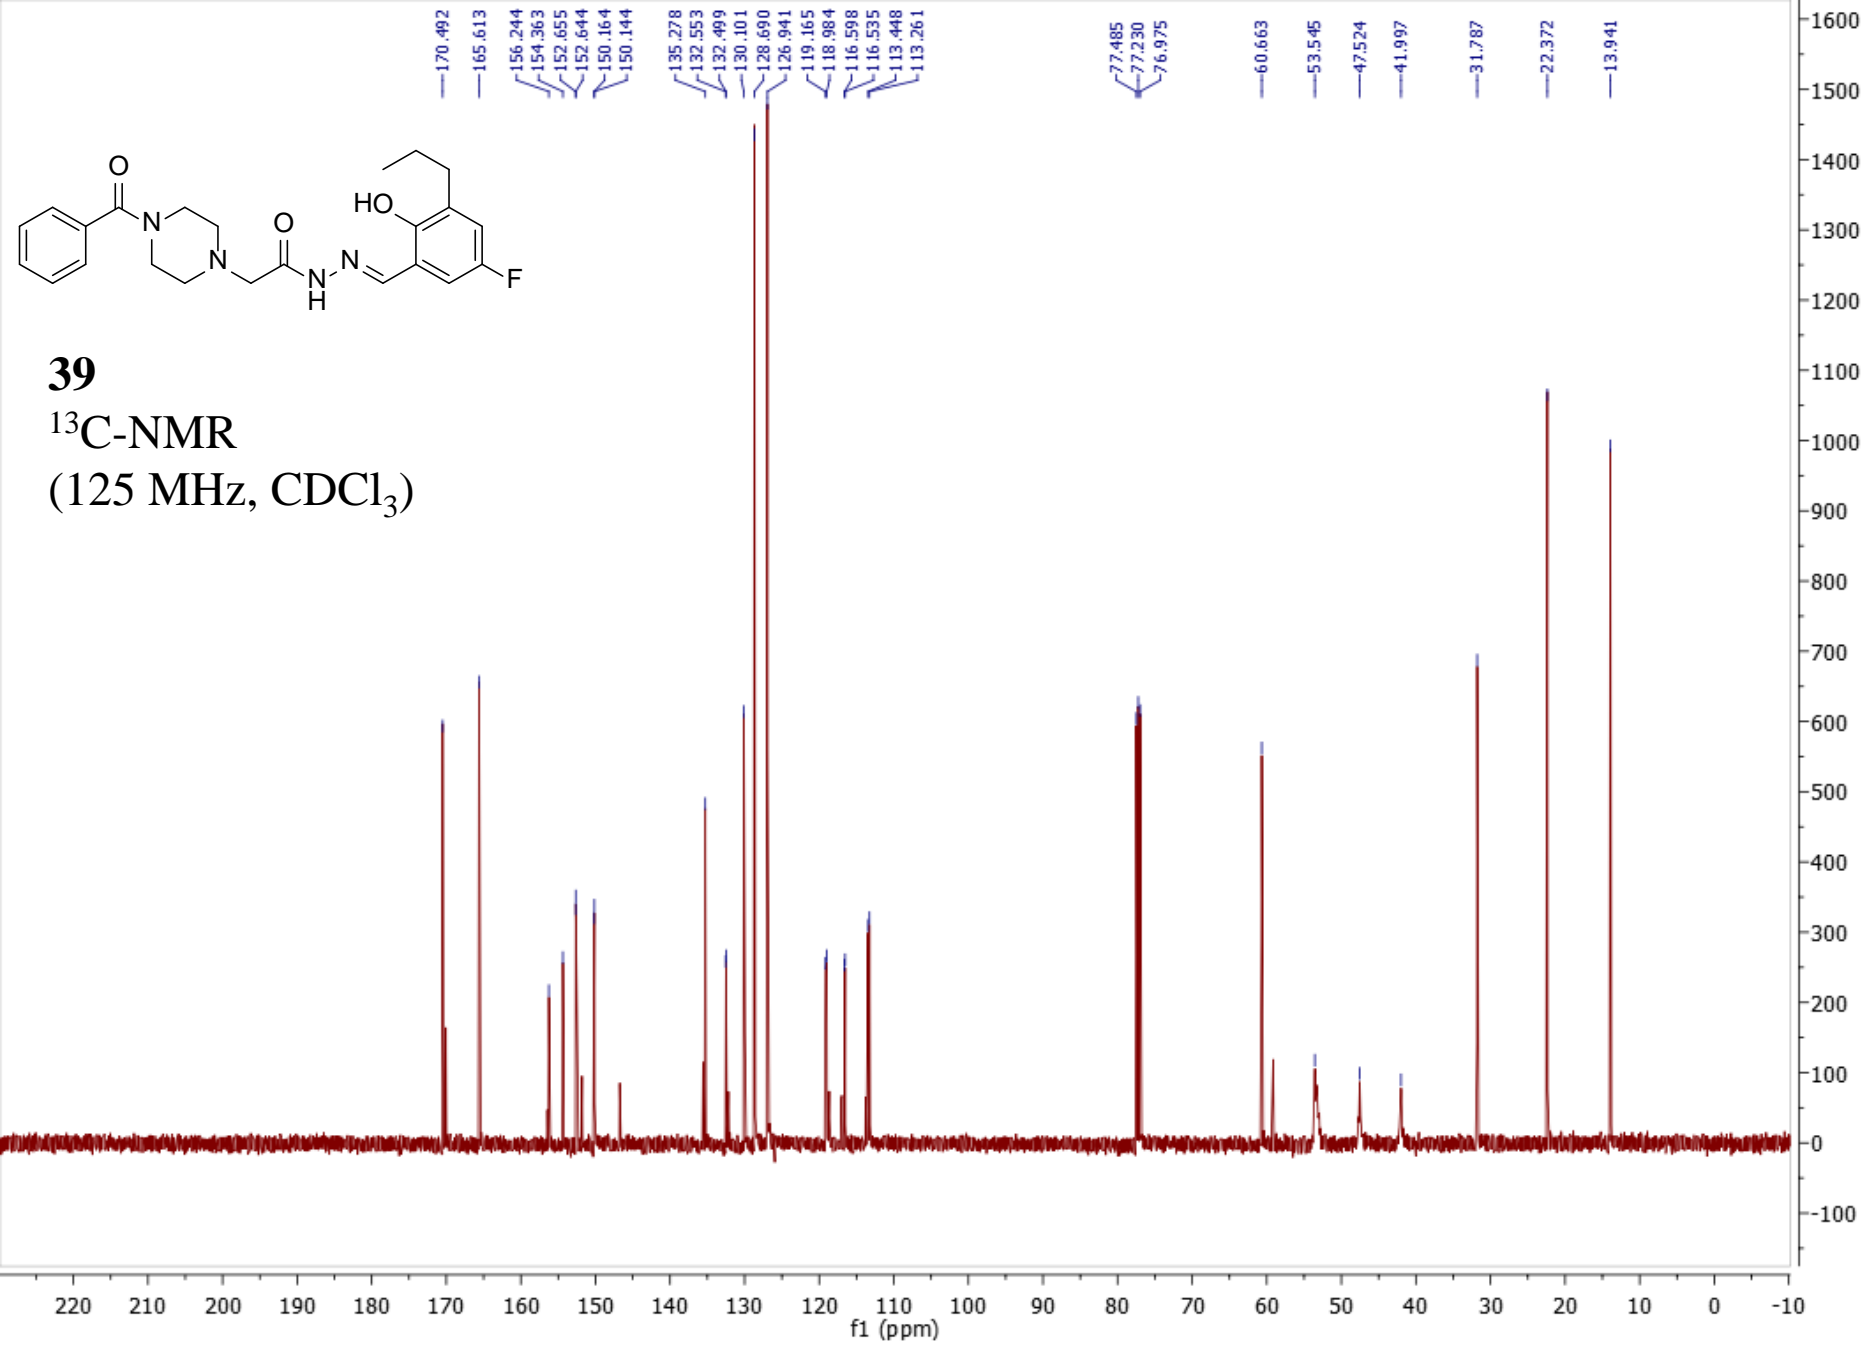

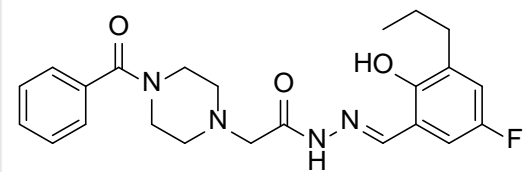

**39**

<sup>19</sup>F-NMR

(470 MHz, CDCl<sub>3</sub>)

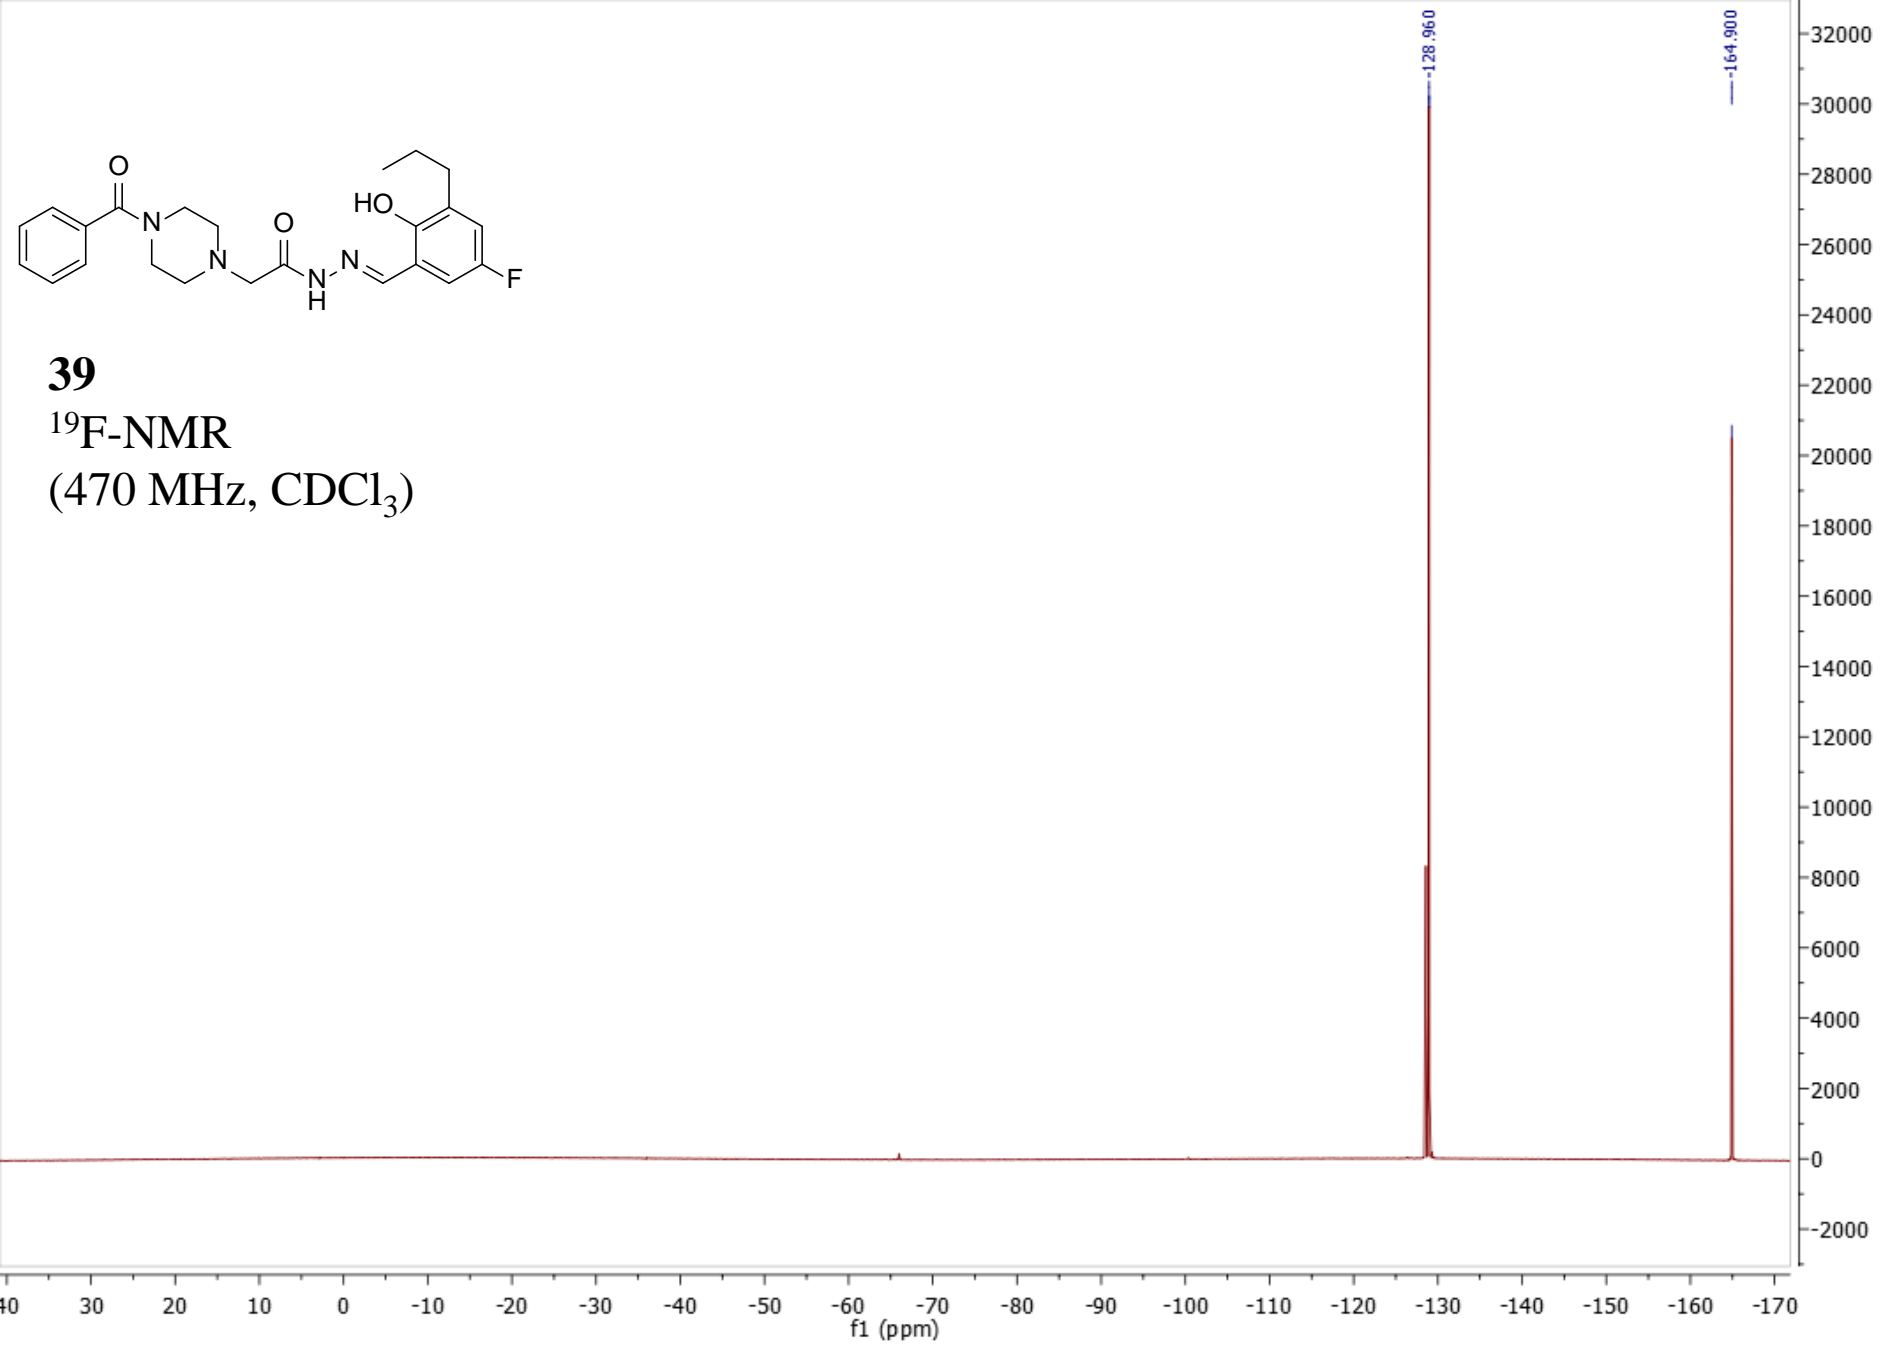

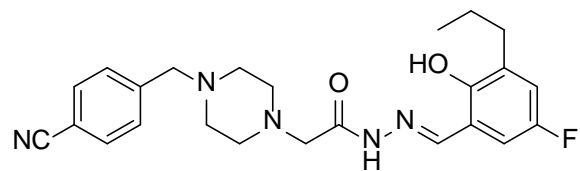

**40**  
 $^1\text{H-NMR}$   
 (500 MHz,  $\text{CDCl}_3$ )

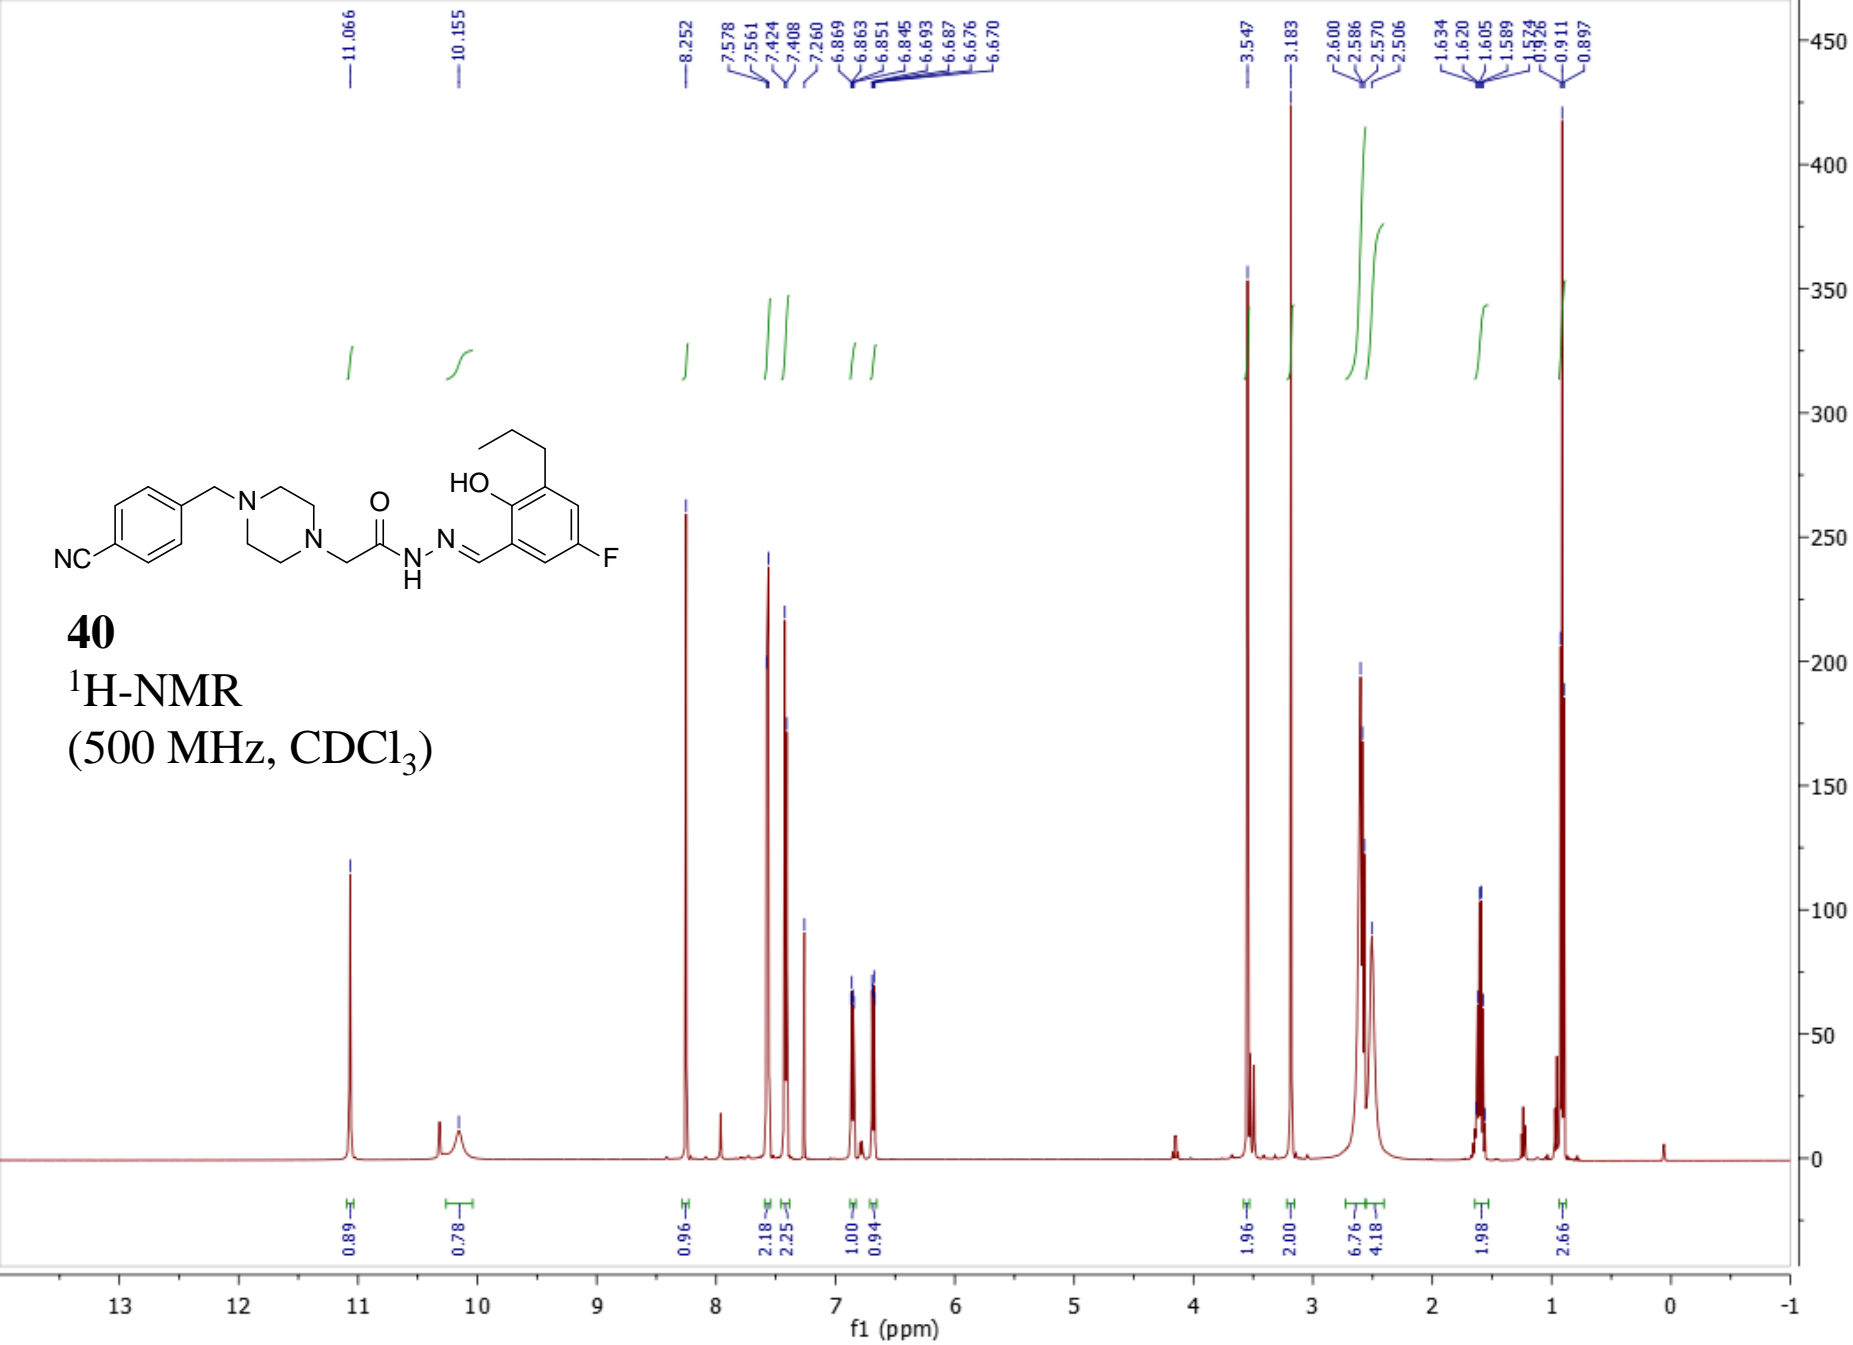



**40**

$^{13}\text{C}$ -NMR

(125 MHz,  $\text{CDCl}_3$ )

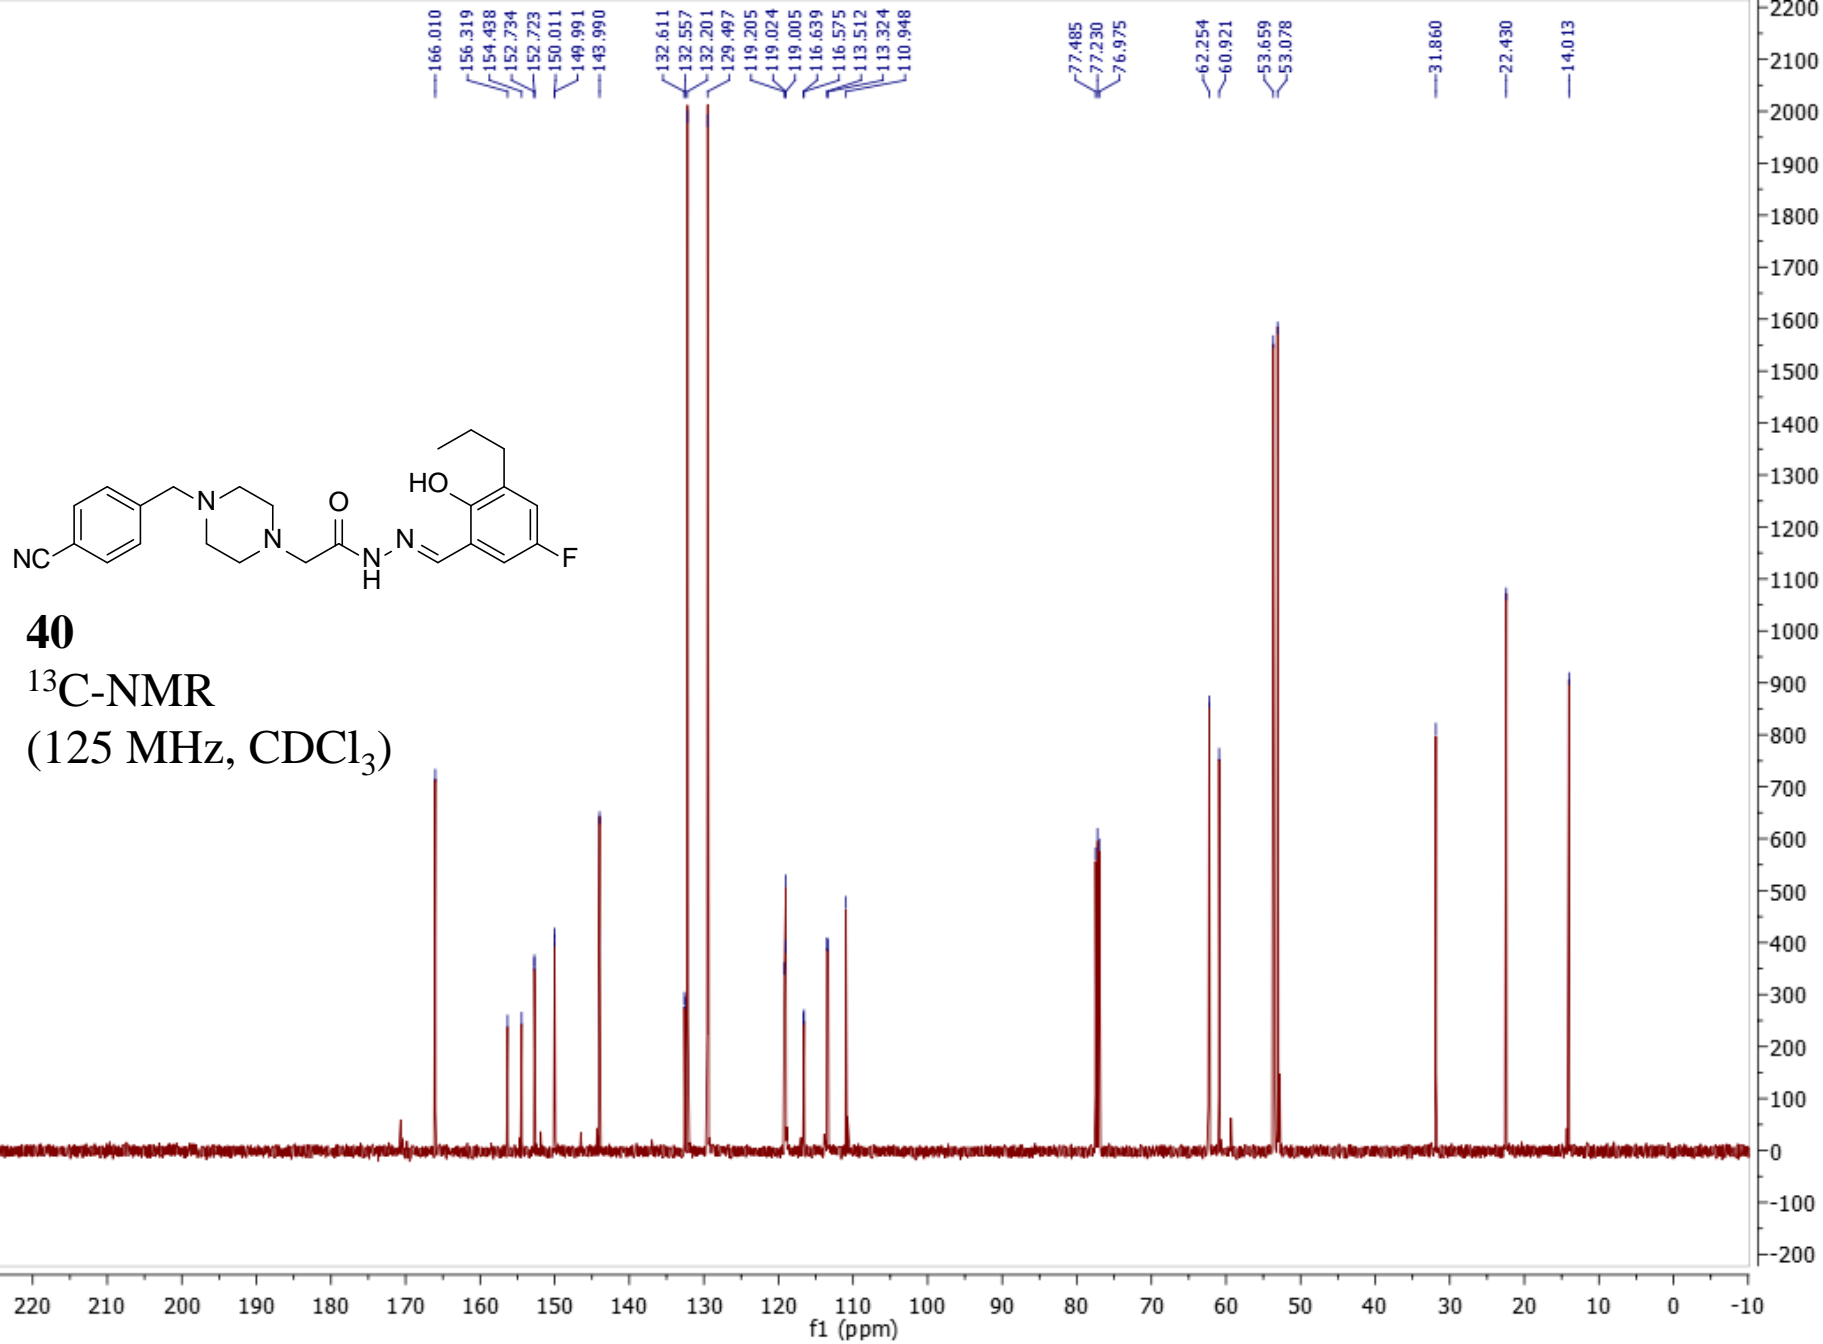



**40**

<sup>19</sup>F-NMR

(470 MHz, CDCl<sub>3</sub>)

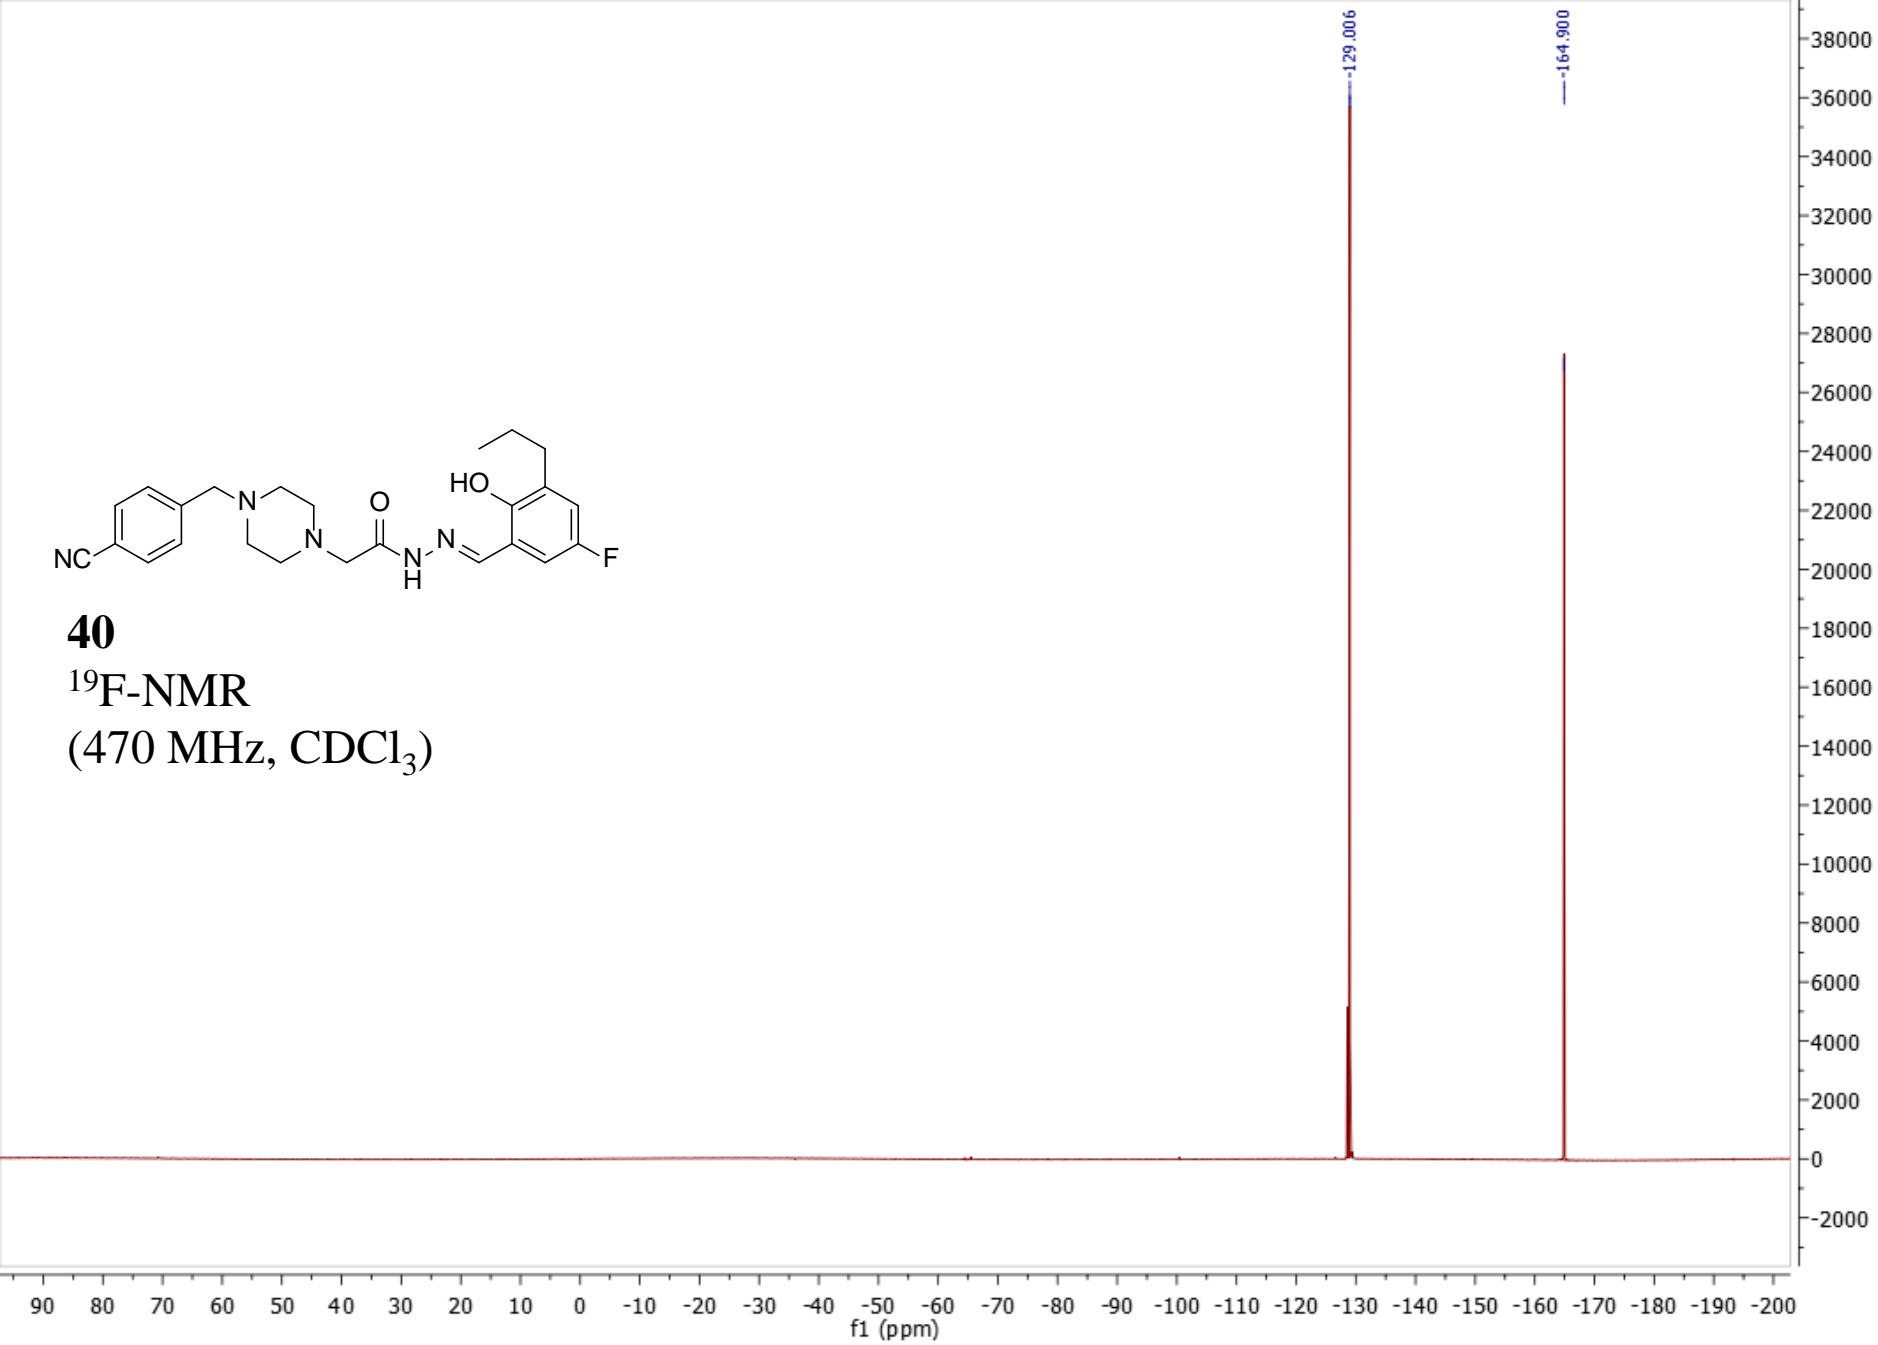



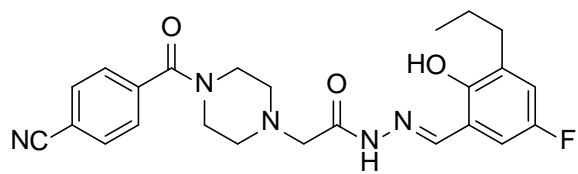

**41**  
<sup>1</sup>H-NMR  
 (500 MHz, CDCl<sub>3</sub>)

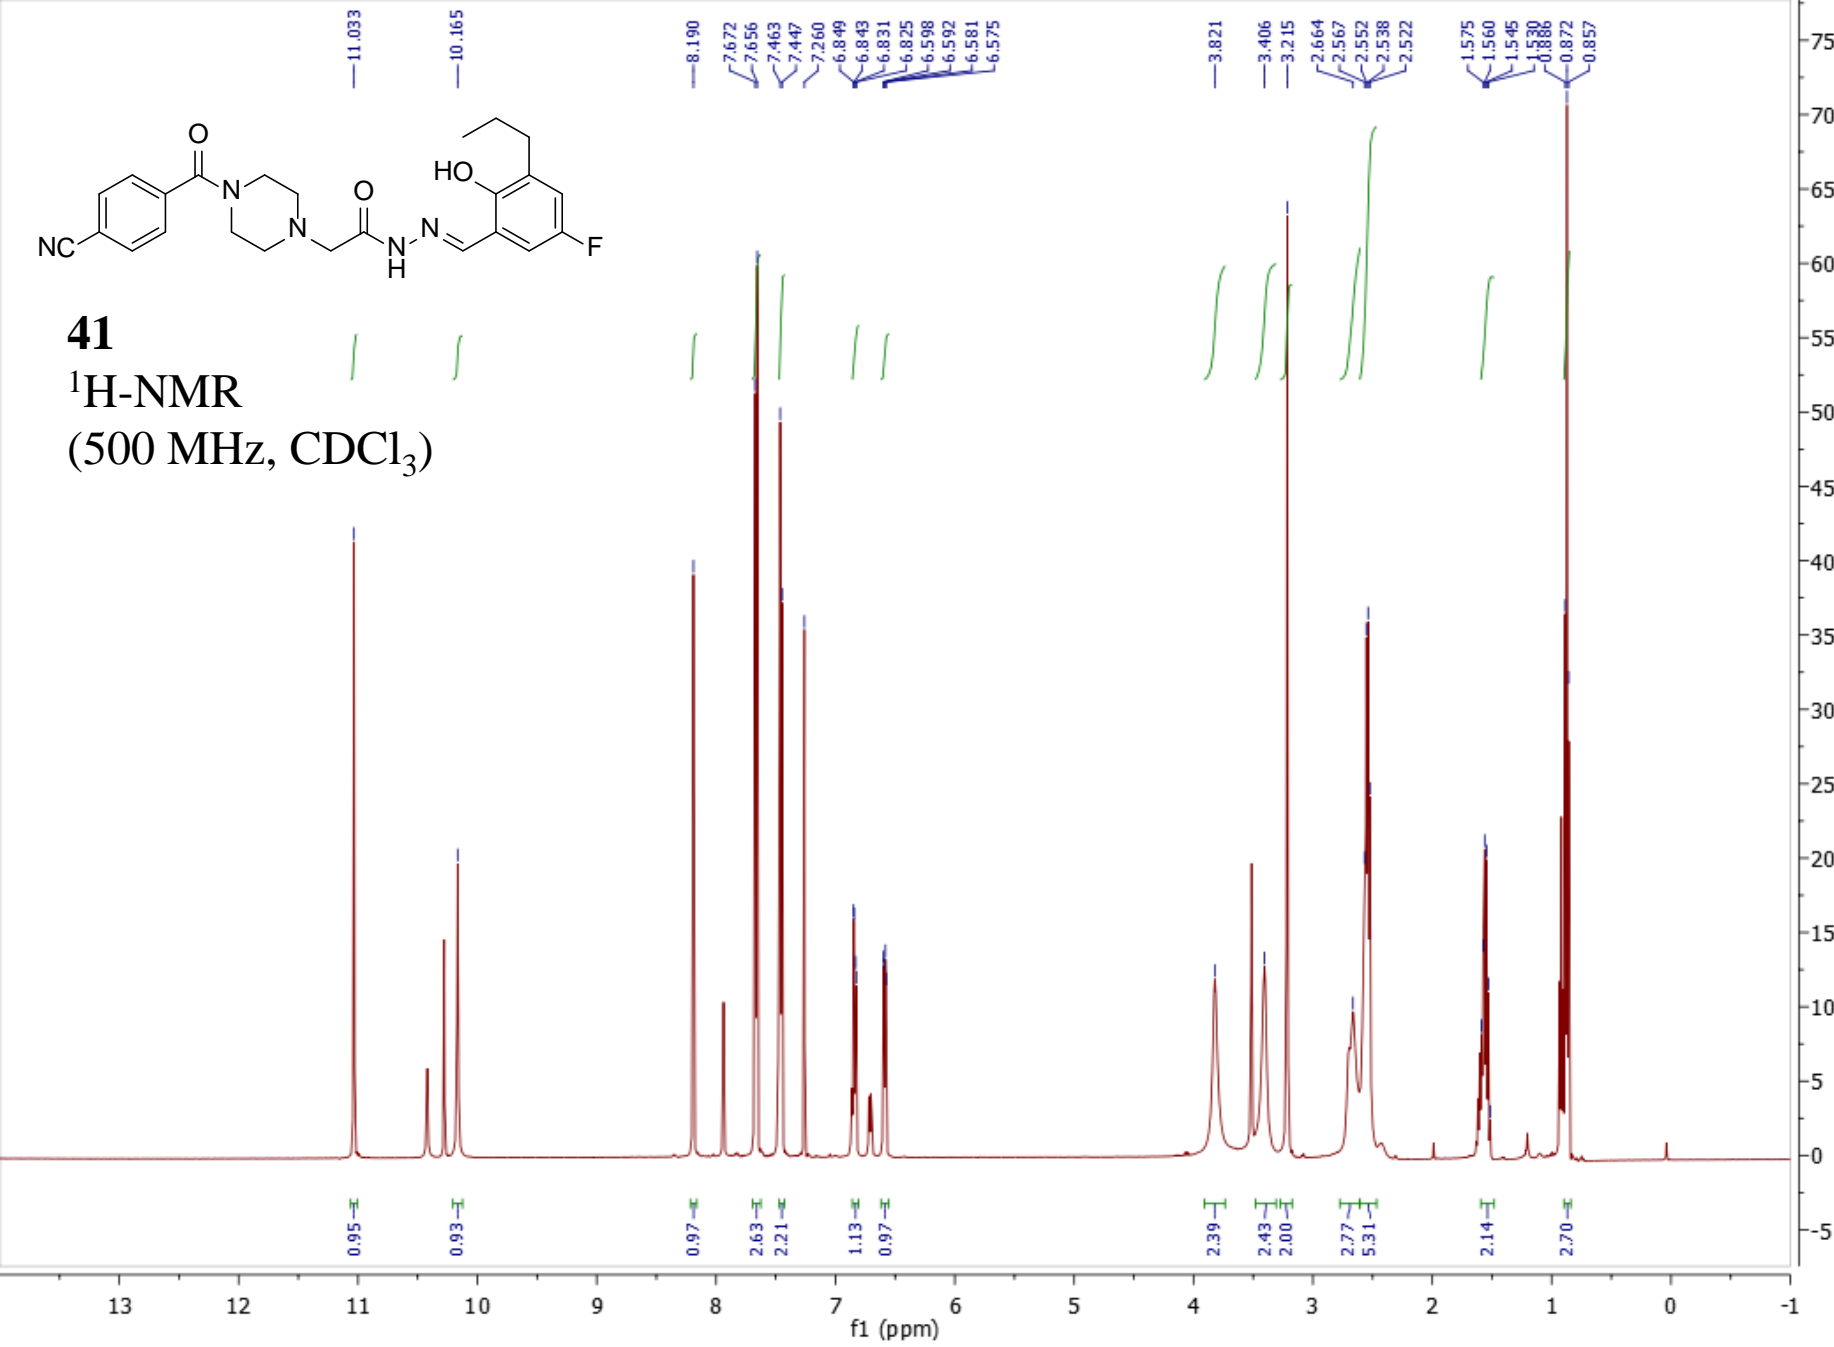

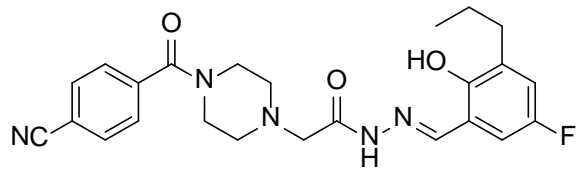

**41**  
<sup>13</sup>C-NMR  
(125 MHz, CDCl<sub>3</sub>)

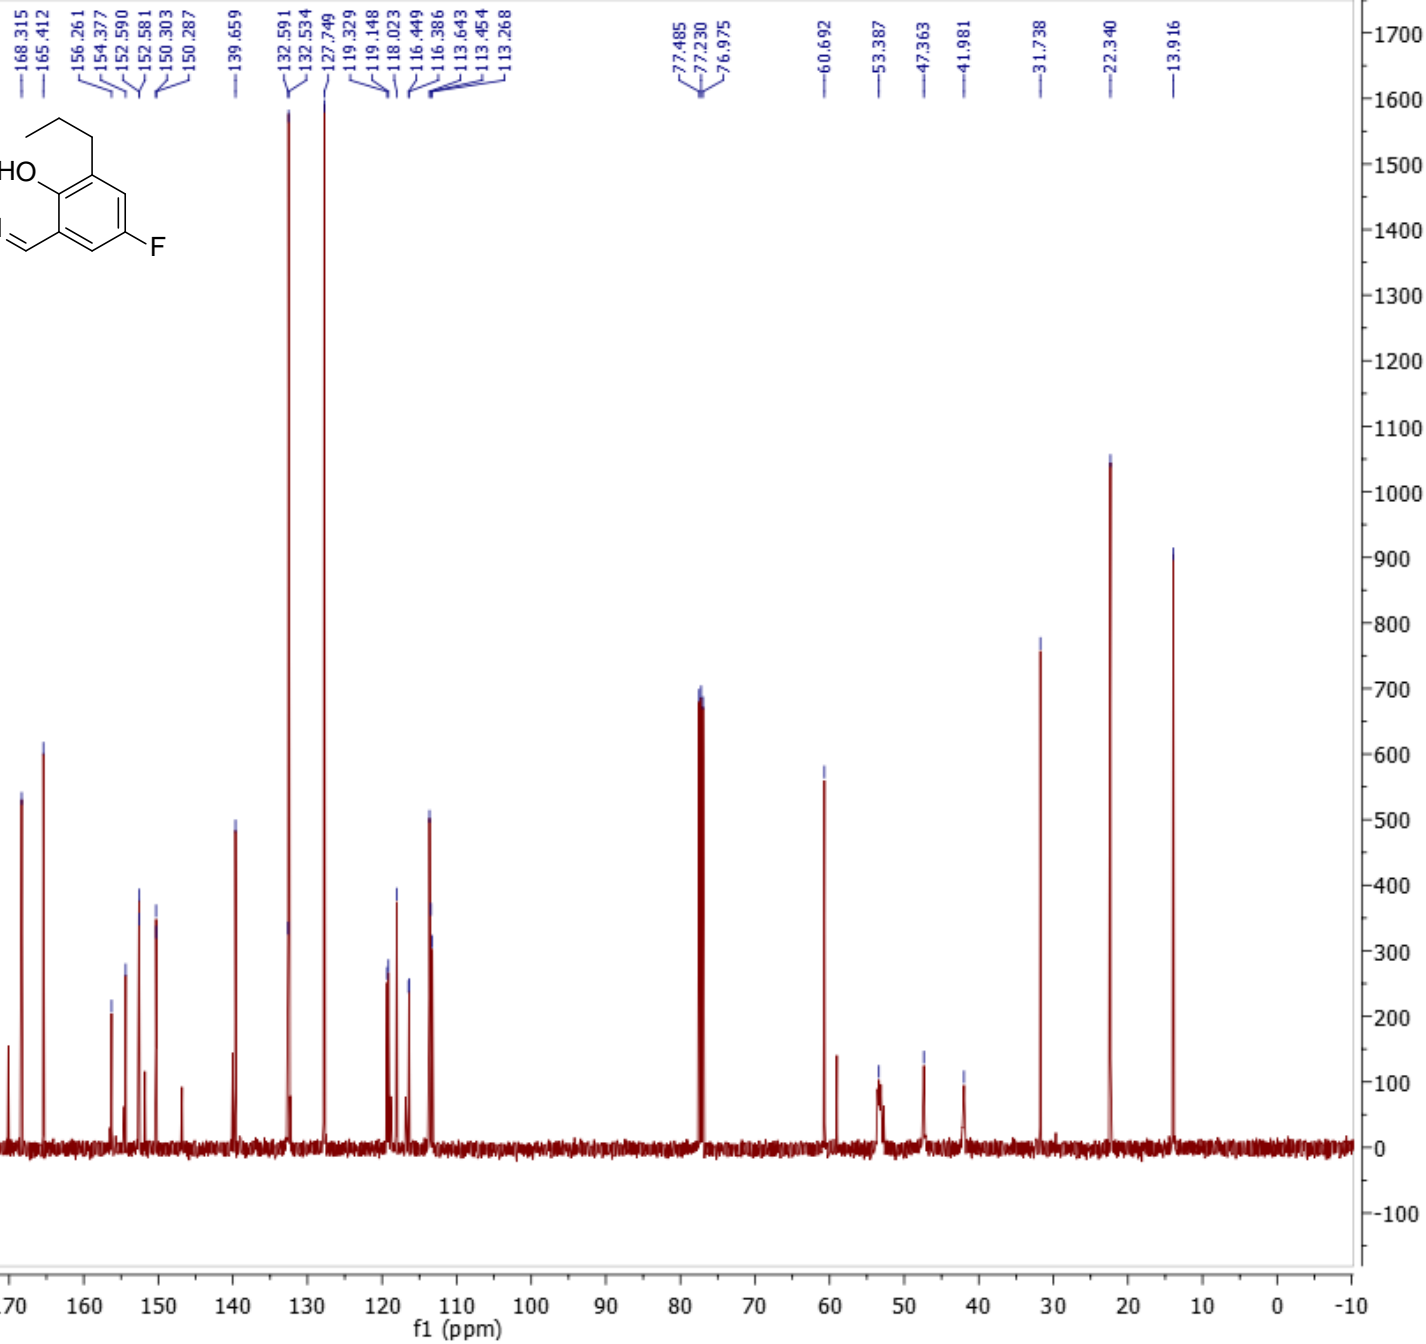



**41**

<sup>19</sup>F-NMR

(470 MHz, CDCl<sub>3</sub>)

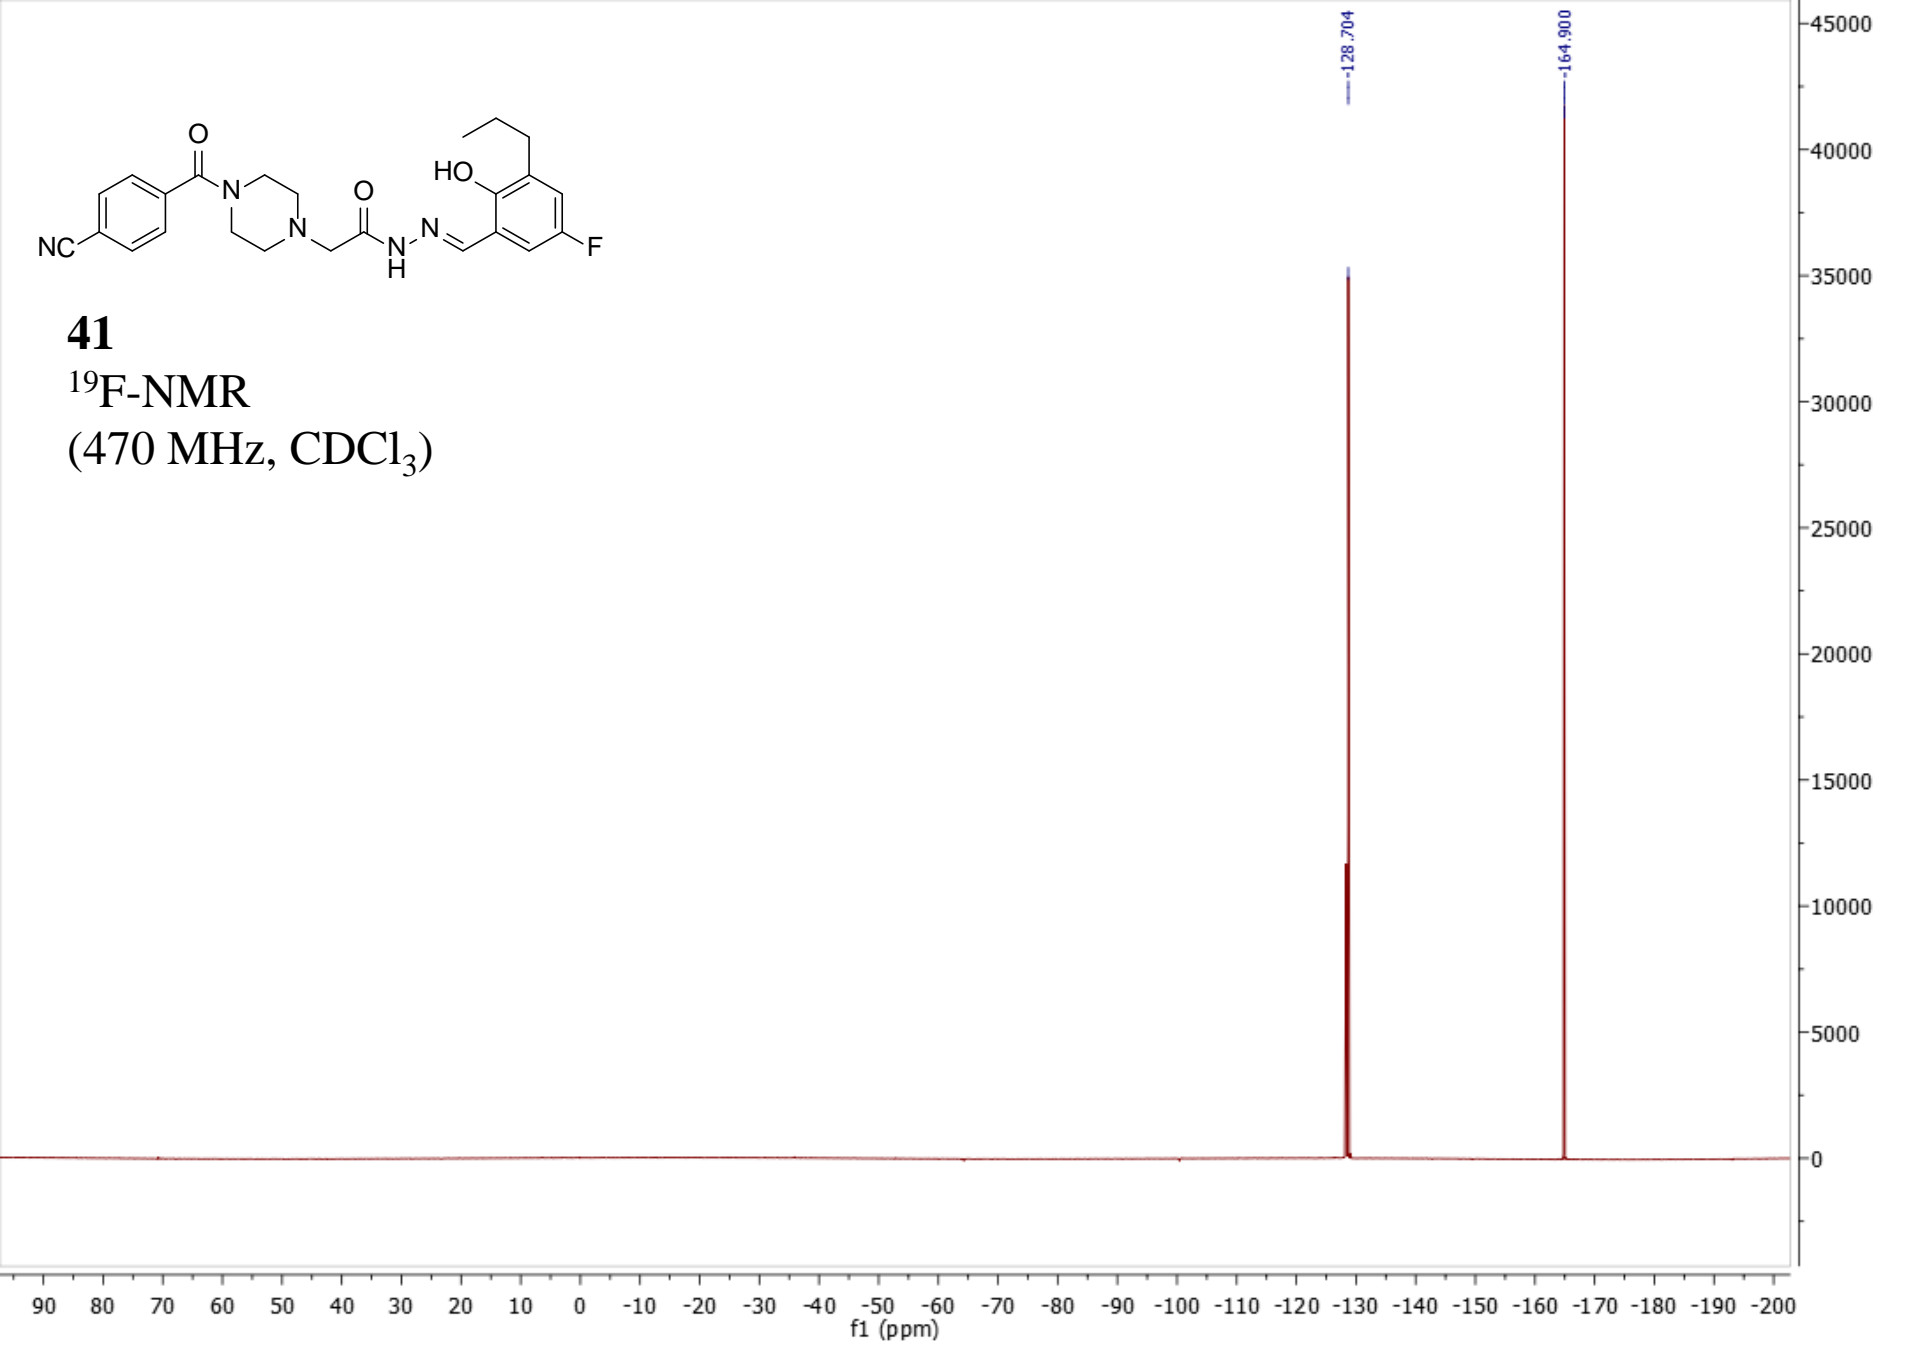

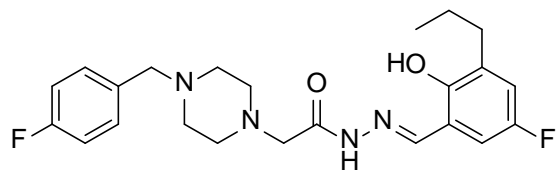

**42**

<sup>1</sup>H-NMR  
(500 MHz, CDCl<sub>3</sub>)

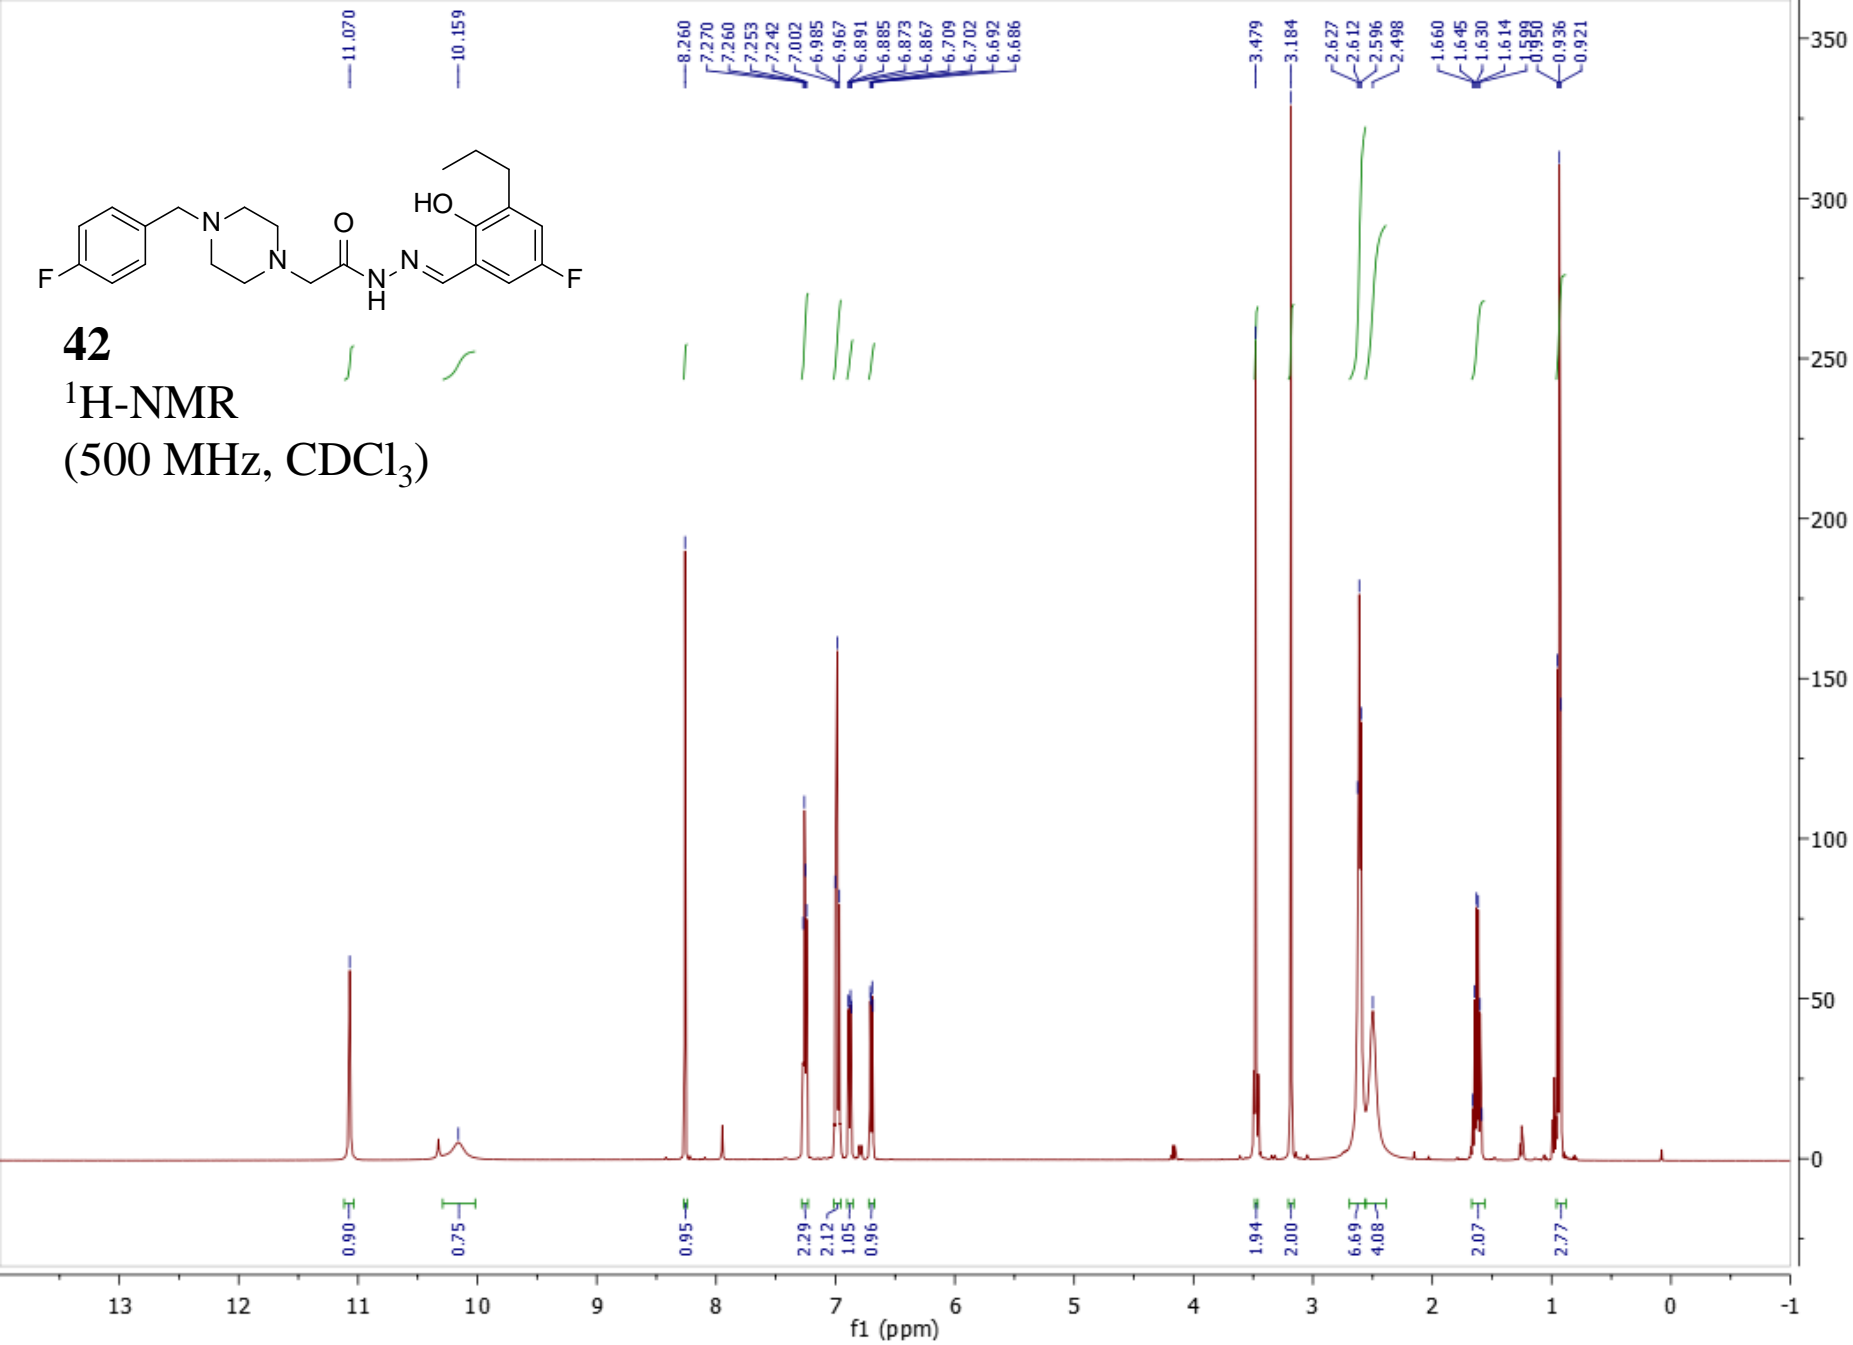

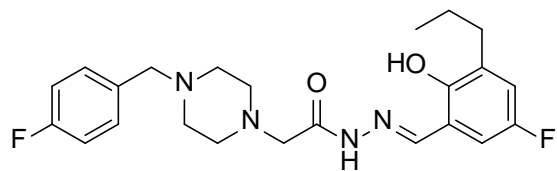

**42**

<sup>13</sup>C-NMR

(125 MHz, CDCl<sub>3</sub>)

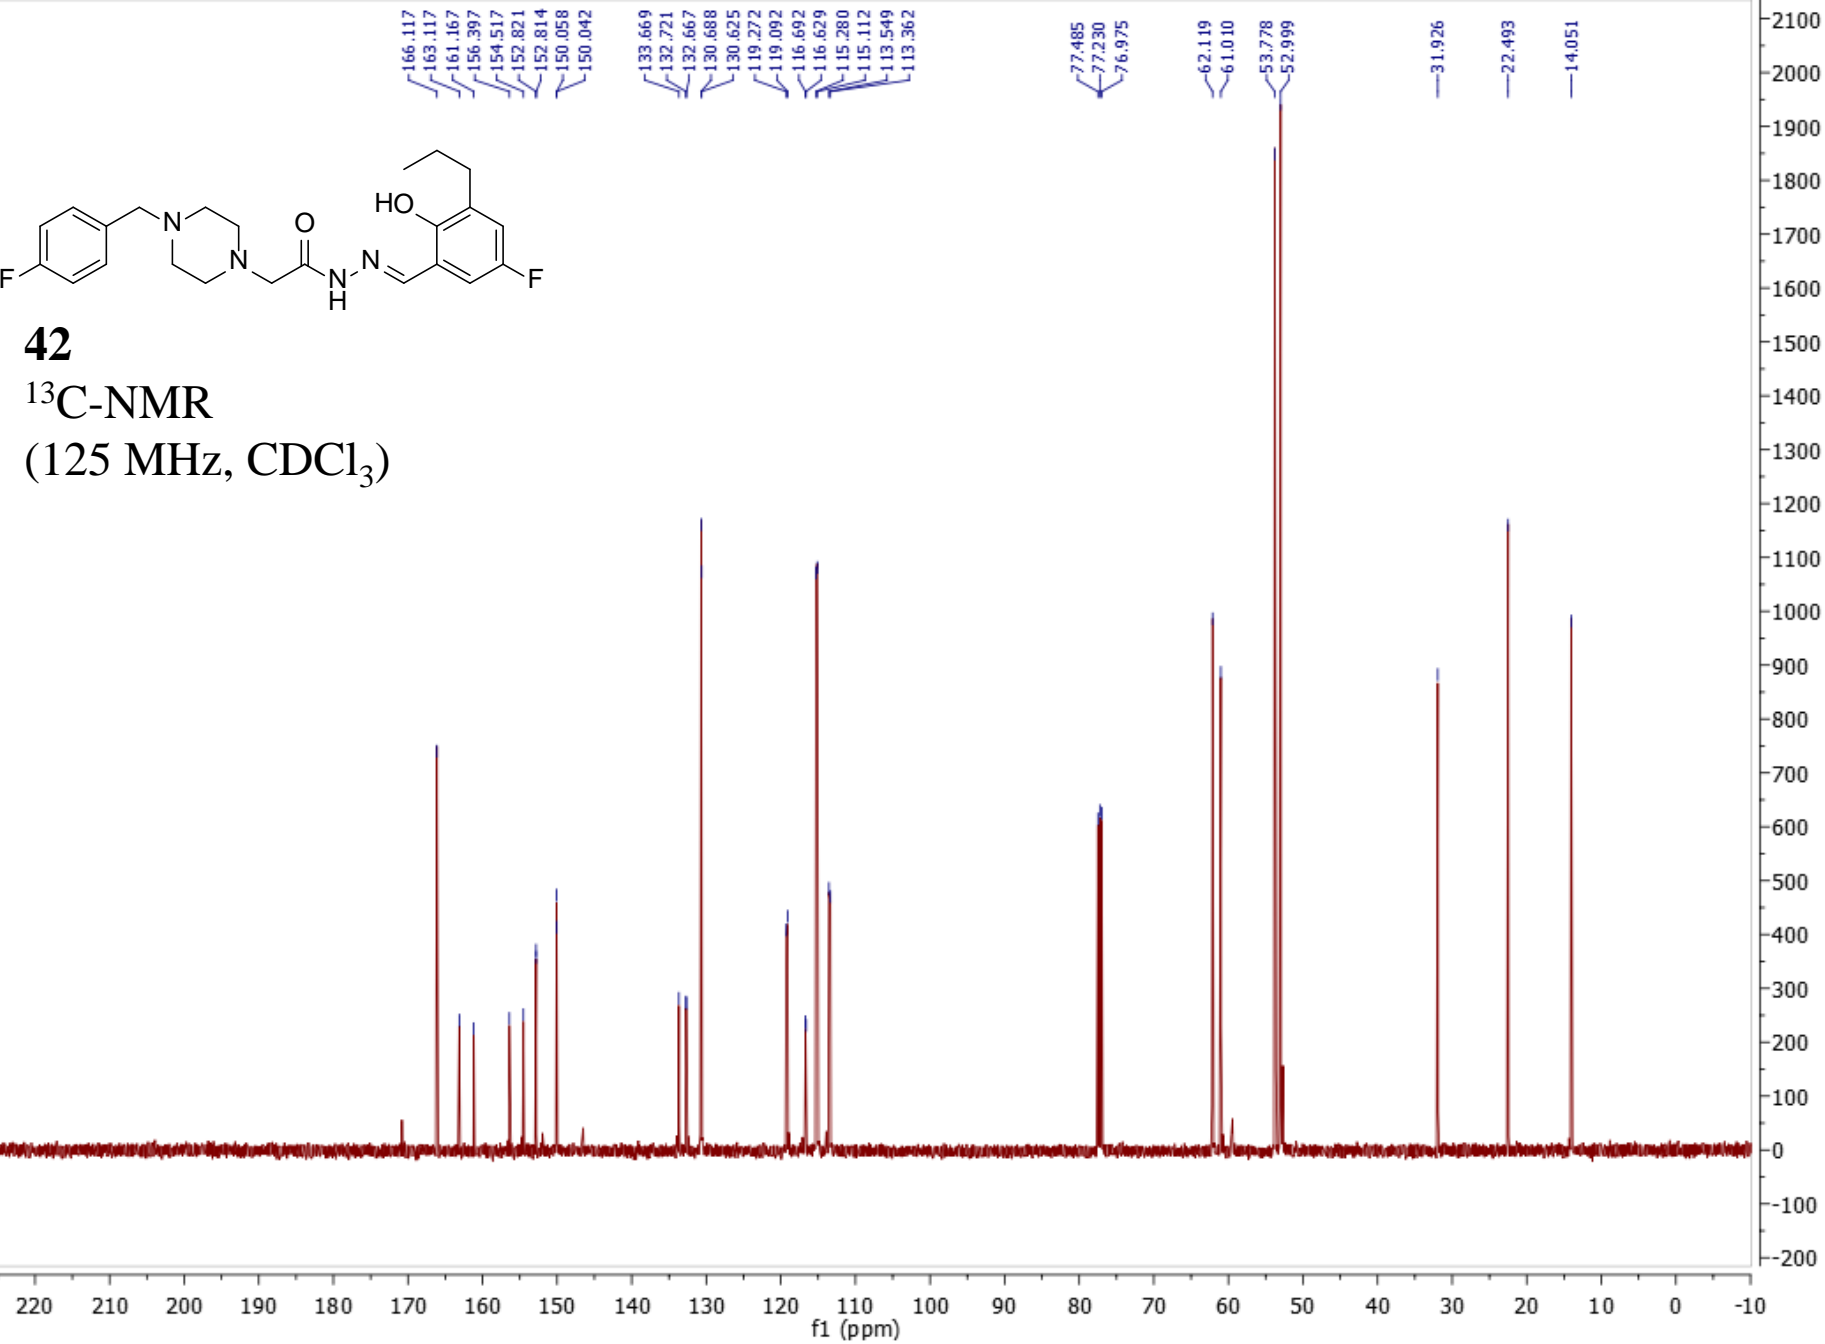

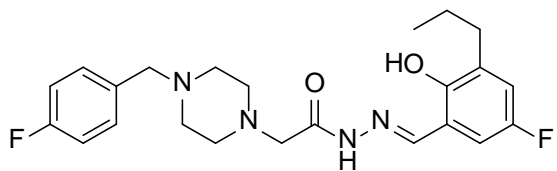

**42**

<sup>19</sup>F-NMR

(125 MHz, CDCl<sub>3</sub>)

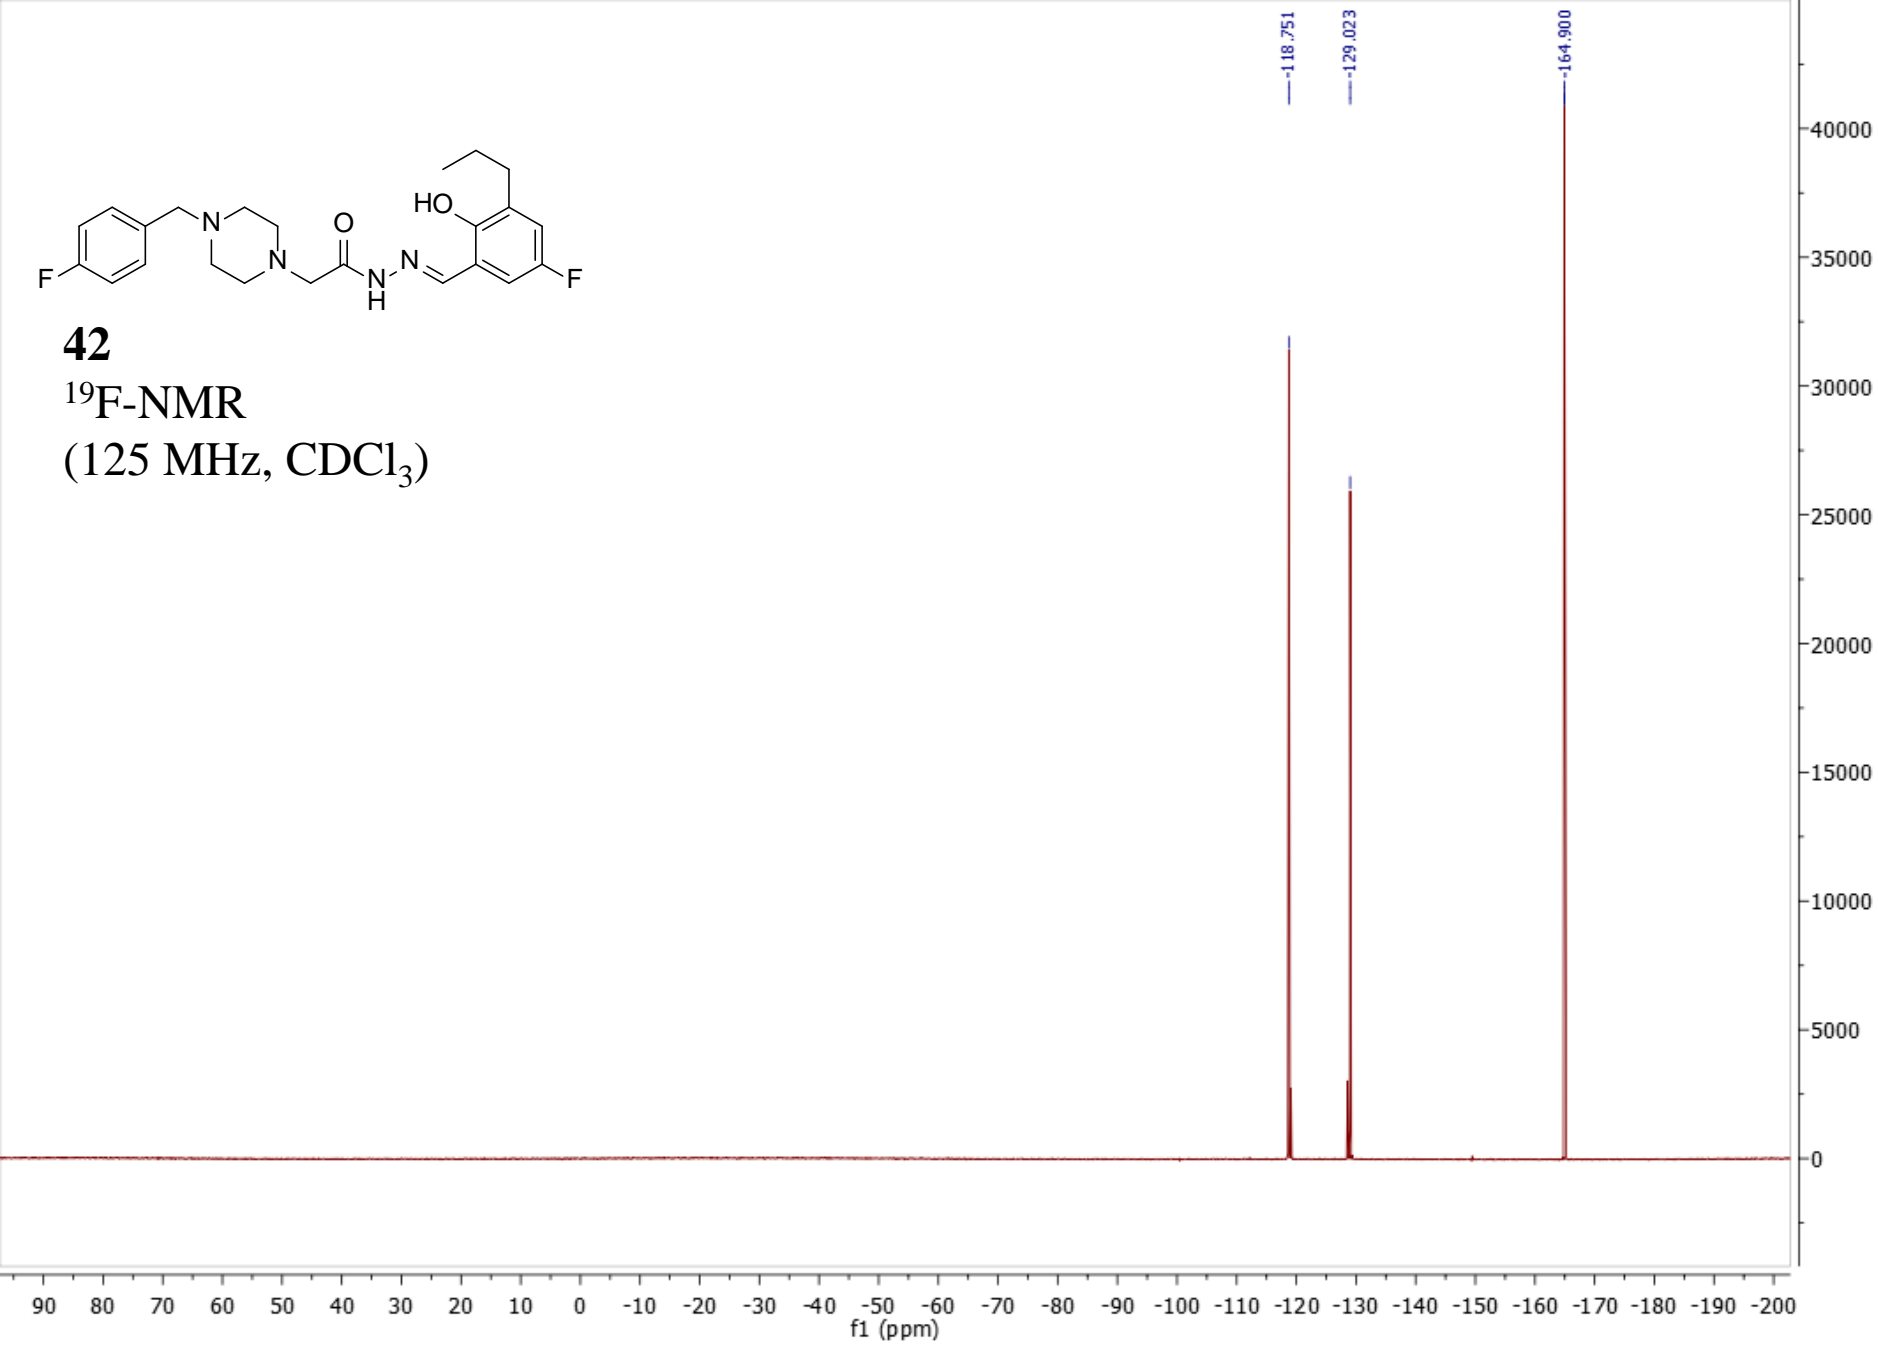

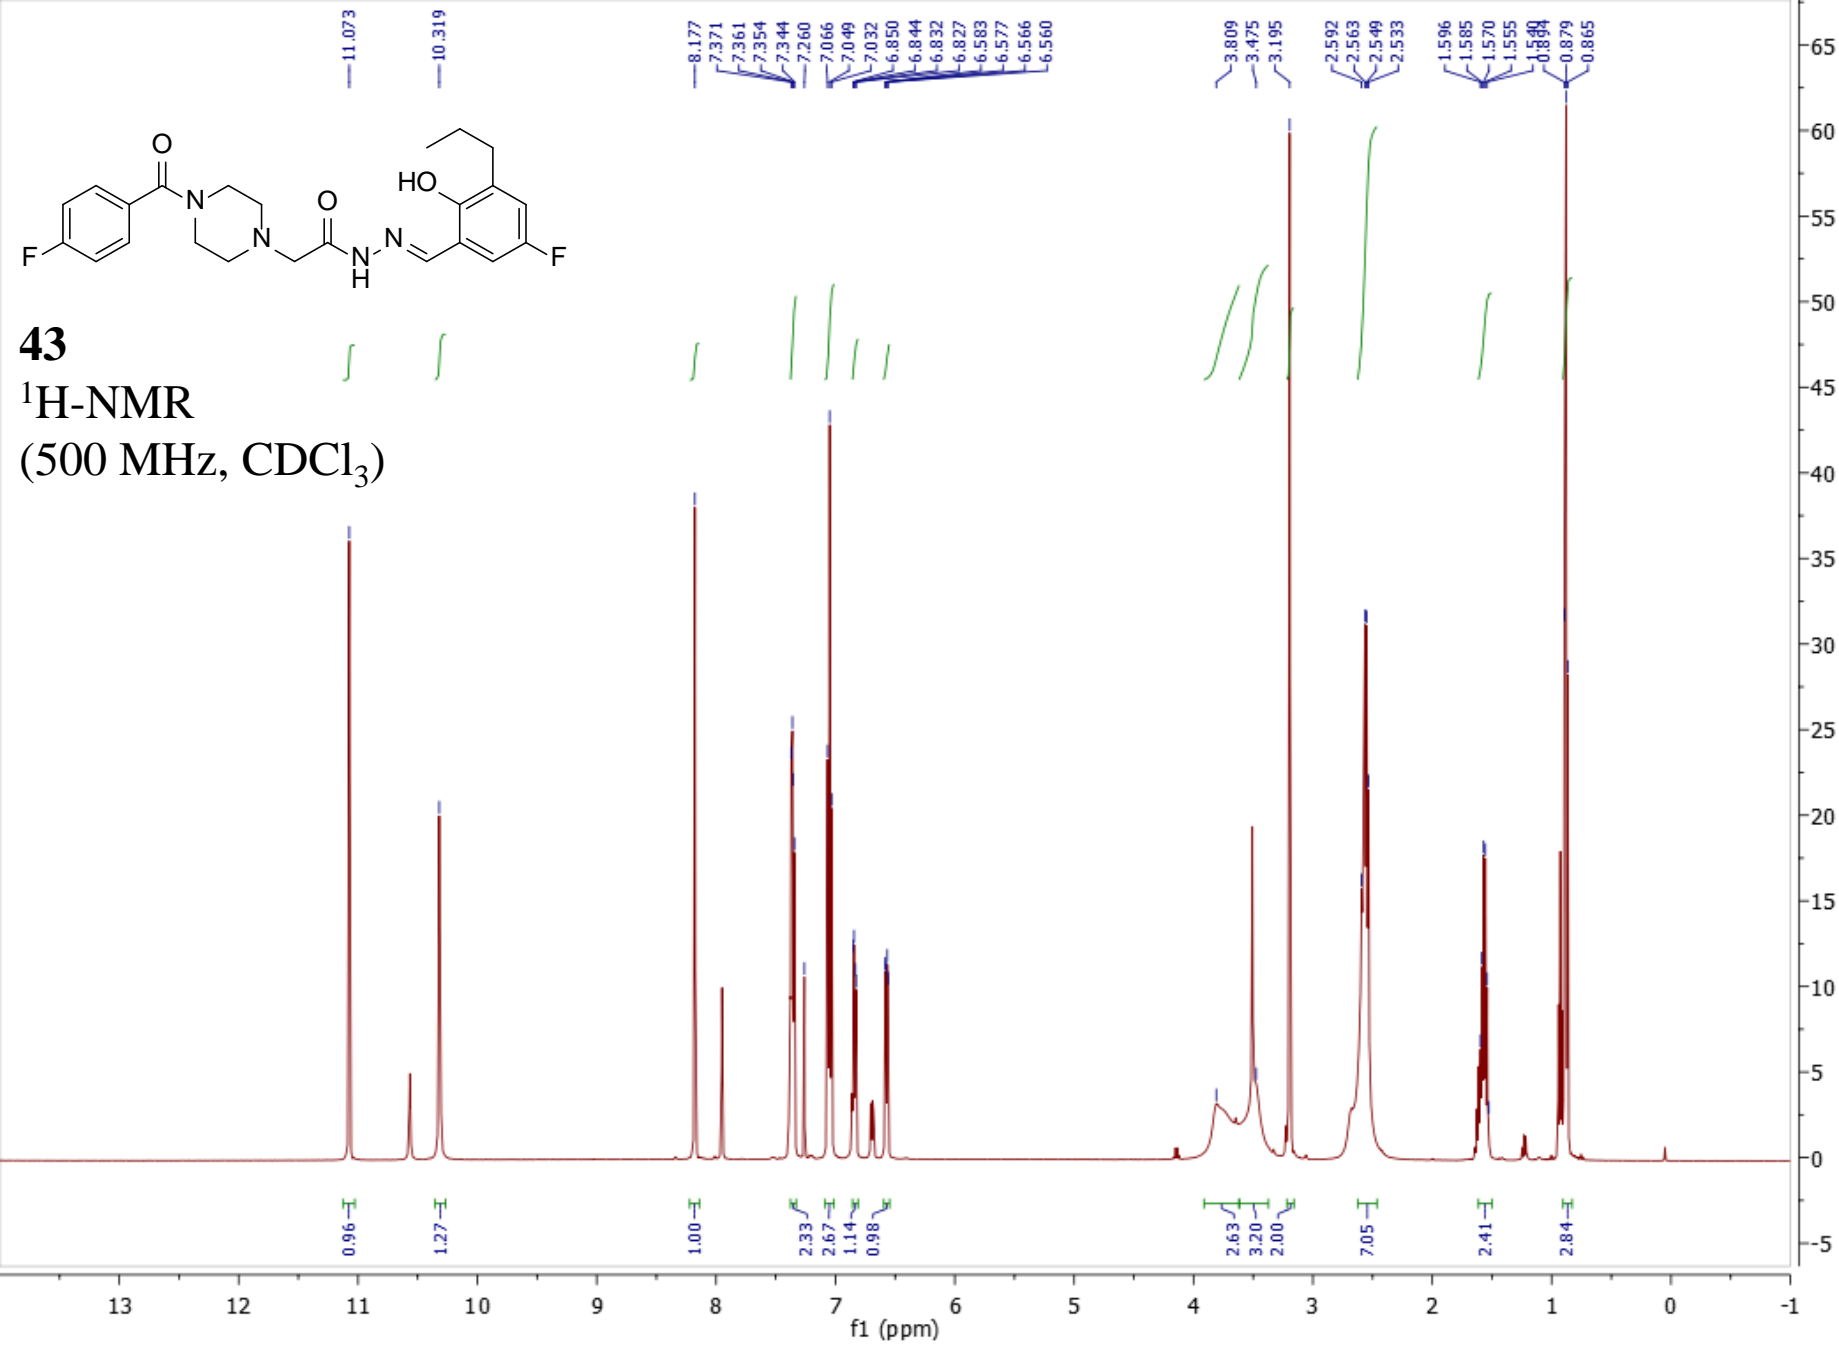

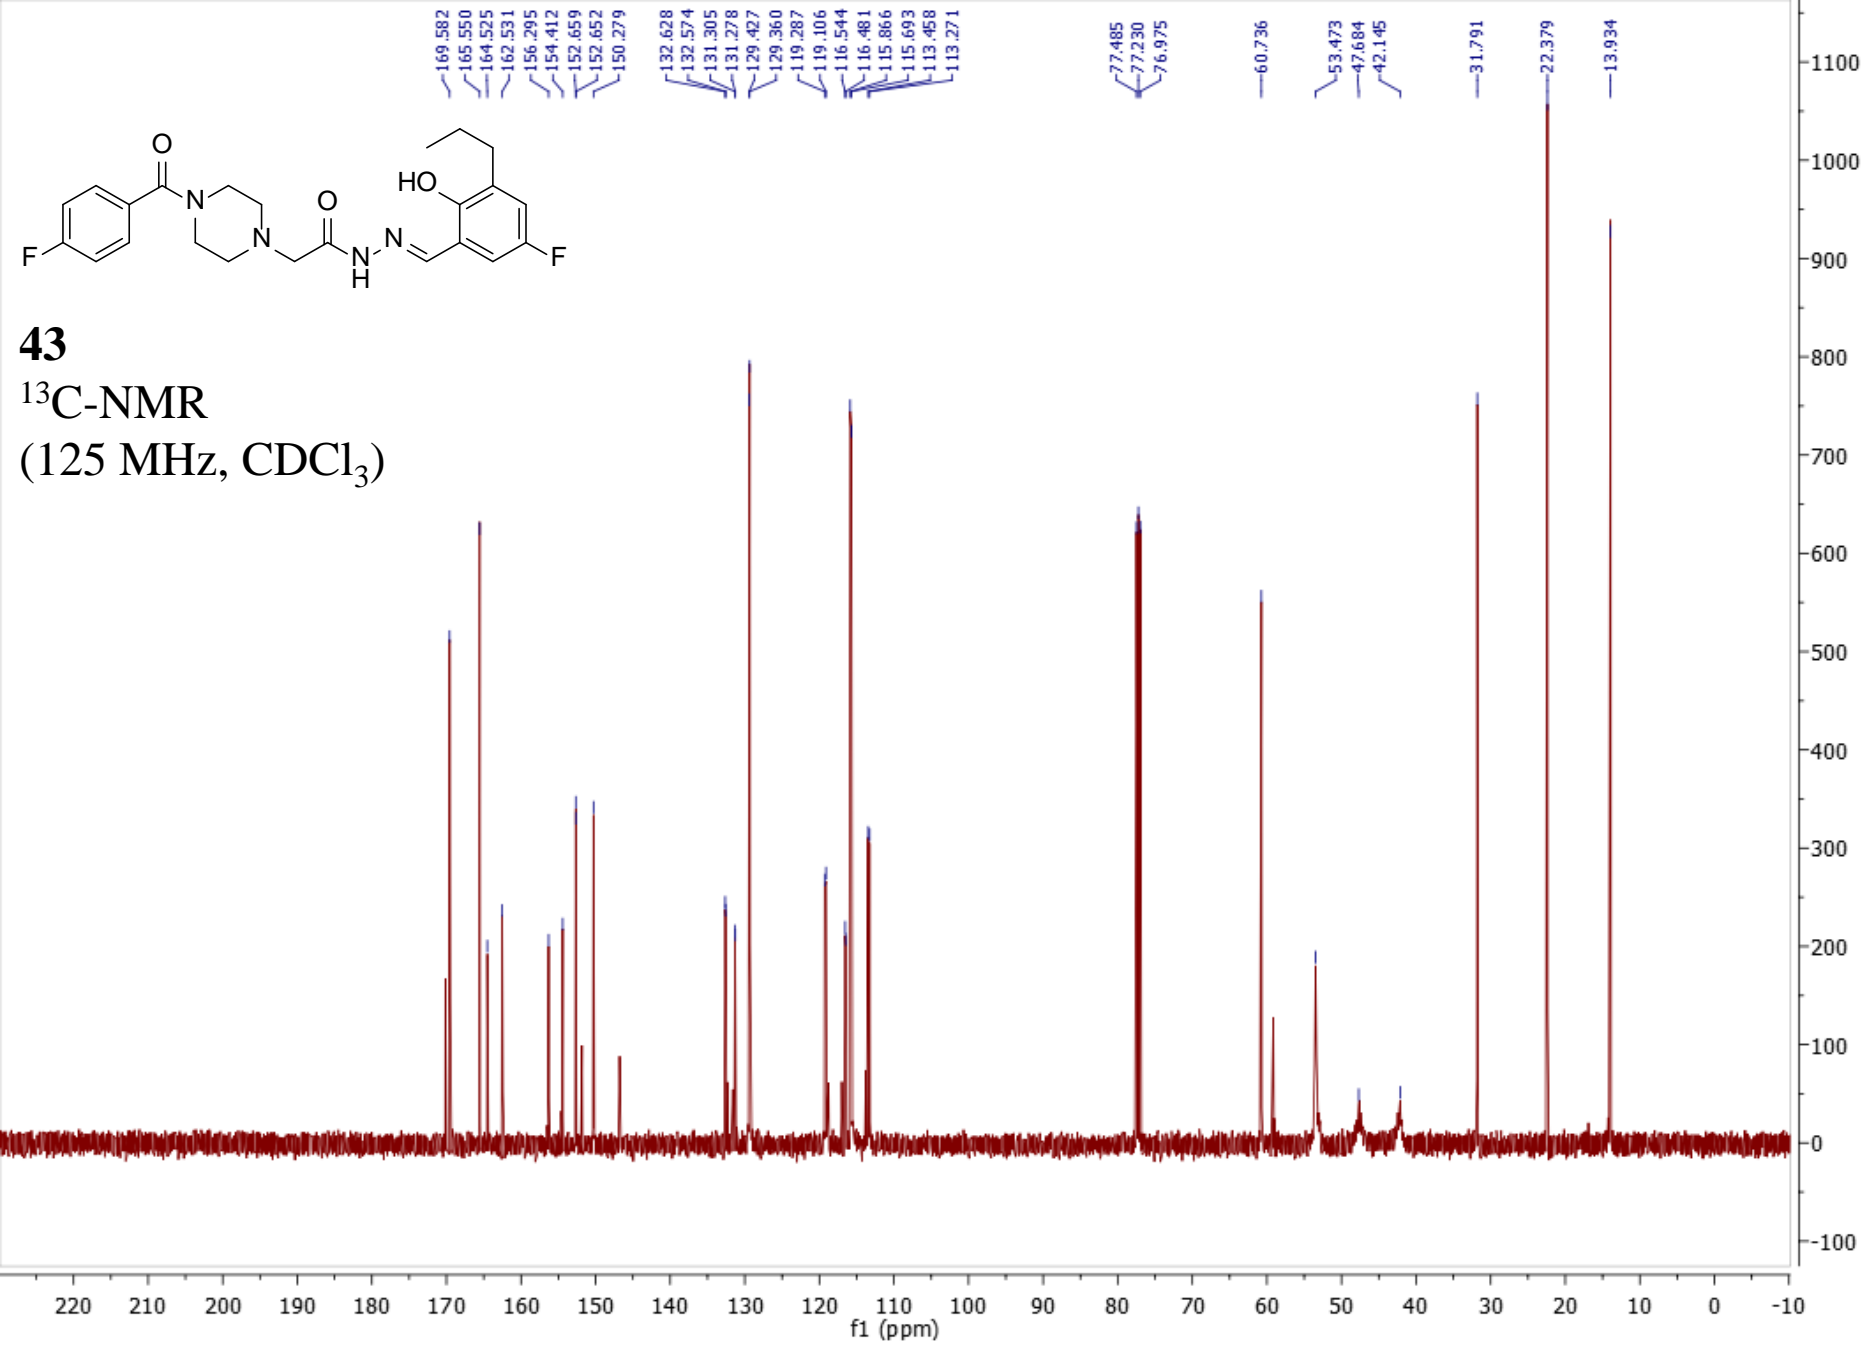



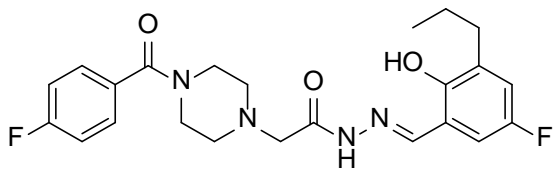

**43**

<sup>19</sup>F-NMR

(470 MHz, CDCl<sub>3</sub>)

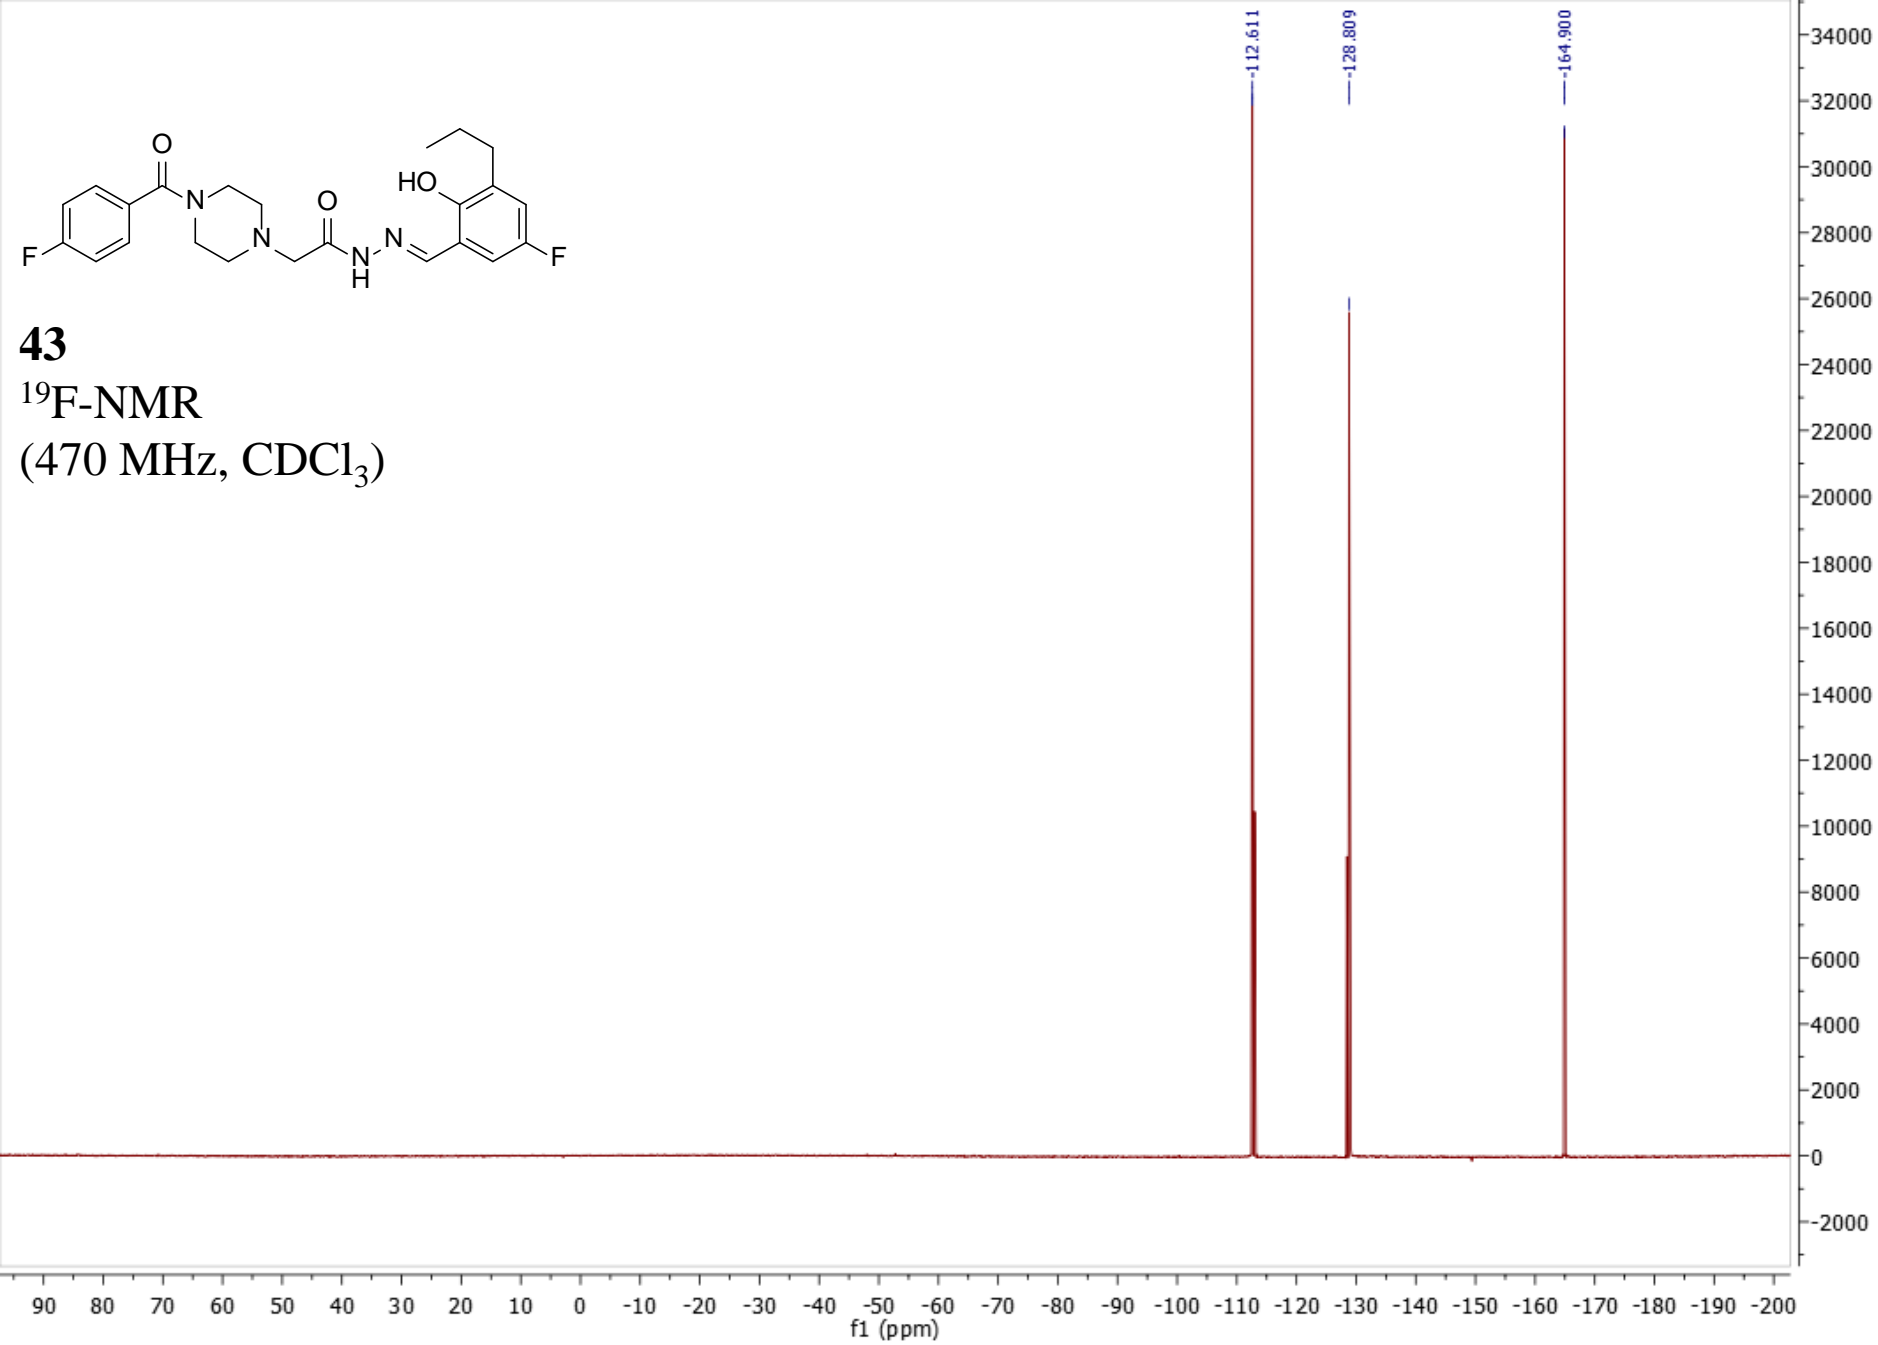

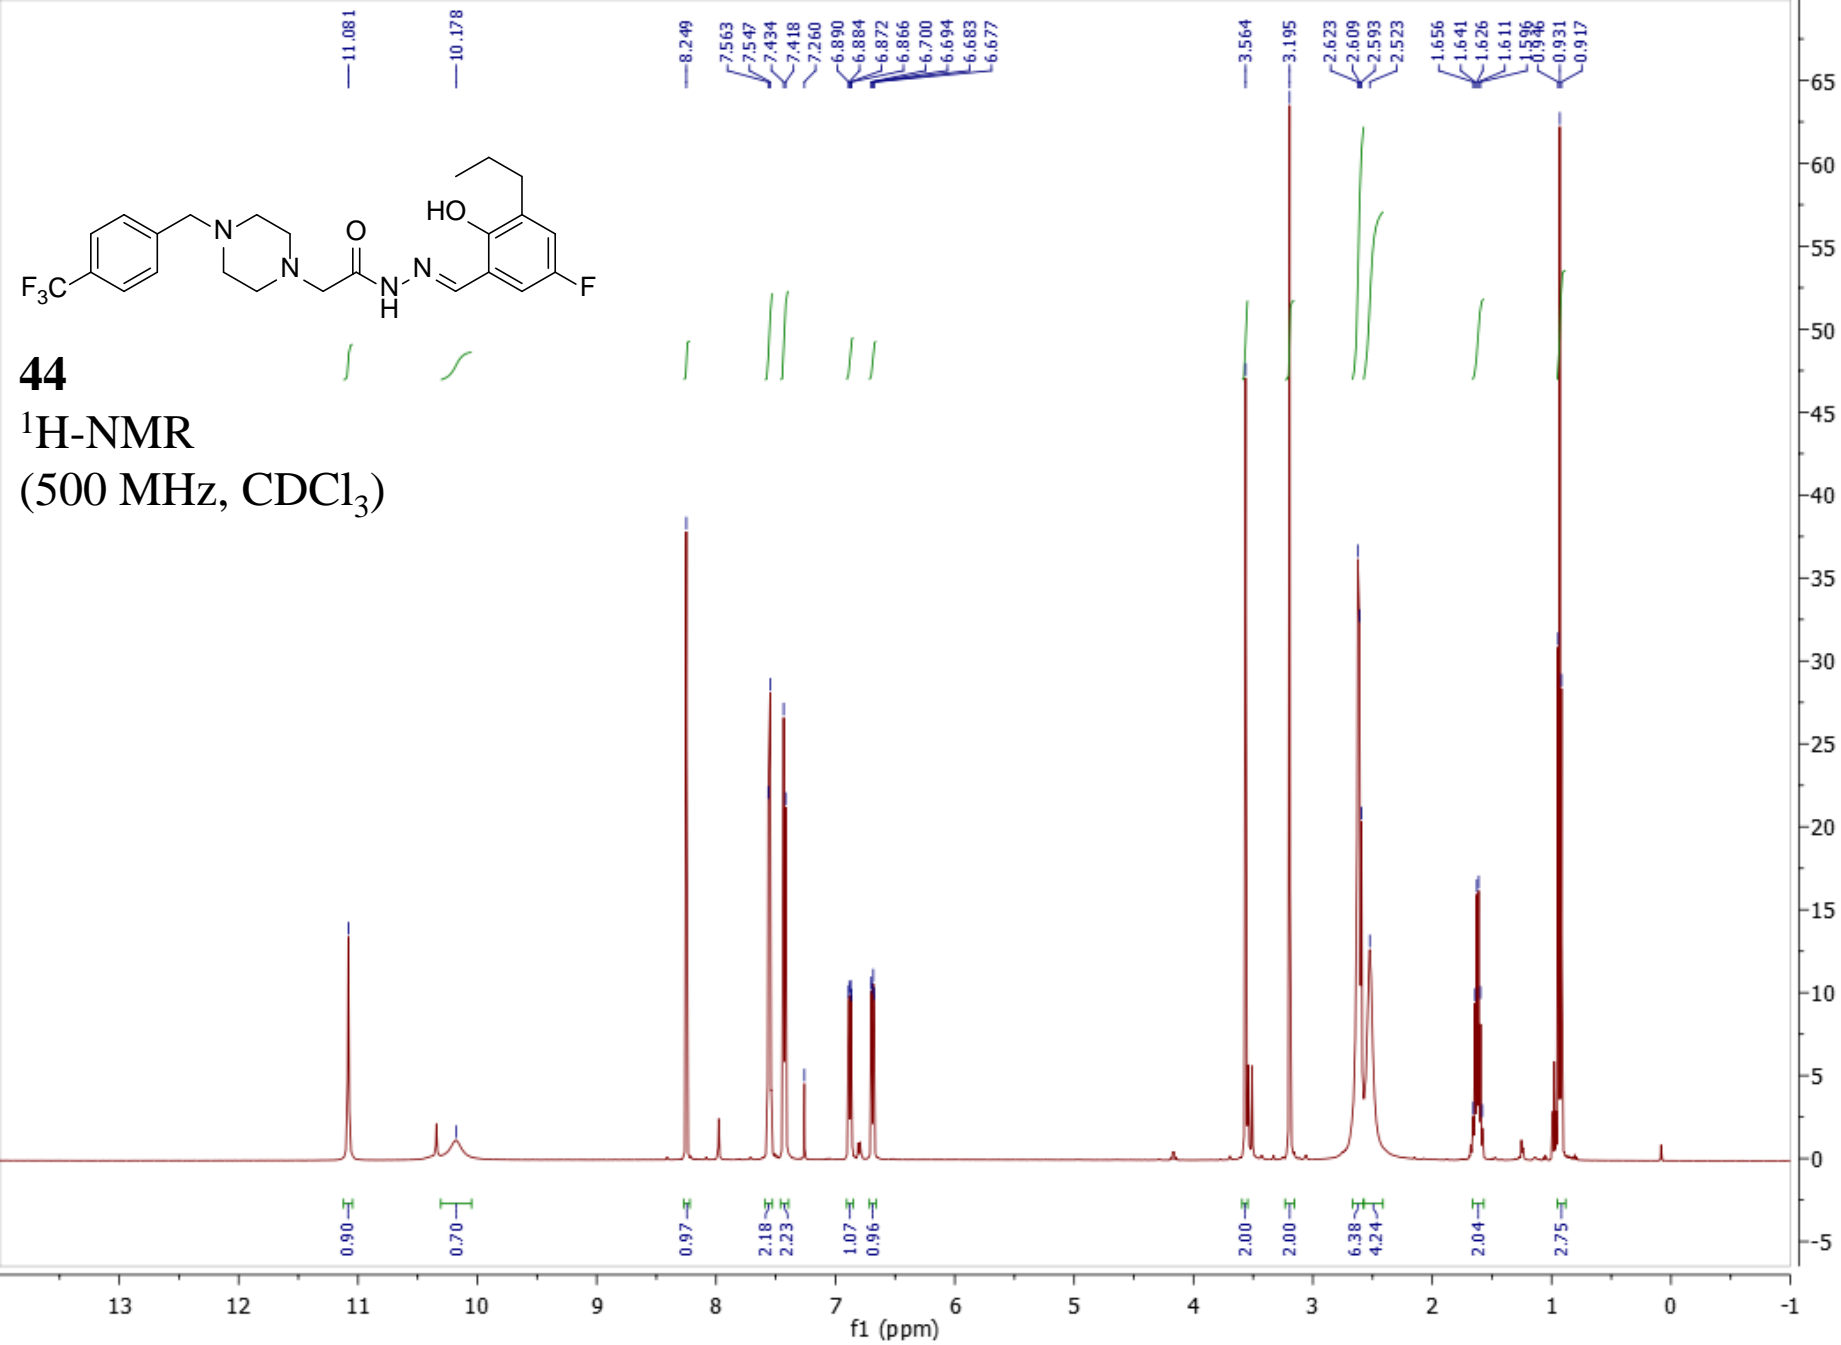

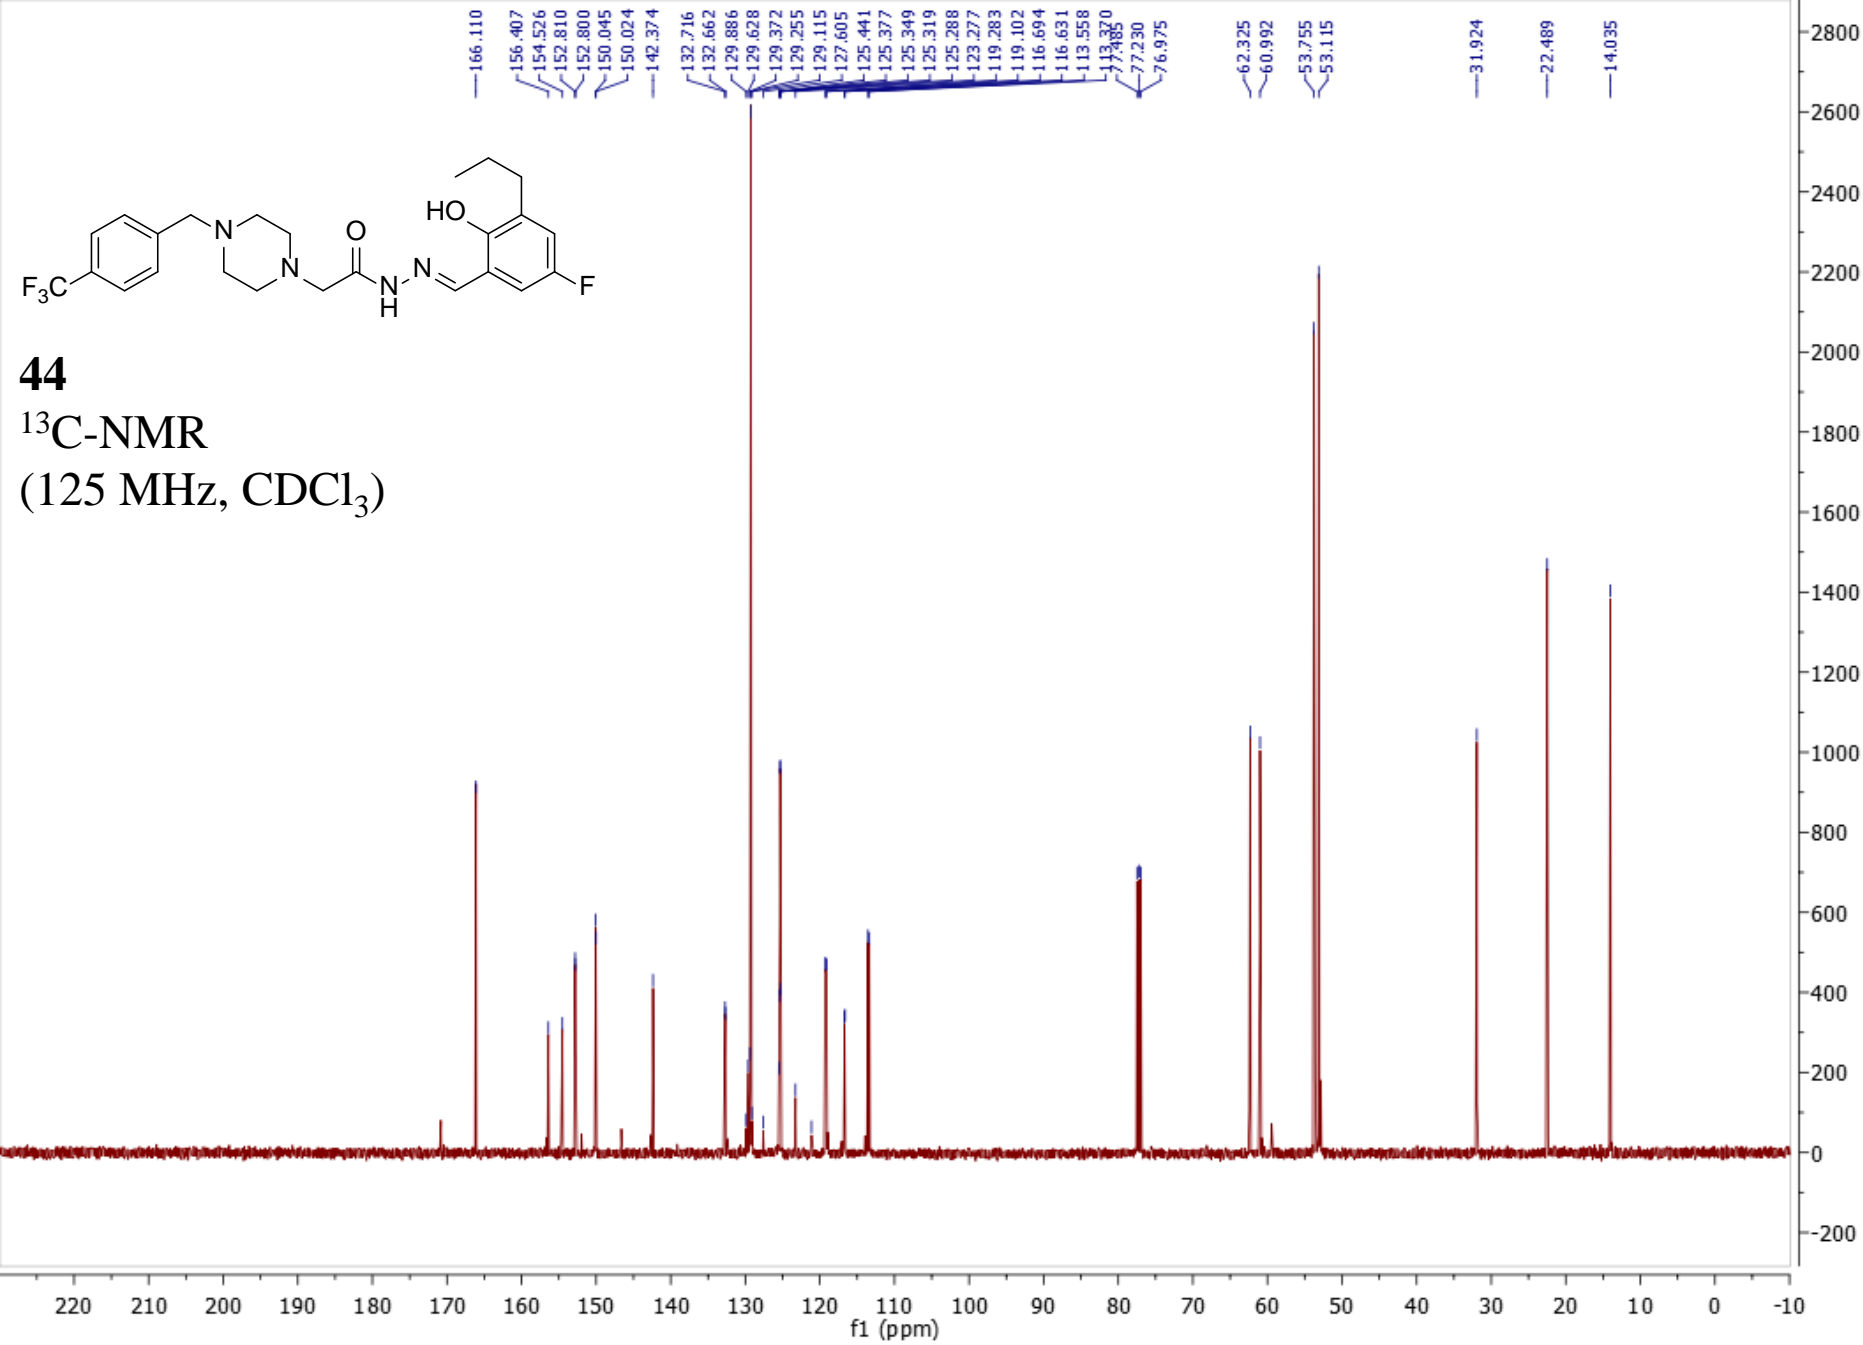



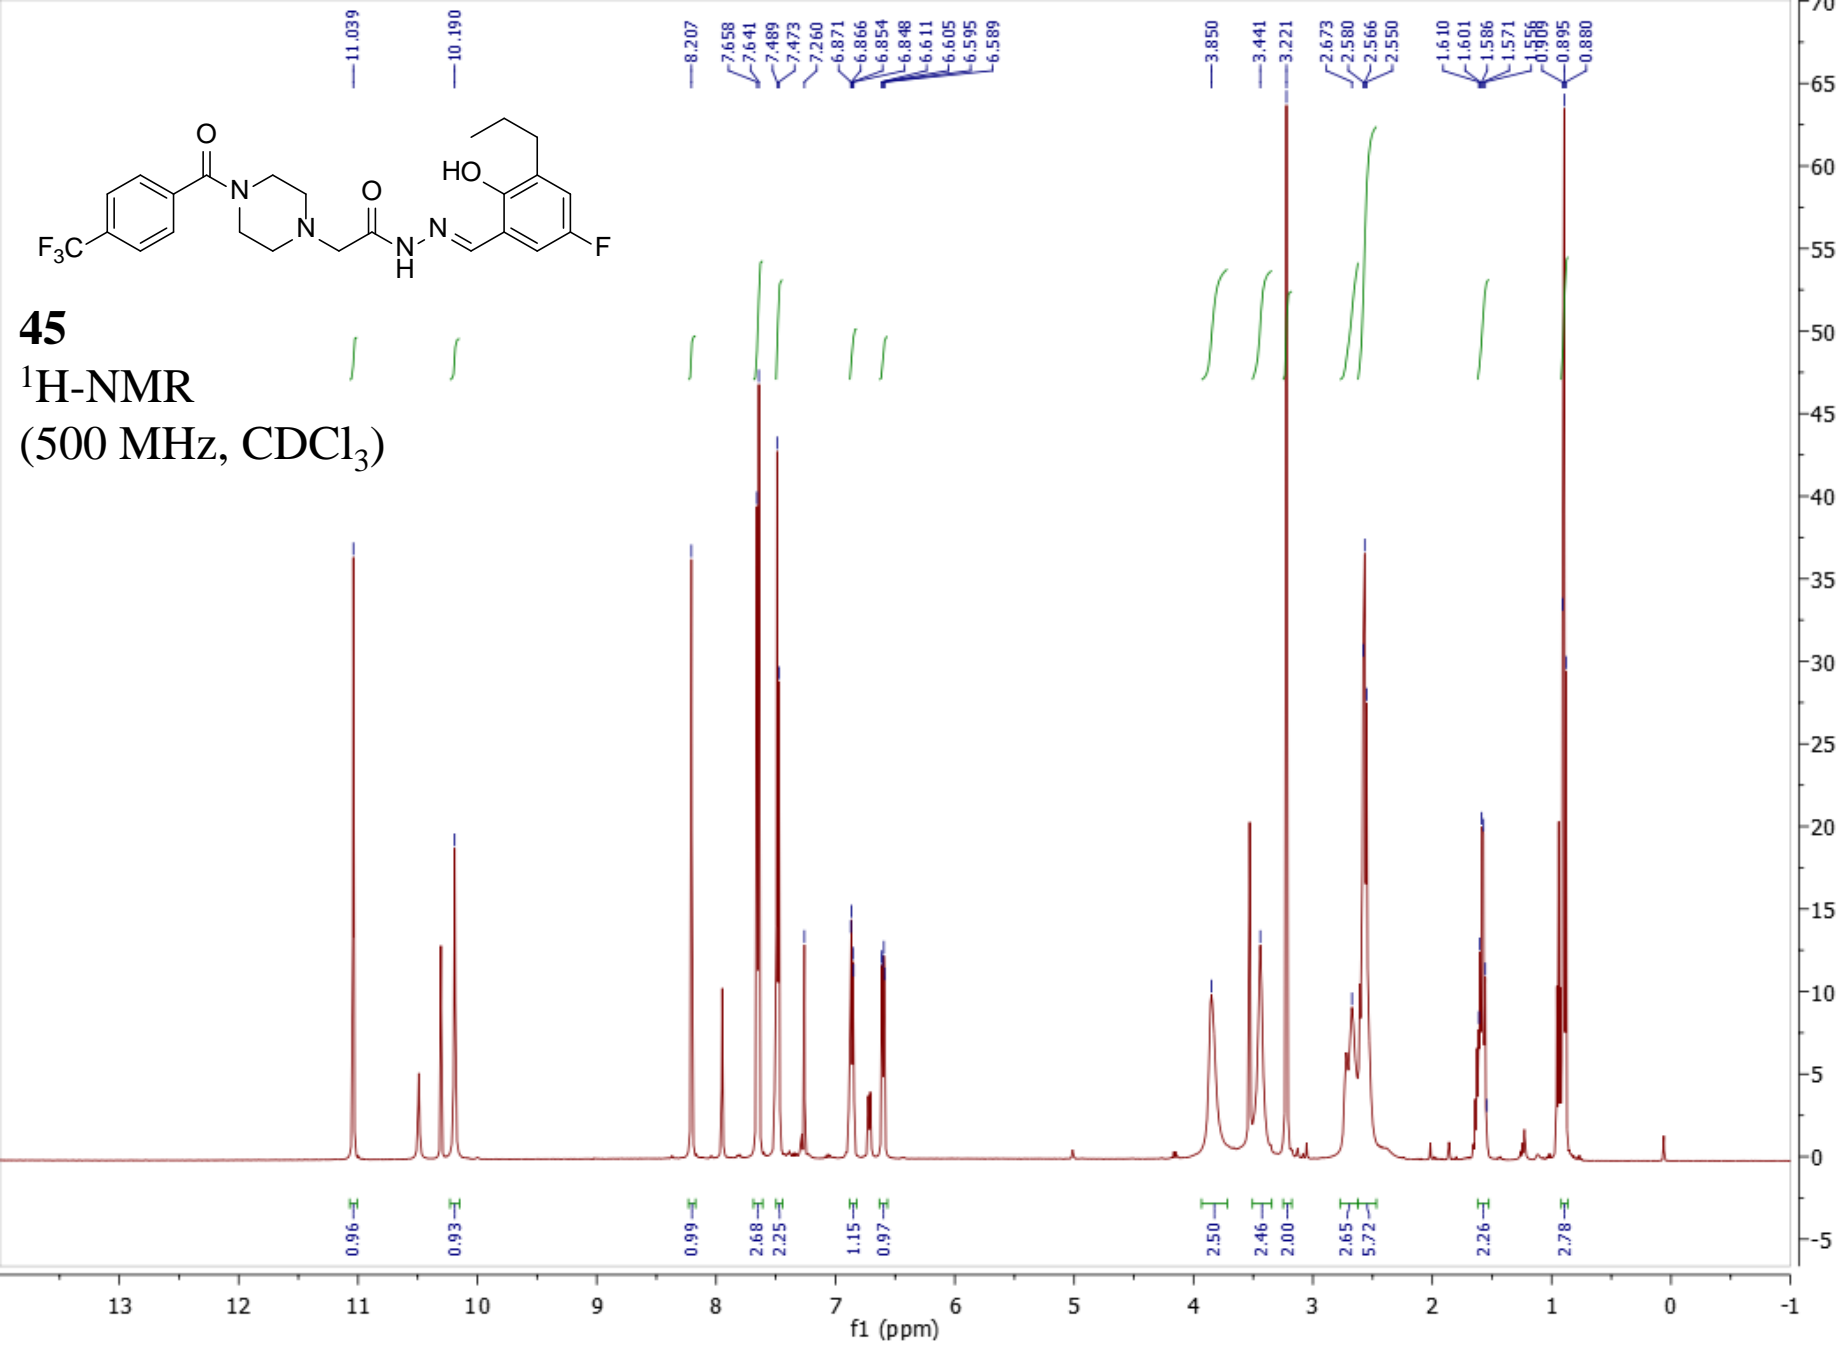

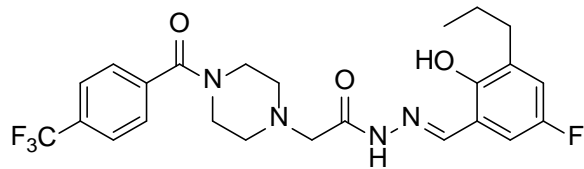

**45**

$^{13}\text{C}$ -NMR

(125 MHz,  $\text{CDCl}_3$ )

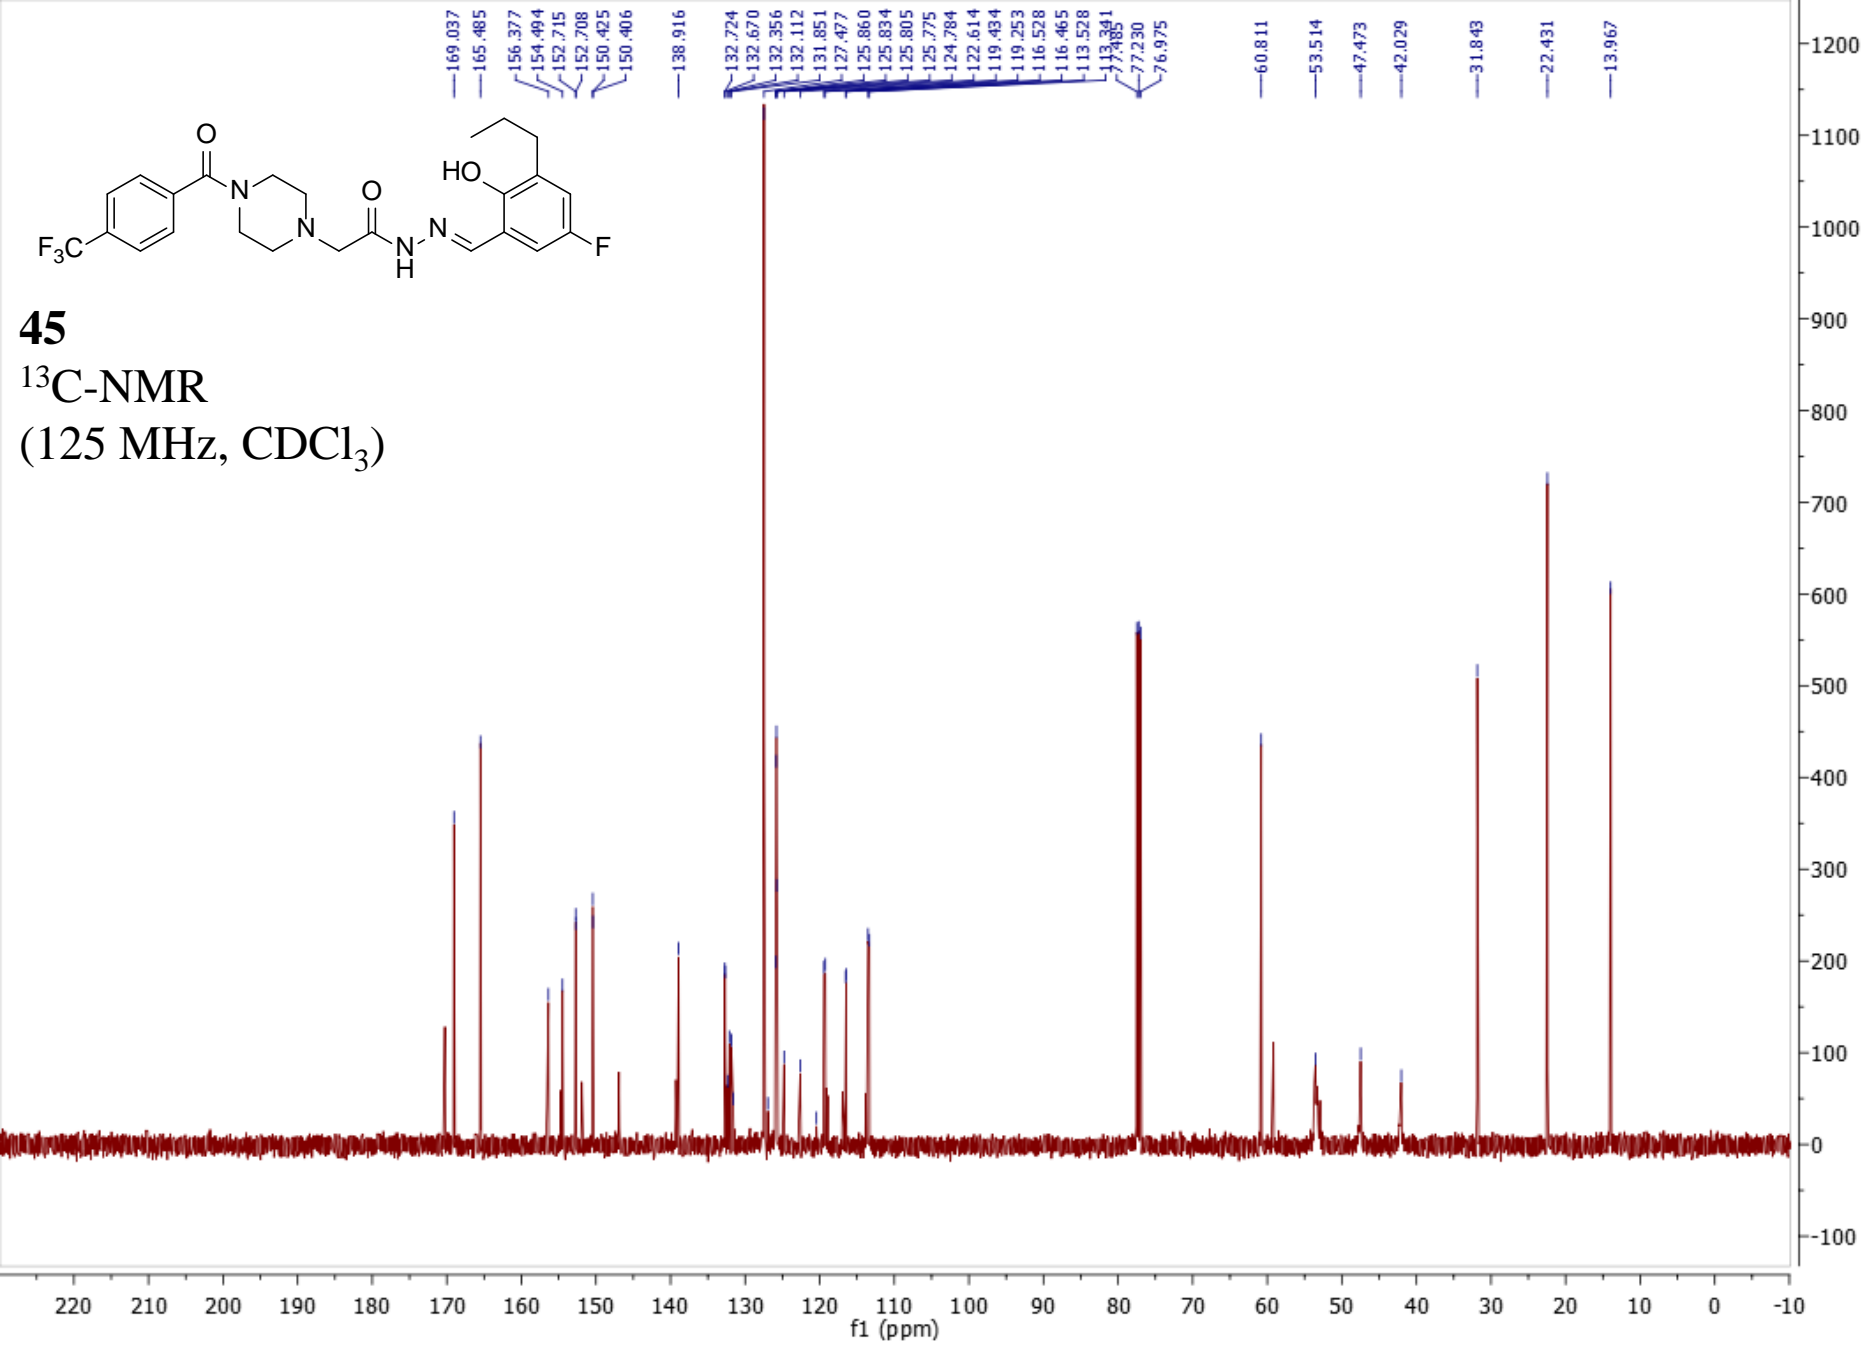

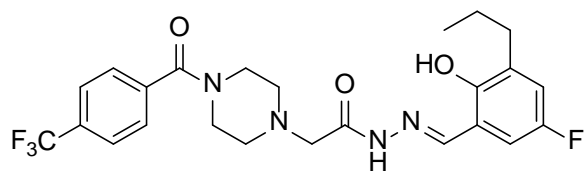

**45**  
<sup>19</sup>F-NMR  
(470 MHz, CDCl<sub>3</sub>)

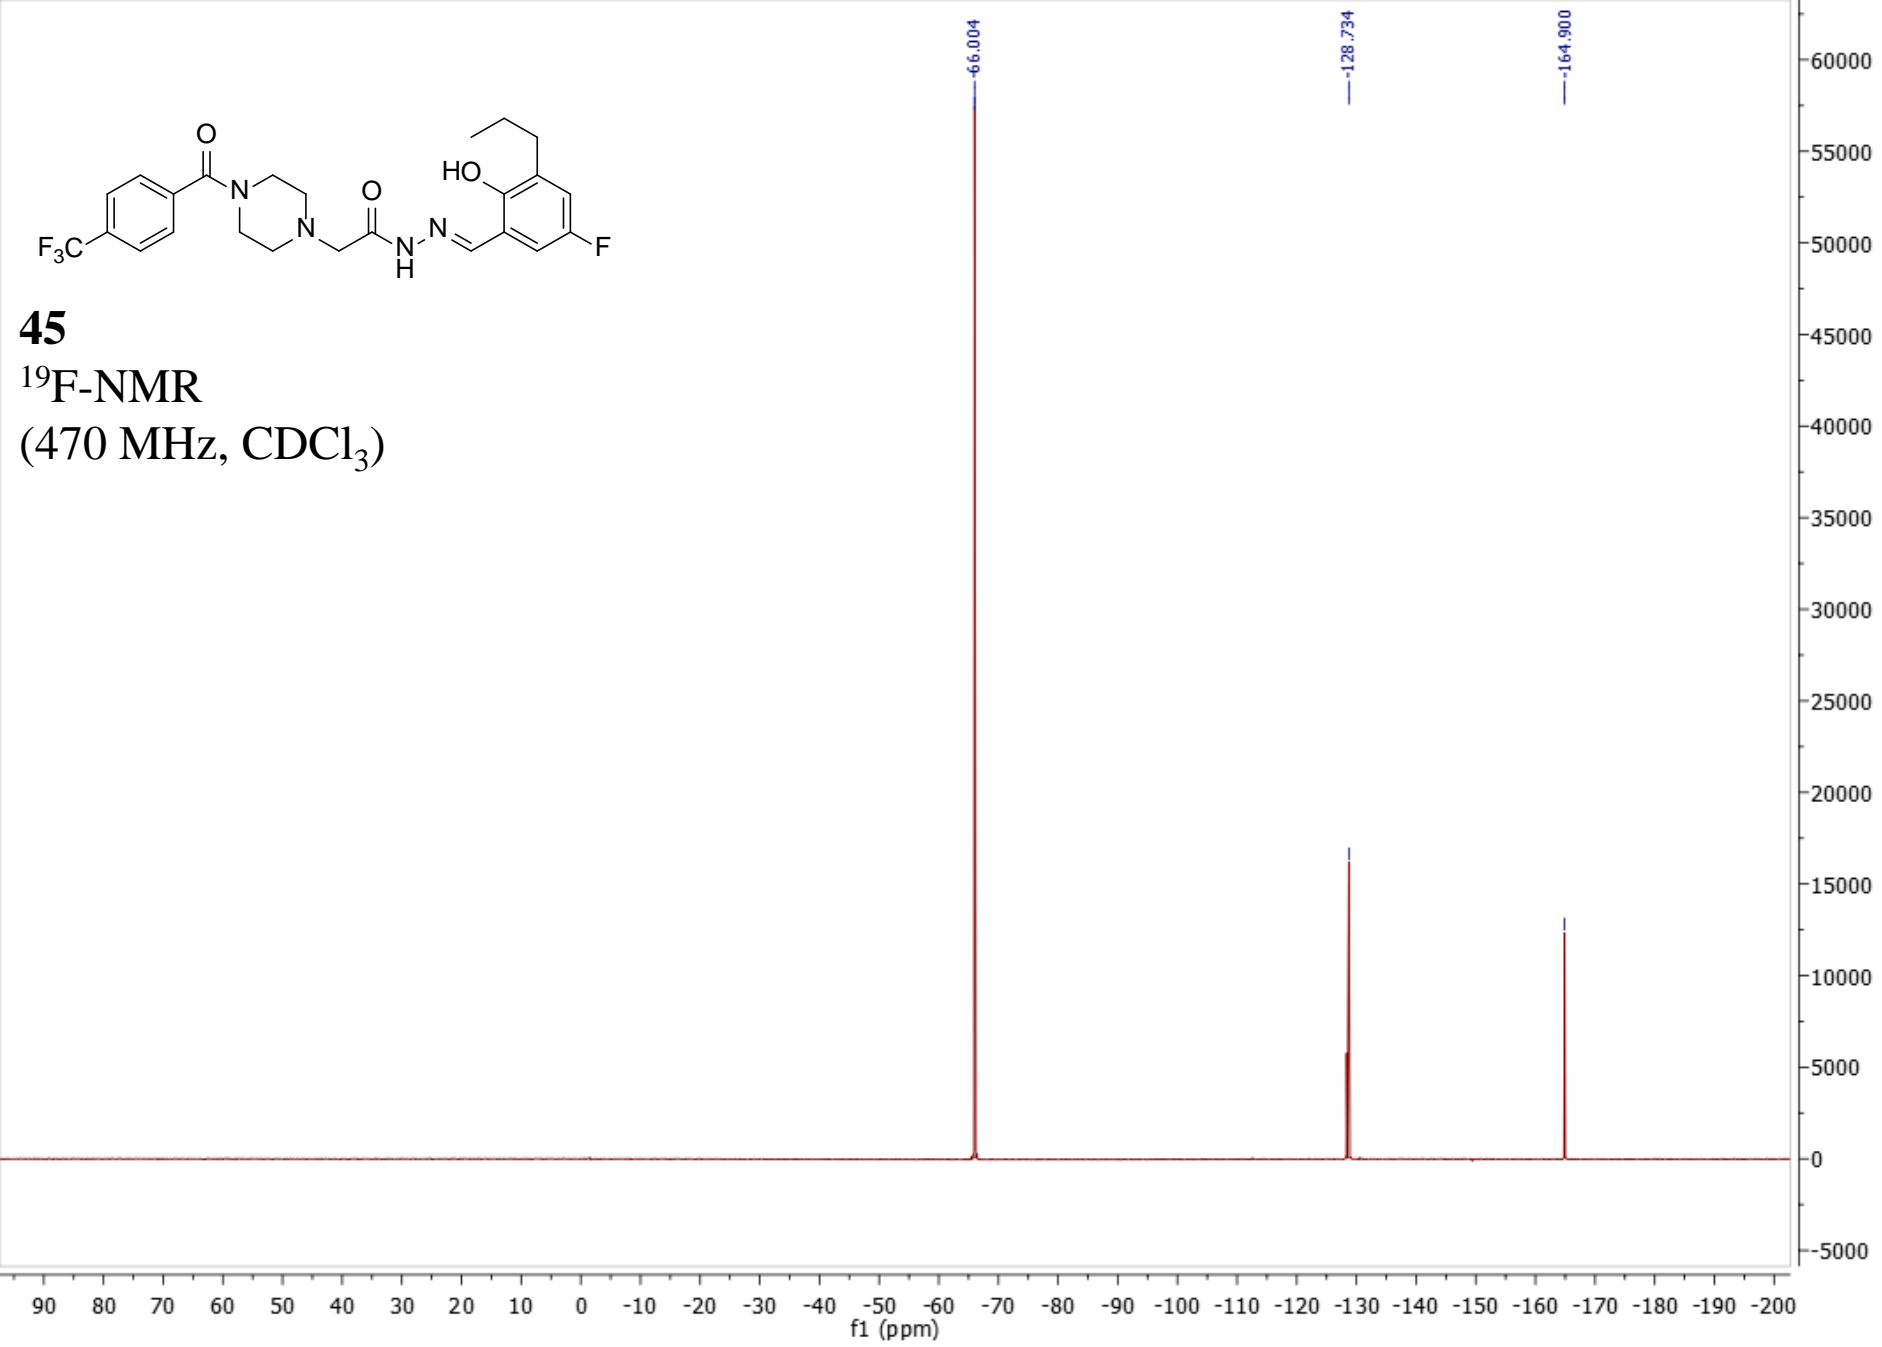

Supplement: NIHMS686497-supplement-Full_SI.pdf [file NIHMS686497-supplement-Full_SI.pdf]
